# Supplementary material for: Genomic architecture and evolutionary antagonism drive allelic expression bias in the social supergene of red fire ants
Source: eLife journal article supplement (doi:10.7554/elife.55862), 2020-08-10
Supplement: supp [file elife-55862-supp-v1.zip]

Archive with 24 entries (24 files):
- elife_poa_e55862_Figure_1_figure_supplement_1.pdf
- elife_poa_e55862_Figure_1_figure_supplement_2.pdf
- elife_poa_e55862_Figure_1_figure_supplement_3.pdf
- elife_poa_e55862_Figure_1_figure_supplement_4.pdf
- elife_poa_e55862_Figure_1_figure_supplement_5.pdf
- elife_poa_e55862_Figure_3_figure_supplement_1.pdf
- elife_poa_e55862_Figure_4_figure_supplement_1.pdf
- elife_poa_e55862_Figure_4_figure_supplement_2.pdf
- elife_poa_e55862_Transparent_Reporting_File.docx
- elife_poa_e55862_Figure_1_source_data_1.csv
- elife_poa_e55862_Figure_2_source_data_1.csv
- elife_poa_e55862_Figure_3_source_data_1.csv
- elife_poa_e55862_Figure_4_source_data_1.csv
- elife_poa_e55862_Figure_1_figure_supplement_2_source_data_1.csv
- elife_poa_e55862_Figure_1_figure_supplement_3_source_data_1.csv
- elife_poa_e55862_Figure_1_figure_supplement_4_source_data_1.csv
- elife_poa_e55862_Figure_3_figure_supplement_1_source_data_1.csv
- elife_poa_e55862_Figure_4_figure_supplement_2_source_data_1.csv
- elife_poa_e55862_Supplementary_file_1.xlsx
- elife_poa_e55862_Supplementary_file_2.xlsx
- elife_poa_e55862_Supplementary_file_3.xlsx
- elife_poa_e55862_Supplementary_file_4.xlsx
- elife_poa_e55862_Supplementary_file_5.xlsx
- elife_poa_e55862_Supplementary_file_6.xlsx
