# Supplementary material for: Genomic architecture and evolutionary antagonism drive allelic expression bias in the social supergene of red fire ants
Source: eLife journal article supplement (doi:10.7554/elife.55862), 2020-08-10
Supplement: supp [file elife-55862-supp-v1.zip › elife_poa_e55862_Figure_1_figure_supplement_2_source_data_1.csv]

refseq_id	body_part	median_expression	mean_lfc	sd_lfc	littleb_expression	bigB_expression	sample_id	population	total_expression	lfc_SB-Sb	normalized_lfc	significant
LOC105193114	QA	15.9799468322576	0.297259275323424	1.07755291546055	8.33619179905195	4.01037677642904	3QA	south_america	12.346568575481	-0.897915102466495	-1.10915608935929	no
LOC105193114	QA	15.9799468322576	0.297259275323424	1.07755291546055	9.03988189835549	10.5734431906788	112BQA	south_america	19.6133250890343	0.205075842859109	-0.0855488683123427	no
LOC105193114	QA	15.9799468322576	0.297259275323424	1.07755291546055	4.84951997672196	5.00595610500331	43QA	south_america	9.85547608172527	0.0380756917643513	-0.240529796579222	no
LOC105193114	QA	15.9799468322576	0.297259275323424	1.07755291546055	13.7396431016094	8.33334681980473	114CQA	south_america	22.0729899214141	-0.659235181043646	-0.887654279101703	no
LOC105193114	QA	15.9799468322576	0.297259275323424	1.07755291546055	3.77847745849355	7.05736899162397	118QA	south_america	10.8358464501175	0.753757813070475	0.423643731270444	no
LOC105193114	QA	15.9799468322576	0.297259275323424	1.07755291546055	8.6508863973096	12.1573219692938	111BQA	south_america	20.8082083666034	0.44713251432155	0.139086662796573	no
LOC105193114	QH	4.0859747749849	-0.156919105199937	1.54693179210804	7.14286870268977	1.84743618160836	3QH	south_america	8.99030488429813	-1.51587363241928	-0.878483805266854	no
LOC105193114	QH	4.0859747749849	-0.156919105199937	1.54693179210804	1.70513014071517	1.45384843871833	112BQH	south_america	3.1589785794335	-0.140651858043397	0.0105158141034599	no
LOC105193114	QH	4.0859747749849	-0.156919105199937	1.54693179210804	0	0	43QH	south_america	0	0	0.10143892962863	no
LOC105193114	QH	4.0859747749849	-0.156919105199937	1.54693179210804	1.36410411257214	0	111BQH	south_america	1.36410411257214	-1.24129357163393	-0.700984020088105	no
LOC105193114	QH	4.0859747749849	-0.156919105199937	1.54693179210804	5.01297097053631	0	114CQH	south_america	5.01297097053631	-2.58807799349749	-1.57160057133777	no
LOC105193114	QH	4.0859747749849	-0.156919105199937	1.54693179210804	3.89289887878932	4.76191246845985	118QH	south_america	8.65481134724917	0.235858277102953	0.253907369611716	no
LOC105193114	QT	7.68537684794275	0.182227205719409	1.1287051691787	2.35190364236576	5.18434018743612	111BQT	south_america	7.53624382980188	0.883639004758702	0.621430483524475	no
LOC105193114	QT	7.68537684794275	0.182227205719409	1.1287051691787	3.50360899091039	1.93846458495777	114CQT	south_america	5.44207357586816	-0.616019065484329	-0.707223013592276	no
LOC105193114	QT	7.68537684794275	0.182227205719409	1.1287051691787	2.49231160923143	10.1503923669802	3QT	south_america	12.6427039762116	1.6748402800133	1.32241183530681	no
LOC105193114	QT	7.68537684794275	0.182227205719409	1.1287051691787	7.00721798182078	6.48737419716463	118QT	south_america	13.4945921789854	-0.0968412235136102	-0.247246523586034	no
LOC105193114	QT	7.68537684794275	0.182227205719409	1.1287051691787	2.82153889554732	5.01297097053631	112BQT	south_america	7.83450986608363	0.653924279347193	0.417909908192424	no
LOC105193114	QT	7.68537684794275	0.182227205719409	1.1287051691787	0	1.70532570610003	43QT	south_america	1.70532570610003	1.43580229693114	1.11063112444492	no
LOC105193114	W	10.4907536469515	0.127073279071061	1.3566622902154	7.78579775757864	5.01297097053631	3BW	south_america	12.7987687281149	-0.547095296566402	-0.496931757077456	no
LOC105193114	W	10.4907536469515	0.127073279071061	1.3566622902154	3.0612294440099	7.20001131555745	28W	south_america	10.2612407595674	1.0137093642258	0.653542220160016	no
LOC105193114	W	10.4907536469515	0.127073279071061	1.3566622902154	5.19053183838576	4.30267770813557	112W	south_america	9.49320954652133	-0.223342293509559	-0.258292410062481	no
LOC105193114	W	10.4907536469515	0.127073279071061	1.3566622902154	4.87180040204335	5.84846613229236	104W	south_america	10.7202665343357	0.221977972305321	0.0699545450026422	no
LOC105193114	W	10.4907536469515	0.127073279071061	1.3566622902154	2.77115427241255	6.30253120825568	114W	south_america	9.07368548066822	0.953390448366943	0.609080959392398	no
LOC105193114	W	10.4907536469515	0.127073279071061	1.3566622902154	5.42770083788177	6.15812060536122	43CW	south_america	11.585821443243	0.155278067812058	0.0207898376363943	no
LOC105193116	QA	14.0673693178833	0.297259275323424	1.07755291546055	6.06268494476506	5.0129709705363	3QA	south_america	11.0756559153014	-0.232138748089642	-0.491296544065125	no
LOC105193116	QA	14.0673693178833	0.297259275323424	1.07755291546055	4.84951997672196	9.29677562357758	43QA	south_america	14.1462956002995	0.815802492190951	0.481222972373381	no
LOC105193116	QA	14.0673693178833	0.297259275323424	1.07755291546055	12.3656787914484	32.142909162104	114CQA	south_america	44.5085879535524	1.31016713418039	0.940007534037481	no
LOC105193116	QA	14.0673693178833	0.297259275323424	1.07755291546055	8.18670116006936	10.1939774323457	118QA	south_america	18.3806785924151	0.28510394006581	-0.0112804996239271	no
LOC105193116	QA	14.0673693178833	0.297259275323424	1.07755291546055	3.65899981600103	3.4363690369706	112BQA	south_america	7.09536885297163	-0.0706408931678135	-0.341421904402715	no
LOC105193116	QA	14.0673693178833	0.297259275323424	1.07755291546055	5.4068039983185	8.58163903714853	111BQA	south_america	13.988443035467	0.580667609598012	0.263011059789541	no
LOC105193116	QH	20.3515292498651	-0.156919105199937	1.54693179210804	7.78579775757864	7.14286870268977	118QH	south_america	14.9286664602684	-0.109636149867115	0.0305656368134941	no
LOC105193116	QH	20.3515292498651	-0.156919105199937	1.54693179210804	17.5453983968771	13.6410411257214	114CQH	south_america	31.1864395225984	-0.341043113067872	-0.11902529174672	no
LOC105193116	QH	20.3515292498651	-0.156919105199937	1.54693179210804	7.51945645580446	5.81539375487332	43QH	south_america	13.3348502106778	-0.321964378765402	-0.106692017325828	no
LOC105193116	QH	20.3515292498651	-0.156919105199937	1.54693179210804	28.5714748107591	1.84743618160836	3QH	south_america	30.4189109923674	-3.37647078353091	-2.08124992630969	no
LOC105193116	QH	20.3515292498651	-0.156919105199937	1.54693179210804	4.09231233771641	6.82052056286069	111BQH	south_america	10.9128329005771	0.618943731999955	0.501549480822685	no
LOC105193116	QH	20.3515292498651	-0.156919105199937	1.54693179210804	17.0513014071517	8.72309063230999	112BQH	south_america	25.7743920394617	-0.892615977432639	-0.475584557758783	no
LOC105193116	QT	10.1132377940645	0.182227205719409	1.1287051691787	3.50360899091039	2.90769687743666	114CQT	south_america	6.41130586834705	-0.20476301536448	-0.342862096897706	no
LOC105193116	QT	10.1132377940645	0.182227205719409	1.1287051691787	2.11671327812918	10.7143030540346	111BQT	south_america	12.8310163321638	1.91017377765369	1.53091047965308	no
LOC105193116	QT	10.1132377940645	0.182227205719409	1.1287051691787	5.24000080601645	5.01297097053631	112BQT	south_america	10.2529717765528	-0.0534682219419324	-0.208819303833653	no
LOC105193116	QT	10.1132377940645	0.182227205719409	1.1287051691787	9.13847590051523	10.1503923669802	3QT	south_america	19.2888682674954	0.137253686694536	-0.0398452317336316	no
LOC105193116	QT	10.1132377940645	0.182227205719409	1.1287051691787	2.86054634571618	4.26331426525007	43QT	south_america	7.12386061096625	0.447166506146071	0.234728525802221	no
LOC105193116	QT	10.1132377940645	0.182227205719409	1.1287051691787	5.25541348636558	4.71809032521064	118QT	south_america	9.97350381157622	-0.129571840971256	-0.276244900089848	no
LOC105193116	W	15.0605113683608	0.127073279071061	1.3566622902154	2.59526591919288	4.91734595215493	112W	south_america	7.51261187134781	0.718851761700635	0.436201762883538	no
LOC105193116	W	15.0605113683608	0.127073279071061	1.3566622902154	8.74636984002829	7.7538583398311	28W	south_america	16.5002281798594	-0.154945931096028	-0.207877238278888	no
LOC105193116	W	15.0605113683608	0.127073279071061	1.3566622902154	4.61859045402091	7.56303744990681	114W	south_america	12.1816279039277	0.60791439070089	0.354429481159594	no
LOC105193116	W	15.0605113683608	0.127073279071061	1.3566622902154	7.7538583398311	8.6213688475057	43CW	south_america	16.3752271873368	0.136323125512028	0.0068180906240853	no
LOC105193116	W	15.0605113683608	0.127073279071061	1.3566622902154	5.35898044224769	9.19044677931656	104W	south_america	14.5494272215642	0.680349928124651	0.407821941424897	no
LOC105193116	W	15.0605113683608	0.127073279071061	1.3566622902154	15.5715955151573	0	3BW	south_america	15.5715955151573	-4.05064060698147	-3.07940591861608	no
LOC105193120	QA	2.13171766098136	0.297259275323424	1.07755291546055	0.860941133176714	1.32168039883485	112BQA	south_america	2.18262153201156	0.319136965716136	0.0203031239383373	no
LOC105193120	QA	2.13171766098136	0.297259275323424	1.07755291546055	1.38557713620627	0.715136586429044	43QA	south_america	2.10071372263532	-0.476014864478462	-0.717620572230914	no
LOC105193120	QA	2.13171766098136	0.297259275323424	1.07755291546055	0.757835618095632	2.00518838821452	3QA	south_america	2.76302400631015	0.773655268060679	0.442109139980047	no
LOC105193120	QA	2.13171766098136	0.297259275323424	1.07755291546055	2.1627215993274	0	111BQA	south_america	2.1627215993274	-1.66116656725371	-1.81747533181709	no
LOC105193120	QA	2.13171766098136	0.297259275323424	1.07755291546055	1.25949248616452	0	118QA	south_america	1.25949248616452	-1.17599875940271	-1.36722569591533	no
LOC105193120	QA	2.13171766098136	0.297259275323424	1.07755291546055	0.686982155080468	1.19047811711496	114CQA	south_america	1.87746027219543	0.376801089344715	0.0738170839501603	no
LOC105193120	QH	0.726924219359166	-0.156919105199937	1.54693179210804	1.29763295959644	2.38095623422992	118QH	south_america	3.67858919382636	0.557282991052306	0.461689455149787	no
LOC105193120	QH	0.726924219359166	-0.156919105199937	1.54693179210804	5.01297097053631	2.2735068542869	114CQH	south_america	7.2864778248232	-0.877240993756836	-0.465645539274425	no
LOC105193120	QH	0.726924219359166	-0.156919105199937	1.54693179210804	0	1.45384843871833	112BQH	south_america	1.45384843871833	1.2950461440856	0.938609741355765	no
LOC105193120	QH	0.726924219359166	-0.156919105199937	1.54693179210804	0	0	43QH	south_america	0	0	0.10143892962863	no
LOC105193120	QH	0.726924219359166	-0.156919105199937	1.54693179210804	0	0	3QH	south_america	0	0	0.10143892962863	no
LOC105193120	QH	0.726924219359166	-0.156919105199937	1.54693179210804	0	0	111BQH	south_america	0	0	0.10143892962863	no
LOC105193120	QT	4.46172547255056	0.182227205719409	1.1287051691787	1.1678696636368	3.53856774390798	118QT	south_america	4.70643740754478	1.06595906983571	0.782960766237433	no
LOC105193120	QT	4.46172547255056	0.182227205719409	1.1287051691787	1.20923095523457	3.00778258232178	112BQT	south_america	4.21701353755635	0.859259998706135	0.599831392177789	no
LOC105193120	QT	4.46172547255056	0.182227205719409	1.1287051691787	3.57568293214522	5.9686399713501	43QT	south_america	9.54432290349532	0.606890035906095	0.376238934473643	no
LOC105193120	QT	4.46172547255056	0.182227205719409	1.1287051691787	4.15385268205238	9.02257099287129	3QT	south_america	13.1764236749237	0.959529431723635	0.688667197803152	no
LOC105193120	QT	4.46172547255056	0.182227205719409	1.1287051691787	0.705571092709727	0.691245358324816	111BQT	south_america	1.39681645103454	-0.0121689168598542	-0.172229318946697	no
LOC105193120	QT	4.46172547255056	0.182227205719409	1.1287051691787	0	0.969232292478887	114CQT	south_america	0.969232292478887	0.97763330293098	0.704706701919641	no
LOC105193120	W	2.17070060499072	0.127073279071061	1.3566622902154	0.97436008040867	3.3419806470242	104W	south_america	4.31634072743287	1.13696816558012	0.744396666578475	no
LOC105193120	W	2.17070060499072	0.127073279071061	1.3566622902154	0	2.46324824214449	43CW	south_america	2.46324824214449	1.79212580216841	1.2273154012654	no
LOC105193120	W	2.17070060499072	0.127073279071061	1.3566622902154	0.923718090804182	0	114W	south_america	0.923718090804182	-0.943897396406448	-0.789415820872763	no
LOC105193120	W	2.17070060499072	0.127073279071061	1.3566622902154	0.874636984002829	0.55384702427365	28W	south_america	1.42848400827648	-0.270766772610698	-0.29324914133096	no
LOC105193120	W	2.17070060499072	0.127073279071061	1.3566622902154	7.78579775757864	5.01297097053631	3BW	south_america	12.7987687281149	-0.547095296566402	-0.496931757077456	no
LOC105193120	W	2.17070060499072	0.127073279071061	1.3566622902154	0.64881647979822	1.22933648803873	112W	south_america	1.87815296783695	0.435183558546666	0.227109046737554	no
LOC105193124	QA	0.847691381105199	0.297259275323424	1.07755291546055	3.77847745849355	0	118QA	south_america	3.77847745849355	-2.25655101297935	-2.3700091676809	no
LOC105193124	QA	0.847691381105199	0.297259275323424	1.07755291546055	0	0	112BQA	south_america	0	0	-0.27586513020233	no
LOC105193124	QA	0.847691381105199	0.297259275323424	1.07755291546055	0	1.00259419410726	3QA	south_america	1.00259419410726	1.00187010289637	0.653899049840907	no
LOC105193124	QA	0.847691381105199	0.297259275323424	1.07755291546055	0.692788568103137	0	43QA	south_america	0.692788568103137	-0.75940178965543	-0.980611763764044	no
LOC105193124	QA	0.847691381105199	0.297259275323424	1.07755291546055	3.43491077540234	1.19047811711496	114CQA	south_america	4.6253888925173	-1.01765927747948	-1.22028211694913	no
LOC105193124	QA	0.847691381105199	0.297259275323424	1.07755291546055	0	0	111BQA	south_america	0	0	-0.27586513020233	no
LOC105193124	QH	3.63080927215659	-0.156919105199937	1.54693179210804	0	1.84743618160836	3QH	south_america	1.84743618160836	1.5096635077775	1.07734718588099	no
LOC105193124	QH	3.63080927215659	-0.156919105199937	1.54693179210804	2.50648548526815	2.90769687743666	43QH	south_america	5.41418236270482	0.156292804725876	0.202472993007011	no
LOC105193124	QH	3.63080927215659	-0.156919105199937	1.54693179210804	10.3810636767715	10.7143030540347	118QH	south_america	21.0953667308062	0.0416357246323597	0.128353965472338	no
LOC105193124	QH	3.63080927215659	-0.156919105199937	1.54693179210804	0	0	111BQH	south_america	0	0	0.10143892962863	no
LOC105193124	QH	3.63080927215659	-0.156919105199937	1.54693179210804	1.70513014071517	0	112BQH	south_america	1.70513014071517	-1.43569800212899	-0.826654997623675	no
LOC105193124	QH	3.63080927215659	-0.156919105199937	1.54693179210804	2.50648548526815	6.82052056286069	114CQH	south_america	9.32700604812884	1.15723888572552	0.849525491446927	no
LOC105193124	QT	2.17858094320446	0.182227205719409	1.1287051691787	0.715136586429044	0.852662853050014	43QT	south_america	1.56779943947906	0.111276892825549	-0.0628599166826597	no
LOC105193124	QT	2.17858094320446	0.182227205719409	1.1287051691787	1.66154107282095	1.12782137410891	3QT	south_america	2.78936244692986	-0.322884785191909	-0.447514554468518	no
LOC105193124	QT	2.17858094320446	0.182227205719409	1.1287051691787	0.235190364236576	0.691245358324816	111BQT	south_america	0.926435722561392	0.453352571438262	0.240209199995192	no
LOC105193124	QT	2.17858094320446	0.182227205719409	1.1287051691787	0	0.501297097053631	112BQT	south_america	0.501297097053631	0.586209505294724	0.357916584956613	no
LOC105193124	QT	2.17858094320446	0.182227205719409	1.1287051691787	4.08754382272879	1.76928387195399	118QT	south_america	5.85682769468278	-0.877456368285838	-0.93884887120374	no
LOC105193124	QT	2.17858094320446	0.182227205719409	1.1287051691787	8.17508764545757	0.969232292478887	114CQT	south_america	9.14431993793646	-2.22008863650313	-2.12838206807415	no
LOC105193124	W	2.22423963021979	0.127073279071061	1.3566622902154	2.32615750194933	1.23162412107224	43CW	south_america	3.55778162302157	-0.575762435176493	-0.518062394242538	no
LOC105193124	W	2.22423963021979	0.127073279071061	1.3566622902154	0	0	3BW	south_america	0	0	-0.093666109825228	no
LOC105193124	W	2.22423963021979	0.127073279071061	1.3566622902154	1.29763295959644	0.614668244019367	112W	south_america	1.91230120361581	-0.508910576249195	-0.468785680789639	no
LOC105193124	W	2.22423963021979	0.127073279071061	1.3566622902154	0.97436008040867	3.3419806470242	104W	south_america	4.31634072743287	1.13696816558012	0.744396666578475	no
LOC105193124	W	2.22423963021979	0.127073279071061	1.3566622902154	0.874636984002829	1.66154107282095	28W	south_america	2.53617805682378	0.505650579564103	0.279050507428002	no
LOC105193124	W	2.22423963021979	0.127073279071061	1.3566622902154	0	1.26050624165114	114W	south_america	1.26050624165114	1.17664590119448	0.77364324909243	no
LOC105193126	QA	0.621904372981491	0.297259275323424	1.07755291546055	0	0.528672159533939	112BQA	south_america	0.528672159533939	0.612279038138765	0.292347371804661	no
LOC105193126	QA	0.621904372981491	0.297259275323424	1.07755291546055	1.37396431016094	1.19047811711496	114CQA	south_america	2.5644424272759	-0.116052443668763	-0.383565125259336	no
LOC105193126	QA	0.621904372981491	0.297259275323424	1.07755291546055	0	0	111BQA	south_america	0	0	-0.27586513020233	no
LOC105193126	QA	0.621904372981491	0.297259275323424	1.07755291546055	0	0.715136586429044	43QA	south_america	0.715136586429044	0.778323471277037	0.446441366406592	no
LOC105193126	QA	0.621904372981491	0.297259275323424	1.07755291546055	0	0	3QA	south_america	0	0	-0.27586513020233	no
LOC105193126	QA	0.621904372981491	0.297259275323424	1.07755291546055	1.25949248616452	0.784152110180441	118QA	south_america	2.04364459634496	-0.340760140081695	-0.592100310110924	no
LOC105193126	QH	11.0336585917423	-0.156919105199937	1.54693179210804	1.36410411257214	0	111BQH	south_america	1.36410411257214	-1.24129357163393	-0.700984020088105	no
LOC105193126	QH	11.0336585917423	-0.156919105199937	1.54693179210804	3.41026028143035	0	112BQH	south_america	3.41026028143035	-2.14086380218821	-1.28250302121253	no
LOC105193126	QH	11.0336585917423	-0.156919105199937	1.54693179210804	7.51945645580446	9.09402741714759	114CQH	south_america	16.613483872952	0.244668616297262	0.259602733324102	no
LOC105193126	QH	11.0336585917423	-0.156919105199937	1.54693179210804	11.678696636368	7.14286870268977	118QH	south_america	18.8215653390577	-0.63879739946641	-0.311505844488338	no
LOC105193126	QH	11.0336585917423	-0.156919105199937	1.54693179210804	2.50648548526815	8.72309063230999	43QH	south_america	11.2295761175781	1.47138921316463	1.05260511592799	no
LOC105193126	QH	11.0336585917423	-0.156919105199937	1.54693179210804	7.14286870268977	3.69487236321673	3QH	south_america	10.8377410659065	-0.794451203501393	-0.412126831676707	no
LOC105193126	QT	0.841716694730245	0.182227205719409	1.1287051691787	0	0.852662853050014	43QT	south_america	0.852662853050014	0.889600364102586	0.626712074773164	no
LOC105193126	QT	0.841716694730245	0.182227205719409	1.1287051691787	5.83934831818398	3.53856774390798	118QT	south_america	9.37791606209196	-0.591621773999683	-0.685607721883814	no
LOC105193126	QT	0.841716694730245	0.182227205719409	1.1287051691787	0	0.345622679162408	111BQT	south_america	0.345622679162408	0.42827392613332	0.217990248589848	no
LOC105193126	QT	0.841716694730245	0.182227205719409	1.1287051691787	0.806153970156377	0	112BQT	south_america	0.806153970156377	-0.85292088424329	-0.91711114490237	no
LOC105193126	QT	0.841716694730245	0.182227205719409	1.1287051691787	10.5108269727312	5.81539375487332	114CQT	south_america	16.3262207276045	-0.756122569477854	-0.831350649240008	no
LOC105193126	QT	0.841716694730245	0.182227205719409	1.1287051691787	0.830770536410475	0	3QT	south_america	0.830770536410475	-0.872450979159287	-0.93441424180429	no
LOC105193126	W	1.86275964532277	0.127073279071061	1.3566622902154	1.46154012061301	0.835495161756051	104W	south_america	2.29703528236906	-0.423391942639959	-0.405749629573343	no
LOC105193126	W	1.86275964532277	0.127073279071061	1.3566622902154	0.64881647979822	0	112W	south_america	0.64881647979822	-0.721430829691621	-0.625435021583717	no
LOC105193126	W	1.86275964532277	0.127073279071061	1.3566622902154	0.874636984002829	0.55384702427365	28W	south_america	1.42848400827648	-0.270766772610698	-0.29324914133096	no
LOC105193126	W	1.86275964532277	0.127073279071061	1.3566622902154	0	1.26050624165114	114W	south_america	1.26050624165114	1.17664590119448	0.77364324909243	no
LOC105193126	W	1.86275964532277	0.127073279071061	1.3566622902154	1.55077166796622	2.46324824214449	43CW	south_america	4.01401991011071	0.441192040129662	0.231537917228265	no
LOC105193126	W	1.86275964532277	0.127073279071061	1.3566622902154	11.678696636368	0	3BW	south_america	11.678696636368	-3.66433453966319	-2.79465851308677	no
LOC105193132	QA	8.91230760178199	0.297259275323424	1.07755291546055	4.73517623247192	7.93008239300908	112BQA	south_america	12.665258625481	0.638835667817024	0.316992685549563	sa
LOC105193132	QA	8.91230760178199	0.297259275323424	1.07755291546055	1.37396431016094	2.38095623422992	114CQA	south_america	3.75492054439086	0.51013309509467	0.197553008039761	sa
LOC105193132	QA	8.91230760178199	0.297259275323424	1.07755291546055	3.02781023905836	10.7270487964357	111BQA	south_america	13.754859035494	1.54177237272421	1.15494383574554	sa
LOC105193132	QA	8.91230760178199	0.297259275323424	1.07755291546055	4.15673140861882	2.86054634571618	43QA	south_america	7.017277754335	-0.417651871284794	-0.663458041225442	sa
LOC105193132	QA	8.91230760178199	0.297259275323424	1.07755291546055	3.78917809047816	7.01815935875083	3QA	south_america	10.807337449229	0.743493006287917	0.414117696274593	sa
LOC105193132	QA	8.91230760178199	0.297259275323424	1.07755291546055	1.25949248616452	3.13660844072176	118QA	south_america	4.39610092688628	0.872449643332529	0.533793152759712	sa
LOC105193132	QH	5.2948790744379	-0.156919105199937	1.54693179210804	0	4.54701370857379	114CQH	south_america	4.54701370857379	2.47171129086204	1.69925423310351	sa
LOC105193132	QH	5.2948790744379	-0.156919105199937	1.54693179210804	1.36410411257214	3.41026028143035	111BQH	south_america	4.77436439400248	0.899570230554287	0.682957930753057	sa
LOC105193132	QH	5.2948790744379	-0.156919105199937	1.54693179210804	1.70513014071517	5.81539375487333	112BQH	south_america	7.5205238955885	1.33309900806259	0.963208669486354	sa
LOC105193132	QH	5.2948790744379	-0.156919105199937	1.54693179210804	0	5.81539375487332	43QH	south_america	5.81539375487332	2.76879701019158	1.89130259673866	sa
LOC105193132	QH	5.2948790744379	-0.156919105199937	1.54693179210804	0	2.38095623422992	118QH	south_america	2.38095623422992	1.75743134096713	1.23751445017388	sa
LOC105193132	QH	5.2948790744379	-0.156919105199937	1.54693179210804	3.57143435134488	3.69487236321673	3QH	south_america	7.26630671456161	0.0384390346730113	0.126287494296519	sa
LOC105193132	QT	3.4324107296067	0.182227205719409	1.1287051691787	1.43027317285809	2.55798855915004	43QT	south_america	3.98826173200813	0.549943383674982	0.325785854443408	sa
LOC105193132	QT	3.4324107296067	0.182227205719409	1.1287051691787	1.8815229138926	2.07373607497445	111BQT	south_america	3.95525898886705	0.0931618018653467	-0.0789093611743364	sa
LOC105193132	QT	3.4324107296067	0.182227205719409	1.1287051691787	0.403076985078189	2.50648548526815	112BQT	south_america	2.90956247034634	1.32143158613638	1.00930199623868	sa
LOC105193132	QT	3.4324107296067	0.182227205719409	1.1287051691787	1.1678696636368	1.17952258130266	118QT	south_america	2.34739224493946	0.00773412926361629	-0.154595798106216	sa
LOC105193132	QT	3.4324107296067	0.182227205719409	1.1287051691787	2.49231160923143	6.76692824465346	3QT	south_america	9.25923985388489	1.15316184520664	0.860219892670231	sa
LOC105193132	QT	3.4324107296067	0.182227205719409	1.1287051691787	0	0.969232292478887	114CQT	south_america	0.969232292478887	0.97763330293098	0.704706701919641	sa
LOC105193132	W	4.40121280212393	0.127073279071061	1.3566622902154	0.64881647979822	2.45867297607747	112W	south_america	3.10748945587569	1.06878778098506	0.694140692717626	sa
LOC105193132	W	4.40121280212393	0.127073279071061	1.3566622902154	1.94872016081734	8.35495161756051	104W	south_america	10.3036717783779	1.66564127770048	1.13408326429206	sa
LOC105193132	W	4.40121280212393	0.127073279071061	1.3566622902154	0	5.04202496660454	114W	south_america	5.04202496660454	2.59503214552268	1.8191401679336	sa
LOC105193132	W	4.40121280212393	0.127073279071061	1.3566622902154	1.55077166796622	4.92649648428897	43CW	south_america	6.47726815225519	1.21624572916396	0.802832405638676	sa
LOC105193132	W	4.40121280212393	0.127073279071061	1.3566622902154	0.437318492001414	3.3230821456419	28W	south_america	3.76040063764331	1.58868046946558	1.07735521281605	sa
LOC105193132	W	4.40121280212393	0.127073279071061	1.3566622902154	0	2.50648548526815	3BW	south_america	2.50648548526815	1.81002575613728	1.24050951309262	sa
LOC105193134	QA	37.8809927150051	0.297259275323424	1.07755291546055	14.4841635908919	30.5819322970372	118QA	south_america	45.0660958879292	1.02830598824593	0.678432309386915	sa
LOC105193134	QA	37.8809927150051	0.297259275323424	1.07755291546055	0.686982155080468	1.19047811711496	114CQA	south_america	1.87746027219543	0.376801089344715	0.0738170839501603	sa
LOC105193134	QA	37.8809927150051	0.297259275323424	1.07755291546055	3.46394284051568	32.896282975736	43QA	south_america	36.3602258162517	2.92473661878068	2.43837430696782	sa
LOC105193134	QA	37.8809927150051	0.297259275323424	1.07755291546055	8.6508863973096	30.7508732164489	111BQA	south_america	39.4017596137585	1.71806290996202	1.31854650871725	sa
LOC105193134	QA	37.8809927150051	0.297259275323424	1.07755291546055	5.30484932666942	42.108956152505	3QA	south_america	47.4138054791744	2.77345383073709	2.29797954224396	sa
LOC105193134	QA	37.8809927150051	0.297259275323424	1.07755291546055	3.87423509929521	16.917509105086	112BQA	south_america	20.7917442043812	1.87812234419068	1.46708625273552	sa
LOC105193134	QH	44.0694388871971	-0.156919105199937	1.54693179210804	17.0513014071517	31.9846656518033	112BQH	south_america	49.035967058955	0.869692629300594	0.663643826921124	sa
LOC105193134	QH	44.0694388871971	-0.156919105199937	1.54693179210804	20.762127353543	33.3333872792189	118QH	south_america	54.095514632762	0.657792604469788	0.526662981410124	sa
LOC105193134	QH	44.0694388871971	-0.156919105199937	1.54693179210804	14.2857374053795	16.6269256344753	3QH	south_america	30.9126630398548	0.20559472025128	0.234343768290657	sa
LOC105193134	QH	44.0694388871971	-0.156919105199937	1.54693179210804	19.0974575760099	40.9231233771641	111BQH	south_america	60.0205809531741	1.06073320009375	0.78714026791987	sa
LOC105193134	QH	44.0694388871971	-0.156919105199937	1.54693179210804	10.0259419410726	29.0769687743666	43QH	south_america	39.1029107154392	1.44775726642786	1.0373284587041	sa
LOC105193134	QH	44.0694388871971	-0.156919105199937	1.54693179210804	10.0259419410726	9.09402741714759	114CQH	south_america	19.1199693582202	-0.127399999444582	0.0190823576746901	sa
LOC105193134	QT	50.8210779502864	0.182227205719409	1.1287051691787	12.0923095523457	30.0778258232178	112BQT	south_america	42.1701353755635	1.24716595889129	0.943504807324289	sa
LOC105193134	QT	50.8210779502864	0.182227205719409	1.1287051691787	21.0216539454623	32.9538979442822	114CQT	south_america	53.9755518897445	0.624654379750333	0.391977627206984	sa
LOC105193134	QT	50.8210779502864	0.182227205719409	1.1287051691787	3.76304582778521	15.5530205623084	111BQT	south_america	19.3160663900936	1.79713816636602	1.43076421083612	sa
LOC105193134	QT	50.8210779502864	0.182227205719409	1.1287051691787	4.98462321846285	49.6241404607921	3QT	south_america	54.6087636792549	3.08049318224998	2.5677794836711	sa
LOC105193134	QT	50.8210779502864	0.182227205719409	1.1287051691787	27.4449370954647	61.9249355183897	118QT	south_america	89.3698726138544	1.1454599424124	0.853396230473447	sa
LOC105193134	QT	50.8210779502864	0.182227205719409	1.1287051691787	9.29677562357758	38.3698283872506	43QT	south_america	47.6666040108282	1.9348977873911	1.55281523424493	sa
LOC105193134	W	42.32720289113	0.127073279071061	1.3566622902154	8.31346281723764	30.2521497996272	114W	south_america	38.5656126168649	1.74656585675574	1.19373302358655	sa
LOC105193134	W	42.32720289113	0.127073279071061	1.3566622902154	0	15.0389129116089	3BW	south_america	15.0389129116089	4.00350445674384	2.85732949580055	sa
LOC105193134	W	42.32720289113	0.127073279071061	1.3566622902154	11.8075992840382	42.0923738447974	28W	south_america	53.8999731288356	1.75043249933329	1.19658313787471	sa
LOC105193134	W	42.32720289113	0.127073279071061	1.3566622902154	9.30463000779732	72.6658231432623	43CW	south_america	81.9704531510597	2.83770273882843	1.99801341815656	sa
LOC105193134	W	42.32720289113	0.127073279071061	1.3566622902154	5.83934831818398	22.7427250287166	112W	south_america	28.5820733469005	1.79555475648735	1.22984289417478	sa
LOC105193134	W	42.32720289113	0.127073279071061	1.3566622902154	6.82052056286069	39.2682726025344	104W	south_america	46.0887931653951	2.36430703901052	1.64907197323533	sa
LOC105193135	QA	11.3481359892934	0.297259275323424	1.07755291546055	8.6508863973096	2.86054634571618	111BQA	south_america	11.5114327430258	-1.32185642194202	-1.50258578862778	sa
LOC105193135	QA	11.3481359892934	0.297259275323424	1.07755291546055	7.74847019859042	3.4363690369706	112BQA	south_america	11.184839235561	-0.979651381801652	-1.1850097000381	sa
LOC105193135	QA	11.3481359892934	0.297259275323424	1.07755291546055	5.54230854482509	11.4421853828647	43QA	south_america	16.9844939276898	0.927368201278618	0.584759149100242	sa
LOC105193135	QA	11.3481359892934	0.297259275323424	1.07755291546055	13.8544173478097	3.13660844072176	118QA	south_america	16.9910257885315	-1.84437170991979	-1.98749495687447	sa
LOC105193135	QA	11.3481359892934	0.297259275323424	1.07755291546055	6.82052056286069	2.00518838821452	3QA	south_america	8.82570895107521	-1.37980920892173	-1.5563676365057	sa
LOC105193135	QA	11.3481359892934	0.297259275323424	1.07755291546055	4.80887508556328	2.38095623422992	114CQA	south_america	7.1898313197932	-0.780827465414677	-1.00049540516284	sa
LOC105193135	QH	13.9905090721933	-0.156919105199937	1.54693179210804	6.82052056286069	6.82052056286069	111BQH	south_america	13.6410411257214	-1.60171325190746e-16	0.101438929628629	sa
LOC105193135	QH	13.9905090721933	-0.156919105199937	1.54693179210804	7.51945645580446	6.82052056286069	114CQH	south_america	14.3399770186651	-0.123496747094188	0.0216055796876496	sa
LOC105193135	QH	13.9905090721933	-0.156919105199937	1.54693179210804	10.0259419410726	20.3538781420566	43QH	south_america	30.3798200831292	0.953596196016595	0.717882525190854	sa
LOC105193135	QH	13.9905090721933	-0.156919105199937	1.54693179210804	9.08343071717508	2.38095623422992	118QH	south_america	11.464386951405	-1.57648332892586	-0.917664392811688	sa
LOC105193135	QH	13.9905090721933	-0.156919105199937	1.54693179210804	6.82052056286069	2.90769687743666	112BQH	south_america	9.72821744029735	-1.00094608099964	-0.545613568811287	sa
LOC105193135	QH	13.9905090721933	-0.156919105199937	1.54693179210804	7.14286870268977	7.38974472643346	3QH	south_america	14.5326134291232	0.0430897744598224	0.129293922770314	sa
LOC105193135	QT	19.6427379533105	0.182227205719409	1.1287051691787	6.82052056286069	3.11060411246167	111BQT	south_america	9.93112467532236	-0.927914207565073	-0.983553051406929	sa
LOC105193135	QT	19.6427379533105	0.182227205719409	1.1287051691787	4.98462321846285	19.1729633598515	3QT	south_america	24.1575865783143	1.75309070240013	1.39173943699022	sa
LOC105193135	QT	19.6427379533105	0.182227205719409	1.1287051691787	10.0119122100066	5.11597711830009	43QT	south_america	15.1278893283067	-0.848410099262484	-0.91311472041174	sa
LOC105193135	QT	19.6427379533105	0.182227205719409	1.1287051691787	21.0216539454623	4.12832903455931	118QT	south_america	25.1499829800216	-2.10236209355636	-2.02407977004141	sa
LOC105193135	QT	19.6427379533105	0.182227205719409	1.1287051691787	8.06153970156377	4.51167387348268	112BQT	south_america	12.5732135750464	-0.717265682128057	-0.796924575531076	sa
LOC105193135	QT	19.6427379533105	0.182227205719409	1.1287051691787	21.0216539454623	15.5077166796622	114CQT	south_america	36.5293706251245	-0.415782244346267	-0.529819005348241	sa
LOC105193135	W	11.2538122705931	0.127073279071061	1.3566622902154	11.8075992840382	2.2153880970946	28W	south_america	14.0229873811328	-1.9939352891992	-1.56340202242484	sa
LOC105193135	W	11.2538122705931	0.127073279071061	1.3566622902154	9.30463000779732	4.92649648428897	43CW	south_america	14.2311264920863	-0.798041308901581	-0.6819048444442	sa
LOC105193135	W	11.2538122705931	0.127073279071061	1.3566622902154	11.0846170896502	1.26050624165114	114W	south_america	12.3451233313013	-2.41845395462305	-1.8763160530466	sa
LOC105193135	W	11.2538122705931	0.127073279071061	1.3566622902154	3.89289887878932	5.01297097053631	3BW	south_america	8.90586984932563	0.297388526499415	0.12553989939627	sa
LOC105193135	W	11.2538122705931	0.127073279071061	1.3566622902154	6.82052056286069	3.3419806470242	104W	south_america	10.1625012098849	-0.848911346242403	-0.719401307423757	sa
LOC105193135	W	11.2538122705931	0.127073279071061	1.3566622902154	5.83934831818398	1.8440047320581	112W	south_america	7.68335305024208	-1.26593500020237	-1.0267907417492	sa
LOC105193139	QA	0.323371363260548	0.297259275323424	1.07755291546055	0.21627215993274	0	111BQA	south_america	0.21627215993274	-0.282466090501827	-0.538001760755736	no
LOC105193139	QA	0.323371363260548	0.297259275323424	1.07755291546055	0.430470566588357	0	112BQA	south_america	0.430470566588357	-0.516489813023644	-0.755182484935574	no
LOC105193139	QA	0.323371363260548	0.297259275323424	1.07755291546055	0	0	3QA	south_america	0	0	-0.27586513020233	no
LOC105193139	QA	0.323371363260548	0.297259275323424	1.07755291546055	0	0	43QA	south_america	0	0	-0.27586513020233	no
LOC105193139	QA	0.323371363260548	0.297259275323424	1.07755291546055	0	1.19047811711496	114CQA	south_america	1.19047811711496	1.1312458022037	0.773963408120731	no
LOC105193139	QA	0.323371363260548	0.297259275323424	1.07755291546055	0	0.784152110180441	118QA	south_america	0.784152110180441	0.83523861932102	0.499260255602077	no
LOC105193139	QH	3.23956561439077	-0.156919105199937	1.54693179210804	0	2.90769687743666	112BQH	south_america	2.90769687743666	1.96631856086315	1.37254769531222	no
LOC105193139	QH	3.23956561439077	-0.156919105199937	1.54693179210804	1.36410411257214	0	111BQH	south_america	1.36410411257214	-1.24129357163393	-0.700984020088105	no
LOC105193139	QH	3.23956561439077	-0.156919105199937	1.54693179210804	2.50648548526815	14.5384843871833	43QH	south_america	17.0449698724515	2.14774812990052	1.48983119156136	no
LOC105193139	QH	3.23956561439077	-0.156919105199937	1.54693179210804	3.57143435134488	0	3QH	south_america	3.57143435134488	-2.19264690202237	-1.31597773554599	no
LOC105193139	QH	3.23956561439077	-0.156919105199937	1.54693179210804	0	4.54701370857379	114CQH	south_america	4.54701370857379	2.47171129086204	1.69925423310351	no
LOC105193139	QH	3.23956561439077	-0.156919105199937	1.54693179210804	1.29763295959644	0	118QH	south_america	1.29763295959644	-1.20014834991483	-0.674386065395461	no
LOC105193139	QT	0.583934831818398	0.182227205719409	1.1287051691787	0	1.17952258130266	118QT	south_america	1.17952258130266	1.12401215104892	0.834394110212855	no
LOC105193139	QT	0.583934831818398	0.182227205719409	1.1287051691787	0	0	112BQT	south_america	0	0	-0.161448012018946	no
LOC105193139	QT	0.583934831818398	0.182227205719409	1.1287051691787	0	0	43QT	south_america	0	0	-0.161448012018946	no
LOC105193139	QT	0.583934831818398	0.182227205719409	1.1287051691787	1.1678696636368	0	114CQT	south_america	1.1678696636368	-1.1162780217853	-1.15043792033802	no
LOC105193139	QT	0.583934831818398	0.182227205719409	1.1287051691787	0	0	111BQT	south_america	0	0	-0.161448012018946	no
LOC105193139	QT	0.583934831818398	0.182227205719409	1.1287051691787	1.66154107282095	0	3QT	south_america	1.66154107282095	-1.41226183006121	-1.41267097849906	no
LOC105193139	W	0.417747580878025	0.127073279071061	1.3566622902154	0	0	114W	south_america	0	0	-0.093666109825228	no
LOC105193139	W	0.417747580878025	0.127073279071061	1.3566622902154	0	1.23162412107224	43CW	south_america	1.23162412107224	1.15809405031617	0.759968622022668	no
LOC105193139	W	0.417747580878025	0.127073279071061	1.3566622902154	0	1.1076940485473	28W	south_america	1.1076940485473	1.07566546153002	0.69921025247068	no
LOC105193139	W	0.417747580878025	0.127073279071061	1.3566622902154	0	0.835495161756051	104W	south_america	0.835495161756051	0.876169311593684	0.552161018939864	no
LOC105193139	W	0.417747580878025	0.127073279071061	1.3566622902154	0	0	112W	south_america	0	0	-0.093666109825228	no
LOC105193139	W	0.417747580878025	0.127073279071061	1.3566622902154	0	0	3BW	south_america	0	0	-0.093666109825228	no
LOC105193215	QA	8.20643805145353	0.297259275323424	1.07755291546055	0.21627215993274	0.357568293214522	111BQA	south_america	0.573840453147262	0.15855868491541	-0.128718124574638	no
LOC105193215	QA	8.20643805145353	0.297259275323424	1.07755291546055	6.45705849882535	7.13707415370817	112BQA	south_america	13.5941326525335	0.125903478972637	-0.159023091944909	no
LOC105193215	QA	8.20643805145353	0.297259275323424	1.07755291546055	9.09402741714758	15.0389129116089	3QA	south_america	24.1329403287565	0.668074451489595	0.344127115101057	no
LOC105193215	QA	8.20643805145353	0.297259275323424	1.07755291546055	2.74792862032187	4.76191246845985	114CQA	south_america	7.50984108878172	0.620454267114675	0.299934218685787	no
LOC105193215	QA	8.20643805145353	0.297259275323424	1.07755291546055	7.6206742491345	0	43QA	south_america	7.6206742491345	-3.10780071129133	-3.15999329384157	no
LOC105193215	QA	8.20643805145353	0.297259275323424	1.07755291546055	2.51898497232903	6.27321688144353	118QA	south_america	8.79220185377256	1.04743424380532	0.696183878971057	no
LOC105193215	QH	1.53461712664366	-0.156919105199937	1.54693179210804	17.8571717567244	0	3QH	south_america	17.8571717567244	-4.23704140830659	-2.63755798666894	no
LOC105193215	QH	1.53461712664366	-0.156919105199937	1.54693179210804	0	4.54701370857379	114CQH	south_america	4.54701370857379	2.47171129086204	1.69925423310351	no
LOC105193215	QH	1.53461712664366	-0.156919105199937	1.54693179210804	0	0	43QH	south_america	0	0	0.10143892962863	no
LOC105193215	QH	1.53461712664366	-0.156919105199937	1.54693179210804	1.36410411257214	0	111BQH	south_america	1.36410411257214	-1.24129357163393	-0.700984020088105	no
LOC105193215	QH	1.53461712664366	-0.156919105199937	1.54693179210804	1.70513014071517	0	112BQH	south_america	1.70513014071517	-1.43569800212899	-0.826654997623675	no
LOC105193215	QH	1.53461712664366	-0.156919105199937	1.54693179210804	0	0	118QH	south_america	0	0	0.10143892962863	no
LOC105193215	QT	5.0022608095217	0.182227205719409	1.1287051691787	2.33573932727359	4.84616146239444	114CQT	south_america	7.18190078966803	0.809483121624597	0.555730524705234	no
LOC105193215	QT	5.0022608095217	0.182227205719409	1.1287051691787	2.41846191046913	4.01037677642905	112BQT	south_america	6.42883868689818	0.55157174657083	0.327228536678161	no
LOC105193215	QT	5.0022608095217	0.182227205719409	1.1287051691787	0.830770536410475	0	3QT	south_america	0.830770536410475	-0.872450979159287	-0.93441424180429	no
LOC105193215	QT	5.0022608095217	0.182227205719409	1.1287051691787	5.25541348636558	4.71809032521064	118QT	south_america	9.97350381157622	-0.129571840971256	-0.276244900089848	no
LOC105193215	QT	5.0022608095217	0.182227205719409	1.1287051691787	3.57568293214522	0	43QT	south_america	3.57568293214522	-2.19398708531778	-2.10525685176603	no
LOC105193215	QT	5.0022608095217	0.182227205719409	1.1287051691787	0.235190364236576	0.345622679162408	111BQT	south_america	0.580813043398984	0.123540522885487	-0.0519946966102985	no
LOC105193215	W	9.6428198167403	0.127073279071061	1.3566622902154	1.84743618160836	2.52101248330227	114W	south_america	4.36844866491063	0.306326834324526	0.132128353936193	no
LOC105193215	W	9.6428198167403	0.127073279071061	1.3566622902154	27.2502921515252	5.01297097053631	3BW	south_america	32.2632631220616	-2.23211588868326	-1.7389656842159	no
LOC105193215	W	9.6428198167403	0.127073279071061	1.3566622902154	18.6092600155946	0	43CW	south_america	18.6092600155946	-4.29346318921524	-3.25839120035131	no
LOC105193215	W	9.6428198167403	0.127073279071061	1.3566622902154	1.94644943939466	2.45867297607747	112W	south_america	4.40512241547213	0.231241100692973	0.0767824257910005	no
LOC105193215	W	9.6428198167403	0.127073279071061	1.3566622902154	5.24782190401697	4.4307761941892	28W	south_america	9.67859809820617	-0.202194919535285	-0.242704614833857	no
LOC105193215	W	9.6428198167403	0.127073279071061	1.3566622902154	2.92308024122601	6.68396129404841	104W	south_america	9.60704153527442	0.969863407756365	0.621223229070144	no
LOC105193220	QA	136.038367661415	0.297259275323424	1.07755291546055	46.2822422256064	276.400290654826	111BQA	south_america	322.682532880432	2.55259894133945	2.09301987276615	no
LOC105193220	QA	136.038367661415	0.297259275323424	1.07755291546055	40.8745255180851	86.5315269579144	43QA	south_america	127.406052475999	1.06372989470055	0.711306710213423	no
LOC105193220	QA	136.038367661415	0.297259275323424	1.07755291546055	38.3118804263638	82.7371929670614	112BQA	south_america	121.049073393425	1.090903182334	0.736524300220909	no
LOC105193220	QA	136.038367661415	0.297259275323424	1.07755291546055	70.4787124828938	74.1919703639373	3QA	south_america	144.670682846831	0.0730649589891575	-0.208058753419498	no
LOC105193220	QA	136.038367661415	0.297259275323424	1.07755291546055	57.0195188716789	40.4762559819087	114CQA	south_america	97.4957748535876	-0.484252662538883	-0.72526548501638	no
LOC105193220	QA	136.038367661415	0.297259275323424	1.07755291546055	53.528430661992	93.3141011114725	118QA	south_america	146.842531773464	0.790464852545276	0.457708916328304	no
LOC105193220	QH	29.224400530702	-0.156919105199937	1.54693179210804	17.0513014071517	49.4308469164233	112BQH	south_america	66.482148323575	1.48220360172218	1.05959597914039	no
LOC105193220	QH	29.224400530702	-0.156919105199937	1.54693179210804	10.0259419410726	14.5384843871833	43QH	south_america	24.5644263282559	0.494943881338973	0.421390904152666	no
LOC105193220	QH	29.224400530702	-0.156919105199937	1.54693179210804	11.678696636368	17.8571717567244	118QH	south_america	29.5358683930924	0.572706868643399	0.471660080661384	no
LOC105193220	QH	29.224400530702	-0.156919105199937	1.54693179210804	14.2857374053795	7.38974472643346	3QH	south_america	21.675482131813	-0.865487331763654	-0.458047491284755	no
LOC105193220	QH	29.224400530702	-0.156919105199937	1.54693179210804	17.5453983968771	11.3675342714345	114CQH	south_america	28.9129326683116	-0.58450336318243	-0.276407958103838	no
LOC105193220	QH	29.224400530702	-0.156919105199937	1.54693179210804	27.2820822514428	104.012938583626	111BQH	south_america	131.295020835068	1.89260684573464	1.32489742688761	no
LOC105193220	QT	21.4735046094625	0.182227205719409	1.1287051691787	2.33573932727359	1.93846458495777	114CQT	south_america	4.27420391223137	-0.182944042444723	-0.323531120558124	no
LOC105193220	QT	21.4735046094625	0.182227205719409	1.1287051691787	35.2785546354863	156.567073660571	111BQT	south_america	191.845628296057	2.11877720636062	1.71572705921985	no
LOC105193220	QT	21.4735046094625	0.182227205719409	1.1287051691787	7.15136586429044	11.9372799427002	43QT	south_america	19.0886458069906	0.666420596743077	0.42898128248672	no
LOC105193220	QT	21.4735046094625	0.182227205719409	1.1287051691787	7.00721798182078	13.5645096849806	118QT	south_america	20.5717276668014	0.863084147313668	0.603219476783015	no
LOC105193220	QT	21.4735046094625	0.182227205719409	1.1287051691787	9.9692464369257	12.406035115198	3QT	south_america	22.3752815521237	0.289418198723277	0.0949681067571133	no
LOC105193220	QT	21.4735046094625	0.182227205719409	1.1287051691787	17.3323103583621	47.1219271230413	112BQT	south_america	64.4542374814034	1.39230580354982	1.07209449453565	no
LOC105193220	W	54.5126552561941	0.127073279071061	1.3566622902154	34.9854793601131	125.723274510119	28W	south_america	160.708753870232	1.81619473839674	1.2450566891319	no
LOC105193220	W	54.5126552561941	0.127073279071061	1.3566622902154	31.7908191933075	32.0222271478783	43CW	south_america	63.8130463411858	0.0101454803532124	-0.0861878446546073	no
LOC105193220	W	54.5126552561941	0.127073279071061	1.3566622902154	18.1668614343502	27.0454027368521	112W	south_america	45.2122641712023	0.549150184891141	0.311114202011959	no
LOC105193220	W	54.5126552561941	0.127073279071061	1.3566622902154	9.23718090804182	27.731137316325	114W	south_america	36.9683182243668	1.48879661889599	1.0037305154319	no
LOC105193220	W	54.5126552561941	0.127073279071061	1.3566622902154	54.5005843030505	35.0907967937541	3BW	south_america	89.5913810968046	-0.62087196539745	-0.551312769480576	no
LOC105193220	W	54.5126552561941	0.127073279071061	1.3566622902154	0	16.709903235121	104W	south_america	16.709903235121	4.14648442427858	2.96272047524027	no
LOC105193222	QA	3.65947655711836	0.297259275323424	1.07755291546055	0.430470566588357	0.528672159533939	112BQA	south_america	0.959142726122295	0.0957892251151211	-0.186969982928583	no
LOC105193222	QA	3.65947655711836	0.297259275323424	1.07755291546055	0.692788568103137	2.86054634571618	43QA	south_america	3.55333491381931	1.18940324293607	0.827935180548735	no
LOC105193222	QA	3.65947655711836	0.297259275323424	1.07755291546055	0.43254431986548	2.14540975928713	111BQA	south_america	2.57795407915261	1.13466819875028	0.777139490239275	no
LOC105193222	QA	3.65947655711836	0.297259275323424	1.07755291546055	3.43491077540234	4.76191246845985	114CQA	south_america	8.19682324386219	0.377642664417856	0.074598089746781	no
LOC105193222	QA	3.65947655711836	0.297259275323424	1.07755291546055	0.757835618095632	3.00778258232178	3QA	south_america	3.76561820041742	1.18900408119913	0.827564747012512	no
LOC105193222	QA	3.65947655711836	0.297259275323424	1.07755291546055	2.51898497232903	1.56830422036088	118QA	south_america	4.08728919268992	-0.454343250670397	-0.697508693271537	no
LOC105193222	QH	1.77628316116177	-0.156919105199937	1.54693179210804	1.29763295959644	0	118QH	south_america	1.29763295959644	-1.20014834991483	-0.674386065395461	no
LOC105193222	QH	1.77628316116177	-0.156919105199937	1.54693179210804	0	1.84743618160836	3QH	south_america	1.84743618160836	1.5096635077775	1.07734718588099	no
LOC105193222	QH	1.77628316116177	-0.156919105199937	1.54693179210804	0	5.81539375487332	43QH	south_america	5.81539375487332	2.76879701019158	1.89130259673866	no
LOC105193222	QH	1.77628316116177	-0.156919105199937	1.54693179210804	0	0	111BQH	south_america	0	0	0.10143892962863	no
LOC105193222	QH	1.77628316116177	-0.156919105199937	1.54693179210804	1.70513014071517	0	112BQH	south_america	1.70513014071517	-1.43569800212899	-0.826654997623675	no
LOC105193222	QH	1.77628316116177	-0.156919105199937	1.54693179210804	5.01297097053631	4.54701370857379	114CQH	south_america	9.5599846791101	-0.116366702635454	0.0262147321371041	no
LOC105193222	QT	2.62728962517689	0.182227205719409	1.1287051691787	1.43027317285809	0.852662853050014	43QT	south_america	2.2829360259081	-0.391518123793206	-0.50832169921761	no
LOC105193222	QT	2.62728962517689	0.182227205719409	1.1287051691787	1.75180449545519	1.17952258130266	118QT	south_america	2.93132707675785	-0.336365825002575	-0.45945836422397	no
LOC105193222	QT	2.62728962517689	0.182227205719409	1.1287051691787	2.49231160923143	2.25564274821782	3QT	south_america	4.74795435744925	-0.101239895482751	-0.251143619204318	no
LOC105193222	QT	2.62728962517689	0.182227205719409	1.1287051691787	2.33573932727359	0.969232292478887	114CQT	south_america	3.30497161975248	-0.760373250257045	-0.835116628961961	no
LOC105193222	QT	2.62728962517689	0.182227205719409	1.1287051691787	0.940761456946302	1.38249071664963	111BQT	south_america	2.32325217359593	0.295847788419336	0.100664536499468	no
LOC105193222	QT	2.62728962517689	0.182227205719409	1.1287051691787	1.20923095523457	1.00259419410726	112BQT	south_america	2.21182514934183	-0.141674144477005	-0.286967189520449	no
LOC105193222	W	4.83264298721748	0.127073279071061	1.3566622902154	4.65231500389866	0	43CW	south_america	4.65231500389866	-2.49884186940484	-1.93557023543345	no
LOC105193222	W	4.83264298721748	0.127073279071061	1.3566622902154	2.77115427241255	1.26050624165114	114W	south_america	4.03166051406368	-0.738360269039011	-0.637913764060375	no
LOC105193222	W	4.83264298721748	0.127073279071061	1.3566622902154	6.55977738002122	1.66154107282095	28W	south_america	8.22131845284217	-1.50608192059303	-1.20380378480543	no
LOC105193222	W	4.83264298721748	0.127073279071061	1.3566622902154	0	5.01297097053631	3BW	south_america	5.01297097053631	2.58807799349749	1.81401424081427	no
LOC105193222	W	4.83264298721748	0.127073279071061	1.3566622902154	2.43590020102168	5.0129709705363	104W	south_america	7.44887117155798	0.807389860857583	0.50146347156042	no
LOC105193222	W	4.83264298721748	0.127073279071061	1.3566622902154	2.59526591919288	1.8440047320581	112W	south_america	4.43927065125098	-0.338174616265099	-0.34293567285805	no
LOC105193225	QA	0.423009201507499	0.297259275323424	1.07755291546055	0	0	43QA	south_america	0	0	-0.27586513020233	sa
LOC105193225	QA	0.423009201507499	0.297259275323424	1.07755291546055	0.21627215993274	0	111BQA	south_america	0.21627215993274	-0.282466090501827	-0.538001760755736	sa
LOC105193225	QA	0.423009201507499	0.297259275323424	1.07755291546055	0.757835618095632	0	3QA	south_america	0.757835618095632	-0.813800164880386	-1.03109501562524	sa
LOC105193225	QA	0.423009201507499	0.297259275323424	1.07755291546055	0.215235283294178	0	112BQA	south_america	0.215235283294178	-0.281235662950139	-0.536859888710258	sa
LOC105193225	QA	0.423009201507499	0.297259275323424	1.07755291546055	0.629746243082259	0	118QA	south_america	0.629746243082259	-0.70464734951994	-0.929798073457162	sa
LOC105193225	QA	0.423009201507499	0.297259275323424	1.07755291546055	0.686982155080468	0	114CQA	south_america	0.686982155080468	-0.754444712858984	-0.976011454372901	sa
LOC105193225	QH	2.10580781299166	-0.156919105199937	1.54693179210804	1.29763295959644	0	118QH	south_america	1.29763295959644	-1.20014834991483	-0.674386065395461	sa
LOC105193225	QH	2.10580781299166	-0.156919105199937	1.54693179210804	3.57143435134488	0	3QH	south_america	3.57143435134488	-2.19264690202237	-1.31597773554599	sa
LOC105193225	QH	2.10580781299166	-0.156919105199937	1.54693179210804	2.50648548526815	0	114CQH	south_america	2.50648548526815	-1.81002575613728	-1.06863577267658	sa
LOC105193225	QH	2.10580781299166	-0.156919105199937	1.54693179210804	5.01297097053631	0	43QH	south_america	5.01297097053631	-2.58807799349749	-1.57160057133777	sa
LOC105193225	QH	2.10580781299166	-0.156919105199937	1.54693179210804	0	1.70513014071517	111BQH	south_america	1.70513014071517	1.43569800212899	1.02953285688093	sa
LOC105193225	QH	2.10580781299166	-0.156919105199937	1.54693179210804	0	1.45384843871833	112BQH	south_america	1.45384843871833	1.2950461440856	0.938609741355765	sa
LOC105193225	QT	0.649535709123721	0.182227205719409	1.1287051691787	0.830770536410475	0	3QT	south_america	0.830770536410475	-0.872450979159287	-0.93441424180429	sa
LOC105193225	QT	0.649535709123721	0.182227205719409	1.1287051691787	0	0	112BQT	south_america	0	0	-0.161448012018946	sa
LOC105193225	QT	0.649535709123721	0.182227205719409	1.1287051691787	3.50360899091039	0	114CQT	south_america	3.50360899091039	-2.17108157622763	-2.0849632359347	sa
LOC105193225	QT	0.649535709123721	0.182227205719409	1.1287051691787	0.583934831818398	0	118QT	south_america	0.583934831818398	-0.66351297951696	-0.749301242105386	sa
LOC105193225	QT	0.649535709123721	0.182227205719409	1.1287051691787	0.715136586429044	0	43QT	south_america	0.715136586429044	-0.778323471277037	-0.85102000347477	sa
LOC105193225	QT	0.649535709123721	0.182227205719409	1.1287051691787	0	0	111BQT	south_america	0	0	-0.161448012018946	sa
LOC105193225	W	0.712101156890665	0.127073279071061	1.3566622902154	0.487180040204335	0	104W	south_america	0.487180040204335	-0.572579312748018	-0.515716104785366	sa
LOC105193225	W	0.712101156890665	0.127073279071061	1.3566622902154	0.437318492001414	0	28W	south_america	0.437318492001414	-0.523379780597576	-0.479450976385114	sa
LOC105193225	W	0.712101156890665	0.127073279071061	1.3566622902154	3.89289887878932	0	3BW	south_america	3.89289887878932	-2.29068946699808	-1.78214045124323	sa
LOC105193225	W	0.712101156890665	0.127073279071061	1.3566622902154	2.77115427241255	0	114W	south_america	2.77115427241255	-1.91500617023349	-1.50522312297803	sa
LOC105193225	W	0.712101156890665	0.127073279071061	1.3566622902154	0.64881647979822	0	112W	south_america	0.64881647979822	-0.721430829691621	-0.625435021583717	sa
LOC105193225	W	0.712101156890665	0.127073279071061	1.3566622902154	0.77538583398311	0	43CW	south_america	0.77538583398311	-0.828132590974476	-0.704085222191795	sa
LOC105193227	QA	0.738470339141789	0.297259275323424	1.07755291546055	0	1.07270487964357	111BQA	south_america	1.07270487964357	1.05151471413927	0.699970672431871	no
LOC105193227	QA	0.738470339141789	0.297259275323424	1.07755291546055	0	0.784152110180441	118QA	south_america	0.784152110180441	0.83523861932102	0.499260255602077	no
LOC105193227	QA	0.738470339141789	0.297259275323424	1.07755291546055	0	1.19047811711496	114CQA	south_america	1.19047811711496	1.1312458022037	0.773963408120731	no
LOC105193227	QA	0.738470339141789	0.297259275323424	1.07755291546055	0.692788568103137	0	43QA	south_america	0.692788568103137	-0.75940178965543	-0.980611763764044	no
LOC105193227	QA	0.738470339141789	0.297259275323424	1.07755291546055	0.215235283294178	0.264336079766969	112BQA	south_america	0.479571363061148	0.0571443418352689	-0.222833542597331	no
LOC105193227	QA	0.738470339141789	0.297259275323424	1.07755291546055	0	0	3QA	south_america	0	0	-0.27586513020233	no
LOC105193227	QH	1.98931849750103	-0.156919105199937	1.54693179210804	0	1.70513014071517	111BQH	south_america	1.70513014071517	1.43569800212899	1.02953285688093	no
LOC105193227	QH	1.98931849750103	-0.156919105199937	1.54693179210804	0	2.2735068542869	114CQH	south_america	2.2735068542869	1.71083699974066	1.20739396169198	no
LOC105193227	QH	1.98931849750103	-0.156919105199937	1.54693179210804	3.57143435134488	0	3QH	south_america	3.57143435134488	-2.19264690202237	-1.31597773554599	no
LOC105193227	QH	1.98931849750103	-0.156919105199937	1.54693179210804	0	0	112BQH	south_america	0	0	0.10143892962863	no
LOC105193227	QH	1.98931849750103	-0.156919105199937	1.54693179210804	1.29763295959644	0	118QH	south_america	1.29763295959644	-1.20014834991483	-0.674386065395461	no
LOC105193227	QH	1.98931849750103	-0.156919105199937	1.54693179210804	2.50648548526815	0	43QH	south_america	2.50648548526815	-1.81002575613728	-1.06863577267658	no
LOC105193227	QT	0.649535709123721	0.182227205719409	1.1287051691787	0	0	112BQT	south_america	0	0	-0.161448012018946	no
LOC105193227	QT	0.649535709123721	0.182227205719409	1.1287051691787	0.715136586429044	0	43QT	south_america	0.715136586429044	-0.778323471277037	-0.85102000347477	no
LOC105193227	QT	0.649535709123721	0.182227205719409	1.1287051691787	0	0.345622679162408	111BQT	south_america	0.345622679162408	0.42827392613332	0.217990248589848	no
LOC105193227	QT	0.649535709123721	0.182227205719409	1.1287051691787	0.830770536410475	0	3QT	south_america	0.830770536410475	-0.872450979159287	-0.93441424180429	no
LOC105193227	QT	0.649535709123721	0.182227205719409	1.1287051691787	0.583934831818398	0	118QT	south_america	0.583934831818398	-0.66351297951696	-0.749301242105386	no
LOC105193227	QT	0.649535709123721	0.182227205719409	1.1287051691787	0	0.969232292478887	114CQT	south_america	0.969232292478887	0.97763330293098	0.704706701919641	no
LOC105193227	W	0.712101156890665	0.127073279071061	1.3566622902154	1.84743618160836	0	114W	south_america	1.84743618160836	-1.5096635077775	-1.20644378387542	no
LOC105193227	W	0.712101156890665	0.127073279071061	1.3566622902154	15.5715955151573	0	3BW	south_america	15.5715955151573	-4.05064060698147	-3.07940591861608	no
LOC105193227	W	0.712101156890665	0.127073279071061	1.3566622902154	0.64881647979822	0	112W	south_america	0.64881647979822	-0.721430829691621	-0.625435021583717	no
LOC105193227	W	0.712101156890665	0.127073279071061	1.3566622902154	0.487180040204335	0	104W	south_america	0.487180040204335	-0.572579312748018	-0.515716104785366	no
LOC105193227	W	0.712101156890665	0.127073279071061	1.3566622902154	0.437318492001414	0	28W	south_america	0.437318492001414	-0.523379780597576	-0.479450976385114	no
LOC105193227	W	0.712101156890665	0.127073279071061	1.3566622902154	0.77538583398311	0	43CW	south_america	0.77538583398311	-0.828132590974476	-0.704085222191795	no
LOC105193228	QA	20.7422150930828	0.297259275323424	1.07755291546055	13.0526609465289	30.952431044989	114CQA	south_america	44.0050919915179	1.18508236194635	0.823925279106568	no
LOC105193228	QA	20.7422150930828	0.297259275323424	1.07755291546055	9.09402741714758	8.02075355285809	3QA	south_america	17.1147809700057	-0.162182050536063	-0.42637472301128	no
LOC105193228	QA	20.7422150930828	0.297259275323424	1.07755291546055	10.5465288814147	11.6307875097466	112BQA	south_america	22.1773163911614	0.129485377996738	-0.15569898695414	no
LOC105193228	QA	20.7422150930828	0.297259275323424	1.07755291546055	4.40822370157581	14.8988900934284	118QA	south_america	19.3071137950042	1.55569932153846	1.16786844354384	no
LOC105193228	QA	20.7422150930828	0.297259275323424	1.07755291546055	10.3918285215471	8.58163903714853	43QA	south_america	18.9734675586956	-0.249654965143849	-0.507552095697799	no
LOC105193228	QA	20.7422150930828	0.297259275323424	1.07755291546055	13.1926017558971	19.3086878335842	111BQA	south_america	32.5012895894813	0.516957943289876	0.20388666283971	no
LOC105193228	QH	22.8156813456014	-0.156919105199937	1.54693179210804	5.01297097053631	11.6307875097466	43QH	south_america	16.643758480283	1.07079469308756	0.793644428636682	no
LOC105193228	QH	22.8156813456014	-0.156919105199937	1.54693179210804	20.0518838821452	13.6410411257214	114CQH	south_america	33.6929250078666	-0.523931194915727	-0.23725163034865	no
LOC105193228	QH	22.8156813456014	-0.156919105199937	1.54693179210804	10.3810636767715	22.6190842251843	118QH	south_america	33.0001479019558	1.05331763014064	0.782346540109157	no
LOC105193228	QH	22.8156813456014	-0.156919105199937	1.54693179210804	10.230780844291	11.6307875097467	112BQH	south_america	21.8615683540377	0.169486353983792	0.211001843034676	no
LOC105193228	QH	22.8156813456014	-0.156919105199937	1.54693179210804	7.14286870268977	16.6269256344753	3QH	south_america	23.769794337165	1.11417182647476	0.821685182345726	no
LOC105193228	QH	22.8156813456014	-0.156919105199937	1.54693179210804	5.45641645028855	5.11539042214552	111BQH	south_america	10.5718068724341	-0.0782890309711089	0.0508296969717568	no
LOC105193228	QT	19.969859753651	0.182227205719409	1.1287051691787	7.86650245071949	10.2319542366002	43QT	south_america	18.0984566873197	0.341171937473457	0.140820416256005	no
LOC105193228	QT	19.969859753651	0.182227205719409	1.1287051691787	11.678696636368	11.6307875097466	114CQT	south_america	23.3094841461146	-0.00546185307813238	-0.166287055222856	no
LOC105193228	QT	19.969859753651	0.182227205719409	1.1287051691787	7.00721798182078	14.1542709756319	118QT	south_america	21.1614889574527	0.920351463691303	0.65395665593433	no
LOC105193228	QT	19.969859753651	0.182227205719409	1.1287051691787	5.64456874167781	13.1336618081715	111BQT	south_america	18.7782305498493	1.08888782242085	0.803274975130284	no
LOC105193228	QT	19.969859753651	0.182227205719409	1.1287051691787	11.6307875097467	18.0451419857426	3QT	south_america	29.6759294954892	0.592478451854024	0.363470689545202	no
LOC105193228	QT	19.969859753651	0.182227205719409	1.1287051691787	5.64307779109464	11.0285361351799	112BQT	south_america	16.6716139262745	0.856537364444068	0.597419217292431	no
LOC105193228	W	19.6062249337314	0.127073279071061	1.3566622902154	6.99709587202263	11.6307875097466	28W	south_america	18.6278833817693	0.65939650304657	0.39237710653179	no
LOC105193228	W	19.6062249337314	0.127073279071061	1.3566622902154	5.54230854482509	11.3445561748602	114W	south_america	16.8868647196853	0.916003262302228	0.581522748086342	no
LOC105193228	W	19.6062249337314	0.127073279071061	1.3566622902154	3.89744032163468	14.2034177498529	104W	south_america	18.1008580714875	1.63429586244396	1.1109784610683	no
LOC105193228	W	19.6062249337314	0.127073279071061	1.3566622902154	11.6307875097466	12.3162412107224	43CW	south_america	23.9470287204691	0.0762423171434398	-0.0374676603707696	no
LOC105193228	W	19.6062249337314	0.127073279071061	1.3566622902154	15.5715955151573	5.01297097053631	3BW	south_america	20.5845664856936	-1.46256261348398	-1.17172556797658	no
LOC105193228	W	19.6062249337314	0.127073279071061	1.3566622902154	11.0298801565697	12.2933648803873	112W	south_america	23.3232450369571	0.14408406249444	0.0125387014484487	no
LOC105193229	QA	9.57472985247009	0.297259275323424	1.07755291546055	1.29141169976507	2.37902471790272	112BQA	south_america	3.67043641766779	0.560370211899742	0.244174492780119	no
LOC105193229	QA	9.57472985247009	0.297259275323424	1.07755291546055	7.6206742491345	4.29081951857427	43QA	south_america	11.9114937677088	-0.70430950618998	-0.929484545160675	no
LOC105193229	QA	9.57472985247009	0.297259275323424	1.07755291546055	3.89289887878932	3.93325122535974	111BQA	south_america	7.82615010414906	0.0118492913158489	-0.264868648130928	no
LOC105193229	QA	9.57472985247009	0.297259275323424	1.07755291546055	8.18670116006936	3.13660844072176	118QA	south_america	11.3233096007911	-1.15109849638546	-1.34411753792143	no
LOC105193229	QA	9.57472985247009	0.297259275323424	1.07755291546055	3.03134247238253	3.00778258232178	3QA	south_america	6.03912505470431	-0.00845610278066141	-0.283712636027181	no
LOC105193229	QA	9.57472985247009	0.297259275323424	1.07755291546055	13.0526609465289	25.0000404594142	114CQA	south_america	38.0527014059431	0.887670529937112	0.547918571925858	no
LOC105193229	QH	8.71781106815573	-0.156919105199937	1.54693179210804	3.57143435134488	5.54230854482509	3QH	south_america	9.11374289616998	0.517152898607772	0.435747721552181	no
LOC105193229	QH	8.71781106815573	-0.156919105199937	1.54693179210804	1.36410411257214	1.70513014071517	111BQH	south_america	3.06923425328731	0.194404430495068	0.2271099071642	no
LOC105193229	QH	8.71781106815573	-0.156919105199937	1.54693179210804	5.19053183838576	2.38095623422992	118QH	south_america	7.57148807261568	-0.872632018010632	-0.46266610878517	no
LOC105193229	QH	8.71781106815573	-0.156919105199937	1.54693179210804	6.82052056286069	5.81539375487333	112BQH	south_america	12.635914317734	-0.198467631671214	-0.0268586673848483	no
LOC105193229	QH	8.71781106815573	-0.156919105199937	1.54693179210804	7.51945645580446	6.82052056286069	114CQH	south_america	14.3399770186651	-0.123496747094188	0.0216055796876496	no
LOC105193229	QH	8.71781106815573	-0.156919105199937	1.54693179210804	2.50648548526815	5.81539375487332	43QH	south_america	8.32187924014148	0.958771254054304	0.721227894433449	no
LOC105193229	QT	3.09637376661143	0.182227205719409	1.1287051691787	0.403076985078189	0.501297097053631	112BQT	south_america	0.904374082131819	0.0976153352938308	-0.0749636598963625	no
LOC105193229	QT	3.09637376661143	0.182227205719409	1.1287051691787	0.470380728473151	0.691245358324816	111BQT	south_america	1.16162608679797	0.201896211487324	0.0174261678824655	no
LOC105193229	QT	3.09637376661143	0.182227205719409	1.1287051691787	1.1678696636368	1.93846458495777	114CQT	south_america	3.10633424859457	0.438784488958001	0.227302302004407	no
LOC105193229	QT	3.09637376661143	0.182227205719409	1.1287051691787	0.830770536410475	2.25564274821782	3QT	south_america	3.0864132846283	0.830491417726206	0.57434326492764	no
LOC105193229	QT	3.09637376661143	0.182227205719409	1.1287051691787	2.86054634571618	1.70532570610003	43QT	south_america	4.56587205181621	-0.51300273566036	-0.615953537171849	no
LOC105193229	QT	3.09637376661143	0.182227205719409	1.1287051691787	3.50360899091039	1.76928387195399	118QT	south_america	5.27289286286438	-0.701568628095528	-0.783017441532611	no
LOC105193229	W	9.52739528588603	0.127073279071061	1.3566622902154	6.46602663562927	8.82354369155795	114W	south_america	15.2895703271872	0.395902892792704	0.198155145654532	no
LOC105193229	W	9.52739528588603	0.127073279071061	1.3566622902154	4.81050341201556	4.98462321846285	28W	south_america	9.79512663047841	0.0425972587808085	-0.062267537691226	no
LOC105193229	W	9.52739528588603	0.127073279071061	1.3566622902154	0	5.01297097053631	3BW	south_america	5.01297097053631	2.58807799349749	1.81401424081427	no
LOC105193229	W	9.52739528588603	0.127073279071061	1.3566622902154	2.59526591919288	4.91734595215493	112W	south_america	7.51261187134781	0.718851761700635	0.436201762883538	no
LOC105193229	W	9.52739528588603	0.127073279071061	1.3566622902154	3.10154333593244	6.15812060536122	43CW	south_america	9.25966394129366	0.803413979847315	0.498532837283236	no
LOC105193229	W	9.52739528588603	0.127073279071061	1.3566622902154	3.89744032163468	9.19044677931656	104W	south_america	13.0878871009512	1.05711748733291	0.685538482914706	no
LOC105193230	QA	8.88395511916711	0.297259275323424	1.07755291546055	6.18283939572422	14.2857374053795	114CQA	south_america	20.4685768011038	1.08955998839306	0.73527777773308	no
LOC105193230	QA	8.88395511916711	0.297259275323424	1.07755291546055	6.29746243082259	2.35245633054132	118QA	south_america	8.64991876136391	-1.12217633883813	-1.31727694649212	no
LOC105193230	QA	8.88395511916711	0.297259275323424	1.07755291546055	2.59526591919288	3.57568293214522	111BQA	south_america	6.1709488513381	0.347888603634359	0.0469854682628702	no
LOC105193230	QA	8.88395511916711	0.297259275323424	1.07755291546055	5.30484932666942	6.01556516464357	3QA	south_america	11.320414491313	0.154097436699729	-0.132858290826959	no
LOC105193230	QA	8.88395511916711	0.297259275323424	1.07755291546055	5.54230854482509	3.57568293214522	43QA	south_america	9.11799147697032	-0.515812715312364	-0.75455411884648	no
LOC105193230	QA	8.88395511916711	0.297259275323424	1.07755291546055	1.29141169976507	2.37902471790272	112BQA	south_america	3.67043641766779	0.560370211899742	0.244174492780119	no
LOC105193230	QH	6.77008091379043	-0.156919105199937	1.54693179210804	0	1.45384843871833	112BQH	south_america	1.45384843871833	1.2950461440856	0.938609741355765	no
LOC105193230	QH	6.77008091379043	-0.156919105199937	1.54693179210804	2.72820822514428	1.70513014071517	111BQH	south_america	4.43333836585945	-0.462784436455975	-0.19772386398448	no
LOC105193230	QH	6.77008091379043	-0.156919105199937	1.54693179210804	3.89289887878932	2.38095623422992	118QH	south_america	6.27385511301924	-0.533258126030946	-0.243280940214024	no
LOC105193230	QH	6.77008091379043	-0.156919105199937	1.54693179210804	7.51945645580446	6.82052056286069	114CQH	south_america	14.3399770186651	-0.123496747094188	0.0216055796876496	no
LOC105193230	QH	6.77008091379043	-0.156919105199937	1.54693179210804	2.50648548526815	5.81539375487332	43QH	south_america	8.32187924014148	0.958771254054304	0.721227894433449	no
LOC105193230	QH	6.77008091379043	-0.156919105199937	1.54693179210804	3.57143435134488	3.69487236321673	3QH	south_america	7.26630671456161	0.0384390346730113	0.126287494296519	no
LOC105193230	QT	4.84636940854879	0.182227205719409	1.1287051691787	0.403076985078189	1.00259419410726	112BQT	south_america	1.40567117918545	0.51327593289548	0.29329955795007	no
LOC105193230	QT	4.84636940854879	0.182227205719409	1.1287051691787	3.3230821456419	4.51128549643564	3QT	south_america	7.83436764207754	0.350328613747338	0.148932965506172	no
LOC105193230	QT	4.84636940854879	0.182227205719409	1.1287051691787	0.705571092709727	2.07373607497445	111BQT	south_america	2.77930716768417	0.849738402411785	0.591395534387506	no
LOC105193230	QT	4.84636940854879	0.182227205719409	1.1287051691787	4.67147865454719	2.35904516260532	118QT	south_america	7.03052381715251	-0.755673727417272	-0.830952988209617	no
LOC105193230	QT	4.84636940854879	0.182227205719409	1.1287051691787	2.33573932727359	1.93846458495777	114CQT	south_america	4.27420391223137	-0.182944042444723	-0.323531120558124	no
LOC105193230	QT	4.84636940854879	0.182227205719409	1.1287051691787	2.86054634571618	2.55798855915004	43QT	south_america	5.41853490486622	-0.117743161020723	-0.265765033182586	no
LOC105193230	W	8.55072321812526	0.127073279071061	1.3566622902154	3.89289887878932	5.01297097053631	3BW	south_america	8.90586984932563	0.297388526499415	0.12553989939627	no
LOC105193230	W	8.55072321812526	0.127073279071061	1.3566622902154	3.0612294440099	4.4307761941892	28W	south_america	7.4920056381991	0.419241873743568	0.215358381212262	no
LOC105193230	W	8.55072321812526	0.127073279071061	1.3566622902154	3.89289887878932	4.30267770813557	112W	south_america	8.19557658692489	0.116031598470127	-0.00813885716480002	no
LOC105193230	W	8.55072321812526	0.127073279071061	1.3566622902154	3.69487236321673	3.78151872495341	114W	south_america	7.47639108817013	0.0263829888235683	-0.0742191265827149	no
LOC105193230	W	8.55072321812526	0.127073279071061	1.3566622902154	4.38462036183902	9.19044677931656	104W	south_america	13.5750671411556	0.920300767447667	0.58469045251539	no
LOC105193230	W	8.55072321812526	0.127073279071061	1.3566622902154	3.10154333593244	6.15812060536122	43CW	south_america	9.25966394129366	0.803413979847315	0.498532837283236	no
LOC105193812	QA	11.8758620985757	0.297259275323424	1.07755291546055	5.19053183838576	10.0119122100066	111BQA	south_america	15.2024440483924	0.830929749439824	0.495261500812986	no
LOC105193812	QA	11.8758620985757	0.297259275323424	1.07755291546055	8.18670116006936	6.27321688144353	118QA	south_america	14.4599180415129	-0.33695330218054	-0.588567455393039	no
LOC105193812	QA	11.8758620985757	0.297259275323424	1.07755291546055	5.49585724064375	8.33334681980473	114CQA	south_america	13.8292040604485	0.522874579214682	0.209377470613431	no
LOC105193812	QA	11.8758620985757	0.297259275323424	1.07755291546055	1.51567123619126	8.02075355285809	3QA	south_america	9.53642478904935	1.84230456068372	1.43384632271163	no
LOC105193812	QA	11.8758620985757	0.297259275323424	1.07755291546055	2.77115427241255	7.15136586429044	43QA	south_america	9.92252013670299	1.11203565113917	0.756135837159804	no
LOC105193812	QA	11.8758620985757	0.297259275323424	1.07755291546055	0	0	112BQA	south_america	0	0	-0.27586513020233	no
LOC105193812	QH	8.99964382845511	-0.156919105199937	1.54693179210804	7.14286870268977	3.69487236321673	3QH	south_america	10.8377410659065	-0.794451203501393	-0.412126831676707	no
LOC105193812	QH	8.99964382845511	-0.156919105199937	1.54693179210804	5.45641645028855	1.70513014071517	111BQH	south_america	7.16154659100373	-1.25503563587161	-0.709867452640071	no
LOC105193812	QH	8.99964382845511	-0.156919105199937	1.54693179210804	0	2.90769687743666	43QH	south_america	2.90769687743666	1.96631856086315	1.37254769531222	no
LOC105193812	QH	8.99964382845511	-0.156919105199937	1.54693179210804	15.0389129116089	9.09402741714759	114CQH	south_america	24.1329403287565	-0.668074451489595	-0.330431728727416	no
LOC105193812	QH	8.99964382845511	-0.156919105199937	1.54693179210804	6.82052056286069	4.36154531615499	112BQH	south_america	11.1820658790157	-0.5446157645681	-0.25062298243922	no
LOC105193812	QH	8.99964382845511	-0.156919105199937	1.54693179210804	2.59526591919288	2.38095623422992	118QH	south_america	4.9762221534228	-0.0886671407162918	0.0441208622331285	no
LOC105193812	QT	5.95518330812657	0.182227205719409	1.1287051691787	5.83934831818398	2.94880645325665	118QT	south_america	8.78815477144063	-0.79244220832377	-0.863528794461353	no
LOC105193812	QT	5.95518330812657	0.182227205719409	1.1287051691787	2.86054634571618	2.55798855915004	43QT	south_america	5.41853490486622	-0.117743161020723	-0.265765033182586	no
LOC105193812	QT	5.95518330812657	0.182227205719409	1.1287051691787	2.58709400660233	3.11060411246167	111BQT	south_america	5.697698119064	0.196534879946849	0.0126761838415701	no
LOC105193812	QT	5.95518330812657	0.182227205719409	1.1287051691787	0.830770536410475	4.51128549643564	3QT	south_america	5.34205603284612	1.58993788465121	1.24719077875414	no
LOC105193812	QT	5.95518330812657	0.182227205719409	1.1287051691787	2.41846191046913	7.01815935875083	112BQT	south_america	9.43662126921996	1.22992374047594	0.928228702557364	no
LOC105193812	QT	5.95518330812657	0.182227205719409	1.1287051691787	2.33573932727359	3.87692916991555	114CQT	south_america	6.21266849718914	0.547966466355402	0.324034363111957	no
LOC105193812	W	7.02609307926421	0.127073279071061	1.3566622902154	1.55077166796622	7.38974472643346	43CW	south_america	8.94051639439968	1.71769315261785	1.17245086343061	no
LOC105193812	W	7.02609307926421	0.127073279071061	1.3566622902154	5.83934831818398	4.91734595215493	112W	south_america	10.7566942703389	-0.208908622236641	-0.247653306007612	no
LOC105193812	W	7.02609307926421	0.127073279071061	1.3566622902154	0	2.50648548526815	3BW	south_america	2.50648548526815	1.81002575613728	1.24050951309262	no
LOC105193812	W	7.02609307926421	0.127073279071061	1.3566622902154	3.41026028143035	5.0129709705363	104W	south_america	8.42323125196665	0.447214191309278	0.235976863621225	no
LOC105193812	W	7.02609307926421	0.127073279071061	1.3566622902154	1.74927396800566	2.76923512136825	28W	south_america	4.51850908937391	0.455221111705709	0.241878789586278	no
LOC105193812	W	7.02609307926421	0.127073279071061	1.3566622902154	1.84743618160836	3.78151872495341	114W	south_america	5.62895490656177	0.747805417741454	0.457543592939287	no
LOC105193815	QA	15.6832726865015	0.297259275323424	1.07755291546055	4.15673140861882	12.1573219692938	43QA	south_america	16.3140533779126	1.35133706497877	0.978214410198907	no
LOC105193815	QA	15.6832726865015	0.297259275323424	1.07755291546055	9.61775017112656	13.0952592882646	114CQA	south_america	22.7130094593911	0.408731915857099	0.103449806440393	no
LOC105193815	QA	15.6832726865015	0.297259275323424	1.07755291546055	6.29746243082259	11.7622816527066	118QA	south_america	18.0597440835292	0.806419495035502	0.472515281993797	no
LOC105193815	QA	15.6832726865015	0.297259275323424	1.07755291546055	4.3254431986548	10.7270487964357	111BQA	south_america	15.0524919950905	1.13886649288438	0.781035627564754	no
LOC105193815	QA	15.6832726865015	0.297259275323424	1.07755291546055	0	0	112BQA	south_america	0	0	-0.27586513020233	no
LOC105193815	QA	15.6832726865015	0.297259275323424	1.07755291546055	2.2735068542869	8.02075355285809	3QA	south_america	10.294260407145	1.46241095497753	1.08129416471034	no
LOC105193815	QH	12.6052879158293	-0.156919105199937	1.54693179210804	3.57143435134488	7.38974472643346	3QH	south_america	10.9611790777783	0.875980012634227	0.66770824874354	no
LOC105193815	QH	12.6052879158293	-0.156919105199937	1.54693179210804	9.08343071717508	7.14286870268977	118QH	south_america	16.2262994198649	-0.308377529696208	-0.097908922209088	no
LOC105193815	QH	12.6052879158293	-0.156919105199937	1.54693179210804	5.45641645028855	6.82052056286069	111BQH	south_america	12.2769370131492	0.276531003862193	0.280199884231132	no
LOC105193815	QH	12.6052879158293	-0.156919105199937	1.54693179210804	1.70513014071517	4.36154531615499	112BQH	south_america	6.06667545687017	0.986950875165701	0.739444354431983	no
LOC105193815	QH	12.6052879158293	-0.156919105199937	1.54693179210804	10.0259419410726	2.90769687743666	43QH	south_america	12.9336388185093	-1.49651144383567	-0.865967294401679	no
LOC105193815	QH	12.6052879158293	-0.156919105199937	1.54693179210804	20.0518838821452	4.54701370857379	114CQH	south_america	24.598897590719	-1.92416614638195	-1.14242079075364	no
LOC105193815	QT	34.5571142543599	0.182227205719409	1.1287051691787	6.44923176125102	9.52464484401898	112BQT	south_america	15.97387660527	0.498607996795955	0.280304192552569	no
LOC105193815	QT	34.5571142543599	0.182227205719409	1.1287051691787	4.15385268205238	4.51128549643564	3QT	south_america	8.66513817848802	0.0967375640809484	-0.0757413396987162	no
LOC105193815	QT	34.5571142543599	0.182227205719409	1.1287051691787	24.3146439385875	33.2538512689506	43QT	south_america	57.5684952075381	0.436294011702884	0.225095811484895	no
LOC105193815	QT	34.5571142543599	0.182227205719409	1.1287051691787	5.17418801320466	18.66362467477	111BQT	south_america	23.8378126879747	1.67120796300946	1.31919370793128	no
LOC105193815	QT	34.5571142543599	0.182227205719409	1.1287051691787	26.8610022636463	18.4154135570989	114CQT	south_america	45.2764158207452	-0.521044720336081	-0.623078502038957	no
LOC105193815	QT	34.5571142543599	0.182227205719409	1.1287051691787	34.4521550772855	27.1290193699612	118QT	south_america	61.5811744472467	-0.33381407066057	-0.457197583985086	no
LOC105193815	W	13.9645558861523	0.127073279071061	1.3566622902154	5.68514039601839	7.20001131555745	28W	south_america	12.8851517115758	0.294668041596429	0.123534621500211	no
LOC105193815	W	13.9645558861523	0.127073279071061	1.3566622902154	7.78579775757864	5.01297097053631	3BW	south_america	12.7987687281149	-0.547095296566402	-0.496931757077456	no
LOC105193815	W	13.9645558861523	0.127073279071061	1.3566622902154	1.29763295959644	11.678696636368	112W	south_america	12.9763295959644	2.46418618974836	1.72269320635885	no
LOC105193815	W	13.9645558861523	0.127073279071061	1.3566622902154	7.38974472643346	7.56303744990681	114W	south_america	14.9527821763403	0.0294957203602112	-0.0719247224711738	no
LOC105193815	W	13.9645558861523	0.127073279071061	1.3566622902154	5.42770083788177	9.85299296857795	43CW	south_america	15.2806938064597	0.755718265832834	0.46337617791526	no
LOC105193815	W	13.9645558861523	0.127073279071061	1.3566622902154	3.89744032163468	11.6969322645847	104W	south_america	15.5943725862194	1.37438014861345	0.919393778789528	no
LOC105193817	QA	4.03454125617323	0.297259275323424	1.07755291546055	0.692788568103137	4.29081951857427	43QA	south_america	4.9836080866774	1.64408941544592	1.24989698491685	no
LOC105193817	QA	4.03454125617323	0.297259275323424	1.07755291546055	0	0.784152110180441	118QA	south_america	0.784152110180441	0.83523861932102	0.499260255602077	no
LOC105193817	QA	4.03454125617323	0.297259275323424	1.07755291546055	1.29763295959644	1.78784146607261	111BQA	south_america	3.08547442566905	0.279000173051252	-0.0169449704141614	no
LOC105193817	QA	4.03454125617323	0.297259275323424	1.07755291546055	0.757835618095632	5.0129709705363	3QA	south_america	5.77080658863194	1.77427782861711	1.3707155649636	no
LOC105193817	QA	4.03454125617323	0.297259275323424	1.07755291546055	0	0	112BQA	south_america	0	0	-0.27586513020233	no
LOC105193817	QA	4.03454125617323	0.297259275323424	1.07755291546055	3.43491077540234	2.38095623422992	114CQA	south_america	5.81586700963226	-0.391473738716043	-0.63916398365003	no
LOC105193817	QH	0	-0.156919105199937	1.54693179210804	0	0	112BQH	south_america	0	0	0.10143892962863	no
LOC105193817	QH	0	-0.156919105199937	1.54693179210804	0	0	43QH	south_america	0	0	0.10143892962863	no
LOC105193817	QH	0	-0.156919105199937	1.54693179210804	0	0	3QH	south_america	0	0	0.10143892962863	no
LOC105193817	QH	0	-0.156919105199937	1.54693179210804	0	0	114CQH	south_america	0	0	0.10143892962863	no
LOC105193817	QH	0	-0.156919105199937	1.54693179210804	0	0	111BQH	south_america	0	0	0.10143892962863	no
LOC105193817	QH	0	-0.156919105199937	1.54693179210804	1.29763295959644	0	118QH	south_america	1.29763295959644	-1.20014834991483	-0.674386065395461	no
LOC105193817	QT	1.80816442912192	0.182227205719409	1.1287051691787	1.1678696636368	0.969232292478887	114CQT	south_america	2.13710195611568	-0.138644718854322	-0.284283206399429	no
LOC105193817	QT	1.80816442912192	0.182227205719409	1.1287051691787	0.583934831818398	1.17952258130266	118QT	south_america	1.76345741312106	0.460499171531959	0.246540880126414	no
LOC105193817	QT	1.80816442912192	0.182227205719409	1.1287051691787	0.830770536410475	0	3QT	south_america	0.830770536410475	-0.872450979159287	-0.93441424180429	no
LOC105193817	QT	1.80816442912192	0.182227205719409	1.1287051691787	0	2.55798855915004	43QT	south_america	2.55798855915004	1.83106187157077	1.46081962843418	no
LOC105193817	QT	1.80816442912192	0.182227205719409	1.1287051691787	0.470380728473151	1.38249071664963	111BQT	south_america	1.85287144512278	0.696280829501134	0.455436581508505	no
LOC105193817	QT	1.80816442912192	0.182227205719409	1.1287051691787	0.403076985078189	0.501297097053631	112BQT	south_america	0.904374082131819	0.0976153352938308	-0.0749636598963625	no
LOC105193817	W	0.761726731900525	0.127073279071061	1.3566622902154	0	0	3BW	south_america	0	0	-0.093666109825228	no
LOC105193817	W	0.761726731900525	0.127073279071061	1.3566622902154	0	0	43CW	south_america	0	0	-0.093666109825228	no
LOC105193817	W	0.761726731900525	0.127073279071061	1.3566622902154	0.64881647979822	0	112W	south_america	0.64881647979822	-0.721430829691621	-0.625435021583717	no
LOC105193817	W	0.761726731900525	0.127073279071061	1.3566622902154	0.874636984002829	0	28W	south_america	0.874636984002829	-0.90661125049711	-0.761932086579965	no
LOC105193817	W	0.761726731900525	0.127073279071061	1.3566622902154	0.487180040204335	2.50648548526815	104W	south_america	2.99366552547249	1.23744644338926	0.818459518132479	no
LOC105193817	W	0.761726731900525	0.127073279071061	1.3566622902154	0	1.26050624165114	114W	south_america	1.26050624165114	1.17664590119448	0.77364324909243	no
LOC105193818	QA	0.903254315013208	0.297259275323424	1.07755291546055	1.51567123619126	0	3QA	south_america	1.51567123619126	-1.33094339403446	-1.51101875926157	no
LOC105193818	QA	0.903254315013208	0.297259275323424	1.07755291546055	1.25949248616452	0.784152110180441	118QA	south_america	2.04364459634496	-0.340760140081695	-0.592100310110924	no
LOC105193818	QA	0.903254315013208	0.297259275323424	1.07755291546055	0	0	112BQA	south_america	0	0	-0.27586513020233	no
LOC105193818	QA	0.903254315013208	0.297259275323424	1.07755291546055	1.37396431016094	0	114CQA	south_america	1.37396431016094	-1.24729824587246	-1.4333936635824	no
LOC105193818	QA	0.903254315013208	0.297259275323424	1.07755291546055	0.43254431986548	0	111BQA	south_america	0.43254431986548	-0.518579773579769	-0.757122028252788	no
LOC105193818	QA	0.903254315013208	0.297259275323424	1.07755291546055	0	0	43QA	south_america	0	0	-0.27586513020233	no
LOC105193818	QH	2.43438638673989	-0.156919105199937	1.54693179210804	2.59526591919288	0	118QH	south_america	2.59526591919288	-1.84609848168342	-1.09195465831212	no
LOC105193818	QH	2.43438638673989	-0.156919105199937	1.54693179210804	1.70513014071517	0	112BQH	south_america	1.70513014071517	-1.43569800212899	-0.826654997623675	no
LOC105193818	QH	2.43438638673989	-0.156919105199937	1.54693179210804	4.09231233771641	1.70513014071517	111BQH	south_america	5.79744247843159	-0.912622907733846	-0.488517856048517	no
LOC105193818	QH	2.43438638673989	-0.156919105199937	1.54693179210804	0	1.84743618160836	3QH	south_america	1.84743618160836	1.5096635077775	1.07734718588099	no
LOC105193818	QH	2.43438638673989	-0.156919105199937	1.54693179210804	0	2.90769687743666	43QH	south_america	2.90769687743666	1.96631856086315	1.37254769531222	no
LOC105193818	QH	2.43438638673989	-0.156919105199937	1.54693179210804	0	2.2735068542869	114CQH	south_america	2.2735068542869	1.71083699974066	1.20739396169198	no
LOC105193818	QT	0.637590095071607	0.182227205719409	1.1287051691787	0	0	114CQT	south_america	0	0	-0.161448012018946	no
LOC105193818	QT	0.637590095071607	0.182227205719409	1.1287051691787	0	0.691245358324816	111BQT	south_america	0.691245358324816	0.758085974686094	0.510194145195338	no
LOC105193818	QT	0.637590095071607	0.182227205719409	1.1287051691787	0.583934831818398	0	118QT	south_america	0.583934831818398	-0.66351297951696	-0.749301242105386	no
LOC105193818	QT	0.637590095071607	0.182227205719409	1.1287051691787	0	1.00259419410726	112BQT	south_america	1.00259419410726	1.00187010289637	0.726179802803046	no
LOC105193818	QT	0.637590095071607	0.182227205719409	1.1287051691787	0	0	43QT	south_america	0	0	-0.161448012018946	no
LOC105193818	QT	0.637590095071607	0.182227205719409	1.1287051691787	0	1.12782137410891	3QT	south_america	1.12782137410891	1.0893770448693	0.8037084120116	no
LOC105193818	W	1.04102706447799	0.127073279071061	1.3566622902154	0	0	3BW	south_america	0	0	-0.093666109825228	no
LOC105193818	W	1.04102706447799	0.127073279071061	1.3566622902154	0.923718090804182	0	114W	south_america	0.923718090804182	-0.943897396406448	-0.789415820872763	no
LOC105193818	W	1.04102706447799	0.127073279071061	1.3566622902154	1.55077166796622	0	43CW	south_america	1.55077166796622	-1.35093376203875	-1.08944359386237	no
LOC105193818	W	1.04102706447799	0.127073279071061	1.3566622902154	1.29763295959644	0	112W	south_america	1.29763295959644	-1.20014834991483	-0.97829919690269	no
LOC105193818	W	1.04102706447799	0.127073279071061	1.3566622902154	0.97436008040867	0	104W	south_america	0.97436008040867	-0.981385130040271	-0.817048146105206	no
LOC105193818	W	1.04102706447799	0.127073279071061	1.3566622902154	0	1.1076940485473	28W	south_america	1.1076940485473	1.07566546153002	0.69921025247068	no
LOC105193819	QA	4.18905435563209	0.297259275323424	1.07755291546055	0.86508863973096	2.86054634571618	111BQA	south_america	3.72563498544714	1.04956083532201	0.698157416869921	no
LOC105193819	QA	4.18905435563209	0.297259275323424	1.07755291546055	4.54701370857379	7.01815935875083	3QA	south_america	11.5651730673246	0.531559800085721	0.217437604595183	no
LOC105193819	QA	4.18905435563209	0.297259275323424	1.07755291546055	0	0	112BQA	south_america	0	0	-0.27586513020233	no
LOC105193819	QA	4.18905435563209	0.297259275323424	1.07755291546055	2.51898497232903	1.56830422036088	118QA	south_america	4.08728919268992	-0.454343250670397	-0.697508693271537	no
LOC105193819	QA	4.18905435563209	0.297259275323424	1.07755291546055	0	4.29081951857427	43QA	south_america	4.29081951857427	2.40349120510135	1.95464361847856	no
LOC105193819	QA	4.18905435563209	0.297259275323424	1.07755291546055	4.80887508556328	9.52382493691969	114CQA	south_america	14.332700022483	0.857328443192074	0.519760245490381	no
LOC105193819	QH	5.71667379050626	-0.156919105199937	1.54693179210804	1.70513014071517	2.90769687743666	112BQH	south_america	4.61282701815184	0.530620558734159	0.444453768059916	no
LOC105193819	QH	5.71667379050626	-0.156919105199937	1.54693179210804	14.2857374053795	0	3QH	south_america	14.2857374053795	-3.93411424642025	-2.44173347557429	no
LOC105193819	QH	5.71667379050626	-0.156919105199937	1.54693179210804	0	6.82052056286069	111BQH	south_america	6.82052056286069	2.9672646418628	2.01960019375214	no
LOC105193819	QH	5.71667379050626	-0.156919105199937	1.54693179210804	2.50648548526815	4.54701370857379	114CQH	south_america	7.05349919384195	0.661685534724761	0.529179530798295	no
LOC105193819	QH	5.71667379050626	-0.156919105199937	1.54693179210804	1.29763295959644	0	118QH	south_america	1.29763295959644	-1.20014834991483	-0.674386065395461	no
LOC105193819	QH	5.71667379050626	-0.156919105199937	1.54693179210804	0	0	43QH	south_america	0	0	0.10143892962863	no
LOC105193819	QT	2.18626654435407	0.182227205719409	1.1287051691787	1.1678696636368	0.58976129065133	118QT	south_america	1.75763095428813	-0.447467866745897	-0.557891546579435	no
LOC105193819	QT	2.18626654435407	0.182227205719409	1.1287051691787	1.61230794031275	1.00259419410726	112BQT	south_america	2.61490213442002	-0.383454869706205	-0.501177890269814	no
LOC105193819	QT	2.18626654435407	0.182227205719409	1.1287051691787	1.64633254965603	3.45622679162408	111BQT	south_america	5.10255934128011	0.751828289566782	0.504650017915523	no
LOC105193819	QT	2.18626654435407	0.182227205719409	1.1287051691787	1.66154107282095	1.12782137410891	3QT	south_america	2.78936244692986	-0.322884785191909	-0.447514554468518	no
LOC105193819	QT	2.18626654435407	0.182227205719409	1.1287051691787	0	0	43QT	south_america	0	0	-0.161448012018946	no
LOC105193819	QT	2.18626654435407	0.182227205719409	1.1287051691787	0	0	114CQT	south_america	0	0	-0.161448012018946	no
LOC105193819	W	4.5549002361193	0.127073279071061	1.3566622902154	2.59526591919288	0	112W	south_america	2.59526591919288	-1.84609848168342	-1.45443105110647	no
LOC105193819	W	4.5549002361193	0.127073279071061	1.3566622902154	0	2.50648548526815	3BW	south_america	2.50648548526815	1.81002575613728	1.24050951309262	no
LOC105193819	W	4.5549002361193	0.127073279071061	1.3566622902154	3.0612294440099	4.4307761941892	28W	south_america	7.4920056381991	0.419241873743568	0.215358381212262	no
LOC105193819	W	4.5549002361193	0.127073279071061	1.3566622902154	0	6.15812060536122	43CW	south_america	6.15812060536122	2.83958085156244	1.99939778090295	no
LOC105193819	W	4.5549002361193	0.127073279071061	1.3566622902154	0.97436008040867	2.50648548526815	104W	south_america	3.48084556567682	0.828640626097005	0.517127476812639	no
LOC105193819	W	4.5549002361193	0.127073279071061	1.3566622902154	1.84743618160836	3.78151872495341	114W	south_america	5.62895490656177	0.747805417741454	0.457543592939287	no
LOC105193822	QA	2.65588386051849	0.297259275323424	1.07755291546055	0	0	112BQA	south_america	0	0	-0.27586513020233	no
LOC105193822	QA	2.65588386051849	0.297259275323424	1.07755291546055	0.629746243082259	0.784152110180441	118QA	south_america	1.4138983532627	0.13059126980108	-0.154672687652755	no
LOC105193822	QA	2.65588386051849	0.297259275323424	1.07755291546055	1.0813607996637	2.14540975928713	111BQA	south_america	3.22677055895083	0.595720897325473	0.276980942392501	no
LOC105193822	QA	2.65588386051849	0.297259275323424	1.07755291546055	2.07836570430941	0.715136586429044	43QA	south_america	2.79350229073845	-0.843841160146534	-1.05897392053573	no
LOC105193822	QA	2.65588386051849	0.297259275323424	1.07755291546055	1.51567123619126	1.00259419410726	3QA	south_america	2.51826543029853	-0.329073291138084	-0.581254579218334	no
LOC105193822	QA	2.65588386051849	0.297259275323424	1.07755291546055	0.686982155080468	4.76191246845985	114CQA	south_america	5.44889462354031	1.77210303124205	1.36869729064607	no
LOC105193822	QH	2.43205436007434	-0.156919105199937	1.54693179210804	0	0	114CQH	south_america	0	0	0.10143892962863	no
LOC105193822	QH	2.43205436007434	-0.156919105199937	1.54693179210804	0	1.45384843871833	112BQH	south_america	1.45384843871833	1.2950461440856	0.938609741355765	no
LOC105193822	QH	2.43205436007434	-0.156919105199937	1.54693179210804	0	0	43QH	south_america	0	0	0.10143892962863	no
LOC105193822	QH	2.43205436007434	-0.156919105199937	1.54693179210804	7.14286870268977	3.69487236321673	3QH	south_america	10.8377410659065	-0.794451203501393	-0.412126831676707	no
LOC105193822	QH	2.43205436007434	-0.156919105199937	1.54693179210804	0	3.41026028143035	111BQH	south_america	3.41026028143035	2.14086380218821	1.48538088046979	no
LOC105193822	QH	2.43205436007434	-0.156919105199937	1.54693179210804	3.89289887878932	1.19047811711496	118QH	south_america	5.08337699590428	-1.15944366479438	-0.648072891583849	no
LOC105193822	QT	1.58456429615325	0.182227205719409	1.1287051691787	0.583934831818398	1.17952258130266	118QT	south_america	1.76345741312106	0.460499171531959	0.246540880126414	no
LOC105193822	QT	1.58456429615325	0.182227205719409	1.1287051691787	2.33573932727359	0	114CQT	south_america	2.33573932727359	-1.73800655318803	-1.70127134290055	no
LOC105193822	QT	1.58456429615325	0.182227205719409	1.1287051691787	0.830770536410475	2.25564274821782	3QT	south_america	3.0864132846283	0.830491417726206	0.57434326492764	no
LOC105193822	QT	1.58456429615325	0.182227205719409	1.1287051691787	0.235190364236576	0.691245358324816	111BQT	south_america	0.926435722561392	0.453352571438262	0.240209199995192	no
LOC105193822	QT	1.58456429615325	0.182227205719409	1.1287051691787	0	0.852662853050014	43QT	south_america	0.852662853050014	0.889600364102586	0.626712074773164	no
LOC105193822	QT	1.58456429615325	0.182227205719409	1.1287051691787	0.403076985078189	1.00259419410726	112BQT	south_america	1.40567117918545	0.51327593289548	0.29329955795007	no
LOC105193822	W	1.36305848393646	0.127073279071061	1.3566622902154	0.923718090804182	0	114W	south_america	0.923718090804182	-0.943897396406448	-0.789415820872763	no
LOC105193822	W	1.36305848393646	0.127073279071061	1.3566622902154	0	2.50648548526815	3BW	south_america	2.50648548526815	1.81002575613728	1.24050951309262	no
LOC105193822	W	1.36305848393646	0.127073279071061	1.3566622902154	1.29763295959644	0	112W	south_america	1.29763295959644	-1.20014834991483	-0.97829919690269	no
LOC105193822	W	1.36305848393646	0.127073279071061	1.3566622902154	0.874636984002829	0.55384702427365	28W	south_america	1.42848400827648	-0.270766772610698	-0.29324914133096	no
LOC105193822	W	1.36305848393646	0.127073279071061	1.3566622902154	1.55077166796622	2.46324824214449	43CW	south_america	4.01401991011071	0.441192040129662	0.231537917228265	no
LOC105193822	W	1.36305848393646	0.127073279071061	1.3566622902154	0.97436008040867	0	104W	south_america	0.97436008040867	-0.981385130040271	-0.817048146105206	no
LOC105193823	QA	0.178784146607261	0.297259275323424	1.07755291546055	0.686982155080468	0	114CQA	south_america	0.686982155080468	-0.754444712858984	-0.976011454372901	no
LOC105193823	QA	0.178784146607261	0.297259275323424	1.07755291546055	0	0	112BQA	south_america	0	0	-0.27586513020233	no
LOC105193823	QA	0.178784146607261	0.297259275323424	1.07755291546055	0.629746243082259	0	118QA	south_america	0.629746243082259	-0.70464734951994	-0.929798073457162	no
LOC105193823	QA	0.178784146607261	0.297259275323424	1.07755291546055	0	0	43QA	south_america	0	0	-0.27586513020233	no
LOC105193823	QA	0.178784146607261	0.297259275323424	1.07755291546055	0	0	3QA	south_america	0	0	-0.27586513020233	no
LOC105193823	QA	0.178784146607261	0.297259275323424	1.07755291546055	0	0.357568293214522	111BQA	south_america	0.357568293214522	0.441024775417237	0.133418505978769	no
LOC105193823	QH	3.1589785794335	-0.156919105199937	1.54693179210804	0	3.41026028143035	111BQH	south_america	3.41026028143035	2.14086380218821	1.48538088046979	no
LOC105193823	QH	3.1589785794335	-0.156919105199937	1.54693179210804	2.59526591919288	2.38095623422992	118QH	south_america	4.9762221534228	-0.0886671407162918	0.0441208622331285	no
LOC105193823	QH	3.1589785794335	-0.156919105199937	1.54693179210804	10.7143030540346	5.54230854482509	3QH	south_america	16.2566115988597	-0.84039941743837	-0.441829637043686	no
LOC105193823	QH	3.1589785794335	-0.156919105199937	1.54693179210804	0	2.90769687743666	43QH	south_america	2.90769687743666	1.96631856086315	1.37254769531222	no
LOC105193823	QH	3.1589785794335	-0.156919105199937	1.54693179210804	0	1.45384843871833	112BQH	south_america	1.45384843871833	1.2950461440856	0.938609741355765	no
LOC105193823	QH	3.1589785794335	-0.156919105199937	1.54693179210804	0	2.2735068542869	114CQH	south_america	2.2735068542869	1.71083699974066	1.20739396169198	no
LOC105193823	QT	0.596271227689223	0.182227205719409	1.1287051691787	0	0.501297097053631	112BQT	south_america	0.501297097053631	0.586209505294724	0.357916584956613	no
LOC105193823	QT	0.596271227689223	0.182227205719409	1.1287051691787	0	0	118QT	south_america	0	0	-0.161448012018946	no
LOC105193823	QT	0.596271227689223	0.182227205719409	1.1287051691787	0	0	114CQT	south_america	0	0	-0.161448012018946	no
LOC105193823	QT	0.596271227689223	0.182227205719409	1.1287051691787	0	0.691245358324816	111BQT	south_america	0.691245358324816	0.758085974686094	0.510194145195338	no
LOC105193823	QT	0.596271227689223	0.182227205719409	1.1287051691787	0.830770536410475	1.12782137410891	3QT	south_america	1.95859191051939	0.216926065710017	0.0307421822262555	no
LOC105193823	QT	0.596271227689223	0.182227205719409	1.1287051691787	0	0.852662853050014	43QT	south_america	0.852662853050014	0.889600364102586	0.626712074773164	no
LOC105193823	W	0.949039085606426	0.127073279071061	1.3566622902154	0	5.01297097053631	3BW	south_america	5.01297097053631	2.58807799349749	1.81401424081427	no
LOC105193823	W	0.949039085606426	0.127073279071061	1.3566622902154	0.64881647979822	0	112W	south_america	0.64881647979822	-0.721430829691621	-0.625435021583717	no
LOC105193823	W	0.949039085606426	0.127073279071061	1.3566622902154	0.77538583398311	2.46324824214449	43CW	south_america	3.2386340761276	0.963993211193934	0.616896288898836	no
LOC105193823	W	0.949039085606426	0.127073279071061	1.3566622902154	0.97436008040867	0	104W	south_america	0.97436008040867	-0.981385130040271	-0.817048146105206	no
LOC105193823	W	0.949039085606426	0.127073279071061	1.3566622902154	0.874636984002829	0	28W	south_america	0.874636984002829	-0.90661125049711	-0.761932086579965	no
LOC105193823	W	0.949039085606426	0.127073279071061	1.3566622902154	0.923718090804182	0	114W	south_america	0.923718090804182	-0.943897396406448	-0.789415820872763	no
LOC105193827	QA	9.6578139553514	0.297259275323424	1.07755291546055	4.10917103872206	8.93920733036305	111BQA	south_america	13.0483783690851	0.960041565488071	0.615080967862607	no
LOC105193827	QA	9.6578139553514	0.297259275323424	1.07755291546055	2.51898497232903	3.13660844072176	118QA	south_america	5.6555934130508	0.2332890496004	-0.0593662035573294	no
LOC105193827	QA	9.6578139553514	0.297259275323424	1.07755291546055	7.57835618095632	13.0337245233944	3QA	south_america	20.6120807043507	0.710124823946978	0.383151066365121	no
LOC105193827	QA	9.6578139553514	0.297259275323424	1.07755291546055	3.46394284051568	7.15136586429044	43QA	south_america	10.6153087048061	0.868723267375928	0.530334969033293	no
LOC105193827	QA	9.6578139553514	0.297259275323424	1.07755291546055	0	0	112BQA	south_america	0	0	-0.27586513020233	no
LOC105193827	QA	9.6578139553514	0.297259275323424	1.07755291546055	2.74792862032187	5.95239058557481	114CQA	south_america	8.70031920589668	0.891415658106538	0.551394158243422	no
LOC105193827	QH	1.83929459691318	-0.156919105199937	1.54693179210804	0	0	111BQH	south_america	0	0	0.10143892962863	no
LOC105193827	QH	1.83929459691318	-0.156919105199937	1.54693179210804	1.29763295959644	2.38095623422992	118QH	south_america	3.67858919382636	0.557282991052306	0.461689455149787	no
LOC105193827	QH	1.83929459691318	-0.156919105199937	1.54693179210804	0	0	43QH	south_america	0	0	0.10143892962863	no
LOC105193827	QH	1.83929459691318	-0.156919105199937	1.54693179210804	5.11539042214552	0	112BQH	south_america	5.11539042214552	-2.61244460702949	-1.5873521472355	no
LOC105193827	QH	1.83929459691318	-0.156919105199937	1.54693179210804	0	0	3QH	south_america	0	0	0.10143892962863	no
LOC105193827	QH	1.83929459691318	-0.156919105199937	1.54693179210804	15.0389129116089	4.54701370857379	114CQH	south_america	19.5859266201827	-1.5317931658818	-0.8887748430125	no
LOC105193827	QT	8.41723143007189	0.182227205719409	1.1287051691787	2.86054634571618	3.41065141220006	43QT	south_america	6.27119775791623	0.192186711569557	0.00882383293893715	no
LOC105193827	QT	8.41723143007189	0.182227205719409	1.1287051691787	1.61230794031275	2.00518838821452	112BQT	south_america	3.61749632852728	0.202130460338487	0.0176337055615336	no
LOC105193827	QT	8.41723143007189	0.182227205719409	1.1287051691787	5.25541348636558	5.30785161586197	118QT	south_america	10.5632651022276	0.0120434724724622	-0.150777845175265	no
LOC105193827	QT	8.41723143007189	0.182227205719409	1.1287051691787	16.6154107282095	18.0451419857426	3QT	south_america	34.6605527139521	0.112584929851808	-0.0617010338654484	no
LOC105193827	QT	8.41723143007189	0.182227205719409	1.1287051691787	0.470380728473151	1.38249071664963	111BQT	south_america	1.85287144512278	0.696280829501134	0.455436581508505	no
LOC105193827	QT	8.41723143007189	0.182227205719409	1.1287051691787	11.678696636368	2.90769687743666	114CQT	south_america	14.5863935138046	-1.69801597880004	-1.66584085540035	no
LOC105193827	W	6.94992487263955	0.127073279071061	1.3566622902154	1.94872016081734	5.0129709705363	104W	south_america	6.96169113135365	1.02798907912005	0.664067842488605	no
LOC105193827	W	6.94992487263955	0.127073279071061	1.3566622902154	1.29763295959644	2.45867297607747	112W	south_america	3.75630593567391	0.590070260761852	0.341276517398653	no
LOC105193827	W	6.94992487263955	0.127073279071061	1.3566622902154	2.32615750194933	2.46324824214449	43CW	south_america	4.78940574409382	0.0582693166757438	-0.0507156149998044	no
LOC105193827	W	6.94992487263955	0.127073279071061	1.3566622902154	7.78579775757864	0	3BW	south_america	7.78579775757864	-3.13517329006389	-2.40461210771695	no
LOC105193827	W	6.94992487263955	0.127073279071061	1.3566622902154	6.46602663562927	8.82354369155795	114W	south_america	15.2895703271872	0.395902892792704	0.198155145654532	no
LOC105193827	W	6.94992487263955	0.127073279071061	1.3566622902154	3.0612294440099	3.87692916991555	28W	south_america	6.93815861392545	0.264056483198587	0.100970746452883	no
LOC105193829	QA	7.78142301724385	0.297259275323424	1.07755291546055	2.51898497232903	5.48906477126309	118QA	south_america	8.00804974359212	0.882851213366044	0.543446107973582	no
LOC105193829	QA	7.78142301724385	0.297259275323424	1.07755291546055	2.77115427241255	4.29081951857427	43QA	south_america	7.06197379098681	0.488485034867862	0.177462987479095	no
LOC105193829	QA	7.78142301724385	0.297259275323424	1.07755291546055	0	0	112BQA	south_america	0	0	-0.27586513020233	no
LOC105193829	QA	7.78142301724385	0.297259275323424	1.07755291546055	4.54701370857379	3.00778258232178	3QA	south_america	7.55479629089558	-0.468907044782524	-0.711024311765227	no
LOC105193829	QA	7.78142301724385	0.297259275323424	1.07755291546055	4.12189293048281	4.76191246845985	114CQA	south_america	8.88380539894266	0.169870649360884	-0.118220297244608	no
LOC105193829	QA	7.78142301724385	0.297259275323424	1.07755291546055	5.83934831818398	13.2300268489373	111BQA	south_america	19.0693751671213	1.05700761318251	0.70506824023057	no
LOC105193829	QH	3.62501177258562	-0.156919105199937	1.54693179210804	3.57143435134488	0	3QH	south_america	3.57143435134488	-2.19264690202237	-1.31597773554599	no
LOC105193829	QH	3.62501177258562	-0.156919105199937	1.54693179210804	2.72820822514428	0	111BQH	south_america	2.72820822514428	-1.89848243858497	-1.12581779123679	no
LOC105193829	QH	3.62501177258562	-0.156919105199937	1.54693179210804	1.29763295959644	2.38095623422992	118QH	south_america	3.67858919382636	0.557282991052306	0.461689455149787	no
LOC105193829	QH	3.62501177258562	-0.156919105199937	1.54693179210804	1.70513014071517	2.90769687743666	112BQH	south_america	4.61282701815184	0.530620558734159	0.444453768059916	no
LOC105193829	QH	3.62501177258562	-0.156919105199937	1.54693179210804	0	2.2735068542869	114CQH	south_america	2.2735068542869	1.71083699974066	1.20739396169198	no
LOC105193829	QH	3.62501177258562	-0.156919105199937	1.54693179210804	5.01297097053631	0	43QH	south_america	5.01297097053631	-2.58807799349749	-1.57160057133777	no
LOC105193829	QT	2.72686324676701	0.182227205719409	1.1287051691787	0.403076985078189	1.00259419410726	112BQT	south_america	1.40567117918545	0.51327593289548	0.29329955795007	no
LOC105193829	QT	2.72686324676701	0.182227205719409	1.1287051691787	0.940761456946302	2.41935875413686	111BQT	south_america	3.36012021108316	0.817102991892815	0.562481508466354	no
LOC105193829	QT	2.72686324676701	0.182227205719409	1.1287051691787	1.1678696636368	1.17952258130266	118QT	south_america	2.34739224493946	0.00773412926361629	-0.154595798106216	no
LOC105193829	QT	2.72686324676701	0.182227205719409	1.1287051691787	8.30770536410475	9.02257099287129	3QT	south_america	17.330276356976	0.106755188573337	-0.0668660153306367	no
LOC105193829	QT	2.72686324676701	0.182227205719409	1.1287051691787	1.43027317285809	0.852662853050014	43QT	south_america	2.2829360259081	-0.391518123793206	-0.50832169921761	no
LOC105193829	QT	2.72686324676701	0.182227205719409	1.1287051691787	1.1678696636368	1.93846458495777	114CQT	south_america	3.10633424859457	0.438784488958001	0.227302302004407	no
LOC105193829	W	2.9620167403465	0.127073279071061	1.3566622902154	0	1.26050624165114	114W	south_america	1.26050624165114	1.17664590119448	0.77364324909243	no
LOC105193829	W	2.9620167403465	0.127073279071061	1.3566622902154	1.29763295959644	1.8440047320581	112W	south_america	3.14163769165454	0.307775515503499	0.133196181345727	no
LOC105193829	W	2.9620167403465	0.127073279071061	1.3566622902154	8.74636984002829	2.2153880970946	28W	south_america	10.9617579371229	-1.59987208746543	-1.27293680895509	no
LOC105193829	W	2.9620167403465	0.127073279071061	1.3566622902154	0.487180040204335	0.835495161756051	104W	south_america	1.32267520196039	0.303589998845666	0.130111023979726	no
LOC105193829	W	2.9620167403465	0.127073279071061	1.3566622902154	7.78579775757864	0	3BW	south_america	7.78579775757864	-3.13517329006389	-2.40461210771695	no
LOC105193829	W	2.9620167403465	0.127073279071061	1.3566622902154	1.55077166796622	1.23162412107224	43CW	south_america	2.78239578903846	-0.192839711722575	-0.235808862014469	no
LOC105193830	QA	4.40724954438732	0.297259275323424	1.07755291546055	1.73017727946192	2.86054634571618	111BQA	south_america	4.5907236251781	0.499810399432925	0.187973250504297	no
LOC105193830	QA	4.40724954438732	0.297259275323424	1.07755291546055	2.51898497232903	0.784152110180441	118QA	south_america	3.30313708250948	-0.979920733813824	-1.18525966642796	no
LOC105193830	QA	4.40724954438732	0.297259275323424	1.07755291546055	2.74792862032187	2.38095623422992	114CQA	south_america	5.1288848545518	-0.148662136019224	-0.413827854711024	no
LOC105193830	QA	4.40724954438732	0.297259275323424	1.07755291546055	3.03134247238253	2.00518838821452	3QA	south_america	5.03653086059705	-0.423804915919109	-0.669168243059646	no
LOC105193830	QA	4.40724954438732	0.297259275323424	1.07755291546055	2.07836570430941	2.14540975928713	43QA	south_america	4.22377546359654	0.031083340906476	-0.247018898652587	no
LOC105193830	QA	4.40724954438732	0.297259275323424	1.07755291546055	0	0	112BQA	south_america	0	0	-0.27586513020233	no
LOC105193830	QH	4.06760036642815	-0.156919105199937	1.54693179210804	5.01297097053631	0	114CQH	south_america	5.01297097053631	-2.58807799349749	-1.57160057133777	no
LOC105193830	QH	4.06760036642815	-0.156919105199937	1.54693179210804	0	0	111BQH	south_america	0	0	0.10143892962863	no
LOC105193830	QH	4.06760036642815	-0.156919105199937	1.54693179210804	1.70513014071517	1.45384843871833	112BQH	south_america	3.1589785794335	-0.140651858043397	0.0105158141034599	no
LOC105193830	QH	4.06760036642815	-0.156919105199937	1.54693179210804	3.57143435134488	1.84743618160836	3QH	south_america	5.41887053295325	-0.682983394244875	-0.340069479293627	no
LOC105193830	QH	4.06760036642815	-0.156919105199937	1.54693179210804	2.59526591919288	2.38095623422992	118QH	south_america	4.9762221534228	-0.0886671407162918	0.0441208622331285	no
LOC105193830	QH	4.06760036642815	-0.156919105199937	1.54693179210804	2.50648548526815	0	43QH	south_america	2.50648548526815	-1.81002575613728	-1.06863577267658	no
LOC105193830	QT	3.41011676416437	0.182227205719409	1.1287051691787	0.940761456946302	1.03686803748722	111BQT	south_america	1.97762949443353	0.0697297112074451	-0.0996695129816963	no
LOC105193830	QT	3.41011676416437	0.182227205719409	1.1287051691787	7.15136586429044	0.852662853050014	43QT	south_america	8.00402871734046	-2.13744145727007	-2.05515906751574	no
LOC105193830	QT	3.41011676416437	0.182227205719409	1.1287051691787	2.33573932727359	1.17952258130266	118QT	south_america	3.51526190857625	-0.613994402139107	-0.705429220668748	no
LOC105193830	QT	3.41011676416437	0.182227205719409	1.1287051691787	1.20923095523457	1.50389129116089	112BQT	south_america	2.71312224639546	0.180627680269527	-0.00141713309512541	no
LOC105193830	QT	3.41011676416437	0.182227205719409	1.1287051691787	1.66154107282095	6.76692824465346	3QT	south_america	8.42846931747441	1.54508230751368	1.20745004010742	no
LOC105193830	QT	3.41011676416437	0.182227205719409	1.1287051691787	2.33573932727359	0.969232292478887	114CQT	south_america	3.30497161975248	-0.760373250257045	-0.835116628961961	no
LOC105193830	W	3.36382645379447	0.127073279071061	1.3566622902154	1.84743618160836	1.26050624165114	114W	south_america	3.1079424232595	-0.333017606583022	-0.339134424957765	no
LOC105193830	W	3.36382645379447	0.127073279071061	1.3566622902154	1.94872016081734	1.6709903235121	104W	south_america	3.61971048432944	-0.142714165003594	-0.198861165391293	no
LOC105193830	W	3.36382645379447	0.127073279071061	1.3566622902154	3.10154333593244	2.46324824214449	43CW	south_america	5.56479157807693	-0.244041069546718	-0.273549542354315	no
LOC105193830	W	3.36382645379447	0.127073279071061	1.3566622902154	1.31195547600424	1.1076940485473	28W	south_america	2.41964952455154	-0.133448152932104	-0.192031159030596	no
LOC105193830	W	3.36382645379447	0.127073279071061	1.3566622902154	1.29763295959644	0	112W	south_america	1.29763295959644	-1.20014834991483	-0.97829919690269	no
LOC105193830	W	3.36382645379447	0.127073279071061	1.3566622902154	3.89289887878932	0	3BW	south_america	3.89289887878932	-2.29068946699808	-1.78214045124323	no
LOC105193832	QA	7.39895218856035	0.297259275323424	1.07755291546055	2.51898497232903	3.92076055090221	118QA	south_america	6.43974552323124	0.48372196206704	0.173042719358169	no
LOC105193832	QA	7.39895218856035	0.297259275323424	1.07755291546055	3.46035455892384	5.72109269143235	111BQA	south_america	9.18144725035619	0.5915374040595	0.273098540697002	no
LOC105193832	QA	7.39895218856035	0.297259275323424	1.07755291546055	0	0	112BQA	south_america	0	0	-0.27586513020233	no
LOC105193832	QA	7.39895218856035	0.297259275323424	1.07755291546055	1.37396431016094	8.33334681980473	114CQA	south_america	9.70731112996567	1.97509626012663	1.5570808270572	no
LOC105193832	QA	7.39895218856035	0.297259275323424	1.07755291546055	6.92788568103137	1.43027317285809	43QA	south_america	8.35815885388946	-1.70581767132409	-1.85891283658343	no
LOC105193832	QA	7.39895218856035	0.297259275323424	1.07755291546055	4.54701370857379	1.00259419410726	3QA	south_america	5.54960790268105	-1.46984118796566	-1.63991989435974	no
LOC105193832	QH	3.06923425328731	-0.156919105199937	1.54693179210804	2.59526591919288	2.38095623422992	118QH	south_america	4.9762221534228	-0.0886671407162918	0.0441208622331285	no
LOC105193832	QH	3.06923425328731	-0.156919105199937	1.54693179210804	3.41026028143035	0	112BQH	south_america	3.41026028143035	-2.14086380218821	-1.28250302121253	no
LOC105193832	QH	3.06923425328731	-0.156919105199937	1.54693179210804	2.50648548526815	0	114CQH	south_america	2.50648548526815	-1.81002575613728	-1.06863577267658	no
LOC105193832	QH	3.06923425328731	-0.156919105199937	1.54693179210804	2.50648548526815	0	43QH	south_america	2.50648548526815	-1.81002575613728	-1.06863577267658	no
LOC105193832	QH	3.06923425328731	-0.156919105199937	1.54693179210804	7.14286870268977	0	3QH	south_america	7.14286870268977	-3.02553714019678	-1.85439206151922	no
LOC105193832	QH	3.06923425328731	-0.156919105199937	1.54693179210804	2.72820822514428	0	111BQH	south_america	2.72820822514428	-1.89848243858497	-1.12581779123679	no
LOC105193832	QT	5.65610224081918	0.182227205719409	1.1287051691787	2.33573932727359	1.93846458495777	114CQT	south_america	4.27420391223137	-0.182944042444723	-0.323531120558124	no
LOC105193832	QT	5.65610224081918	0.182227205719409	1.1287051691787	4.98462321846285	5.63910687054455	3QT	south_america	10.6237300890074	0.14972875485096	-0.0287926836483761	no
LOC105193832	QT	5.65610224081918	0.182227205719409	1.1287051691787	5.72109269143235	1.70532570610003	43QT	south_america	7.42641839753238	-1.31289350338827	-1.32463352692502	no
LOC105193832	QT	5.65610224081918	0.182227205719409	1.1287051691787	2.41846191046913	3.00778258232178	112BQT	south_america	5.42624449279091	0.229456895607696	0.0418441335948282	no
LOC105193832	QT	5.65610224081918	0.182227205719409	1.1287051691787	1.8815229138926	1.72811339581204	111BQT	south_america	3.60963630970464	-0.0789278799239737	-0.231375821405525	no
LOC105193832	QT	5.65610224081918	0.182227205719409	1.1287051691787	1.1678696636368	4.71809032521064	118QT	south_america	5.88595998884744	1.39925538774373	1.07825162430141	no
LOC105193832	W	4.44347887714227	0.127073279071061	1.3566622902154	2.59526591919288	1.22933648803873	112W	south_america	3.82460240723161	-0.689484093445137	-0.601886982785195	no
LOC105193832	W	4.44347887714227	0.127073279071061	1.3566622902154	3.89289887878932	0	3BW	south_america	3.89289887878932	-2.29068946699808	-1.78214045124323	no
LOC105193832	W	4.44347887714227	0.127073279071061	1.3566622902154	1.84743618160836	2.52101248330227	114W	south_america	4.36844866491063	0.306326834324526	0.132128353936193	no
LOC105193832	W	4.44347887714227	0.127073279071061	1.3566622902154	4.65231500389866	0	43CW	south_america	4.65231500389866	-2.49884186940484	-1.93557023543345	no
LOC105193832	W	4.44347887714227	0.127073279071061	1.3566622902154	1.74927396800566	2.76923512136825	28W	south_america	4.51850908937391	0.455221111705709	0.241878789586278	no
LOC105193832	W	4.44347887714227	0.127073279071061	1.3566622902154	5.84616048245202	1.6709903235121	104W	south_america	7.51715080596412	-1.35792036192278	-1.09459343839952	no
LOC105193833	QA	0.725312093099384	0.297259275323424	1.07755291546055	0.692788568103137	0	43QA	south_america	0.692788568103137	-0.75940178965543	-0.980611763764044	no
LOC105193833	QA	0.725312093099384	0.297259275323424	1.07755291546055	0.757835618095632	0	3QA	south_america	0.757835618095632	-0.813800164880386	-1.03109501562524	no
LOC105193833	QA	0.725312093099384	0.297259275323424	1.07755291546055	0.21627215993274	0.357568293214522	111BQA	south_america	0.573840453147262	0.15855868491541	-0.128718124574638	no
LOC105193833	QA	0.725312093099384	0.297259275323424	1.07755291546055	2.06094646524141	1.19047811711496	114CQA	south_america	3.25142458235637	-0.482732010708858	-0.723854276519603	no
LOC105193833	QA	0.725312093099384	0.297259275323424	1.07755291546055	0	0	112BQA	south_america	0	0	-0.27586513020233	no
LOC105193833	QA	0.725312093099384	0.297259275323424	1.07755291546055	1.25949248616452	0.784152110180441	118QA	south_america	2.04364459634496	-0.340760140081695	-0.592100310110924	no
LOC105193833	QH	0.852565070357586	-0.156919105199937	1.54693179210804	1.70513014071517	0	112BQH	south_america	1.70513014071517	-1.43569800212899	-0.826654997623675	no
LOC105193833	QH	0.852565070357586	-0.156919105199937	1.54693179210804	0	0	111BQH	south_america	0	0	0.10143892962863	no
LOC105193833	QH	0.852565070357586	-0.156919105199937	1.54693179210804	2.50648548526815	2.2735068542869	114CQH	south_america	4.77999233955505	-0.0991887563966214	0.0373192593867666	no
LOC105193833	QH	0.852565070357586	-0.156919105199937	1.54693179210804	0	3.57143435134488	118QH	south_america	3.57143435134488	2.19264690202237	1.51885559480325	no
LOC105193833	QH	0.852565070357586	-0.156919105199937	1.54693179210804	0	0	3QH	south_america	0	0	0.10143892962863	no
LOC105193833	QH	0.852565070357586	-0.156919105199937	1.54693179210804	0	0	43QH	south_america	0	0	0.10143892962863	no
LOC105193833	QT	3.14369584520764	0.182227205719409	1.1287051691787	1.75180449545519	3.53856774390798	118QT	south_america	5.29037223936318	0.721859115569523	0.478098200119679	no
LOC105193833	QT	3.14369584520764	0.182227205719409	1.1287051691787	0.830770536410475	0	3QT	south_america	0.830770536410475	-0.872450979159287	-0.93441424180429	no
LOC105193833	QT	3.14369584520764	0.182227205719409	1.1287051691787	2.86054634571618	2.55798855915004	43QT	south_america	5.41853490486622	-0.117743161020723	-0.265765033182586	no
LOC105193833	QT	3.14369584520764	0.182227205719409	1.1287051691787	1.20923095523457	1.00259419410726	112BQT	south_america	2.21182514934183	-0.141674144477005	-0.286967189520449	no
LOC105193833	QT	3.14369584520764	0.182227205719409	1.1287051691787	1.1678696636368	2.90769687743666	114CQT	south_america	4.07556654107346	0.850040539077851	0.591663218698977	no
LOC105193833	QT	3.14369584520764	0.182227205719409	1.1287051691787	0.705571092709727	0.691245358324816	111BQT	south_america	1.39681645103454	-0.0121689168598542	-0.172229318946697	no
LOC105193833	W	2.52868517241031	0.127073279071061	1.3566622902154	0	0	3BW	south_america	0	0	-0.093666109825228	no
LOC105193833	W	2.52868517241031	0.127073279071061	1.3566622902154	2.59526591919288	0.614668244019367	112W	south_america	3.20993416321225	-1.15486070801779	-0.944917534993415	no
LOC105193833	W	2.52868517241031	0.127073279071061	1.3566622902154	1.94872016081734	2.50648548526815	104W	south_america	4.45520564608549	0.249936841759833	0.0905631147669519	no
LOC105193833	W	2.52868517241031	0.127073279071061	1.3566622902154	1.84743618160836	0	114W	south_america	1.84743618160836	-1.5096635077775	-1.20644378387542	no
LOC105193833	W	2.52868517241031	0.127073279071061	1.3566622902154	0.874636984002829	0.55384702427365	28W	south_america	1.42848400827648	-0.270766772610698	-0.29324914133096	no
LOC105193833	W	2.52868517241031	0.127073279071061	1.3566622902154	3.10154333593244	1.23162412107224	43CW	south_america	4.33316745700468	-0.878072821398955	-0.740896321597049	no
LOC105193834	QA	4.52619765934319	0.297259275323424	1.07755291546055	3.46394284051568	1.43027317285809	43QA	south_america	4.89421601337377	-0.87720006610094	-1.08993194169253	no
LOC105193834	QA	4.52619765934319	0.297259275323424	1.07755291546055	1.25949248616452	1.56830422036088	118QA	south_america	2.8277967065254	0.184817343061732	-0.104349336954496	no
LOC105193834	QA	4.52619765934319	0.297259275323424	1.07755291546055	1.29763295959644	2.86054634571618	111BQA	south_america	4.15817930531262	0.748656682676673	0.418909736010803	no
LOC105193834	QA	4.52619765934319	0.297259275323424	1.07755291546055	3.03134247238253	3.00778258232178	3QA	south_america	6.03912505470431	-0.00845610278066141	-0.283712636027181	no
LOC105193834	QA	4.52619765934319	0.297259275323424	1.07755291546055	3.43491077540234	4.76191246845985	114CQA	south_america	8.19682324386219	0.377642664417856	0.074598089746781	no
LOC105193834	QA	4.52619765934319	0.297259275323424	1.07755291546055	0	0	112BQA	south_america	0	0	-0.27586513020233	no
LOC105193834	QH	2.92247060281589	-0.156919105199937	1.54693179210804	3.57143435134488	0	3QH	south_america	3.57143435134488	-2.19264690202237	-1.31597773554599	no
LOC105193834	QH	2.92247060281589	-0.156919105199937	1.54693179210804	1.29763295959644	2.38095623422992	118QH	south_america	3.67858919382636	0.557282991052306	0.461689455149787	no
LOC105193834	QH	2.92247060281589	-0.156919105199937	1.54693179210804	5.11539042214552	2.90769687743666	112BQH	south_america	8.02308729958218	-0.646126046166341	-0.316243381551911	no
LOC105193834	QH	2.92247060281589	-0.156919105199937	1.54693179210804	0	2.2735068542869	114CQH	south_america	2.2735068542869	1.71083699974066	1.20739396169198	no
LOC105193834	QH	2.92247060281589	-0.156919105199937	1.54693179210804	0	0	43QH	south_america	0	0	0.10143892962863	no
LOC105193834	QH	2.92247060281589	-0.156919105199937	1.54693179210804	0	1.70513014071517	111BQH	south_america	1.70513014071517	1.43569800212899	1.02953285688093	no
LOC105193834	QT	2.18342864190605	0.182227205719409	1.1287051691787	0	1.93846458495777	114CQT	south_america	1.93846458495777	1.5550625107433	1.21629221032348	no
LOC105193834	QT	2.18342864190605	0.182227205719409	1.1287051691787	0.403076985078189	2.00518838821452	112BQT	south_america	2.40826537329271	1.09886126294017	0.812111153781418	no
LOC105193834	QT	2.18342864190605	0.182227205719409	1.1287051691787	0.715136586429044	0.852662853050014	43QT	south_america	1.56779943947906	0.111276892825549	-0.0628599166826597	no
LOC105193834	QT	2.18342864190605	0.182227205719409	1.1287051691787	1.1678696636368	1.76928387195399	118QT	south_america	2.93715353559079	0.353234926346803	0.151507874064072	no
LOC105193834	QT	2.18342864190605	0.182227205719409	1.1287051691787	2.35190364236576	1.72811339581204	111BQT	south_america	4.0800170381778	-0.297077064112528	-0.424649663100863	no
LOC105193834	QT	2.18342864190605	0.182227205719409	1.1287051691787	0.830770536410475	1.12782137410891	3QT	south_america	1.95859191051939	0.216926065710017	0.0307421822262555	no
LOC105193834	W	3.02667060902148	0.127073279071061	1.3566622902154	0	0	3BW	south_america	0	0	-0.093666109825228	no
LOC105193834	W	3.02667060902148	0.127073279071061	1.3566622902154	1.29763295959644	2.45867297607747	112W	south_america	3.75630593567391	0.590070260761852	0.341276517398653	no
LOC105193834	W	3.02667060902148	0.127073279071061	1.3566622902154	1.55077166796622	9.85299296857795	43CW	south_america	11.4037646365442	2.08908728754447	1.44620663714468	no
LOC105193834	W	3.02667060902148	0.127073279071061	1.3566622902154	1.46154012061301	0.835495161756051	104W	south_america	2.29703528236906	-0.423391942639959	-0.405749629573343	no
LOC105193834	W	3.02667060902148	0.127073279071061	1.3566622902154	3.69487236321673	3.78151872495341	114W	south_america	7.47639108817013	0.0263829888235683	-0.0742191265827149	no
LOC105193834	W	3.02667060902148	0.127073279071061	1.3566622902154	0	1.1076940485473	28W	south_america	1.1076940485473	1.07566546153002	0.69921025247068	no
LOC105193871	QA	44.5601241883308	0.297259275323424	1.07755291546055	22.492304633005	35.0416927350232	111BQA	south_america	57.5339973680281	0.617478519388238	0.297172639478176	no
LOC105193871	QA	44.5601241883308	0.297259275323424	1.07755291546055	26.1053218930578	41.6667340990236	114CQA	south_america	67.7720559920814	0.65453554453807	0.331562621276882	no
LOC105193871	QA	44.5601241883308	0.297259275323424	1.07755291546055	19.7037260704864	22.0570722703597	3QA	south_america	41.7607983408462	0.155318900419442	-0.131724737474555	no
LOC105193871	QA	44.5601241883308	0.297259275323424	1.07755291546055	0	0	112BQA	south_america	0	0	-0.27586513020233	no
LOC105193871	QA	44.5601241883308	0.297259275323424	1.07755291546055	17.6328948063032	25.0928675257741	118QA	south_america	42.7257623320774	0.485803671833633	0.174974605706138	no
LOC105193871	QA	44.5601241883308	0.297259275323424	1.07755291546055	24.9403884517129	21.4540975928713	43QA	south_america	46.3944860445843	-0.208221340947869	-0.469100504503068	no
LOC105193871	QH	45.5537135949836	-0.156919105199937	1.54693179210804	27.5713403379497	23.2615750194933	43QH	south_america	50.832915357443	-0.235895506767088	-0.05105357713253	no
LOC105193871	QH	45.5537135949836	-0.156919105199937	1.54693179210804	27.2820822514428	13.084635948465	112BQH	south_america	40.3667181999077	-1.00576606737318	-0.548729405203124	no
LOC105193871	QH	45.5537135949836	-0.156919105199937	1.54693179210804	40.1037677642904	22.735068542869	114CQH	south_america	62.8388363071594	-0.792250428134752	-0.410704160439443	no
LOC105193871	QH	45.5537135949836	-0.156919105199937	1.54693179210804	22.0597603131395	16.6666936396095	118QH	south_america	38.7264539527489	-0.384345455846132	-0.147017697746244	no
LOC105193871	QH	45.5537135949836	-0.156919105199937	1.54693179210804	20.4615616885821	18.7564315478669	111BQH	south_america	39.217993236449	-0.1194326726215	0.0242327637001715	no
LOC105193871	QH	45.5537135949836	-0.156919105199937	1.54693179210804	28.5714748107591	22.1692341793004	3QH	south_america	50.7407089900594	-0.351995837327712	-0.126105580816811	no
LOC105193871	QT	20.7151000189846	0.182227205719409	1.1287051691787	8.17508764545757	7.07713548781596	118QT	south_america	15.2522231332735	-0.183878199704696	-0.324358756760635	no
LOC105193871	QT	20.7151000189846	0.182227205719409	1.1287051691787	9.29677562357758	8.52662853050014	43QT	south_america	17.8234041540777	-0.112154995970603	-0.26081408123985	no
LOC105193871	QT	20.7151000189846	0.182227205719409	1.1287051691787	10.8187567548825	12.7880391290091	111BQT	south_america	23.6067958838916	0.222339015308856	0.035537898367768	no
LOC105193871	QT	20.7151000189846	0.182227205719409	1.1287051691787	4.83692382093826	6.5168622616972	112BQT	south_america	11.3537860826355	0.364922328872812	0.161862573276191	no
LOC105193871	QT	20.7151000189846	0.182227205719409	1.1287051691787	19.8537842818255	10.6615552172678	114CQT	south_america	30.5153394990933	-0.838549006360804	-0.904378078487034	no
LOC105193871	QT	20.7151000189846	0.182227205719409	1.1287051691787	21.6000339466724	28.1955343527228	3QT	south_america	49.7955682993951	0.36942277670916	0.165849839357043	no
LOC105193871	W	35.1068777012726	0.127073279071061	1.3566622902154	18.8156779141484	17.2107108325423	112W	south_america	36.0263887466907	-0.121855086961679	-0.183485873992427	no
LOC105193871	W	35.1068777012726	0.127073279071061	1.3566622902154	20.321797997692	13.8655686581625	114W	south_america	34.1873666558545	-0.520354448740274	-0.477220994849457	no
LOC105193871	W	35.1068777012726	0.127073279071061	1.3566622902154	31.1431910303146	10.0259419410726	3BW	south_america	41.1691329713872	-1.5436112505359	-1.23146677080683	no
LOC105193871	W	35.1068777012726	0.127073279071061	1.3566622902154	10.8554016757635	18.4743618160836	43CW	south_america	29.3297634918472	0.716031507320951	0.434122944595432	no
LOC105193871	W	35.1068777012726	0.127073279071061	1.3566622902154	9.62100682403112	11.076940485473	28W	south_america	20.6979473095041	0.185334481792755	0.0429445140046199	no
LOC105193871	W	35.1068777012726	0.127073279071061	1.3566622902154	17.0513014071517	23.3938645291694	104W	south_america	40.4451659363212	0.434415479284708	0.226542893121066	no
LOC105194381	QA	25.4887042299165	0.297259275323424	1.07755291546055	28.1153807912562	0	111BQA	south_america	28.1153807912562	-4.86370958235542	-4.78952706974306	no
LOC105194381	QA	25.4887042299165	0.297259275323424	1.07755291546055	0.686982155080468	0	114CQA	south_america	0.686982155080468	-0.754444712858984	-0.976011454372901	no
LOC105194381	QA	25.4887042299165	0.297259275323424	1.07755291546055	15.2817051138867	14.8028204669503	112BQA	south_america	30.0845255808369	-0.043069723118134	-0.315835068105311	no
LOC105194381	QA	25.4887042299165	0.297259275323424	1.07755291546055	6.29746243082259	5.48906477126309	118QA	south_america	11.7865272020857	-0.169384311887777	-0.433058628041258	no
LOC105194381	QA	25.4887042299165	0.297259275323424	1.07755291546055	0	28.6054634571618	43QA	south_america	28.6054634571618	4.88779153341788	4.26014555037649	no
LOC105194381	QA	25.4887042299165	0.297259275323424	1.07755291546055	6.82052056286069	16.0415071057162	3QA	south_america	22.8620276685769	1.12371638235567	0.766975890626228	no
LOC105194381	QH	30.8859387177369	-0.156919105199937	1.54693179210804	42.2872274897363	0	111BQH	south_america	42.2872274897363	-5.43586949500103	-3.41252950953148	no
LOC105194381	QH	30.8859387177369	-0.156919105199937	1.54693179210804	25.0000404594142	7.38974472643346	3QH	south_america	32.3897851858476	-1.63181504850568	-0.95343308013333	no
LOC105194381	QH	30.8859387177369	-0.156919105199937	1.54693179210804	11.9359109850062	17.44618126462	112BQH	south_america	29.3820922496262	0.511940523486487	0.43237822902001	no
LOC105194381	QH	30.8859387177369	-0.156919105199937	1.54693179210804	10.0259419410726	13.6410411257214	114CQH	south_america	23.666983066794	0.40911623762943	0.365908403794597	no
LOC105194381	QH	30.8859387177369	-0.156919105199937	1.54693179210804	23.3573932727359	11.9047811711496	118QH	south_america	35.2621744438855	-0.916454066756585	-0.490994473984928	no
LOC105194381	QH	30.8859387177369	-0.156919105199937	1.54693179210804	0	8.72309063230999	43QH	south_america	8.72309063230999	3.28141496930191	2.2226798182332	no
LOC105194381	QT	18.342528936783	0.182227205719409	1.1287051691787	15.1823056272783	6.78462604735221	114CQT	south_america	21.9669316746306	-1.05571753227487	-1.09678308543149	no
LOC105194381	QT	18.342528936783	0.182227205719409	1.1287051691787	0	1.12782137410891	3QT	south_america	1.12782137410891	1.0893770448693	0.8037084120116	no
LOC105194381	QT	18.342528936783	0.182227205719409	1.1287051691787	9.34295730909437	9.43618065042128	118QT	south_america	18.7791379595157	0.0129450754737325	-0.149979051100523	no
LOC105194381	QT	18.342528936783	0.182227205719409	1.1287051691787	10.0769246269547	20.0518838821452	112BQT	south_america	30.1288085090999	0.92639195206154	0.6593083532023	no
LOC105194381	QT	18.342528936783	0.182227205719409	1.1287051691787	0	17.9059199140503	43QT	south_america	17.9059199140503	4.24076614379727	3.59574763091681	no
LOC105194381	QT	18.342528936783	0.182227205719409	1.1287051691787	12.4650893045385	0	111BQT	south_america	12.4650893045385	-3.75115189314786	-3.48485964827236	no
LOC105194381	W	15.2347448573076	0.127073279071061	1.3566622902154	0	17.2427376950114	43CW	south_america	17.2427376950114	4.18925034646448	2.99424336969554	no
LOC105194381	W	15.2347448573076	0.127073279071061	1.3566622902154	4.87180040204335	8.35495161756051	104W	south_america	13.2267520196039	0.671927264066486	0.401613569511775	no
LOC105194381	W	15.2347448573076	0.127073279071061	1.3566622902154	0.64881647979822	0.614668244019367	112W	south_america	1.26348472381759	-0.0301930560259896	-0.115921505470666	no
LOC105194381	W	15.2347448573076	0.127073279071061	1.3566622902154	3.89289887878932	2.50648548526815	3BW	south_america	6.39938436405747	-0.4806637108608	-0.447964828325383	no
LOC105194381	W	15.2347448573076	0.127073279071061	1.3566622902154	8.31346281723764	11.3445561748602	114W	south_america	19.6580189920979	0.406485390271328	0.205955537509564	no
LOC105194381	W	15.2347448573076	0.127073279071061	1.3566622902154	14.4315102360467	9.41539941265205	28W	south_america	23.8469096486987	-0.567161095781666	-0.511722320182205	no
LOC105194453	QA	44.5325299058819	0.297259275323424	1.07755291546055	12.5949248616452	18.8196506443306	118QA	south_america	31.4145755059758	0.543863355056169	0.228855656362218	no
LOC105194453	QA	44.5325299058819	0.297259275323424	1.07755291546055	28.9804694309872	38.6173756671684	111BQA	south_america	67.5978450981555	0.402110343409989	0.0973047973627832	no
LOC105194453	QA	44.5325299058819	0.297259275323424	1.07755291546055	27.4792862032187	34.5238653963339	114CQA	south_america	62.0031515995526	0.318875584228933	0.0200605544241605	no
LOC105194453	QA	44.5325299058819	0.297259275323424	1.07755291546055	25.6129987120072	28.8126326945997	112BQA	south_america	54.4256314066069	0.163792702308052	-0.123860806370079	no
LOC105194453	QA	44.5325299058819	0.297259275323424	1.07755291546055	34.6394284051568	0	43QA	south_america	34.6394284051568	-5.15540229359741	-5.06022626887921	no
LOC105194453	QA	44.5325299058819	0.297259275323424	1.07755291546055	0	26.0674490467888	3QA	south_america	26.0674490467888	4.75848702304005	4.14014725746429	no
LOC105194453	QH	21.2505417126495	-0.156919105199937	1.54693179210804	11.678696636368	15.4762155224945	118QH	south_america	27.1549121588625	0.377978458307995	0.345779669302042	no
LOC105194453	QH	21.2505417126495	-0.156919105199937	1.54693179210804	0	11.0846170896502	3QH	south_america	11.0846170896502	3.59509985581753	2.42545856265874	no
LOC105194453	QH	21.2505417126495	-0.156919105199937	1.54693179210804	8.52565070357586	5.81539375487333	112BQH	south_america	14.3410444584492	-0.483020637244547	-0.210805372097386	no
LOC105194453	QH	21.2505417126495	-0.156919105199937	1.54693179210804	15.0389129116089	15.9145479800083	114CQH	south_america	30.9534608916172	0.0766882615826062	0.151013359460537	no
LOC105194453	QH	21.2505417126495	-0.156919105199937	1.54693179210804	6.82052056286069	8.52565070357586	111BQH	south_america	15.3461712664366	0.284553005573333	0.285385634341167	no
LOC105194453	QH	21.2505417126495	-0.156919105199937	1.54693179210804	32.584311308486	0	43QH	south_america	32.584311308486	-5.06971553969841	-3.17583261237634	no
LOC105194453	QT	36.7252125665101	0.182227205719409	1.1287051691787	39.7075685636511	25.9494967886585	118QT	south_america	65.6570653523096	-0.595038718149442	-0.688635035165497	no
LOC105194453	QT	36.7252125665101	0.182227205719409	1.1287051691787	21.0216539454623	15.5077166796622	114CQT	south_america	36.5293706251245	-0.415782244346267	-0.529819005348241	no
LOC105194453	QT	36.7252125665101	0.182227205719409	1.1287051691787	0.830770536410475	36.0902839714851	3QT	south_america	36.9210545078956	4.34051842920623	3.68412525878003	no
LOC105194453	QT	36.7252125665101	0.182227205719409	1.1287051691787	17.8744676819797	16.2442659206332	111BQT	south_america	34.1187336026129	-0.130319241241804	-0.276907075023531	no
LOC105194453	QT	36.7252125665101	0.182227205719409	1.1287051691787	15.7200024180494	14.5376158145553	112BQT	south_america	30.2576182326046	-0.105809911157968	-0.255192520370016	no
LOC105194453	QT	36.7252125665101	0.182227205719409	1.1287051691787	75.8044781614787	0	43QT	south_america	75.8044781614787	-6.26311852605525	-5.71038913241144	no
LOC105194453	W	21.0247385038629	0.127073279071061	1.3566622902154	18.8156779141484	14.1373696124454	112W	south_america	32.9530475265938	-0.388527791043788	-0.380051154833077	no
LOC105194453	W	21.0247385038629	0.127073279071061	1.3566622902154	7.78579775757864	5.01297097053631	3BW	south_america	12.7987687281149	-0.547095296566402	-0.496931757077456	no
LOC105194453	W	21.0247385038629	0.127073279071061	1.3566622902154	10.160898998846	15.1260748998136	114W	south_america	25.2869738986596	0.530942088598683	0.29769295751819	no
LOC105194453	W	21.0247385038629	0.127073279071061	1.3566622902154	9.25642076388237	12.5324274263408	104W	south_america	21.7888481902231	0.399893296945201	0.201096484985092	no
LOC105194453	W	21.0247385038629	0.127073279071061	1.3566622902154	9.1836883320297	11.076940485473	28W	south_america	20.2606288175027	0.245994843580871	0.0876574556302653	no
LOC105194453	W	21.0247385038629	0.127073279071061	1.3566622902154	19.3846458495777	0	43CW	south_america	19.3846458495777	-4.34941098742654	-3.29963049668527	no
LOC105194481	QA	2331.59130435578	0.297259275323424	1.07755291546055	1098.1304153669	1021.1302761398	112BQA	south_america	2119.2606915067	-0.104783489427868	-0.373107212632299	no
LOC105194481	QA	2331.59130435578	0.297259275323424	1.07755291546055	1103.63683213677	1440.28508506809	111BQA	south_america	2543.92191720487	0.383783590289139	0.0802970450214356	no
LOC105194481	QA	2331.59130435578	0.297259275323424	1.07755291546055	773.958132748096	773.958132748095	118QA	south_america	1547.91626549619	-1.12119927633522e-15	-0.275865130202331	no
LOC105194481	QA	2331.59130435578	0.297259275323424	1.07755291546055	3326.07791546316	2233.37155941791	43QA	south_america	5559.44947488106	-0.574386537239729	-0.80891230496148	no
LOC105194481	QA	2331.59130435578	0.297259275323424	1.07755291546055	1151.15230388727	1497.87572599625	3QA	south_america	2649.02802988351	0.379549331925654	0.0763675318599633	no
LOC105194481	QA	2331.59130435578	0.297259275323424	1.07755291546055	12.3656787914484	23.8095623422992	114CQA	south_america	36.1752411337477	0.892363176947496	0.552273482894086	no
LOC105194481	QH	2902.05517915227	-0.156919105199937	1.54693179210804	6551.11000062769	4604.33800542096	112BQH	south_america	11155.4480060486	-0.508652532232564	-0.227374877694712	no
LOC105194481	QH	2902.05517915227	-0.156919105199937	1.54693179210804	2604.23841919361	2047.01860171541	43QH	south_america	4651.25702090902	-0.347186588136723	-0.122996685379065	no
LOC105194481	QH	2902.05517915227	-0.156919105199937	1.54693179210804	907.1443252416	245.709012153912	3QH	south_america	1152.85333739551	-1.88011117600008	-1.11394185547891	no
LOC105194481	QH	2902.05517915227	-0.156919105199937	1.54693179210804	543.708210070908	378.572041242558	118QH	south_america	922.280251313466	-0.521109882918855	-0.235427818845605	no
LOC105194481	QH	2902.05517915227	-0.156919105199937	1.54693179210804	5804.26299899445	5679.78849872224	111BQH	south_america	11484.0514977167	-0.0312702367305851	0.0812245692475733	no
LOC105194481	QH	2902.05517915227	-0.156919105199937	1.54693179210804	55.1426806758994	36.3761096685903	114CQH	south_america	91.5187903444897	-0.586981538182628	-0.278009951813477	no
LOC105194481	QT	1403.19520628915	0.182227205719409	1.1287051691787	1006.91231369209	927.697184118416	43QT	south_america	1934.60949781051	-0.118089967107923	-0.266072293303891	no
LOC105194481	QT	1403.19520628915	0.182227205719409	1.1287051691787	1126.32665432896	1420.85483403666	111BQT	south_america	2547.18148836562	0.334868567203199	0.135235813259241	no
LOC105194481	QT	1403.19520628915	0.182227205719409	1.1287051691787	96.3492472500357	68.4123097155543	118QT	south_america	164.76155696559	-0.487978287525716	-0.593782602885393	no
LOC105194481	QT	1403.19520628915	0.182227205719409	1.1287051691787	17.5180449545519	12.6000198022255	114CQT	south_america	30.1180647567775	-0.44532304178225	-0.55599129395172	no
LOC105194481	QT	1403.19520628915	0.182227205719409	1.1287051691787	466.893041462687	404.887873305099	3QT	south_america	871.780914767786	-0.205097535657952	-0.343158472162573	no
LOC105194481	QT	1403.19520628915	0.182227205719409	1.1287051691787	1674.78487299987	1856.80444748665	112BQT	south_america	3531.58932048652	0.148761695049815	-0.0296494705468083	no
LOC105194481	W	4317.25681412043	0.127073279071061	1.3566622902154	2086.10493215496	2297.61169482914	104W	south_america	4383.7166269841	0.139259635871685	0.00898260155715648	no
LOC105194481	W	4317.25681412043	0.127073279071061	1.3566622902154	3237.59423419312	2209.1176690056	112W	south_america	5446.71190319872	-0.551244540880164	-0.499990177985657	no
LOC105194481	W	4317.25681412043	0.127073279071061	1.3566622902154	945.195331625411	769.765075670152	43CW	south_america	1714.96040729556	-0.29584684004596	-0.311735737159669	no
LOC105194481	W	4317.25681412043	0.127073279071061	1.3566622902154	2830.13748487984	1659.29339124752	3BW	south_america	4489.43087612735	-0.769943607246254	-0.66119394103222	no
LOC105194481	W	4317.25681412043	0.127073279071061	1.3566622902154	2109.62440541482	2141.17259584193	28W	south_america	4250.79700125675	0.0214048555708793	-0.0778885241097137	no
LOC105194481	W	4317.25681412043	0.127073279071061	1.3566622902154	138.557713620627	63.0253120825568	114W	south_america	201.583025703184	-1.12414758193977	-0.922278794092654	no
LOC105194510	QA	0.844788174593865	0.297259275323424	1.07755291546055	0.21627215993274	0.357568293214522	111BQA	south_america	0.573840453147262	0.15855868491541	-0.128718124574638	no
LOC105194510	QA	0.844788174593865	0.297259275323424	1.07755291546055	0	1.00259419410726	3QA	south_america	1.00259419410726	1.00187010289637	0.653899049840907	no
LOC105194510	QA	0.844788174593865	0.297259275323424	1.07755291546055	2.77115427241255	0.715136586429044	43QA	south_america	3.48629085884159	-1.13668269895645	-1.33073926459287	no
LOC105194510	QA	0.844788174593865	0.297259275323424	1.07755291546055	0.686982155080468	0	114CQA	south_america	0.686982155080468	-0.754444712858984	-0.976011454372901	no
LOC105194510	QA	0.844788174593865	0.297259275323424	1.07755291546055	0.215235283294178	0	112BQA	south_america	0.215235283294178	-0.281235662950139	-0.536859888710258	no
LOC105194510	QA	0.844788174593865	0.297259275323424	1.07755291546055	0.629746243082259	0.784152110180441	118QA	south_america	1.4138983532627	0.13059126980108	-0.154672687652755	no
LOC105194510	QH	4.82205052985186	-0.156919105199937	1.54693179210804	7.14286870268977	0	3QH	south_america	7.14286870268977	-3.02553714019678	-1.85439206151922	no
LOC105194510	QH	4.82205052985186	-0.156919105199937	1.54693179210804	2.50648548526815	2.2735068542869	114CQH	south_america	4.77999233955505	-0.0991887563966214	0.0373192593867666	no
LOC105194510	QH	4.82205052985186	-0.156919105199937	1.54693179210804	2.72820822514428	0	111BQH	south_america	2.72820822514428	-1.89848243858497	-1.12581779123679	no
LOC105194510	QH	4.82205052985186	-0.156919105199937	1.54693179210804	3.41026028143035	1.45384843871833	112BQH	south_america	4.86410872014868	-0.845817658102615	-0.445332209485398	no
LOC105194510	QH	4.82205052985186	-0.156919105199937	1.54693179210804	5.01297097053631	0	43QH	south_america	5.01297097053631	-2.58807799349749	-1.57160057133777	no
LOC105194510	QH	4.82205052985186	-0.156919105199937	1.54693179210804	0	1.19047811711496	118QH	south_america	1.19047811711496	1.1312458022037	0.832722498804053	no
LOC105194510	QT	1.39211656148087	0.182227205719409	1.1287051691787	0	0	114CQT	south_america	0	0	-0.161448012018946	no
LOC105194510	QT	1.39211656148087	0.182227205719409	1.1287051691787	1.75180449545519	1.17952258130266	118QT	south_america	2.93132707675785	-0.336365825002575	-0.45945836422397	no
LOC105194510	QT	1.39211656148087	0.182227205719409	1.1287051691787	1.43027317285809	0.852662853050014	43QT	south_america	2.2829360259081	-0.391518123793206	-0.50832169921761	no
LOC105194510	QT	1.39211656148087	0.182227205719409	1.1287051691787	0.830770536410475	2.25564274821782	3QT	south_america	3.0864132846283	0.830491417726206	0.57434326492764	no
LOC105194510	QT	1.39211656148087	0.182227205719409	1.1287051691787	0	0.501297097053631	112BQT	south_america	0.501297097053631	0.586209505294724	0.357916584956613	no
LOC105194510	QT	1.39211656148087	0.182227205719409	1.1287051691787	0.235190364236576	0	111BQT	south_america	0.235190364236576	-0.304733403247833	-0.431432957219092	no
LOC105194510	W	1.15692035911773	0.127073279071061	1.3566622902154	0.437318492001414	0.55384702427365	28W	south_america	0.991165516275064	0.112464697288836	-0.0107680311361094	no
LOC105194510	W	1.15692035911773	0.127073279071061	1.3566622902154	0	0	114W	south_america	0	0	-0.093666109825228	no
LOC105194510	W	1.15692035911773	0.127073279071061	1.3566622902154	0	0.614668244019367	112W	south_america	0.614668244019367	0.691237773665631	0.415847406287823	no
LOC105194510	W	1.15692035911773	0.127073279071061	1.3566622902154	1.55077166796622	0	43CW	south_america	1.55077166796622	-1.35093376203875	-1.08944359386237	no
LOC105194510	W	1.15692035911773	0.127073279071061	1.3566622902154	0.487180040204335	0.835495161756051	104W	south_america	1.32267520196039	0.303589998845666	0.130111023979726	no
LOC105194510	W	1.15692035911773	0.127073279071061	1.3566622902154	3.89289887878932	0	3BW	south_america	3.89289887878932	-2.29068946699808	-1.78214045124323	no
LOC105194585	QA	14.1311713353713	0.297259275323424	1.07755291546055	10.6096986533388	23.059666464467	3QA	south_america	33.6693651178059	1.05128611735299	0.699758528060124	no
LOC105194585	QA	14.1311713353713	0.297259275323424	1.07755291546055	3.43491077540234	7.14286870268977	114CQA	south_america	10.5777794780921	0.876632060513604	0.537674555817573	no
LOC105194585	QA	14.1311713353713	0.297259275323424	1.07755291546055	6.27189263804946	10.7270487964357	111BQA	south_america	16.9989414344851	0.689437188644044	0.363952347670093	no
LOC105194585	QA	14.1311713353713	0.297259275323424	1.07755291546055	3.77847745849355	7.05736899162397	118QA	south_america	10.8358464501175	0.753757813070475	0.423643731270444	no
LOC105194585	QA	14.1311713353713	0.297259275323424	1.07755291546055	9.47035246494385	7.66574631324211	112BQA	south_america	17.136098778186	-0.272914100794748	-0.529137240443064	no
LOC105194585	QA	14.1311713353713	0.297259275323424	1.07755291546055	5.54230854482509	5.72109269143235	43QA	south_america	11.2634012362574	0.038895999689262	-0.239768527305908	no
LOC105194585	QH	7.2864778248232	-0.156919105199937	1.54693179210804	0	3.41026028143035	111BQH	south_america	3.41026028143035	2.14086380218821	1.48538088046979	no
LOC105194585	QH	7.2864778248232	-0.156919105199937	1.54693179210804	5.01297097053631	4.54701370857379	114CQH	south_america	9.5599846791101	-0.116366702635454	0.0262147321371041	no
LOC105194585	QH	7.2864778248232	-0.156919105199937	1.54693179210804	5.19053183838576	5.95239058557481	118QH	south_america	11.1429224239606	0.16744577611513	0.209682730014261	no
LOC105194585	QH	7.2864778248232	-0.156919105199937	1.54693179210804	28.5714748107591	9.23718090804182	3QH	south_america	37.8086557188009	-1.53038771252157	-0.887866300459165	no
LOC105194585	QH	7.2864778248232	-0.156919105199937	1.54693179210804	5.01297097053631	0	43QH	south_america	5.01297097053631	-2.58807799349749	-1.57160057133777	no
LOC105194585	QH	7.2864778248232	-0.156919105199937	1.54693179210804	1.70513014071517	0	112BQH	south_america	1.70513014071517	-1.43569800212899	-0.826654997623675	no
LOC105194585	QT	13.5762113670831	0.182227205719409	1.1287051691787	14.9538696553886	22.5564274821782	3QT	south_america	37.5102971375668	0.562214363564527	0.336657586251347	no
LOC105194585	QT	13.5762113670831	0.182227205719409	1.1287051691787	11.678696636368	7.7538583398311	114CQT	south_america	19.4325549761991	-0.534415502050953	-0.634924626323654	no
LOC105194585	QT	13.5762113670831	0.182227205719409	1.1287051691787	5.83934831818398	6.48737419716463	118QT	south_america	12.3267225153486	0.130600992327275	-0.0457393257352579	no
LOC105194585	QT	13.5762113670831	0.182227205719409	1.1287051691787	8.58163903714853	5.11597711830009	43QT	south_america	13.6976161554486	-0.647689455627581	-0.735282059486694	no
LOC105194585	QT	13.5762113670831	0.182227205719409	1.1287051691787	4.83692382093826	5.01297097053631	112BQT	south_america	9.84989479147457	0.0428697541058087	-0.123466654905996	no
LOC105194585	QT	13.5762113670831	0.182227205719409	1.1287051691787	4.46861692049493	8.98618965822261	111BQT	south_america	13.4548065787175	0.868758302578127	0.608246613558324	no
LOC105194585	W	8.62514891596154	0.127073279071061	1.3566622902154	3.89289887878932	12.5324274263408	3BW	south_america	16.4253263051301	1.46765927886894	0.988150116257035	no
LOC105194585	W	8.62514891596154	0.127073279071061	1.3566622902154	6.20308667186488	9.85299296857795	43CW	south_america	16.0560796404428	0.591405785816106	0.342260937076185	no
LOC105194585	W	8.62514891596154	0.127073279071061	1.3566622902154	1.84743618160836	5.04202496660454	114W	south_america	6.8894611482129	1.08536863774518	0.706362493883405	no
LOC105194585	W	8.62514891596154	0.127073279071061	1.3566622902154	5.19053183838576	4.91734595215493	112W	south_america	10.1078777905407	-0.0651131155937052	-0.141661190150905	no
LOC105194585	W	8.62514891596154	0.127073279071061	1.3566622902154	4.37318492001414	2.76923512136825	28W	south_america	7.14242004138239	-0.51150569796822	-0.470698553092306	no
LOC105194585	W	8.62514891596154	0.127073279071061	1.3566622902154	1.94872016081734	4.17747580878025	104W	south_america	6.1261959695976	0.812159993240861	0.504979550998671	no
LOC105194616	QA	0.81617021859476	0.297259275323424	1.07755291546055	0	0.357568293214522	111BQA	south_america	0.357568293214522	0.441024775417237	0.133418505978769	no
LOC105194616	QA	0.81617021859476	0.297259275323424	1.07755291546055	0	1.00259419410726	3QA	south_america	1.00259419410726	1.00187010289637	0.653899049840907	no
LOC105194616	QA	0.81617021859476	0.297259275323424	1.07755291546055	0.215235283294178	0	112BQA	south_america	0.215235283294178	-0.281235662950139	-0.536859888710258	no
LOC105194616	QA	0.81617021859476	0.297259275323424	1.07755291546055	0.686982155080468	1.19047811711496	114CQA	south_america	1.87746027219543	0.376801089344715	0.0738170839501603	no
LOC105194616	QA	0.81617021859476	0.297259275323424	1.07755291546055	0.629746243082259	0	118QA	south_america	0.629746243082259	-0.70464734951994	-0.929798073457162	no
LOC105194616	QA	0.81617021859476	0.297259275323424	1.07755291546055	1.38557713620627	0	43QA	south_america	1.38557713620627	-1.2543383357555	-1.43992706883984	no
LOC105194616	QH	2.10580781299166	-0.156919105199937	1.54693179210804	0	0	43QH	south_america	0	0	0.10143892962863	no
LOC105194616	QH	2.10580781299166	-0.156919105199937	1.54693179210804	2.50648548526815	0	114CQH	south_america	2.50648548526815	-1.81002575613728	-1.06863577267658	no
LOC105194616	QH	2.10580781299166	-0.156919105199937	1.54693179210804	1.70513014071517	1.45384843871833	112BQH	south_america	3.1589785794335	-0.140651858043397	0.0105158141034599	no
LOC105194616	QH	2.10580781299166	-0.156919105199937	1.54693179210804	3.57143435134488	0	3QH	south_america	3.57143435134488	-2.19264690202237	-1.31597773554599	no
LOC105194616	QH	2.10580781299166	-0.156919105199937	1.54693179210804	0	1.70513014071517	111BQH	south_america	1.70513014071517	1.43569800212899	1.02953285688093	no
LOC105194616	QH	2.10580781299166	-0.156919105199937	1.54693179210804	1.29763295959644	0	118QH	south_america	1.29763295959644	-1.20014834991483	-0.674386065395461	no
LOC105194616	QT	0.710265913530903	0.182227205719409	1.1287051691787	0.830770536410475	0	3QT	south_america	0.830770536410475	-0.872450979159287	-0.93441424180429	no
LOC105194616	QT	0.710265913530903	0.182227205719409	1.1287051691787	0.235190364236576	0	111BQT	south_america	0.235190364236576	-0.304733403247833	-0.431432957219092	no
LOC105194616	QT	0.710265913530903	0.182227205719409	1.1287051691787	0	0.852662853050014	43QT	south_america	0.852662853050014	0.889600364102586	0.626712074773164	no
LOC105194616	QT	0.710265913530903	0.182227205719409	1.1287051691787	0	0.501297097053631	112BQT	south_america	0.501297097053631	0.586209505294724	0.357916584956613	no
LOC105194616	QT	0.710265913530903	0.182227205719409	1.1287051691787	0	0.58976129065133	118QT	south_america	0.58976129065133	0.668810155039405	0.431098361739636	no
LOC105194616	QT	0.710265913530903	0.182227205719409	1.1287051691787	0	0.969232292478887	114CQT	south_america	0.969232292478887	0.97763330293098	0.704706701919641	no
LOC105194616	W	0.879606626280116	0.127073279071061	1.3566622902154	0.64881647979822	0.614668244019367	112W	south_america	1.26348472381759	-0.0301930560259896	-0.115921505470666	no
LOC105194616	W	0.879606626280116	0.127073279071061	1.3566622902154	0	0.835495161756051	104W	south_america	0.835495161756051	0.876169311593684	0.552161018939864	no
LOC105194616	W	0.879606626280116	0.127073279071061	1.3566622902154	0.77538583398311	0	43CW	south_america	0.77538583398311	-0.828132590974476	-0.704085222191795	no
LOC105194616	W	0.879606626280116	0.127073279071061	1.3566622902154	0	0.55384702427365	28W	south_america	0.55384702427365	0.635844477886412	0.375016835423777	no
LOC105194616	W	0.879606626280116	0.127073279071061	1.3566622902154	0	2.50648548526815	3BW	south_america	2.50648548526815	1.81002575613728	1.24050951309262	no
LOC105194616	W	0.879606626280116	0.127073279071061	1.3566622902154	0.923718090804182	0	114W	south_america	0.923718090804182	-0.943897396406448	-0.789415820872763	no
LOC105194672	QA	47.5730871682365	0.297259275323424	1.07755291546055	22.1692341793004	32.7776738911042	112BQA	south_america	54.9469080704046	0.543859620871979	0.228852190932227	no
LOC105194672	QA	47.5730871682365	0.297259275323424	1.07755291546055	22.1692341793004	22.1692341793004	43QA	south_america	44.3384683586007	0	-0.27586513020233	no
LOC105194672	QA	47.5730871682365	0.297259275323424	1.07755291546055	0.686982155080468	1.19047811711496	114CQA	south_america	1.87746027219543	0.376801089344715	0.0738170839501603	no
LOC105194672	QA	47.5730871682365	0.297259275323424	1.07755291546055	52.2689381758275	59.5955603737135	118QA	south_america	111.864498549541	0.185917572759755	-0.103328292250113	no
LOC105194672	QA	47.5730871682365	0.297259275323424	1.07755291546055	22.735068542869	28.0726374350033	3QA	south_america	50.8077059778723	0.292641740952079	-0.00428520428564889	no
LOC105194672	QA	47.5730871682365	0.297259275323424	1.07755291546055	3.46035455892384	22.1692341793004	111BQA	south_america	25.6295887382242	2.37698005772079	1.93004051360994	no
LOC105194672	QH	33.5268271262474	-0.156919105199937	1.54693179210804	10.0259419410726	11.6307875097466	43QH	south_america	21.6567294508193	0.196042681886229	0.228168939889184	no
LOC105194672	QH	33.5268271262474	-0.156919105199937	1.54693179210804	35.7143435134488	22.1692341793004	3QH	south_america	57.8835776927492	-0.664133444383213	-0.327884100495526	no
LOC105194672	QH	33.5268271262474	-0.156919105199937	1.54693179210804	6.82052056286069	17.44618126462	112BQH	south_america	24.2667018274807	1.23798563295135	0.901723492443334	no
LOC105194672	QH	33.5268271262474	-0.156919105199937	1.54693179210804	5.45641645028855	10.230780844291	111BQH	south_america	15.6871972945796	0.798652694600661	0.617720706676033	no
LOC105194672	QH	33.5268271262474	-0.156919105199937	1.54693179210804	20.0518838821452	22.735068542869	114CQH	south_america	42.7869524250142	0.173070873676337	0.2133190232173	no
LOC105194672	QH	33.5268271262474	-0.156919105199937	1.54693179210804	38.9289887878932	40.4762559819087	118QH	south_america	79.4052447698019	0.0548491336581297	0.136895653666466	no
LOC105194672	QT	58.3762387491862	0.182227205719409	1.1287051691787	24.930178609077	34.5622679162408	111BQT	south_america	59.4924465253178	0.45571518862313	0.24230241020578	no
LOC105194672	QT	58.3762387491862	0.182227205719409	1.1287051691787	22.1692341793004	22.1692341793004	43QT	south_america	44.3384683586007	-1.60171325190746e-16	-0.161448012018946	no
LOC105194672	QT	58.3762387491862	0.182227205719409	1.1287051691787	122.042379850045	99.0798968294234	118QT	south_america	221.122276679469	-0.29800310550292	-0.425470108878627	no
LOC105194672	QT	58.3762387491862	0.182227205719409	1.1287051691787	22.1692341793004	35.0907967937541	112BQT	south_america	57.2600309730545	0.639420635560715	0.4050601010129	no
LOC105194672	QT	58.3762387491862	0.182227205719409	1.1287051691787	15.1823056272783	30.0462010668455	114CQT	south_america	45.2285066941239	0.939999570365356	0.671364307826587	no
LOC105194672	QT	58.3762387491862	0.182227205719409	1.1287051691787	43.2000678933447	49.6241404607921	3QT	south_america	92.8242083541368	0.195776922138947	0.0120046552364048	no
LOC105194672	W	33.8462007175322	0.127073279071061	1.3566622902154	6.4881647979822	13.5227013684261	112W	south_america	20.0108661664083	0.955625743156285	0.610728602144367	no
LOC105194672	W	33.8462007175322	0.127073279071061	1.3566622902154	12.4061733437298	22.1692341793004	43CW	south_america	34.5754075230301	0.789312865763174	0.488138862168101	no
LOC105194672	W	33.8462007175322	0.127073279071061	1.3566622902154	15.5715955151573	17.5453983968771	3BW	south_america	33.1169939120344	0.162348748414658	0.0260016583331114	no
LOC105194672	W	33.8462007175322	0.127073279071061	1.3566622902154	22.1692341793004	35.2941747662318	114W	south_america	57.4634089455322	0.647527654409801	0.383628541231222	no
LOC105194672	W	33.8462007175322	0.127073279071061	1.3566622902154	31.4869314241018	37.6615976506082	28W	south_america	69.14852907471	0.251041777333527	0.0913775662200973	no
LOC105194672	W	33.8462007175322	0.127073279071061	1.3566622902154	11.692320964904	18.3808935586331	104W	south_america	30.0732145235372	0.610679178058789	0.356467414533168	no
LOC105194675	QA	33.0670712703688	0.297259275323424	1.07755291546055	3.65899981600103	8.45875455254302	112BQA	south_america	12.1177543685441	1.02162996092392	0.67223676462413	no
LOC105194675	QA	33.0670712703688	0.297259275323424	1.07755291546055	13.2246711047274	18.0354985341501	118QA	south_america	31.2601696388776	0.420297058466164	0.11418259036509	no
LOC105194675	QA	33.0670712703688	0.297259275323424	1.07755291546055	17.3197142025784	17.1632780742971	43QA	south_america	34.4829922768755	-0.012372395771997	-0.287347068206933	no
LOC105194675	QA	33.0670712703688	0.297259275323424	1.07755291546055	11.678696636368	23.8095623422992	114CQA	south_america	35.4882589786672	0.968489840548685	0.622921209338826	no
LOC105194675	QA	33.0670712703688	0.297259275323424	1.07755291546055	16.6723835981039	17.0441012998234	3QA	south_america	33.7164848979273	0.0300306511075899	-0.247995824967557	no
LOC105194675	QA	33.0670712703688	0.297259275323424	1.07755291546055	11.678696636368	20.7389610064423	111BQA	south_america	32.4176576428102	0.777876544960456	0.446026605971008	no
LOC105194675	QH	13.3174326541281	-0.156919105199937	1.54693179210804	11.678696636368	15.4762155224945	118QH	south_america	27.1549121588625	0.377978458307995	0.345779669302042	no
LOC105194675	QH	13.3174326541281	-0.156919105199937	1.54693179210804	10.7143030540346	1.84743618160836	3QH	south_america	12.561739235643	-2.04053571029102	-1.21764683788949	no
LOC105194675	QH	13.3174326541281	-0.156919105199937	1.54693179210804	10.0259419410726	27.2820822514428	114CQH	south_america	37.3080241925154	1.35898643180833	0.979943359327116	no
LOC105194675	QH	13.3174326541281	-0.156919105199937	1.54693179210804	5.11539042214552	5.81539375487333	112BQH	south_america	10.9307841770188	0.156352403162088	0.202511519874527	no
LOC105194675	QH	13.3174326541281	-0.156919105199937	1.54693179210804	7.51945645580446	5.81539375487332	43QH	south_america	13.3348502106778	-0.321964378765402	-0.106692017325828	no
LOC105194675	QH	13.3174326541281	-0.156919105199937	1.54693179210804	1.36410411257214	11.9359109850062	111BQH	south_america	13.3000150975783	2.45201617969373	1.68652250745873	no
LOC105194675	QT	20.4367778584031	0.182227205719409	1.1287051691787	14.9538696553886	10.1503923669802	3QT	south_america	25.1042620223688	-0.516811918629546	-0.619328362656132	no
LOC105194675	QT	20.4367778584031	0.182227205719409	1.1287051691787	4.43384683586007	5.01297097053631	112BQT	south_america	9.44681780639638	0.146104092689043	-0.0320040290562778	no
LOC105194675	QT	20.4367778584031	0.182227205719409	1.1287051691787	4.70380728473151	10.7143030540346	111BQT	south_america	15.4181103387662	1.0382739799857	0.758432580661602	no
LOC105194675	QT	20.4367778584031	0.182227205719409	1.1287051691787	11.678696636368	5.81539375487332	114CQT	south_america	17.4940903912413	-0.895537529471607	-0.954868254900659	no
LOC105194675	QT	20.4367778584031	0.182227205719409	1.1287051691787	11.4421853828647	11.9372799427002	43QT	south_america	23.3794653255649	0.0562944162069725	-0.11157279416384	no
LOC105194675	QT	20.4367778584031	0.182227205719409	1.1287051691787	11.678696636368	14.7440322662833	118QT	south_america	26.4227289026512	0.312398637718685	0.115328108308386	no
LOC105194675	W	26.2907441529905	0.127073279071061	1.3566622902154	11.678696636368	11.678696636368	112W	south_america	23.3573932727359	0	-0.093666109825228	no
LOC105194675	W	26.2907441529905	0.127073279071061	1.3566622902154	10.0800158417804	19.7059859371559	43CW	south_america	29.7860017789363	0.902087955676728	0.571265732227745	no
LOC105194675	W	26.2907441529905	0.127073279071061	1.3566622902154	11.678696636368	17.5453983968771	3BW	south_america	29.224095033245	0.548654815732941	0.31074906386242	no
LOC105194675	W	26.2907441529905	0.127073279071061	1.3566622902154	12.1795010051084	10.8614371028287	104W	south_america	23.040938107937	-0.152016934976948	-0.205718266115953	no
LOC105194675	W	26.2907441529905	0.127073279071061	1.3566622902154	14.7794894528669	17.6470873831159	114W	south_america	32.4265768359828	0.240899776064203	0.0839018654930481	no
LOC105194675	W	26.2907441529905	0.127073279071061	1.3566622902154	8.30905134802687	11.6307875097466	28W	south_america	19.9398388577735	0.440238531178016	0.230835082809911	no
LOC105194700	QA	0.10813607996637	0.297259275323424	1.07755291546055	0.21627215993274	0	111BQA	south_america	0.21627215993274	-0.282466090501827	-0.538001760755736	no
LOC105194700	QA	0.10813607996637	0.297259275323424	1.07755291546055	0	0.264336079766969	112BQA	south_america	0.264336079766969	0.338380004785408	0.0381612159105972	no
LOC105194700	QA	0.10813607996637	0.297259275323424	1.07755291546055	0	0	118QA	south_america	0	0	-0.27586513020233	no
LOC105194700	QA	0.10813607996637	0.297259275323424	1.07755291546055	0	0	43QA	south_america	0	0	-0.27586513020233	no
LOC105194700	QA	0.10813607996637	0.297259275323424	1.07755291546055	0.686982155080468	0	114CQA	south_america	0.686982155080468	-0.754444712858984	-0.976011454372901	no
LOC105194700	QA	0.10813607996637	0.297259275323424	1.07755291546055	0	0	3QA	south_america	0	0	-0.27586513020233	no
LOC105194700	QH	0.726924219359166	-0.156919105199937	1.54693179210804	0	4.54701370857379	114CQH	south_america	4.54701370857379	2.47171129086204	1.69925423310351	no
LOC105194700	QH	0.726924219359166	-0.156919105199937	1.54693179210804	0	0	118QH	south_america	0	0	0.10143892962863	no
LOC105194700	QH	0.726924219359166	-0.156919105199937	1.54693179210804	0	1.70513014071517	111BQH	south_america	1.70513014071517	1.43569800212899	1.02953285688093	no
LOC105194700	QH	0.726924219359166	-0.156919105199937	1.54693179210804	0	0	43QH	south_america	0	0	0.10143892962863	no
LOC105194700	QH	0.726924219359166	-0.156919105199937	1.54693179210804	0	1.45384843871833	112BQH	south_america	1.45384843871833	1.2950461440856	0.938609741355765	no
LOC105194700	QH	0.726924219359166	-0.156919105199937	1.54693179210804	0	0	3QH	south_america	0	0	0.10143892962863	no
LOC105194700	QT	0.676979975051823	0.182227205719409	1.1287051691787	0	0	111BQT	south_america	0	0	-0.161448012018946	no
LOC105194700	QT	0.676979975051823	0.182227205719409	1.1287051691787	0	0.501297097053631	112BQT	south_america	0.501297097053631	0.586209505294724	0.357916584956613	no
LOC105194700	QT	0.676979975051823	0.182227205719409	1.1287051691787	0	1.12782137410891	3QT	south_america	1.12782137410891	1.0893770448693	0.8037084120116	no
LOC105194700	QT	0.676979975051823	0.182227205719409	1.1287051691787	0	0.969232292478887	114CQT	south_america	0.969232292478887	0.97763330293098	0.704706701919641	no
LOC105194700	QT	0.676979975051823	0.182227205719409	1.1287051691787	0	0	118QT	south_america	0	0	-0.161448012018946	no
LOC105194700	QT	0.676979975051823	0.182227205719409	1.1287051691787	0	0.852662853050014	43QT	south_america	0.852662853050014	0.889600364102586	0.626712074773164	no
LOC105194700	W	1.03355964141415	0.127073279071061	1.3566622902154	0	0.614668244019367	112W	south_america	0.614668244019367	0.691237773665631	0.415847406287823	no
LOC105194700	W	1.03355964141415	0.127073279071061	1.3566622902154	0.437318492001414	0	28W	south_america	0.437318492001414	-0.523379780597576	-0.479450976385114	no
LOC105194700	W	1.03355964141415	0.127073279071061	1.3566622902154	0	5.01297097053631	3BW	south_america	5.01297097053631	2.58807799349749	1.81401424081427	no
LOC105194700	W	1.03355964141415	0.127073279071061	1.3566622902154	0	1.23162412107224	43CW	south_america	1.23162412107224	1.15809405031617	0.759968622022668	no
LOC105194700	W	1.03355964141415	0.127073279071061	1.3566622902154	0	0.835495161756051	104W	south_america	0.835495161756051	0.876169311593684	0.552161018939864	no
LOC105194700	W	1.03355964141415	0.127073279071061	1.3566622902154	0.923718090804182	1.26050624165114	114W	south_america	2.18422433245532	0.232748504788028	0.0778935380448949	no
LOC105194738	QA	0.749644348304743	0.297259275323424	1.07755291546055	0	0.784152110180441	118QA	south_america	0.784152110180441	0.83523861932102	0.499260255602077	no
LOC105194738	QA	0.749644348304743	0.297259275323424	1.07755291546055	0	3.00778258232178	3QA	south_america	3.00778258232178	2.00280424607951	1.58279463243542	no
LOC105194738	QA	0.749644348304743	0.297259275323424	1.07755291546055	0	0.715136586429044	43QA	south_america	0.715136586429044	0.778323471277037	0.446441366406592	no
LOC105194738	QA	0.749644348304743	0.297259275323424	1.07755291546055	0.215235283294178	0.264336079766969	112BQA	south_america	0.479571363061148	0.0571443418352689	-0.222833542597331	no
LOC105194738	QA	0.749644348304743	0.297259275323424	1.07755291546055	0	0.715136586429044	111BQA	south_america	0.715136586429044	0.778323471277037	0.446441366406592	no
LOC105194738	QA	0.749644348304743	0.297259275323424	1.07755291546055	1.37396431016094	0	114CQA	south_america	1.37396431016094	-1.24729824587246	-1.4333936635824	no
LOC105194738	QH	2.10580781299166	-0.156919105199937	1.54693179210804	0	0	118QH	south_america	0	0	0.10143892962863	no
LOC105194738	QH	2.10580781299166	-0.156919105199937	1.54693179210804	1.36410411257214	1.70513014071517	111BQH	south_america	3.06923425328731	0.194404430495068	0.2271099071642	no
LOC105194738	QH	2.10580781299166	-0.156919105199937	1.54693179210804	0	0	114CQH	south_america	0	0	0.10143892962863	no
LOC105194738	QH	2.10580781299166	-0.156919105199937	1.54693179210804	7.14286870268977	0	3QH	south_america	7.14286870268977	-3.02553714019678	-1.85439206151922	no
LOC105194738	QH	2.10580781299166	-0.156919105199937	1.54693179210804	1.70513014071517	0	112BQH	south_america	1.70513014071517	-1.43569800212899	-0.826654997623675	no
LOC105194738	QH	2.10580781299166	-0.156919105199937	1.54693179210804	2.50648548526815	0	43QH	south_america	2.50648548526815	-1.81002575613728	-1.06863577267658	no
LOC105194738	QT	0.837496609761679	0.182227205719409	1.1287051691787	0	0.345622679162408	111BQT	south_america	0.345622679162408	0.42827392613332	0.217990248589848	no
LOC105194738	QT	0.837496609761679	0.182227205719409	1.1287051691787	0	0.501297097053631	112BQT	south_america	0.501297097053631	0.586209505294724	0.357916584956613	no
LOC105194738	QT	0.837496609761679	0.182227205719409	1.1287051691787	1.1678696636368	1.93846458495777	114CQT	south_america	3.10633424859457	0.438784488958001	0.227302302004407	no
LOC105194738	QT	0.837496609761679	0.182227205719409	1.1287051691787	0.583934831818398	0.58976129065133	118QT	south_america	1.17369612246973	0.00529717552244512	-0.156754868346804	no
LOC105194738	QT	0.837496609761679	0.182227205719409	1.1287051691787	1.66154107282095	1.12782137410891	3QT	south_america	2.78936244692986	-0.322884785191909	-0.447514554468518	no
LOC105194738	QT	0.837496609761679	0.182227205719409	1.1287051691787	0	0	43QT	south_america	0	0	-0.161448012018946	no
LOC105194738	W	0.811588280103445	0.127073279071061	1.3566622902154	0	0	3BW	south_america	0	0	-0.093666109825228	no
LOC105194738	W	0.811588280103445	0.127073279071061	1.3566622902154	0	0	28W	south_america	0	0	-0.093666109825228	no
LOC105194738	W	0.811588280103445	0.127073279071061	1.3566622902154	0	2.52101248330227	114W	south_america	2.52101248330227	1.81599034210203	1.24490602798639	no
LOC105194738	W	0.811588280103445	0.127073279071061	1.3566622902154	0.64881647979822	0	112W	south_america	0.64881647979822	-0.721430829691621	-0.625435021583717	no
LOC105194738	W	0.811588280103445	0.127073279071061	1.3566622902154	1.55077166796622	3.69487236321673	43CW	south_america	5.24564403118295	0.880152174656638	0.555096799709831	no
LOC105194738	W	0.811588280103445	0.127073279071061	1.3566622902154	0.97436008040867	0	104W	south_america	0.97436008040867	-0.981385130040271	-0.817048146105206	no
LOC105194763	QA	17.9229255032007	0.297259275323424	1.07755291546055	21.2964468074945	21.4286061080693	114CQA	south_america	42.7250529155638	0.00852614407624452	-0.267952624047029	no
LOC105194763	QA	17.9229255032007	0.297259275323424	1.07755291546055	12.4701942258565	2.86054634571618	43QA	south_america	15.3307405715726	-1.80289371537223	-1.94900218872133	no
LOC105194763	QA	17.9229255032007	0.297259275323424	1.07755291546055	7.5569549169871	9.40982532216529	118QA	south_america	16.9667802391524	0.282776465523636	-0.0134404627299424	no
LOC105194763	QA	17.9229255032007	0.297259275323424	1.07755291546055	10.5465288814147	14.2741483074163	112BQA	south_america	24.8206771888311	0.403632723336602	0.09871760958274	no
LOC105194763	QA	17.9229255032007	0.297259275323424	1.07755291546055	6.82052056286069	10.0259419410726	3QA	south_america	16.8464625039333	0.495565362836032	0.1840337348332	no
LOC105194763	QA	17.9229255032007	0.297259275323424	1.07755291546055	8.86715855724234	10.0119122100066	111BQA	south_america	18.879070767249	0.158358416396603	-0.128903979501977	no
LOC105194763	QH	18.735446581216	-0.156919105199937	1.54693179210804	10.0259419410726	9.09402741714759	114CQH	south_america	19.1199693582202	-0.127399999444582	0.0190823576746901	no
LOC105194763	QH	18.735446581216	-0.156919105199937	1.54693179210804	6.4881647979822	4.76191246845985	118QH	south_america	11.250077266442	-0.378064441703759	-0.142957393229641	no
LOC105194763	QH	18.735446581216	-0.156919105199937	1.54693179210804	12.2769370131492	10.230780844291	111BQH	south_america	22.5077178574403	-0.241464117884577	-0.0546533551873211	no
LOC105194763	QH	18.735446581216	-0.156919105199937	1.54693179210804	17.0513014071517	11.6307875097467	112BQH	south_america	28.6820889168984	-0.515158260149491	-0.231580446388896	no
LOC105194763	QH	18.735446581216	-0.156919105199937	1.54693179210804	10.0259419410726	2.90769687743666	43QH	south_america	12.9336388185093	-1.49651144383567	-0.865967294401679	no
LOC105194763	QH	18.735446581216	-0.156919105199937	1.54693179210804	3.57143435134488	14.7794894528669	3QH	south_america	18.3509238042118	1.78733172041327	1.25684327876133	no
LOC105194763	QT	20.5919593109888	0.182227205719409	1.1287051691787	11.678696636368	10.0259419410726	118QT	south_america	21.7046385774406	-0.201504534964362	-0.339975177896096	no
LOC105194763	QT	20.5919593109888	0.182227205719409	1.1287051691787	9.67384764187652	10.0259419410726	112BQT	south_america	19.6997895829491	0.0468215862035826	-0.119965446436605	no
LOC105194763	QT	20.5919593109888	0.182227205719409	1.1287051691787	17.1632780742971	1.70532570610003	43QT	south_america	18.8686037803971	-2.74715039897394	-2.5953434826784	no
LOC105194763	QT	20.5919593109888	0.182227205719409	1.1287051691787	6.11494947015096	5.87558554576094	111BQT	south_america	11.9905350159119	-0.0493709278228883	-0.20518922023793	no
LOC105194763	QT	20.5919593109888	0.182227205719409	1.1287051691787	12.4615580461571	9.02257099287129	3QT	south_america	21.4841290390284	-0.425592761152064	-0.538510838320828	no
LOC105194763	QT	20.5919593109888	0.182227205719409	1.1287051691787	11.678696636368	13.5692520947044	114CQT	south_america	25.2479487310724	0.200520374496506	0.0162072162657041	no
LOC105194763	W	17.2770539143729	0.127073279071061	1.3566622902154	11.678696636368	7.3760189282324	112W	south_america	19.0547155646004	-0.598069837170475	-0.534505249737874	no
LOC105194763	W	17.2770539143729	0.127073279071061	1.3566622902154	7.87173285602546	8.8615523883784	28W	south_america	16.7332852444039	0.152598847029552	0.0188149756520754	no
LOC105194763	W	17.2770539143729	0.127073279071061	1.3566622902154	10.0800158417804	2.46324824214449	43CW	south_america	12.5432640839249	-1.6777622368174	-1.33034988066331	no
LOC105194763	W	17.2770539143729	0.127073279071061	1.3566622902154	6.46602663562927	10.0840499332091	114W	south_america	16.5500765688384	0.570072554541743	0.326536145852737	no
LOC105194763	W	17.2770539143729	0.127073279071061	1.3566622902154	15.5715955151573	10.0259419410726	3BW	south_america	25.5975374562299	-0.587810602282645	-0.52694313574545	no
LOC105194763	W	17.2770539143729	0.127073279071061	1.3566622902154	7.79488064326936	10.0259419410726	104W	south_america	17.820822584342	0.326166005913681	0.146751869111811	no
LOC105195673	QA	0.689885361591803	0.297259275323424	1.07755291546055	0.686982155080468	0	114CQA	south_america	0.686982155080468	-0.754444712858984	-0.976011454372901	no
LOC105195673	QA	0.689885361591803	0.297259275323424	1.07755291546055	0.757835618095632	0	3QA	south_america	0.757835618095632	-0.813800164880386	-1.03109501562524	no
LOC105195673	QA	0.689885361591803	0.297259275323424	1.07755291546055	0.692788568103137	0	43QA	south_america	0.692788568103137	-0.75940178965543	-0.980611763764044	no
LOC105195673	QA	0.689885361591803	0.297259275323424	1.07755291546055	1.25949248616452	0	118QA	south_america	1.25949248616452	-1.17599875940271	-1.36722569591533	no
LOC105195673	QA	0.689885361591803	0.297259275323424	1.07755291546055	0.215235283294178	0	112BQA	south_america	0.215235283294178	-0.281235662950139	-0.536859888710258	no
LOC105195673	QA	0.689885361591803	0.297259275323424	1.07755291546055	0.21627215993274	0.357568293214522	111BQA	south_america	0.573840453147262	0.15855868491541	-0.128718124574638	no
LOC105195673	QH	1.77628316116177	-0.156919105199937	1.54693179210804	2.50648548526815	0	43QH	south_america	2.50648548526815	-1.81002575613728	-1.06863577267658	no
LOC105195673	QH	1.77628316116177	-0.156919105199937	1.54693179210804	0	1.84743618160836	3QH	south_america	1.84743618160836	1.5096635077775	1.07734718588099	no
LOC105195673	QH	1.77628316116177	-0.156919105199937	1.54693179210804	1.70513014071517	0	112BQH	south_america	1.70513014071517	-1.43569800212899	-0.826654997623675	no
LOC105195673	QH	1.77628316116177	-0.156919105199937	1.54693179210804	0	1.70513014071517	111BQH	south_america	1.70513014071517	1.43569800212899	1.02953285688093	no
LOC105195673	QH	1.77628316116177	-0.156919105199937	1.54693179210804	2.59526591919288	0	118QH	south_america	2.59526591919288	-1.84609848168342	-1.09195465831212	no
LOC105195673	QH	1.77628316116177	-0.156919105199937	1.54693179210804	0	0	114CQH	south_america	0	0	0.10143892962863	no
LOC105195673	QT	0.652448938540187	0.182227205719409	1.1287051691787	0.830770536410475	0	3QT	south_america	0.830770536410475	-0.872450979159287	-0.93441424180429	no
LOC105195673	QT	0.652448938540187	0.182227205719409	1.1287051691787	0	0.58976129065133	118QT	south_america	0.58976129065133	0.668810155039405	0.431098361739636	no
LOC105195673	QT	0.652448938540187	0.182227205719409	1.1287051691787	0.403076985078189	0	112BQT	south_america	0.403076985078189	-0.488594170000894	-0.594328256871921	no
LOC105195673	QT	0.652448938540187	0.182227205719409	1.1287051691787	0	0.969232292478887	114CQT	south_america	0.969232292478887	0.97763330293098	0.704706701919641	no
LOC105195673	QT	0.652448938540187	0.182227205719409	1.1287051691787	0	0.345622679162408	111BQT	south_america	0.345622679162408	0.42827392613332	0.217990248589848	no
LOC105195673	QT	0.652448938540187	0.182227205719409	1.1287051691787	0.715136586429044	0	43QT	south_america	0.715136586429044	-0.778323471277037	-0.85102000347477	no
LOC105195673	W	1.03355964141415	0.127073279071061	1.3566622902154	0	2.50648548526815	3BW	south_america	2.50648548526815	1.81002575613728	1.24050951309262	no
LOC105195673	W	1.03355964141415	0.127073279071061	1.3566622902154	0	1.26050624165114	114W	south_america	1.26050624165114	1.17664590119448	0.77364324909243	no
LOC105195673	W	1.03355964141415	0.127073279071061	1.3566622902154	0.437318492001414	0	28W	south_america	0.437318492001414	-0.523379780597576	-0.479450976385114	no
LOC105195673	W	1.03355964141415	0.127073279071061	1.3566622902154	0.64881647979822	0	112W	south_america	0.64881647979822	-0.721430829691621	-0.625435021583717	no
LOC105195673	W	1.03355964141415	0.127073279071061	1.3566622902154	0	0.835495161756051	104W	south_america	0.835495161756051	0.876169311593684	0.552161018939864	no
LOC105195673	W	1.03355964141415	0.127073279071061	1.3566622902154	0	1.23162412107224	43CW	south_america	1.23162412107224	1.15809405031617	0.759968622022668	no
LOC105195681	QA	4.88608574727138	0.297259275323424	1.07755291546055	1.38557713620627	2.86054634571618	43QA	south_america	4.24612348192245	0.694466696835998	0.368619875472944	no
LOC105195681	QA	4.88608574727138	0.297259275323424	1.07755291546055	2.51898497232903	3.13660844072176	118QA	south_america	5.6555934130508	0.2332890496004	-0.0593662035573294	no
LOC105195681	QA	4.88608574727138	0.297259275323424	1.07755291546055	8.24378586096562	10.7143030540347	114CQA	south_america	18.9580889150003	0.341715378957619	0.0412565387707146	no
LOC105195681	QA	4.88608574727138	0.297259275323424	1.07755291546055	0.215235283294178	0.528672159533939	112BQA	south_america	0.743907442828117	0.331043375188626	0.0313526132967329	no
LOC105195681	QA	4.88608574727138	0.297259275323424	1.07755291546055	0.21627215993274	0.715136586429044	111BQA	south_america	0.931408746361784	0.49585738077521	0.184304735853186	no
LOC105195681	QA	4.88608574727138	0.297259275323424	1.07755291546055	1.51567123619126	4.01037677642904	3QA	south_america	5.52604801262031	0.993975703008189	0.646572820404823	no
LOC105195681	QH	7.63892311781285	-0.156919105199937	1.54693179210804	10.7143030540346	1.84743618160836	3QH	south_america	12.561739235643	-2.04053571029102	-1.21764683788949	no
LOC105195681	QH	7.63892311781285	-0.156919105199937	1.54693179210804	3.41026028143035	1.45384843871833	112BQH	south_america	4.86410872014868	-0.845817658102615	-0.445332209485398	no
LOC105195681	QH	7.63892311781285	-0.156919105199937	1.54693179210804	1.36410411257214	1.70513014071517	111BQH	south_america	3.06923425328731	0.194404430495068	0.2271099071642	no
LOC105195681	QH	7.63892311781285	-0.156919105199937	1.54693179210804	5.01297097053631	2.90769687743666	43QH	south_america	7.92066784797297	-0.621759432634339	-0.300491805654181	no
LOC105195681	QH	7.63892311781285	-0.156919105199937	1.54693179210804	2.59526591919288	4.76191246845985	118QH	south_america	7.35717838765273	0.680449262417607	0.541309172058869	no
LOC105195681	QH	7.63892311781285	-0.156919105199937	1.54693179210804	17.5453983968771	9.09402741714759	114CQH	south_america	26.6394258140247	-0.877559350141885	-0.465851337866627	no
LOC105195681	QT	8.79433831001638	0.182227205719409	1.1287051691787	0.806153970156377	1.50389129116089	112BQT	south_america	2.31004526131727	0.471251043399616	0.256066726344945	no
LOC105195681	QT	8.79433831001638	0.182227205719409	1.1287051691787	4.67147865454718	4.84616146239444	114CQT	south_america	9.51764011694162	0.0437647545533021	-0.122673710502149	no
LOC105195681	QT	8.79433831001638	0.182227205719409	1.1287051691787	5.81539375487333	2.25564274821782	3QT	south_america	8.07103650309115	-1.06585461330609	-1.10576424482371	no
LOC105195681	QT	8.79433831001638	0.182227205719409	1.1287051691787	10.5108269727312	8.25665806911862	118QT	south_america	18.7674850418498	-0.314428148315397	-0.440022219793852	no
LOC105195681	QT	8.79433831001638	0.182227205719409	1.1287051691787	0.470380728473151	1.38249071664963	111BQT	south_america	1.85287144512278	0.696280829501134	0.455436581508505	no
LOC105195681	QT	8.79433831001638	0.182227205719409	1.1287051691787	8.58163903714853	11.9372799427002	43QT	south_america	20.5189189798487	0.433189953333052	0.222345705917389	no
LOC105195681	W	3.20911356146582	0.127073279071061	1.3566622902154	0.923718090804182	2.52101248330227	114W	south_america	3.44473057410645	0.872092945695577	0.549156316938853	no
LOC105195681	W	3.20911356146582	0.127073279071061	1.3566622902154	11.678696636368	2.50648548526815	3BW	south_america	14.1851821216361	-1.85430878352591	-1.46048289016892	no
LOC105195681	W	3.20911356146582	0.127073279071061	1.3566622902154	4.65231500389866	1.23162412107224	43CW	south_america	5.8839391249709	-1.34074781908866	-1.08193550358555	no
LOC105195681	W	3.20911356146582	0.127073279071061	1.3566622902154	1.31195547600424	1.66154107282095	28W	south_america	2.97349654882519	0.203148215599089	0.0560750726814632	no
LOC105195681	W	3.20911356146582	0.127073279071061	1.3566622902154	0.97436008040867	1.6709903235121	104W	south_america	2.64535040392077	0.435989619333578	0.227703196654395	no
LOC105195681	W	3.20911356146582	0.127073279071061	1.3566622902154	1.94644943939466	0	112W	south_america	1.94644943939466	-1.5589775099837	-1.24279328851034	no
LOC105195701	QA	16.9269687130172	0.297259275323424	1.07755291546055	6.92788568103137	12.1573219692938	43QA	south_america	19.0852076503251	0.730857809635186	0.402391871517921	no
LOC105195701	QA	16.9269687130172	0.297259275323424	1.07755291546055	12.3656787914484	29.761952927874	114CQA	south_america	42.1276317193225	1.20261398757302	0.840195130336265	no
LOC105195701	QA	16.9269687130172	0.297259275323424	1.07755291546055	12.9141169976507	11.3664514299797	112BQA	south_america	24.2805684276304	-0.170117780453102	-0.433739307899111	no
LOC105195701	QA	16.9269687130172	0.297259275323424	1.07755291546055	6.92720867390485	7.84152110180441	118QA	south_america	14.7687297757093	0.157481639240885	-0.129717653840506	no
LOC105195701	QA	16.9269687130172	0.297259275323424	1.07755291546055	5.83934831818398	8.58163903714853	111BQA	south_america	14.4209873553325	0.486413599161986	0.175540635754038	no
LOC105195701	QA	16.9269687130172	0.297259275323424	1.07755291546055	2.2735068542869	9.02334774696535	3QA	south_america	11.2968546012522	1.61445553694277	1.22239589603484	no
LOC105195701	QH	10.1051399932926	-0.156919105199937	1.54693179210804	5.01297097053631	4.54701370857379	114CQH	south_america	9.5599846791101	-0.116366702635454	0.0262147321371041	no
LOC105195701	QH	10.1051399932926	-0.156919105199937	1.54693179210804	10.7143030540346	16.6269256344753	3QH	south_america	27.3412286885099	0.589509748603019	0.482522149723086	no
LOC105195701	QH	10.1051399932926	-0.156919105199937	1.54693179210804	8.52565070357586	1.45384843871833	112BQH	south_america	9.97949914229419	-1.95677150335053	-1.16349822748028	no
LOC105195701	QH	10.1051399932926	-0.156919105199937	1.54693179210804	2.50648548526815	14.5384843871833	43QH	south_america	17.0449698724515	2.14774812990052	1.48983119156136	no
LOC105195701	QH	10.1051399932926	-0.156919105199937	1.54693179210804	5.19053183838576	1.19047811711496	118QH	south_america	6.38100995550072	-1.49881755677406	-0.867458060154994	no
LOC105195701	QH	10.1051399932926	-0.156919105199937	1.54693179210804	6.82052056286069	3.41026028143035	111BQH	south_america	10.230780844291	-0.826400839674583	-0.432780383653715	no
LOC105195701	QT	13.2821814083033	0.182227205719409	1.1287051691787	4.70380728473151	8.29494429989779	111BQT	south_america	12.9987515846293	0.704520981714764	0.462737117059012	no
LOC105195701	QT	13.2821814083033	0.182227205719409	1.1287051691787	6.04615477617283	7.51945645580446	112BQT	south_america	13.5656112319773	0.273925223467775	0.0812417806282307	no
LOC105195701	QT	13.2821814083033	0.182227205719409	1.1287051691787	9.9692464369257	7.89474961876238	3QT	south_america	17.8639960556881	-0.302438518894382	-0.429399756330041	no
LOC105195701	QT	13.2821814083033	0.182227205719409	1.1287051691787	8.58163903714853	5.11597711830009	43QT	south_america	13.6976161554486	-0.647689455627581	-0.735282059486694	no
LOC105195701	QT	13.2821814083033	0.182227205719409	1.1287051691787	4.67147865454719	4.71809032521064	118QT	south_america	9.38956897975783	0.0118084892697153	-0.150986033468509	no
LOC105195701	QT	13.2821814083033	0.182227205719409	1.1287051691787	2.33573932727359	2.90769687743666	114CQT	south_america	5.24343620471025	0.228312007675127	0.0408297961364454	no
LOC105195701	W	17.523676189131	0.127073279071061	1.3566622902154	0	2.50648548526815	3BW	south_america	2.50648548526815	1.81002575613728	1.24050951309262	no
LOC105195701	W	17.523676189131	0.127073279071061	1.3566622902154	8.30905134802687	7.7538583398311	28W	south_america	16.062909687858	-0.0887151177948045	-0.159058299491471	no
LOC105195701	W	17.523676189131	0.127073279071061	1.3566622902154	10.160898998846	8.82354369155795	114W	south_america	18.9844426904039	-0.184137785955737	-0.229394645426009	no
LOC105195701	W	17.523676189131	0.127073279071061	1.3566622902154	5.84616048245202	17.5453983968771	104W	south_america	23.3915588793291	1.4376942440995	0.966062795790067	no
LOC105195701	W	17.523676189131	0.127073279071061	1.3566622902154	6.20308667186488	14.7794894528669	43CW	south_america	20.9825761247318	1.13136335866853	0.740265345945469	no
LOC105195701	W	17.523676189131	0.127073279071061	1.3566622902154	7.13698127778042	6.76135068421303	112W	south_america	13.8983319619935	-0.0681859291497934	-0.143926170594638	no
LOC105195710	QA	0.749644348304743	0.297259275323424	1.07755291546055	0.215235283294178	0.264336079766969	112BQA	south_america	0.479571363061148	0.0571443418352689	-0.222833542597331	no
LOC105195710	QA	0.749644348304743	0.297259275323424	1.07755291546055	0	0.784152110180441	118QA	south_america	0.784152110180441	0.83523861932102	0.499260255602077	no
LOC105195710	QA	0.749644348304743	0.297259275323424	1.07755291546055	0.21627215993274	0.357568293214522	111BQA	south_america	0.573840453147262	0.15855868491541	-0.128718124574638	no
LOC105195710	QA	0.749644348304743	0.297259275323424	1.07755291546055	1.37396431016094	0	114CQA	south_america	1.37396431016094	-1.24729824587246	-1.4333936635824	no
LOC105195710	QA	0.749644348304743	0.297259275323424	1.07755291546055	0	0.715136586429044	43QA	south_america	0.715136586429044	0.778323471277037	0.446441366406592	no
LOC105195710	QA	0.749644348304743	0.297259275323424	1.07755291546055	0	1.00259419410726	3QA	south_america	1.00259419410726	1.00187010289637	0.653899049840907	no
LOC105195710	QH	3.03333772843508	-0.156919105199937	1.54693179210804	2.50648548526815	2.2735068542869	114CQH	south_america	4.77999233955505	-0.0991887563966214	0.0373192593867666	no
LOC105195710	QH	3.03333772843508	-0.156919105199937	1.54693179210804	14.2857374053795	0	3QH	south_america	14.2857374053795	-3.93411424642025	-2.44173347557429	no
LOC105195710	QH	3.03333772843508	-0.156919105199937	1.54693179210804	1.70513014071517	1.45384843871833	112BQH	south_america	3.1589785794335	-0.140651858043397	0.0105158141034599	no
LOC105195710	QH	3.03333772843508	-0.156919105199937	1.54693179210804	2.59526591919288	0	118QH	south_america	2.59526591919288	-1.84609848168342	-1.09195465831212	no
LOC105195710	QH	3.03333772843508	-0.156919105199937	1.54693179210804	1.36410411257214	0	111BQH	south_america	1.36410411257214	-1.24129357163393	-0.700984020088105	no
LOC105195710	QH	3.03333772843508	-0.156919105199937	1.54693179210804	0	2.90769687743666	43QH	south_america	2.90769687743666	1.96631856086315	1.37254769531222	no
LOC105195710	QT	1.01609772812037	0.182227205719409	1.1287051691787	0	1.12782137410891	3QT	south_america	1.12782137410891	1.0893770448693	0.8037084120116	no
LOC105195710	QT	1.01609772812037	0.182227205719409	1.1287051691787	0.403076985078189	0.501297097053631	112BQT	south_america	0.904374082131819	0.0976153352938308	-0.0749636598963625	no
LOC105195710	QT	1.01609772812037	0.182227205719409	1.1287051691787	0	1.93846458495777	114CQT	south_america	1.93846458495777	1.5550625107433	1.21629221032348	no
LOC105195710	QT	1.01609772812037	0.182227205719409	1.1287051691787	0.583934831818398	0	118QT	south_america	0.583934831818398	-0.66351297951696	-0.749301242105386	no
LOC105195710	QT	1.01609772812037	0.182227205719409	1.1287051691787	0.235190364236576	0	111BQT	south_america	0.235190364236576	-0.304733403247833	-0.431432957219092	no
LOC105195710	QT	1.01609772812037	0.182227205719409	1.1287051691787	1.43027317285809	2.55798855915004	43QT	south_america	3.98826173200813	0.549943383674982	0.325785854443408	no
LOC105195710	W	1.39005407800248	0.127073279071061	1.3566622902154	0	1.22933648803873	112W	south_america	1.22933648803873	1.15661438823829	0.758877958496043	no
LOC105195710	W	1.39005407800248	0.127073279071061	1.3566622902154	1.55077166796622	0	43CW	south_america	1.55077166796622	-1.35093376203875	-1.08944359386237	no
LOC105195710	W	1.39005407800248	0.127073279071061	1.3566622902154	0	2.50648548526815	3BW	south_america	2.50648548526815	1.81002575613728	1.24050951309262	no
LOC105195710	W	1.39005407800248	0.127073279071061	1.3566622902154	0	0.55384702427365	28W	south_america	0.55384702427365	0.635844477886412	0.375016835423777	no
LOC105195710	W	1.39005407800248	0.127073279071061	1.3566622902154	0.923718090804182	2.52101248330227	114W	south_america	3.44473057410645	0.872092945695577	0.549156316938853	no
LOC105195710	W	1.39005407800248	0.127073279071061	1.3566622902154	0.487180040204335	0	104W	south_america	0.487180040204335	-0.572579312748018	-0.515716104785366	no
LOC105195789	QA	5.23926656173259	0.297259275323424	1.07755291546055	3.67662671885658	5.72109269143235	111BQA	south_america	9.39771941028893	0.523227520663741	0.20970501039732	no
LOC105195789	QA	5.23926656173259	0.297259275323424	1.07755291546055	6.18283939572422	4.76191246845985	114CQA	south_america	10.9447518641841	-0.318006513926169	-0.570984292670795	no
LOC105195789	QA	5.23926656173259	0.297259275323424	1.07755291546055	1.51567123619126	1.00259419410726	3QA	south_america	2.51826543029853	-0.329073291138084	-0.581254579218334	no
LOC105195789	QA	5.23926656173259	0.297259275323424	1.07755291546055	2.36758811623596	3.17203295720363	112BQA	south_america	5.53962107343959	0.309034858843549	0.0109280791236983	no
LOC105195789	QA	5.23926656173259	0.297259275323424	1.07755291546055	2.07836570430941	2.86054634571618	43QA	south_america	4.93891205002559	0.326640401167927	0.0272665271681302	no
LOC105195789	QA	5.23926656173259	0.297259275323424	1.07755291546055	1.25949248616452	2.35245633054132	118QA	south_america	3.61194881670584	0.569219780147824	0.25238714583976	no
LOC105195789	QH	3.51430214252616	-0.156919105199937	1.54693179210804	0	0	43QH	south_america	0	0	0.10143892962863	no
LOC105195789	QH	3.51430214252616	-0.156919105199937	1.54693179210804	2.59526591919288	0	118QH	south_america	2.59526591919288	-1.84609848168342	-1.09195465831212	no
LOC105195789	QH	3.51430214252616	-0.156919105199937	1.54693179210804	5.01297097053631	0	114CQH	south_america	5.01297097053631	-2.58807799349749	-1.57160057133777	no
LOC105195789	QH	3.51430214252616	-0.156919105199937	1.54693179210804	2.72820822514428	1.70513014071517	111BQH	south_america	4.43333836585945	-0.462784436455975	-0.19772386398448	no
LOC105195789	QH	3.51430214252616	-0.156919105199937	1.54693179210804	14.2857374053795	0	3QH	south_america	14.2857374053795	-3.93411424642025	-2.44173347557429	no
LOC105195789	QH	3.51430214252616	-0.156919105199937	1.54693179210804	0	1.45384843871833	112BQH	south_america	1.45384843871833	1.2950461440856	0.938609741355765	no
LOC105195789	QT	2.64245370445674	0.182227205719409	1.1287051691787	0.830770536410475	2.25564274821782	3QT	south_america	3.0864132846283	0.830491417726206	0.57434326492764	no
LOC105195789	QT	2.64245370445674	0.182227205719409	1.1287051691787	1.20923095523457	0	112BQT	south_america	1.20923095523457	-1.14354424737338	-1.17459500434244	no
LOC105195789	QT	2.64245370445674	0.182227205719409	1.1287051691787	2.33573932727359	2.90769687743666	114CQT	south_america	5.24343620471025	0.228312007675127	0.0408297961364454	no
LOC105195789	QT	2.64245370445674	0.182227205719409	1.1287051691787	1.75180449545519	2.35904516260532	118QT	south_america	4.11084965806051	0.287673216790556	0.0934221034425446	no
LOC105195789	QT	2.64245370445674	0.182227205719409	1.1287051691787	0.470380728473151	1.72811339581204	111BQT	south_america	2.19849412428519	0.891713848969643	0.62858456098548	no
LOC105195789	QT	2.64245370445674	0.182227205719409	1.1287051691787	0	0	43QT	south_america	0	0	-0.161448012018946	no
LOC105195789	W	3.0334510898826	0.127073279071061	1.3566622902154	2.59526591919288	0.614668244019367	112W	south_america	3.20993416321225	-1.15486070801779	-0.944917534993415	no
LOC105195789	W	3.0334510898826	0.127073279071061	1.3566622902154	0	0	3BW	south_america	0	0	-0.093666109825228	no
LOC105195789	W	3.0334510898826	0.127073279071061	1.3566622902154	1.55077166796622	0	43CW	south_america	1.55077166796622	-1.35093376203875	-1.08944359386237	no
LOC105195789	W	3.0334510898826	0.127073279071061	1.3566622902154	1.84743618160836	2.52101248330227	114W	south_america	4.36844866491063	0.306326834324526	0.132128353936193	no
LOC105195789	W	3.0334510898826	0.127073279071061	1.3566622902154	1.46154012061301	2.50648548526815	104W	south_america	3.96802560588116	0.510464501903634	0.28259886457941	no
LOC105195789	W	3.0334510898826	0.127073279071061	1.3566622902154	1.74927396800566	1.1076940485473	28W	south_america	2.85696801655296	-0.383385218543408	-0.376260548624392	no
LOC105196907	QA	3.5375075890793	0.297259275323424	1.07755291546055	0	3.13660844072176	118QA	south_america	3.13660844072176	2.04844840273524	1.62515371847271	no
LOC105196907	QA	3.5375075890793	0.297259275323424	1.07755291546055	3.03134247238253	2.00518838821452	3QA	south_america	5.03653086059705	-0.423804915919109	-0.669168243059646	no
LOC105196907	QA	3.5375075890793	0.297259275323424	1.07755291546055	1.38557713620627	1.43027317285809	43QA	south_america	2.81585030906436	0.0267801521402927	-0.251012381204062	no
LOC105196907	QA	3.5375075890793	0.297259275323424	1.07755291546055	2.74792862032187	1.19047811711496	114CQA	south_america	3.93840673743683	-0.774847674782656	-0.994945988010122	no
LOC105196907	QA	3.5375075890793	0.297259275323424	1.07755291546055	0	0	112BQA	south_america	0	0	-0.27586513020233	no
LOC105196907	QA	3.5375075890793	0.297259275323424	1.07755291546055	2.81153807912562	1.43027317285809	111BQA	south_america	4.24181125198371	-0.649254801516191	-0.878392200753385	no
LOC105196907	QH	0	-0.156919105199937	1.54693179210804	0	2.90769687743666	112BQH	south_america	2.90769687743666	1.96631856086315	1.37254769531222	no
LOC105196907	QH	0	-0.156919105199937	1.54693179210804	0	0	114CQH	south_america	0	0	0.10143892962863	no
LOC105196907	QH	0	-0.156919105199937	1.54693179210804	0	0	118QH	south_america	0	0	0.10143892962863	no
LOC105196907	QH	0	-0.156919105199937	1.54693179210804	0	0	111BQH	south_america	0	0	0.10143892962863	no
LOC105196907	QH	0	-0.156919105199937	1.54693179210804	0	0	43QH	south_america	0	0	0.10143892962863	no
LOC105196907	QH	0	-0.156919105199937	1.54693179210804	0	1.84743618160836	3QH	south_america	1.84743618160836	1.5096635077775	1.07734718588099	no
LOC105196907	QT	3.39775102502223	0.182227205719409	1.1287051691787	2.41846191046913	1.00259419410726	112BQT	south_america	3.42105610457639	-0.771477247575444	-0.84495444810341	no
LOC105196907	QT	3.39775102502223	0.182227205719409	1.1287051691787	0	2.90769687743666	114CQT	south_america	2.90769687743666	1.96631856086315	1.58065312701805	no
LOC105196907	QT	3.39775102502223	0.182227205719409	1.1287051691787	1.64633254965603	1.72811339581204	111BQT	south_america	3.37444594546807	0.0439092438271494	-0.122545697201783	no
LOC105196907	QT	3.39775102502223	0.182227205719409	1.1287051691787	3.50360899091039	4.71809032521064	118QT	south_america	8.22169931612103	0.344451833301403	0.143726308704723	no
LOC105196907	QT	3.39775102502223	0.182227205719409	1.1287051691787	3.3230821456419	11.2782137410891	3QT	south_america	14.601295886731	1.50596853465942	1.17279637330202	no
LOC105196907	QT	3.39775102502223	0.182227205719409	1.1287051691787	2.14540975928713	0.852662853050014	43QT	south_america	2.99807261233715	-0.763647608227461	-0.838017615029738	no
LOC105196907	W	3.43406439249556	0.127073279071061	1.3566622902154	2.18659246000707	2.76923512136825	28W	south_america	4.95582758137532	0.242257270160269	0.0849024786197309	no
LOC105196907	W	3.43406439249556	0.127073279071061	1.3566622902154	0	1.26050624165114	114W	south_america	1.26050624165114	1.17664590119448	0.77364324909243	no
LOC105196907	W	3.43406439249556	0.127073279071061	1.3566622902154	0	0	3BW	south_america	0	0	-0.093666109825228	no
LOC105196907	W	3.43406439249556	0.127073279071061	1.3566622902154	1.29763295959644	0.614668244019367	112W	south_america	1.91230120361581	-0.508910576249195	-0.468785680789639	no
LOC105196907	W	3.43406439249556	0.127073279071061	1.3566622902154	1.46154012061301	5.0129709705363	104W	south_america	6.47451109114931	1.28851673926385	0.856103592301063	no
LOC105196907	W	3.43406439249556	0.127073279071061	1.3566622902154	0	8.6213688475057	43CW	south_america	8.6213688475057	3.26624216312426	2.31389116266717	no
LOC105199287	QA	14.187256800005	0.297259275323424	1.07755291546055	9.29970287710782	10.7270487964357	111BQA	south_america	20.0267516735435	0.187237273996838	-0.102103571665029	no
LOC105199287	QA	14.187256800005	0.297259275323424	1.07755291546055	5.49585724064375	9.52382493691969	114CQA	south_america	15.0196821775634	0.696067322789473	0.370105302249215	no
LOC105199287	QA	14.187256800005	0.297259275323424	1.07755291546055	0	0	112BQA	south_america	0	0	-0.27586513020233	no
LOC105199287	QA	14.187256800005	0.297259275323424	1.07755291546055	6.29746243082259	7.05736899162397	118QA	south_america	13.3548314224466	0.142913947661162	-0.143236889295868	no
LOC105199287	QA	14.187256800005	0.297259275323424	1.07755291546055	2.77115427241255	9.29677562357758	43QA	south_america	12.0679298959901	1.44911456107794	1.06895472995144	no
LOC105199287	QA	14.187256800005	0.297259275323424	1.07755291546055	13.6410411257214	13.0337245233944	3QA	south_america	26.6747656491158	-0.0611201991866374	-0.332586427420959	no
LOC105199287	QH	20.9159601725678	-0.156919105199937	1.54693179210804	9.54872878800497	8.52565070357586	111BQH	south_america	18.0743794915808	-0.147179599773142	0.00629601478001982	no
LOC105199287	QH	20.9159601725678	-0.156919105199937	1.54693179210804	2.59526591919288	7.14286870268977	118QH	south_america	9.73813462188265	1.17943865851336	0.863876332835728	no
LOC105199287	QH	20.9159601725678	-0.156919105199937	1.54693179210804	8.52565070357586	11.6307875097467	112BQH	south_america	20.1564382133225	0.407055039148928	0.364575960767039	no
LOC105199287	QH	20.9159601725678	-0.156919105199937	1.54693179210804	14.2857374053795	7.38974472643346	3QH	south_america	21.675482131813	-0.865487331763654	-0.458047491284755	no
LOC105199287	QH	20.9159601725678	-0.156919105199937	1.54693179210804	20.0518838821452	9.09402741714759	114CQH	south_america	29.1459112992928	-1.06044743198974	-0.584077676468556	no
LOC105199287	QH	20.9159601725678	-0.156919105199937	1.54693179210804	12.5324274263408	11.6307875097466	43QH	south_america	24.1632149360874	-0.0994760592819601	0.0371335350472681	no
LOC105199287	QT	15.6897410628653	0.182227205719409	1.1287051691787	4.08754382272879	8.25665806911862	118QT	south_america	12.3442018918474	0.863522114936097	0.603607503377017	no
LOC105199287	QT	15.6897410628653	0.182227205719409	1.1287051691787	22.8134653309478	32.4885318412664	111BQT	south_america	55.3019971722142	0.491889552161222	0.274351845723484	no
LOC105199287	QT	15.6897410628653	0.182227205719409	1.1287051691787	0.403076985078189	2.00518838821452	112BQT	south_america	2.40826537329271	1.09886126294017	0.812111153781418	no
LOC105199287	QT	15.6897410628653	0.182227205719409	1.1287051691787	9.34295730909437	9.69232292478887	114CQT	south_america	19.0352802338832	0.0479265679064534	-0.118986464738776	no
LOC105199287	QT	15.6897410628653	0.182227205719409	1.1287051691787	17.44618126462	13.5338564893069	3QT	south_america	30.9800377539269	-0.343904613929364	-0.466137512271352	no
LOC105199287	QT	15.6897410628653	0.182227205719409	1.1287051691787	1.43027317285809	3.41065141220006	43QT	south_america	4.84092458505815	0.859873256265262	0.60037472056493	no
LOC105199287	W	24.080867575513	0.127073279071061	1.3566622902154	1.94644943939466	0	112W	south_america	1.94644943939466	-1.5589775099837	-1.24279328851034	no
LOC105199287	W	24.080867575513	0.127073279071061	1.3566622902154	18.4743618160836	52.9412621493477	114W	south_america	71.4156239654313	1.46981322772229	0.9897377986662	no
LOC105199287	W	24.080867575513	0.127073279071061	1.3566622902154	31.0154333593244	35.717099511095	43CW	south_america	66.7325328704194	0.197684558363973	0.0520477939146533	no
LOC105199287	W	24.080867575513	0.127073279071061	1.3566622902154	8.74636984002829	18.8307988253041	28W	south_america	27.5771686653324	1.02480591963556	0.661721525717328	no
LOC105199287	W	24.080867575513	0.127073279071061	1.3566622902154	15.5715955151573	5.01297097053631	3BW	south_america	20.5845664856936	-1.46256261348398	-1.17172556797658	no
LOC105199287	W	24.080867575513	0.127073279071061	1.3566622902154	3.41026028143035	2.50648548526815	104W	south_america	5.9167457666985	-0.330838046050937	-0.337527864100428	no
LOC105199288	QA	2.47804815876619	0.297259275323424	1.07755291546055	0.21627215993274	0	111BQA	south_america	0.21627215993274	-0.282466090501827	-0.538001760755736	no
LOC105199288	QA	2.47804815876619	0.297259275323424	1.07755291546055	0.757835618095632	3.00778258232178	3QA	south_america	3.76561820041742	1.18900408119913	0.827564747012512	no
LOC105199288	QA	2.47804815876619	0.297259275323424	1.07755291546055	0	1.19047811711496	114CQA	south_america	1.19047811711496	1.1312458022037	0.773963408120731	no
LOC105199288	QA	2.47804815876619	0.297259275323424	1.07755291546055	0	0	112BQA	south_america	0	0	-0.27586513020233	no
LOC105199288	QA	2.47804815876619	0.297259275323424	1.07755291546055	15.241348498269	12.1573219692938	43QA	south_america	27.3986704675628	-0.303805548641474	-0.557805389731606	no
LOC105199288	QA	2.47804815876619	0.297259275323424	1.07755291546055	10.0759398893161	24.3087154155937	118QA	south_america	34.3846553049098	1.19220515387848	0.830535434236712	no
LOC105199288	QH	6.20344908765127	-0.156919105199937	1.54693179210804	0	0	43QH	south_america	0	0	0.10143892962863	no
LOC105199288	QH	6.20344908765127	-0.156919105199937	1.54693179210804	0	2.38095623422992	118QH	south_america	2.38095623422992	1.75743134096713	1.23751445017388	no
LOC105199288	QH	6.20344908765127	-0.156919105199937	1.54693179210804	6.82052056286069	4.36154531615499	112BQH	south_america	11.1820658790157	-0.5446157645681	-0.25062298243922	no
LOC105199288	QH	6.20344908765127	-0.156919105199937	1.54693179210804	6.82052056286069	3.41026028143035	111BQH	south_america	10.230780844291	-0.826400839674583	-0.432780383653715	no
LOC105199288	QH	6.20344908765127	-0.156919105199937	1.54693179210804	0	0	3QH	south_america	0	0	0.10143892962863	no
LOC105199288	QH	6.20344908765127	-0.156919105199937	1.54693179210804	10.0259419410726	0	114CQH	south_america	10.0259419410726	-3.46283000469883	-2.13707606008527	no
LOC105199288	QT	11.6002223297617	0.182227205719409	1.1287051691787	2.33573932727359	3.87692916991555	114CQT	south_america	6.21266849718914	0.547966466355402	0.324034363111957	no
LOC105199288	QT	11.6002223297617	0.182227205719409	1.1287051691787	9.40761456946302	9.67743501654743	111BQT	south_america	19.0850495860104	0.0369256775949316	-0.128732934066569	no
LOC105199288	QT	11.6002223297617	0.182227205719409	1.1287051691787	0.830770536410475	1.12782137410891	3QT	south_america	1.95859191051939	0.216926065710017	0.0307421822262555	no
LOC105199288	QT	11.6002223297617	0.182227205719409	1.1287051691787	6.4362292778614	8.52662853050014	43QT	south_america	14.9628578083615	0.357394482440316	0.155193119960962	no
LOC105199288	QT	11.6002223297617	0.182227205719409	1.1287051691787	3.22461588062551	5.01297097053631	112BQT	south_america	8.23758685116182	0.509257821880066	0.289739628284524	no
LOC105199288	QT	11.6002223297617	0.182227205719409	1.1287051691787	11.0947618045496	8.84641935976995	118QT	south_america	19.9411811643195	-0.296711266528528	-0.424325577064944	no
LOC105199288	W	4.37780568934193	0.127073279071061	1.3566622902154	8.52924417381421	12.3162412107224	43CW	south_america	20.8454853845366	0.482753214560045	0.262172788360258	no
LOC105199288	W	4.37780568934193	0.127073279071061	1.3566622902154	3.49854793601131	4.98462321846285	28W	south_america	8.48317115447416	0.411801024238163	0.209873707864244	no
LOC105199288	W	4.37780568934193	0.127073279071061	1.3566622902154	0	0	3BW	south_america	0	0	-0.093666109825228	no
LOC105199288	W	4.37780568934193	0.127073279071061	1.3566622902154	2.59526591919288	1.8440047320581	112W	south_america	4.43927065125098	-0.338174616265099	-0.34293567285805	no
LOC105199288	W	4.37780568934193	0.127073279071061	1.3566622902154	0	0	114W	south_america	0	0	-0.093666109825228	no
LOC105199288	W	4.37780568934193	0.127073279071061	1.3566622902154	0.97436008040867	3.3419806470242	104W	south_america	4.31634072743287	1.13696816558012	0.744396666578475	no
LOC105199292	QA	13.0232671813942	0.297259275323424	1.07755291546055	0	0	112BQA	south_america	0	0	-0.27586513020233	no
LOC105199292	QA	13.0232671813942	0.297259275323424	1.07755291546055	4.75798751852028	7.50893415750496	111BQA	south_america	12.2669216760252	0.563413767373137	0.246998999521019	no
LOC105199292	QA	13.0232671813942	0.297259275323424	1.07755291546055	4.80887508556328	20.2381279909543	114CQA	south_america	25.0470030765176	1.87032589564622	1.45985092495477	no
LOC105199292	QA	13.0232671813942	0.297259275323424	1.07755291546055	6.29746243082259	6.27321688144353	118QA	south_america	12.5706793122661	-0.00480128144850214	-0.280320857043782	no
LOC105199292	QA	13.0232671813942	0.297259275323424	1.07755291546055	3.46394284051568	10.0119122100066	43QA	south_america	13.4758550505223	1.30267455442085	0.933054205201343	no
LOC105199292	QA	13.0232671813942	0.297259275323424	1.07755291546055	9.85186303524322	10.0259419410726	3QA	south_america	19.8778049763158	0.022959165669387	-0.254558366200328	no
LOC105199292	QH	2.78785986927773	-0.156919105199937	1.54693179210804	2.50648548526815	0	43QH	south_america	2.50648548526815	-1.81002575613728	-1.06863577267658	no
LOC105199292	QH	2.78785986927773	-0.156919105199937	1.54693179210804	2.50648548526815	2.2735068542869	114CQH	south_america	4.77999233955505	-0.0991887563966214	0.0373192593867666	no
LOC105199292	QH	2.78785986927773	-0.156919105199937	1.54693179210804	1.29763295959644	0	118QH	south_america	1.29763295959644	-1.20014834991483	-0.674386065395461	no
LOC105199292	QH	2.78785986927773	-0.156919105199937	1.54693179210804	1.36410411257214	1.70513014071517	111BQH	south_america	3.06923425328731	0.194404430495068	0.2271099071642	no
LOC105199292	QH	2.78785986927773	-0.156919105199937	1.54693179210804	1.70513014071517	0	112BQH	south_america	1.70513014071517	-1.43569800212899	-0.826654997623675	no
LOC105199292	QH	2.78785986927773	-0.156919105199937	1.54693179210804	14.2857374053795	1.84743618160836	3QH	south_america	16.1331735869879	-2.42445073864276	-1.46582521932192	no
LOC105199292	QT	10.0770776258682	0.182227205719409	1.1287051691787	5.17418801320466	4.4930948291113	111BQT	south_america	9.66728284231597	-0.168630218038281	-0.310849487836572	no
LOC105199292	QT	10.0770776258682	0.182227205719409	1.1287051691787	6.42328315000238	4.71809032521064	118QT	south_america	11.141373475213	-0.376523989800939	-0.495037331960589	no
LOC105199292	QT	10.0770776258682	0.182227205719409	1.1287051691787	4.43384683586007	2.00518838821452	112BQT	south_america	6.4390352240746	-0.854518467867383	-0.918526557596241	no
LOC105199292	QT	10.0770776258682	0.182227205719409	1.1287051691787	4.15385268205238	16.9173206116337	3QT	south_america	21.071173293686	1.79763170547051	1.43120147214932	no
LOC105199292	QT	10.0770776258682	0.182227205719409	1.1287051691787	4.67147865454718	5.81539375487332	114CQT	south_america	10.4868724094205	0.265072089932261	0.073398161428758	no
LOC105199292	QT	10.0770776258682	0.182227205719409	1.1287051691787	0.715136586429044	7.67396567745013	43QT	south_america	8.38910226387917	2.33836826324627	1.9102783582499	no
LOC105199292	W	9.62248966601614	0.127073279071061	1.3566622902154	0	2.50648548526815	3BW	south_america	2.50648548526815	1.81002575613728	1.24050951309262	no
LOC105199292	W	9.62248966601614	0.127073279071061	1.3566622902154	2.77115427241255	0	114W	south_america	2.77115427241255	-1.91500617023349	-1.50522312297803	no
LOC105199292	W	9.62248966601614	0.127073279071061	1.3566622902154	5.42770083788177	17.2427376950114	43CW	south_america	22.6704385328932	1.50494756271409	1.01563542642898	no
LOC105199292	W	9.62248966601614	0.127073279071061	1.3566622902154	3.93586642801273	3.3230821456419	28W	south_america	7.25894857365463	-0.19124310344949	-0.234631997083085	no
LOC105199292	W	9.62248966601614	0.127073279071061	1.3566622902154	4.38462036183902	12.5324274263408	104W	south_america	16.9170477881798	1.32950411352081	0.886315513537894	no
LOC105199292	W	9.62248966601614	0.127073279071061	1.3566622902154	5.83934831818398	6.14668244019367	112W	south_america	11.9860307583776	0.0634148185339254	-0.0469228495523586	no
LOC105199293	QA	22.1260739185145	0.297259275323424	1.07755291546055	15.241348498269	7.15136586429044	43QA	south_america	22.3927143625595	-0.994557696123882	-1.19884318710713	no
LOC105199293	QA	22.1260739185145	0.297259275323424	1.07755291546055	0	0	112BQA	south_america	0	0	-0.27586513020233	no
LOC105199293	QA	22.1260739185145	0.297259275323424	1.07755291546055	7.35325343771316	17.1632780742971	111BQA	south_america	24.5165315120102	1.12061448583005	0.764097241716172	no
LOC105199293	QA	22.1260739185145	0.297259275323424	1.07755291546055	6.82052056286069	15.0389129116089	3QA	south_america	21.8594334744696	1.03623981488104	0.685795127974555	no
LOC105199293	QA	22.1260739185145	0.297259275323424	1.07755291546055	16.4875717219312	27.3809966936441	114CQA	south_america	43.8685684155754	0.698595281010862	0.372451319957597	no
LOC105199293	QA	22.1260739185145	0.297259275323424	1.07755291546055	13.2246711047274	3.92076055090221	118QA	south_america	17.1454316556296	-1.53144207537627	-1.69708728403199	no
LOC105199293	QH	18.9232450746963	-0.156919105199937	1.54693179210804	12.2769370131492	6.82052056286069	111BQH	south_america	19.0974575760099	-0.763585808623045	-0.392174177632222	no
LOC105199293	QH	18.9232450746963	-0.156919105199937	1.54693179210804	5.19053183838576	2.38095623422992	118QH	south_america	7.57148807261568	-0.872632018010632	-0.46266610878517	no
LOC105199293	QH	18.9232450746963	-0.156919105199937	1.54693179210804	10.0259419410726	8.72309063230999	43QH	south_america	18.7490325733826	-0.18141503539692	-0.0158351714807036	no
LOC105199293	QH	18.9232450746963	-0.156919105199937	1.54693179210804	25.0000404594142	1.84743618160836	3QH	south_america	26.8474766410225	-3.19077845538478	-1.9612108081705	no
LOC105199293	QH	18.9232450746963	-0.156919105199937	1.54693179210804	10.0259419410726	6.82052056286069	114CQH	south_america	16.8464625039333	-0.495565362836032	-0.218914795961763	no
LOC105199293	QH	18.9232450746963	-0.156919105199937	1.54693179210804	18.7564315478669	10.1769390710283	112BQH	south_america	28.9333706188952	-0.821797243351935	-0.429804430643936	no
LOC105199293	QT	17.1504988617617	0.182227205719409	1.1287051691787	5.64307779109464	8.02075355285809	112BQT	south_america	13.6638313439527	0.441396146101744	0.229616154385931	no
LOC105199293	QT	17.1504988617617	0.182227205719409	1.1287051691787	10.7270487964357	4.26331426525007	43QT	south_america	14.9903630616857	-1.15579654970018	-1.18545018837222	no
LOC105199293	QT	17.1504988617617	0.182227205719409	1.1287051691787	10.3483760264093	18.3180019956076	111BQT	south_america	28.6663780220169	0.767460028206001	0.518499284372407	no
LOC105199293	QT	17.1504988617617	0.182227205719409	1.1287051691787	5.81539375487333	13.5338564893069	3QT	south_america	19.3492502441803	1.0925486506932	0.80651836266169	no
LOC105199293	QT	17.1504988617617	0.182227205719409	1.1287051691787	15.1823056272784	4.12832903455931	118QT	south_america	19.3106346618377	-1.65785644151392	-1.63026067167944	no
LOC105199293	QT	17.1504988617617	0.182227205719409	1.1287051691787	4.67147865454718	1.93846458495777	114CQT	south_america	6.60994323950496	-0.948662409516018	-1.00193535576551	no
LOC105199293	W	21.5294195367893	0.127073279071061	1.3566622902154	15.1025812463344	9.19044677931656	104W	south_america	24.2930280256509	-0.660074666215684	-0.580209202366618	no
LOC105199293	W	21.5294195367893	0.127073279071061	1.3566622902154	8.30905134802687	14.9538696553885	28W	south_america	23.2629210034154	0.777200335604047	0.479210678458355	no
LOC105199293	W	21.5294195367893	0.127073279071061	1.3566622902154	19.4644943939466	0	3BW	south_america	19.4644943939466	-4.35505111816205	-3.30378785461891	no
LOC105199293	W	21.5294195367893	0.127073279071061	1.3566622902154	6.46602663562927	12.6050624165114	114W	south_america	19.0710890521406	0.865731014625595	0.54446691773032	no
LOC105199293	W	21.5294195367893	0.127073279071061	1.3566622902154	12.4061733437298	7.38974472643346	43CW	south_america	19.7959180701632	-0.676198673560922	-0.59209425840564	no
LOC105199293	W	21.5294195367893	0.127073279071061	1.3566622902154	20.1133108737448	7.99068717225177	112W	south_america	28.1039980459966	-1.23164953945811	-1.00151882183844	no
LOC105199297	QA	129.692368047067	0.297259275323424	1.07755291546055	25.7664110152515	39.1011735701832	3QA	south_america	64.8675845854347	0.583220750489775	0.265380447738041	no
LOC105199297	QA	129.692368047067	0.297259275323424	1.07755291546055	88.6769367172015	105.840214791499	43QA	south_america	194.5171515087	0.252645878537799	-0.0414025113249843	no
LOC105199297	QA	129.692368047067	0.297259275323424	1.07755291546055	144.953234721979	282.143313756246	114CQA	south_america	427.096548478225	0.956026276676399	0.61135466472328	no
LOC105199297	QA	129.692368047067	0.297259275323424	1.07755291546055	0	0	112BQA	south_america	0	0	-0.27586513020233	no
LOC105199297	QA	129.692368047067	0.297259275323424	1.07755291546055	98.2404139208323	119.975272857607	118QA	south_america	218.21568677844	0.285712535514166	-0.0107157055988502	no
LOC105199297	QA	129.692368047067	0.297259275323424	1.07755291546055	14.0576903956281	24.3146439385875	111BQA	south_america	38.3723343342156	0.749471691195416	0.419666087283255	no
LOC105199297	QH	157.322816632403	-0.156919105199937	1.54693179210804	55.1426806758994	162.831025136453	43QH	south_america	217.973705812352	1.54503873424702	1.10021517957664	no
LOC105199297	QH	157.322816632403	-0.156919105199937	1.54693179210804	20.4615616885821	35.8077329550186	111BQH	south_america	56.2692946436007	0.778253834471684	0.604534048910612	no
LOC105199297	QH	157.322816632403	-0.156919105199937	1.54693179210804	28.5714748107591	18.4743618160836	3QH	south_america	47.0458366268427	-0.602630145148588	-0.288125851587335	no
LOC105199297	QH	157.322816632403	-0.156919105199937	1.54693179210804	121.977498202065	108.333508657461	118QH	south_america	230.311006859527	-0.169658735112903	-0.00823541799189859	no
LOC105199297	QH	157.322816632403	-0.156919105199937	1.54693179210804	44.3333836585945	52.3385437938599	112BQH	south_america	96.6719274524544	0.234604590923803	0.253096935573482	no
LOC105199297	QH	157.322816632403	-0.156919105199937	1.54693179210804	165.428042027698	145.504438674361	114CQH	south_america	310.932480702059	-0.183954163631336	-0.0174765678547198	no
LOC105199297	QT	129.105862145018	0.182227205719409	1.1287051691787	99.8528562409461	109.695600061147	118QT	south_america	209.548456302093	0.13434593597177	-0.0424214144270111	no
LOC105199297	QT	129.105862145018	0.182227205719409	1.1287051691787	25.7969270450041	41.1063619583977	112BQT	south_america	66.9032890034018	0.651970662082389	0.416179060032824	no
LOC105199297	QT	129.105862145018	0.182227205719409	1.1287051691787	19.2856098673992	34.5622679162408	111BQT	south_america	53.84787778364	0.809890655805147	0.556091588153581	no
LOC105199297	QT	129.105862145018	0.182227205719409	1.1287051691787	30.7385098471876	50.751961834901	3QT	south_america	81.4904716820886	0.705379160054893	0.463497438145122	no
LOC105199297	QT	129.105862145018	0.182227205719409	1.1287051691787	78.6650245071949	98.0562281007516	43QT	south_america	176.721252607946	0.314301212583904	0.117013734384328	no
LOC105199297	QT	129.105862145018	0.182227205719409	1.1287051691787	91.0938337636701	112.430945927551	114CQT	south_america	203.524779691221	0.300637818636278	0.104908364159464	no
LOC105199297	W	117.497284521582	0.127073279071061	1.3566622902154	54.5005843030505	35.0907967937541	3BW	south_america	89.5913810968046	-0.62087196539745	-0.551312769480576	no
LOC105199297	W	117.497284521582	0.127073279071061	1.3566622902154	21.4286061080693	25.4769631165879	28W	south_america	46.9055692246572	0.239397693166571	0.0827946755103489	no
LOC105199297	W	117.497284521582	0.127073279071061	1.3566622902154	61.3846850657462	130.337245233944	104W	south_america	191.72193029969	1.07401229276684	0.697991696625871	no
LOC105199297	W	117.497284521582	0.127073279071061	1.3566622902154	88.3939850740745	165.037632223681	43CW	south_america	253.431617297755	0.893260596459542	0.564759058252319	no
LOC105199297	W	117.497284521582	0.127073279071061	1.3566622902154	64.881647979822	80.521539966537	112W	south_america	145.403187946359	0.307304661260765	0.132849113216738	no
LOC105199297	W	117.497284521582	0.127073279071061	1.3566622902154	20.321797997692	27.731137316325	114W	south_america	48.052935314017	0.430286001800606	0.22349904240458	no
LOC105199299	QA	5.64364701558976	0.297259275323424	1.07755291546055	0	0	112BQA	south_america	0	0	-0.27586513020233	no
LOC105199299	QA	5.64364701558976	0.297259275323424	1.07755291546055	4.12189293048281	3.57143435134488	114CQA	south_america	7.6933272818277	-0.164030192717772	-0.428089851943875	no
LOC105199299	QA	5.64364701558976	0.297259275323424	1.07755291546055	2.77115427241255	2.86054634571618	43QA	south_america	5.63170061812872	0.0337988623580099	-0.244498816889017	no
LOC105199299	QA	5.64364701558976	0.297259275323424	1.07755291546055	1.51567123619126	2.00518838821452	3QA	south_america	3.52085962440579	0.256512038906607	-0.0378146036562868	no
LOC105199299	QA	5.64364701558976	0.297259275323424	1.07755291546055	3.2440823989911	6.79379757107592	111BQA	south_america	10.037879970067	0.876873794267094	0.537898891671545	no
LOC105199299	QA	5.64364701558976	0.297259275323424	1.07755291546055	2.51898497232903	3.13660844072176	118QA	south_america	5.6555934130508	0.2332890496004	-0.0593662035573294	no
LOC105199299	QH	5.25112376442877	-0.156919105199937	1.54693179210804	3.57143435134488	1.84743618160836	3QH	south_america	5.41887053295325	-0.682983394244875	-0.340069479293627	no
LOC105199299	QH	5.25112376442877	-0.156919105199937	1.54693179210804	1.36410411257214	3.41026028143035	111BQH	south_america	4.77436439400248	0.899570230554287	0.682957930753057	no
LOC105199299	QH	5.25112376442877	-0.156919105199937	1.54693179210804	7.51945645580446	2.90769687743666	43QH	south_america	10.4271533332411	-1.12444282809383	-0.625446918752267	no
LOC105199299	QH	5.25112376442877	-0.156919105199937	1.54693179210804	3.89289887878932	1.19047811711496	118QH	south_america	5.08337699590428	-1.15944366479438	-0.648072891583849	no
LOC105199299	QH	5.25112376442877	-0.156919105199937	1.54693179210804	2.50648548526815	4.54701370857379	114CQH	south_america	7.05349919384195	0.661685534724761	0.529179530798295	no
LOC105199299	QH	5.25112376442877	-0.156919105199937	1.54693179210804	3.41026028143035	0	112BQH	south_america	3.41026028143035	-2.14086380218821	-1.28250302121253	no
LOC105199299	QT	4.50428087946063	0.182227205719409	1.1287051691787	3.50360899091039	1.17952258130266	118QT	south_america	4.68313157221305	-1.04706942517871	-1.0891211137029	no
LOC105199299	QT	4.50428087946063	0.182227205719409	1.1287051691787	2.14540975928713	0	43QT	south_america	2.14540975928713	-1.65324797233005	-1.62617770182185	no
LOC105199299	QT	4.50428087946063	0.182227205719409	1.1287051691787	4.15385268205238	2.25564274821782	3QT	south_america	6.4094954302702	-0.662708902844054	-0.748588853525213	no
LOC105199299	QT	4.50428087946063	0.182227205719409	1.1287051691787	1.1678696636368	0.969232292478887	114CQT	south_america	2.13710195611568	-0.138644718854322	-0.284283206399429	no
LOC105199299	QT	4.50428087946063	0.182227205719409	1.1287051691787	1.64633254965603	3.45622679162408	111BQT	south_america	5.10255934128011	0.751828289566782	0.504650017915523	no
LOC105199299	QT	4.50428087946063	0.182227205719409	1.1287051691787	2.82153889554732	1.50389129116089	112BQT	south_america	4.32543018670821	-0.609981786507393	-0.701874159753563	no
LOC105199299	W	4.48881651781828	0.127073279071061	1.3566622902154	1.74927396800566	2.2153880970946	28W	south_america	3.96466206510026	0.225942201169411	0.0728765904465824	no
LOC105199299	W	4.48881651781828	0.127073279071061	1.3566622902154	0	5.01297097053631	3BW	south_america	5.01297097053631	2.58807799349749	1.81401424081427	no
LOC105199299	W	4.48881651781828	0.127073279071061	1.3566622902154	1.55077166796622	3.69487236321673	43CW	south_america	5.24564403118295	0.880152174656638	0.555096799709831	no
LOC105199299	W	4.48881651781828	0.127073279071061	1.3566622902154	0.923718090804182	0	114W	south_america	0.923718090804182	-0.943897396406448	-0.789415820872763	no
LOC105199299	W	4.48881651781828	0.127073279071061	1.3566622902154	3.89744032163468	3.3419806470242	104W	south_america	7.23942096865888	-0.173674616840562	-0.221682210879373	no
LOC105199299	W	4.48881651781828	0.127073279071061	1.3566622902154	1.29763295959644	1.22933648803873	112W	south_america	2.52696944763517	-0.0435339616765393	-0.125755128581419	no
LOC105199302	QA	17.9120102718824	0.297259275323424	1.07755291546055	15.1136074117703	21.4286061080693	114CQA	south_america	36.5422135198396	0.477060451090383	0.166860646180064	no
LOC105199302	QA	17.9120102718824	0.297259275323424	1.07755291546055	9.09402741714758	14.0363187175017	3QA	south_america	23.1303461346492	0.574949490552718	0.257704481371673	no
LOC105199302	QA	17.9120102718824	0.297259275323424	1.07755291546055	0	0	112BQA	south_america	0	0	-0.27586513020233	no
LOC105199302	QA	17.9120102718824	0.297259275323424	1.07755291546055	2.59526591919288	8.58163903714853	111BQA	south_america	11.1769049563414	1.41417398309926	1.03652887180809	no
LOC105199302	QA	17.9120102718824	0.297259275323424	1.07755291546055	5.54230854482509	7.15136586429044	43QA	south_america	12.6936744091155	0.317242020742514	0.018544560672966	no
LOC105199302	QA	17.9120102718824	0.297259275323424	1.07755291546055	10.0759398893161	17.2513464239697	118QA	south_america	27.3272863132858	0.720573768152328	0.392847986168715	no
LOC105199302	QH	117.727568970604	-0.156919105199937	1.54693179210804	48.0124195050683	75.0001213782426	118QH	south_america	123.012540883311	0.632854355305139	0.510541876852136	no
LOC105199302	QH	117.727568970604	-0.156919105199937	1.54693179210804	18.7564315478669	17.44618126462	112BQH	south_america	36.2026128124869	-0.0990002076280516	0.0374411450248612	no
LOC105199302	QH	117.727568970604	-0.156919105199937	1.54693179210804	75.1945645580446	77.2992330457545	114CQH	south_america	152.493797603799	0.0393100913492103	0.126850580969534	no
LOC105199302	QH	117.727568970604	-0.156919105199937	1.54693179210804	55.1426806758994	75.6001188133532	43QH	south_america	130.742799489253	0.44824867923558	0.391205215073408	no
LOC105199302	QH	117.727568970604	-0.156919105199937	1.54693179210804	60.714383972863	51.7282130850342	3QH	south_america	112.442597057897	-0.227031676387798	-0.0453236345296887	no
LOC105199302	QH	117.727568970604	-0.156919105199937	1.54693179210804	8.18462467543283	8.52565070357586	111BQH	south_america	16.7102753790087	0.0525968798235375	0.135439704641381	no
LOC105199302	QT	61.7304881488718	0.182227205719409	1.1287051691787	7.99647238404357	15.8986432414708	111BQT	south_america	23.8951156255143	0.909476099224527	0.644321398859456	no
LOC105199302	QT	61.7304881488718	0.182227205719409	1.1287051691787	36.5539036020609	47.3684977125743	3QT	south_america	83.9224013146352	0.36510485067368	0.162024282290956	no
LOC105199302	QT	61.7304881488718	0.182227205719409	1.1287051691787	28.6128067591015	41.8730516362444	118QT	south_america	70.4858583953459	0.533849871146279	0.311527469731292	no
LOC105199302	QT	61.7304881488718	0.182227205719409	1.1287051691787	10.4800016120329	16.0415071057162	112BQT	south_america	26.5215087177491	0.569930084732854	0.343493491126259	no
LOC105199302	QT	61.7304881488718	0.182227205719409	1.1287051691787	17.1632780742971	35.8118398281006	43QT	south_america	52.9751179023977	1.01914525532054	0.741485086145318	no
LOC105199302	QT	61.7304881488718	0.182227205719409	1.1287051691787	49.0505258727454	28.1077364818877	114CQT	south_america	77.1582623546332	-0.781982572429521	-0.854261860828136	no
LOC105199302	W	48.6413886892291	0.127073279071061	1.3566622902154	14.8688287280481	18.2769518010304	28W	south_america	33.1457805290785	0.280681293777543	0.113224946115436	no
LOC105199302	W	48.6413886892291	0.127073279071061	1.3566622902154	22.0597603131395	22.1280567846972	112W	south_america	44.1878170978367	0.00426653861685098	-0.0905212309208593	no
LOC105199302	W	48.6413886892291	0.127073279071061	1.3566622902154	20.321797997692	32.7731622829295	114W	south_america	53.0949602806215	0.663548168558017	0.395437312112347	no
LOC105199302	W	48.6413886892291	0.127073279071061	1.3566622902154	28.2564423318514	49.294214543607	104W	south_america	77.5506568754584	0.781638108880729	0.482481774963867	no
LOC105199302	W	48.6413886892291	0.127073279071061	1.3566622902154	23.3573932727359	20.0518838821452	3BW	south_america	43.4092771548811	-0.210410401982643	-0.248760272536301	no
LOC105199302	W	48.6413886892291	0.127073279071061	1.3566622902154	21.7108033515271	54.1914613271787	43CW	south_america	75.9022646787058	1.28106634532546	0.850611883721765	no
LOC105199303	QA	7.59653209001267	0.297259275323424	1.07755291546055	2.07836570430941	5.00595610500331	43QA	south_america	7.08432180931272	0.964229299461259	0.618967305055986	no
LOC105199303	QA	7.59653209001267	0.297259275323424	1.07755291546055	2.51898497232903	1.56830422036088	118QA	south_america	4.08728919268992	-0.454343250670397	-0.697508693271537	no
LOC105199303	QA	7.59653209001267	0.297259275323424	1.07755291546055	0	0	112BQA	south_america	0	0	-0.27586513020233	no
LOC105199303	QA	7.59653209001267	0.297259275323424	1.07755291546055	3.46035455892384	4.64838781178879	111BQA	south_america	8.10874237071263	0.340680749526404	0.0402963729947509	no
LOC105199303	QA	7.59653209001267	0.297259275323424	1.07755291546055	4.12189293048281	8.33334681980473	114CQA	south_america	12.4552397502875	0.865717411258946	0.52754544837602	no
LOC105199303	QA	7.59653209001267	0.297259275323424	1.07755291546055	3.78917809047816	5.0129709705363	3QA	south_america	8.80214906101446	0.328299908837651	0.0288065978652747	no
LOC105199303	QH	8.6238369480509	-0.156919105199937	1.54693179210804	7.14286870268977	3.69487236321673	3QH	south_america	10.8377410659065	-0.794451203501393	-0.412126831676707	no
LOC105199303	QH	8.6238369480509	-0.156919105199937	1.54693179210804	2.59526591919288	3.57143435134488	118QH	south_america	6.16670027053777	0.346548420338951	0.325462006862502	no
LOC105199303	QH	8.6238369480509	-0.156919105199937	1.54693179210804	2.72820822514428	1.70513014071517	111BQH	south_america	4.43333836585945	-0.462784436455975	-0.19772386398448	no
LOC105199303	QH	8.6238369480509	-0.156919105199937	1.54693179210804	2.50648548526815	6.82052056286069	114CQH	south_america	9.32700604812884	1.15723888572552	0.849525491446927	no
LOC105199303	QH	8.6238369480509	-0.156919105199937	1.54693179210804	5.01297097053631	2.90769687743666	43QH	south_america	7.92066784797297	-0.621759432634339	-0.300491805654181	no
LOC105199303	QH	8.6238369480509	-0.156919105199937	1.54693179210804	5.11539042214552	5.81539375487333	112BQH	south_america	10.9307841770188	0.156352403162088	0.202511519874527	no
LOC105199303	QT	6.17067340559188	0.182227205719409	1.1287051691787	1.8815229138926	3.45622679162408	111BQT	south_america	5.33774970551668	0.62899116581566	0.395819893711781	no
LOC105199303	QT	6.17067340559188	0.182227205719409	1.1287051691787	2.14540975928713	5.11597711830009	43QT	south_america	7.26138687758722	0.959335036825057	0.688494969568634	no
LOC105199303	QT	6.17067340559188	0.182227205719409	1.1287051691787	5.25541348636558	2.94880645325665	118QT	south_america	8.20421993962223	-0.663688593203363	-0.749456830731361	no
LOC105199303	QT	6.17067340559188	0.182227205719409	1.1287051691787	2.41846191046913	2.00518838821452	112BQT	south_america	4.42365029868365	-0.185891917530752	-0.326142852272062	no
LOC105199303	QT	6.17067340559188	0.182227205719409	1.1287051691787	2.49231160923143	4.51128549643564	3QT	south_america	7.00359710566707	0.658206571442251	0.421703894622179	no
LOC105199303	QT	6.17067340559188	0.182227205719409	1.1287051691787	2.33573932727359	1.93846458495777	114CQT	south_america	4.27420391223137	-0.182944042444723	-0.323531120558124	no
LOC105199303	W	7.66902303656339	0.127073279071061	1.3566622902154	3.0612294440099	2.2153880970946	28W	south_america	5.2766175411045	-0.336923655102003	-0.342013585488099	no
LOC105199303	W	7.66902303656339	0.127073279071061	1.3566622902154	1.46154012061301	5.84846613229236	104W	south_america	7.31000625290536	1.47621964608311	0.994459989595385	no
LOC105199303	W	7.66902303656339	0.127073279071061	1.3566622902154	7.78579775757864	2.50648548526815	3BW	south_america	10.2922832428468	-1.32514753392662	-1.07043648479911	no
LOC105199303	W	7.66902303656339	0.127073279071061	1.3566622902154	3.10154333593244	4.92649648428897	43CW	south_america	8.02803982022141	0.531012619487583	0.297744946056096	no
LOC105199303	W	7.66902303656339	0.127073279071061	1.3566622902154	4.54171535858754	3.6880094641162	112W	south_america	8.22972482270374	-0.241357128717319	-0.271571201208728	no
LOC105199303	W	7.66902303656339	0.127073279071061	1.3566622902154	1.84743618160836	2.52101248330227	114W	south_america	4.36844866491063	0.306326834324526	0.132128353936193	no
LOC105199304	QA	8.8979052837584	0.297259275323424	1.07755291546055	3.03134247238253	6.01556516464357	3QA	south_america	9.0469076370261	0.799298981269463	0.465907241067105	no
LOC105199304	QA	8.8979052837584	0.297259275323424	1.07755291546055	4.15673140861882	5.72109269143235	43QA	south_america	9.87782410005117	0.382238896443116	0.0788635248445053	no
LOC105199304	QA	8.8979052837584	0.297259275323424	1.07755291546055	0	0	112BQA	south_america	0	0	-0.27586513020233	no
LOC105199304	QA	8.8979052837584	0.297259275323424	1.07755291546055	4.12189293048281	9.52382493691969	114CQA	south_america	13.6457178674025	1.03891015483374	0.688273280011804	no
LOC105199304	QA	8.8979052837584	0.297259275323424	1.07755291546055	1.25949248616452	5.48906477126309	118QA	south_america	6.7485572574276	1.52201180709817	1.13660546429062	no
LOC105199304	QA	8.8979052837584	0.297259275323424	1.07755291546055	3.02781023905836	5.72109269143235	111BQA	south_america	8.74890293049071	0.73870008460587	0.409669727536094	no
LOC105199304	QH	9.69700912618455	-0.156919105199937	1.54693179210804	28.5714748107591	14.7794894528669	3QH	south_america	43.350964263626	-0.906155668872763	-0.484337168254733	no
LOC105199304	QH	9.69700912618455	-0.156919105199937	1.54693179210804	3.41026028143035	5.81539375487333	112BQH	south_america	9.22565403630367	0.627933208003369	0.507360645897497	no
LOC105199304	QH	9.69700912618455	-0.156919105199937	1.54693179210804	2.72820822514428	6.82052056286069	111BQH	south_america	9.54872878800497	1.06878220327783	0.792343472886722	no
LOC105199304	QH	9.69700912618455	-0.156919105199937	1.54693179210804	3.89289887878932	5.95239058557481	118QH	south_america	9.84528946436413	0.506819668094816	0.429067898585407	no
LOC105199304	QH	9.69700912618455	-0.156919105199937	1.54693179210804	5.01297097053631	2.90769687743666	43QH	south_america	7.92066784797297	-0.621759432634339	-0.300491805654181	no
LOC105199304	QH	9.69700912618455	-0.156919105199937	1.54693179210804	5.01297097053631	9.09402741714759	114CQH	south_america	14.1069983876839	0.747352011756753	0.584557846422188	no
LOC105199304	QT	13.7663241752989	0.182227205719409	1.1287051691787	4.67147865454718	4.84616146239444	114CQT	south_america	9.51764011694162	0.0437647545533021	-0.122673710502149	no
LOC105199304	QT	13.7663241752989	0.182227205719409	1.1287051691787	5.72109269143235	9.37929138355016	43QT	south_america	15.1003840749825	0.626940245745907	0.394002838092868	no
LOC105199304	QT	13.7663241752989	0.182227205719409	1.1287051691787	5.17418801320466	7.25807626241057	111BQT	south_america	12.4322642756152	0.419556325872021	0.210266707935168	no
LOC105199304	QT	13.7663241752989	0.182227205719409	1.1287051691787	4.43384683586007	7.01815935875083	112BQT	south_america	11.4520061946109	0.56129719013931	0.335844997233185	no
LOC105199304	QT	13.7663241752989	0.182227205719409	1.1287051691787	8.17508764545757	10.6157032317239	118QT	south_america	18.7907908771815	0.340282655119468	0.140032537916937	no
LOC105199304	QT	13.7663241752989	0.182227205719409	1.1287051691787	11.6307875097467	11.2782137410891	3QT	south_america	22.9090012508358	-0.0408439018624756	-0.19763452287917	no
LOC105199304	W	8.36315707598916	0.127073279071061	1.3566622902154	1.55077166796622	7.38974472643346	43CW	south_america	8.94051639439968	1.71769315261785	1.17245086343061	no
LOC105199304	W	8.36315707598916	0.127073279071061	1.3566622902154	3.89744032163468	6.68396129404841	104W	south_america	10.5814016156831	0.649822339360672	0.385319960656248	no
LOC105199304	W	8.36315707598916	0.127073279071061	1.3566622902154	1.74927396800566	5.5384702427365	28W	south_america	7.28774421074216	1.24990245849821	0.827640885668666	no
LOC105199304	W	8.36315707598916	0.127073279071061	1.3566622902154	6.46602663562927	10.0840499332091	114W	south_america	16.5500765688384	0.570072554541743	0.326536145852737	no
LOC105199304	W	8.36315707598916	0.127073279071061	1.3566622902154	7.78579775757864	0	3BW	south_america	7.78579775757864	-3.13517329006389	-2.40461210771695	no
LOC105199304	W	8.36315707598916	0.127073279071061	1.3566622902154	3.89289887878932	3.6880094641162	112W	south_america	7.58090834290552	-0.0617139847337086	-0.139155680206012	no
LOC105199307	QA	9.88498121174565	0.297259275323424	1.07755291546055	4.54701370857379	6.01556516464357	3QA	south_america	10.5625788732174	0.3388480392676	0.0385955653290593	no
LOC105199307	QA	9.88498121174565	0.297259275323424	1.07755291546055	5.03796994465807	7.84152110180441	118QA	south_america	12.8794910464625	0.550231017754252	0.2347650299129	no
LOC105199307	QA	9.88498121174565	0.297259275323424	1.07755291546055	3.89289887878932	5.00595610500331	111BQA	south_america	8.89885498379263	0.295704463886753	-0.00144290959113321	no
LOC105199307	QA	9.88498121174565	0.297259275323424	1.07755291546055	2.77115427241255	6.4362292778614	43QA	south_america	9.20738355027395	0.979565082667022	0.633199351562221	no
LOC105199307	QA	9.88498121174565	0.297259275323424	1.07755291546055	12.3656787914484	17.8571717567244	114CQA	south_america	30.2228505481729	0.49658020504221	0.184975537497011	no
LOC105199307	QA	9.88498121174565	0.297259275323424	1.07755291546055	0	0	112BQA	south_america	0	0	-0.27586513020233	no
LOC105199307	QH	5.0993837090249	-0.156919105199937	1.54693179210804	0	5.11539042214552	111BQH	south_america	5.11539042214552	2.61244460702949	1.79023000649276	no
LOC105199307	QH	5.0993837090249	-0.156919105199937	1.54693179210804	3.89289887878932	1.19047811711496	118QH	south_america	5.08337699590428	-1.15944366479438	-0.648072891583849	no
LOC105199307	QH	5.0993837090249	-0.156919105199937	1.54693179210804	1.70513014071517	2.90769687743666	112BQH	south_america	4.61282701815184	0.530620558734159	0.444453768059916	no
LOC105199307	QH	5.0993837090249	-0.156919105199937	1.54693179210804	3.57143435134488	3.69487236321673	3QH	south_america	7.26630671456161	0.0384390346730113	0.126287494296519	no
LOC105199307	QH	5.0993837090249	-0.156919105199937	1.54693179210804	7.51945645580446	0	114CQH	south_america	7.51945645580446	-3.09076138895698	-1.89655568443586	no
LOC105199307	QH	5.0993837090249	-0.156919105199937	1.54693179210804	0	0	43QH	south_america	0	0	0.10143892962863	no
LOC105199307	QT	6.64781522191902	0.182227205719409	1.1287051691787	0.830770536410475	3.38346412232673	3QT	south_america	4.21423465873721	1.25962046071854	0.954539134239186	no
LOC105199307	QT	6.64781522191902	0.182227205719409	1.1287051691787	2.14540975928713	6.82130282440011	43QT	south_america	8.96671258368725	1.3141609704645	1.00286044190685	no
LOC105199307	QT	6.64781522191902	0.182227205719409	1.1287051691787	1.1678696636368	3.87692916991555	114CQT	south_america	5.04479883355235	1.16969499775813	0.874867785674489	no
LOC105199307	QT	6.64781522191902	0.182227205719409	1.1287051691787	1.20923095523457	1.50389129116089	112BQT	south_america	2.71312224639546	0.180627680269527	-0.00141713309512541	no
LOC105199307	QT	6.64781522191902	0.182227205719409	1.1287051691787	0.583934831818398	7.66689677846729	118QT	south_america	8.25083161028569	2.45200254291218	2.01095502986344	no
LOC105199307	QT	6.64781522191902	0.182227205719409	1.1287051691787	3.05747473507548	7.25807626241057	111BQT	south_america	10.3155509974861	1.02522363021861	0.746870349776645	no
LOC105199307	W	22.7495571654225	0.127073279071061	1.3566622902154	19.4644943939466	2.50648548526815	3BW	south_america	21.9709798792148	-2.54502536202477	-1.96961223170107	no
LOC105199307	W	22.7495571654225	0.127073279071061	1.3566622902154	3.87692916991555	19.7059859371559	43CW	south_america	23.5829151070714	2.08600297511911	1.44393318084859	no
LOC105199307	W	22.7495571654225	0.127073279071061	1.3566622902154	9.62100682403112	14.9538696553885	28W	south_america	24.5748764794197	0.586985862449888	0.339002997795278	no
LOC105199307	W	22.7495571654225	0.127073279071061	1.3566622902154	7.30770060306503	7.51945645580446	104W	south_america	14.8271570588695	0.0363121643796774	-0.0669003003518092	no
LOC105199307	W	22.7495571654225	0.127073279071061	1.3566622902154	14.9227790353591	8.60535541627113	112W	south_america	23.5281344516302	-0.729181251959497	-0.631147881979244	no
LOC105199307	W	22.7495571654225	0.127073279071061	1.3566622902154	1.84743618160836	0	114W	south_america	1.84743618160836	-1.5096635077775	-1.20644378387542	no
LOC105199309	QA	60.2064198711383	0.297259275323424	1.07755291546055	21.4113722647968	25.0928675257741	118QA	south_america	46.5042397905709	0.219424511778727	-0.0722328921651433	no
LOC105199309	QA	60.2064198711383	0.297259275323424	1.07755291546055	37.8917809047816	75.1945645580446	3QA	south_america	113.086345462826	0.970222785643741	0.624529432072199	no
LOC105199309	QA	60.2064198711383	0.297259275323424	1.07755291546055	21.983428962575	45.2381684503685	114CQA	south_america	67.2215974129435	1.00849019829648	0.660042688176544	no
LOC105199309	QA	60.2064198711383	0.297259275323424	1.07755291546055	44.3384683586007	62.2168830193269	43QA	south_america	106.555351377928	0.479574249039264	0.16919352274957	no
LOC105199309	QA	60.2064198711383	0.297259275323424	1.07755291546055	0	0	112BQA	south_america	0	0	-0.27586513020233	no
LOC105199309	QA	60.2064198711383	0.297259275323424	1.07755291546055	16.0041398350228	37.1871024943103	111BQA	south_america	53.1912423293331	1.16719942912044	0.807329404723672	no
LOC105199309	QH	15.6266601359803	-0.156919105199937	1.54693179210804	14.2857374053795	9.23718090804182	3QH	south_america	23.5229183134214	-0.578367667633412	-0.272441593471396	no
LOC105199309	QH	15.6266601359803	-0.156919105199937	1.54693179210804	10.3810636767715	10.7143030540347	118QH	south_america	21.0953667308062	0.0416357246323597	0.128353965472338	no
LOC105199309	QH	15.6266601359803	-0.156919105199937	1.54693179210804	3.41026028143035	8.72309063230999	112BQH	south_america	12.1333509137403	1.14055116711369	0.838737867392034	no
LOC105199309	QH	15.6266601359803	-0.156919105199937	1.54693179210804	5.01297097053631	5.81539375487332	43QH	south_america	10.8283647254096	0.18071901669409	0.218263095772258	no
LOC105199309	QH	15.6266601359803	-0.156919105199937	1.54693179210804	2.72820822514428	8.52565070357586	111BQH	south_america	11.2538589287201	1.35333520885116	0.97629017759926	no
LOC105199309	QH	15.6266601359803	-0.156919105199937	1.54693179210804	10.0259419410726	9.09402741714759	114CQH	south_america	19.1199693582202	-0.127399999444582	0.0190823576746901	no
LOC105199309	QT	36.4622249727092	0.182227205719409	1.1287051691787	9.67384764187652	14.0363187175017	112BQT	south_america	23.7101663593782	0.494371077311719	0.27655040493829	no
LOC105199309	QT	36.4622249727092	0.182227205719409	1.1287051691787	15.0521833111408	31.7972864829415	111BQT	south_america	46.8494697940824	1.03080692045913	0.751816982779649	no
LOC105199309	QT	36.4622249727092	0.182227205719409	1.1287051691787	23.3573932727359	29.4880645325665	118QT	south_america	52.8454578053024	0.323884822607366	0.125504534537601	no
LOC105199309	QT	36.4622249727092	0.182227205719409	1.1287051691787	8.17508764545757	9.69232292478887	114CQT	south_america	17.8674105702464	0.22078147043983	0.0341579588480796	no
LOC105199309	QT	36.4622249727092	0.182227205719409	1.1287051691787	17.44618126462	56.3910687054455	3QT	south_america	73.8372499700655	1.63750405981541	1.28933302853121	no
LOC105199309	QT	36.4622249727092	0.182227205719409	1.1287051691787	10.7270487964357	15.3479313549003	43QT	south_america	26.0749801513359	0.479268097045063	0.263169603043278	no
LOC105199309	W	85.8361634125051	0.127073279071061	1.3566622902154	16.6269256344753	27.731137316325	114W	south_america	44.3580629508003	0.704834231011295	0.425869397349066	no
LOC105199309	W	85.8361634125051	0.127073279071061	1.3566622902154	38.9289887878932	10.0259419410726	3BW	south_america	48.9549307289658	-1.85653462599208	-1.46212356558404	no
LOC105199309	W	85.8361634125051	0.127073279071061	1.3566622902154	26.7949022112384	60.1556516464357	104W	south_america	86.9505538576741	1.13766552395556	0.744910691609221	no
LOC105199309	W	85.8361634125051	0.127073279071061	1.3566622902154	35.860116344116	63.6924077914697	28W	south_america	99.5525241355857	0.811535784870599	0.504519445064598	no
LOC105199309	W	85.8361634125051	0.127073279071061	1.3566622902154	33.0896404697092	51.6321324976268	112W	south_america	84.721772967336	0.626610465721488	0.368210416293885	no
LOC105199309	W	85.8361634125051	0.127073279071061	1.3566622902154	40.3200633671217	83.7504402329125	43CW	south_america	124.070503600034	1.03637839561709	0.670251633810547	no
LOC105199310	QA	11.8286014994559	0.297259275323424	1.07755291546055	18.5485181871726	23.8095623422992	114CQA	south_america	42.3580805294719	0.343837032525398	0.0432254941114111	no
LOC105199310	QA	11.8286014994559	0.297259275323424	1.07755291546055	3.78917809047816	5.0129709705363	3QA	south_america	8.80214906101446	0.328299908837651	0.0288065978652747	no
LOC105199310	QA	11.8286014994559	0.297259275323424	1.07755291546055	6.92720867390485	7.84152110180441	118QA	south_america	14.7687297757093	0.157481639240885	-0.129717653840506	no
LOC105199310	QA	11.8286014994559	0.297259275323424	1.07755291546055	4.97425967845302	5.36352439821783	111BQA	south_america	10.3377840766709	0.0910660669877929	-0.191353209088116	no
LOC105199310	QA	11.8286014994559	0.297259275323424	1.07755291546055	8.31346281723764	5.00595610500331	43QA	south_america	13.319418922241	-0.632923741776216	-0.86323650908789	no
LOC105199310	QA	11.8286014994559	0.297259275323424	1.07755291546055	0	0	112BQA	south_america	0	0	-0.27586513020233	no
LOC105199310	QH	15.0589930395875	-0.156919105199937	1.54693179210804	12.5324274263408	5.81539375487332	43QH	south_america	18.3478211812141	-0.989551735675435	-0.538247797817156	no
LOC105199310	QH	15.0589930395875	-0.156919105199937	1.54693179210804	7.78579775757864	4.76191246845985	118QH	south_america	12.5477102260385	-0.608625545962864	-0.292001523963365	no
LOC105199310	QH	15.0589930395875	-0.156919105199937	1.54693179210804	4.09231233771641	10.230780844291	111BQH	south_america	14.3230931820075	1.14106542273842	0.839070303267586	no
LOC105199310	QH	15.0589930395875	-0.156919105199937	1.54693179210804	12.5324274263408	4.54701370857379	114CQH	south_america	17.0794411349146	-1.28663745500498	-0.73029616145231	no
LOC105199310	QH	15.0589930395875	-0.156919105199937	1.54693179210804	8.52565070357586	7.26924219359166	112BQH	south_america	15.7948928971675	-0.204062522832911	-0.03047543393541	no
LOC105199310	QH	15.0589930395875	-0.156919105199937	1.54693179210804	3.57143435134488	0	3QH	south_america	3.57143435134488	-2.19264690202237	-1.31597773554599	no
LOC105199310	QT	10.4079510134821	0.182227205719409	1.1287051691787	2.33573932727359	0.969232292478887	114CQT	south_america	3.30497161975248	-0.760373250257045	-0.835116628961961	no
LOC105199310	QT	10.4079510134821	0.182227205719409	1.1287051691787	3.05747473507548	3.45622679162408	111BQT	south_america	6.51370152669956	0.135240546423719	-0.0416288155478896	no
LOC105199310	QT	10.4079510134821	0.182227205719409	1.1287051691787	5.64307779109464	6.01556516464357	112BQT	south_america	11.6586429557382	0.0787075215131987	-0.0917154337846583	no
LOC105199310	QT	10.4079510134821	0.182227205719409	1.1287051691787	6.6461642912838	10.1503923669802	3QT	south_america	16.796556658264	0.544286373036346	0.320773907308663	no
LOC105199310	QT	10.4079510134821	0.182227205719409	1.1287051691787	3.50360899091039	5.8976129065133	118QT	south_america	9.40122189742369	0.615015590912155	0.383437940226378	no
LOC105199310	QT	10.4079510134821	0.182227205719409	1.1287051691787	7.15136586429044	4.26331426525007	43QT	south_america	11.4146801295405	-0.631070282635092	-0.720557954869912	no
LOC105199310	W	14.0145711532934	0.127073279071061	1.3566622902154	7.7538583398311	4.92649648428897	43CW	south_america	12.6803548241201	-0.562739546409525	-0.508463182367267	no
LOC105199310	W	14.0145711532934	0.127073279071061	1.3566622902154	0	0	3BW	south_america	0	0	-0.093666109825228	no
LOC105199310	W	14.0145711532934	0.127073279071061	1.3566622902154	6.46602663562927	8.82354369155795	114W	south_america	15.2895703271872	0.395902892792704	0.198155145654532	no
LOC105199310	W	14.0145711532934	0.127073279071061	1.3566622902154	8.30905134802687	9.9692464369257	28W	south_america	18.2782977849526	0.236758358653311	0.0808492138193325	no
LOC105199310	W	14.0145711532934	0.127073279071061	1.3566622902154	10.3810636767715	7.99068717225177	112W	south_america	18.3717508490233	-0.340132106048767	-0.344378544674998	no
LOC105199310	W	14.0145711532934	0.127073279071061	1.3566622902154	4.38462036183902	8.35495161756051	104W	south_america	12.7395719793995	0.796885559731721	0.493720718480584	no
LOC105199311	QA	19.701327091907	0.297259275323424	1.07755291546055	7.5569549169871	6.27321688144353	118QA	south_america	13.8301717984306	-0.234503892707366	-0.493491466081287	no
LOC105199311	QA	19.701327091907	0.297259275323424	1.07755291546055	7.57835618095632	12.0311303292871	3QA	south_america	19.6094865102435	0.603189105395403	0.283911653601925	no
LOC105199311	QA	19.701327091907	0.297259275323424	1.07755291546055	6.92070911784768	12.8724585557228	111BQA	south_america	19.7931676735705	0.808521991458464	0.474466458954849	no
LOC105199311	QA	19.701327091907	0.297259275323424	1.07755291546055	16.4875717219312	26.1905185765292	114CQA	south_america	42.6780902984604	0.636773692309654	0.315079113159952	no
LOC105199311	QA	19.701327091907	0.297259275323424	1.07755291546055	11.0846170896502	12.8724585557228	43QA	south_america	23.957075645373	0.199051731981925	-0.091139415923278	no
LOC105199311	QA	19.701327091907	0.297259275323424	1.07755291546055	0	0	112BQA	south_america	0	0	-0.27586513020233	no
LOC105199311	QH	22.4936234976194	-0.156919105199937	1.54693179210804	15.5715955151573	11.9047811711496	118QH	south_america	27.4763766863069	-0.360806834511429	-0.131801369880472	no
LOC105199311	QH	22.4936234976194	-0.156919105199937	1.54693179210804	10.230780844291	8.72309063230999	112BQH	south_america	18.953871476601	-0.207971363299356	-0.0330022683352117	no
LOC105199311	QH	22.4936234976194	-0.156919105199937	1.54693179210804	15.0389129116089	9.09402741714759	114CQH	south_america	24.1329403287565	-0.668074451489595	-0.330431728727416	no
LOC105199311	QH	22.4936234976194	-0.156919105199937	1.54693179210804	5.45641645028855	5.11539042214552	111BQH	south_america	10.5718068724341	-0.0782890309711089	0.0508296969717568	no
LOC105199311	QH	22.4936234976194	-0.156919105199937	1.54693179210804	15.0389129116089	5.81539375487332	43QH	south_america	20.8543066664822	-1.23470744655226	-0.696726479377346	no
LOC105199311	QH	22.4936234976194	-0.156919105199937	1.54693179210804	21.4286061080693	11.0846170896502	3QH	south_america	32.5132231977195	-0.892168201738189	-0.475295097230055	no
LOC105199311	QT	18.3761080674243	0.182227205719409	1.1287051691787	9.27077065679834	9.02334774696535	112BQT	south_america	18.2941184037637	-0.0351799950721102	-0.192616465954272	no
LOC105199311	QT	18.3761080674243	0.182227205719409	1.1287051691787	13.5875951421518	9.37929138355016	43QT	south_america	22.966886525702	-0.491034114226	-0.596489976594426	no
LOC105199311	QT	18.3761080674243	0.182227205719409	1.1287051691787	8.17508764545757	3.87692916991555	114CQT	south_america	12.0520168153731	-0.911748919890685	-0.969231076000232	no
LOC105199311	QT	18.3761080674243	0.182227205719409	1.1287051691787	8.30770536410475	10.1503923669802	3QT	south_america	18.4580977310849	0.260597029501696	0.0694333878521288	no
LOC105199311	QT	18.3761080674243	0.182227205719409	1.1287051691787	18.6859146181887	11.7952258130266	118QT	south_america	30.4811404312153	-0.621558133833188	-0.712130467283561	no
LOC105199311	QT	18.3761080674243	0.182227205719409	1.1287051691787	4.70380728473151	8.29494429989779	111BQT	south_america	12.9987515846293	0.704520981714764	0.462737117059012	no
LOC105199311	W	23.3232896532065	0.127073279071061	1.3566622902154	8.74636984002829	9.41539941265205	28W	south_america	18.1617692526803	0.0957812914917451	-0.0230654215164685	no
LOC105199311	W	23.3232896532065	0.127073279071061	1.3566622902154	12.9320532712585	12.6050624165114	114W	south_america	25.5371156877699	-0.0342643190900014	-0.118922446156771	no
LOC105199311	W	23.3232896532065	0.127073279071061	1.3566622902154	8.2820606834737	13.3679225880968	104W	south_america	21.6499832715705	0.630334447637573	0.370955374964104	no
LOC105199311	W	23.3232896532065	0.127073279071061	1.3566622902154	23.3573932727359	10.0259419410726	3BW	south_america	33.3833352138085	-1.1434578345278	-0.936512441425006	no
LOC105199311	W	23.3232896532065	0.127073279071061	1.3566622902154	7.7538583398311	17.2427376950114	43CW	south_america	24.9965960348425	1.05933130885224	0.687170297652458	no
LOC105199311	W	23.3232896532065	0.127073279071061	1.3566622902154	14.2739625555608	6.14668244019367	112W	south_america	20.4206449957545	-1.09572880277172	-0.901331223445916	no
LOC105199313	QA	47.7356318442024	0.297259275323424	1.07755291546055	20.1518797786323	20.3879548646915	118QA	south_america	40.5398346433237	0.0160126552057966	-0.26100492707351	no
LOC105199313	QA	47.7356318442024	0.297259275323424	1.07755291546055	32.9751434438625	42.8572122161386	114CQA	south_america	75.8323556600011	0.368334467911982	0.0659598165146069	no
LOC105199313	QA	47.7356318442024	0.297259275323424	1.07755291546055	26.3259655879192	28.6054634571618	43QA	south_america	54.931429045081	0.115590962787416	-0.168593402634304	no
LOC105199313	QA	47.7356318442024	0.297259275323424	1.07755291546055	0	0	112BQA	south_america	0	0	-0.27586513020233	no
LOC105199313	QA	47.7356318442024	0.297259275323424	1.07755291546055	31.8290959600165	50.129709705363	3QA	south_america	81.9588056653796	0.639186813127359	0.317318558465219	no
LOC105199313	QA	47.7356318442024	0.297259275323424	1.07755291546055	5.83934831818398	11.7997536760792	111BQA	south_america	17.6391019942632	0.904185275920191	0.56324472969141	no
LOC105199313	QH	49.133049311644	-0.156919105199937	1.54693179210804	57.1429496215181	16.6269256344753	3QH	south_america	73.7698752559934	-1.72182339020245	-1.01161815471514	no
LOC105199313	QH	49.133049311644	-0.156919105199937	1.54693179210804	23.3573932727359	9.52382493691969	118QH	south_america	32.8812182096556	-1.21070058965275	-0.68120746488557	no
LOC105199313	QH	49.133049311644	-0.156919105199937	1.54693179210804	23.8718219700124	29.0769687743666	112BQH	south_america	52.948790744379	0.274146981076023	0.278658754364688	no
LOC105199313	QH	49.133049311644	-0.156919105199937	1.54693179210804	20.0518838821452	27.2820822514428	114CQH	south_america	47.333966133588	0.425938999263172	0.37678332518387	no
LOC105199313	QH	49.133049311644	-0.156919105199937	1.54693179210804	45.1167387348267	5.81539375487332	43QH	south_america	50.9321324897001	-2.7584215773591	-1.68171763320866	no
LOC105199313	QH	49.133049311644	-0.156919105199937	1.54693179210804	19.0974575760099	17.0513014071517	111BQH	south_america	36.1487589831617	-0.154910153314302	0.00129866869107196	no
LOC105199313	QT	26.4715429666247	0.182227205719409	1.1287051691787	14.3027317285809	11.9372799427002	43QT	south_america	26.2400116712811	-0.242254891747876	-0.376078810533099	no
LOC105199313	QT	26.4715429666247	0.182227205719409	1.1287051691787	21.6000339466724	36.0902839714851	3QT	south_america	57.6903179181575	0.714716373817382	0.471769938367021	no
LOC105199313	QT	26.4715429666247	0.182227205719409	1.1287051691787	9.34295730909437	12.6000198022255	114CQT	south_america	21.9429771113199	0.394960005024296	0.188475081991235	no
LOC105199313	QT	26.4715429666247	0.182227205719409	1.1287051691787	13.3015405075802	22.5583693674134	112BQT	south_america	35.8599098749936	0.720069127034509	0.476512322262562	no
LOC105199313	QT	26.4715429666247	0.182227205719409	1.1287051691787	14.0144359636416	10.6157032317239	118QT	south_america	24.6301391953655	-0.370273779575068	-0.489499827219276	no
LOC105199313	QT	26.4715429666247	0.182227205719409	1.1287051691787	10.1131856621727	16.5898885997956	111BQT	south_america	26.7030742619683	0.66247391265973	0.425484635008602	no
LOC105199313	W	55.2918383321483	0.127073279071061	1.3566622902154	24.3590020102168	30.0778258232178	104W	south_america	54.4368278334346	0.293387607513732	0.122590809549417	no
LOC105199313	W	55.2918383321483	0.127073279071061	1.3566622902154	33.7384569495075	41.7974405933169	112W	south_america	75.5358975428244	0.300990849729396	0.128195183070006	no
LOC105199313	W	55.2918383321483	0.127073279071061	1.3566622902154	23.3573932727359	30.0778258232178	3BW	south_america	53.4352190959538	0.351525833287357	0.165444676862552	no
LOC105199313	W	55.2918383321483	0.127073279071061	1.3566622902154	19.3846458495777	34.4854753900228	43CW	south_america	53.8701212396006	0.799745741354903	0.495828967264243	no
LOC105199313	W	55.2918383321483	0.127073279071061	1.3566622902154	28.6352608149296	41.5967059744875	114W	south_america	70.2319667894171	0.523427115926816	0.292153647753286	no
LOC105199313	W	55.2918383321483	0.127073279071061	1.3566622902154	26.2391095200849	29.9077393107771	28W	south_america	56.146848830862	0.182288594154497	0.040699380738791	no
LOC105199314	QA	23.2370839446321	0.297259275323424	1.07755291546055	1.51390511952918	2.86054634571618	111BQA	south_america	4.37445146524536	0.618874832382737	0.298468457970673	no
LOC105199314	QA	23.2370839446321	0.297259275323424	1.07755291546055	10.6096986533388	20.0518838821452	3QA	south_america	30.6615825354841	0.858618816921091	0.520957749307134	no
LOC105199314	QA	23.2370839446321	0.297259275323424	1.07755291546055	13.7396431016094	16.6666936396095	114CQA	south_america	30.4063367412188	0.261330469461631	-0.0333429619523017	no
LOC105199314	QA	23.2370839446321	0.297259275323424	1.07755291546055	0	0	112BQA	south_america	0	0	-0.27586513020233	no
LOC105199314	QA	23.2370839446321	0.297259275323424	1.07755291546055	11.0846170896502	17.1632780742971	43QA	south_america	28.2478951639473	0.58785284008755	0.269679159691128	no
LOC105199314	QA	23.2370839446321	0.297259275323424	1.07755291546055	8.81644740315162	9.40982532216529	118QA	south_america	18.2262727253169	0.084672951117502	-0.197286203912374	no
LOC105199314	QH	11.4430415626774	-0.156919105199937	1.54693179210804	0	7.38974472643346	3QH	south_america	7.38974472643346	3.0686269146566	2.08512491391816	no
LOC105199314	QH	11.4430415626774	-0.156919105199937	1.54693179210804	10.230780844291	5.81539375487333	112BQH	south_america	16.0461745991644	-0.720589322409683	-0.364379489829749	no
LOC105199314	QH	11.4430415626774	-0.156919105199937	1.54693179210804	2.50648548526815	11.3675342714345	114CQH	south_america	13.8740197567026	1.81846023607642	1.27696602484617	no
LOC105199314	QH	11.4430415626774	-0.156919105199937	1.54693179210804	5.19053183838576	4.76191246845985	118QH	south_america	9.95244430684561	-0.103515614876733	0.0345222010405706	no
LOC105199314	QH	11.4430415626774	-0.156919105199937	1.54693179210804	10.0259419410726	2.90769687743666	43QH	south_america	12.9336388185093	-1.49651144383567	-0.865967294401679	no
LOC105199314	QH	11.4430415626774	-0.156919105199937	1.54693179210804	6.82052056286069	1.70513014071517	111BQH	south_america	8.52565070357586	-1.5315666397338	-0.888628407242573	no
LOC105199314	QT	7.6056942348231	0.182227205719409	1.1287051691787	0.583934831818398	1.17952258130266	118QT	south_america	1.76345741312106	0.460499171531959	0.246540880126414	no
LOC105199314	QT	7.6056942348231	0.182227205719409	1.1287051691787	0	1.38249071664963	111BQT	south_america	1.38249071664963	1.25247059269991	0.948204558821378	no
LOC105199314	QT	7.6056942348231	0.182227205719409	1.1287051691787	4.83692382093826	16.0415071057162	112BQT	south_america	20.8784309266544	1.54577278482678	1.20806178295396	no
LOC105199314	QT	7.6056942348231	0.182227205719409	1.1287051691787	1.43027317285809	5.11597711830009	43QT	south_america	6.54625029115817	1.33146452125931	1.01819088538076	no
LOC105199314	QT	7.6056942348231	0.182227205719409	1.1287051691787	9.34295730909437	7.7538583398311	114CQT	south_america	17.0968156489255	-0.240657804355253	-0.374663837485899	no
LOC105199314	QT	7.6056942348231	0.182227205719409	1.1287051691787	4.15385268205238	4.51128549643564	3QT	south_america	8.66513817848802	0.0967375640809484	-0.0757413396987162	no
LOC105199314	W	25.9521866876496	0.127073279071061	1.3566622902154	10.4956438080339	12.1846345340203	28W	south_america	22.6802783420542	0.197770315808528	0.0521110059941618	no
LOC105199314	W	25.9521866876496	0.127073279071061	1.3566622902154	11.0298801565697	20.8987202966585	112W	south_america	31.9286004532282	0.864224294758162	0.543356309822737	no
LOC105199314	W	25.9521866876496	0.127073279071061	1.3566622902154	11.678696636368	17.5453983968771	3BW	south_america	29.224095033245	0.548654815732941	0.31074906386242	no
LOC105199314	W	25.9521866876496	0.127073279071061	1.3566622902154	0.97436008040867	3.3419806470242	104W	south_america	4.31634072743287	1.13696816558012	0.744396666578475	no
LOC105199314	W	25.9521866876496	0.127073279071061	1.3566622902154	0	2.52101248330227	114W	south_america	2.52101248330227	1.81599034210203	1.24490602798639	no
LOC105199314	W	25.9521866876496	0.127073279071061	1.3566622902154	10.8554016757635	19.7059859371559	43CW	south_america	30.5613876129194	0.804503355823667	0.499335819708714	no
LOC105199317	QA	1.21643368348267	0.297259275323424	1.07755291546055	0.686982155080468	1.19047811711496	114CQA	south_america	1.87746027219543	0.376801089344715	0.0738170839501603	no
LOC105199317	QA	1.21643368348267	0.297259275323424	1.07755291546055	0	0	112BQA	south_america	0	0	-0.27586513020233	no
LOC105199317	QA	1.21643368348267	0.297259275323424	1.07755291546055	0.21627215993274	0	111BQA	south_america	0.21627215993274	-0.282466090501827	-0.538001760755736	no
LOC105199317	QA	1.21643368348267	0.297259275323424	1.07755291546055	0	1.43027317285809	43QA	south_america	1.43027317285809	1.28111848789579	0.913049557433443	no
LOC105199317	QA	1.21643368348267	0.297259275323424	1.07755291546055	0	1.00259419410726	3QA	south_america	1.00259419410726	1.00187010289637	0.653899049840907	no
LOC105199317	QA	1.21643368348267	0.297259275323424	1.07755291546055	3.77847745849355	3.13660844072176	118QA	south_america	6.91508589921532	-0.208102610244108	-0.468990319005856	no
LOC105199317	QH	3.49084731638761	-0.156919105199937	1.54693179210804	0	3.41026028143035	111BQH	south_america	3.41026028143035	2.14086380218821	1.48538088046979	no
LOC105199317	QH	3.49084731638761	-0.156919105199937	1.54693179210804	3.57143435134488	0	3QH	south_america	3.57143435134488	-2.19264690202237	-1.31597773554599	no
LOC105199317	QH	3.49084731638761	-0.156919105199937	1.54693179210804	2.50648548526815	2.90769687743666	43QH	south_america	5.41418236270482	0.156292804725876	0.202472993007011	no
LOC105199317	QH	3.49084731638761	-0.156919105199937	1.54693179210804	0	2.90769687743666	112BQH	south_america	2.90769687743666	1.96631856086315	1.37254769531222	no
LOC105199317	QH	3.49084731638761	-0.156919105199937	1.54693179210804	2.50648548526815	2.2735068542869	114CQH	south_america	4.77999233955505	-0.0991887563966214	0.0373192593867666	no
LOC105199317	QH	3.49084731638761	-0.156919105199937	1.54693179210804	1.29763295959644	1.19047811711496	118QH	south_america	2.4881110767114	-0.0689025477111262	0.0568975037799623	no
LOC105199317	QT	1.03903510230077	0.182227205719409	1.1287051691787	0.403076985078189	0.501297097053631	112BQT	south_america	0.904374082131819	0.0976153352938308	-0.0749636598963625	no
LOC105199317	QT	1.03903510230077	0.182227205719409	1.1287051691787	0.235190364236576	0	111BQT	south_america	0.235190364236576	-0.304733403247833	-0.431432957219092	no
LOC105199317	QT	1.03903510230077	0.182227205719409	1.1287051691787	0.583934831818398	0.58976129065133	118QT	south_america	1.17369612246973	0.00529717552244512	-0.156754868346804	no
LOC105199317	QT	1.03903510230077	0.182227205719409	1.1287051691787	0.830770536410475	1.12782137410891	3QT	south_america	1.95859191051939	0.216926065710017	0.0307421822262555	no
LOC105199317	QT	1.03903510230077	0.182227205719409	1.1287051691787	0.715136586429044	0	43QT	south_america	0.715136586429044	-0.778323471277037	-0.85102000347477	no
LOC105199317	QT	1.03903510230077	0.182227205719409	1.1287051691787	2.33573932727359	0	114CQT	south_america	2.33573932727359	-1.73800655318803	-1.70127134290055	no
LOC105199317	W	2.60778704037485	0.127073279071061	1.3566622902154	0	1.22933648803873	112W	south_america	1.22933648803873	1.15661438823829	0.758877958496043	no
LOC105199317	W	2.60778704037485	0.127073279071061	1.3566622902154	3.89289887878932	0	3BW	south_america	3.89289887878932	-2.29068946699808	-1.78214045124323	no
LOC105199317	W	2.60778704037485	0.127073279071061	1.3566622902154	0.437318492001414	0.55384702427365	28W	south_america	0.991165516275064	0.112464697288836	-0.0107680311361094	no
LOC105199317	W	2.60778704037485	0.127073279071061	1.3566622902154	5.54230854482509	2.52101248330227	114W	south_america	8.06332102812736	-0.893809458528121	-0.752495845843181	no
LOC105199317	W	2.60778704037485	0.127073279071061	1.3566622902154	0.487180040204335	0.835495161756051	104W	south_america	1.32267520196039	0.303589998845666	0.130111023979726	no
LOC105199317	W	2.60778704037485	0.127073279071061	1.3566622902154	1.55077166796622	2.46324824214449	43CW	south_america	4.01401991011071	0.441192040129662	0.231537917228265	no
LOC105199320	QA	1.29920163582357	0.297259275323424	1.07755291546055	12.1253698895301	16.0415071057162	3QA	south_america	28.1668769952463	0.37669484900785	0.0737184898715387	no
LOC105199320	QA	1.29920163582357	0.297259275323424	1.07755291546055	0	0.715136586429044	111BQA	south_america	0.715136586429044	0.778323471277037	0.446441366406592	no
LOC105199320	QA	1.29920163582357	0.297259275323424	1.07755291546055	0.692788568103137	0.715136586429044	43QA	south_america	1.40792515453218	0.0189216816216069	-0.258305267155122	no
LOC105199320	QA	1.29920163582357	0.297259275323424	1.07755291546055	0	0	112BQA	south_america	0	0	-0.27586513020233	no
LOC105199320	QA	1.29920163582357	0.297259275323424	1.07755291546055	0	1.19047811711496	114CQA	south_america	1.19047811711496	1.1312458022037	0.773963408120731	no
LOC105199320	QA	1.29920163582357	0.297259275323424	1.07755291546055	20.1518797786323	19.603802754511	118QA	south_america	39.7556825331433	-0.0378752481562567	-0.311014446410221	no
LOC105199320	QH	39.3038279795311	-0.156919105199937	1.54693179210804	23.3573932727359	19.0476498738394	118QH	south_america	42.4050431465753	-0.280926620580747	-0.0801635314585021	no
LOC105199320	QH	39.3038279795311	-0.156919105199937	1.54693179210804	18.7564315478669	17.44618126462	112BQH	south_america	36.2026128124869	-0.0990002076280516	0.0374411450248612	no
LOC105199320	QH	39.3038279795311	-0.156919105199937	1.54693179210804	7.51945645580446	2.2735068542869	114CQH	south_america	9.79296331009136	-1.37992438921633	-0.79060065237251	no
LOC105199320	QH	39.3038279795311	-0.156919105199937	1.54693179210804	23.1897699137263	30.6923425328731	111BQH	south_america	53.8821124465995	0.389737253289216	0.353381035465185	no
LOC105199320	QH	39.3038279795311	-0.156919105199937	1.54693179210804	5.01297097053631	2.90769687743666	43QH	south_america	7.92066784797297	-0.621759432634339	-0.300491805654181	no
LOC105199320	QH	39.3038279795311	-0.156919105199937	1.54693179210804	57.1429496215181	36.9487236321673	3QH	south_america	94.0916732536854	-0.615552899152455	-0.296479648483743	no
LOC105199320	QT	2.43638552961577	0.182227205719409	1.1287051691787	2.33573932727359	0.969232292478887	114CQT	south_america	3.30497161975248	-0.760373250257045	-0.835116628961961	no
LOC105199320	QT	2.43638552961577	0.182227205719409	1.1287051691787	0.715136586429044	0.852662853050014	43QT	south_america	1.56779943947906	0.111276892825549	-0.0628599166826597	no
LOC105199320	QT	2.43638552961577	0.182227205719409	1.1287051691787	0	1.03686803748722	111BQT	south_america	1.03686803748722	1.02635251548801	0.747870509340214	no
LOC105199320	QT	2.43638552961577	0.182227205719409	1.1287051691787	78.2472674636654	62.514696809041	118QT	south_america	140.761964272706	-0.319270731361201	-0.44431260773398	no
LOC105199320	QT	2.43638552961577	0.182227205719409	1.1287051691787	0.806153970156377	0.501297097053631	112BQT	south_america	1.30745106721001	-0.266711378948565	-0.397746547926811	no
LOC105199320	QT	2.43638552961577	0.182227205719409	1.1287051691787	19.1077223374409	22.5564274821782	3QT	south_america	41.6641498196191	0.228371087223396	0.0408821389004213	no
LOC105199320	W	1.37557960511843	0.127073279071061	1.3566622902154	0.487180040204335	0.835495161756051	104W	south_america	1.32267520196039	0.303589998845666	0.130111023979726	no
LOC105199320	W	1.37557960511843	0.127073279071061	1.3566622902154	0.874636984002829	0.55384702427365	28W	south_america	1.42848400827648	-0.270766772610698	-0.29324914133096	no
LOC105199320	W	1.37557960511843	0.127073279071061	1.3566622902154	0.64881647979822	0	112W	south_america	0.64881647979822	-0.721430829691621	-0.625435021583717	no
LOC105199320	W	1.37557960511843	0.127073279071061	1.3566622902154	1.84743618160836	1.26050624165114	114W	south_america	3.1079424232595	-0.333017606583022	-0.339134424957765	no
LOC105199320	W	1.37557960511843	0.127073279071061	1.3566622902154	0	1.23162412107224	43CW	south_america	1.23162412107224	1.15809405031617	0.759968622022668	no
LOC105199320	W	1.37557960511843	0.127073279071061	1.3566622902154	0	2.50648548526815	3BW	south_america	2.50648548526815	1.81002575613728	1.24050951309262	no
LOC105199322	QA	0.423009201507499	0.297259275323424	1.07755291546055	0.629746243082259	0	118QA	south_america	0.629746243082259	-0.70464734951994	-0.929798073457162	no
LOC105199322	QA	0.423009201507499	0.297259275323424	1.07755291546055	0	0.715136586429044	43QA	south_america	0.715136586429044	0.778323471277037	0.446441366406592	no
LOC105199322	QA	0.423009201507499	0.297259275323424	1.07755291546055	0	0	112BQA	south_america	0	0	-0.27586513020233	no
LOC105199322	QA	0.423009201507499	0.297259275323424	1.07755291546055	0	1.19047811711496	114CQA	south_america	1.19047811711496	1.1312458022037	0.773963408120731	no
LOC105199322	QA	0.423009201507499	0.297259275323424	1.07755291546055	0	0	3QA	south_america	0	0	-0.27586513020233	no
LOC105199322	QA	0.423009201507499	0.297259275323424	1.07755291546055	0.21627215993274	0	111BQA	south_america	0.21627215993274	-0.282466090501827	-0.538001760755736	no
LOC105199322	QH	1.53461712664366	-0.156919105199937	1.54693179210804	0	0	118QH	south_america	0	0	0.10143892962863	no
LOC105199322	QH	1.53461712664366	-0.156919105199937	1.54693179210804	2.50648548526815	0	114CQH	south_america	2.50648548526815	-1.81002575613728	-1.06863577267658	no
LOC105199322	QH	1.53461712664366	-0.156919105199937	1.54693179210804	1.70513014071517	0	112BQH	south_america	1.70513014071517	-1.43569800212899	-0.826654997623675	no
LOC105199322	QH	1.53461712664366	-0.156919105199937	1.54693179210804	0	0	3QH	south_america	0	0	0.10143892962863	no
LOC105199322	QH	1.53461712664366	-0.156919105199937	1.54693179210804	0	2.90769687743666	43QH	south_america	2.90769687743666	1.96631856086315	1.37254769531222	no
LOC105199322	QH	1.53461712664366	-0.156919105199937	1.54693179210804	1.36410411257214	0	111BQH	south_america	1.36410411257214	-1.24129357163393	-0.700984020088105	no
LOC105199322	QT	0.721212071850672	0.182227205719409	1.1287051691787	0	0.501297097053631	112BQT	south_america	0.501297097053631	0.586209505294724	0.357916584956613	no
LOC105199322	QT	0.721212071850672	0.182227205719409	1.1287051691787	0.470380728473151	0	111BQT	south_america	0.470380728473151	-0.55618976319877	-0.654215989331819	no
LOC105199322	QT	0.721212071850672	0.182227205719409	1.1287051691787	0	1.12782137410891	3QT	south_america	1.12782137410891	1.0893770448693	0.8037084120116	no
LOC105199322	QT	0.721212071850672	0.182227205719409	1.1287051691787	0	0.58976129065133	118QT	south_america	0.58976129065133	0.668810155039405	0.431098361739636	no
LOC105199322	QT	0.721212071850672	0.182227205719409	1.1287051691787	0	0.852662853050014	43QT	south_america	0.852662853050014	0.889600364102586	0.626712074773164	no
LOC105199322	QT	0.721212071850672	0.182227205719409	1.1287051691787	0	0.969232292478887	114CQT	south_america	0.969232292478887	0.97763330293098	0.704706701919641	no
LOC105199322	W	0.725081702887709	0.127073279071061	1.3566622902154	3.89289887878932	0	3BW	south_america	3.89289887878932	-2.29068946699808	-1.78214045124323	no
LOC105199322	W	0.725081702887709	0.127073279071061	1.3566622902154	0	0.835495161756051	104W	south_america	0.835495161756051	0.876169311593684	0.552161018939864	no
LOC105199322	W	0.725081702887709	0.127073279071061	1.3566622902154	0	0.614668244019367	112W	south_america	0.614668244019367	0.691237773665631	0.415847406287823	no
LOC105199322	W	0.725081702887709	0.127073279071061	1.3566622902154	0	0.55384702427365	28W	south_america	0.55384702427365	0.635844477886412	0.375016835423777	no
LOC105199322	W	0.725081702887709	0.127073279071061	1.3566622902154	0	0	114W	south_america	0	0	-0.093666109825228	no
LOC105199322	W	0.725081702887709	0.127073279071061	1.3566622902154	0	1.23162412107224	43CW	south_america	1.23162412107224	1.15809405031617	0.759968622022668	no
LOC105199327	QA	29.0667559829215	0.297259275323424	1.07755291546055	7.35325343771316	22.1692341793004	111BQA	south_america	29.5224876170135	1.47180024390566	1.09000769403537	no
LOC105199327	QA	29.0667559829215	0.297259275323424	1.07755291546055	12.3656787914484	9.52382493691969	114CQA	south_america	21.8895037283681	-0.344873953690495	-0.595918047086784	no
LOC105199327	QA	29.0667559829215	0.297259275323424	1.07755291546055	0	0	112BQA	south_america	0	0	-0.27586513020233	no
LOC105199327	QA	29.0667559829215	0.297259275323424	1.07755291546055	36.0250055413631	12.8724585557228	43QA	south_america	48.8974640970859	-1.41627645852361	-1.59021028968649	no
LOC105199327	QA	29.0667559829215	0.297259275323424	1.07755291546055	17.6328948063032	10.9781295425262	118QA	south_america	28.6110243488294	-0.637449188629389	-0.86743625351644	no
LOC105199327	QA	29.0667559829215	0.297259275323424	1.07755291546055	24.2507397790602	14.0363187175017	3QA	south_america	38.2870584965619	-0.747874254665514	-0.969913880788164	no
LOC105199327	QH	21.3320780353814	-0.156919105199937	1.54693179210804	5.45641645028855	18.7564315478669	111BQH	south_america	24.2128479981555	1.61351684444159	1.14448223164961	no
LOC105199327	QH	21.3320780353814	-0.156919105199937	1.54693179210804	20.0518838821452	11.6307875097466	43QH	south_america	31.6826713918919	-0.737004750658928	-0.374991094254063	no
LOC105199327	QH	21.3320780353814	-0.156919105199937	1.54693179210804	6.82052056286069	11.6307875097467	112BQH	south_america	18.4513080726073	0.691608044722261	0.548522665479576	no
LOC105199327	QH	21.3320780353814	-0.156919105199937	1.54693179210804	7.51945645580446	6.82052056286069	114CQH	south_america	14.3399770186651	-0.123496747094188	0.0216055796876496	no
LOC105199327	QH	21.3320780353814	-0.156919105199937	1.54693179210804	18.1668614343502	16.6666936396095	118QH	south_america	34.8335550739596	-0.117582054011551	0.0254290792839554	no
LOC105199327	QH	21.3320780353814	-0.156919105199937	1.54693179210804	7.14286870268977	3.69487236321673	3QH	south_america	10.8377410659065	-0.794451203501393	-0.412126831676707	no
LOC105199327	QT	9.13240952154845	0.182227205719409	1.1287051691787	5.17418801320466	12.4424164498467	111BQT	south_america	17.6166044630514	1.12247118375397	0.83302885794235	no
LOC105199327	QT	9.13240952154845	0.182227205719409	1.1287051691787	3.50360899091039	0.969232292478887	114CQT	south_america	4.47284128338928	-1.19344827329665	-1.21880852199611	no
LOC105199327	QT	9.13240952154845	0.182227205719409	1.1287051691787	4.29081951857427	3.41065141220006	43QT	south_america	7.70147093077432	-0.262499460940295	-0.394014910894144	no
LOC105199327	QT	9.13240952154845	0.182227205719409	1.1287051691787	3.22461588062551	4.01037677642905	112BQT	south_america	7.23499265705455	0.246098925425222	0.0565884886947838	no
LOC105199327	QT	9.13240952154845	0.182227205719409	1.1287051691787	8.30770536410475	2.25564274821782	3QT	south_america	10.5633481123226	-1.51548314599435	-1.504122066659	no
LOC105199327	QT	9.13240952154845	0.182227205719409	1.1287051691787	8.17508764545757	3.53856774390798	118QT	south_america	11.7136553893656	-1.0154848478131	-1.06113809543729	no
LOC105199327	W	37.3854984888896	0.127073279071061	1.3566622902154	31.1431910303146	10.0259419410726	3BW	south_america	41.1691329713872	-1.5436112505359	-1.23146677080683	no
LOC105199327	W	37.3854984888896	0.127073279071061	1.3566622902154	27.7115427241255	20.1680998664182	114W	south_america	47.8796425905436	-0.439739078230466	-0.417799154136977	no
LOC105199327	W	37.3854984888896	0.127073279071061	1.3566622902154	19.4644943939466	14.1373696124454	112W	south_america	33.601864006392	-0.435008490128889	-0.414312222911944	no
LOC105199327	W	37.3854984888896	0.127073279071061	1.3566622902154	25.5877325214426	23.4008583003726	43CW	south_america	48.9885908218153	-0.123828849755781	-0.184940740696055	no
LOC105199327	W	37.3854984888896	0.127073279071061	1.3566622902154	17.4927396800566	9.9692464369257	28W	south_america	27.4619861169823	-0.753494555165427	-0.64906929350611	no
LOC105199327	W	37.3854984888896	0.127073279071061	1.3566622902154	14.6154012061301	6.68396129404841	104W	south_america	21.2993625001785	-1.02304748002962	-0.847757594056869	no
LOC105199329	QA	1.33370882034835	0.297259275323424	1.07755291546055	0.21627215993274	0.715136586429044	111BQA	south_america	0.931408746361784	0.49585738077521	0.184304735853186	no
LOC105199329	QA	1.33370882034835	0.297259275323424	1.07755291546055	0.692788568103137	0.715136586429044	43QA	south_america	1.40792515453218	0.0189216816216069	-0.258305267155122	no
LOC105199329	QA	1.33370882034835	0.297259275323424	1.07755291546055	1.25949248616452	0	118QA	south_america	1.25949248616452	-1.17599875940271	-1.36722569591533	no
LOC105199329	QA	1.33370882034835	0.297259275323424	1.07755291546055	0.757835618095632	1.00259419410726	3QA	south_america	1.76042981220289	0.188069938015988	-0.101330835581999	no
LOC105199329	QA	1.33370882034835	0.297259275323424	1.07755291546055	2.06094646524141	0	114CQA	south_america	2.06094646524141	-1.61397781291256	-1.77368281484266	no
LOC105199329	QA	1.33370882034835	0.297259275323424	1.07755291546055	0	0	112BQA	south_america	0	0	-0.27586513020233	no
LOC105199329	QH	4.81289899434407	-0.156919105199937	1.54693179210804	5.01297097053631	0	43QH	south_america	5.01297097053631	-2.58807799349749	-1.57160057133777	no
LOC105199329	QH	4.81289899434407	-0.156919105199937	1.54693179210804	14.2857374053795	12.9320532712586	3QH	south_america	27.2177906766381	-0.133778257128005	0.0149591909546297	no
LOC105199329	QH	4.81289899434407	-0.156919105199937	1.54693179210804	0	2.2735068542869	114CQH	south_america	2.2735068542869	1.71083699974066	1.20739396169198	no
LOC105199329	QH	4.81289899434407	-0.156919105199937	1.54693179210804	1.70513014071517	2.90769687743666	112BQH	south_america	4.61282701815184	0.530620558734159	0.444453768059916	no
LOC105199329	QH	4.81289899434407	-0.156919105199937	1.54693179210804	6.82052056286069	10.230780844291	111BQH	south_america	17.0513014071517	0.522121690738468	0.43895975207353	no
LOC105199329	QH	4.81289899434407	-0.156919105199937	1.54693179210804	1.29763295959644	1.19047811711496	118QH	south_america	2.4881110767114	-0.0689025477111262	0.0568975037799623	no
LOC105199329	QT	2.70511355084739	0.182227205719409	1.1287051691787	0	0.345622679162408	111BQT	south_america	0.345622679162408	0.42827392613332	0.217990248589848	no
LOC105199329	QT	2.70511355084739	0.182227205719409	1.1287051691787	1.66154107282095	2.25564274821782	3QT	south_america	3.91718382103877	0.29068056682428	0.0960865282328664	no
LOC105199329	QT	2.70511355084739	0.182227205719409	1.1287051691787	1.1678696636368	0.969232292478887	114CQT	south_america	2.13710195611568	-0.138644718854322	-0.284283206399429	no
LOC105199329	QT	2.70511355084739	0.182227205719409	1.1287051691787	0.715136586429044	2.55798855915004	43QT	south_america	3.27312514557909	1.05273840029374	0.771247636978358	no
LOC105199329	QT	2.70511355084739	0.182227205719409	1.1287051691787	1.1678696636368	0	118QT	south_america	1.1678696636368	-1.1162780217853	-1.15043792033802	no
LOC105199329	QT	2.70511355084739	0.182227205719409	1.1287051691787	2.01538492539094	3.00778258232178	112BQT	south_america	5.02316750771273	0.410462066671857	0.202209458399595	no
LOC105199329	W	2.24440825890914	0.127073279071061	1.3566622902154	0	2.50648548526815	3BW	south_america	2.50648548526815	1.81002575613728	1.24050951309262	no
LOC105199329	W	2.24440825890914	0.127073279071061	1.3566622902154	0	1.22933648803873	112W	south_america	1.22933648803873	1.15661438823829	0.758877958496043	no
LOC105199329	W	2.24440825890914	0.127073279071061	1.3566622902154	3.87692916991555	2.46324824214449	43CW	south_america	6.34017741206004	-0.493847217375018	-0.457682432042462	no
LOC105199329	W	2.24440825890914	0.127073279071061	1.3566622902154	0.874636984002829	1.1076940485473	28W	south_america	1.98233103255013	0.169054211032909	0.0309442757159434	no
LOC105199329	W	2.24440825890914	0.127073279071061	1.3566622902154	0.97436008040867	0	104W	south_america	0.97436008040867	-0.981385130040271	-0.817048146105206	no
LOC105199329	W	2.24440825890914	0.127073279071061	1.3566622902154	1.84743618160836	2.52101248330227	114W	south_america	4.36844866491063	0.306326834324526	0.132128353936193	no
LOC105199338	QA	24.0232075235862	0.297259275323424	1.07755291546055	0	0	112BQA	south_america	0	0	-0.27586513020233	no
LOC105199338	QA	24.0232075235862	0.297259275323424	1.07755291546055	26.1053218930578	42.8572122161386	114CQA	south_america	68.9625341091964	0.694237970057207	0.368407610464414	no
LOC105199338	QA	24.0232075235862	0.297259275323424	1.07755291546055	3.78917809047816	10.0259419410726	3QA	south_america	13.8151200315508	1.20305192003899	0.840601544220616	no
LOC105199338	QA	24.0232075235862	0.297259275323424	1.07755291546055	8.81644740315162	12.5464337628871	118QA	south_america	21.3628811660387	0.464640188185984	0.155334286104196	no
LOC105199338	QA	24.0232075235862	0.297259275323424	1.07755291546055	15.241348498269	11.4421853828647	43QA	south_america	26.6835338811337	-0.384431515587777	-0.632628598679859	no
LOC105199338	QA	24.0232075235862	0.297259275323424	1.07755291546055	13.4088739158299	13.9451634353664	111BQA	south_america	27.3540373511962	0.0527210837086843	-0.22693845295776	no
LOC105199338	QH	14.1808367226839	-0.156919105199937	1.54693179210804	10.3810636767715	7.14286870268977	118QH	south_america	17.5239323794613	-0.483026353239378	-0.210809067150303	no
LOC105199338	QH	14.1808367226839	-0.156919105199937	1.54693179210804	10.0259419410726	8.72309063230999	43QH	south_america	18.7490325733826	-0.18141503539692	-0.0158351714807036	no
LOC105199338	QH	14.1808367226839	-0.156919105199937	1.54693179210804	5.11539042214552	0	112BQH	south_america	5.11539042214552	-2.61244460702949	-1.5873521472355	no
LOC105199338	QH	14.1808367226839	-0.156919105199937	1.54693179210804	12.5324274263408	6.82052056286069	114CQH	south_america	19.3529479892015	-0.791084104004221	-0.409950200803678	no
LOC105199338	QH	14.1808367226839	-0.156919105199937	1.54693179210804	7.14286870268977	3.69487236321673	3QH	south_america	10.8377410659065	-0.794451203501393	-0.412126831676707	no
LOC105199338	QH	14.1808367226839	-0.156919105199937	1.54693179210804	2.72820822514428	3.41026028143035	111BQH	south_america	6.13846850657462	0.242381363603244	0.258124159604377	no
LOC105199338	QT	12.7771835785793	0.182227205719409	1.1287051691787	4.67147865454718	3.87692916991555	114CQT	south_america	8.54840782446274	-0.217751900715893	-0.354369872095426	no
LOC105199338	QT	12.7771835785793	0.182227205719409	1.1287051691787	9.34295730909437	10.0259419410726	118QT	south_america	19.368899250167	0.0922531627313379	-0.0797143890583409	no
LOC105199338	QT	12.7771835785793	0.182227205719409	1.1287051691787	7.86650245071949	15.3479313549003	43QT	south_america	23.2144338056197	0.882671065408926	0.620572917371499	no
LOC105199338	QT	12.7771835785793	0.182227205719409	1.1287051691787	5.24000080601645	2.00518838821452	112BQT	south_america	7.24518919423097	-1.05409078249836	-1.09534183237362	no
LOC105199338	QT	12.7771835785793	0.182227205719409	1.1287051691787	2.49231160923143	13.5338564893069	3QT	south_america	16.0261680985384	2.05716336851654	1.66113898828108	no
LOC105199338	QT	12.7771835785793	0.182227205719409	1.1287051691787	3.99823619202178	5.52996286659853	111BQT	south_america	9.52819905862031	0.385655710043513	0.1802317468539	no
LOC105199338	W	18.5762834410727	0.127073279071061	1.3566622902154	7.43441436402404	8.8615523883784	28W	south_america	16.2959667524024	0.225526871260018	0.0725704494766536	no
LOC105199338	W	18.5762834410727	0.127073279071061	1.3566622902154	9.23718090804182	7.56303744990681	114W	south_america	16.8002183579486	-0.257623943770031	-0.283561521253763	no
LOC105199338	W	18.5762834410727	0.127073279071061	1.3566622902154	11.6307875097466	14.7794894528669	43CW	south_america	26.4102769626136	0.321105935850591	0.14302207570664	no
LOC105199338	W	18.5762834410727	0.127073279071061	1.3566622902154	10.7179608844954	15.0389129116089	104W	south_america	25.7568737961043	0.452854822623097	0.240134590532706	no
LOC105199338	W	18.5762834410727	0.127073279071061	1.3566622902154	7.78579775757864	2.50648548526815	3BW	south_america	10.2922832428468	-1.32514753392662	-1.07043648479911	no
LOC105199338	W	18.5762834410727	0.127073279071061	1.3566622902154	12.9763295959644	7.3760189282324	112W	south_america	20.3523485241968	-0.738648928433431	-0.63812653579915	no
LOC105199342	QA	14.1100538664559	0.297259275323424	1.07755291546055	11.7774056577533	5.00595610500331	43QA	south_america	16.7833617627566	-1.08912910321043	-1.28660816433438	no
LOC105199342	QA	14.1100538664559	0.297259275323424	1.07755291546055	3.89289887878932	5.36352439821783	111BQA	south_america	9.25642327700715	0.379136547493501	0.0759844560720088	no
LOC105199342	QA	14.1100538664559	0.297259275323424	1.07755291546055	5.49585724064375	9.52382493691969	114CQA	south_america	15.0196821775634	0.696067322789473	0.370105302249215	no
LOC105199342	QA	14.1100538664559	0.297259275323424	1.07755291546055	11.3675342714345	13.0337245233944	3QA	south_america	24.4012587948289	0.18234005092792	-0.106648335080962	no
LOC105199342	QA	14.1100538664559	0.297259275323424	1.07755291546055	6.92720867390485	6.27321688144353	118QA	south_america	13.2004255553484	-0.124219357106314	-0.391144255082451	no
LOC105199342	QA	14.1100538664559	0.297259275323424	1.07755291546055	0	0	112BQA	south_america	0	0	-0.27586513020233	no
LOC105199342	QH	10.0956193961676	-0.156919105199937	1.54693179210804	5.45641645028855	1.70513014071517	111BQH	south_america	7.16154659100373	-1.25503563587161	-0.709867452640071	no
LOC105199342	QH	10.0956193961676	-0.156919105199937	1.54693179210804	10.3810636767715	7.14286870268977	118QH	south_america	17.5239323794613	-0.483026353239378	-0.210809067150303	no
LOC105199342	QH	10.0956193961676	-0.156919105199937	1.54693179210804	10.7143030540346	0	3QH	south_america	10.7143030540346	-3.55019921806852	-2.19355509414186	no
LOC105199342	QH	10.0956193961676	-0.156919105199937	1.54693179210804	5.01297097053631	9.09402741714759	114CQH	south_america	14.1069983876839	0.747352011756753	0.584557846422188	no
LOC105199342	QH	10.0956193961676	-0.156919105199937	1.54693179210804	5.11539042214552	4.36154531615499	112BQH	south_america	9.47693573830051	-0.189795729734799	-0.0212527951798444	no
LOC105199342	QH	10.0956193961676	-0.156919105199937	1.54693179210804	5.01297097053631	2.90769687743666	43QH	south_america	7.92066784797297	-0.621759432634339	-0.300491805654181	no
LOC105199342	QT	5.50015503315353	0.182227205719409	1.1287051691787	4.29081951857427	0.852662853050014	43QT	south_america	5.14348237162428	-1.51389084099876	-1.50271133067668	no
LOC105199342	QT	5.50015503315353	0.182227205719409	1.1287051691787	4.08754382272879	1.76928387195399	118QT	south_america	5.85682769468278	-0.877456368285838	-0.93884887120374	no
LOC105199342	QT	5.50015503315353	0.182227205719409	1.1287051691787	5.81539375487333	5.63910687054455	3QT	south_america	11.4545006254179	-0.0378078348997041	-0.19494465572371	no
LOC105199342	QT	5.50015503315353	0.182227205719409	1.1287051691787	4.03076985078189	2.00518838821452	112BQT	south_america	6.03595823899641	-0.743323757332211	-0.820011273382487	no
LOC105199342	QT	5.50015503315353	0.182227205719409	1.1287051691787	0	2.90769687743666	114CQT	south_america	2.90769687743666	1.96631856086315	1.58065312701805	no
LOC105199342	QT	5.50015503315353	0.182227205719409	1.1287051691787	0.940761456946302	1.38249071664963	111BQT	south_america	2.32325217359593	0.295847788419336	0.100664536499468	no
LOC105199342	W	15.5176692353945	0.127073279071061	1.3566622902154	8.31346281723764	8.82354369155795	114W	south_america	17.1370065087956	0.0769258757083118	-0.0369638072233784	no
LOC105199342	W	15.5176692353945	0.127073279071061	1.3566622902154	9.30463000779732	13.5478653317947	43CW	south_america	22.852495339592	0.497514770860311	0.273053577490118	no
LOC105199342	W	15.5176692353945	0.127073279071061	1.3566622902154	0	0	3BW	south_america	0	0	-0.093666109825228	no
LOC105199342	W	15.5176692353945	0.127073279071061	1.3566622902154	3.93586642801273	14.4000226311149	28W	south_america	18.3358890591276	1.64155721241004	1.11633082474676	no
LOC105199342	W	15.5176692353945	0.127073279071061	1.3566622902154	7.13698127778042	6.76135068421303	112W	south_america	13.8983319619935	-0.0681859291497934	-0.143926170594638	no
LOC105199342	W	15.5176692353945	0.127073279071061	1.3566622902154	1.94872016081734	2.50648548526815	104W	south_america	4.45520564608549	0.249936841759833	0.0905631147669519	no
LOC105199343	QA	28.1227460160664	0.297259275323424	1.07755291546055	12.1253698895301	18.0466954939307	3QA	south_america	30.1720653834608	0.537182638757324	0.222655760094489	no
LOC105199343	QA	28.1227460160664	0.297259275323424	1.07755291546055	11.9651786185629	14.1147379832479	118QA	south_america	26.0799166018109	0.221313887762611	-0.0704794970819179	no
LOC105199343	QA	28.1227460160664	0.297259275323424	1.07755291546055	15.1136074117703	22.6190842251843	114CQA	south_america	37.7326916369546	0.551673517111464	0.236103710674202	no
LOC105199343	QA	28.1227460160664	0.297259275323424	1.07755291546055	9.00625138534078	12.1573219692938	43QA	south_america	21.1635733546345	0.394964271488595	0.0906730377351465	no
LOC105199343	QA	28.1227460160664	0.297259275323424	1.07755291546055	16.2204119949555	13.9451634353664	111BQA	south_america	30.1655754303219	-0.204440985403267	-0.465592226171338	no
LOC105199343	QA	28.1227460160664	0.297259275323424	1.07755291546055	0	0	112BQA	south_america	0	0	-0.27586513020233	no
LOC105199343	QH	10.4486701076168	-0.156919105199937	1.54693179210804	7.14286870268977	3.69487236321673	3QH	south_america	10.8377410659065	-0.794451203501393	-0.412126831676707	no
LOC105199343	QH	10.4486701076168	-0.156919105199937	1.54693179210804	10.0259419410726	4.54701370857379	114CQH	south_america	14.5729556496464	-0.99111871383679	-0.539260756610394	no
LOC105199343	QH	10.4486701076168	-0.156919105199937	1.54693179210804	5.11539042214552	2.90769687743666	112BQH	south_america	8.02308729958218	-0.646126046166341	-0.316243381551911	no
LOC105199343	QH	10.4486701076168	-0.156919105199937	1.54693179210804	5.01297097053631	14.5384843871833	43QH	south_america	19.5514553577196	1.36969589254031	0.986866392900164	no
LOC105199343	QH	10.4486701076168	-0.156919105199937	1.54693179210804	1.36410411257214	3.41026028143035	111BQH	south_america	4.77436439400248	0.899570230554287	0.682957930753057	no
LOC105199343	QH	10.4486701076168	-0.156919105199937	1.54693179210804	6.4881647979822	3.57143435134488	118QH	south_america	10.0595991493271	-0.711965283782415	-0.358804558426009	no
LOC105199343	QT	15.4045000688647	0.182227205719409	1.1287051691787	8.17508764545757	1.93846458495777	114CQT	south_america	10.1135522304153	-1.64265942869081	-1.61679655967031	no
LOC105199343	QT	15.4045000688647	0.182227205719409	1.1287051691787	3.57568293214522	1.70532570610003	43QT	south_america	5.28100863824525	-0.758184788386645	-0.833177715302168	no
LOC105199343	QT	15.4045000688647	0.182227205719409	1.1287051691787	6.42328315000238	7.66689677846729	118QT	south_america	14.0901799284697	0.223458123099162	0.0365293953688141	no
LOC105199343	QT	15.4045000688647	0.182227205719409	1.1287051691787	10.0769246269547	11.0285361351799	112BQT	south_america	21.1054607621346	0.118903687878062	-0.0561027977637636	no
LOC105199343	QT	15.4045000688647	0.182227205719409	1.1287051691787	6.35013983438754	10.3686803748722	111BQT	south_america	16.7188202092598	0.629221200218075	0.396023697511655	no
LOC105199343	QT	15.4045000688647	0.182227205719409	1.1287051691787	16.6154107282095	16.9173206116337	3QT	south_america	33.5327313398432	0.0245167966127795	-0.13972684223763	no
LOC105199343	W	22.8587899270083	0.127073279071061	1.3566622902154	9.7436008040867	22.5583693674134	104W	south_america	32.3019701715001	1.13276207883455	0.741296346936728	no
LOC105199343	W	22.8587899270083	0.127073279071061	1.3566622902154	6.20308667186488	17.2427376950114	43CW	south_america	23.4458243668763	1.34063508269736	0.894520185589905	no
LOC105199343	W	22.8587899270083	0.127073279071061	1.3566622902154	11.678696636368	5.01297097053631	3BW	south_america	16.6916676069043	-1.0762565461657	-0.88697816244727	no
LOC105199343	W	22.8587899270083	0.127073279071061	1.3566622902154	12.0083351804544	16.3865811414648	114W	south_america	28.3949163219191	0.418537935860027	0.2148395064056	no
LOC105199343	W	22.8587899270083	0.127073279071061	1.3566622902154	7.87173285602546	14.4000226311149	28W	south_america	22.2717554871404	0.795644641934544	0.492806034106937	no
LOC105199343	W	22.8587899270083	0.127073279071061	1.3566622902154	10.3810636767715	7.3760189282324	112W	south_america	17.7570826050039	-0.442298790943444	-0.41968592635099	no
LOC105199346	QA	0.738470339141789	0.297259275323424	1.07755291546055	0	0	112BQA	south_america	0	0	-0.27586513020233	no
LOC105199346	QA	0.738470339141789	0.297259275323424	1.07755291546055	0.686982155080468	2.38095623422992	114CQA	south_america	3.06793838931039	1.00298662810815	0.654935217249257	no
LOC105199346	QA	0.738470339141789	0.297259275323424	1.07755291546055	0	1.00259419410726	3QA	south_america	1.00259419410726	1.00187010289637	0.653899049840907	no
LOC105199346	QA	0.738470339141789	0.297259275323424	1.07755291546055	0	0.784152110180441	118QA	south_america	0.784152110180441	0.83523861932102	0.499260255602077	no
LOC105199346	QA	0.738470339141789	0.297259275323424	1.07755291546055	0.21627215993274	0.357568293214522	111BQA	south_america	0.573840453147262	0.15855868491541	-0.128718124574638	no
LOC105199346	QA	0.738470339141789	0.297259275323424	1.07755291546055	0.692788568103137	0	43QA	south_america	0.692788568103137	-0.75940178965543	-0.980611763764044	no
LOC105199346	QH	2.50648548526815	-0.156919105199937	1.54693179210804	2.59526591919288	3.57143435134488	118QH	south_america	6.16670027053777	0.346548420338951	0.325462006862502	no
LOC105199346	QH	2.50648548526815	-0.156919105199937	1.54693179210804	3.57143435134488	1.84743618160836	3QH	south_america	5.41887053295325	-0.682983394244875	-0.340069479293627	no
LOC105199346	QH	2.50648548526815	-0.156919105199937	1.54693179210804	2.50648548526815	0	43QH	south_america	2.50648548526815	-1.81002575613728	-1.06863577267658	no
LOC105199346	QH	2.50648548526815	-0.156919105199937	1.54693179210804	2.50648548526815	0	114CQH	south_america	2.50648548526815	-1.81002575613728	-1.06863577267658	no
LOC105199346	QH	2.50648548526815	-0.156919105199937	1.54693179210804	0	1.70513014071517	111BQH	south_america	1.70513014071517	1.43569800212899	1.02953285688093	no
LOC105199346	QH	2.50648548526815	-0.156919105199937	1.54693179210804	0	1.45384843871833	112BQH	south_america	1.45384843871833	1.2950461440856	0.938609741355765	no
LOC105199346	QT	1.33206763346411	0.182227205719409	1.1287051691787	0	0.969232292478887	114CQT	south_america	0.969232292478887	0.97763330293098	0.704706701919641	no
LOC105199346	QT	1.33206763346411	0.182227205719409	1.1287051691787	0.235190364236576	0	111BQT	south_america	0.235190364236576	-0.304733403247833	-0.431432957219092	no
LOC105199346	QT	1.33206763346411	0.182227205719409	1.1287051691787	1.43027317285809	0.852662853050014	43QT	south_america	2.2829360259081	-0.391518123793206	-0.50832169921761	no
LOC105199346	QT	1.33206763346411	0.182227205719409	1.1287051691787	0	1.00259419410726	112BQT	south_america	1.00259419410726	1.00187010289637	0.726179802803046	no
LOC105199346	QT	1.33206763346411	0.182227205719409	1.1287051691787	1.66154107282095	0	3QT	south_america	1.66154107282095	-1.41226183006121	-1.41267097849906	no
LOC105199346	QT	1.33206763346411	0.182227205719409	1.1287051691787	2.33573932727359	1.76928387195399	118QT	south_america	4.10502319922758	-0.268493605055921	-0.399325548498459	no
LOC105199346	W	2.03523578366612	0.127073279071061	1.3566622902154	3.10154333593244	2.46324824214449	43CW	south_america	5.56479157807693	-0.244041069546718	-0.273549542354315	no
LOC105199346	W	2.03523578366612	0.127073279071061	1.3566622902154	1.29763295959644	0.614668244019367	112W	south_america	1.91230120361581	-0.508910576249195	-0.468785680789639	no
LOC105199346	W	2.03523578366612	0.127073279071061	1.3566622902154	0.437318492001414	1.1076940485473	28W	south_america	1.54501254054871	0.552285680932443	0.313425385910794	no
LOC105199346	W	2.03523578366612	0.127073279071061	1.3566622902154	0.487180040204335	1.6709903235121	104W	south_america	2.15817036371644	0.844795436625832	0.529035237974234	no
LOC105199346	W	2.03523578366612	0.127073279071061	1.3566622902154	0.923718090804182	0	114W	south_america	0.923718090804182	-0.943897396406448	-0.789415820872763	no
LOC105199346	W	2.03523578366612	0.127073279071061	1.3566622902154	11.678696636368	2.50648548526815	3BW	south_america	14.1851821216361	-1.85430878352591	-1.46048289016892	no
LOC105199351	QA	14.6257917119382	0.297259275323424	1.07755291546055	7.5569549169871	7.05736899162397	118QA	south_america	14.6143239086111	-0.0867886635977023	-0.356407498333374	no
LOC105199351	QA	14.6257917119382	0.297259275323424	1.07755291546055	0	0	112BQA	south_america	0	0	-0.27586513020233	no
LOC105199351	QA	14.6257917119382	0.297259275323424	1.07755291546055	6.82052056286069	8.02075355285809	3QA	south_america	14.8412741157188	0.205983312855387	-0.0847067101377813	no
LOC105199351	QA	14.6257917119382	0.297259275323424	1.07755291546055	9.61775017112656	16.6666936396095	114CQA	south_america	26.284443810736	0.734553960335347	0.405822005339778	no
LOC105199351	QA	14.6257917119382	0.297259275323424	1.07755291546055	6.05562047811672	8.58163903714853	111BQA	south_america	14.6372595152653	0.441499504378264	0.133859068065526	no
LOC105199351	QA	14.6257917119382	0.297259275323424	1.07755291546055	6.92788568103137	7.15136586429044	43QA	south_america	14.0792515453218	0.0401056621527789	-0.238645925857607	no
LOC105199351	QH	13.975795702309	-0.156919105199937	1.54693179210804	10.0259419410726	6.82052056286069	114CQH	south_america	16.8464625039333	-0.495565362836032	-0.218914795961763	no
LOC105199351	QH	13.975795702309	-0.156919105199937	1.54693179210804	10.3810636767715	4.76191246845985	118QH	south_america	15.1429761452314	-0.982015749335127	-0.533376227927162	no
LOC105199351	QH	13.975795702309	-0.156919105199937	1.54693179210804	5.01297097053631	5.81539375487332	43QH	south_america	10.8283647254096	0.18071901669409	0.218263095772258	no
LOC105199351	QH	13.975795702309	-0.156919105199937	1.54693179210804	3.57143435134488	9.23718090804182	3QH	south_america	12.8086152593867	1.16309967676447	0.8533141465569	no
LOC105199351	QH	13.975795702309	-0.156919105199937	1.54693179210804	10.230780844291	5.81539375487333	112BQH	south_america	16.0461745991644	-0.720589322409683	-0.364379489829749	no
LOC105199351	QH	13.975795702309	-0.156919105199937	1.54693179210804	5.45641645028855	3.41026028143035	111BQH	south_america	8.8666767317189	-0.54986983581239	-0.254019429051213	no
LOC105199351	QT	9.21111478112273	0.182227205719409	1.1287051691787	4.67147865454718	3.87692916991555	114CQT	south_america	8.54840782446274	-0.217751900715893	-0.354369872095426	no
LOC105199351	QT	9.21111478112273	0.182227205719409	1.1287051691787	4.29081951857427	3.41065141220006	43QT	south_america	7.70147093077432	-0.262499460940295	-0.394014910894144	no
LOC105199351	QT	9.21111478112273	0.182227205719409	1.1287051691787	3.99823619202178	5.87558554576094	111BQT	south_america	9.87382173778272	0.460063505354364	0.246154892545697	no
LOC105199351	QT	9.21111478112273	0.182227205719409	1.1287051691787	2.49231160923143	4.51128549643564	3QT	south_america	7.00359710566707	0.658206571442251	0.421703894622179	no
LOC105199351	QT	9.21111478112273	0.182227205719409	1.1287051691787	5.64307779109464	6.01556516464357	112BQT	south_america	11.6586429557382	0.0787075215131987	-0.0917154337846583	no
LOC105199351	QT	9.21111478112273	0.182227205719409	1.1287051691787	5.83934831818398	4.12832903455931	118QT	south_america	9.96767735274329	-0.415370037108202	-0.529453801706652	no
LOC105199351	W	13.4553216760256	0.127073279071061	1.3566622902154	6.20308667186488	7.38974472643346	43CW	south_america	13.5928313982983	0.220011650889487	0.0685051633621147	no
LOC105199351	W	13.4553216760256	0.127073279071061	1.3566622902154	4.87180040204335	8.35495161756051	104W	south_america	13.2267520196039	0.671927264066486	0.401613569511775	no
LOC105199351	W	13.4553216760256	0.127073279071061	1.3566622902154	6.1224588880198	6.6461642912838	28W	south_america	12.7686231793036	0.102360810240244	-0.0182156377523348	no
LOC105199351	W	13.4553216760256	0.127073279071061	1.3566622902154	7.78579775757864	5.5320141961743	112W	south_america	13.3178119537529	-0.427645363719092	-0.4088848394998	no
LOC105199351	W	13.4553216760256	0.127073279071061	1.3566622902154	15.5715955151573	0	3BW	south_america	15.5715955151573	-4.05064060698147	-3.07940591861608	no
LOC105199351	W	13.4553216760256	0.127073279071061	1.3566622902154	7.38974472643346	6.30253120825568	114W	south_america	13.6922759346891	-0.200230296056171	-0.241256484747774	no
LOC105199355	QA	1.52664780491926	0.297259275323424	1.07755291546055	0	1.19047811711496	114CQA	south_america	1.19047811711496	1.1312458022037	0.773963408120731	no
LOC105199355	QA	1.52664780491926	0.297259275323424	1.07755291546055	0	0.715136586429044	43QA	south_america	0.715136586429044	0.778323471277037	0.446441366406592	no
LOC105199355	QA	1.52664780491926	0.297259275323424	1.07755291546055	0.43254431986548	1.43027317285809	111BQA	south_america	1.86281749272357	0.762538714316023	0.431792659382985	no
LOC105199355	QA	1.52664780491926	0.297259275323424	1.07755291546055	0	2.00518838821452	3QA	south_america	2.00518838821452	1.58745543294107	1.19733902540295	no
LOC105199355	QA	1.52664780491926	0.297259275323424	1.07755291546055	0	0	112BQA	south_america	0	0	-0.27586513020233	no
LOC105199355	QA	1.52664780491926	0.297259275323424	1.07755291546055	0.629746243082259	1.56830422036088	118QA	south_america	2.19805046344314	0.656168752944507	0.333078285503673	no
LOC105199355	QH	2.1359004950044	-0.156919105199937	1.54693179210804	1.36410411257214	0	111BQH	south_america	1.36410411257214	-1.24129357163393	-0.700984020088105	no
LOC105199355	QH	2.1359004950044	-0.156919105199937	1.54693179210804	0	2.90769687743666	43QH	south_america	2.90769687743666	1.96631856086315	1.37254769531222	no
LOC105199355	QH	2.1359004950044	-0.156919105199937	1.54693179210804	0	0	114CQH	south_america	0	0	0.10143892962863	no
LOC105199355	QH	2.1359004950044	-0.156919105199937	1.54693179210804	2.59526591919288	1.19047811711496	118QH	south_america	3.78574403630784	-0.714852679479724	-0.360671089136696	no
LOC105199355	QH	2.1359004950044	-0.156919105199937	1.54693179210804	0	0	112BQH	south_america	0	0	0.10143892962863	no
LOC105199355	QH	2.1359004950044	-0.156919105199937	1.54693179210804	7.14286870268977	0	3QH	south_america	7.14286870268977	-3.02553714019678	-1.85439206151922	no
LOC105199355	QT	1.04715269309909	0.182227205719409	1.1287051691787	1.66154107282095	2.25564274821782	3QT	south_america	3.91718382103877	0.29068056682428	0.0960865282328664	no
LOC105199355	QT	1.04715269309909	0.182227205719409	1.1287051691787	0.583934831818398	1.17952258130266	118QT	south_america	1.76345741312106	0.460499171531959	0.246540880126414	no
LOC105199355	QT	1.04715269309909	0.182227205719409	1.1287051691787	0.235190364236576	0.691245358324816	111BQT	south_america	0.926435722561392	0.453352571438262	0.240209199995192	no
LOC105199355	QT	1.04715269309909	0.182227205719409	1.1287051691787	0	0	43QT	south_america	0	0	-0.161448012018946	no
LOC105199355	QT	1.04715269309909	0.182227205719409	1.1287051691787	0.403076985078189	0.501297097053631	112BQT	south_america	0.904374082131819	0.0976153352938308	-0.0749636598963625	no
LOC105199355	QT	1.04715269309909	0.182227205719409	1.1287051691787	1.1678696636368	0	114CQT	south_america	1.1678696636368	-1.1162780217853	-1.15043792033802	no
LOC105199355	W	1.6191696252206	0.127073279071061	1.3566622902154	0.874636984002829	0.55384702427365	28W	south_america	1.42848400827648	-0.270766772610698	-0.29324914133096	no
LOC105199355	W	1.6191696252206	0.127073279071061	1.3566622902154	0	1.26050624165114	114W	south_america	1.26050624165114	1.17664590119448	0.77364324909243	no
LOC105199355	W	1.6191696252206	0.127073279071061	1.3566622902154	1.29763295959644	0	112W	south_america	1.29763295959644	-1.20014834991483	-0.97829919690269	no
LOC105199355	W	1.6191696252206	0.127073279071061	1.3566622902154	3.89289887878932	0	3BW	south_america	3.89289887878932	-2.29068946699808	-1.78214045124323	no
LOC105199355	W	1.6191696252206	0.127073279071061	1.3566622902154	0.97436008040867	0.835495161756051	104W	south_america	1.80985524216472	-0.105215818446587	-0.171221017340113	no
LOC105199355	W	1.6191696252206	0.127073279071061	1.3566622902154	0	2.46324824214449	43CW	south_america	2.46324824214449	1.79212580216841	1.2273154012654	no
LOC105199531	QA	178.305080921525	0.297259275323424	1.07755291546055	1.25949248616452	72.1419941366006	118QA	south_america	73.4014866227651	5.01662929620503	4.37971068814244	sa
LOC105199531	QA	178.305080921525	0.297259275323424	1.07755291546055	3.02781023905836	234.207232055512	111BQA	south_america	237.23504229457	5.86779289431291	5.16961491084514	sa
LOC105199531	QA	178.305080921525	0.297259275323424	1.07755291546055	0	205.952714260888	114CQA	south_america	205.952714260888	7.69315735994256	6.8636054698605	sa
LOC105199531	QA	178.305080921525	0.297259275323424	1.07755291546055	1.50664698305925	212.526208132643	112BQA	south_america	214.032855115703	6.41251051400667	5.67512847948593	sa
LOC105199531	QA	178.305080921525	0.297259275323424	1.07755291546055	0.692788568103137	93.6828928222048	43QA	south_america	94.3756813903079	5.80563009027038	5.11192604642778	sa
LOC105199531	QA	178.305080921525	0.297259275323424	1.07755291546055	2.2735068542869	148.383940727875	3QA	south_america	150.657447582162	5.51204425196601	4.83946997110002	sa
LOC105199531	QH	394.213497800322	-0.156919105199937	1.54693179210804	1.29763295959644	217.857495432038	118QH	south_america	219.155128391634	6.57369963410625	4.35094732272211	sa
LOC105199531	QH	394.213497800322	-0.156919105199937	1.54693179210804	10.0259419410726	388.769672083059	114CQH	south_america	398.795614024132	5.14364802416434	3.42650345439024	sa
LOC105199531	QH	394.213497800322	-0.156919105199937	1.54693179210804	5.45641645028855	520.064692918128	111BQH	south_america	525.521109368416	6.33458505356406	4.19637387497084	sa
LOC105199531	QH	394.213497800322	-0.156919105199937	1.54693179210804	10.230780844291	1035.14008836745	112BQH	south_america	1045.37086921174	6.52761702374349	4.32115763800695	sa
LOC105199531	QH	394.213497800322	-0.156919105199937	1.54693179210804	10.7143030540346	258.641065425171	3QH	south_america	269.355368479206	4.47017555303959	2.99114329529299	sa
LOC105199531	QH	394.213497800322	-0.156919105199937	1.54693179210804	0	389.631381576513	43QH	south_america	389.631381576513	8.60966404331639	5.66707801419603	sa
LOC105199531	QT	210.677794483426	0.182227205719409	1.1287051691787	5.64307779109464	764.478073006787	112BQT	south_america	770.121150797881	6.8483654337136	5.90600487179908	sa
LOC105199531	QT	210.677794483426	0.182227205719409	1.1287051691787	1.1678696636368	111.461713635072	114CQT	south_america	112.629583298709	5.69701210321023	4.88593925861406	sa
LOC105199531	QT	210.677794483426	0.182227205719409	1.1287051691787	0.715136586429044	111.698833749552	43QT	south_america	112.413970335981	6.0380053045274	5.1880493318454	sa
LOC105199531	QT	210.677794483426	0.182227205719409	1.1287051691787	0.830770536410475	307.895235131733	3QT	south_america	308.726005668143	7.39852282743777	6.39342834494973	sa
LOC105199531	QT	210.677794483426	0.182227205719409	1.1287051691787	4.46861692049493	466.936239548413	111BQT	south_america	471.404856468908	6.41899214892718	5.52559261135125	sa
LOC105199531	QT	210.677794483426	0.182227205719409	1.1287051691787	2.33573932727359	97.3106129574695	118QT	south_america	99.646352284743	4.88126871039774	4.16321430342841	sa
LOC105199531	W	742.987868751162	0.127073279071061	1.3566622902154	6.4881647979822	674.905731933265	112W	south_america	681.393896731247	6.49606605290954	4.69460441244172	sa
LOC105199531	W	742.987868751162	0.127073279071061	1.3566622902154	0	804.581840771077	3BW	south_america	804.581840771077	9.65388735260702	7.02224432878089	sa
LOC105199531	W	742.987868751162	0.127073279071061	1.3566622902154	8.74636984002829	291.877381792214	28W	south_america	300.623751632242	4.90928800275698	3.52498536900193	sa
LOC105199531	W	742.987868751162	0.127073279071061	1.3566622902154	285.974683599945	1134.60242966472	104W	south_america	1420.57711326466	1.98446246526223	1.36908735474344	sa
LOC105199531	W	742.987868751162	0.127073279071061	1.3566622902154	2.32615750194933	814.103544028753	43CW	south_america	816.429701530702	7.9369830433414	5.75670881441716	sa
LOC105199531	W	742.987868751162	0.127073279071061	1.3566622902154	5.54230854482509	644.11868948373	114W	south_america	649.660998028555	6.62362100235775	4.7886255630023	sa
LOC105199580	QA	0.132168039883485	0.297259275323424	1.07755291546055	0	0.264336079766969	112BQA	south_america	0.264336079766969	0.338380004785408	0.0381612159105972	no
LOC105199580	QA	0.132168039883485	0.297259275323424	1.07755291546055	0.629746243082259	0	118QA	south_america	0.629746243082259	-0.70464734951994	-0.929798073457162	no
LOC105199580	QA	0.132168039883485	0.297259275323424	1.07755291546055	0	0	43QA	south_america	0	0	-0.27586513020233	no
LOC105199580	QA	0.132168039883485	0.297259275323424	1.07755291546055	0	0	3QA	south_america	0	0	-0.27586513020233	no
LOC105199580	QA	0.132168039883485	0.297259275323424	1.07755291546055	0.43254431986548	0.715136586429044	111BQA	south_america	1.14768090629452	0.259743697697268	-0.0348155316438656	no
LOC105199580	QA	0.132168039883485	0.297259275323424	1.07755291546055	0	0	114CQA	south_america	0	0	-0.27586513020233	no
LOC105199580	QH	1.32216327791665	-0.156919105199937	1.54693179210804	0	1.70513014071517	111BQH	south_america	1.70513014071517	1.43569800212899	1.02953285688093	no
LOC105199580	QH	1.32216327791665	-0.156919105199937	1.54693179210804	0	1.19047811711496	118QH	south_america	1.19047811711496	1.1312458022037	0.832722498804053	no
LOC105199580	QH	1.32216327791665	-0.156919105199937	1.54693179210804	0	0	3QH	south_america	0	0	0.10143892962863	no
LOC105199580	QH	1.32216327791665	-0.156919105199937	1.54693179210804	0	0	43QH	south_america	0	0	0.10143892962863	no
LOC105199580	QH	1.32216327791665	-0.156919105199937	1.54693179210804	0	1.45384843871833	112BQH	south_america	1.45384843871833	1.2950461440856	0.938609741355765	no
LOC105199580	QH	1.32216327791665	-0.156919105199937	1.54693179210804	5.01297097053631	0	114CQH	south_america	5.01297097053631	-2.58807799349749	-1.57160057133777	no
LOC105199580	QT	0.319133674657382	0.182227205719409	1.1287051691787	1.1678696636368	0	118QT	south_america	1.1678696636368	-1.1162780217853	-1.15043792033802	no
LOC105199580	QT	0.319133674657382	0.182227205719409	1.1287051691787	0	0	43QT	south_america	0	0	-0.161448012018946	no
LOC105199580	QT	0.319133674657382	0.182227205719409	1.1287051691787	0.830770536410475	0	3QT	south_america	0.830770536410475	-0.872450979159287	-0.93441424180429	no
LOC105199580	QT	0.319133674657382	0.182227205719409	1.1287051691787	0	0	114CQT	south_america	0	0	-0.161448012018946	no
LOC105199580	QT	0.319133674657382	0.182227205719409	1.1287051691787	0.403076985078189	0	112BQT	south_america	0.403076985078189	-0.488594170000894	-0.594328256871921	no
LOC105199580	QT	0.319133674657382	0.182227205719409	1.1287051691787	0.235190364236576	0	111BQT	south_america	0.235190364236576	-0.304733403247833	-0.431432957219092	no
LOC105199580	W	0.712101156890665	0.127073279071061	1.3566622902154	0.487180040204335	0	104W	south_america	0.487180040204335	-0.572579312748018	-0.515716104785366	no
LOC105199580	W	0.712101156890665	0.127073279071061	1.3566622902154	0.923718090804182	0	114W	south_america	0.923718090804182	-0.943897396406448	-0.789415820872763	no
LOC105199580	W	0.712101156890665	0.127073279071061	1.3566622902154	0.64881647979822	0	112W	south_america	0.64881647979822	-0.721430829691621	-0.625435021583717	no
LOC105199580	W	0.712101156890665	0.127073279071061	1.3566622902154	0	0.55384702427365	28W	south_america	0.55384702427365	0.635844477886412	0.375016835423777	no
LOC105199580	W	0.712101156890665	0.127073279071061	1.3566622902154	0.77538583398311	0	43CW	south_america	0.77538583398311	-0.828132590974476	-0.704085222191795	no
LOC105199580	W	0.712101156890665	0.127073279071061	1.3566622902154	3.89289887878932	0	3BW	south_america	3.89289887878932	-2.29068946699808	-1.78214045124323	no
LOC105199719	QA	4.65667200117084	0.297259275323424	1.07755291546055	14.2055286974158	22.7329028599594	112BQA	south_america	36.9384315573751	0.64229259288193	0.320200811123079	no
LOC105199719	QA	4.65667200117084	0.297259275323424	1.07755291546055	2.51898497232903	2.35245633054132	118QA	south_america	4.87144130287036	-0.0699408135843048	-0.340772210477281	no
LOC105199719	QA	4.65667200117084	0.297259275323424	1.07755291546055	13.4088739158299	26.4600536978746	111BQA	south_america	39.8689276137045	0.930376856434653	0.587551267346007	no
LOC105199719	QA	4.65667200117084	0.297259275323424	1.07755291546055	3.46394284051568	0.715136586429044	43QA	south_america	4.17907942694473	-1.3799950827197	-1.55654013271939	no
LOC105199719	QA	4.65667200117084	0.297259275323424	1.07755291546055	2.06094646524141	2.38095623422992	114CQA	south_america	4.44190269947133	0.143453528054574	-0.142736143220506	no
LOC105199719	QA	4.65667200117084	0.297259275323424	1.07755291546055	0	4.01037677642904	3QA	south_america	4.01037677642904	2.32491909704265	1.88172644946406	no
LOC105199719	QH	1.93529479892015	-0.156919105199937	1.54693179210804	1.36410411257214	0	111BQH	south_america	1.36410411257214	-1.24129357163393	-0.700984020088105	no
LOC105199719	QH	1.93529479892015	-0.156919105199937	1.54693179210804	7.14286870268977	3.69487236321673	3QH	south_america	10.8377410659065	-0.794451203501393	-0.412126831676707	no
LOC105199719	QH	1.93529479892015	-0.156919105199937	1.54693179210804	0	0	114CQH	south_america	0	0	0.10143892962863	no
LOC105199719	QH	1.93529479892015	-0.156919105199937	1.54693179210804	0	1.19047811711496	118QH	south_america	1.19047811711496	1.1312458022037	0.832722498804053	no
LOC105199719	QH	1.93529479892015	-0.156919105199937	1.54693179210804	3.41026028143035	0	112BQH	south_america	3.41026028143035	-2.14086380218821	-1.28250302121253	no
LOC105199719	QH	1.93529479892015	-0.156919105199937	1.54693179210804	2.50648548526815	0	43QH	south_america	2.50648548526815	-1.81002575613728	-1.06863577267658	no
LOC105199719	QT	3.71757101557545	0.182227205719409	1.1287051691787	0.715136586429044	0	43QT	south_america	0.715136586429044	-0.778323471277037	-0.85102000347477	no
LOC105199719	QT	3.71757101557545	0.182227205719409	1.1287051691787	1.17595182118288	1.38249071664963	111BQT	south_america	2.55844253783251	0.130823979176924	-0.0455417658624602	no
LOC105199719	QT	3.71757101557545	0.182227205719409	1.1287051691787	0.583934831818398	3.53856774390798	118QT	south_america	4.12250257572638	1.51872411210406	1.18409744447006	no
LOC105199719	QT	3.71757101557545	0.182227205719409	1.1287051691787	3.3230821456419	1.12782137410891	3QT	south_america	4.45090351975081	-1.02268320519385	-1.06751563102171	no
LOC105199719	QT	3.71757101557545	0.182227205719409	1.1287051691787	0.806153970156377	2.50648548526815	112BQT	south_america	3.31263945542453	0.957104871893988	0.686519108208229	no
LOC105199719	QT	3.71757101557545	0.182227205719409	1.1287051691787	2.33573932727359	2.90769687743666	114CQT	south_america	5.24343620471025	0.228312007675127	0.0408297961364454	no
LOC105199719	W	2.66155812222121	0.127073279071061	1.3566622902154	1.74927396800566	1.66154107282095	28W	south_america	3.41081504082661	-0.0467888500122141	-0.128154316912333	no
LOC105199719	W	2.66155812222121	0.127073279071061	1.3566622902154	1.84743618160836	0	114W	south_america	1.84743618160836	-1.5096635077775	-1.20644378387542	no
LOC105199719	W	2.66155812222121	0.127073279071061	1.3566622902154	1.29763295959644	0.614668244019367	112W	south_america	1.91230120361581	-0.508910576249195	-0.468785680789639	no
LOC105199719	W	2.66155812222121	0.127073279071061	1.3566622902154	2.92308024122601	0.835495161756051	104W	south_america	3.75857540298206	-1.09581753247158	-0.901396626384065	no
LOC105199719	W	2.66155812222121	0.127073279071061	1.3566622902154	2.32615750194933	1.23162412107224	43CW	south_america	3.55778162302157	-0.575762435176493	-0.518062394242538	no
LOC105199719	W	2.66155812222121	0.127073279071061	1.3566622902154	0	0	3BW	south_america	0	0	-0.093666109825228	no
LOC105199739	QA	0.738470339141789	0.297259275323424	1.07755291546055	0.21627215993274	0.357568293214522	111BQA	south_america	0.573840453147262	0.15855868491541	-0.128718124574638	no
LOC105199739	QA	0.738470339141789	0.297259275323424	1.07755291546055	1.51567123619126	0	3QA	south_america	1.51567123619126	-1.33094339403446	-1.51101875926157	no
LOC105199739	QA	0.738470339141789	0.297259275323424	1.07755291546055	0	0.784152110180441	118QA	south_america	0.784152110180441	0.83523861932102	0.499260255602077	no
LOC105199739	QA	0.738470339141789	0.297259275323424	1.07755291546055	0.692788568103137	0	43QA	south_america	0.692788568103137	-0.75940178965543	-0.980611763764044	no
LOC105199739	QA	0.738470339141789	0.297259275323424	1.07755291546055	0.215235283294178	0	112BQA	south_america	0.215235283294178	-0.281235662950139	-0.536859888710258	no
LOC105199739	QA	0.738470339141789	0.297259275323424	1.07755291546055	0.686982155080468	1.19047811711496	114CQA	south_america	1.87746027219543	0.376801089344715	0.0738170839501603	no
LOC105199739	QH	3.49084731638761	-0.156919105199937	1.54693179210804	0	5.81539375487332	43QH	south_america	5.81539375487332	2.76879701019158	1.89130259673866	no
LOC105199739	QH	3.49084731638761	-0.156919105199937	1.54693179210804	1.70513014071517	1.45384843871833	112BQH	south_america	3.1589785794335	-0.140651858043397	0.0105158141034599	no
LOC105199739	QH	3.49084731638761	-0.156919105199937	1.54693179210804	3.57143435134488	0	3QH	south_america	3.57143435134488	-2.19264690202237	-1.31597773554599	no
LOC105199739	QH	3.49084731638761	-0.156919105199937	1.54693179210804	0	3.41026028143035	111BQH	south_america	3.41026028143035	2.14086380218821	1.48538088046979	no
LOC105199739	QH	3.49084731638761	-0.156919105199937	1.54693179210804	1.29763295959644	0	118QH	south_america	1.29763295959644	-1.20014834991483	-0.674386065395461	no
LOC105199739	QH	3.49084731638761	-0.156919105199937	1.54693179210804	7.51945645580446	4.54701370857379	114CQH	south_america	12.0664701643783	-0.619050098094946	-0.298740380960982	no
LOC105199739	QT	0.649535709123721	0.182227205719409	1.1287051691787	0.403076985078189	0	112BQT	south_america	0.403076985078189	-0.488594170000894	-0.594328256871921	no
LOC105199739	QT	0.649535709123721	0.182227205719409	1.1287051691787	0.583934831818398	0	118QT	south_america	0.583934831818398	-0.66351297951696	-0.749301242105386	no
LOC105199739	QT	0.649535709123721	0.182227205719409	1.1287051691787	0.235190364236576	0.345622679162408	111BQT	south_america	0.580813043398984	0.123540522885487	-0.0519946966102985	no
LOC105199739	QT	0.649535709123721	0.182227205719409	1.1287051691787	2.33573932727359	0	114CQT	south_america	2.33573932727359	-1.73800655318803	-1.70127134290055	no
LOC105199739	QT	0.649535709123721	0.182227205719409	1.1287051691787	1.66154107282095	0	3QT	south_america	1.66154107282095	-1.41226183006121	-1.41267097849906	no
LOC105199739	QT	0.649535709123721	0.182227205719409	1.1287051691787	0.715136586429044	0	43QT	south_america	0.715136586429044	-0.778323471277037	-0.85102000347477	no
LOC105199739	W	1.55546045271298	0.127073279071061	1.3566622902154	0	2.50648548526815	3BW	south_america	2.50648548526815	1.81002575613728	1.24050951309262	no
LOC105199739	W	1.55546045271298	0.127073279071061	1.3566622902154	0	2.46324824214449	43CW	south_america	2.46324824214449	1.79212580216841	1.2273154012654	no
LOC105199739	W	1.55546045271298	0.127073279071061	1.3566622902154	1.84743618160836	0	114W	south_america	1.84743618160836	-1.5096635077775	-1.20644378387542	no
LOC105199739	W	1.55546045271298	0.127073279071061	1.3566622902154	0.64881647979822	0.614668244019367	112W	south_america	1.26348472381759	-0.0301930560259896	-0.115921505470666	no
LOC105199739	W	1.55546045271298	0.127073279071061	1.3566622902154	0	0.835495161756051	104W	south_america	0.835495161756051	0.876169311593684	0.552161018939864	no
LOC105199739	W	1.55546045271298	0.127073279071061	1.3566622902154	0.437318492001414	0	28W	south_america	0.437318492001414	-0.523379780597576	-0.479450976385114	no
LOC105199756	QA	6.56578856505971	0.297259275323424	1.07755291546055	5.49585724064375	19.0476498738394	114CQA	south_america	24.5435071144831	1.62584129186147	1.23296220303966	no
LOC105199756	QA	6.56578856505971	0.297259275323424	1.07755291546055	0	0.357568293214522	111BQA	south_america	0.357568293214522	0.441024775417237	0.133418505978769	no
LOC105199756	QA	6.56578856505971	0.297259275323424	1.07755291546055	0.215235283294178	2.11468863813575	112BQA	south_america	2.32992392142993	1.3578522875643	0.984260723555817	no
LOC105199756	QA	6.56578856505971	0.297259275323424	1.07755291546055	13.2246711047274	9.40982532216529	118QA	south_america	22.6344964268927	-0.450449435406988	-0.693895121067758	no
LOC105199756	QA	6.56578856505971	0.297259275323424	1.07755291546055	4.84951997672196	5.00595610500331	43QA	south_america	9.85547608172527	0.0380756917643513	-0.240529796579222	no
LOC105199756	QA	6.56578856505971	0.297259275323424	1.07755291546055	2.2735068542869	1.00259419410726	3QA	south_america	3.27610104839416	-0.708966896844281	-0.933806737219623	no
LOC105199756	QH	169.741984791407	-0.156919105199937	1.54693179210804	1.36410411257214	1.70513014071517	111BQH	south_america	3.06923425328731	0.194404430495068	0.2271099071642	no
LOC105199756	QH	169.741984791407	-0.156919105199937	1.54693179210804	0	0	112BQH	south_america	0	0	0.10143892962863	no
LOC105199756	QH	169.741984791407	-0.156919105199937	1.54693179210804	50.0000809188284	31.4064150873422	3QH	south_america	81.4064960061706	-0.654220102688676	-0.321475710839879	no
LOC105199756	QH	169.741984791407	-0.156919105199937	1.54693179210804	95.2464484401898	162.831025136453	43QH	south_america	258.077473576643	0.767403379664292	0.59751987099873	no
LOC105199756	QH	169.741984791407	-0.156919105199937	1.54693179210804	160.906486989959	163.09550204475	118QH	south_america	324.001989034708	0.0193749040491068	0.113963660290933	no
LOC105199756	QH	169.741984791407	-0.156919105199937	1.54693179210804	180.466954939307	318.290959600166	114CQH	south_america	498.757914539472	0.815164847096674	0.628394837610733	no
LOC105199756	QT	5.71194983543832	0.182227205719409	1.1287051691787	15.733004901439	22.1692341793004	43QT	south_america	37.9022390807393	0.469513812274818	0.254527590021097	no
LOC105199756	QT	5.71194983543832	0.182227205719409	1.1287051691787	0	0	112BQT	south_america	0	0	-0.161448012018946	no
LOC105199756	QT	5.71194983543832	0.182227205719409	1.1287051691787	5.25541348636558	0.58976129065133	118QT	south_america	5.84517477701691	-1.97629509546089	-1.91238807097069	no
LOC105199756	QT	5.71194983543832	0.182227205719409	1.1287051691787	43.2111775545615	52.3385437938599	114CQT	south_america	95.5497213484214	0.27076727746883	0.0784439321863359	no
LOC105199756	QT	5.71194983543832	0.182227205719409	1.1287051691787	0.235190364236576	0	111BQT	south_america	0.235190364236576	-0.304733403247833	-0.431432957219092	no
LOC105199756	QT	5.71194983543832	0.182227205719409	1.1287051691787	3.3230821456419	2.25564274821782	3QT	south_america	5.57872489385972	-0.409117853177664	-0.523914548320324	no
LOC105199756	W	18.1053970994984	0.127073279071061	1.3566622902154	25.8205421308298	27.5713403379497	104W	south_america	53.3918824687794	0.091230318412895	-0.0264199579487648	no
LOC105199756	W	18.1053970994984	0.127073279071061	1.3566622902154	19.4644943939466	2.50648548526815	3BW	south_america	21.9709798792148	-2.54502536202477	-1.96961223170107	no
LOC105199756	W	18.1053970994984	0.127073279071061	1.3566622902154	0	0.55384702427365	28W	south_america	0.55384702427365	0.635844477886412	0.375016835423777	no
LOC105199756	W	18.1053970994984	0.127073279071061	1.3566622902154	1.94644943939466	12.2933648803873	112W	south_america	14.239814319782	2.17365691764411	1.508543174918	no
LOC105199756	W	18.1053970994984	0.127073279071061	1.3566622902154	62.0308667186488	93.6034332014905	43CW	south_america	155.634299920139	0.585834039634233	0.338153985610034	no
LOC105199756	W	18.1053970994984	0.127073279071061	1.3566622902154	0	0	114W	south_america	0	0	-0.093666109825228	no
LOC105199767	QA	12.9214545787393	0.297259275323424	1.07755291546055	4.3254431986548	5.72109269143235	111BQA	south_america	10.0465358900872	0.33579420476604	0.0357615193553129	no
LOC105199767	QA	12.9214545787393	0.297259275323424	1.07755291546055	6.82052056286069	8.02075355285809	3QA	south_america	14.8412741157188	0.205983312855387	-0.0847067101377813	no
LOC105199767	QA	12.9214545787393	0.297259275323424	1.07755291546055	4.73517623247192	8.45875455254302	112BQA	south_america	13.1939307850149	0.721812415840919	0.393997486736919	no
LOC105199767	QA	12.9214545787393	0.297259275323424	1.07755291546055	1.88923872924678	1.56830422036088	118QA	south_america	3.45754294960766	-0.169873311985369	-0.433512434151914	no
LOC105199767	QA	12.9214545787393	0.297259275323424	1.07755291546055	13.7396431016094	26.1905185765292	114CQA	south_america	39.9301616781385	0.883402074494262	0.543957322894273	no
LOC105199767	QA	12.9214545787393	0.297259275323424	1.07755291546055	6.92788568103137	5.72109269143235	43QA	south_america	12.6489783724637	-0.238240358900473	-0.49695901383648	no
LOC105199767	QH	14.5218379600421	-0.156919105199937	1.54693179210804	5.01297097053631	5.81539375487332	43QH	south_america	10.8283647254096	0.18071901669409	0.218263095772258	no
LOC105199767	QH	14.5218379600421	-0.156919105199937	1.54693179210804	12.5324274263408	4.54701370857379	114CQH	south_america	17.0794411349146	-1.28663745500498	-0.73029616145231	no
LOC105199767	QH	14.5218379600421	-0.156919105199937	1.54693179210804	13.6410411257214	5.81539375487333	112BQH	south_america	19.4564348805947	-1.10314923213668	-0.611681867141208	no
LOC105199767	QH	14.5218379600421	-0.156919105199937	1.54693179210804	8.18462467543283	8.52565070357586	111BQH	south_america	16.7102753790087	0.0525968798235375	0.135439704641381	no
LOC105199767	QH	14.5218379600421	-0.156919105199937	1.54693179210804	7.14286870268977	0	3QH	south_america	7.14286870268977	-3.02553714019678	-1.85439206151922	no
LOC105199767	QH	14.5218379600421	-0.156919105199937	1.54693179210804	5.19053183838576	7.14286870268977	118QH	south_america	12.3334005410755	0.395473781219015	0.35708936181743	no
LOC105199767	QT	25.1250502243173	0.182227205719409	1.1287051691787	16.5261563882057	17.0441012998234	112BQT	south_america	33.5702576880292	0.0420176530851769	-0.12422159166353	no
LOC105199767	QT	25.1250502243173	0.182227205719409	1.1287051691787	6.42328315000238	5.8976129065133	118QT	south_america	12.3208960565157	-0.105960232190187	-0.255325700438934	no
LOC105199767	QT	25.1250502243173	0.182227205719409	1.1287051691787	0.470380728473151	0	111BQT	south_america	0.470380728473151	-0.55618976319877	-0.654215989331819	no
LOC105199767	QT	25.1250502243173	0.182227205719409	1.1287051691787	7.86650245071949	11.9372799427002	43QT	south_america	19.8037823934197	0.545097298041849	0.321492363312629	no
LOC105199767	QT	25.1250502243173	0.182227205719409	1.1287051691787	15.784640191799	14.6616778634158	3QT	south_america	30.4463180552149	-0.0999028312731279	-0.249959019145654	no
LOC105199767	QT	25.1250502243173	0.182227205719409	1.1287051691787	19.8537842818255	16.4769489721411	114CQT	south_america	36.3307332539666	-0.254855860331578	-0.387242902740519	no
LOC105199767	W	12.3359445053296	0.127073279071061	1.3566622902154	19.4644943939466	5.01297097053631	3BW	south_america	24.4774653644829	-1.76697312466455	-1.39610750397942	no
LOC105199767	W	12.3359445053296	0.127073279071061	1.3566622902154	1.94872016081734	8.35495161756051	104W	south_america	10.3036717783779	1.66564127770048	1.13408326429206	no
LOC105199767	W	12.3359445053296	0.127073279071061	1.3566622902154	4.37318492001414	3.3230821456419	28W	south_america	7.69626706565604	-0.313717239684199	-0.324908064397718	no
LOC105199767	W	12.3359445053296	0.127073279071061	1.3566622902154	15.5715955151573	9.83469190430987	112W	south_america	25.4062874194672	-0.613054382607512	-0.545550404855038	no
LOC105199767	W	12.3359445053296	0.127073279071061	1.3566622902154	6.97847250584799	7.38974472643346	43CW	south_america	14.3682172322814	0.0725143485569447	-0.0402155576281653	no
LOC105199767	W	12.3359445053296	0.127073279071061	1.3566622902154	2.77115427241255	5.04202496660454	114W	south_america	7.81317923901709	0.680025975289192	0.407583154780796	no
LOC105199789	QA	10.2388716697753	0.297259275323424	1.07755291546055	6.92788568103137	1.43027317285809	43QA	south_america	8.35815885388946	-1.70581767132409	-1.85891283658343	sa
LOC105199789	QA	10.2388716697753	0.297259275323424	1.07755291546055	26.7923040481383	2.38095623422992	114CQA	south_america	29.1732602823682	-3.03918219626849	-3.09631334454319	sa
LOC105199789	QA	10.2388716697753	0.297259275323424	1.07755291546055	3.46035455892384	1.07270487964357	111BQA	south_america	4.53305943856741	-1.10564368212064	-1.30193416705152	sa
LOC105199789	QA	10.2388716697753	0.297259275323424	1.07755291546055	11.3354323754807	0.784152110180441	118QA	south_america	12.1195844856611	-2.78949776072439	-2.86459902967135	sa
LOC105199789	QA	10.2388716697753	0.297259275323424	1.07755291546055	12.8832055076257	0	3QA	south_america	12.8832055076257	-3.79526880660961	-3.79798339665192	sa
LOC105199789	QA	10.2388716697753	0.297259275323424	1.07755291546055	3.44376453270685	1.05734431906788	112BQA	south_america	4.50110885177473	-1.11099910801088	-1.30690415582275	sa
LOC105199789	QH	11.6035552201277	-0.156919105199937	1.54693179210804	12.9763295959644	0	118QH	south_america	12.9763295959644	-3.80491363092614	-2.35821291173737	sa
LOC105199789	QH	11.6035552201277	-0.156919105199937	1.54693179210804	7.14286870268977	0	3QH	south_america	7.14286870268977	-3.02553714019678	-1.85439206151922	sa
LOC105199789	QH	11.6035552201277	-0.156919105199937	1.54693179210804	10.230780844291	0	112BQH	south_america	10.230780844291	-3.48938633260126	-2.15424315693978	sa
LOC105199789	QH	11.6035552201277	-0.156919105199937	1.54693179210804	15.0389129116089	0	43QH	south_america	15.0389129116089	-4.00350445674384	-2.48659014648738	sa
LOC105199789	QH	11.6035552201277	-0.156919105199937	1.54693179210804	5.45641645028855	0	111BQH	south_america	5.45641645028855	-2.6907336380006	-1.63796137989238	sa
LOC105199789	QH	11.6035552201277	-0.156919105199937	1.54693179210804	35.0907967937541	0	114CQH	south_america	35.0907967937541	-5.17355908954141	-3.24296133154338	sa
LOC105199789	QT	7.41062596837069	0.182227205719409	1.1287051691787	6.6461642912838	0	3QT	south_america	6.6461642912838	-2.9347361993452	-2.7615390539344	sa
LOC105199789	QT	7.41062596837069	0.182227205719409	1.1287051691787	11.4421853828647	0.852662853050014	43QT	south_america	12.2948482359147	-2.74756763780618	-2.59571314416629	sa
LOC105199789	QT	7.41062596837069	0.182227205719409	1.1287051691787	2.41846191046913	0	112BQT	south_america	2.41846191046913	-1.77334735047182	-1.7325822629254	sa
LOC105199789	QT	7.41062596837069	0.182227205719409	1.1287051691787	14.0144359636416	0	114CQT	south_america	14.0144359636416	-3.90827837412865	-3.62406914714895	sa
LOC105199789	QT	7.41062596837069	0.182227205719409	1.1287051691787	8.17508764545757	0	118QT	south_america	8.17508764545757	-3.19772193943411	-2.99453678201274	sa
LOC105199789	QT	7.41062596837069	0.182227205719409	1.1287051691787	2.35190364236576	0	111BQT	south_america	2.35190364236576	-1.74498067628094	-1.70745021341816	sa
LOC105199789	W	6.81597912001533	0.127073279071061	1.3566622902154	9.30463000779732	0	43CW	south_america	9.30463000779732	-3.36522080010429	-2.57418084394524	sa
LOC105199789	W	6.81597912001533	0.127073279071061	1.3566622902154	7.78579775757864	0	112W	south_america	7.78579775757864	-3.13517329006389	-2.40461210771695	sa
LOC105199789	W	6.81597912001533	0.127073279071061	1.3566622902154	5.68514039601839	0	28W	south_america	5.68514039601839	-2.74095785897421	-2.11403468551479	sa
LOC105199789	W	6.81597912001533	0.127073279071061	1.3566622902154	5.54230854482509	0	114W	south_america	5.54230854482509	-2.70979980063015	-2.0910679836548	sa
LOC105199789	W	6.81597912001533	0.127073279071061	1.3566622902154	15.5715955151573	0	3BW	south_america	15.5715955151573	-4.05064060698147	-3.07940591861608	sa
LOC105199789	W	6.81597912001533	0.127073279071061	1.3566622902154	5.84616048245202	0	104W	south_america	5.84616048245202	-2.77529511129663	-2.13934478115912	sa
LOC105199797	QA	21.7387984103986	0.297259275323424	1.07755291546055	14.398876743817	6.01556516464357	3QA	south_america	20.4144419084606	-1.13419388352031	-1.32842957251146	sa
LOC105199797	QA	21.7387984103986	0.297259275323424	1.07755291546055	16.6269256344753	6.4362292778614	43QA	south_america	23.0631549123367	-1.24513771377103	-1.43138862784778	sa
LOC105199797	QA	21.7387984103986	0.297259275323424	1.07755291546055	8.86715855724234	7.50893415750496	111BQA	south_america	16.3760927147473	-0.213656263045634	-0.474144268034106	sa
LOC105199797	QA	21.7387984103986	0.297259275323424	1.07755291546055	10.5465288814147	7.13707415370817	112BQA	south_america	17.6836030351229	-0.504877170452505	-0.744405619684205	sa
LOC105199797	QA	21.7387984103986	0.297259275323424	1.07755291546055	12.3656787914484	27.3809966936441	114CQA	south_america	39.7466754850925	1.08639214697383	0.732337930071054	sa
LOC105199797	QA	21.7387984103986	0.297259275323424	1.07755291546055	15.1139098339742	10.1939774323457	118QA	south_america	25.3078872663199	-0.525583843706122	-0.763622006143302	sa
LOC105199797	QH	16.6680263668871	-0.156919105199937	1.54693179210804	12.5324274263408	4.54701370857379	114CQH	south_america	17.0794411349146	-1.28663745500498	-0.73029616145231	sa
LOC105199797	QH	16.6680263668871	-0.156919105199937	1.54693179210804	32.440823989911	11.9047811711496	118QH	south_america	44.3456051610606	-1.37370471862536	-0.786580002837286	sa
LOC105199797	QH	16.6680263668871	-0.156919105199937	1.54693179210804	10.7143030540346	5.54230854482509	3QH	south_america	16.2566115988597	-0.84039941743837	-0.441829637043686	sa
LOC105199797	QH	16.6680263668871	-0.156919105199937	1.54693179210804	17.0513014071517	10.1769390710283	112BQH	south_america	27.22824047818	-0.691577707644286	-0.345625195093934	sa
LOC105199797	QH	16.6680263668871	-0.156919105199937	1.54693179210804	2.50648548526815	5.81539375487332	43QH	south_america	8.32187924014148	0.958771254054304	0.721227894433449	sa
LOC105199797	QH	16.6680263668871	-0.156919105199937	1.54693179210804	9.54872878800497	3.41026028143035	111BQH	south_america	12.9589890694353	-1.25813344502106	-0.711870003214862	sa
LOC105199797	QT	10.7185539368425	0.182227205719409	1.1287051691787	14.9538696553886	3.38346412232673	3QT	south_america	18.3373337777153	-1.86376305113326	-1.81268794785572	sa
LOC105199797	QT	10.7185539368425	0.182227205719409	1.1287051691787	7.86650245071949	1.70532570610003	43QT	south_america	9.57182815681952	-1.71256282314275	-1.67872893701807	sa
LOC105199797	QT	10.7185539368425	0.182227205719409	1.1287051691787	12.8465663000048	2.94880645325665	118QT	south_america	15.7953727532614	-1.81003969573285	-1.76509061520639	sa
LOC105199797	QT	10.7185539368425	0.182227205719409	1.1287051691787	6.11494947015096	3.45622679162408	111BQT	south_america	9.57117626177504	-0.67503085296578	-0.759505743478585	sa
LOC105199797	QT	10.7185539368425	0.182227205719409	1.1287051691787	3.50360899091039	5.81539375487332	114CQT	south_america	9.31900274578371	0.597715433963949	0.36811050360199	sa
LOC105199797	QT	10.7185539368425	0.182227205719409	1.1287051691787	6.8523087463292	5.01297097053631	112BQT	south_america	11.8652797168655	-0.385038906005651	-0.50258130042749	sa
LOC105199797	W	15.6171238678914	0.127073279071061	1.3566622902154	5.42770083788177	3.69487236321673	43CW	south_america	9.1225732010985	-0.453216847055	-0.427733659519591	sa
LOC105199797	W	15.6171238678914	0.127073279071061	1.3566622902154	15.5715955151573	0	3BW	south_america	15.5715955151573	-4.05064060698147	-3.07940591861608	sa
LOC105199797	W	15.6171238678914	0.127073279071061	1.3566622902154	13.6251460757626	4.30267770813557	112W	south_america	17.9278237838982	-1.46365806380586	-1.17253302782107	sa
LOC105199797	W	15.6171238678914	0.127073279071061	1.3566622902154	7.30770060306503	8.35495161756051	104W	south_america	15.6626522206255	0.171280967500616	0.0325856248444386	sa
LOC105199797	W	15.6171238678914	0.127073279071061	1.3566622902154	12.0083351804544	6.30253120825568	114W	south_america	18.31086638871	-0.832967812624732	-0.707649279131484	sa
LOC105199797	W	15.6171238678914	0.127073279071061	1.3566622902154	9.1836883320297	3.3230821456419	28W	south_america	12.5067704776716	-1.23612801670993	-1.00481992137082	sa
LOC105201526	QA	13.2246703415099	0.297259275323424	1.07755291546055	5.03796994465807	11.7622816527066	118QA	south_america	16.8002515973647	1.07975079789106	0.726174567708535	no
LOC105201526	QA	13.2246703415099	0.297259275323424	1.07755291546055	0	0	112BQA	south_america	0	0	-0.27586513020233	no
LOC105201526	QA	13.2246703415099	0.297259275323424	1.07755291546055	3.78917809047816	12.0311303292871	3QA	south_america	15.8203084197653	1.4441122399302	1.0643124325051	no
LOC105201526	QA	13.2246703415099	0.297259275323424	1.07755291546055	11.0846170896502	18.5935512471552	43QA	south_america	29.6781683368053	0.697207142664996	0.371163087773406	no
LOC105201526	QA	13.2246703415099	0.297259275323424	1.07755291546055	5.62307615825124	5.00595610500331	111BQA	south_america	10.6290322632546	-0.141107516882704	-0.406816951554319	no
LOC105201526	QA	13.2246703415099	0.297259275323424	1.07755291546055	2.06094646524141	7.14286870268977	114CQA	south_america	9.20381516793117	1.41155932728422	1.0341023962471	no
LOC105201526	QH	0	-0.156919105199937	1.54693179210804	0	0	3QH	south_america	0	0	0.10143892962863	no
LOC105201526	QH	0	-0.156919105199937	1.54693179210804	0	0	118QH	south_america	0	0	0.10143892962863	no
LOC105201526	QH	0	-0.156919105199937	1.54693179210804	0	0	114CQH	south_america	0	0	0.10143892962863	no
LOC105201526	QH	0	-0.156919105199937	1.54693179210804	0	1.45384843871833	112BQH	south_america	1.45384843871833	1.2950461440856	0.938609741355765	no
LOC105201526	QH	0	-0.156919105199937	1.54693179210804	0	0	111BQH	south_america	0	0	0.10143892962863	no
LOC105201526	QH	0	-0.156919105199937	1.54693179210804	0	0	43QH	south_america	0	0	0.10143892962863	no
LOC105201526	QT	0.484616146239444	0.182227205719409	1.1287051691787	0	0	118QT	south_america	0	0	-0.161448012018946	no
LOC105201526	QT	0.484616146239444	0.182227205719409	1.1287051691787	0	0	3QT	south_america	0	0	-0.161448012018946	no
LOC105201526	QT	0.484616146239444	0.182227205719409	1.1287051691787	0.705571092709727	0.345622679162408	111BQT	south_america	1.05119377187213	-0.341980965412629	-0.464433215552187	no
LOC105201526	QT	0.484616146239444	0.182227205719409	1.1287051691787	0	2.55798855915004	43QT	south_america	2.55798855915004	1.83106187157077	1.46081962843418	no
LOC105201526	QT	0.484616146239444	0.182227205719409	1.1287051691787	0	0	112BQT	south_america	0	0	-0.161448012018946	no
LOC105201526	QT	0.484616146239444	0.182227205719409	1.1287051691787	0	0.969232292478887	114CQT	south_america	0.969232292478887	0.97763330293098	0.704706701919641	no
LOC105201526	W	24.6724054188732	0.127073279071061	1.3566622902154	1.74927396800566	4.4307761941892	28W	south_america	6.18005016219486	0.982107730014982	0.630248557146943	no
LOC105201526	W	24.6724054188732	0.127073279071061	1.3566622902154	5.42770083788177	19.7059859371559	43CW	south_america	25.1336867750377	1.68767321091215	1.1503230708899	no
LOC105201526	W	24.6724054188732	0.127073279071061	1.3566622902154	11.678696636368	12.5324274263408	3BW	south_america	24.2111240627087	0.0940142062038278	-0.0243679455865056	no
LOC105201526	W	24.6724054188732	0.127073279071061	1.3566622902154	48.0124195050683	51.6321324976268	112W	south_america	99.6445520026951	0.10279648237966	-0.0178945024612912	no
LOC105201526	W	24.6724054188732	0.127073279071061	1.3566622902154	3.69487236321673	0	114W	south_america	3.69487236321673	-2.23108593669539	-1.73820650339742	no
LOC105201526	W	24.6724054188732	0.127073279071061	1.3566622902154	7.79488064326936	20.0518838821452	104W	south_america	27.8467645254146	1.25921343845884	0.834504038000517	no
LOC105201534	QA	5.85776085474243	0.297259275323424	1.07755291546055	0	0	112BQA	south_america	0	0	-0.27586513020233	no
LOC105201534	QA	5.85776085474243	0.297259275323424	1.07755291546055	2.06094646524141	9.52382493691969	114CQA	south_america	11.5847714021611	1.78160943666133	1.37751950743272	no
LOC105201534	QA	5.85776085474243	0.297259275323424	1.07755291546055	1.38557713620627	4.29081951857427	43QA	south_america	5.67639665478054	1.14915286934585	0.790581679841056	no
LOC105201534	QA	5.85776085474243	0.297259275323424	1.07755291546055	5.03796994465807	1.56830422036088	118QA	south_america	6.60627416501895	-1.23324747306866	-1.42035414357164	no
LOC105201534	QA	5.85776085474243	0.297259275323424	1.07755291546055	3.03134247238253	3.00778258232178	3QA	south_america	6.03912505470431	-0.00845610278066141	-0.283712636027181	no
LOC105201534	QA	5.85776085474243	0.297259275323424	1.07755291546055	0.64881647979822	1.78784146607261	111BQA	south_america	2.43665794587083	0.757717693274457	0.427318613633218	no
LOC105201534	QH	3.79615847264648	-0.156919105199937	1.54693179210804	0	0	43QH	south_america	0	0	0.10143892962863	no
[truncated: 929 more rows]
