# Supplementary material for: Genomic architecture and evolutionary antagonism drive allelic expression bias in the social supergene of red fire ants
Source: eLife journal article supplement (doi:10.7554/elife.55862), 2020-08-10
Supplement: supp [file elife-55862-supp-v1.zip › elife_poa_e55862_Figure_1_figure_supplement_3_source_data_1.csv]

refseq_id	body_part	median_expression	littleb_expression	bigB_expression	sample_id	population	total_expression	lfc_SB-Sb	significant
LOC105193112	whole_body_queen	31.182569414886	16.3711244992053	14.4657975233671	Queen2	north_america	30.8369220225723	-0.167609917560186	no
LOC105193112	whole_body_queen	31.182569414886	10.4132467425794	9.963639190302	Queen3	north_america	20.3768859328814	-0.0579825000815643	no
LOC105193112	whole_body_queen	31.182569414886	17.2574352621072	14.8210699187388	Queen5	north_america	32.078505180846	-0.206636947935889	no
LOC105193112	whole_body_queen	31.182569414886	18.8331491554397	12.1733134923543	Queen6	north_america	31.006462647794	-0.5902954970779	no
LOC105193112	whole_body_queen	31.182569414886	14.6993794603022	16.6592967216758	Queen1	north_america	31.358676181978	0.169720353333226	no
LOC105193112	whole_body_queen	31.182569414886	15.2604983266759	16.2303101577374	Queen4	north_america	31.4908084844133	0.0835771997418937	no
LOC105193113	whole_body_queen	62.384739854809	34.5148705242143	29.6421398374776	Queen5	north_america	64.1570103616919	-0.212906176993313	no
LOC105193113	whole_body_queen	62.384739854809	26.5064462538385	19.927278380604	Queen3	north_america	46.4337246344425	-0.394385060589079	no
LOC105193113	whole_body_queen	62.384739854809	30.3787175512912	33.3185934433516	Queen1	north_america	63.6973109946428	0.129204034269961	no
LOC105193113	whole_body_queen	62.384739854809	31.8806108668734	28.0274827015237	Queen2	north_america	59.9080935683971	-0.179817637007679	no
LOC105193113	whole_body_queen	62.384739854809	30.5209966533517	30.5511720616234	Queen4	north_america	61.0721687149751	0.00138044770233119	no
LOC105193113	whole_body_queen	62.384739854809	39.7588704392616	36.5199404770628	Queen6	north_america	76.2788109163244	-0.119456531176804	no
LOC105193114	whole_body_queen	42.4021415016425	21.571794077634	20.1143091754312	Queen5	north_america	41.6861032530652	-0.0963000476911977	no
LOC105193114	whole_body_queen	42.4021415016425	20.6793151568909	23.5069209754715	Queen2	north_america	44.1862361323623	0.176870053753567	no
LOC105193114	whole_body_queen	42.4021415016425	20.9257212838219	18.2599702385314	Queen6	north_america	39.1856915223533	-0.187018829494481	no
LOC105193114	whole_body_queen	42.4021415016425	21.5590898751099	21.5590898751099	Queen1	north_america	43.1181797502198	0	no
LOC105193114	whole_body_queen	42.4021415016425	27.4531050486184	19.927278380604	Queen3	north_america	47.3803834292224	-0.443201401016407	no
LOC105193114	whole_body_queen	42.4021415016425	20.9831851991793	19.0944825385146	Queen4	north_america	40.0776677376939	-0.129601010730446	no
LOC105193116	whole_body_queen	4.58713413193721	3.78663517911978	3.9854556761208	Queen3	north_america	7.77209085524058	0.0587135215696023	no
LOC105193116	whole_body_queen	4.58713413193721	1.95991726137363	2.93987589206044	Queen1	north_america	4.89979315343406	0.41259333609204	no
LOC105193116	whole_body_queen	4.58713413193721	2.1571794077634	2.11729570267697	Queen5	north_america	4.27447511044037	-0.0183412309449293	no
LOC105193116	whole_body_queen	4.58713413193721	1.04628606419109	1.01444279102952	Queen6	north_america	2.06072885522062	-0.0226270089030178	no
LOC105193116	whole_body_queen	4.58713413193721	2.86134343625172	3.81889650770292	Queen4	north_america	6.68023994395465	0.319599941180887	no
LOC105193116	whole_body_queen	4.58713413193721	1.72327626307424	1.80822469042088	Queen2	north_america	3.53150095349512	0.0443150283622435	no
LOC105193117	whole_body_queen	18.8223919365494	11.3599055373594	9.963639190302	Queen3	north_america	21.3235447276613	-0.172940961800419	no
LOC105193117	whole_body_queen	18.8223919365494	8.6163813153712	9.94523579731485	Queen2	north_america	18.561617112686	0.186737026340567	no
LOC105193117	whole_body_queen	18.8223919365494	10.4628606419109	10.1444279102952	Queen6	north_america	20.6072885522062	-0.0406445652985365	no
LOC105193117	whole_body_queen	18.8223919365494	7.8396690454945	8.81962767618131	Queen1	north_america	16.6592967216758	0.151675967371404	no
LOC105193117	whole_body_queen	18.8223919365494	11.4453737450069	7.63779301540584	Queen4	north_america	19.0831667604127	-0.526874905066218	no
LOC105193117	whole_body_queen	18.8223919365494	5.39294851940849	4.23459140535394	Queen5	north_america	9.62753992476243	-0.288404546661333	no
LOC105193118	whole_body_queen	15.29101580458	7.8396690454945	7.8396690454945	Queen1	north_america	15.679338090989	0	no
LOC105193118	whole_body_queen	15.29101580458	4.76890572708621	9.5472412692573	Queen4	north_america	14.3161469963435	0.870496104918218	no
LOC105193118	whole_body_queen	15.29101580458	9.47801944690832	5.42467407126264	Queen2	north_america	14.902693518171	-0.705670872494885	no
LOC105193118	whole_body_queen	15.29101580458	6.27771638514657	8.11554232823618	Queen6	north_america	14.3932587133828	0.324842661804102	no
LOC105193118	whole_body_queen	15.29101580458	9.46658794779946	9.963639190302	Queen3	north_america	19.4302271381015	0.0669355474722861	no
LOC105193118	whole_body_queen	15.29101580458	8.62871763105359	8.46918281070788	Queen5	north_america	17.0979004417615	-0.0241037436256084	no
LOC105193119	whole_body_queen	7.72936099368256	3.91983452274725	7.8396690454945	Queen1	north_america	11.7595035682418	0.845382564828784	no
LOC105193119	whole_body_queen	7.72936099368256	2.58491439461136	3.61644938084176	Queen2	north_america	6.20136377545312	0.36484499891452	no
LOC105193119	whole_body_queen	7.72936099368256	1.90756229083448	1.90944825385146	Queen4	north_america	3.81701054468594	0.000935487246009695	no
LOC105193119	whole_body_queen	7.72936099368256	4.18514425676438	5.07221395514762	Queen6	north_america	9.25735821191199	0.22783849811587	no
LOC105193119	whole_body_queen	7.72936099368256	4.31435881552679	8.46918281070788	Queen5	north_america	12.7835416262347	0.833344287487403	no
LOC105193119	whole_body_queen	7.72936099368256	1.89331758955989	3.9854556761208	Queen3	north_america	5.87877326568069	0.785000682908611	no
LOC105193120	whole_body_queen	8.25250402577811	1.90756229083448	2.86417238077719	Queen4	north_america	4.77173467161168	0.410349354311585	no
LOC105193120	whole_body_queen	8.25250402577811	4.31435881552679	8.46918281070788	Queen5	north_america	12.7835416262347	0.833344287487403	no
LOC105193120	whole_body_queen	8.25250402577811	2.58491439461136	3.61644938084176	Queen2	north_america	6.20136377545312	0.36484499891452	no
LOC105193120	whole_body_queen	8.25250402577811	0.946658794779946	4.981819595151	Queen3	north_america	5.92847838993094	1.61958436664348	no
LOC105193120	whole_body_queen	8.25250402577811	5.23143032095547	5.07221395514762	Queen6	north_america	10.3036442761031	-0.0373407226849389	no
LOC105193120	whole_body_queen	8.25250402577811	3.91983452274725	7.8396690454945	Queen1	north_america	11.7595035682418	0.845382564828784	no
LOC105193121	whole_body_queen	1.93468275761254	1.72327626307424	1.80822469042088	Queen2	north_america	3.53150095349512	0.0443150283622435	no
LOC105193121	whole_body_queen	1.93468275761254	1.04628606419109	0	Queen6	north_america	1.04628606419109	-1.03300784329498	no
LOC105193121	whole_body_queen	1.93468275761254	0.946658794779946	0	Queen3	north_america	0.946658794779946	-0.961000034434703	no
LOC105193121	whole_body_queen	1.93468275761254	0	1.90944825385146	Queen4	north_america	1.90944825385146	1.5407455871871	no
LOC105193121	whole_body_queen	1.93468275761254	1.0785897038817	1.05864785133848	Queen5	north_america	2.13723755522018	-0.0139079442243087	no
LOC105193121	whole_body_queen	1.93468275761254	0	1.95991726137363	Queen1	north_america	1.95991726137363	1.56555684873454	no
LOC105193122	whole_body_queen	3.87638054827824	0.946658794779946	2.9890917570906	Queen3	north_america	3.93575055187054	1.03506027424409	no
LOC105193122	whole_body_queen	3.87638054827824	0.979958630686813	0.979958630686813	Queen1	north_america	1.95991726137363	0	no
LOC105193122	whole_body_queen	3.87638054827824	6.89310505229696	3.61644938084176	Queen2	north_america	10.5095544331387	-0.773809283074346	no
LOC105193122	whole_body_queen	3.87638054827824	1.90756229083448	1.90944825385146	Queen4	north_america	3.81701054468594	0.000935487246009695	no
LOC105193122	whole_body_queen	3.87638054827824	4.18514425676438	2.02888558205905	Queen6	north_america	6.21402983882342	-0.775597046550775	no
LOC105193122	whole_body_queen	3.87638054827824	1.0785897038817	1.05864785133848	Queen5	north_america	2.13723755522018	-0.0139079442243087	no
LOC105193123	whole_body_queen	5.58222423311875	0.953781145417242	3.81889650770292	Queen4	north_america	4.77267765312016	1.30243394603857	no
LOC105193123	whole_body_queen	5.58222423311875	3.78663517911978	2.9890917570906	Queen3	north_america	6.77572693621038	-0.262951544311922	no
LOC105193123	whole_body_queen	5.58222423311875	2.1571794077634	4.23459140535394	Queen5	north_america	6.39177081311733	0.729440685012571	no
LOC105193123	whole_body_queen	5.58222423311875	8.37028851352876	5.07221395514762	Queen6	north_america	13.4425024686764	-0.625870844337359	no
LOC105193123	whole_body_queen	5.58222423311875	0	0.979958630686813	Queen1	north_america	0.979958630686813	0.985470286907668	no
LOC105193123	whole_body_queen	5.58222423311875	0.86163813153712	2.71233703563132	Queen2	north_america	3.57397516716844	0.99575502922616	no
LOC105193124	whole_body_queen	23.6677342380406	15.1465407164791	11.9563670283624	Queen3	north_america	27.1029077448415	-0.317563868159062	no
LOC105193124	whole_body_queen	23.6677342380406	14.6993794603022	14.6993794603022	Queen1	north_america	29.3987589206044	0	no
LOC105193124	whole_body_queen	23.6677342380406	11.8644867426987	6.35188710803091	Queen5	north_america	18.2163738507296	-0.807207380100691	no
LOC105193124	whole_body_queen	23.6677342380406	7.63024916333793	8.59251714233157	Queen4	north_america	16.2227663056695	0.152507226045997	no
LOC105193124	whole_body_queen	23.6677342380406	11.2012957099826	13.5616851781566	Queen2	north_america	24.7629808881392	0.255142961629361	no
LOC105193124	whole_body_queen	23.6677342380406	8.37028851352876	14.2021990744133	Queen6	north_america	22.5724875879421	0.698114657222366	no
LOC105193126	whole_body_queen	0.966869888052027	0	0.979958630686813	Queen1	north_america	0.979958630686813	0.985470286907668	no
LOC105193126	whole_body_queen	0.966869888052027	0.953781145417242	0	Queen4	north_america	0.953781145417242	-0.966268871551673	no
LOC105193126	whole_body_queen	0.966869888052027	1.04628606419109	0	Queen6	north_america	1.04628606419109	-1.03300784329498	no
LOC105193126	whole_body_queen	0.966869888052027	0	1.05864785133848	Queen5	north_america	1.05864785133848	1.04169706621221	no
LOC105193126	whole_body_queen	0.966869888052027	0.86163813153712	0	Queen2	north_america	0.86163813153712	-0.896572666573614	no
LOC105193126	whole_body_queen	0.966869888052027	0.946658794779946	0	Queen3	north_america	0.946658794779946	-0.961000034434703	no
LOC105193129	whole_body_queen	8.31827541501256	0.946658794779946	3.9854556761208	Queen3	north_america	4.93211447090074	1.35672534012562	no
LOC105193129	whole_body_queen	8.31827541501256	8.58403030875517	2.86417238077719	Queen4	north_america	11.4482026895324	-1.31047301629281	no
LOC105193129	whole_body_queen	8.31827541501256	1.95991726137363	2.93987589206044	Queen1	north_america	4.89979315343406	0.41259333609204	no
LOC105193129	whole_body_queen	8.31827541501256	7.32400244933766	4.05777116411809	Queen6	north_america	11.3817736134558	-0.718775624997263	no
LOC105193129	whole_body_queen	8.31827541501256	8.62871763105359	3.17594355401545	Queen5	north_america	11.804661185069	-1.20524145907456	no
LOC105193129	whole_body_queen	8.31827541501256	3.44655252614848	1.80822469042088	Queen2	north_america	5.25477721656936	-0.663028855456073	no
LOC105193130	whole_body_queen	2.41481636915415	0	3.9854556761208	Queen3	north_america	3.9854556761208	2.31772537456032	na
LOC105193130	whole_body_queen	2.41481636915415	0	1.01444279102952	Queen6	north_america	1.01444279102952	1.01038083439196	na
LOC105193130	whole_body_queen	2.41481636915415	0	2.71233703563132	Queen2	north_america	2.71233703563132	1.89232769579977	na
LOC105193130	whole_body_queen	2.41481636915415	0	5.87975178412087	Queen1	north_america	5.87975178412087	2.7823565145963	na
LOC105193130	whole_body_queen	2.41481636915415	0	0.95472412692573	Queen4	north_america	0.95472412692573	0.966965012238482	na
LOC105193130	whole_body_queen	2.41481636915415	0	2.11729570267697	Queen5	north_america	2.11729570267697	1.64029501365793	na
LOC105193131	whole_body_queen	26.3739210315064	15.1002558543438	22.2316048781082	Queen5	north_america	37.331860732452	0.529005206522019	no
LOC105193131	whole_body_queen	26.3739210315064	9.53781145417242	10.501965396183	Queen4	north_america	20.0397768503555	0.126305130576231	no
LOC105193131	whole_body_queen	26.3739210315064	16.7405770270575	15.2166418654428	Queen6	north_america	31.9572188925004	-0.12957783738672	no
LOC105193131	whole_body_queen	26.3739210315064	11.7595035682417	15.679338090989	Queen1	north_america	27.4388416592308	0.386489837963094	no
LOC105193131	whole_body_queen	26.3739210315064	11.3599055373594	13.9490948664228	Queen3	north_america	25.3090004037822	0.274390417928738	no
LOC105193131	whole_body_queen	26.3739210315064	7.75474318383408	10.8493481425253	Queen2	north_america	18.6040913263594	0.436670931999285	no
LOC105193132	whole_body_queen	20.3895380964184	12.3065643321393	5.9781835141812	Queen3	north_america	18.2847478463205	-0.931214681374592	no
LOC105193132	whole_body_queen	20.3895380964184	5.72268687250345	9.5472412692573	Queen4	north_america	15.2699281417608	0.649755838949828	no
LOC105193132	whole_body_queen	20.3895380964184	12.0629338415197	8.13701110689397	Queen2	north_america	20.1999449484136	-0.51568473815568	no
LOC105193132	whole_body_queen	20.3895380964184	16.6592967216758	3.91983452274725	Queen1	north_america	20.5791312444231	-1.84374619220863	no
LOC105193132	whole_body_queen	20.3895380964184	21.571794077634	15.8797177700773	Queen5	north_america	37.4515118477112	-0.41923031075855	no
LOC105193132	whole_body_queen	20.3895380964184	17.7868630912486	10.1444279102952	Queen6	north_america	27.9312910015438	-0.753401636012095	no
LOC105193134	whole_body_queen	28.4939052830776	8.58403030875517	27.6869996808462	Queen4	north_america	36.2710299896014	1.58169271158705	na
LOC105193134	whole_body_queen	28.4939052830776	8.37028851352876	18.2599702385314	Queen6	north_america	26.6302587520602	1.03944009923621	na
LOC105193134	whole_body_queen	28.4939052830776	7.75474318383408	22.602808630261	Queen2	north_america	30.3575518140951	1.43082178052777	na
LOC105193134	whole_body_queen	28.4939052830776	5.87975178412087	12.7394621989286	Queen1	north_america	18.6192139830494	0.997897114423519	na
LOC105193134	whole_body_queen	28.4939052830776	5.39294851940849	17.9970134727542	Queen5	north_america	23.3899619921627	1.57121924839255	na
LOC105193134	whole_body_queen	28.4939052830776	11.3599055373594	23.9127340567248	Queen3	north_america	35.2726395940841	1.01121564209307	na
LOC105193135	whole_body_queen	14.2518969243183	8.81962767618131	3.91983452274725	Queen1	north_america	12.7394621989286	-0.997058532200187	no
LOC105193135	whole_body_queen	14.2518969243183	8.62871763105359	3.17594355401545	Queen5	north_america	11.804661185069	-1.20524145907456	no
LOC105193135	whole_body_queen	14.2518969243183	7.32400244933766	4.05777116411809	Queen6	north_america	11.3817736134558	-0.718775624997263	no
LOC105193135	whole_body_queen	14.2518969243183	10.4915925995897	5.72834476155438	Queen4	north_america	16.219937361144	-0.772255215861936	no
LOC105193135	whole_body_queen	14.2518969243183	10.3396575784454	5.42467407126264	Queen2	north_america	15.7643316497081	-0.819681903912565	no
LOC105193135	whole_body_queen	14.2518969243183	11.3599055373594	4.981819595151	Queen3	north_america	16.3417251325104	-1.047011411056	no
LOC105193137	whole_body_queen	5.6308006758549	0.946658794779946	4.981819595151	Queen3	north_america	5.92847838993094	1.61958436664348	no
LOC105193137	whole_body_queen	5.6308006758549	1.04628606419109	6.08665674617714	Queen6	north_america	7.13294281036823	1.79209732813755	no
LOC105193137	whole_body_queen	5.6308006758549	1.72327626307424	4.5205617260522	Queen2	north_america	6.24383798912644	1.0194717268474	no
LOC105193137	whole_body_queen	5.6308006758549	1.90756229083448	1.90944825385146	Queen4	north_america	3.81701054468594	0.000935487246009695	no
LOC105193137	whole_body_queen	5.6308006758549	0.979958630686813	0.979958630686813	Queen1	north_america	1.95991726137363	0	no
LOC105193137	whole_body_queen	5.6308006758549	2.1571794077634	3.17594355401545	Queen5	north_america	5.33312296177885	0.403465966612326	no
LOC105193138	whole_body_queen	2.96448382457552	0	2.9890917570906	Queen3	north_america	2.9890917570906	1.9960603086788	na
LOC105193138	whole_body_queen	2.96448382457552	0.953781145417242	2.86417238077719	Queen4	north_america	3.81795352619443	0.983890582701003	na
LOC105193138	whole_body_queen	2.96448382457552	0	7.10109953720666	Queen6	north_america	7.10109953720666	3.01811773382675	na
LOC105193138	whole_body_queen	2.96448382457552	0	2.93987589206044	Queen1	north_america	2.93987589206044	1.97815018482658	na
LOC105193138	whole_body_queen	2.96448382457552	0	2.71233703563132	Queen2	north_america	2.71233703563132	1.89232769579977	na
LOC105193138	whole_body_queen	2.96448382457552	0	2.11729570267697	Queen5	north_america	2.11729570267697	1.64029501365793	na
LOC105193139	whole_body_queen	0.907709638477181	0.86163813153712	0	Queen2	north_america	0.86163813153712	-0.896572666573614	no
LOC105193139	whole_body_queen	0.907709638477181	0.953781145417242	0	Queen4	north_america	0.953781145417242	-0.966268871551673	no
LOC105193139	whole_body_queen	0.907709638477181	0	1.05864785133848	Queen5	north_america	1.05864785133848	1.04169706621221	no
LOC105193139	whole_body_queen	0.907709638477181	0	0.979958630686813	Queen1	north_america	0.979958630686813	0.985470286907668	no
LOC105193139	whole_body_queen	0.907709638477181	0	0	Queen3	north_america	0	0	no
LOC105193139	whole_body_queen	0.907709638477181	0	0	Queen6	north_america	0	0	no
LOC105193142	whole_body_queen	1.02750588518434	1.04628606419109	1.01444279102952	Queen6	north_america	2.06072885522062	-0.0226270089030178	no
LOC105193142	whole_body_queen	1.02750588518434	0	0.904112345210441	Queen2	north_america	0.904112345210441	0.929118602120862	no
LOC105193142	whole_body_queen	1.02750588518434	0.979958630686813	0.979958630686813	Queen1	north_america	1.95991726137363	0	no
LOC105193142	whole_body_queen	1.02750588518434	0	0.95472412692573	Queen4	north_america	0.95472412692573	0.966965012238482	no
LOC105193142	whole_body_queen	1.02750588518434	0	1.05864785133848	Queen5	north_america	1.05864785133848	1.04169706621221	no
LOC105193142	whole_body_queen	1.02750588518434	0	0.996363919030199	Queen3	north_america	0.996363919030199	0.997374734865391	no
LOC105193145	whole_body_queen	33.3219689383574	14.1998819216992	13.9490948664228	Queen3	north_america	28.148976788122	-0.024001981148521	no
LOC105193145	whole_body_queen	33.3219689383574	17.2327626307424	16.2740222137879	Queen2	north_america	33.5067848445303	-0.0779291253022684	no
LOC105193145	whole_body_queen	33.3219689383574	11.7595035682417	13.7194208296154	Queen1	north_america	25.4789243978571	0.206148706754392	no
LOC105193145	whole_body_queen	33.3219689383574	19.0756229083448	17.1850342846631	Queen4	north_america	36.260657193008	-0.142693106774366	no
LOC105193145	whole_body_queen	33.3219689383574	17.2574352621072	15.8797177700773	Queen5	north_america	33.1371530321844	-0.113193332723314	no
LOC105193145	whole_body_queen	33.3219689383574	19.8794352196308	21.30329861162	Queen6	north_america	41.1827338312508	0.0951744094190187	no
LOC105193214	whole_body_queen	30.0585303765569	35.2785107047252	35.2785107047252	Queen1	north_america	70.5570214094505	0	no
LOC105193214	whole_body_queen	30.0585303765569	16.3711244992053	12.6575728329462	Queen2	north_america	29.0286973321514	-0.346990031585064	no
LOC105193214	whole_body_queen	30.0585303765569	15.1465407164791	15.9418227044832	Queen3	north_america	31.0883634209623	0.0693639862474121	no
LOC105193214	whole_body_queen	30.0585303765569	17.2574352621072	14.8210699187388	Queen5	north_america	32.078505180846	-0.206636947935889	no
LOC105193214	whole_body_queen	30.0585303765569	11.509146706102	15.2166418654428	Queen6	north_america	26.7257885715449	0.374491716433034	no
LOC105193214	whole_body_queen	30.0585303765569	15.2604983266759	13.3661377769602	Queen4	north_america	28.6266361036361	-0.17869921486477	no
LOC105193215	whole_body_queen	4.51194587552822	1.72327626307424	0.904112345210441	Queen2	north_america	2.62738860828468	-0.516224742049444	no
LOC105193215	whole_body_queen	4.51194587552822	5.72268687250345	2.86417238077719	Queen4	north_america	8.58685925328064	-0.79887849942106	no
LOC105193215	whole_body_queen	4.51194587552822	1.95991726137363	1.95991726137363	Queen1	north_america	3.91983452274725	0	no
LOC105193215	whole_body_queen	4.51194587552822	1.04628606419109	4.05777116411809	Queen6	north_america	5.10405722830919	1.30549392129407	no
LOC105193215	whole_body_queen	4.51194587552822	0.946658794779946	0.996363919030199	Queen3	north_america	1.94302271381015	0.0363747004306876	no
LOC105193215	whole_body_queen	4.51194587552822	4.31435881552679	5.29323925669242	Queen5	north_america	9.60759807221921	0.243907153229837	no
LOC105193216	whole_body_queen	0.963308712733379	0	0	Queen4	north_america	0	0	no
LOC105193216	whole_body_queen	0.963308712733379	0.979958630686813	0	Queen1	north_america	0.979958630686813	-0.985470286907669	no
LOC105193216	whole_body_queen	0.963308712733379	1.0785897038817	1.05864785133848	Queen5	north_america	2.13723755522018	-0.0139079442243087	no
LOC105193216	whole_body_queen	0.963308712733379	0.946658794779946	0	Queen3	north_america	0.946658794779946	-0.961000034434703	no
LOC105193216	whole_body_queen	0.963308712733379	0	1.01444279102952	Queen6	north_america	1.01444279102952	1.01038083439196	no
LOC105193216	whole_body_queen	0.963308712733379	0	0.904112345210441	Queen2	north_america	0.904112345210441	0.929118602120862	no
LOC105193217	whole_body_queen	6.61857236306059	4.76890572708621	5.72834476155438	Queen4	north_america	10.4972504886406	0.221953943726224	no
LOC105193217	whole_body_queen	6.61857236306059	2.83997638433984	3.9854556761208	Queen3	north_america	6.82543206046064	0.376627936087995	no
LOC105193217	whole_body_queen	6.61857236306059	0.979958630686813	0.979958630686813	Queen1	north_america	1.95991726137363	0	no
LOC105193217	whole_body_queen	6.61857236306059	3.44655252614848	4.5205617260522	Queen2	north_america	7.96711425220068	0.312127843029085	no
LOC105193217	whole_body_queen	6.61857236306059	3.13885819257328	3.04332837308857	Queen6	north_america	6.18218656566185	-0.0336894443797355	no
LOC105193217	whole_body_queen	6.61857236306059	3.2357691116451	3.17594355401545	Queen5	north_america	6.41171266566055	-0.0205217401162448	no
LOC105193218	whole_body_queen	12.4665052324829	13.3529360358414	10.501965396183	Queen4	north_america	23.8549014320244	-0.319465482232436	no
LOC105193218	whole_body_queen	12.4665052324829	11.2012957099826	10.8493481425253	Queen2	north_america	22.0506438525078	-0.0422266665124738	no
LOC105193218	whole_body_queen	12.4665052324829	6.27771638514657	4.05777116411809	Queen6	north_america	10.3354875492647	-0.524984065415039	no
LOC105193218	whole_body_queen	12.4665052324829	6.62661156345962	7.9709113522416	Queen3	north_america	14.5975229157012	0.234212332882933	no
LOC105193218	whole_body_queen	12.4665052324829	0.979958630686813	0.979958630686813	Queen1	north_america	1.95991726137363	0	no
LOC105193218	whole_body_queen	12.4665052324829	3.2357691116451	5.29323925669242	Queen5	north_america	8.52900836833752	0.571178841075141	no
LOC105193219	whole_body_queen	28.2317681116945	18.9331758955989	14.945458785453	Queen3	north_america	33.8786346810519	-0.322025981288402	no
LOC105193219	whole_body_queen	28.2317681116945	11.8644867426987	8.46918281070788	Queen5	north_america	20.3336695534066	-0.442082066916816	no
LOC105193219	whole_body_queen	28.2317681116945	18.9560388938166	18.0822469042088	Queen2	north_america	37.0382857980255	-0.0645943298470952	no
LOC105193219	whole_body_queen	28.2317681116945	16.7405770270575	10.1444279102952	Queen6	north_america	26.8850049373527	-0.670730376282414	no
LOC105193219	whole_body_queen	28.2317681116945	11.7595035682417	9.79958630686813	Queen1	north_america	21.5590898751099	-0.240596150500072	no
LOC105193219	whole_body_queen	28.2317681116945	18.1218417629276	11.4566895231088	Queen4	north_america	29.5785312860364	-0.618300776246421	no
LOC105193220	whole_body_queen	73.469329052269	41.9663703983586	42.0078615847321	Queen4	north_america	83.9742319830908	0.00139249010053549	no
LOC105193220	whole_body_queen	73.469329052269	39.6353540507075	41.5891678796803	Queen2	north_america	81.2245219303878	0.0677510780066763	no
LOC105193220	whole_body_queen	73.469329052269	21.5590898751099	9.79958630686813	Queen1	north_america	31.358676181978	-1.06273281574739	no
LOC105193220	whole_body_queen	73.469329052269	35.973034201638	39.854556761208	Queen3	north_america	75.8275909628459	0.144023556513511	no
LOC105193220	whole_body_queen	73.469329052269	36.6200122466883	34.4910548950038	Queen6	north_america	71.1110671416921	-0.0840448624787666	no
LOC105193220	whole_body_queen	73.469329052269	28.0433323009242	21.1729570267697	Queen5	north_america	49.2162893276938	-0.389405807622398	no
LOC105193222	whole_body_queen	3.00752376915529	1.72327626307424	0.904112345210441	Queen2	north_america	2.62738860828468	-0.516224742049444	no
LOC105193222	whole_body_queen	3.00752376915529	0	2.93987589206044	Queen1	north_america	2.93987589206044	1.97815018482658	no
LOC105193222	whole_body_queen	3.00752376915529	0	1.05864785133848	Queen5	north_america	1.05864785133848	1.04169706621221	no
LOC105193222	whole_body_queen	3.00752376915529	1.04628606419109	2.02888558205905	Queen6	north_america	3.07517164625014	0.565779237210777	no
LOC105193222	whole_body_queen	3.00752376915529	2.83997638433984	0.996363919030199	Queen3	north_america	3.83634030337004	-0.943722703606935	no
LOC105193222	whole_body_queen	3.00752376915529	2.86134343625172	0.95472412692573	Queen4	north_america	3.81606756317746	-0.982137864170871	no
LOC105193223	whole_body_queen	15.3528504966503	5.16982878922272	7.23289876168353	Queen2	north_america	12.4027275509062	0.416170030059335	no
LOC105193223	whole_body_queen	15.3528504966503	6.62661156345962	3.9854556761208	Queen3	north_america	10.6120672395804	-0.613316848110642	no
LOC105193223	whole_body_queen	15.3528504966503	7.55012792717189	8.46918281070788	Queen5	north_america	16.0193107378798	0.147293920874283	no
LOC105193223	whole_body_queen	15.3528504966503	7.32400244933766	8.11554232823618	Queen6	north_america	15.4395447775738	0.131051102221877	no
LOC105193223	whole_body_queen	15.3528504966503	9.53781145417242	5.72834476155438	Queen4	north_america	15.2661562157268	-0.647251735358592	no
LOC105193223	whole_body_queen	15.3528504966503	11.7595035682417	8.81962767618131	Queen1	north_america	20.5791312444231	-0.377831970462038	no
LOC105193224	whole_body_queen	9.67058484353725	5.16982878922272	7.23289876168353	Queen2	north_america	12.4027275509062	0.416170030059335	no
LOC105193224	whole_body_queen	9.67058484353725	3.91983452274725	5.87975178412087	Queen1	north_america	9.79958630686813	0.483746722858358	no
LOC105193224	whole_body_queen	9.67058484353725	3.78663517911978	3.9854556761208	Queen3	north_america	7.77209085524058	0.0587135215696023	no
LOC105193224	whole_body_queen	9.67058484353725	6.47153822329019	6.35188710803091	Queen5	north_america	12.8234253313211	-0.0232906788858242	no
LOC105193224	whole_body_queen	9.67058484353725	5.72268687250345	3.81889650770292	Queen4	north_america	9.54158338020637	-0.480335136083497	no
LOC105193224	whole_body_queen	9.67058484353725	5.23143032095547	4.05777116411809	Queen6	north_america	9.28920148507357	-0.301061583268292	no
LOC105193225	whole_body_queen	0.966869888052027	0.86163813153712	0	Queen2	north_america	0.86163813153712	-0.896572666573614	no
LOC105193225	whole_body_queen	0.966869888052027	1.04628606419109	0	Queen6	north_america	1.04628606419109	-1.03300784329498	no
LOC105193225	whole_body_queen	0.966869888052027	0.979958630686813	0	Queen1	north_america	0.979958630686813	-0.985470286907669	no
LOC105193225	whole_body_queen	0.966869888052027	0.946658794779946	0	Queen3	north_america	0.946658794779946	-0.961000034434703	no
LOC105193225	whole_body_queen	0.966869888052027	1.0785897038817	0	Queen5	north_america	1.0785897038817	-1.05560501043652	no
LOC105193225	whole_body_queen	0.966869888052027	0.953781145417242	0	Queen4	north_america	0.953781145417242	-0.966268871551673	no
LOC105193226	whole_body_queen	0.988161274858506	0	0	Queen4	north_america	0	0	no
LOC105193226	whole_body_queen	0.988161274858506	0.86163813153712	0	Queen2	north_america	0.86163813153712	-0.896572666573614	no
LOC105193226	whole_body_queen	0.988161274858506	0	0.996363919030199	Queen3	north_america	0.996363919030199	0.997374734865391	no
LOC105193226	whole_body_queen	0.988161274858506	0	1.01444279102952	Queen6	north_america	1.01444279102952	1.01038083439196	no
LOC105193226	whole_body_queen	0.988161274858506	0	0.979958630686813	Queen1	north_america	0.979958630686813	0.985470286907668	no
LOC105193226	whole_body_queen	0.988161274858506	0	1.05864785133848	Queen5	north_america	1.05864785133848	1.04169706621221	no
LOC105193227	whole_body_queen	1.95146998759189	0.979958630686813	0.979958630686813	Queen1	north_america	1.95991726137363	0	no
LOC105193227	whole_body_queen	1.95146998759189	0	0.95472412692573	Queen4	north_america	0.95472412692573	0.966965012238482	no
LOC105193227	whole_body_queen	1.95146998759189	0.946658794779946	0.996363919030199	Queen3	north_america	1.94302271381015	0.0363747004306876	no
LOC105193227	whole_body_queen	1.95146998759189	1.0785897038817	1.05864785133848	Queen5	north_america	2.13723755522018	-0.0139079442243087	no
LOC105193227	whole_body_queen	1.95146998759189	1.04628606419109	1.01444279102952	Queen6	north_america	2.06072885522062	-0.0226270089030178	no
LOC105193227	whole_body_queen	1.95146998759189	0	0.904112345210441	Queen2	north_america	0.904112345210441	0.929118602120862	no
LOC105193228	whole_body_queen	12.7051838445815	5.72268687250345	5.72834476155438	Queen4	north_america	11.4510316340578	0.00121367775783272	no
LOC105193228	whole_body_queen	12.7051838445815	5.87975178412087	5.87975178412087	Queen1	north_america	11.7595035682417	0	no
LOC105193228	whole_body_queen	12.7051838445815	8.62871763105359	15.8797177700773	Queen5	north_america	24.5084354011309	0.809875206894263	no
LOC105193228	whole_body_queen	12.7051838445815	5.67995276867968	7.9709113522416	Queen3	north_america	13.6508641209213	0.425416653548056	no
LOC105193228	whole_body_queen	12.7051838445815	5.16982878922272	10.8493481425253	Queen2	north_america	16.019176931748	0.941505334912318	no
LOC105193228	whole_body_queen	12.7051838445815	2.09257212838219	1.01444279102952	Queen6	north_america	3.10701491941171	-0.618426409328933	no
LOC105193229	whole_body_queen	16.5540709447994	7.63024916333793	6.68306888848011	Queen4	north_america	14.313318051818	-0.167719522646452	no
LOC105193229	whole_body_queen	16.5540709447994	9.79958630686813	8.81962767618131	Queen1	north_america	18.6192139830494	-0.137235819961966	no
LOC105193229	whole_body_queen	16.5540709447994	7.57327035823957	7.9709113522416	Queen3	north_america	15.5441817104812	0.0654089160222752	no
LOC105193229	whole_body_queen	16.5540709447994	10.4628606419109	7.10109953720666	Queen6	north_america	17.5639601791176	-0.500777485337791	no
LOC105193229	whole_body_queen	16.5540709447994	12.9245719730568	13.5616851781566	Queen2	north_america	26.4862571512134	0.0645443424773822	no
LOC105193229	whole_body_queen	16.5540709447994	5.39294851940849	6.35188710803091	Queen5	north_america	11.7448356274394	0.201633137203501	no
LOC105193230	whole_body_queen	17.3060803940554	9.41657457771985	6.08665674617714	Queen6	north_america	15.503231323897	-0.555703858250398	no
LOC105193230	whole_body_queen	17.3060803940554	12.0629338415197	13.5616851781566	Queen2	north_america	25.6246190196763	0.156698371506039	no
LOC105193230	whole_body_queen	17.3060803940554	10.4915925995897	6.68306888848011	Queen4	north_america	17.1746614880698	-0.580824157983829	no
LOC105193230	whole_body_queen	17.3060803940554	9.79958630686813	8.81962767618131	Queen1	north_america	18.6192139830494	-0.137235819961966	no
LOC105193230	whole_body_queen	17.3060803940554	6.47153822329019	8.46918281070788	Queen5	north_america	14.9407210339981	0.34183463429805	no
LOC105193230	whole_body_queen	17.3060803940554	9.46658794779946	7.9709113522416	Queen3	north_america	17.4374993000411	-0.222464747307582	no
LOC105193231	whole_body_queen	19.7912237194792	6.27771638514657	10.1444279102952	Queen6	north_america	16.4221442954418	0.614764823861915	no
LOC105193231	whole_body_queen	19.7912237194792	10.785897038817	8.46918281070788	Queen5	north_america	19.2550798495249	-0.315749736247174	no
LOC105193231	whole_body_queen	19.7912237194792	8.81962767618131	12.7394621989286	Queen1	north_america	21.5590898751099	0.48458530508169	no
LOC105193231	whole_body_queen	19.7912237194792	11.3599055373594	17.9345505425436	Queen3	north_america	29.2944560799029	0.615353458517925	no
LOC105193231	whole_body_queen	19.7912237194792	9.47801944690832	10.8493481425253	Queen2	north_america	20.3273675894336	0.177441650905382	no
LOC105193231	whole_body_queen	19.7912237194792	5.72268687250345	7.63779301540584	Queen4	north_america	13.3604798879093	0.36162479245845	no
LOC105193804	whole_body_queen	1.9342112668583	0	0	Queen5	north_america	0	0	no
LOC105193804	whole_body_queen	1.9342112668583	0.946658794779946	0	Queen3	north_america	0.946658794779946	-0.961000034434703	no
LOC105193804	whole_body_queen	1.9342112668583	0.979958630686813	0.979958630686813	Queen1	north_america	1.95991726137363	0	no
LOC105193804	whole_body_queen	1.9342112668583	1.04628606419109	1.01444279102952	Queen6	north_america	2.06072885522062	-0.0226270089030178	no
LOC105193804	whole_body_queen	1.9342112668583	0.86163813153712	1.80822469042088	Queen2	north_america	2.669862821958	0.593085705958935	no
LOC105193804	whole_body_queen	1.9342112668583	0.953781145417242	0.95472412692573	Queen4	north_america	1.90850527234297	0.00069614068680925	no
LOC105193806	whole_body_queen	0.988161274858506	1.04628606419109	0	Queen6	north_america	1.04628606419109	-1.03300784329498	no
LOC105193806	whole_body_queen	0.988161274858506	0.979958630686813	0	Queen1	north_america	0.979958630686813	-0.985470286907669	no
LOC105193806	whole_body_queen	0.988161274858506	0	0.95472412692573	Queen4	north_america	0.95472412692573	0.966965012238482	no
LOC105193806	whole_body_queen	0.988161274858506	0	2.11729570267697	Queen5	north_america	2.11729570267697	1.64029501365793	no
LOC105193806	whole_body_queen	0.988161274858506	0	0.904112345210441	Queen2	north_america	0.904112345210441	0.929118602120862	no
LOC105193806	whole_body_queen	0.988161274858506	0	0.996363919030199	Queen3	north_america	0.996363919030199	0.997374734865391	no
LOC105193807	whole_body_queen	11.6117600799835	0.86163813153712	1.80822469042088	Queen2	north_america	2.669862821958	0.593085705958935	no
LOC105193807	whole_body_queen	11.6117600799835	0.979958630686813	0.979958630686813	Queen1	north_america	1.95991726137363	0	no
LOC105193807	whole_body_queen	11.6117600799835	16.0931995112591	19.927278380604	Queen3	north_america	36.0204778918631	0.291962232982813	no
LOC105193807	whole_body_queen	11.6117600799835	4.18514425676438	4.05777116411809	Queen6	north_america	8.24291542088247	-0.0358823624674825	no
LOC105193807	whole_body_queen	11.6117600799835	8.62871763105359	6.35188710803091	Queen5	north_america	14.9806047390845	-0.389229056809483	no
LOC105193807	whole_body_queen	11.6117600799835	11.4453737450069	7.63779301540584	Queen4	north_america	19.0831667604127	-0.526874905066218	no
LOC105193808	whole_body_queen	2.01032305829712	0.953781145417242	0.95472412692573	Queen4	north_america	1.90850527234297	0.00069614068680925	no
LOC105193808	whole_body_queen	2.01032305829712	1.89331758955989	0.996363919030199	Queen3	north_america	2.88968150859009	-0.535349956786319	no
LOC105193808	whole_body_queen	2.01032305829712	0	1.05864785133848	Queen5	north_america	1.05864785133848	1.04169706621221	no
LOC105193808	whole_body_queen	2.01032305829712	0.86163813153712	1.80822469042088	Queen2	north_america	2.669862821958	0.593085705958935	no
LOC105193808	whole_body_queen	2.01032305829712	1.04628606419109	1.01444279102952	Queen6	north_america	2.06072885522062	-0.0226270089030178	no
LOC105193808	whole_body_queen	2.01032305829712	0.979958630686813	0.979958630686813	Queen1	north_america	1.95991726137363	0	no
LOC105193811	whole_body_queen	2.03237084929894	2.93987589206044	0	Queen1	north_america	2.93987589206044	-1.97815018482658	no
LOC105193811	whole_body_queen	2.03237084929894	5.23143032095547	1.01444279102952	Queen6	north_america	6.245873111985	-1.62918251346538	no
LOC105193811	whole_body_queen	2.03237084929894	1.90756229083448	0	Queen4	north_america	1.90756229083448	-1.53981009994109	no
LOC105193811	whole_body_queen	2.03237084929894	2.1571794077634	0	Queen5	north_america	2.1571794077634	-1.65863624460286	no
LOC105193811	whole_body_queen	2.03237084929894	0.86163813153712	0.904112345210441	Queen2	north_america	1.76575047674756	0.0325459355472472	no
LOC105193811	whole_body_queen	2.03237084929894	1.89331758955989	0	Queen3	north_america	1.89331758955989	-1.53272469165171	no
LOC105193812	whole_body_queen	10.4157995501057	11.7595035682417	11.7595035682417	Queen1	north_america	23.5190071364835	0	no
LOC105193812	whole_body_queen	10.4157995501057	3.78663517911978	4.981819595151	Queen3	north_america	8.76845477427078	0.321572548087463	no
LOC105193812	whole_body_queen	10.4157995501057	4.18514425676438	7.10109953720666	Queen6	north_america	11.286243793971	0.643733606770217	no
LOC105193812	whole_body_queen	10.4157995501057	6.47153822329019	9.52783066204636	Queen5	north_america	15.9993688853366	0.494730991445791	no
LOC105193812	whole_body_queen	10.4157995501057	1.90756229083448	7.63779301540584	Queen4	north_america	9.54535530624033	1.5708526461911	no
LOC105193812	whole_body_queen	10.4157995501057	1.72327626307424	3.61644938084176	Queen2	north_america	5.339725643916	0.761440323477745	no
LOC105193814	whole_body_queen	13.0625882952995	13.6017188344842	6.08665674617714	Queen6	north_america	19.6883755806614	-1.04296112872651	no
LOC105193814	whole_body_queen	13.0625882952995	5.39294851940849	6.35188710803091	Queen5	north_america	11.7448356274394	0.201633137203501	no
LOC105193814	whole_body_queen	13.0625882952995	5.72268687250345	6.68306888848011	Queen4	north_america	12.4057557609836	0.192644735635941	no
LOC105193814	whole_body_queen	13.0625882952995	7.8396690454945	5.87975178412087	Queen1	north_america	13.7194208296154	-0.361635841970425	no
LOC105193814	whole_body_queen	13.0625882952995	4.73329397389973	5.9781835141812	Queen3	north_america	10.7114774880809	0.283487283487585	no
LOC105193814	whole_body_queen	13.0625882952995	8.6163813153712	8.13701110689397	Queen2	north_america	16.7533924222652	-0.0737717949239195	no
LOC105193815	whole_body_queen	25.480852025937	10.3396575784454	14.4657975233671	Queen2	north_america	24.8054551018125	0.447704154527653	no
LOC105193815	whole_body_queen	25.480852025937	8.58403030875517	15.2755860308117	Queen4	north_america	23.8596163395669	0.764005115414782	no
LOC105193815	whole_body_queen	25.480852025937	15.1002558543438	16.9383656214158	Queen5	north_america	32.0386214757595	0.15596483631334	no
LOC105193815	whole_body_queen	25.480852025937	14.1998819216992	11.9563670283624	Queen3	north_america	26.1562489500616	-0.230398873790117	no
LOC105193815	whole_body_queen	25.480852025937	17.7868630912486	19.2744130295609	Queen6	north_america	37.0612761208095	0.109935952171922	no
LOC105193815	whole_body_queen	25.480852025937	7.8396690454945	8.81962767618131	Queen1	north_america	16.6592967216758	0.151675967371404	no
LOC105193816	whole_body_queen	7.64504385497516	1.90756229083448	2.86417238077719	Queen4	north_america	4.77173467161168	0.410349354311585	no
LOC105193816	whole_body_queen	7.64504385497516	4.73329397389973	3.9854556761208	Queen3	north_america	8.71874965002053	-0.201638880372576	no
LOC105193816	whole_body_queen	7.64504385497516	2.58491439461136	2.71233703563132	Queen2	north_america	5.29725143024268	0.0503890270662438	no
LOC105193816	whole_body_queen	7.64504385497516	4.18514425676438	4.05777116411809	Queen6	north_america	8.24291542088247	-0.0358823624674825	no
LOC105193816	whole_body_queen	7.64504385497516	2.1571794077634	5.29323925669242	Queen5	north_america	7.45041866445582	0.995166547803712	no
LOC105193816	whole_body_queen	7.64504385497516	3.91983452274725	3.91983452274725	Queen1	north_america	7.8396690454945	0	no
LOC105193817	whole_body_queen	4.00375156903076	2.58491439461136	2.71233703563132	Queen2	north_america	5.29725143024268	0.0503890270662438	no
LOC105193817	whole_body_queen	4.00375156903076	1.95991726137363	0.979958630686813	Queen1	north_america	2.93987589206044	-0.58008656182687	no
LOC105193817	whole_body_queen	4.00375156903076	1.90756229083448	1.90944825385146	Queen4	north_america	3.81701054468594	0.000935487246009695	no
LOC105193817	whole_body_queen	4.00375156903076	2.09257212838219	2.02888558205905	Queen6	north_america	4.12145771044124	-0.0300201632151384	no
LOC105193817	whole_body_queen	4.00375156903076	1.89331758955989	1.9927278380604	Queen3	north_america	3.88604542762029	0.0487363928863094	no
LOC105193817	whole_body_queen	4.00375156903076	2.1571794077634	2.11729570267697	Queen5	north_america	4.27447511044037	-0.0183412309449293	no
LOC105193818	whole_body_queen	1.9342112668583	0.979958630686813	0.979958630686813	Queen1	north_america	1.95991726137363	0	no
LOC105193818	whole_body_queen	1.9342112668583	0.953781145417242	0.95472412692573	Queen4	north_america	1.90850527234297	0.00069614068680925	no
LOC105193818	whole_body_queen	1.9342112668583	0.86163813153712	0.904112345210441	Queen2	north_america	1.76575047674756	0.0325459355472472	no
LOC105193818	whole_body_queen	1.9342112668583	1.04628606419109	1.01444279102952	Queen6	north_america	2.06072885522062	-0.0226270089030178	no
LOC105193818	whole_body_queen	1.9342112668583	0	0.996363919030199	Queen3	north_america	0.996363919030199	0.997374734865391	no
LOC105193818	whole_body_queen	1.9342112668583	1.0785897038817	1.05864785133848	Queen5	north_america	2.13723755522018	-0.0139079442243087	no
LOC105193819	whole_body_queen	16.6221164637631	8.51992915301952	7.9709113522416	Queen3	north_america	16.4908405052611	-0.0856962815331333	no
LOC105193819	whole_body_queen	16.6221164637631	12.9430764465804	9.52783066204636	Queen5	north_america	22.4709071086267	-0.405340728418138	no
LOC105193819	whole_body_queen	16.6221164637631	8.6163813153712	8.13701110689397	Queen2	north_america	16.7533924222652	-0.0737717949239195	no
LOC105193819	whole_body_queen	16.6221164637631	4.18514425676438	5.07221395514762	Queen6	north_america	9.25735821191199	0.22783849811587	no
LOC105193819	whole_body_queen	16.6221164637631	6.85971041480769	8.81962767618131	Queen1	north_america	15.679338090989	0.32119216550224	no
LOC105193819	whole_body_queen	16.6221164637631	7.63024916333793	9.5472412692573	Queen4	north_america	17.1774904325952	0.289391580667435	no
LOC105193820	whole_body_queen	50.7062331527154	24.7983097808483	28.6417238077719	Queen4	north_america	53.4400335886202	0.200352801507763	no
LOC105193820	whole_body_queen	50.7062331527154	33.481154054115	18.2599702385314	Queen6	north_america	51.7411242926464	-0.840202587119619	no
LOC105193820	whole_body_queen	50.7062331527154	22.6503837815157	21.1729570267697	Queen5	north_america	43.8233408082854	-0.093062411249579	no
LOC105193820	whole_body_queen	50.7062331527154	21.7731522799388	27.8981897328456	Queen3	north_america	49.6713420127844	0.343645116493811	no
LOC105193820	whole_body_queen	50.7062331527154	27.4388416592308	27.4388416592308	Queen1	north_america	54.8776833184615	0	no
LOC105193820	whole_body_queen	50.7062331527154	20.6793151568909	27.1233703563132	Queen2	north_america	47.8026855132041	0.375450316887593	no
LOC105193821	whole_body_queen	33.4675587156026	26.4588830285439	29.3987589206044	Queen1	north_america	55.8576419491483	0.146739483688594	no
LOC105193821	whole_body_queen	33.4675587156026	13.7862101045939	17.1781345589984	Queen2	north_america	30.9643446635923	0.297951839131532	no
LOC105193821	whole_body_queen	33.4675587156026	15.2604983266759	15.2755860308117	Queen4	north_america	30.5360843574876	0.00133801948975975	no
LOC105193821	whole_body_queen	33.4675587156026	12.5554327702931	15.2166418654428	Queen6	north_america	27.772074635736	0.258603924529841	no
LOC105193821	whole_body_queen	33.4675587156026	17.039858306039	18.9309144615738	Queen3	north_america	35.9707727676128	0.143819897805663	no
LOC105193821	whole_body_queen	33.4675587156026	25.8861528931608	25.4075484321236	Queen5	north_america	51.2937013252844	-0.0259129626395241	no
LOC105193822	whole_body_queen	4.36631038513802	0.979958630686813	3.91983452274725	Queen1	north_america	4.89979315343406	1.31313950483027	no
LOC105193822	whole_body_queen	4.36631038513802	0.946658794779946	3.9854556761208	Queen3	north_america	4.93211447090074	1.35672534012562	no
LOC105193822	whole_body_queen	4.36631038513802	1.0785897038817	3.17594355401545	Queen5	north_america	4.25453325789715	1.00649720077866	no
LOC105193822	whole_body_queen	4.36631038513802	1.04628606419109	3.04332837308857	Queen6	north_america	4.08961443727966	0.982535531471878	no
LOC105193822	whole_body_queen	4.36631038513802	0.86163813153712	3.61644938084176	Queen2	north_america	4.47808751237888	1.31021100107444	no
LOC105193822	whole_body_queen	4.36631038513802	0.953781145417242	1.90944825385146	Queen4	north_america	2.8632293992687	0.574476715635429	no
LOC105193823	whole_body_queen	1.95146998759189	1.0785897038817	1.05864785133848	Queen5	north_america	2.13723755522018	-0.0139079442243087	no
LOC105193823	whole_body_queen	1.95146998759189	0.86163813153712	0	Queen2	north_america	0.86163813153712	-0.896572666573614	no
LOC105193823	whole_body_queen	1.95146998759189	0.953781145417242	0.95472412692573	Queen4	north_america	1.90850527234297	0.00069614068680925	no
LOC105193823	whole_body_queen	1.95146998759189	0.946658794779946	0.996363919030199	Queen3	north_america	1.94302271381015	0.0363747004306876	no
LOC105193823	whole_body_queen	1.95146998759189	1.04628606419109	1.01444279102952	Queen6	north_america	2.06072885522062	-0.0226270089030178	no
LOC105193823	whole_body_queen	1.95146998759189	0.979958630686813	0.979958630686813	Queen1	north_america	1.95991726137363	0	no
LOC105193824	whole_body_queen	5.80169081906641	18.0944007622795	17.1781345589984	Queen2	north_america	35.2725353212779	-0.0709454870161216	no
LOC105193824	whole_body_queen	5.80169081906641	3.91983452274725	1.95991726137363	Queen1	north_america	5.87975178412088	-0.733052943003404	no
LOC105193824	whole_body_queen	5.80169081906641	2.09257212838219	1.01444279102952	Queen6	north_america	3.10701491941171	-0.618426409328933	no
LOC105193824	whole_body_queen	5.80169081906641	4.76890572708621	0.95472412692573	Queen4	north_america	5.72362985401194	-1.56133267546686	no
LOC105193824	whole_body_queen	5.80169081906641	8.51992915301952	2.9890917570906	Queen3	north_america	11.5090209101101	-1.25489052840823	no
LOC105193824	whole_body_queen	5.80169081906641	1.0785897038817	1.05864785133848	Queen5	north_america	2.13723755522018	-0.0139079442243087	no
LOC105193825	whole_body_queen	20.3653908970895	22.7198110747187	7.9709113522416	Queen3	north_america	30.6907224269603	-1.40276605838046	na
LOC105193825	whole_body_queen	20.3653908970895	19.8176770253538	6.32878641647309	Queen2	north_america	26.1464634418268	-1.50616286667405	na
LOC105193825	whole_body_queen	20.3653908970895	12.7394621989286	0.979958630686813	Queen1	north_america	13.7194208296154	-2.79478334211215	na
LOC105193825	whole_body_queen	20.3653908970895	12.5554327702931	2.02888558205905	Queen6	north_america	14.5843183523522	-2.1620121877261	na
LOC105193825	whole_body_queen	20.3653908970895	10.785897038817	2.11729570267697	Queen5	north_america	12.903192741494	-1.91869464925338	na
LOC105193825	whole_body_queen	20.3653908970895	28.6134343625172	8.59251714233157	Queen4	north_america	37.2059515048488	-1.62627047095534	na
LOC105193826	whole_body_queen	2.36529583858931	0.979958630686813	0.979958630686813	Queen1	north_america	1.95991726137363	0	no
LOC105193826	whole_body_queen	2.36529583858931	0.946658794779946	1.9927278380604	Queen3	north_america	2.93938663284035	0.620461050103316	no
LOC105193826	whole_body_queen	2.36529583858931	2.1571794077634	1.05864785133848	Queen5	north_america	3.21582725910188	-0.616939178390645	no
LOC105193826	whole_body_queen	2.36529583858931	0.86163813153712	1.80822469042088	Queen2	north_america	2.669862821958	0.593085705958935	no
LOC105193826	whole_body_queen	2.36529583858931	0.953781145417242	0.95472412692573	Queen4	north_america	1.90850527234297	0.00069614068680925	no
LOC105193826	whole_body_queen	2.36529583858931	1.04628606419109	1.01444279102952	Queen6	north_america	2.06072885522062	-0.0226270089030178	no
LOC105193827	whole_body_queen	15.1026258356902	10.785897038817	10.5864785133848	Queen5	north_america	21.3723755522018	-0.0246194143842727	no
LOC105193827	whole_body_queen	15.1026258356902	3.44655252614848	8.13701110689397	Queen2	north_america	11.5835636330424	1.0390350810076	no
LOC105193827	whole_body_queen	15.1026258356902	8.37028851352876	8.11554232823618	Queen6	north_america	16.4858308417649	-0.0397649777015708	no
LOC105193827	whole_body_queen	15.1026258356902	19.8798346903789	23.9127340567248	Queen3	north_america	43.7925687471037	0.25477306947782	no
LOC105193827	whole_body_queen	15.1026258356902	3.81512458166897	7.63779301540584	Queen4	north_america	11.4529175970748	0.843089620746555	no
LOC105193827	whole_body_queen	15.1026258356902	6.85971041480769	6.85971041480769	Queen1	north_america	13.7194208296154	0	no
LOC105193828	whole_body_queen	8.70283362089723	0.953781145417242	3.81889650770292	Queen4	north_america	4.77267765312016	1.30243394603857	no
LOC105193828	whole_body_queen	8.70283362089723	7.57327035823957	1.9927278380604	Queen3	north_america	9.56599819629997	-1.5183845549936	no
LOC105193828	whole_body_queen	8.70283362089723	3.13885819257328	3.04332837308857	Queen6	north_america	6.18218656566185	-0.0336894443797355	no
LOC105193828	whole_body_queen	8.70283362089723	7.55012792717189	4.23459140535394	Queen5	north_america	11.7847193325258	-0.707869076174425	no
LOC105193828	whole_body_queen	8.70283362089723	3.44655252614848	9.04112345210441	Queen2	north_america	12.4876759782529	1.17516156129746	no
LOC105193828	whole_body_queen	8.70283362089723	2.93987589206044	4.89979315343406	Queen1	north_america	7.8396690454945	0.582514189690938	no
LOC105193829	whole_body_queen	25.1456894506664	10.4915925995897	14.320861903886	Queen4	north_america	24.8124545034756	0.414918708661205	no
LOC105193829	whole_body_queen	25.1456894506664	6.47153822329019	10.5864785133848	Queen5	north_america	17.058016736675	0.632964956160951	no
LOC105193829	whole_body_queen	25.1456894506664	12.7394621989286	12.7394621989286	Queen1	north_america	25.4789243978571	0	no
LOC105193829	whole_body_queen	25.1456894506664	12.9245719730568	14.4657975233671	Queen2	north_america	27.3903694964239	0.151448249375498	no
LOC105193829	whole_body_queen	25.1456894506664	14.1998819216992	15.9418227044832	Queen3	north_america	30.1417046261824	0.156528980616356	no
LOC105193829	whole_body_queen	25.1456894506664	10.4628606419109	14.2021990744133	Queen6	north_america	24.6650597163243	0.407312907567587	no
LOC105193830	whole_body_queen	6.83436859346247	2.83997638433984	2.9890917570906	Queen3	north_america	5.82906814143044	0.0549628702064705	no
LOC105193830	whole_body_queen	6.83436859346247	3.13885819257328	2.02888558205905	Queen6	north_america	5.16774377463233	-0.450445738640836	no
LOC105193830	whole_body_queen	6.83436859346247	2.93987589206044	4.89979315343406	Queen1	north_america	7.8396690454945	0.582514189690938	no
LOC105193830	whole_body_queen	6.83436859346247	3.81512458166897	1.90944825385146	Queen4	north_america	5.72457283552043	-0.726827538198531	no
LOC105193830	whole_body_queen	6.83436859346247	3.44655252614848	5.42467407126264	Queen2	north_america	8.87122659741112	0.53093603912722	no
LOC105193830	whole_body_queen	6.83436859346247	4.31435881552679	7.41053495936939	Queen5	north_america	11.7248937748962	0.662301928091297	no
LOC105193831	whole_body_queen	56.8263222497456	21.972007348013	38.5488260591219	Queen6	north_america	60.5208334071349	0.783757943030987	na
LOC105193831	whole_body_queen	56.8263222497456	20.8264934851588	42.8436485182986	Queen3	north_america	63.6701420034574	1.00628748530951	na
LOC105193831	whole_body_queen	56.8263222497456	20.6793151568909	28.9315950467341	Queen2	north_america	49.610910203625	0.465349978614399	na
LOC105193831	whole_body_queen	56.8263222497456	28.4188002899176	40.1783038581593	Queen1	north_america	68.5971041480769	0.485145992193134	na
LOC105193831	whole_body_queen	56.8263222497456	10.785897038817	42.3459140535394	Queen5	north_america	53.1318110923564	1.87883443805248	na
LOC105193831	whole_body_queen	56.8263222497456	16.2142794720931	35.324792696252	Queen4	north_america	51.5390721683451	1.07734876835509	na
LOC105193832	whole_body_queen	10.5653678172181	5.72268687250345	5.72834476155438	Queen4	north_america	11.4510316340578	0.00121367775783272	no
LOC105193832	whole_body_queen	10.5653678172181	8.6163813153712	1.80822469042088	Queen2	north_america	10.4246060057921	-1.7758357313876	no
LOC105193832	whole_body_queen	10.5653678172181	6.27771638514657	4.05777116411809	Queen6	north_america	10.3354875492647	-0.524984065415039	no
LOC105193832	whole_body_queen	10.5653678172181	6.47153822329019	4.23459140535394	Queen5	north_america	10.7061296286441	-0.513328362750658	no
LOC105193832	whole_body_queen	10.5653678172181	5.87975178412087	3.91983452274725	Queen1	north_america	9.79958630686813	-0.483746722858358	no
LOC105193832	whole_body_queen	10.5653678172181	9.46658794779946	5.9781835141812	Queen3	north_america	15.4447714619807	-0.584867764440996	no
LOC105193833	whole_body_queen	32.9944246876594	0.86163813153712	1.80822469042088	Queen2	north_america	2.669862821958	0.593085705958935	no
LOC105193833	whole_body_queen	32.9944246876594	13.6017188344842	18.2599702385314	Queen6	north_america	31.8616890730156	0.399467268586936	no
LOC105193833	whole_body_queen	32.9944246876594	10.785897038817	16.9383656214158	Queen5	north_america	27.7242626602327	0.605986883142329	no
LOC105193833	whole_body_queen	32.9944246876594	19.0756229083448	15.2755860308117	Queen4	north_america	34.3512089391565	-0.302735261443678	no
LOC105193833	whole_body_queen	32.9944246876594	14.1998819216992	19.927278380604	Queen3	north_america	34.1271603023032	0.461324583128322	no
LOC105193833	whole_body_queen	32.9944246876594	35.2785107047252	27.4388416592308	Queen1	north_america	62.717352363956	-0.351252528140676	no
LOC105193834	whole_body_queen	19.8143273646564	10.4132467425794	4.981819595151	Queen3	north_america	15.3950663377304	-0.932052949337146	no
LOC105193834	whole_body_queen	19.8143273646564	10.785897038817	12.7037742160618	Queen5	north_america	23.4896712548788	0.217511718804577	no
LOC105193834	whole_body_queen	19.8143273646564	8.37028851352876	12.1733134923543	Queen6	north_america	20.543602005883	0.491452898666306	no
LOC105193834	whole_body_queen	19.8143273646564	11.7595035682417	14.6993794603022	Queen1	north_america	26.4588830285439	0.299135336213176	no
LOC105193834	whole_body_queen	19.8143273646564	8.6163813153712	4.5205617260522	Queen2	north_america	13.1369430414234	-0.800679032902439	no
LOC105193834	whole_body_queen	19.8143273646564	9.53781145417242	9.5472412692573	Queen4	north_america	19.0850527234297	0.00129042583340202	no
LOC105193835	whole_body_queen	11.5354815632484	7.55012792717189	4.23459140535394	Queen5	north_america	11.7847193325258	-0.707869076174425	no
LOC105193835	whole_body_queen	11.5354815632484	0	0.904112345210441	Queen2	north_america	0.904112345210441	0.929118602120862	no
LOC105193835	whole_body_queen	11.5354815632484	8.51992915301952	4.981819595151	Queen3	north_america	13.5017487481705	-0.670366436008847	no
LOC105193835	whole_body_queen	11.5354815632484	4.18514425676438	7.10109953720666	Queen6	north_america	11.286243793971	0.643733606770217	no
LOC105193835	whole_body_queen	11.5354815632484	1.90756229083448	7.63779301540584	Queen4	north_america	9.54535530624033	1.5708526461911	no
LOC105193835	whole_body_queen	11.5354815632484	8.81962767618131	9.79958630686813	Queen1	north_america	18.6192139830494	0.137235819961966	no
LOC105193837	whole_body_queen	38.6277561533046	20.9257212838219	18.2599702385314	Queen6	north_america	39.1856915223533	-0.187018829494481	no
LOC105193837	whole_body_queen	38.6277561533046	16.3711244992053	21.6986962850506	Queen2	north_america	38.0698207842559	0.38591828950292	no
LOC105193837	whole_body_queen	38.6277561533046	16.0931995112591	19.927278380604	Queen3	north_america	36.0204778918631	0.291962232982813	no
LOC105193837	whole_body_queen	38.6277561533046	16.2142794720931	15.2755860308117	Queen4	north_america	31.4898655029048	-0.080896305066251	no
LOC105193837	whole_body_queen	38.6277561533046	17.6392553523626	35.2785107047252	Queen1	north_america	52.9177660570879	0.960771007218644	no
LOC105193837	whole_body_queen	38.6277561533046	12.9430764465804	30.7007876888161	Queen5	north_america	43.6438641353964	1.18496977099144	no
LOC105193839	whole_body_queen	10.2798952003796	2.93987589206044	0.979958630686813	Queen1	north_america	3.91983452274725	-0.992679897918909	no
LOC105193839	whole_body_queen	10.2798952003796	20.4932043737523	11.6451263647233	Queen5	north_america	32.1383307384756	-0.765299132826505	no
LOC105193839	whole_body_queen	10.2798952003796	5.67995276867968	10.9600031093322	Queen3	north_america	16.6399558780119	0.840307957485898	no
LOC105193839	whole_body_queen	10.2798952003796	1.04628606419109	0	Queen6	north_america	1.04628606419109	-1.03300784329498	no
LOC105193839	whole_body_queen	10.2798952003796	0.86163813153712	0.904112345210441	Queen2	north_america	1.76575047674756	0.0325459355472472	no
LOC105193839	whole_body_queen	10.2798952003796	15.2604983266759	13.3661377769602	Queen4	north_america	28.6266361036361	-0.17869921486477	no
LOC105193871	whole_body_queen	24.1211101793815	6.62661156345962	10.9600031093322	Queen3	north_america	17.5866146727918	0.649103636820776	no
LOC105193871	whole_body_queen	24.1211101793815	14.6993794603022	14.6993794603022	Queen1	north_america	29.3987589206044	0	no
LOC105193871	whole_body_queen	24.1211101793815	13.7862101045939	14.4657975233671	Queen2	north_america	28.252007627961	0.0648289121035317	no
LOC105193871	whole_body_queen	24.1211101793815	8.62871763105359	14.8210699187388	Queen5	north_america	23.4497875497924	0.716431591681688	no
LOC105193871	whole_body_queen	24.1211101793815	8.58403030875517	10.501965396183	Queen4	north_america	19.0859957049382	0.263176026820908	no
LOC105193871	whole_body_queen	24.1211101793815	14.6480048986753	10.1444279102952	Queen6	north_america	24.7924328089706	-0.489656168066107	no
LOC105193872	whole_body_queen	1.4859536467208	1.0785897038817	0	Queen5	north_america	1.0785897038817	-1.05560501043652	no
LOC105193872	whole_body_queen	1.4859536467208	0.86163813153712	0	Queen2	north_america	0.86163813153712	-0.896572666573614	no
LOC105193872	whole_body_queen	1.4859536467208	1.90756229083448	1.90944825385146	Queen4	north_america	3.81701054468594	0.000935487246009695	no
LOC105193872	whole_body_queen	1.4859536467208	0.979958630686813	0.979958630686813	Queen1	north_america	1.95991726137363	0	no
LOC105193872	whole_body_queen	1.4859536467208	1.04628606419109	0	Queen6	north_america	1.04628606419109	-1.03300784329498	no
LOC105193872	whole_body_queen	1.4859536467208	1.89331758955989	0	Queen3	north_america	1.89331758955989	-1.53272469165171	no
LOC105193873	whole_body_queen	2.41157333032116	0	0.904112345210441	Queen2	north_america	0.904112345210441	0.929118602120862	no
LOC105193873	whole_body_queen	2.41157333032116	1.95991726137363	0	Queen1	north_america	1.95991726137363	-1.56555684873454	no
LOC105193873	whole_body_queen	2.41157333032116	0.946658794779946	1.9927278380604	Queen3	north_america	2.93938663284035	0.620461050103316	no
LOC105193873	whole_body_queen	2.41157333032116	0.953781145417242	1.90944825385146	Queen4	north_america	2.8632293992687	0.574476715635429	no
LOC105193873	whole_body_queen	2.41157333032116	3.13885819257328	3.04332837308857	Queen6	north_america	6.18218656566185	-0.0336894443797355	no
LOC105193873	whole_body_queen	2.41157333032116	1.0785897038817	0	Queen5	north_america	1.0785897038817	-1.05560501043652	no
LOC105194381	whole_body_queen	23.8813615243799	15.5094863676682	13.5616851781566	Queen2	north_america	29.0711715458248	-0.181117912995133	no
LOC105194381	whole_body_queen	23.8813615243799	13.2532231269192	10.9600031093322	Queen3	north_america	24.2132262362514	-0.253070432808053	no
LOC105194381	whole_body_queen	23.8813615243799	11.7595035682417	6.85971041480769	Queen1	north_america	18.6192139830494	-0.699024135964278	no
LOC105194381	whole_body_queen	23.8813615243799	13.3529360358414	9.5472412692573	Queen4	north_america	22.9001773050987	-0.444480186975265	no
LOC105194381	whole_body_queen	23.8813615243799	14.0216661504621	9.52783066204636	Queen5	north_america	23.5494968125084	-0.512836651470712	no
LOC105194381	whole_body_queen	23.8813615243799	13.6017188344842	11.1588707013248	Queen6	north_america	24.760589535809	-0.264128965738254	no
LOC105194416	whole_body_queen	37.100433739324	18.9560388938166	18.9863592494193	Queen2	north_america	37.9423981432359	0.00219030589556135	no
LOC105194416	whole_body_queen	37.100433739324	29.2960097973506	23.332184193679	Queen6	north_america	52.6281939910297	-0.316261962375868	no
LOC105194416	whole_body_queen	37.100433739324	22.8907474900138	17.1850342846631	Queen4	north_america	40.0757817746769	-0.39370034757758	no
LOC105194416	whole_body_queen	37.100433739324	15.1002558543438	17.9970134727542	Queen5	north_america	33.097269327098	0.238689014929009	no
LOC105194416	whole_body_queen	37.100433739324	18.9331758955989	15.9418227044832	Queen3	north_america	34.8749986000821	-0.234582492002475	no
LOC105194416	whole_body_queen	37.100433739324	18.6192139830494	17.6392553523626	Queen1	north_america	36.2584693354121	-0.07392301836302	no
LOC105194425	whole_body_queen	3.01621006508958	0.953781145417242	3.81889650770292	Queen4	north_america	4.77267765312016	1.30243394603857	no
LOC105194425	whole_body_queen	3.01621006508958	0.86163813153712	2.71233703563132	Queen2	north_america	3.57397516716844	0.99575502922616	no
LOC105194425	whole_body_queen	3.01621006508958	0	3.04332837308857	Queen6	north_america	3.04332837308857	2.01554337476686	no
LOC105194425	whole_body_queen	3.01621006508958	0.979958630686813	1.95991726137363	Queen1	north_america	2.93987589206044	0.580086561826869	no
LOC105194425	whole_body_queen	3.01621006508958	0	2.9890917570906	Queen3	north_america	2.9890917570906	1.9960603086788	no
LOC105194425	whole_body_queen	3.01621006508958	0	2.11729570267697	Queen5	north_america	2.11729570267697	1.64029501365793	no
LOC105194434	whole_body_queen	35.7616497307534	30.2930814329583	4.981819595151	Queen3	north_america	35.2749010281093	-2.38718742171249	na
LOC105194434	whole_body_queen	35.7616497307534	32.3386348126648	4.89979315343406	Queen1	north_america	37.2384279660989	-2.49845874882965	na
LOC105194434	whole_body_queen	35.7616497307534	27.2034376689685	5.07221395514762	Queen6	north_america	32.2756516241161	-2.21557649069746	na
LOC105194434	whole_body_queen	35.7616497307534	30.1573346037992	6.32878641647309	Queen2	north_america	36.4861210202723	-2.08792559593428	na
LOC105194434	whole_body_queen	35.7616497307534	19.4146146698706	2.11729570267697	Queen5	north_america	21.5319103725475	-2.7112354178783	na
LOC105194434	whole_body_queen	35.7616497307534	31.474777798769	4.77362063462865	Queen4	north_america	36.2483984333976	-2.4917714332791	na
LOC105194441	whole_body_queen	6.92402546409766	4.18514425676438	2.02888558205905	Queen6	north_america	6.21402983882342	-0.775597046550775	no
LOC105194441	whole_body_queen	6.92402546409766	4.31435881552679	1.05864785133848	Queen5	north_america	5.37300666686528	-1.36819857296452	no
LOC105194441	whole_body_queen	6.92402546409766	3.44655252614848	0.904112345210441	Queen2	north_america	4.35066487135892	-1.22356862586776	no
LOC105194441	whole_body_queen	6.92402546409766	3.81512458166897	3.81889650770292	Queen4	north_america	7.63402108937189	0.00112969220460692	no
LOC105194441	whole_body_queen	6.92402546409766	8.51992915301952	0.996363919030199	Queen3	north_america	9.51629307204972	-2.25357610222164	no
LOC105194441	whole_body_queen	6.92402546409766	7.8396690454945	0.979958630686813	Queen1	north_america	8.81962767618131	-2.15852206965906	no
LOC105194453	whole_body_queen	30.5653455732584	17.1680606175103	15.2755860308117	Queen4	north_america	32.443646648322	-0.158694933626788	no
LOC105194453	whole_body_queen	30.5653455732584	15.1465407164791	21.9200062186644	Queen3	north_america	37.0665469351435	0.505382324834389	no
LOC105194453	whole_body_queen	30.5653455732584	15.1002558543438	10.5864785133848	Queen5	north_america	25.6867343677286	-0.474641461213262	no
LOC105194453	whole_body_queen	30.5653455732584	13.7194208296154	16.6592967216758	Queen1	north_america	30.3787175512912	0.262706982792011	no
LOC105194453	whole_body_queen	30.5653455732584	11.509146706102	14.2021990744133	Queen6	north_america	25.7113457805154	0.281296650403463	no
LOC105194453	whole_body_queen	30.5653455732584	18.0944007622795	12.6575728329462	Queen2	north_america	30.7519735952257	-0.483448528069	no
LOC105194461	whole_body_queen	7.39940358645085	2.1571794077634	2.11729570267697	Queen5	north_america	4.27447511044037	-0.0183412309449293	no
LOC105194461	whole_body_queen	7.39940358645085	2.09257212838219	5.07221395514762	Queen6	north_america	7.1647860835298	0.973415381451508	no
LOC105194461	whole_body_queen	7.39940358645085	3.44655252614848	3.61644938084176	Queen2	north_america	7.06300190699024	0.0540964396594278	no
LOC105194461	whole_body_queen	7.39940358645085	5.87975178412087	4.89979315343406	Queen1	north_america	10.7795449375549	-0.221692140078784	no
LOC105194461	whole_body_queen	7.39940358645085	3.81512458166897	3.81889650770292	Queen4	north_america	7.63402108937189	0.00112969220460692	no
LOC105194461	whole_body_queen	7.39940358645085	5.67995276867968	1.9927278380604	Queen3	north_america	7.67268060674008	-1.15837681746782	no
LOC105194481	whole_body_queen	141.662525784508	85.1992915301952	49.81819595151	Queen3	north_america	135.017487481705	-0.762330851334472	na
LOC105194481	whole_body_queen	141.662525784508	85.2564008697527	57.8175592105219	Queen1	north_america	143.073960080275	-0.55238460246952	na
LOC105194481	whole_body_queen	141.662525784508	79.270708101415	45.205617260522	Queen2	north_america	124.476325361937	-0.796805372173941	na
LOC105194481	whole_body_queen	141.662525784508	92.0731736488163	64.9243386258895	Queen6	north_america	156.997512274706	-0.497554209134125	na
LOC105194481	whole_body_queen	141.662525784508	94.4243333963069	45.8267580924351	Queen4	north_america	140.251091488742	-1.02702404236281	na
LOC105194481	whole_body_queen	141.662525784508	99.2302527571162	55.0496882696012	Queen5	north_america	154.279941026717	-0.838539772290427	na
LOC105194487	whole_body_queen	3.73848159956809	1.0785897038817	1.05864785133848	Queen5	north_america	2.13723755522018	-0.0139079442243087	no
LOC105194487	whole_body_queen	3.73848159956809	0.979958630686813	0	Queen1	north_america	0.979958630686813	-0.985470286907669	no
LOC105194487	whole_body_queen	3.73848159956809	1.90756229083448	3.81889650770292	Queen4	north_america	5.7264587985374	0.728892717649147	no
LOC105194487	whole_body_queen	3.73848159956809	1.72327626307424	3.61644938084176	Queen2	north_america	5.339725643916	0.761440323477745	no
LOC105194487	whole_body_queen	3.73848159956809	0.946658794779946	0.996363919030199	Queen3	north_america	1.94302271381015	0.0363747004306876	no
LOC105194487	whole_body_queen	3.73848159956809	25.1108655405863	30.4332837308857	Queen6	north_america	55.544149271472	0.267642711702997	no
LOC105194495	whole_body_queen	14.9217320288178	0.979958630686813	0.979958630686813	Queen1	north_america	1.95991726137363	0	no
LOC105194495	whole_body_queen	14.9217320288178	2.83997638433984	2.9890917570906	Queen3	north_america	5.82906814143044	0.0549628702064705	no
LOC105194495	whole_body_queen	14.9217320288178	10.3396575784454	9.04112345210441	Queen2	north_america	19.3807810305498	-0.17545638174233	no
LOC105194495	whole_body_queen	14.9217320288178	17.1680606175103	1.90944825385146	Queen4	north_america	19.0775088713618	-2.64258693239995	no
LOC105194495	whole_body_queen	14.9217320288178	9.70730733493528	1.05864785133848	Queen5	north_america	10.7659551862738	-2.37882674658268	no
LOC105194495	whole_body_queen	14.9217320288178	30.3422958615417	14.2021990744133	Queen6	north_america	44.5444949359551	-1.0438308310144	no
LOC105194501	whole_body_queen	12.2227461554014	31.8806108668734	6.32878641647309	Queen2	north_america	38.2093972833465	-2.16559087668326	na
LOC105194501	whole_body_queen	12.2227461554014	19.8798346903789	1.9927278380604	Queen3	north_america	21.8725625284393	-2.80257730021142	na
LOC105194501	whole_body_queen	12.2227461554014	2.86134343625172	0.95472412692573	Queen4	north_america	3.81606756317746	-0.982137864170871	na
LOC105194501	whole_body_queen	12.2227461554014	10.7795449375549	2.93987589206044	Queen1	north_america	13.7194208296154	-1.58006171671526	na
LOC105194501	whole_body_queen	12.2227461554014	0	2.02888558205905	Queen6	north_america	2.02888558205905	1.59878708050576	na
LOC105194501	whole_body_queen	12.2227461554014	7.55012792717189	3.17594355401545	Queen5	north_america	10.7260714811873	-1.03384379457467	na
LOC105194510	whole_body_queen	1.83712787454527	0.86163813153712	0.904112345210441	Queen2	north_america	1.76575047674756	0.0325459355472472	no
LOC105194510	whole_body_queen	1.83712787454527	0.953781145417242	0.95472412692573	Queen4	north_america	1.90850527234297	0.00069614068680925	no
LOC105194510	whole_body_queen	1.83712787454527	0	1.05864785133848	Queen5	north_america	1.05864785133848	1.04169706621221	no
LOC105194510	whole_body_queen	1.83712787454527	0	0.996363919030199	Queen3	north_america	0.996363919030199	0.997374734865391	no
LOC105194510	whole_body_queen	1.83712787454527	1.04628606419109	1.01444279102952	Queen6	north_america	2.06072885522062	-0.0226270089030178	no
LOC105194510	whole_body_queen	1.83712787454527	0.979958630686813	0.979958630686813	Queen1	north_america	1.95991726137363	0	no
LOC105194522	whole_body_queen	4.52310489102602	0.946658794779946	1.9927278380604	Queen3	north_america	2.93938663284035	0.620461050103316	no
LOC105194522	whole_body_queen	4.52310489102602	2.1571794077634	2.11729570267697	Queen5	north_america	4.27447511044037	-0.0183412309449293	no
LOC105194522	whole_body_queen	4.52310489102602	4.89979315343406	5.87975178412087	Queen1	north_america	10.7795449375549	0.221692140078784	no
LOC105194522	whole_body_queen	4.52310489102602	4.18514425676438	2.02888558205905	Queen6	north_america	6.21402983882342	-0.775597046550775	no
LOC105194522	whole_body_queen	4.52310489102602	1.90756229083448	2.86417238077719	Queen4	north_america	4.77173467161168	0.410349354311585	no
LOC105194522	whole_body_queen	4.52310489102602	1.72327626307424	1.80822469042088	Queen2	north_america	3.53150095349512	0.0443150283622435	no
LOC105194585	whole_body_queen	20.6392256857665	9.46658794779946	13.9490948664228	Queen3	north_america	23.4156828142223	0.514266927201443	no
LOC105194585	whole_body_queen	20.6392256857665	10.4915925995897	10.501965396183	Queen4	north_america	20.9935579957727	0.0013016500728869	no
LOC105194585	whole_body_queen	20.6392256857665	9.41657457771985	9.12998511926571	Queen6	north_america	18.5465596969856	-0.040248879943521	no
LOC105194585	whole_body_queen	20.6392256857665	9.70730733493528	8.46918281070788	Queen5	north_america	18.1764901456432	-0.177283886130756	no
LOC105194585	whole_body_queen	20.6392256857665	10.3396575784454	9.94523579731485	Queen2	north_america	20.2848933757603	-0.0510740407676953	no
LOC105194585	whole_body_queen	20.6392256857665	10.7795449375549	11.7595035682417	Queen1	north_america	22.5390485057967	0.115288392858332	no
LOC105194601	whole_body_queen	0.988161274858506	0	0.996363919030199	Queen3	north_america	0.996363919030199	0.997374734865391	no
LOC105194601	whole_body_queen	0.988161274858506	0	0.979958630686813	Queen1	north_america	0.979958630686813	0.985470286907668	no
LOC105194601	whole_body_queen	0.988161274858506	0	0.904112345210441	Queen2	north_america	0.904112345210441	0.929118602120862	no
LOC105194601	whole_body_queen	0.988161274858506	0	2.11729570267697	Queen5	north_america	2.11729570267697	1.64029501365793	no
LOC105194601	whole_body_queen	0.988161274858506	0	1.01444279102952	Queen6	north_america	1.01444279102952	1.01038083439196	no
LOC105194601	whole_body_queen	0.988161274858506	0	0	Queen4	north_america	0	0	no
LOC105194616	whole_body_queen	1.46149067224848	1.04628606419109	1.01444279102952	Queen6	north_america	2.06072885522062	-0.0226270089030178	no
LOC105194616	whole_body_queen	1.46149067224848	0.946658794779946	0.996363919030199	Queen3	north_america	1.94302271381015	0.0363747004306876	no
LOC105194616	whole_body_queen	1.46149067224848	0.953781145417242	0	Queen4	north_america	0.953781145417242	-0.966268871551673	no
LOC105194616	whole_body_queen	1.46149067224848	1.0785897038817	1.05864785133848	Queen5	north_america	2.13723755522018	-0.0139079442243087	no
LOC105194616	whole_body_queen	1.46149067224848	0	0.904112345210441	Queen2	north_america	0.904112345210441	0.929118602120862	no
LOC105194616	whole_body_queen	1.46149067224848	0.979958630686813	0	Queen1	north_america	0.979958630686813	-0.985470286907669	no
LOC105194663	whole_body_queen	29.8668601733916	17.039858306039	13.9490948664228	Queen3	north_america	30.9889531724618	-0.271129871822524	no
LOC105194663	whole_body_queen	29.8668601733916	15.1002558543438	10.5864785133848	Queen5	north_america	25.6867343677286	-0.474641461213262	no
LOC105194663	whole_body_queen	29.8668601733916	15.2604983266759	11.4566895231088	Queen4	north_america	26.7171878497846	-0.384450761421173	no
LOC105194663	whole_body_queen	29.8668601733916	18.9560388938166	10.8493481425253	Queen2	north_america	29.8053870363419	-0.752017690609226	no
LOC105194663	whole_body_queen	29.8668601733916	15.679338090989	16.6592967216758	Queen1	north_america	32.3386348126648	0.0823658515833089	no
LOC105194663	whole_body_queen	29.8668601733916	16.7405770270575	13.1877562833838	Queen6	north_america	29.9283333104413	-0.322406482210639	no
LOC105194672	whole_body_queen	58.029267750288	31.474777798769	29.5964479346976	Queen4	north_america	61.0712257334666	-0.0859554800553213	no
LOC105194672	whole_body_queen	58.029267750288	22.6503837815157	29.6421398374776	Queen5	north_america	52.2925236189932	0.373653453957462	no
LOC105194672	whole_body_queen	58.029267750288	29.3464226381783	28.8945536518758	Queen3	north_america	58.2409762900541	-0.0216437851065796	no
LOC105194672	whole_body_queen	58.029267750288	32.7422489984106	31.6439320823654	Queen2	north_america	64.386181080776	-0.0477412900385691	no
LOC105194672	whole_body_queen	58.029267750288	35.2785107047252	22.5390485057967	Queen1	north_america	57.8175592105219	-0.624059226958229	no
LOC105194672	whole_body_queen	58.029267750288	27.2034376689685	23.332184193679	Queen6	north_america	50.5356218626475	-0.213005190473791	no
LOC105194675	whole_body_queen	27.229652587688	15.1465407164791	13.9490948664228	Queen3	north_america	29.0956355829019	-0.111166975517465	no
LOC105194675	whole_body_queen	27.229652587688	13.3529360358414	13.3661377769602	Queen4	north_america	26.7190738128016	0.00132637200690749	no
LOC105194675	whole_body_queen	27.229652587688	11.509146706102	16.2310846564724	Queen6	north_america	27.7402313625744	0.462030137258039	no
LOC105194675	whole_body_queen	27.229652587688	12.0629338415197	18.0822469042088	Queen2	north_america	30.1451807457285	0.546752104126335	no
LOC105194675	whole_body_queen	27.229652587688	11.7595035682417	9.79958630686813	Queen1	north_america	21.5590898751099	-0.240596150500072	no
LOC105194675	whole_body_queen	27.229652587688	10.785897038817	10.5864785133848	Queen5	north_america	21.3723755522018	-0.0246194143842727	no
LOC105194680	whole_body_queen	3.02320077612603	0.946658794779946	1.9927278380604	Queen3	north_america	2.93938663284035	0.620461050103316	no
LOC105194680	whole_body_queen	3.02320077612603	1.72327626307424	0.904112345210441	Queen2	north_america	2.62738860828468	-0.516224742049444	no
LOC105194680	whole_body_queen	3.02320077612603	3.2357691116451	3.17594355401545	Queen5	north_america	6.41171266566055	-0.0205217401162448	no
LOC105194680	whole_body_queen	3.02320077612603	1.90756229083448	1.90944825385146	Queen4	north_america	3.81701054468594	0.000935487246009695	no
LOC105194680	whole_body_queen	3.02320077612603	0.979958630686813	0.979958630686813	Queen1	north_america	1.95991726137363	0	no
LOC105194680	whole_body_queen	3.02320077612603	2.09257212838219	1.01444279102952	Queen6	north_america	3.10701491941171	-0.618426409328933	no
LOC105194690	whole_body_queen	13.2908258382509	5.72268687250345	5.72834476155438	Queen4	north_america	11.4510316340578	0.00121367775783272	no
LOC105194690	whole_body_queen	13.2908258382509	5.67995276867968	8.9672752712718	Queen3	north_america	14.6472280399515	0.577361270634456	no
LOC105194690	whole_body_queen	13.2908258382509	5.16982878922272	7.23289876168353	Queen2	north_america	12.4027275509062	0.416170030059335	no
LOC105194690	whole_body_queen	13.2908258382509	5.23143032095547	12.1733134923543	Queen6	north_america	17.4047438133098	1.07998302031873	no
LOC105194690	whole_body_queen	13.2908258382509	3.91983452274725	8.81962767618131	Queen1	north_america	12.7394621989286	0.997058532200187	no
LOC105194690	whole_body_queen	13.2908258382509	4.31435881552679	9.52783066204636	Queen5	north_america	13.8421894775732	0.986240644635144	no
LOC105194700	whole_body_queen	0.920798381111966	0	1.01444279102952	Queen6	north_america	1.01444279102952	1.01038083439196	no
LOC105194700	whole_body_queen	0.920798381111966	0.979958630686813	0	Queen1	north_america	0.979958630686813	-0.985470286907669	no
LOC105194700	whole_body_queen	0.920798381111966	1.0785897038817	0	Queen5	north_america	1.0785897038817	-1.05560501043652	no
LOC105194700	whole_body_queen	0.920798381111966	0	0	Queen3	north_america	0	0	no
LOC105194700	whole_body_queen	0.920798381111966	0	0	Queen4	north_america	0	0	no
LOC105194700	whole_body_queen	0.920798381111966	0.86163813153712	0	Queen2	north_america	0.86163813153712	-0.896572666573614	no
LOC105194738	whole_body_queen	2.0989832052204	1.72327626307424	0.904112345210441	Queen2	north_america	2.62738860828468	-0.516224742049444	no
LOC105194738	whole_body_queen	2.0989832052204	1.04628606419109	1.01444279102952	Queen6	north_america	2.06072885522062	-0.0226270089030178	no
LOC105194738	whole_body_queen	2.0989832052204	1.0785897038817	1.05864785133848	Queen5	north_america	2.13723755522018	-0.0139079442243087	no
LOC105194738	whole_body_queen	2.0989832052204	0.979958630686813	0.979958630686813	Queen1	north_america	1.95991726137363	0	no
LOC105194738	whole_body_queen	2.0989832052204	1.89331758955989	1.9927278380604	Queen3	north_america	3.88604542762029	0.0487363928863094	no
LOC105194738	whole_body_queen	2.0989832052204	0.953781145417242	0.95472412692573	Queen4	north_america	1.90850527234297	0.00069614068680925	no
LOC105194763	whole_body_queen	10.2053375140042	1.04628606419109	1.01444279102952	Queen6	north_america	2.06072885522062	-0.0226270089030178	no
LOC105194763	whole_body_queen	10.2053375140042	1.95991726137363	1.95991726137363	Queen1	north_america	3.91983452274725	0	no
LOC105194763	whole_body_queen	10.2053375140042	15.2604983266759	13.3661377769602	Queen4	north_america	28.6266361036361	-0.17869921486477	no
LOC105194763	whole_body_queen	10.2053375140042	17.2327626307424	18.9863592494193	Queen2	north_america	36.2191218801617	0.132482516839609	no
LOC105194763	whole_body_queen	10.2053375140042	1.0785897038817	1.05864785133848	Queen5	north_america	2.13723755522018	-0.0139079442243087	no
LOC105194763	whole_body_queen	10.2053375140042	8.51992915301952	7.9709113522416	Queen3	north_america	16.4908405052611	-0.0856962815331333	no
LOC105194795	whole_body_queen	8.23645691888314	3.81512458166897	1.90944825385146	Queen4	north_america	5.72457283552043	-0.726827538198531	no
LOC105194795	whole_body_queen	8.23645691888314	6.85971041480769	6.85971041480769	Queen1	north_america	13.7194208296154	0	no
LOC105194795	whole_body_queen	8.23645691888314	6.47153822329019	3.17594355401545	Queen5	north_america	9.64748177730564	-0.839303081150903	no
LOC105194795	whole_body_queen	8.23645691888314	1.04628606419109	3.04332837308857	Queen6	north_america	4.08961443727966	0.982535531471878	no
LOC105194795	whole_body_queen	8.23645691888314	2.83997638433984	3.9854556761208	Queen3	north_america	6.82543206046064	0.376627936087995	no
LOC105194795	whole_body_queen	8.23645691888314	9.47801944690832	4.5205617260522	Queen2	north_america	13.9985811729605	-0.924479068593021	no
LOC105194811	whole_body_queen	45.0144344950377	5.16982878922272	39.7809431892594	Queen2	north_america	44.9507719784821	2.7245927819439	na
LOC105194811	whole_body_queen	45.0144344950377	5.87975178412087	39.1983452274725	Queen1	north_america	45.0780970115934	2.54670769410183	na
LOC105194811	whole_body_queen	45.0144344950377	6.47153822329019	33.8767312428315	Queen5	north_america	40.3482694661217	2.22278763504607	na
LOC105194811	whole_body_queen	45.0144344950377	4.18514425676438	44.635482805299	Queen6	north_america	48.8206270620634	3.1376999624171	na
LOC105194811	whole_body_queen	45.0144344950377	5.67995276867968	41.8472845992684	Queen3	north_america	47.5272373679481	2.68129397086456	na
LOC105194811	whole_body_queen	45.0144344950377	1.90756229083448	29.5964479346976	Queen4	north_america	31.5040102255321	3.39548216928741	na
LOC105194836	whole_body_queen	18.9472936874716	9.79958630686813	2.93987589206044	Queen1	north_america	12.7394621989286	-1.45475395907352	no
LOC105194836	whole_body_queen	18.9472936874716	7.55012792717189	6.35188710803091	Queen5	north_america	13.9020150352028	-0.217831392309592	no
LOC105194836	whole_body_queen	18.9472936874716	5.23143032095547	10.1444279102952	Queen6	north_america	15.3758582312507	0.838687306008662	no
LOC105194836	whole_body_queen	18.9472936874716	7.57327035823957	14.945458785453	Queen3	north_america	22.5187291436926	0.89522806301025	no
LOC105194836	whole_body_queen	18.9472936874716	10.3396575784454	19.8904715946297	Queen2	north_america	30.2301291730751	0.88146798493578	no
LOC105194836	whole_body_queen	18.9472936874716	7.63024916333793	22.9133790462175	Queen4	north_america	30.5436282095555	1.47034388536814	no
LOC105194855	whole_body_queen	1.97702322239026	1.89331758955989	0	Queen3	north_america	1.89331758955989	-1.53272469165171	no
LOC105194855	whole_body_queen	1.97702322239026	0	0	Queen4	north_america	0	0	no
LOC105194855	whole_body_queen	1.97702322239026	0	0.904112345210441	Queen2	north_america	0.904112345210441	0.929118602120862	no
LOC105194855	whole_body_queen	1.97702322239026	1.0785897038817	1.05864785133848	Queen5	north_america	2.13723755522018	-0.0139079442243087	no
LOC105194855	whole_body_queen	1.97702322239026	0.979958630686813	1.95991726137363	Queen1	north_america	2.93987589206044	0.580086561826869	no
LOC105194855	whole_body_queen	1.97702322239026	1.04628606419109	1.01444279102952	Queen6	north_america	2.06072885522062	-0.0226270089030178	no
LOC105194878	whole_body_queen	2.91477870032526	1.0785897038817	4.23459140535394	Queen5	north_america	5.31318110923564	1.33247191917891	no
LOC105194878	whole_body_queen	2.91477870032526	1.72327626307424	0.904112345210441	Queen2	north_america	2.62738860828468	-0.516224742049444	no
LOC105194878	whole_body_queen	2.91477870032526	2.09257212838219	1.01444279102952	Queen6	north_america	3.10701491941171	-0.618426409328933	no
LOC105194878	whole_body_queen	2.91477870032526	1.95991726137363	0.979958630686813	Queen1	north_america	2.93987589206044	-0.58008656182687	no
LOC105194878	whole_body_queen	2.91477870032526	0	0	Queen4	north_america	0	0	no
LOC105194878	whole_body_queen	2.91477870032526	1.89331758955989	0.996363919030199	Queen3	north_america	2.88968150859009	-0.535349956786319	no
LOC105194887	whole_body_queen	2.08306156863961	2.58491439461136	0.904112345210441	Queen2	north_america	3.4890267398218	-0.912820066612669	no
LOC105194887	whole_body_queen	2.08306156863961	0.953781145417242	0	Queen4	north_america	0.953781145417242	-0.966268871551673	no
LOC105194887	whole_body_queen	2.08306156863961	0.979958630686813	1.95991726137363	Queen1	north_america	2.93987589206044	0.580086561826869	no
LOC105194887	whole_body_queen	2.08306156863961	0.946658794779946	0.996363919030199	Queen3	north_america	1.94302271381015	0.0363747004306876	no
LOC105194887	whole_body_queen	2.08306156863961	0	2.02888558205905	Queen6	north_america	2.02888558205905	1.59878708050576	no
LOC105194887	whole_body_queen	2.08306156863961	1.0785897038817	1.05864785133848	Queen5	north_america	2.13723755522018	-0.0139079442243087	no
LOC105194902	whole_body_queen	2.12487576807279	2.09257212838219	0	Queen6	north_america	2.09257212838219	-1.6288072437209	na
LOC105194902	whole_body_queen	2.12487576807279	3.78663517911978	0	Queen3	north_america	3.78663517911978	-2.25901185299072	na
LOC105194902	whole_body_queen	2.12487576807279	0.953781145417242	0	Queen4	north_america	0.953781145417242	-0.966268871551673	na
LOC105194902	whole_body_queen	2.12487576807279	1.95991726137363	0	Queen1	north_america	1.95991726137363	-1.56555684873454	na
LOC105194902	whole_body_queen	2.12487576807279	2.1571794077634	0	Queen5	north_america	2.1571794077634	-1.65863624460286	na
LOC105194902	whole_body_queen	2.12487576807279	5.16982878922272	0	Queen2	north_america	5.16982878922272	-2.62523045560379	na
LOC105195673	whole_body_queen	1.9342112668583	0.953781145417242	0.95472412692573	Queen4	north_america	1.90850527234297	0.00069614068680925	no
LOC105195673	whole_body_queen	1.9342112668583	1.04628606419109	1.01444279102952	Queen6	north_america	2.06072885522062	-0.0226270089030178	no
LOC105195673	whole_body_queen	1.9342112668583	0.979958630686813	0.979958630686813	Queen1	north_america	1.95991726137363	0	no
LOC105195673	whole_body_queen	1.9342112668583	0.86163813153712	0	Queen2	north_america	0.86163813153712	-0.896572666573614	no
LOC105195673	whole_body_queen	1.9342112668583	0	0.996363919030199	Queen3	north_america	0.996363919030199	0.997374734865391	no
LOC105195673	whole_body_queen	1.9342112668583	1.0785897038817	1.05864785133848	Queen5	north_america	2.13723755522018	-0.0139079442243087	no
LOC105195681	whole_body_queen	3.67425574909053	1.72327626307424	1.80822469042088	Queen2	north_america	3.53150095349512	0.0443150283622435	no
LOC105195681	whole_body_queen	3.67425574909053	2.1571794077634	2.11729570267697	Queen5	north_america	4.27447511044037	-0.0183412309449293	no
LOC105195681	whole_body_queen	3.67425574909053	0.946658794779946	1.9927278380604	Queen3	north_america	2.93938663284035	0.620461050103316	no
LOC105195681	whole_body_queen	3.67425574909053	1.90756229083448	1.90944825385146	Queen4	north_america	3.81701054468594	0.000935487246009695	no
LOC105195681	whole_body_queen	3.67425574909053	2.09257212838219	2.02888558205905	Queen6	north_america	4.12145771044124	-0.0300201632151384	no
LOC105195681	whole_body_queen	3.67425574909053	0.979958630686813	1.95991726137363	Queen1	north_america	2.93987589206044	0.580086561826869	no
LOC105195701	whole_body_queen	16.8147960190908	9.46658794779946	8.9672752712718	Queen3	north_america	18.4338632190713	-0.0705201302211819	no
LOC105195701	whole_body_queen	16.8147960190908	6.47153822329019	8.46918281070788	Queen5	north_america	14.9407210339981	0.34183463429805	no
LOC105195701	whole_body_queen	16.8147960190908	5.87975178412087	5.87975178412087	Queen1	north_america	11.7595035682417	0	no
LOC105195701	whole_body_queen	16.8147960190908	8.6163813153712	10.8493481425253	Queen2	north_america	19.4657294578965	0.301241686595965	no
LOC105195701	whole_body_queen	16.8147960190908	7.32400244933766	9.12998511926571	Queen6	north_america	16.4539875686034	0.283282760153095	no
LOC105195701	whole_body_queen	16.8147960190908	9.53781145417242	7.63779301540584	Queen4	north_america	17.1756044695783	-0.286840620657975	no
LOC105195710	whole_body_queen	1.83712787454527	0.953781145417242	0.95472412692573	Queen4	north_america	1.90850527234297	0.00069614068680925	no
LOC105195710	whole_body_queen	1.83712787454527	0.86163813153712	0.904112345210441	Queen2	north_america	1.76575047674756	0.0325459355472472	no
LOC105195710	whole_body_queen	1.83712787454527	1.0785897038817	1.05864785133848	Queen5	north_america	2.13723755522018	-0.0139079442243087	no
LOC105195710	whole_body_queen	1.83712787454527	1.04628606419109	0	Queen6	north_america	1.04628606419109	-1.03300784329498	no
LOC105195710	whole_body_queen	1.83712787454527	0.946658794779946	0	Queen3	north_america	0.946658794779946	-0.961000034434703	no
LOC105195710	whole_body_queen	1.83712787454527	0.979958630686813	0.979958630686813	Queen1	north_america	1.95991726137363	0	no
LOC105195720	whole_body_queen	51.4222281773328	31.2397402277382	19.927278380604	Queen3	north_america	51.1670186083422	-0.623455419920189	no
LOC105195720	whole_body_queen	51.4222281773328	33.3185934433516	41.1582624888461	Queen1	north_america	74.4768559321978	0.296824984138532	no
LOC105195720	whole_body_queen	51.4222281773328	22.8907474900138	12.4114136500345	Queen4	north_america	35.3021611400483	-0.832990678642357	no
LOC105195720	whole_body_queen	51.4222281773328	31.3885819257328	20.2888558205905	Queen6	north_america	51.6774377463233	-0.605386890215766	no
LOC105195720	whole_body_queen	51.4222281773328	32.357691116451	25.4075484321236	Queen5	north_america	57.7652395485746	-0.337069060897627	no
LOC105195720	whole_body_queen	51.4222281773328	24.1258676830394	16.2740222137879	Queen2	north_america	40.3998898968273	-0.540569368405506	no
LOC105195733	whole_body_queen	5.33137544113543	4.89979315343406	0.979958630686813	Queen1	north_america	5.87975178412088	-1.57519408760985	no
LOC105195733	whole_body_queen	5.33137544113543	4.3081906576856	1.80822469042088	Queen2	north_america	6.11641534810648	-0.918561817308506	no
LOC105195733	whole_body_queen	5.33137544113543	0.953781145417242	0.95472412692573	Queen4	north_america	1.90850527234297	0.00069614068680925	no
LOC105195733	whole_body_queen	5.33137544113543	3.78663517911978	0.996363919030199	Queen3	north_america	4.78299909814998	-1.26163711812533	no
LOC105195733	whole_body_queen	5.33137544113543	0	2.02888558205905	Queen6	north_america	2.02888558205905	1.59878708050576	no
LOC105195733	whole_body_queen	5.33137544113543	4.31435881552679	2.11729570267697	Queen5	north_america	6.43165451820376	-0.769600625518805	no
LOC105195750	whole_body_queen	7.71204370279581	6.67646801792069	4.77362063462865	Queen4	north_america	11.4500886525493	-0.410966356256801	no
LOC105195750	whole_body_queen	7.71204370279581	4.31435881552679	4.23459140535394	Queen5	north_america	8.54895022088073	-0.0218187095613048	no
LOC105195750	whole_body_queen	7.71204370279581	2.93987589206044	3.91983452274725	Queen1	north_america	6.85971041480769	0.320459606911364	no
LOC105195750	whole_body_queen	7.71204370279581	2.58491439461136	3.61644938084176	Queen2	north_america	6.20136377545312	0.36484499891452	no
LOC105195750	whole_body_queen	7.71204370279581	1.89331758955989	4.981819595151	Queen3	north_america	6.87513718471089	1.04785970942647	no
LOC105195750	whole_body_queen	7.71204370279581	3.13885819257328	6.08665674617714	Queen6	north_america	9.22551493875042	0.775872352285938	no
LOC105195766	whole_body_queen	4.34484161567097	0.946658794779946	1.9927278380604	Queen3	north_america	2.93938663284035	0.620461050103316	no
LOC105195766	whole_body_queen	4.34484161567097	4.31435881552679	2.11729570267697	Queen5	north_america	6.43165451820376	-0.769600625518805	no
LOC105195766	whole_body_queen	4.34484161567097	3.81512458166897	0.95472412692573	Queen4	north_america	4.7698487085947	-1.30060811314715	no
LOC105195766	whole_body_queen	4.34484161567097	0	1.80822469042088	Queen2	north_america	1.80822469042088	1.48965837253255	no
LOC105195766	whole_body_queen	4.34484161567097	1.95991726137363	1.95991726137363	Queen1	north_america	3.91983452274725	0	no
LOC105195766	whole_body_queen	4.34484161567097	2.09257212838219	4.05777116411809	Queen6	north_america	6.15034329250028	0.709694520868154	no
LOC105195772	whole_body_queen	1.41219916404302	0.86163813153712	0.904112345210441	Queen2	north_america	1.76575047674756	0.0325459355472472	no
LOC105195772	whole_body_queen	1.41219916404302	0	1.05864785133848	Queen5	north_america	1.05864785133848	1.04169706621221	no
LOC105195772	whole_body_queen	1.41219916404302	0.979958630686813	0	Queen1	north_america	0.979958630686813	-0.985470286907669	no
LOC105195772	whole_body_queen	1.41219916404302	1.90756229083448	3.81889650770292	Queen4	north_america	5.7264587985374	0.728892717649147	no
LOC105195772	whole_body_queen	1.41219916404302	0.946658794779946	0	Queen3	north_america	0.946658794779946	-0.961000034434703	no
LOC105195772	whole_body_queen	1.41219916404302	2.09257212838219	0	Queen6	north_america	2.09257212838219	-1.6288072437209	no
LOC105195781	whole_body_queen	5.89972847573104	1.0785897038817	1.05864785133848	Queen5	north_america	2.13723755522018	-0.0139079442243087	no
LOC105195781	whole_body_queen	5.89972847573104	2.86134343625172	2.86417238077719	Queen4	north_america	5.72551581702892	0.00105657784332405	no
LOC105195781	whole_body_queen	5.89972847573104	5.67995276867968	1.9927278380604	Queen3	north_america	7.67268060674008	-1.15837681746782	no
LOC105195781	whole_body_queen	5.89972847573104	1.04628606419109	2.02888558205905	Queen6	north_america	3.07517164625014	0.565779237210777	no
LOC105195781	whole_body_queen	5.89972847573104	5.16982878922272	0.904112345210441	Queen2	north_america	6.07394113443316	-1.69611185348293	no
LOC105195781	whole_body_queen	5.89972847573104	6.85971041480769	1.95991726137363	Queen1	north_america	8.81962767618131	-1.40891930970135	no
LOC105195789	whole_body_queen	14.7010564957751	3.81512458166897	5.72834476155438	Queen4	north_america	9.54346934322335	0.482678506045937	no
LOC105195789	whole_body_queen	14.7010564957751	8.6163813153712	6.32878641647309	Queen2	north_america	14.9451677318443	-0.391919783581414	no
LOC105195789	whole_body_queen	14.7010564957751	10.7795449375549	8.81962767618131	Queen1	north_america	19.5991726137363	-0.262543577603706	no
LOC105195789	whole_body_queen	14.7010564957751	5.67995276867968	7.9709113522416	Queen3	north_america	13.6508641209213	0.425416653548056	no
LOC105195789	whole_body_queen	14.7010564957751	8.62871763105359	6.35188710803091	Queen5	north_america	14.9806047390845	-0.389229056809483	no
LOC105195789	whole_body_queen	14.7010564957751	8.37028851352876	6.08665674617714	Queen6	north_america	14.4569452597059	-0.40298829807723	no
LOC105195797	whole_body_queen	20.8466932653841	15.2604983266759	19.0944825385146	Queen4	north_america	34.3549808651905	0.30542795484407	no
LOC105195797	whole_body_queen	20.8466932653841	10.4628606419109	8.11554232823618	Queen6	north_america	18.5784029701471	-0.330566727356349	no
LOC105195797	whole_body_queen	20.8466932653841	8.62871763105359	8.46918281070788	Queen5	north_america	17.0979004417615	-0.0241037436256084	no
LOC105195797	whole_body_queen	20.8466932653841	12.7394621989286	9.79958630686813	Queen1	north_america	22.5390485057967	-0.347349485119724	no
LOC105195797	whole_body_queen	20.8466932653841	8.6163813153712	11.7534604877357	Queen2	north_america	20.3698418031069	0.407322747942992	no
LOC105195797	whole_body_queen	20.8466932653841	11.3599055373594	9.963639190302	Queen3	north_america	21.3235447276613	-0.172940961800419	no
LOC105195826	whole_body_queen	22.9831279921327	23.5190071364835	5.87975178412087	Queen1	north_america	29.3987589206044	-1.83347214054844	na
LOC105195826	whole_body_queen	22.9831279921327	10.3396575784454	0	Queen2	north_america	10.3396575784454	-3.50330517102841	na
LOC105195826	whole_body_queen	22.9831279921327	12.3065643321393	3.9854556761208	Queen3	north_america	16.2920200082601	-1.41634084523475	na
LOC105195826	whole_body_queen	22.9831279921327	13.3529360358414	5.72834476155438	Queen4	north_america	19.0812807973958	-1.09302234816726	na
LOC105195826	whole_body_queen	22.9831279921327	22.6503837815157	4.23459140535394	Queen5	north_america	26.8849751868696	-2.17571476005001	na
LOC105195826	whole_body_queen	22.9831279921327	23.0182934122041	10.1444279102952	Queen6	north_america	33.1627213224993	-1.10781108693509	na
LOC105195859	whole_body_queen	0.988161274858506	0	0.904112345210441	Queen2	north_america	0.904112345210441	0.929118602120862	no
LOC105195859	whole_body_queen	0.988161274858506	0	0	Queen6	north_america	0	0	no
LOC105195859	whole_body_queen	0.988161274858506	1.90756229083448	1.90944825385146	Queen4	north_america	3.81701054468594	0.000935487246009695	no
LOC105195859	whole_body_queen	0.988161274858506	0	1.05864785133848	Queen5	north_america	1.05864785133848	1.04169706621221	no
LOC105195859	whole_body_queen	0.988161274858506	0	0.996363919030199	Queen3	north_america	0.996363919030199	0.997374734865391	no
LOC105195859	whole_body_queen	0.988161274858506	0	0.979958630686813	Queen1	north_america	0.979958630686813	0.985470286907668	no
LOC105196903	whole_body_queen	6.16150329597124	2.86134343625172	1.90944825385146	Queen4	north_america	4.77079169010319	-0.408357289222251	no
LOC105196903	whole_body_queen	6.16150329597124	1.72327626307424	1.80822469042088	Queen2	north_america	3.53150095349512	0.0443150283622435	no
LOC105196903	whole_body_queen	6.16150329597124	4.18514425676438	4.05777116411809	Queen6	north_america	8.24291542088247	-0.0358823624674825	no
LOC105196903	whole_body_queen	6.16150329597124	3.91983452274725	3.91983452274725	Queen1	north_america	7.8396690454945	0	no
LOC105196903	whole_body_queen	6.16150329597124	2.83997638433984	1.9927278380604	Queen3	north_america	4.83270422240024	-0.359636353934307	no
LOC105196903	whole_body_queen	6.16150329597124	4.31435881552679	3.17594355401545	Queen5	north_america	7.49030236954225	-0.34779342796155	no
LOC105196904	whole_body_queen	2.44144930293529	0.86163813153712	0.904112345210441	Queen2	north_america	1.76575047674756	0.0325459355472472	no
LOC105196904	whole_body_queen	2.44144930293529	1.95991726137363	0.979958630686813	Queen1	north_america	2.93987589206044	-0.58008656182687	no
LOC105196904	whole_body_queen	2.44144930293529	0.953781145417242	0.95472412692573	Queen4	north_america	1.90850527234297	0.00069614068680925	no
LOC105196904	whole_body_queen	2.44144930293529	2.1571794077634	1.05864785133848	Queen5	north_america	3.21582725910188	-0.616939178390645	no
LOC105196904	whole_body_queen	2.44144930293529	0.946658794779946	0.996363919030199	Queen3	north_america	1.94302271381015	0.0363747004306876	no
LOC105196904	whole_body_queen	2.44144930293529	2.09257212838219	2.02888558205905	Queen6	north_america	4.12145771044124	-0.0300201632151384	no
LOC105196907	whole_body_queen	7.82709222209922	3.13885819257328	6.08665674617714	Queen6	north_america	9.22551493875042	0.775872352285938	no
LOC105196907	whole_body_queen	7.82709222209922	2.93987589206044	0.979958630686813	Queen1	north_america	3.91983452274725	-0.992679897918909	no
LOC105196907	whole_body_queen	7.82709222209922	2.83997638433984	3.9854556761208	Queen3	north_america	6.82543206046064	0.376627936087995	no
LOC105196907	whole_body_queen	7.82709222209922	4.3081906576856	4.5205617260522	Queen2	north_america	8.8287523837378	0.0565948811766524	no
LOC105196907	whole_body_queen	7.82709222209922	1.90756229083448	2.86417238077719	Queen4	north_america	4.77173467161168	0.410349354311585	no
LOC105196907	whole_body_queen	7.82709222209922	6.47153822329019	8.46918281070788	Queen5	north_america	14.9407210339981	0.34183463429805	no
LOC105196908	whole_body_queen	1.95146998759189	1.04628606419109	1.01444279102952	Queen6	north_america	2.06072885522062	-0.0226270089030178	no
LOC105196908	whole_body_queen	1.95146998759189	1.0785897038817	1.05864785133848	Queen5	north_america	2.13723755522018	-0.0139079442243087	no
LOC105196908	whole_body_queen	1.95146998759189	0.953781145417242	0.95472412692573	Queen4	north_america	1.90850527234297	0.00069614068680925	no
LOC105196908	whole_body_queen	1.95146998759189	0.86163813153712	0.904112345210441	Queen2	north_america	1.76575047674756	0.0325459355472472	no
LOC105196908	whole_body_queen	1.95146998759189	0.946658794779946	0.996363919030199	Queen3	north_america	1.94302271381015	0.0363747004306876	no
LOC105196908	whole_body_queen	1.95146998759189	0.979958630686813	0.979958630686813	Queen1	north_america	1.95991726137363	0	no
LOC105196909	whole_body_queen	26.2029040902651	10.4628606419109	14.2021990744133	Queen6	north_america	24.6650597163243	0.407312907567587	no
LOC105196909	whole_body_queen	26.2029040902651	13.7194208296154	11.7595035682417	Queen1	north_america	25.4789243978571	-0.206148706754392	no
LOC105196909	whole_body_queen	26.2029040902651	15.1002558543438	10.5864785133848	Queen5	north_america	25.6867343677286	-0.474641461213262	no
LOC105196909	whole_body_queen	26.2029040902651	18.9331758955989	16.9381866235134	Queen3	north_america	35.8713625191123	-0.15213753377457	no
LOC105196909	whole_body_queen	26.2029040902651	13.3529360358414	13.3661377769602	Queen4	north_america	26.7190738128016	0.00132637200690749	no
LOC105196909	whole_body_queen	26.2029040902651	15.5094863676682	16.2740222137879	Queen2	north_america	31.7835085814561	0.0653088132259425	no
LOC105196910	whole_body_queen	11.9077023826908	5.67995276867968	7.9709113522416	Queen3	north_america	13.6508641209213	0.425416653548056	no
LOC105196910	whole_body_queen	11.9077023826908	5.72268687250345	5.72834476155438	Queen4	north_america	11.4510316340578	0.00121367775783272	no
LOC105196910	whole_body_queen	11.9077023826908	3.44655252614848	4.5205617260522	Queen2	north_america	7.96711425220068	0.312127843029085	no
LOC105196910	whole_body_queen	11.9077023826908	6.85971041480769	5.87975178412087	Queen1	north_america	12.7394621989286	-0.192119643839589	no
LOC105196910	whole_body_queen	11.9077023826908	2.1571794077634	6.35188710803091	Queen5	north_america	8.5090665157943	1.2194783688774	no
LOC105196910	whole_body_queen	11.9077023826908	6.27771638514657	6.08665674617714	Queen6	north_america	12.3643731313237	-0.0383806585715575	no
LOC105199287	whole_body_queen	23.7981561969855	32.4348679899239	32.4621693129447	Queen6	north_america	64.8970373028687	0.00117755545257444	no
LOC105199287	whole_body_queen	23.7981561969855	9.46658794779946	4.981819595151	Queen3	north_america	14.4484075429505	-0.807134901783296	no
LOC105199287	whole_body_queen	23.7981561969855	22.8907474900138	19.0944825385146	Queen4	north_america	41.9852300285284	-0.249652566892582	no
LOC105199287	whole_body_queen	23.7981561969855	12.9245719730568	7.23289876168353	Queen2	north_america	20.1574707347403	-0.758160590517435	no
LOC105199287	whole_body_queen	23.7981561969855	15.1002558543438	2.11729570267697	Queen5	north_america	17.2175515570207	-2.36871669608237	no
LOC105199287	whole_body_queen	23.7981561969855	15.679338090989	11.7595035682417	Queen1	north_america	27.4388416592308	-0.386489837963094	no
LOC105199288	whole_body_queen	1.98414557302755	1.0785897038817	1.05864785133848	Queen5	north_america	2.13723755522018	-0.0139079442243087	no
LOC105199288	whole_body_queen	1.98414557302755	1.89331758955989	0	Queen3	north_america	1.89331758955989	-1.53272469165171	no
LOC105199288	whole_body_queen	1.98414557302755	1.72327626307424	0.904112345210441	Queen2	north_america	2.62738860828468	-0.516224742049444	no
LOC105199288	whole_body_queen	1.98414557302755	1.90756229083448	0	Queen4	north_america	1.90756229083448	-1.53981009994109	no
LOC105199288	whole_body_queen	1.98414557302755	1.04628606419109	1.01444279102952	Queen6	north_america	2.06072885522062	-0.0226270089030178	no
LOC105199288	whole_body_queen	1.98414557302755	0.979958630686813	0	Queen1	north_america	0.979958630686813	-0.985470286907669	no
LOC105199289	whole_body_queen	5.13639991014967	3.78663517911978	1.9927278380604	Queen3	north_america	5.77936301718018	-0.677550768452699	no
LOC105199289	whole_body_queen	5.13639991014967	2.93987589206044	1.95991726137363	Queen1	north_america	4.89979315343406	-0.41259333609204	no
LOC105199289	whole_body_queen	5.13639991014967	3.81512458166897	0.95472412692573	Queen4	north_america	4.7698487085947	-1.30060811314715	no
LOC105199289	whole_body_queen	5.13639991014967	4.31435881552679	1.05864785133848	Queen5	north_america	5.37300666686528	-1.36819857296452	no
LOC105199289	whole_body_queen	5.13639991014967	2.09257212838219	2.02888558205905	Queen6	north_america	4.12145771044124	-0.0300201632151384	no
LOC105199289	whole_body_queen	5.13639991014967	4.3081906576856	1.80822469042088	Queen2	north_america	6.11641534810648	-0.918561817308506	no
LOC105199290	whole_body_queen	5.99808356611368	4.3081906576856	1.80822469042088	Queen2	north_america	6.11641534810648	-0.918561817308506	no
LOC105199290	whole_body_queen	5.99808356611368	3.2357691116451	2.11729570267697	Queen5	north_america	5.35306481432206	-0.4423289376735	no
LOC105199290	whole_body_queen	5.99808356611368	5.72268687250345	1.90944825385146	Queen4	north_america	7.63213512635491	-1.20829236648663	no
LOC105199290	whole_body_queen	5.99808356611368	7.32400244933766	4.05777116411809	Queen6	north_america	11.3817736134558	-0.718775624997263	no
LOC105199290	whole_body_queen	5.99808356611368	3.91983452274725	1.95991726137363	Queen1	north_america	5.87975178412088	-0.733052943003404	no
LOC105199290	whole_body_queen	5.99808356611368	3.78663517911978	1.9927278380604	Queen3	north_america	5.77936301718018	-0.677550768452699	no
LOC105199292	whole_body_queen	13.6392210050504	4.76890572708621	4.77362063462865	Queen4	north_america	9.54252636171486	0.00117862829936877	no
LOC105199292	whole_body_queen	13.6392210050504	5.23143032095547	10.1444279102952	Queen6	north_america	15.3758582312507	0.838687306008662	no
LOC105199292	whole_body_queen	13.6392210050504	7.55012792717189	7.41053495936939	Queen5	north_america	14.9606628865413	-0.023748438521824	no
LOC105199292	whole_body_queen	13.6392210050504	4.73329397389973	3.9854556761208	Queen3	north_america	8.71874965002053	-0.201638880372576	no
LOC105199292	whole_body_queen	13.6392210050504	8.81962767618131	6.85971041480769	Queen1	north_america	15.679338090989	-0.321192165502241	no
LOC105199292	whole_body_queen	13.6392210050504	6.89310505229696	5.42467407126264	Queen2	north_america	12.3177791235596	-0.296969683606553	no
LOC105199293	whole_body_queen	15.5784600648282	7.8396690454945	5.87975178412087	Queen1	north_america	13.7194208296154	-0.361635841970425	no
LOC105199293	whole_body_queen	15.5784600648282	8.37028851352876	3.04332837308857	Queen6	north_america	11.4136168866173	-1.2125500947429	no
LOC105199293	whole_body_queen	15.5784600648282	16.2142794720931	12.4114136500345	Queen4	north_america	28.6256931221276	-0.360144481461715	no
LOC105199293	whole_body_queen	15.5784600648282	8.62871763105359	4.23459140535394	Queen5	north_america	12.8633090364075	-0.879266740674316	no
LOC105199293	whole_body_queen	15.5784600648282	9.46658794779946	7.9709113522416	Queen3	north_america	17.4374993000411	-0.222464747307582	no
LOC105199293	whole_body_queen	15.5784600648282	18.9560388938166	13.5616851781566	Queen2	north_america	32.5177240719732	-0.454648062467391	no
LOC105199295	whole_body_queen	46.6666703614013	31.0189727353363	16.2740222137879	Queen2	north_america	47.2929949491242	-0.890322972621733	na
LOC105199295	whole_body_queen	46.6666703614013	27.4388416592308	13.7194208296154	Queen1	north_america	41.1582624888461	-0.950141797560863	na
LOC105199295	whole_body_queen	46.6666703614013	32.4285589441862	17.1850342846631	Queen4	north_america	49.6135932288494	-0.878329518100717	na
LOC105199295	whole_body_queen	46.6666703614013	34.0797166120781	17.9345505425436	Queen3	north_america	52.0142671546217	-0.889615917399856	na
LOC105199295	whole_body_queen	46.6666703614013	29.2960097973506	15.2166418654428	Queen6	north_america	44.5126516627935	-0.901652695010239	na
LOC105199295	whole_body_queen	46.6666703614013	28.0433323009242	17.9970134727542	Queen5	north_america	46.0403457736784	-0.612434361368947	na
LOC105199296	whole_body_queen	10.5575162434098	3.2357691116451	6.35188710803091	Queen5	north_america	9.587656219676	0.795490662148833	no
LOC105199296	whole_body_queen	10.5575162434098	3.78663517911978	5.9781835141812	Queen3	north_america	9.76481869330098	0.543839685429763	no
LOC105199296	whole_body_queen	10.5575162434098	6.27771638514657	4.05777116411809	Queen6	north_america	10.3354875492647	-0.524984065415039	no
LOC105199296	whole_body_queen	10.5575162434098	5.16982878922272	10.8493481425253	Queen2	north_america	16.019176931748	0.941505334912318	no
LOC105199296	whole_body_queen	10.5575162434098	5.87975178412087	4.89979315343406	Queen1	north_america	10.7795449375549	-0.221692140078784	no
LOC105199296	whole_body_queen	10.5575162434098	4.76890572708621	7.63779301540584	Queen4	north_america	12.4066987424921	0.582365058426841	no
LOC105199297	whole_body_queen	6.79799011760227	2.83997638433984	1.9927278380604	Queen3	north_america	4.83270422240024	-0.359636353934307	no
LOC105199297	whole_body_queen	6.79799011760227	11.4453737450069	11.4566895231088	Queen4	north_america	22.9020632681157	0.00131115385092837	no
LOC105199297	whole_body_queen	6.79799011760227	3.2357691116451	2.11729570267697	Queen5	north_america	5.35306481432206	-0.4423289376735	no
LOC105199297	whole_body_queen	6.79799011760227	0.979958630686813	0.979958630686813	Queen1	north_america	1.95991726137363	0	no
LOC105199297	whole_body_queen	6.79799011760227	8.6163813153712	5.42467407126264	Queen2	north_america	14.0410553866338	-0.581870836804303	no
LOC105199297	whole_body_queen	6.79799011760227	4.18514425676438	4.05777116411809	Queen6	north_america	8.24291542088247	-0.0358823624674825	no
LOC105199298	whole_body_queen	3.19321420910446	0	0.996363919030199	Queen3	north_america	0.996363919030199	0.997374734865391	no
LOC105199298	whole_body_queen	3.19321420910446	3.44655252614848	0	Queen2	north_america	3.44655252614848	-2.15268722798862	no
LOC105199298	whole_body_queen	3.19321420910446	2.09257212838219	2.02888558205905	Queen6	north_america	4.12145771044124	-0.0300201632151384	no
LOC105199298	whole_body_queen	3.19321420910446	1.95991726137363	0.979958630686813	Queen1	north_america	2.93987589206044	-0.58008656182687	no
LOC105199298	whole_body_queen	3.19321420910446	1.0785897038817	0	Queen5	north_america	1.0785897038817	-1.05560501043652	no
LOC105199298	whole_body_queen	3.19321420910446	0.953781145417242	2.86417238077719	Queen4	north_america	3.81795352619443	0.983890582701003	no
LOC105199299	whole_body_queen	8.64382086172224	7.32400244933766	4.05777116411809	Queen6	north_america	11.3817736134558	-0.718775624997263	no
LOC105199299	whole_body_queen	8.64382086172224	3.81512458166897	3.81889650770292	Queen4	north_america	7.63402108937189	0.00112969220460692	no
LOC105199299	whole_body_queen	8.64382086172224	5.39294851940849	3.17594355401545	Queen5	north_america	8.56889207342395	-0.614379265061578	no
LOC105199299	whole_body_queen	8.64382086172224	5.87975178412087	4.89979315343406	Queen1	north_america	10.7795449375549	-0.221692140078784	no
LOC105199299	whole_body_queen	8.64382086172224	4.73329397389973	3.9854556761208	Queen3	north_america	8.71874965002053	-0.201638880372576	no
LOC105199299	whole_body_queen	8.64382086172224	4.3081906576856	3.61644938084176	Queen2	north_america	7.92464003852736	-0.201436522193005	no
LOC105199300	whole_body_queen	20.9558115457692	11.7595035682417	8.81962767618131	Queen1	north_america	20.5791312444231	-0.377831970462038	no
LOC105199300	whole_body_queen	20.9558115457692	7.57327035823957	7.9709113522416	Queen3	north_america	15.5441817104812	0.0654089160222752	no
LOC105199300	whole_body_queen	20.9558115457692	8.62871763105359	12.7037742160618	Queen5	north_america	21.3324918471154	0.509157711426143	no
LOC105199300	whole_body_queen	20.9558115457692	11.4453737450069	11.4566895231088	Queen4	north_america	22.9020632681157	0.00131115385092837	no
LOC105199300	whole_body_queen	20.9558115457692	9.41657457771985	15.2166418654428	Queen6	north_america	24.6332164431627	0.638594163078768	no
LOC105199300	whole_body_queen	20.9558115457692	8.6163813153712	9.04112345210441	Queen2	north_america	17.6575047674756	0.0623546853659317	no
LOC105199302	whole_body_queen	7.32731404327151	3.2357691116451	3.17594355401545	Queen5	north_america	6.41171266566055	-0.0205217401162448	no
LOC105199302	whole_body_queen	7.32731404327151	3.78663517911978	1.9927278380604	Queen3	north_america	5.77936301718018	-0.677550768452699	no
LOC105199302	whole_body_queen	7.32731404327151	0.979958630686813	1.95991726137363	Queen1	north_america	2.93987589206044	0.580086561826869	no
LOC105199302	whole_body_queen	7.32731404327151	4.18514425676438	4.05777116411809	Queen6	north_america	8.24291542088247	-0.0358823624674825	no
LOC105199302	whole_body_queen	7.32731404327151	3.81512458166897	4.77362063462865	Queen4	north_america	8.58874521629762	0.261903190619083	no
LOC105199302	whole_body_queen	7.32731404327151	2.58491439461136	6.32878641647309	Queen2	north_america	8.91370081108444	1.0316356516052	no
LOC105199303	whole_body_queen	20.7685800008279	11.3599055373594	14.945458785453	Queen3	north_america	26.3053643228123	0.367477890407688	no
LOC105199303	whole_body_queen	20.7685800008279	8.37028851352876	12.1733134923543	Queen6	north_america	20.543602005883	0.491452898666306	no
LOC105199303	whole_body_queen	20.7685800008279	8.62871763105359	8.46918281070788	Queen5	north_america	17.0979004417615	-0.0241037436256084	no
LOC105199303	whole_body_queen	20.7685800008279	10.4915925995897	10.501965396183	Queen4	north_america	20.9935579957727	0.0013016500728869	no
LOC105199303	whole_body_queen	20.7685800008279	7.8396690454945	9.79958630686813	Queen1	north_america	17.6392553523626	0.288911787333369	no
LOC105199303	whole_body_queen	20.7685800008279	12.0629338415197	9.04112345210441	Queen2	north_america	21.1040572936241	-0.379558257865829	no
LOC105199304	whole_body_queen	18.501958213523	8.6163813153712	16.2740222137879	Queen2	north_america	24.8904035291591	0.845038040958875	no
LOC105199304	whole_body_queen	18.501958213523	7.57327035823957	15.9418227044832	Queen3	north_america	23.5150930627228	0.982671552296177	no
LOC105199304	whole_body_queen	18.501958213523	5.23143032095547	12.1733134923543	Queen6	north_america	17.4047438133098	1.07998302031873	no
LOC105199304	whole_body_queen	18.501958213523	7.55012792717189	8.46918281070788	Queen5	north_america	16.0193107378798	0.147293920874283	no
LOC105199304	whole_body_queen	18.501958213523	10.4915925995897	5.72834476155438	Queen4	north_america	16.219937361144	-0.772255215861936	no
LOC105199304	whole_body_queen	18.501958213523	11.7595035682417	7.8396690454945	Queen1	north_america	19.5991726137363	-0.529507937833441	no
LOC105199305	whole_body_queen	5.81183075030092	1.95991726137363	0.979958630686813	Queen1	north_america	2.93987589206044	-0.58008656182687	no
LOC105199305	whole_body_queen	5.81183075030092	3.2357691116451	4.23459140535394	Queen5	north_america	7.47036051699903	0.305452978284	no
LOC105199305	whole_body_queen	5.81183075030092	1.90756229083448	8.59251714233157	Queen4	north_america	10.5000794331661	1.72209933806103	no
LOC105199305	whole_body_queen	5.81183075030092	3.13885819257328	1.01444279102952	Queen6	north_america	4.15330098360281	-1.03885198475463	no
LOC105199305	whole_body_queen	5.81183075030092	5.67995276867968	11.9563670283624	Queen3	north_america	17.6363197970421	0.955751435415484	no
LOC105199305	whole_body_queen	5.81183075030092	0.86163813153712	0.904112345210441	Queen2	north_america	1.76575047674756	0.0325459355472472	no
LOC105199307	whole_body_queen	9.05609551414325	5.72268687250345	5.72834476155438	Queen4	north_america	11.4510316340578	0.00121367775783272	no
LOC105199307	whole_body_queen	9.05609551414325	5.67995276867968	4.981819595151	Queen3	north_america	10.6617723638307	-0.159253500927658	no
LOC105199307	whole_body_queen	9.05609551414325	4.3081906576856	7.23289876168353	Queen2	north_america	11.5410894193691	0.633180295822073	no
LOC105199307	whole_body_queen	9.05609551414325	1.95991726137363	3.91983452274725	Queen1	north_america	5.87975178412088	0.733052943003404	no
LOC105199307	whole_body_queen	9.05609551414325	2.09257212838219	3.04332837308857	Queen6	north_america	5.13590050147076	0.386736131045963	no
LOC105199307	whole_body_queen	9.05609551414325	2.1571794077634	5.29323925669242	Queen5	north_america	7.45041866445582	0.995166547803712	no
LOC105199309	whole_body_queen	7.72078618379407	22.4025914199651	27.1233703563132	Queen2	north_america	49.5259617762783	0.26510120857139	no
LOC105199309	whole_body_queen	7.72078618379407	18.3360249659889	24.3489005807851	Queen5	north_america	42.684925546774	0.390631935799247	no
LOC105199309	whole_body_queen	7.72078618379407	1.90756229083448	3.81889650770292	Queen4	north_america	5.7264587985374	0.728892717649147	no
LOC105199309	whole_body_queen	7.72078618379407	3.13885819257328	2.02888558205905	Queen6	north_america	5.16774377463233	-0.450445738640836	no
LOC105199309	whole_body_queen	7.72078618379407	4.73329397389973	4.981819595151	Queen3	north_america	9.71511356905073	0.0612201461452846	no
LOC105199309	whole_body_queen	7.72078618379407	0.979958630686813	0.979958630686813	Queen1	north_america	1.95991726137363	0	no
LOC105199310	whole_body_queen	9.65304691791257	6.85971041480769	5.87975178412087	Queen1	north_america	12.7394621989286	-0.192119643839589	no
LOC105199310	whole_body_queen	9.65304691791257	4.76890572708621	2.86417238077719	Queen4	north_america	7.6330781078634	-0.578138233452669	no
LOC105199310	whole_body_queen	9.65304691791257	5.16982878922272	4.5205617260522	Queen2	north_america	9.69039051527492	-0.160415384586086	no
LOC105199310	whole_body_queen	9.65304691791257	5.39294851940849	3.17594355401545	Queen5	north_america	8.56889207342395	-0.614379265061578	no
LOC105199310	whole_body_queen	9.65304691791257	8.37028851352876	4.05777116411809	Queen6	north_america	12.4280596776468	-0.889591704920711	no
LOC105199310	whole_body_queen	9.65304691791257	6.62661156345962	2.9890917570906	Queen3	north_america	9.61570332055022	-0.934981913992166	no
LOC105199311	whole_body_queen	21.6130048424542	10.785897038817	9.52783066204636	Queen5	north_america	20.3137277008633	-0.162853379099433	no
LOC105199311	whole_body_queen	21.6130048424542	11.7595035682417	11.7595035682417	Queen1	north_america	23.5190071364835	0	no
LOC105199311	whole_body_queen	21.6130048424542	12.3065643321393	7.9709113522416	Queen3	north_america	20.2774756843809	-0.568811664241178	no
LOC105199311	whole_body_queen	21.6130048424542	12.0629338415197	10.8493481425253	Queen2	north_america	22.912281984045	-0.140671256635796	no
LOC105199311	whole_body_queen	21.6130048424542	14.3067171812586	10.501965396183	Queen4	north_america	24.8086825774417	-0.412284499943491	no
LOC105199311	whole_body_queen	21.6130048424542	10.4628606419109	9.12998511926571	Queen6	north_america	19.5928457611767	-0.178335069425132	no
LOC105199313	whole_body_queen	35.9898256735403	1.90756229083448	0.95472412692573	Queen4	north_america	2.86228641776021	-0.57284508770261	no
LOC105199313	whole_body_queen	35.9898256735403	17.2574352621072	21.1729570267697	Queen5	north_america	38.4303922888769	0.280317068508537	no
LOC105199313	whole_body_queen	35.9898256735403	9.46658794779946	7.9709113522416	Queen3	north_america	17.4374993000411	-0.222464747307582	no
LOC105199313	whole_body_queen	35.9898256735403	16.3711244992053	17.1781345589984	Queen2	north_america	33.5492590582036	0.065513009467814	no
LOC105199313	whole_body_queen	35.9898256735403	23.5190071364835	26.4588830285439	Queen1	north_america	49.9778901650274	0.163372380524238	no
LOC105199313	whole_body_queen	35.9898256735403	14.6480048986753	27.3899553577971	Queen6	north_america	42.0379602564724	0.859401853432301	no
LOC105199314	whole_body_queen	4.23606129090008	0.946658794779946	1.9927278380604	Queen3	north_america	2.93938663284035	0.620461050103316	no
LOC105199314	whole_body_queen	4.23606129090008	3.44655252614848	0.904112345210441	Queen2	north_america	4.35066487135892	-1.22356862586776	no
LOC105199314	whole_body_queen	4.23606129090008	2.09257212838219	2.02888558205905	Queen6	north_america	4.12145771044124	-0.0300201632151384	no
LOC105199314	whole_body_queen	4.23606129090008	1.0785897038817	4.23459140535394	Queen5	north_america	5.31318110923564	1.33247191917891	no
LOC105199314	whole_body_queen	4.23606129090008	1.95991726137363	1.95991726137363	Queen1	north_america	3.91983452274725	0	no
LOC105199314	whole_body_queen	4.23606129090008	1.90756229083448	2.86417238077719	Queen4	north_america	4.77173467161168	0.410349354311585	no
LOC105199315	whole_body_queen	3.61659385263413	3.44655252614848	0	Queen2	north_america	3.44655252614848	-2.15268722798862	na
LOC105199315	whole_body_queen	3.61659385263413	1.95991726137363	0	Queen1	north_america	1.95991726137363	-1.56555684873454	na
LOC105199315	whole_body_queen	3.61659385263413	3.78663517911978	0	Queen3	north_america	3.78663517911978	-2.25901185299072	na
LOC105199315	whole_body_queen	3.61659385263413	3.81512458166897	0	Queen4	north_america	3.81512458166897	-2.26757312538563	na
LOC105199315	whole_body_queen	3.61659385263413	4.18514425676438	0	Queen6	north_america	4.18514425676438	-2.37438412705653	na
LOC105199315	whole_body_queen	3.61659385263413	1.0785897038817	0	Queen5	north_america	1.0785897038817	-1.05560501043652	na
LOC105199316	whole_body_queen	14.5307719154024	11.509146706102	7.10109953720666	Queen6	north_america	18.6102462433087	-0.626793742501914	na
LOC105199316	whole_body_queen	14.5307719154024	8.6163813153712	5.42467407126264	Queen2	north_america	14.0410553866338	-0.581870836804303	na
LOC105199316	whole_body_queen	14.5307719154024	10.785897038817	4.23459140535394	Queen5	north_america	15.0204884441709	-1.17091273329588	na
LOC105199316	whole_body_queen	14.5307719154024	9.79958630686813	2.93987589206044	Queen1	north_america	12.7394621989286	-1.45475395907352	na
LOC105199316	whole_body_queen	14.5307719154024	11.3599055373594	3.9854556761208	Queen3	north_america	15.3453612134802	-1.30987043757386	na
LOC105199316	whole_body_queen	14.5307719154024	9.53781145417242	2.86417238077719	Queen4	north_america	12.4019838349496	-1.44734391253749	na
LOC105199317	whole_body_queen	2.01032305829712	0.946658794779946	0.996363919030199	Queen3	north_america	1.94302271381015	0.0363747004306876	no
LOC105199317	whole_body_queen	2.01032305829712	0.979958630686813	0.979958630686813	Queen1	north_america	1.95991726137363	0	no
LOC105199317	whole_body_queen	2.01032305829712	1.04628606419109	1.01444279102952	Queen6	north_america	2.06072885522062	-0.0226270089030178	no
LOC105199317	whole_body_queen	2.01032305829712	0.86163813153712	0	Queen2	north_america	0.86163813153712	-0.896572666573614	no
LOC105199317	whole_body_queen	2.01032305829712	1.90756229083448	0.95472412692573	Queen4	north_america	2.86228641776021	-0.57284508770261	no
LOC105199317	whole_body_queen	2.01032305829712	1.0785897038817	1.05864785133848	Queen5	north_america	2.13723755522018	-0.0139079442243087	no
LOC105199318	whole_body_queen	21.4457908611126	5.72268687250345	7.63779301540584	Queen4	north_america	13.3604798879093	0.36162479245845	no
LOC105199318	whole_body_queen	21.4457908611126	12.0629338415197	11.7534604877357	Queen2	north_america	23.8163943292554	-0.0345901952887688	no
LOC105199318	whole_body_queen	21.4457908611126	6.27771638514657	11.1588707013248	Queen6	north_america	17.4365870864713	0.740451504416696	no
LOC105199318	whole_body_queen	21.4457908611126	11.3599055373594	19.927278380604	Queen3	north_america	31.2871839179633	0.759716982205581	no
LOC105199318	whole_body_queen	21.4457908611126	10.7795449375549	10.7795449375549	Queen1	north_america	21.5590898751099	0	no
LOC105199318	whole_body_queen	21.4457908611126	8.62871763105359	12.7037742160618	Queen5	north_america	21.3324918471154	0.509157711426143	no
LOC105199319	whole_body_queen	7.21386174328071	4.31435881552679	4.23459140535394	Queen5	north_america	8.54895022088073	-0.0218187095613048	no
LOC105199319	whole_body_queen	7.21386174328071	1.95991726137363	0.979958630686813	Queen1	north_america	2.93987589206044	-0.58008656182687	no
LOC105199319	whole_body_queen	7.21386174328071	2.09257212838219	2.02888558205905	Queen6	north_america	4.12145771044124	-0.0300201632151384	no
LOC105199319	whole_body_queen	7.21386174328071	1.89331758955989	3.9854556761208	Queen3	north_america	5.87877326568069	0.785000682908611	no
LOC105199319	whole_body_queen	7.21386174328071	3.44655252614848	5.42467407126264	Queen2	north_america	8.87122659741112	0.53093603912722	no
LOC105199319	whole_body_queen	7.21386174328071	5.72268687250345	3.81889650770292	Queen4	north_america	9.54158338020637	-0.480335136083497	no
LOC105199320	whole_body_queen	7.26158348678567	3.78663517911978	1.9927278380604	Queen3	north_america	5.77936301718018	-0.677550768452699	no
LOC105199320	whole_body_queen	7.26158348678567	1.0785897038817	2.11729570267697	Queen5	north_america	3.19588540655867	0.584690003221407	no
LOC105199320	whole_body_queen	7.26158348678567	5.72268687250345	3.81889650770292	Queen4	north_america	9.54158338020637	-0.480335136083497	no
LOC105199320	whole_body_queen	7.26158348678567	0.979958630686813	1.95991726137363	Queen1	north_america	2.93987589206044	0.580086561826869	no
LOC105199320	whole_body_queen	7.26158348678567	8.37028851352876	4.05777116411809	Queen6	north_america	12.4280596776468	-0.889591704920711	no
LOC105199320	whole_body_queen	7.26158348678567	6.03146692075984	2.71233703563132	Queen2	north_america	8.74380395639116	-0.921498003246905	no
LOC105199321	whole_body_queen	3.9243961404394	0	4.77362063462865	Queen4	north_america	4.77362063462865	2.52947631600471	no
LOC105199321	whole_body_queen	3.9243961404394	0.86163813153712	4.5205617260522	Queen2	north_america	5.38219985758932	1.56824240444409	no
LOC105199321	whole_body_queen	3.9243961404394	0	0	Queen1	north_america	0	0	no
LOC105199321	whole_body_queen	3.9243961404394	1.04628606419109	2.02888558205905	Queen6	north_america	3.07517164625014	0.565779237210777	no
LOC105199321	whole_body_queen	3.9243961404394	0	0	Queen5	north_america	0	0	no
LOC105199321	whole_body_queen	3.9243961404394	0.946658794779946	7.9709113522416	Queen3	north_america	8.91757014702154	2.20425452111919	no
LOC105199322	whole_body_queen	1.50083528257431	1.72327626307424	2.71233703563132	Queen2	north_america	4.43561329870556	0.446984351629469	no
LOC105199322	whole_body_queen	1.50083528257431	0	1.01444279102952	Queen6	north_america	1.01444279102952	1.01038083439196	no
LOC105199322	whole_body_queen	1.50083528257431	0.946658794779946	0.996363919030199	Queen3	north_america	1.94302271381015	0.0363747004306876	no
LOC105199322	whole_body_queen	1.50083528257431	0	1.05864785133848	Queen5	north_america	1.05864785133848	1.04169706621221	no
LOC105199322	whole_body_queen	1.50083528257431	1.90756229083448	4.77362063462865	Queen4	north_america	6.68118292546314	0.989666216063623	no
LOC105199322	whole_body_queen	1.50083528257431	0	0.979958630686813	Queen1	north_america	0.979958630686813	0.985470286907668	no
LOC105199323	whole_body_queen	2.8672017638482	1.72327626307424	0.904112345210441	Queen2	north_america	2.62738860828468	-0.516224742049444	no
LOC105199323	whole_body_queen	2.8672017638482	2.1571794077634	1.05864785133848	Queen5	north_america	3.21582725910188	-0.616939178390645	no
LOC105199323	whole_body_queen	2.8672017638482	1.90756229083448	0	Queen4	north_america	1.90756229083448	-1.53981009994109	no
LOC105199323	whole_body_queen	2.8672017638482	2.09257212838219	1.01444279102952	Queen6	north_america	3.10701491941171	-0.618426409328933	no
LOC105199323	whole_body_queen	2.8672017638482	0.946658794779946	0.996363919030199	Queen3	north_america	1.94302271381015	0.0363747004306876	no
LOC105199323	whole_body_queen	2.8672017638482	4.89979315343406	1.95991726137363	Queen1	north_america	6.85971041480769	-0.995107525782979	no
LOC105199326	whole_body_queen	4.5535896664203	0.979958630686813	0.979958630686813	Queen1	north_america	1.95991726137363	0	no
LOC105199326	whole_body_queen	4.5535896664203	2.1571794077634	2.11729570267697	Queen5	north_america	4.27447511044037	-0.0183412309449293	no
LOC105199326	whole_body_queen	4.5535896664203	0.953781145417242	4.77362063462865	Queen4	north_america	5.72740178004589	1.56320744445304	no
LOC105199326	whole_body_queen	4.5535896664203	2.83997638433984	1.9927278380604	Queen3	north_america	4.83270422240024	-0.359636353934307	no
LOC105199326	whole_body_queen	4.5535896664203	2.09257212838219	2.02888558205905	Queen6	north_america	4.12145771044124	-0.0300201632151384	no
LOC105199326	whole_body_queen	4.5535896664203	3.44655252614848	4.5205617260522	Queen2	north_america	7.96711425220068	0.312127843029085	no
LOC105199327	whole_body_queen	16.4093033227643	9.79958630686813	5.87975178412087	Queen1	north_america	15.679338090989	-0.650547629303795	na
LOC105199327	whole_body_queen	16.4093033227643	10.4628606419109	4.05777116411809	Queen6	north_america	14.520631806029	-1.18039345457549	na
LOC105199327	whole_body_queen	16.4093033227643	8.6163813153712	3.61644938084176	Queen2	north_america	12.232830696213	-1.0587104362721	na
LOC105199327	whole_body_queen	16.4093033227643	15.1002558543438	2.11729570267697	Queen5	north_america	17.2175515570207	-2.36871669608237	na
LOC105199327	whole_body_queen	16.4093033227643	15.1465407164791	1.9927278380604	Queen3	north_america	17.1392685545395	-2.43169212104237	na
LOC105199327	whole_body_queen	16.4093033227643	14.3067171812586	5.72834476155438	Queen4	north_america	20.035061942813	-1.18584136587831	na
LOC105199328	whole_body_queen	14.16667451683	5.23143032095547	5.07221395514762	Queen6	north_america	10.3036442761031	-0.0373407226849389	no
LOC105199328	whole_body_queen	14.16667451683	5.87975178412087	6.85971041480769	Queen1	north_america	12.7394621989286	0.192119643839589	no
LOC105199328	whole_body_queen	14.16667451683	10.3396575784454	16.2740222137879	Queen2	north_america	26.6136797922334	0.607226973850613	no
LOC105199328	whole_body_queen	14.16667451683	11.4453737450069	11.4566895231088	Queen4	north_america	22.9020632681157	0.00131115385092837	no
LOC105199328	whole_body_queen	14.16667451683	6.62661156345962	8.9672752712718	Queen3	north_america	15.5938868347314	0.386156949969333	no
LOC105199328	whole_body_queen	14.16667451683	3.2357691116451	3.17594355401545	Queen5	north_america	6.41171266566055	-0.0205217401162448	no
LOC105199329	whole_body_queen	19.8572252919782	10.3396575784454	9.04112345210441	Queen2	north_america	19.3807810305498	-0.17545638174233	no
LOC105199329	whole_body_queen	19.8572252919782	7.8396690454945	7.8396690454945	Queen1	north_america	15.679338090989	0	no
LOC105199329	whole_body_queen	19.8572252919782	8.37028851352876	2.02888558205905	Queen6	north_america	10.3991740955878	-1.629306389004	no
LOC105199329	whole_body_queen	19.8572252919782	26.5064462538385	19.927278380604	Queen3	north_america	46.4337246344425	-0.394385060589079	no
LOC105199329	whole_body_queen	19.8572252919782	11.8644867426987	8.46918281070788	Queen5	north_america	20.3336695534066	-0.442082066916816	no
LOC105199329	whole_body_queen	19.8572252919782	22.8907474900138	18.1397584115889	Queen4	north_america	41.0305059016027	-0.319879373558677	no
LOC105199330	whole_body_queen	7.24954559282045	12.3991548904241	4.77362063462865	Queen4	north_america	17.1727755250528	-1.2145937889804	na
LOC105199330	whole_body_queen	7.24954559282045	9.47801944690832	4.5205617260522	Queen2	north_america	13.9985811729605	-0.924479068593021	na
LOC105199330	whole_body_queen	7.24954559282045	4.89979315343406	0.979958630686813	Queen1	north_america	5.87975178412088	-1.57519408760985	na
LOC105199330	whole_body_queen	7.24954559282045	5.23143032095547	0	Queen6	north_america	5.23143032095547	-2.63956334785734	na
LOC105199330	whole_body_queen	7.24954559282045	6.62661156345962	1.9927278380604	Queen3	north_america	8.61933940152002	-1.34958113813294	na
LOC105199330	whole_body_queen	7.24954559282045	3.2357691116451	0	Queen5	north_america	3.2357691116451	-2.08262395133143	na
LOC105199332	whole_body_queen	31.8896378981982	8.81962767618131	33.3185934433516	Queen1	north_america	42.1382211195329	1.80525019575974	na
LOC105199332	whole_body_queen	31.8896378981982	8.51992915301952	23.9127340567248	Queen3	north_america	32.4326632097443	1.38786061714023	na
LOC105199332	whole_body_queen	31.8896378981982	8.37028851352876	29.4188409398562	Queen6	north_america	37.7891294533849	1.69879980795418	na
LOC105199332	whole_body_queen	31.8896378981982	5.72268687250345	22.9133790462175	Queen4	north_america	28.636065918721	1.83070814365053	na
LOC105199332	whole_body_queen	31.8896378981982	6.03146692075984	25.3151456658923	Queen2	north_america	31.3466125866522	1.90399577664435	na
LOC105199332	whole_body_queen	31.8896378981982	6.47153822329019	20.1143091754312	Queen5	north_america	26.5858473987214	1.49874384788527	na
LOC105199334	whole_body_queen	0.988161274858506	0.86163813153712	0	Queen2	north_america	0.86163813153712	-0.896572666573614	no
LOC105199334	whole_body_queen	0.988161274858506	0	1.01444279102952	Queen6	north_america	1.01444279102952	1.01038083439196	no
LOC105199334	whole_body_queen	0.988161274858506	0	0.979958630686813	Queen1	north_america	0.979958630686813	0.985470286907668	no
LOC105199334	whole_body_queen	0.988161274858506	0	0.996363919030199	Queen3	north_america	0.996363919030199	0.997374734865391	no
LOC105199334	whole_body_queen	0.988161274858506	0	0	Queen4	north_america	0	0	no
LOC105199334	whole_body_queen	0.988161274858506	1.0785897038817	0	Queen5	north_america	1.0785897038817	-1.05560501043652	no
LOC105199335	whole_body_queen	1.0624378840364	1.04628606419109	0	Queen6	north_america	1.04628606419109	-1.03300784329498	no
LOC105199335	whole_body_queen	1.0624378840364	0.946658794779946	0	Queen3	north_america	0.946658794779946	-0.961000034434703	no
LOC105199335	whole_body_queen	1.0624378840364	1.0785897038817	0	Queen5	north_america	1.0785897038817	-1.05560501043652	no
LOC105199335	whole_body_queen	1.0624378840364	0.979958630686813	0	Queen1	north_america	0.979958630686813	-0.985470286907669	no
LOC105199335	whole_body_queen	1.0624378840364	1.72327626307424	0.904112345210441	Queen2	north_america	2.62738860828468	-0.516224742049444	no
LOC105199335	whole_body_queen	1.0624378840364	2.86134343625172	0	Queen4	north_america	2.86134343625172	-1.94910287640935	no
LOC105199336	whole_body_queen	70.2113103617461	43.944014696026	36.5199404770628	Queen6	north_america	80.4639551730888	-0.260471462203332	no
LOC105199336	whole_body_queen	70.2113103617461	28.3997638433984	31.8836454089664	Queen3	north_america	60.2834092523648	0.161565675387087	no
LOC105199336	whole_body_queen	70.2113103617461	28.6134343625172	30.5511720616234	Queen4	north_america	59.1646064241406	0.0914417853083663	no
LOC105199336	whole_body_queen	70.2113103617461	38.8292293397411	38.1113226481854	Queen5	north_america	76.9405519879266	-0.0262412398293684	no
LOC105199336	whole_body_queen	70.2113103617461	32.7422489984106	30.739819737155	Queen2	north_america	63.4820687355655	-0.0882622012017515	no
LOC105199336	whole_body_queen	70.2113103617461	43.1181797502198	37.2384279660989	Queen1	north_america	80.3566077163186	-0.20635005535042	no
LOC105199337	whole_body_queen	25.0892341372621	12.7394621989286	11.7595035682417	Queen1	north_america	24.4989657671703	-0.106753334619652	no
LOC105199337	whole_body_queen	25.0892341372621	10.785897038817	15.8797177700773	Queen5	north_america	26.6656148088943	0.518229214272698	no
LOC105199337	whole_body_queen	25.0892341372621	10.4628606419109	15.2166418654428	Queen6	north_america	25.6795025073538	0.500507973597158	no
LOC105199337	whole_body_queen	25.0892341372621	12.0629338415197	14.4657975233671	Queen2	north_america	26.5287313648867	0.243602278404154	no
LOC105199337	whole_body_queen	25.0892341372621	13.2532231269192	10.9600031093322	Queen3	north_america	24.2132262362514	-0.253070432808053	no
LOC105199337	whole_body_queen	25.0892341372621	11.4453737450069	9.5472412692573	Queen4	north_america	20.9926150142642	-0.238743858574841	no
LOC105199338	whole_body_queen	12.1036943679876	0.979958630686813	6.85971041480769	Queen1	north_america	7.8396690454945	1.98900587152822	no
LOC105199338	whole_body_queen	12.1036943679876	6.62661156345962	8.9672752712718	Queen3	north_america	15.5938868347314	0.386156949969333	no
LOC105199338	whole_body_queen	12.1036943679876	1.04628606419109	4.05777116411809	Queen6	north_america	5.10405722830919	1.30549392129407	no
LOC105199338	whole_body_queen	12.1036943679876	8.62871763105359	3.17594355401545	Queen5	north_america	11.804661185069	-1.20524145907456	no
LOC105199338	whole_body_queen	12.1036943679876	5.72268687250345	6.68306888848011	Queen4	north_america	12.4057557609836	0.192644735635941	no
LOC105199338	whole_body_queen	12.1036943679876	5.16982878922272	7.23289876168353	Queen2	north_america	12.4027275509062	0.416170030059335	no
LOC105199340	whole_body_queen	19.2540787554469	8.58403030875517	9.5472412692573	Queen4	north_america	18.1312715780125	0.13816132207808	no
LOC105199340	whole_body_queen	19.2540787554469	11.509146706102	14.2021990744133	Queen6	north_america	25.7113457805154	0.281296650403463	no
LOC105199340	whole_body_queen	19.2540787554469	10.3396575784454	15.3699098685775	Queen2	north_america	25.7095674470229	0.529669302328672	no
LOC105199340	whole_body_queen	19.2540787554469	10.4132467425794	9.963639190302	Queen3	north_america	20.3768859328814	-0.0579825000815643	no
LOC105199340	whole_body_queen	19.2540787554469	4.89979315343406	7.8396690454945	Queen1	north_america	12.7394621989286	0.583327982049209	no
LOC105199340	whole_body_queen	19.2540787554469	6.47153822329019	6.35188710803091	Queen5	north_america	12.8234253313211	-0.0232906788858242	no
LOC105199341	whole_body_queen	25.9337722567125	20.0294040537621	19.0944825385146	Queen4	north_america	39.1238865922767	-0.0656085401016146	no
LOC105199341	whole_body_queen	25.9337722567125	23.5190071364835	19.5991726137363	Queen1	north_america	43.1181797502198	-0.251314168966928	no
LOC105199341	whole_body_queen	25.9337722567125	2.1571794077634	10.5864785133848	Queen5	north_america	12.7436579211482	1.87573400392418	no
LOC105199341	whole_body_queen	25.9337722567125	1.72327626307424	2.71233703563132	Queen2	north_america	4.43561329870556	0.446984351629469	no
LOC105199341	whole_body_queen	25.9337722567125	29.2960097973506	10.1444279102952	Queen6	north_america	39.4404377076459	-1.44280523390593	no
LOC105199341	whole_body_queen	25.9337722567125	7.57327035823957	2.9890917570906	Queen3	north_america	10.5623621153302	-1.10378533085282	no
LOC105199342	whole_body_queen	22.7214988684647	11.509146706102	13.1877562833838	Queen6	north_america	24.6969029894858	0.181663071609116	no
LOC105199342	whole_body_queen	22.7214988684647	7.8396690454945	14.6993794603022	Queen1	north_america	22.5390485057967	0.828643274046618	no
LOC105199342	whole_body_queen	22.7214988684647	11.3599055373594	15.9418227044832	Queen3	north_america	27.3017282418425	0.454921379693616	no
LOC105199342	whole_body_queen	22.7214988684647	9.53781145417242	13.3661377769602	Queen4	north_america	22.9039492311326	0.447096984815575	no
LOC105199342	whole_body_queen	22.7214988684647	7.75474318383408	9.94523579731485	Queen2	north_america	17.6999789811489	0.322166271743887	no
LOC105199342	whole_body_queen	22.7214988684647	6.47153822329019	12.7037742160618	Queen5	north_america	19.175312439352	0.875096089349801	no
LOC105199343	whole_body_queen	20.6679632435935	10.3396575784454	14.4657975233671	Queen2	north_america	24.8054551018125	0.447704154527653	no
LOC105199343	whole_body_queen	20.6679632435935	5.87975178412087	11.7595035682417	Queen1	north_america	17.6392553523626	0.891143779803867	no
LOC105199343	whole_body_queen	20.6679632435935	9.46658794779946	8.9672752712718	Queen3	north_america	18.4338632190713	-0.0705201302211819	no
LOC105199343	whole_body_queen	20.6679632435935	6.47153822329019	6.35188710803091	Queen5	north_america	12.8234253313211	-0.0232906788858242	no
LOC105199343	whole_body_queen	20.6679632435935	11.4453737450069	11.4566895231088	Queen4	north_america	22.9020632681157	0.00131115385092837	no
LOC105199343	whole_body_queen	20.6679632435935	15.6942909628664	19.2744130295609	Queen6	north_america	34.9687039924274	0.280305326362941	no
LOC105199345	whole_body_queen	22.0225042210578	11.4453737450069	21.0039307923661	Queen4	north_america	32.449304537373	0.822151714170434	no
LOC105199345	whole_body_queen	22.0225042210578	15.6942909628664	16.2310846564724	Queen6	north_america	31.9253756193388	0.0456586978996228	no
LOC105199345	whole_body_queen	22.0225042210578	6.47153822329019	11.6451263647233	Queen5	north_america	18.1166645880135	0.759104256671401	no
LOC105199345	whole_body_queen	22.0225042210578	4.89979315343406	18.6192139830494	Queen1	north_america	23.5190071364835	1.73353096348296	no
LOC105199345	whole_body_queen	22.0225042210578	7.57327035823957	12.9527309473926	Queen3	north_america	20.5260013056322	0.702629981615029	no
LOC105199345	whole_body_queen	22.0225042210578	4.3081906576856	8.13701110689397	Queen2	north_america	12.4452017645796	0.783502119155171	no
LOC105199346	whole_body_queen	1.9342112668583	0.979958630686813	0.979958630686813	Queen1	north_america	1.95991726137363	0	no
LOC105199346	whole_body_queen	1.9342112668583	0.86163813153712	0.904112345210441	Queen2	north_america	1.76575047674756	0.0325459355472472	no
LOC105199346	whole_body_queen	1.9342112668583	0	1.01444279102952	Queen6	north_america	1.01444279102952	1.01038083439196	no
LOC105199346	whole_body_queen	1.9342112668583	1.0785897038817	1.05864785133848	Queen5	north_america	2.13723755522018	-0.0139079442243087	no
LOC105199346	whole_body_queen	1.9342112668583	0.946658794779946	1.9927278380604	Queen3	north_america	2.93938663284035	0.620461050103316	no
LOC105199346	whole_body_queen	1.9342112668583	0.953781145417242	0.95472412692573	Queen4	north_america	1.90850527234297	0.00069614068680925	no
LOC105199348	whole_body_queen	3.46201273204883	2.09257212838219	1.01444279102952	Queen6	north_america	3.10701491941171	-0.618426409328933	no
LOC105199348	whole_body_queen	3.46201273204883	1.0785897038817	0	Queen5	north_america	1.0785897038817	-1.05560501043652	no
LOC105199348	whole_body_queen	3.46201273204883	4.3081906576856	0.904112345210441	Queen2	north_america	5.21230300289604	-1.47910158772019	no
LOC105199348	whole_body_queen	3.46201273204883	0.946658794779946	0.996363919030199	Queen3	north_america	1.94302271381015	0.0363747004306876	no
LOC105199348	whole_body_queen	3.46201273204883	1.90756229083448	1.90944825385146	Queen4	north_america	3.81701054468594	0.000935487246009695	no
LOC105199348	whole_body_queen	3.46201273204883	1.95991726137363	2.93987589206044	Queen1	north_america	4.89979315343406	0.41259333609204	no
LOC105199349	whole_body_queen	2.0989832052204	0.946658794779946	0.996363919030199	Queen3	north_america	1.94302271381015	0.0363747004306876	no
LOC105199349	whole_body_queen	2.0989832052204	1.04628606419109	1.01444279102952	Queen6	north_america	2.06072885522062	-0.0226270089030178	no
LOC105199349	whole_body_queen	2.0989832052204	2.93987589206044	2.93987589206044	Queen1	north_america	5.87975178412087	0	no
LOC105199349	whole_body_queen	2.0989832052204	0.86163813153712	0.904112345210441	Queen2	north_america	1.76575047674756	0.0325459355472472	no
LOC105199349	whole_body_queen	2.0989832052204	1.90756229083448	0.95472412692573	Queen4	north_america	2.86228641776021	-0.57284508770261	no
LOC105199349	whole_body_queen	2.0989832052204	1.0785897038817	1.05864785133848	Queen5	north_america	2.13723755522018	-0.0139079442243087	no
LOC105199351	whole_body_queen	27.0398155607555	15.679338090989	16.6592967216758	Queen1	north_america	32.3386348126648	0.0823658515833089	no
LOC105199351	whole_body_queen	27.0398155607555	14.6480048986753	13.1877562833838	Queen6	north_america	27.8357611820591	-0.141332273994331	no
LOC105199351	whole_body_queen	27.0398155607555	12.3065643321393	13.9490948664228	Queen3	north_america	26.2556591985621	0.167920010267847	no
LOC105199351	whole_body_queen	27.0398155607555	13.7862101045939	11.7534604877357	Queen2	north_america	25.5396705923296	-0.213363561589391	no
LOC105199351	whole_body_queen	27.0398155607555	11.4453737450069	13.3661377769602	Queen4	north_america	24.8115115219671	0.207062700407331	no
LOC105199351	whole_body_queen	27.0398155607555	16.1788455582255	11.6451263647233	Queen5	north_america	27.8239719229488	-0.442051634515772	no
LOC105199354	whole_body_queen	10.0004479970326	5.67995276867968	3.9854556761208	Queen3	north_america	9.66540844480047	-0.422112527445519	no
LOC105199354	whole_body_queen	10.0004479970326	7.63024916333793	9.5472412692573	Queen4	north_america	17.1774904325952	0.289391580667435	no
LOC105199354	whole_body_queen	10.0004479970326	10.3396575784454	11.7534604877357	Queen2	north_america	22.0931180661812	0.16951168083473	no
LOC105199354	whole_body_queen	10.0004479970326	0.979958630686813	0.979958630686813	Queen1	north_america	1.95991726137363	0	no
LOC105199354	whole_body_queen	10.0004479970326	2.1571794077634	1.05864785133848	Queen5	north_america	3.21582725910188	-0.616939178390645	no
LOC105199354	whole_body_queen	10.0004479970326	6.27771638514657	4.05777116411809	Queen6	north_america	10.3354875492647	-0.524984065415039	no
LOC105199355	whole_body_queen	2.92290318798673	0	0.95472412692573	Queen4	north_america	0.95472412692573	0.966965012238482	no
LOC105199355	whole_body_queen	2.92290318798673	0	3.17594355401545	Queen5	north_america	3.17594355401545	2.06210221121518	no
LOC105199355	whole_body_queen	2.92290318798673	0.86163813153712	1.80822469042088	Queen2	north_america	2.669862821958	0.593085705958935	no
LOC105199355	whole_body_queen	2.92290318798673	1.04628606419109	3.04332837308857	Queen6	north_america	4.08961443727966	0.982535531471878	no
LOC105199355	whole_body_queen	2.92290318798673	0.979958630686813	2.93987589206044	Queen1	north_america	3.91983452274725	0.992679897918909	no
LOC105199355	whole_body_queen	2.92290318798673	0.946658794779946	0.996363919030199	Queen3	north_america	1.94302271381015	0.0363747004306876	no
LOC105199356	whole_body_queen	2.80486935700922	0.86163813153712	1.80822469042088	Queen2	north_america	2.669862821958	0.593085705958935	no
LOC105199356	whole_body_queen	2.80486935700922	0.946658794779946	2.9890917570906	Queen3	north_america	3.93575055187054	1.03506027424409	no
LOC105199356	whole_body_queen	2.80486935700922	1.04628606419109	3.04332837308857	Queen6	north_america	4.08961443727966	0.982535531471878	no
LOC105199356	whole_body_queen	2.80486935700922	0.979958630686813	1.95991726137363	Queen1	north_america	2.93987589206044	0.580086561826869	no
LOC105199356	whole_body_queen	2.80486935700922	1.0785897038817	1.05864785133848	Queen5	north_america	2.13723755522018	-0.0139079442243087	no
LOC105199356	whole_body_queen	2.80486935700922	0	1.90944825385146	Queen4	north_america	1.90944825385146	1.5407455871871	no
LOC105199358	whole_body_queen	1.02132499161065	0	0.996363919030199	Queen3	north_america	0.996363919030199	0.997374734865391	no
LOC105199358	whole_body_queen	1.02132499161065	0	0.904112345210441	Queen2	north_america	0.904112345210441	0.929118602120862	no
LOC105199358	whole_body_queen	1.02132499161065	1.04628606419109	0	Queen6	north_america	1.04628606419109	-1.03300784329498	no
LOC105199358	whole_body_queen	1.02132499161065	0.979958630686813	0.979958630686813	Queen1	north_america	1.95991726137363	0	no
LOC105199358	whole_body_queen	1.02132499161065	1.0785897038817	1.05864785133848	Queen5	north_america	2.13723755522018	-0.0139079442243087	no
LOC105199358	whole_body_queen	1.02132499161065	0	0	Queen4	north_america	0	0	no
LOC105199473	whole_body_queen	2.98465066858596	1.90756229083448	0.95472412692573	Queen4	north_america	2.86228641776021	-0.57284508770261	no
LOC105199473	whole_body_queen	2.98465066858596	1.0785897038817	2.11729570267697	Queen5	north_america	3.19588540655867	0.584690003221407	no
LOC105199473	whole_body_queen	2.98465066858596	0.86163813153712	0.904112345210441	Queen2	north_america	1.76575047674756	0.0325459355472472	no
LOC105199473	whole_body_queen	2.98465066858596	2.93987589206044	1.95991726137363	Queen1	north_america	4.89979315343406	-0.41259333609204	no
LOC105199473	whole_body_queen	2.98465066858596	0	0.996363919030199	Queen3	north_america	0.996363919030199	0.997374734865391	no
LOC105199473	whole_body_queen	2.98465066858596	2.09257212838219	1.01444279102952	Queen6	north_america	3.10701491941171	-0.618426409328933	no
LOC105199484	whole_body_queen	2.62830713088964	2.93987589206044	0.979958630686813	Queen1	north_america	3.91983452274725	-0.992679897918909	no
LOC105199484	whole_body_queen	2.62830713088964	1.90756229083448	1.90944825385146	Queen4	north_america	3.81701054468594	0.000935487246009695	no
LOC105199484	whole_body_queen	2.62830713088964	1.04628606419109	1.01444279102952	Queen6	north_america	2.06072885522062	-0.0226270089030178	no
LOC105199484	whole_body_queen	2.62830713088964	0.86163813153712	0.904112345210441	Queen2	north_america	1.76575047674756	0.0325459355472472	no
LOC105199484	whole_body_queen	2.62830713088964	0	0.996363919030199	Queen3	north_america	0.996363919030199	0.997374734865391	no
LOC105199484	whole_body_queen	2.62830713088964	1.0785897038817	2.11729570267697	Queen5	north_america	3.19588540655867	0.584690003221407	no
LOC105199492	whole_body_queen	19.1501244339341	9.41657457771985	9.12998511926571	Queen6	north_america	18.5465596969856	-0.040248879943521	no
LOC105199492	whole_body_queen	19.1501244339341	8.62871763105359	10.5864785133848	Queen5	north_america	19.2151961444384	0.267026578237293	no
LOC105199492	whole_body_queen	19.1501244339341	7.75474318383408	9.94523579731485	Queen2	north_america	17.6999789811489	0.322166271743887	no
LOC105199492	whole_body_queen	19.1501244339341	9.53781145417242	9.5472412692573	Queen4	north_america	19.0850527234297	0.00129042583340202	no
LOC105199492	whole_body_queen	19.1501244339341	14.6993794603022	10.7795449375549	Queen1	north_america	25.4789243978571	-0.414423729071509	no
LOC105199492	whole_body_queen	19.1501244339341	13.2532231269192	8.9672752712718	Queen3	north_america	22.220498398191	-0.516017119659496	no
LOC105199531	whole_body_queen	34.7057614247497	12.5554327702931	20.2888558205905	Queen6	north_america	32.8442885908836	0.651227240216584	na
LOC105199531	whole_body_queen	34.7057614247497	5.87975178412087	11.7595035682417	Queen1	north_america	17.6392553523626	0.891143779803867	na
LOC105199531	whole_body_queen	34.7057614247497	13.3529360358414	50.6003787270637	Queen4	north_america	63.9533147629051	1.84603576980628	na
LOC105199531	whole_body_queen	34.7057614247497	15.5094863676682	27.1233703563132	Queen2	north_america	42.6328567239814	0.768474263226817	na
LOC105199531	whole_body_queen	34.7057614247497	5.39294851940849	19.0556613240927	Queen5	north_america	24.4486098435012	1.64945615760065	na
LOC105199531	whole_body_queen	34.7057614247497	5.67995276867968	30.8872814899362	Queen3	north_america	36.5672342586159	2.25507130056374	na
LOC105199549	whole_body_queen	3.53066680125084	3.2357691116451	2.11729570267697	Queen5	north_america	5.35306481432206	-0.4423289376735	no
LOC105199549	whole_body_queen	3.53066680125084	2.58491439461136	1.80822469042088	Queen2	north_america	4.39313908503224	-0.352280296200982	no
LOC105199549	whole_body_queen	3.53066680125084	0.946658794779946	0.996363919030199	Queen3	north_america	1.94302271381015	0.0363747004306876	no
LOC105199549	whole_body_queen	3.53066680125084	1.90756229083448	0.95472412692573	Queen4	north_america	2.86228641776021	-0.57284508770261	no
LOC105199549	whole_body_queen	3.53066680125084	2.09257212838219	2.02888558205905	Queen6	north_america	4.12145771044124	-0.0300201632151384	no
LOC105199549	whole_body_queen	3.53066680125084	1.95991726137363	0.979958630686813	Queen1	north_america	2.93987589206044	-0.58008656182687	no
LOC105199559	whole_body_queen	1.93468275761254	1.0785897038817	1.05864785133848	Queen5	north_america	2.13723755522018	-0.0139079442243087	no
LOC105199559	whole_body_queen	1.93468275761254	0	1.95991726137363	Queen1	north_america	1.95991726137363	1.56555684873454	no
LOC105199559	whole_body_queen	1.93468275761254	0	0.996363919030199	Queen3	north_america	0.996363919030199	0.997374734865391	no
LOC105199559	whole_body_queen	1.93468275761254	0	1.80822469042088	Queen2	north_america	1.80822469042088	1.48965837253255	no
LOC105199559	whole_body_queen	1.93468275761254	0	1.90944825385146	Queen4	north_america	1.90944825385146	1.5407455871871	no
LOC105199559	whole_body_queen	1.93468275761254	2.09257212838219	2.02888558205905	Queen6	north_america	4.12145771044124	-0.0300201632151384	no
LOC105199565	whole_body_queen	16.368677413832	6.27771638514657	8.11554232823618	Queen6	north_america	14.3932587133828	0.324842661804102	no
LOC105199565	whole_body_queen	16.368677413832	11.3599055373594	11.9563670283624	Queen3	north_america	23.3162725657217	0.0679935252871418	no
LOC105199565	whole_body_queen	16.368677413832	5.87975178412087	9.79958630686813	Queen1	north_america	15.679338090989	0.650547629303795	no
LOC105199565	whole_body_queen	16.368677413832	9.47801944690832	11.7534604877357	Queen2	north_america	21.231479934644	0.28352271225241	no
LOC105199565	whole_body_queen	16.368677413832	6.47153822329019	10.5864785133848	Queen5	north_america	17.058016736675	0.632964956160951	no
LOC105199565	whole_body_queen	16.368677413832	3.81512458166897	8.59251714233157	Queen4	north_america	12.4076417240005	0.994336312616494	no
LOC105199580	whole_body_queen	1.85438659527885	1.04628606419109	1.01444279102952	Queen6	north_america	2.06072885522062	-0.0226270089030178	no
LOC105199580	whole_body_queen	1.85438659527885	0.946658794779946	0.996363919030199	Queen3	north_america	1.94302271381015	0.0363747004306876	no
LOC105199580	whole_body_queen	1.85438659527885	0.86163813153712	0.904112345210441	Queen2	north_america	1.76575047674756	0.0325459355472472	no
LOC105199580	whole_body_queen	1.85438659527885	0.953781145417242	0	Queen4	north_america	0.953781145417242	-0.966268871551673	no
LOC105199580	whole_body_queen	1.85438659527885	0.979958630686813	0.979958630686813	Queen1	north_america	1.95991726137363	0	no
LOC105199580	whole_body_queen	1.85438659527885	1.0785897038817	0	Queen5	north_america	1.0785897038817	-1.05560501043652	no
LOC105199591	whole_body_queen	10.7621611307714	2.58491439461136	4.5205617260522	Queen2	north_america	7.10547612066356	0.622876402284176	no
LOC105199591	whole_body_queen	10.7621611307714	3.91983452274725	7.8396690454945	Queen1	north_america	11.7595035682418	0.845382564828784	no
LOC105199591	whole_body_queen	10.7621611307714	3.78663517911978	5.9781835141812	Queen3	north_america	9.76481869330098	0.543839685429763	no
LOC105199591	whole_body_queen	10.7621611307714	3.81512458166897	3.81889650770292	Queen4	north_america	7.63402108937189	0.00112969220460692	no
LOC105199591	whole_body_queen	10.7621611307714	7.55012792717189	7.41053495936939	Queen5	north_america	14.9606628865413	-0.023748438521824	no
LOC105199591	whole_body_queen	10.7621611307714	5.23143032095547	7.10109953720666	Queen6	north_america	12.3325298581621	0.378554385969408	no
LOC105199601	whole_body_queen	30.9469087789785	17.986517100819	11.9563670283624	Queen3	north_america	29.9428841291814	-0.551314038297263	no
LOC105199601	whole_body_queen	30.9469087789785	17.7868630912486	14.2021990744133	Queen6	north_america	31.9890621656619	-0.305444163145972	no
LOC105199601	whole_body_queen	30.9469087789785	12.7394621989286	18.6192139830494	Queen1	north_america	31.358676181978	0.513941708980655	no
LOC105199601	whole_body_queen	30.9469087789785	18.3360249659889	8.46918281070788	Queen5	north_america	26.8052077766967	-1.02997940919717	no
LOC105199601	whole_body_queen	30.9469087789785	16.2142794720931	14.320861903886	Queen4	north_america	30.5351413759791	-0.168108335071806	no
LOC105199601	whole_body_queen	30.9469087789785	17.2327626307424	14.4657975233671	Queen2	north_america	31.6985601541095	-0.237451944625229	no
LOC105199609	whole_body_queen	1.05246695776479	0	1.05864785133848	Queen5	north_america	1.05864785133848	1.04169706621221	no
LOC105199609	whole_body_queen	1.05246695776479	1.04628606419109	0	Queen6	north_america	1.04628606419109	-1.03300784329498	no
LOC105199609	whole_body_queen	1.05246695776479	0.86163813153712	0.904112345210441	Queen2	north_america	1.76575047674756	0.0325459355472472	no
LOC105199609	whole_body_queen	1.05246695776479	0	0.95472412692573	Queen4	north_america	0.95472412692573	0.966965012238482	no
LOC105199609	whole_body_queen	1.05246695776479	0.979958630686813	0	Queen1	north_america	0.979958630686813	-0.985470286907669	no
LOC105199609	whole_body_queen	1.05246695776479	0.946658794779946	0.996363919030199	Queen3	north_america	1.94302271381015	0.0363747004306876	no
LOC105199617	whole_body_queen	4.6881174635053	10.4132467425794	3.9854556761208	Queen3	north_america	14.3987024187002	-1.19491197585501	no
LOC105199617	whole_body_queen	4.6881174635053	3.44655252614848	1.80822469042088	Queen2	north_america	5.25477721656936	-0.663028855456073	no
LOC105199617	whole_body_queen	4.6881174635053	2.09257212838219	2.02888558205905	Queen6	north_america	4.12145771044124	-0.0300201632151384	no
LOC105199617	whole_body_queen	4.6881174635053	1.90756229083448	1.90944825385146	Queen4	north_america	3.81701054468594	0.000935487246009695	no
LOC105199617	whole_body_queen	4.6881174635053	5.87975178412087	2.93987589206044	Queen1	north_america	8.81962767618131	-0.804206329769722	no
LOC105199617	whole_body_queen	4.6881174635053	1.0785897038817	1.05864785133848	Queen5	north_america	2.13723755522018	-0.0139079442243087	no
LOC105199655	whole_body_queen	3.14549945267601	1.04628606419109	2.02888558205905	Queen6	north_america	3.07517164625014	0.565779237210777	no
LOC105199655	whole_body_queen	3.14549945267601	1.90756229083448	0.95472412692573	Queen4	north_america	2.86228641776021	-0.57284508770261	no
LOC105199655	whole_body_queen	3.14549945267601	2.83997638433984	2.9890917570906	Queen3	north_america	5.82906814143044	0.0549628702064705	no
LOC105199655	whole_body_queen	3.14549945267601	2.1571794077634	1.05864785133848	Queen5	north_america	3.21582725910188	-0.616939178390645	no
LOC105199655	whole_body_queen	3.14549945267601	0.86163813153712	1.80822469042088	Queen2	north_america	2.669862821958	0.593085705958935	no
LOC105199655	whole_body_queen	3.14549945267601	0.979958630686813	3.91983452274725	Queen1	north_america	4.89979315343406	1.31313950483027	no
LOC105199708	whole_body_queen	14.9308875554429	4.76890572708621	6.68306888848011	Queen4	north_america	11.4519746155663	0.413385001604332	no
LOC105199708	whole_body_queen	14.9308875554429	6.03146692075984	8.13701110689397	Queen2	north_america	14.1684780276538	0.377896609949547	no
LOC105199708	whole_body_queen	14.9308875554429	8.37028851352876	9.12998511926571	Queen6	north_america	17.5002736327945	0.112466680229647	no
LOC105199708	whole_body_queen	14.9308875554429	8.81962767618131	9.79958630686813	Queen1	north_america	18.6192139830494	0.137235819961966	no
LOC105199708	whole_body_queen	14.9308875554429	5.39294851940849	8.46918281070788	Queen5	north_america	13.8621313301164	0.566758450387375	no
LOC105199708	whole_body_queen	14.9308875554429	4.73329397389973	10.9600031093322	Queen3	north_america	15.6932970832319	1.06078160455884	no
LOC105199719	whole_body_queen	72.888360287653	32.4285589441862	38.1889650770292	Queen4	north_america	70.6175240212154	0.229366310144586	no
LOC105199719	whole_body_queen	72.888360287653	33.6038871299477	40.6850555344698	Queen2	north_america	74.2889426644175	0.268596149237352	no
LOC105199719	whole_body_queen	72.888360287653	39.7596693807577	40.8509206802382	Queen3	north_america	80.6105900609959	0.0381170118061237	no
LOC105199719	whole_body_queen	72.888360287653	20.9257212838219	41.5921544322104	Queen6	north_america	62.5178757160323	0.957963403995923	no
LOC105199719	whole_body_queen	72.888360287653	30.2005117086876	41.2872662022009	Queen5	north_america	71.4877779108885	0.438653605251597	no
LOC105199719	whole_body_queen	72.888360287653	47.038014272967	34.2985520740384	Queen1	north_america	81.3365663470054	-0.444567509999387	no
LOC105199727	whole_body_queen	1.84159676222393	1.72327626307424	0	Queen2	north_america	1.72327626307424	-1.44534334417031	no
LOC105199727	whole_body_queen	1.84159676222393	0.953781145417242	0	Queen4	north_america	0.953781145417242	-0.966268871551673	no
LOC105199727	whole_body_queen	1.84159676222393	5.67995276867968	1.9927278380604	Queen3	north_america	7.67268060674008	-1.15837681746782	no
LOC105199727	whole_body_queen	1.84159676222393	0.979958630686813	0.979958630686813	Queen1	north_america	1.95991726137363	0	no
LOC105199727	whole_body_queen	1.84159676222393	1.04628606419109	0	Queen6	north_america	1.04628606419109	-1.03300784329498	no
LOC105199727	whole_body_queen	1.84159676222393	3.2357691116451	1.05864785133848	Queen5	north_america	4.29441696298358	-1.04092688511922	no
LOC105199739	whole_body_queen	0.966869888052027	0.86163813153712	0	Queen2	north_america	0.86163813153712	-0.896572666573614	no
LOC105199739	whole_body_queen	0.966869888052027	0.953781145417242	0	Queen4	north_america	0.953781145417242	-0.966268871551673	no
LOC105199739	whole_body_queen	0.966869888052027	1.0785897038817	0	Queen5	north_america	1.0785897038817	-1.05560501043652	no
LOC105199739	whole_body_queen	0.966869888052027	1.04628606419109	0	Queen6	north_america	1.04628606419109	-1.03300784329498	no
LOC105199739	whole_body_queen	0.966869888052027	0.979958630686813	0	Queen1	north_america	0.979958630686813	-0.985470286907669	no
LOC105199739	whole_body_queen	0.966869888052027	0.946658794779946	0	Queen3	north_america	0.946658794779946	-0.961000034434703	no
LOC105199746	whole_body_queen	2.62212623731595	0.979958630686813	0	Queen1	north_america	0.979958630686813	-0.985470286907669	no
LOC105199746	whole_body_queen	2.62212623731595	2.09257212838219	1.01444279102952	Queen6	north_america	3.10701491941171	-0.618426409328933	no
LOC105199746	whole_body_queen	2.62212623731595	2.86134343625172	4.77362063462865	Queen4	north_america	7.63496407088038	0.580373439595362	no
LOC105199746	whole_body_queen	2.62212623731595	1.0785897038817	1.05864785133848	Queen5	north_america	2.13723755522018	-0.0139079442243087	no
LOC105199746	whole_body_queen	2.62212623731595	3.78663517911978	1.9927278380604	Queen3	north_america	5.77936301718018	-0.677550768452699	no
LOC105199746	whole_body_queen	2.62212623731595	0	1.80822469042088	Queen2	north_america	1.80822469042088	1.48965837253255	no
LOC105199756	whole_body_queen	7.19254119629039	1.04628606419109	10.1444279102952	Queen6	north_america	11.1907139744863	2.44524281057102	na
LOC105199756	whole_body_queen	7.19254119629039	0.979958630686813	6.85971041480769	Queen1	north_america	7.8396690454945	1.98900587152822	na
LOC105199756	whole_body_queen	7.19254119629039	0	5.42467407126264	Queen2	north_america	5.42467407126264	2.68362326711584	na
LOC105199756	whole_body_queen	7.19254119629039	0	7.41053495936939	Queen5	north_america	7.41053495936939	3.07219756726803	na
LOC105199756	whole_body_queen	7.19254119629039	0	3.81889650770292	Queen4	north_america	3.81889650770292	2.26870281759024	na
LOC105199756	whole_body_queen	7.19254119629039	0	6.9745474332114	Queen3	north_america	6.9745474332114	2.99540264622695	na
LOC105199767	whole_body_queen	13.3382761227239	6.89310505229696	7.23289876168353	Queen2	north_america	14.1260038139805	0.0608075349407323	no
LOC105199767	whole_body_queen	13.3382761227239	2.83997638433984	1.9927278380604	Queen3	north_america	4.83270422240024	-0.359636353934307	no
LOC105199767	whole_body_queen	13.3382761227239	4.76890572708621	8.59251714233157	Queen4	north_america	13.3614228694178	0.73361175029678	no
LOC105199767	whole_body_queen	13.3382761227239	1.95991726137363	4.89979315343406	Queen1	north_america	6.85971041480769	0.995107525782979	no
LOC105199767	whole_body_queen	13.3382761227239	6.47153822329019	7.41053495936939	Queen5	north_america	13.8820731826596	0.170792274901944	no
LOC105199767	whole_body_queen	13.3382761227239	4.18514425676438	9.12998511926571	Queen6	north_america	13.3151293760301	0.966176022682876	no
LOC105199780	whole_body_queen	6.74426918486584	3.44655252614848	6.32878641647309	Queen2	north_america	9.77533894262156	0.72088709235011	no
LOC105199780	whole_body_queen	6.74426918486584	1.95991726137363	2.93987589206044	Queen1	north_america	4.89979315343406	0.41259333609204	no
LOC105199780	whole_body_queen	6.74426918486584	5.67995276867968	5.9781835141812	Queen3	north_america	11.6581362828609	0.0630136364146419	no
LOC105199780	whole_body_queen	6.74426918486584	2.09257212838219	2.02888558205905	Queen6	north_america	4.12145771044124	-0.0300201632151384	no
LOC105199780	whole_body_queen	6.74426918486584	2.1571794077634	2.11729570267697	Queen5	north_america	4.27447511044037	-0.0183412309449293	no
LOC105199780	whole_body_queen	6.74426918486584	3.81512458166897	4.77362063462865	Queen4	north_america	8.58874521629762	0.261903190619083	no
LOC105199786	whole_body_queen	3.68392062843258	2.93987589206044	3.91983452274725	Queen1	north_america	6.85971041480769	0.320459606911364	no
LOC105199786	whole_body_queen	3.68392062843258	2.1571794077634	0	Queen5	north_america	2.1571794077634	-1.65863624460286	no
LOC105199786	whole_body_queen	3.68392062843258	0.953781145417242	0	Queen4	north_america	0.953781145417242	-0.966268871551673	no
LOC105199786	whole_body_queen	3.68392062843258	2.83997638433984	0.996363919030199	Queen3	north_america	3.83634030337004	-0.943722703606935	no
LOC105199786	whole_body_queen	3.68392062843258	4.18514425676438	2.02888558205905	Queen6	north_america	6.21402983882342	-0.775597046550775	no
LOC105199786	whole_body_queen	3.68392062843258	1.72327626307424	1.80822469042088	Queen2	north_america	3.53150095349512	0.0443150283622435	no
LOC105199789	whole_body_queen	5.76167497968278	4.31435881552679	1.05864785133848	Queen5	north_america	5.37300666686528	-1.36819857296452	no
LOC105199789	whole_body_queen	5.76167497968278	3.81512458166897	0.95472412692573	Queen4	north_america	4.7698487085947	-1.30060811314715	no
LOC105199789	whole_body_queen	5.76167497968278	5.67995276867968	0.996363919030199	Queen3	north_america	6.67631668770988	-1.74246316714045	no
LOC105199789	whole_body_queen	5.76167497968278	2.09257212838219	4.05777116411809	Queen6	north_america	6.15034329250028	0.709694520868154	no
LOC105199789	whole_body_queen	5.76167497968278	5.16982878922272	1.80822469042088	Queen2	north_america	6.9780534796436	-1.13557208307124	no
LOC105199789	whole_body_queen	5.76167497968278	3.91983452274725	0	Queen1	north_america	3.91983452274725	-2.29860979173794	no
LOC105199797	whole_body_queen	26.2699480159599	14.6993794603022	14.6993794603022	Queen1	north_america	29.3987589206044	0	no
LOC105199797	whole_body_queen	26.2699480159599	13.2532231269192	15.9418227044832	Queen3	north_america	29.1950458314024	0.249300899528007	no
LOC105199797	whole_body_queen	26.2699480159599	17.1680606175103	6.68306888848011	Queen4	north_america	23.8511295059905	-1.24164983027738	no
LOC105199797	whole_body_queen	26.2699480159599	15.1002558543438	10.5864785133848	Queen5	north_america	25.6867343677286	-0.474641461213262	no
LOC105199797	whole_body_queen	26.2699480159599	15.6942909628664	11.1588707013248	Queen6	north_america	26.8531616641912	-0.457345581266294	no
LOC105199797	whole_body_queen	26.2699480159599	6.89310505229696	14.4657975233671	Queen2	north_america	21.358902575664	0.970416374833665	no
LOC105199803	whole_body_queen	3.55785996465296	2.58491439461136	1.80822469042088	Queen2	north_america	4.39313908503224	-0.352280296200982	no
LOC105199803	whole_body_queen	3.55785996465296	0.979958630686813	2.93987589206044	Queen1	north_america	3.91983452274725	0.992679897918909	no
LOC105199803	whole_body_queen	3.55785996465296	1.0785897038817	2.11729570267697	Queen5	north_america	3.19588540655867	0.584690003221407	no
LOC105199803	whole_body_queen	3.55785996465296	0.953781145417242	1.90944825385146	Queen4	north_america	2.8632293992687	0.574476715635429	no
LOC105199803	whole_body_queen	3.55785996465296	1.89331758955989	0.996363919030199	Queen3	north_america	2.88968150859009	-0.535349956786319	no
LOC105199803	whole_body_queen	3.55785996465296	3.13885819257328	3.04332837308857	Queen6	north_america	6.18218656566185	-0.0336894443797355	no
LOC105199810	whole_body_queen	3.87177999885948	1.0785897038817	3.17594355401545	Queen5	north_america	4.25453325789715	1.00649720077866	no
LOC105199810	whole_body_queen	3.87177999885948	2.09257212838219	5.07221395514762	Queen6	north_america	7.1647860835298	0.973415381451508	no
LOC105199810	whole_body_queen	3.87177999885948	1.95991726137363	4.89979315343406	Queen1	north_america	6.85971041480769	0.995107525782979	no
LOC105199810	whole_body_queen	3.87177999885948	0	0.996363919030199	Queen3	north_america	0.996363919030199	0.997374734865391	no
LOC105199810	whole_body_queen	3.87177999885948	1.90756229083448	0	Queen4	north_america	1.90756229083448	-1.53981009994109	no
LOC105199810	whole_body_queen	3.87177999885948	2.58491439461136	0.904112345210441	Queen2	north_america	3.4890267398218	-0.912820066612669	no
LOC105199816	whole_body_queen	1.51925348262766	1.0785897038817	0	Queen5	north_america	1.0785897038817	-1.05560501043652	no
LOC105199816	whole_body_queen	1.51925348262766	1.72327626307424	0.904112345210441	Queen2	north_america	2.62738860828468	-0.516224742049444	no
LOC105199816	whole_body_queen	1.51925348262766	0	0.996363919030199	Queen3	north_america	0.996363919030199	0.997374734865391	no
LOC105199816	whole_body_queen	1.51925348262766	1.04628606419109	1.01444279102952	Queen6	north_america	2.06072885522062	-0.0226270089030178	no
LOC105199816	whole_body_queen	1.51925348262766	0.979958630686813	0.979958630686813	Queen1	north_america	1.95991726137363	0	no
LOC105199816	whole_body_queen	1.51925348262766	0	0.95472412692573	Queen4	north_america	0.95472412692573	0.966965012238482	no
LOC105199837	whole_body_queen	0.950219970098594	0.946658794779946	0	Queen3	north_america	0.946658794779946	-0.961000034434703	no
LOC105199837	whole_body_queen	0.950219970098594	0	0	Queen5	north_america	0	0	no
LOC105199837	whole_body_queen	0.950219970098594	0	0.979958630686813	Queen1	north_america	0.979958630686813	0.985470286907668	no
LOC105199837	whole_body_queen	0.950219970098594	0	0	Queen2	north_america	0	0	no
LOC105199837	whole_body_queen	0.950219970098594	2.09257212838219	0	Queen6	north_america	2.09257212838219	-1.6288072437209	no
LOC105199837	whole_body_queen	0.950219970098594	0.953781145417242	0	Queen4	north_america	0.953781145417242	-0.966268871551673	no
LOC105199861	whole_body_queen	4.10720412528689	5.67995276867968	0	Queen3	north_america	5.67995276867968	-2.73983790200584	na
LOC105199861	whole_body_queen	4.10720412528689	12.5554327702931	0	Queen6	north_america	12.5554327702931	-3.76079926823186	na
LOC105199861	whole_body_queen	4.10720412528689	0.979958630686813	0	Queen1	north_america	0.979958630686813	-0.985470286907669	na
LOC105199861	whole_body_queen	4.10720412528689	2.86134343625172	0	Queen4	north_america	2.86134343625172	-1.94910287640935	na
LOC105199861	whole_body_queen	4.10720412528689	1.72327626307424	0	Queen2	north_america	1.72327626307424	-1.44534334417031	na
LOC105199861	whole_body_queen	4.10720412528689	3.2357691116451	2.11729570267697	Queen5	north_america	5.35306481432206	-0.4423289376735	na
LOC105199885	whole_body_queen	5.1152083277399	0.946658794779946	0	Queen3	north_america	0.946658794779946	-0.961000034434703	no
LOC105199885	whole_body_queen	5.1152083277399	3.44655252614848	0.904112345210441	Queen2	north_america	4.35066487135892	-1.22356862586776	no
LOC105199885	whole_body_queen	5.1152083277399	1.90756229083448	0	Queen4	north_america	1.90756229083448	-1.53981009994109	no
LOC105199885	whole_body_queen	5.1152083277399	4.89979315343406	0.979958630686813	Queen1	north_america	5.87975178412088	-1.57519408760985	no
LOC105199885	whole_body_queen	5.1152083277399	4.31435881552679	2.11729570267697	Queen5	north_america	6.43165451820376	-0.769600625518805	no
LOC105199885	whole_body_queen	5.1152083277399	8.37028851352876	1.01444279102952	Queen6	north_america	9.38473130455828	-2.2177126351178	no
LOC105199893	whole_body_queen	2.40355018858909	0	1.90944825385146	Queen4	north_america	1.90944825385146	1.5407455871871	no
LOC105199893	whole_body_queen	2.40355018858909	0.979958630686813	1.95991726137363	Queen1	north_america	2.93987589206044	0.580086561826869	no
LOC105199893	whole_body_queen	2.40355018858909	2.09257212838219	2.02888558205905	Queen6	north_america	4.12145771044124	-0.0300201632151384	no
LOC105199893	whole_body_queen	2.40355018858909	0.86163813153712	1.80822469042088	Queen2	north_america	2.669862821958	0.593085705958935	no
LOC105199893	whole_body_queen	2.40355018858909	1.0785897038817	1.05864785133848	Queen5	north_america	2.13723755522018	-0.0139079442243087	no
LOC105199893	whole_body_queen	2.40355018858909	0	0.996363919030199	Queen3	north_america	0.996363919030199	0.997374734865391	no
LOC105199901	whole_body_queen	25.5625683869932	12.5554327702931	17.2455274475019	Queen6	north_america	29.800960217795	0.428671684067148	no
LOC105199901	whole_body_queen	25.5625683869932	7.57327035823957	16.9381866235134	Queen3	north_america	24.511456981753	1.06511651052408	no
LOC105199901	whole_body_queen	25.5625683869932	15.2604983266759	15.2755860308117	Queen4	north_america	30.5360843574876	0.00133801948975975	no
LOC105199901	whole_body_queen	25.5625683869932	7.8396690454945	13.7194208296154	Queen1	north_america	21.5590898751099	0.735656644587833	no
LOC105199901	whole_body_queen	25.5625683869932	10.3396575784454	16.2740222137879	Queen2	north_america	26.6136797922334	0.607226973850613	no
LOC105199901	whole_body_queen	25.5625683869932	8.62871763105359	12.7037742160618	Queen5	north_america	21.3324918471154	0.509157711426143	no
LOC105201519	whole_body_queen	1.90043994019719	1.90756229083448	0	Queen4	north_america	1.90756229083448	-1.53981009994109	no
LOC105201519	whole_body_queen	1.90043994019719	1.04628606419109	0	Queen6	north_america	1.04628606419109	-1.03300784329498	no
LOC105201519	whole_body_queen	1.90043994019719	1.95991726137363	0	Queen1	north_america	1.95991726137363	-1.56555684873454	no
LOC105201519	whole_body_queen	1.90043994019719	1.89331758955989	0	Queen3	north_america	1.89331758955989	-1.53272469165171	no
LOC105201519	whole_body_queen	1.90043994019719	0.86163813153712	0	Queen2	north_america	0.86163813153712	-0.896572666573614	no
LOC105201519	whole_body_queen	1.90043994019719	2.1571794077634	0	Queen5	north_america	2.1571794077634	-1.65863624460286	no
LOC105201520	whole_body_queen	9.17426826387443	3.13885819257328	8.11554232823618	Queen6	north_america	11.2544005208095	1.1390956726616	no
LOC105201520	whole_body_queen	9.17426826387443	4.31435881552679	4.23459140535394	Queen5	north_america	8.54895022088073	-0.0218187095613048	no
LOC105201520	whole_body_queen	9.17426826387443	3.81512458166897	1.90944825385146	Queen4	north_america	5.72457283552043	-0.726827538198531	no
LOC105201520	whole_body_queen	9.17426826387443	3.91983452274725	5.87975178412087	Queen1	north_america	9.79958630686813	0.483746722858358	no
LOC105201520	whole_body_queen	9.17426826387443	5.67995276867968	5.9781835141812	Queen3	north_america	11.6581362828609	0.0630136364146419	no
LOC105201520	whole_body_queen	9.17426826387443	1.72327626307424	1.80822469042088	Queen2	north_america	3.53150095349512	0.0443150283622435	no
LOC105201521	whole_body_queen	9.51684610347519	0.979958630686813	2.93987589206044	Queen1	north_america	3.91983452274725	0.992679897918909	no
LOC105201521	whole_body_queen	9.51684610347519	5.16982878922272	9.04112345210441	Queen2	north_america	14.2109522413271	0.702618333682285	no
LOC105201521	whole_body_queen	9.51684610347519	8.58403030875517	11.4566895231088	Queen4	north_america	20.0407198318639	0.378216334503849	no
LOC105201521	whole_body_queen	9.51684610347519	2.1571794077634	3.17594355401545	Queen5	north_america	5.33312296177885	0.403465966612326	no
LOC105201521	whole_body_queen	9.51684610347519	4.73329397389973	8.9672752712718	Queen3	north_america	13.7005692451715	0.797834917707399	no
LOC105201521	whole_body_queen	9.51684610347519	2.09257212838219	3.04332837308857	Queen6	north_america	5.13590050147076	0.386736131045963	no
LOC105201523	whole_body_queen	7.67773191942686	4.76890572708621	2.86417238077719	Queen4	north_america	7.6330781078634	-0.578138233452669	no
LOC105201523	whole_body_queen	7.67773191942686	4.73329397389973	2.9890917570906	Queen3	north_america	7.72238573099033	-0.523303946254101	no
LOC105201523	whole_body_queen	7.67773191942686	8.62871763105359	8.46918281070788	Queen5	north_america	17.0979004417615	-0.0241037436256084	no
LOC105201523	whole_body_queen	7.67773191942686	3.91983452274725	2.93987589206044	Queen1	north_america	6.85971041480769	-0.320459606911364	no
LOC105201523	whole_body_queen	7.67773191942686	5.16982878922272	1.80822469042088	Queen2	north_america	6.9780534796436	-1.13557208307124	no
LOC105201523	whole_body_queen	7.67773191942686	3.13885819257328	7.10109953720666	Queen6	north_america	10.2399577297799	0.968884914680156	no
LOC105201526	whole_body_queen	1.92661742546676	1.04628606419109	2.02888558205905	Queen6	north_america	3.07517164625014	0.565779237210777	no
LOC105201526	whole_body_queen	1.92661742546676	0.953781145417242	2.86417238077719	Queen4	north_america	3.81795352619443	0.983890582701003	no
LOC105201526	whole_body_queen	1.92661742546676	0	1.05864785133848	Queen5	north_america	1.05864785133848	1.04169706621221	no
LOC105201526	whole_body_queen	1.92661742546676	0	1.80822469042088	Queen2	north_america	1.80822469042088	1.48965837253255	no
LOC105201526	whole_body_queen	1.92661742546676	0.979958630686813	0.979958630686813	Queen1	north_america	1.95991726137363	0	no
LOC105201526	whole_body_queen	1.92661742546676	1.89331758955989	0	Queen3	north_america	1.89331758955989	-1.53272469165171	no
LOC105201527	whole_body_queen	10.5920004037525	2.93987589206044	5.87975178412087	Queen1	north_america	8.81962767618131	0.804206329769722	no
LOC105201527	whole_body_queen	10.5920004037525	6.27771638514657	6.08665674617714	Queen6	north_america	12.3643731313237	-0.0383806585715575	no
LOC105201527	whole_body_queen	10.5920004037525	3.2357691116451	2.11729570267697	Queen5	north_america	5.35306481432206	-0.4423289376735	no
LOC105201527	whole_body_queen	10.5920004037525	1.89331758955989	0	Queen3	north_america	1.89331758955989	-1.53272469165171	no
LOC105201527	whole_body_queen	10.5920004037525	12.3991548904241	5.72834476155438	Queen4	north_america	18.1274996519785	-0.993818473553541	no
LOC105201527	whole_body_queen	10.5920004037525	4.3081906576856	8.13701110689397	Queen2	north_america	12.4452017645796	0.783502119155171	no
LOC105201528	whole_body_queen	5.00060474728106	1.0785897038817	2.11729570267697	Queen5	north_america	3.19588540655867	0.584690003221407	no
LOC105201528	whole_body_queen	5.00060474728106	3.91983452274725	1.95991726137363	Queen1	north_america	5.87975178412088	-0.733052943003404	no
LOC105201528	whole_body_queen	5.00060474728106	2.09257212838219	2.02888558205905	Queen6	north_america	4.12145771044124	-0.0300201632151384	no
LOC105201528	whole_body_queen	5.00060474728106	3.78663517911978	5.9781835141812	Queen3	north_america	9.76481869330098	0.543839685429763	no
LOC105201528	whole_body_queen	5.00060474728106	1.90756229083448	0.95472412692573	Queen4	north_america	2.86228641776021	-0.57284508770261	no
LOC105201528	whole_body_queen	5.00060474728106	4.3081906576856	1.80822469042088	Queen2	north_america	6.11641534810648	-0.918561817308506	no
LOC105201529	whole_body_queen	4.00375156903076	0.953781145417242	1.90944825385146	Queen4	north_america	2.8632293992687	0.574476715635429	no
LOC105201529	whole_body_queen	4.00375156903076	2.93987589206044	1.95991726137363	Queen1	north_america	4.89979315343406	-0.41259333609204	no
LOC105201529	whole_body_queen	4.00375156903076	2.09257212838219	2.02888558205905	Queen6	north_america	4.12145771044124	-0.0300201632151384	no
LOC105201529	whole_body_queen	4.00375156903076	1.89331758955989	1.9927278380604	Queen3	north_america	3.88604542762029	0.0487363928863094	no
LOC105201529	whole_body_queen	4.00375156903076	0.86163813153712	0.904112345210441	Queen2	north_america	1.76575047674756	0.0325459355472472	no
LOC105201529	whole_body_queen	4.00375156903076	2.1571794077634	2.11729570267697	Queen5	north_america	4.27447511044037	-0.0183412309449293	no
LOC105201533	whole_body_queen	66.4446807790029	24.9875058145765	25.3151456658923	Queen2	north_america	50.3026514804688	0.0180752049240692	no
LOC105201533	whole_body_queen	66.4446807790029	56.8376005798351	22.5390485057967	Queen1	north_america	79.3766490856318	-1.2969516976351	no
LOC105201533	whole_body_queen	66.4446807790029	26.7058720716828	25.7775514269947	Queen4	north_america	52.4834234986775	-0.0491677332683359	no
LOC105201533	whole_body_queen	66.4446807790029	52.3143032095547	24.3466269847086	Queen6	north_america	76.6609301942633	-1.07272885982	no
LOC105201533	whole_body_queen	66.4446807790029	26.5064462538385	33.8763732470268	Queen3	north_america	60.3828195008653	0.342480263715279	no
LOC105201533	whole_body_queen	66.4446807790029	28.0433323009242	44.4632097562164	Queen5	north_america	72.5065420571405	0.64649255257164	no
LOC105201534	whole_body_queen	9.76555258213112	4.31435881552679	4.23459140535394	Queen5	north_america	8.54895022088073	-0.0218187095613048	no
LOC105201534	whole_body_queen	9.76555258213112	1.04628606419109	2.02888558205905	Queen6	north_america	3.07517164625014	0.565779237210777	no
LOC105201534	whole_body_queen	9.76555258213112	11.2012957099826	9.04112345210441	Queen2	north_america	20.242419162087	-0.281113667742507	no
LOC105201534	whole_body_queen	9.76555258213112	5.72268687250345	5.72834476155438	Queen4	north_america	11.4510316340578	0.00121367775783272	no
LOC105201534	whole_body_queen	9.76555258213112	4.73329397389973	5.9781835141812	Queen3	north_america	10.7114774880809	0.283487283487585	no
LOC105201534	whole_body_queen	9.76555258213112	4.89979315343406	3.91983452274725	Queen1	north_america	8.81962767618131	-0.262054582779575	no
LOC105201535	whole_body_queen	0.966869888052027	0	1.05864785133848	Queen5	north_america	1.05864785133848	1.04169706621221	no
LOC105201535	whole_body_queen	0.966869888052027	0	1.01444279102952	Queen6	north_america	1.01444279102952	1.01038083439196	no
LOC105201535	whole_body_queen	0.966869888052027	0.86163813153712	0	Queen2	north_america	0.86163813153712	-0.896572666573614	no
LOC105201535	whole_body_queen	0.966869888052027	0.946658794779946	0	Queen3	north_america	0.946658794779946	-0.961000034434703	no
LOC105201535	whole_body_queen	0.966869888052027	0.953781145417242	0	Queen4	north_america	0.953781145417242	-0.966268871551673	no
LOC105201535	whole_body_queen	0.966869888052027	0.979958630686813	0	Queen1	north_america	0.979958630686813	-0.985470286907669	no
LOC105201536	whole_body_queen	1.93447677282075	0	1.80822469042088	Queen2	north_america	1.80822469042088	1.48965837253255	no
LOC105201536	whole_body_queen	1.93447677282075	1.04628606419109	1.01444279102952	Queen6	north_america	2.06072885522062	-0.0226270089030178	no
LOC105201536	whole_body_queen	1.93447677282075	0.946658794779946	1.9927278380604	Queen3	north_america	2.93938663284035	0.620461050103316	no
LOC105201536	whole_body_queen	1.93447677282075	0	1.05864785133848	Queen5	north_america	1.05864785133848	1.04169706621221	no
LOC105201536	whole_body_queen	1.93447677282075	0.953781145417242	5.72834476155438	Queen4	north_america	6.68212590697162	1.7839827598799	no
LOC105201536	whole_body_queen	1.93447677282075	0	0.979958630686813	Queen1	north_america	0.979958630686813	0.985470286907668	no
LOC105201541	whole_body_queen	2.83436925435765	1.0785897038817	1.05864785133848	Queen5	north_america	2.13723755522018	-0.0139079442243087	no
LOC105201541	whole_body_queen	2.83436925435765	0.979958630686813	0.979958630686813	Queen1	north_america	1.95991726137363	0	no
LOC105201541	whole_body_queen	2.83436925435765	1.90756229083448	1.90944825385146	Queen4	north_america	3.81701054468594	0.000935487246009695	no
LOC105201541	whole_body_queen	2.83436925435765	1.04628606419109	1.01444279102952	Queen6	north_america	2.06072885522062	-0.0226270089030178	no
LOC105201541	whole_body_queen	2.83436925435765	3.78663517911978	3.9854556761208	Queen3	north_america	7.77209085524058	0.0587135215696023	no
LOC105201541	whole_body_queen	2.83436925435765	1.72327626307424	1.80822469042088	Queen2	north_america	3.53150095349512	0.0443150283622435	no
LOC105202812	whole_body_queen	17.1562698855436	0	7.23289876168353	Queen2	north_america	7.23289876168353	3.04140048566313	na
LOC105202812	whole_body_queen	17.1562698855436	0	7.63779301540584	Queen4	north_america	7.63779301540584	3.11066274613219	na
LOC105202812	whole_body_queen	17.1562698855436	0	24.3489005807851	Queen5	north_america	24.3489005807851	4.66385127166056	na
LOC105202812	whole_body_queen	17.1562698855436	0	24.4989657671703	Queen1	north_america	24.4989657671703	4.67236682774274	na
LOC105202812	whole_body_queen	17.1562698855436	0	9.963639190302	Queen3	north_america	9.963639190302	3.45465485033376	na
LOC105202812	whole_body_queen	17.1562698855436	1.04628606419109	44.635482805299	Queen6	north_america	45.6817688694901	4.47907624617866	na
LOC105202813	whole_body_queen	15.0713948683782	9.41657457771985	4.05777116411809	Queen6	north_america	13.4743457418379	-1.04230726509388	no
LOC105202813	whole_body_queen	15.0713948683782	9.46658794779946	9.963639190302	Queen3	north_america	19.4302271381015	0.0669355474722861	no
LOC105202813	whole_body_queen	15.0713948683782	13.3529360358414	9.5472412692573	Queen4	north_america	22.9001773050987	-0.444480186975265	no
LOC105202813	whole_body_queen	15.0713948683782	5.39294851940849	6.35188710803091	Queen5	north_america	11.7448356274394	0.201633137203501	no
LOC105202813	whole_body_queen	15.0713948683782	3.91983452274725	3.91983452274725	Queen1	north_america	7.8396690454945	0	no
LOC105202813	whole_body_queen	15.0713948683782	10.3396575784454	6.32878641647309	Queen2	north_america	16.6684439949185	-0.629730850689676	no
LOC105202814	whole_body_queen	6.00668145286675	4.18514425676438	3.04332837308857	Queen6	north_america	7.22847262985295	-0.358840752289675	no
LOC105202814	whole_body_queen	6.00668145286675	2.86134343625172	3.81889650770292	Queen4	north_america	6.68023994395465	0.319599941180887	no
LOC105202814	whole_body_queen	6.00668145286675	3.91983452274725	3.91983452274725	Queen1	north_america	7.8396690454945	0	no
LOC105202814	whole_body_queen	6.00668145286675	2.58491439461136	2.71233703563132	Queen2	north_america	5.29725143024268	0.0503890270662438	no
LOC105202814	whole_body_queen	6.00668145286675	2.1571794077634	3.17594355401545	Queen5	north_america	5.33312296177885	0.403465966612326	no
LOC105202814	whole_body_queen	6.00668145286675	2.83997638433984	1.9927278380604	Queen3	north_america	4.83270422240024	-0.359636353934307	no
LOC105202816	whole_body_queen	3.24031088080948	0	3.61644938084176	Queen2	north_america	3.61644938084176	2.20678366764805	na
LOC105202816	whole_body_queen	3.24031088080948	0	4.89979315343406	Queen1	north_america	4.89979315343406	2.56066437451752	na
LOC105202816	whole_body_queen	3.24031088080948	0	2.86417238077719	Queen4	north_america	2.86417238077719	1.95015945425268	na
LOC105202816	whole_body_queen	3.24031088080948	0	8.9672752712718	Queen3	north_america	8.9672752712718	3.3171991726403	na
LOC105202816	whole_body_queen	3.24031088080948	0	2.02888558205905	Queen6	north_america	2.02888558205905	1.59878708050576	na
LOC105202816	whole_body_queen	3.24031088080948	0	2.11729570267697	Queen5	north_america	2.11729570267697	1.64029501365793	na
LOC105202817	whole_body_queen	1.48718002620157	0	1.95991726137363	Queen1	north_america	1.95991726137363	1.56555684873454	no
LOC105202817	whole_body_queen	1.48718002620157	0	0.95472412692573	Queen4	north_america	0.95472412692573	0.966965012238482	no
LOC105202817	whole_body_queen	1.48718002620157	0	0.996363919030199	Queen3	north_america	0.996363919030199	0.997374734865391	no
LOC105202817	whole_body_queen	1.48718002620157	0	1.01444279102952	Queen6	north_america	1.01444279102952	1.01038083439196	no
LOC105202817	whole_body_queen	1.48718002620157	0	2.11729570267697	Queen5	north_america	2.11729570267697	1.64029501365793	no
LOC105202817	whole_body_queen	1.48718002620157	0.86163813153712	2.71233703563132	Queen2	north_america	3.57397516716844	0.99575502922616	no
LOC105202818	whole_body_queen	25.1236515497926	2.83997638433984	2.9890917570906	Queen3	north_america	5.82906814143044	0.0549628702064705	no
LOC105202818	whole_body_queen	25.1236515497926	19.0756229083448	22.9133790462175	Queen4	north_america	41.9890019545624	0.252373249920326	no
LOC105202818	whole_body_queen	25.1236515497926	12.5554327702931	14.2021990744133	Queen6	north_america	26.7576318447065	0.16540885850027	no
LOC105202818	whole_body_queen	25.1236515497926	10.785897038817	12.7037742160618	Queen5	north_america	23.4896712548788	0.217511718804577	no
LOC105202818	whole_body_queen	25.1236515497926	6.85971041480769	8.81962767618131	Queen1	north_america	15.679338090989	0.32119216550224	no
LOC105202818	whole_body_queen	25.1236515497926	18.0944007622795	14.4657975233671	Queen2	north_america	32.5601982856466	-0.304068414044122	no
LOC105202820	whole_body_queen	5.70965967071348	0.946658794779946	1.9927278380604	Queen3	north_america	2.93938663284035	0.620461050103316	no
LOC105202820	whole_body_queen	5.70965967071348	0.953781145417242	2.86417238077719	Queen4	north_america	3.81795352619443	0.983890582701003	no
LOC105202820	whole_body_queen	5.70965967071348	1.0785897038817	3.17594355401545	Queen5	north_america	4.25453325789715	1.00649720077866	no
LOC105202820	whole_body_queen	5.70965967071348	0.979958630686813	8.81962767618131	Queen1	north_america	9.79958630686813	2.31019803703046	no
LOC105202820	whole_body_queen	5.70965967071348	2.09257212838219	5.07221395514762	Queen6	north_america	7.1647860835298	0.973415381451508	no
LOC105202820	whole_body_queen	5.70965967071348	2.58491439461136	5.42467407126264	Queen2	north_america	8.009588465874	0.841684598382312	no
LOC105202821	whole_body_queen	1.40093298347797	0.979958630686813	0	Queen1	north_america	0.979958630686813	-0.985470286907669	no
LOC105202821	whole_body_queen	1.40093298347797	1.89331758955989	0	Queen3	north_america	1.89331758955989	-1.53272469165171	no
LOC105202821	whole_body_queen	1.40093298347797	1.04628606419109	0	Queen6	north_america	1.04628606419109	-1.03300784329498	no
LOC105202821	whole_body_queen	1.40093298347797	1.90756229083448	0	Queen4	north_america	1.90756229083448	-1.53981009994109	no
LOC105202821	whole_body_queen	1.40093298347797	1.72327626307424	0	Queen2	north_america	1.72327626307424	-1.44534334417031	no
LOC105202821	whole_body_queen	1.40093298347797	1.0785897038817	0	Queen5	north_america	1.0785897038817	-1.05560501043652	no
LOC105202822	whole_body_queen	1.95146998759189	0.946658794779946	0.996363919030199	Queen3	north_america	1.94302271381015	0.0363747004306876	no
LOC105202822	whole_body_queen	1.95146998759189	0.953781145417242	0.95472412692573	Queen4	north_america	1.90850527234297	0.00069614068680925	no
LOC105202822	whole_body_queen	1.95146998759189	1.04628606419109	2.02888558205905	Queen6	north_america	3.07517164625014	0.565779237210777	no
LOC105202822	whole_body_queen	1.95146998759189	1.72327626307424	0.904112345210441	Queen2	north_america	2.62738860828468	-0.516224742049444	no
LOC105202822	whole_body_queen	1.95146998759189	0.979958630686813	0.979958630686813	Queen1	north_america	1.95991726137363	0	no
LOC105202822	whole_body_queen	1.95146998759189	0	1.05864785133848	Queen5	north_america	1.05864785133848	1.04169706621221	no
LOC105202823	whole_body_queen	3.02005796739632	0.86163813153712	4.5205617260522	Queen2	north_america	5.38219985758932	1.56824240444409	na
LOC105202823	whole_body_queen	3.02005796739632	0	25.3610697757381	Queen6	north_america	25.3610697757381	4.72033701336822	na
LOC105202823	whole_body_queen	3.02005796739632	0	1.95991726137363	Queen1	north_america	1.95991726137363	1.56555684873454	na
LOC105202823	whole_body_queen	3.02005796739632	0	2.86417238077719	Queen4	north_america	2.86417238077719	1.95015945425268	na
LOC105202823	whole_body_queen	3.02005796739632	0	3.17594355401545	Queen5	north_america	3.17594355401545	2.06210221121518	na
LOC105202823	whole_body_queen	3.02005796739632	0	1.9927278380604	Queen3	north_america	1.9927278380604	1.58146108453802	na
LOC105202826	whole_body_queen	5.64207956136941	4.3081906576856	1.80822469042088	Queen2	north_america	6.11641534810648	-0.918561817308506	no
LOC105202826	whole_body_queen	5.64207956136941	2.83997638433984	1.9927278380604	Queen3	north_america	4.83270422240024	-0.359636353934307	no
LOC105202826	whole_body_queen	5.64207956136941	2.86134343625172	1.90944825385146	Queen4	north_america	4.77079169010319	-0.408357289222251	no
LOC105202826	whole_body_queen	5.64207956136941	3.13885819257328	2.02888558205905	Queen6	north_america	5.16774377463233	-0.450445738640836	no
LOC105202826	whole_body_queen	5.64207956136941	6.47153822329019	2.11729570267697	Queen5	north_america	8.58883392596716	-1.26111027870816	no
LOC105202826	whole_body_queen	5.64207956136941	5.87975178412087	2.93987589206044	Queen1	north_america	8.81962767618131	-0.804206329769722	no
LOC105202831	whole_body_queen	0.997200710858168	0.979958630686813	0	Queen1	north_america	0.979958630686813	-0.985470286907669	no
LOC105202831	whole_body_queen	0.997200710858168	0.86163813153712	0	Queen2	north_america	0.86163813153712	-0.896572666573614	no
LOC105202831	whole_body_queen	0.997200710858168	1.90756229083448	1.90944825385146	Queen4	north_america	3.81701054468594	0.000935487246009695	no
LOC105202831	whole_body_queen	0.997200710858168	0	1.01444279102952	Queen6	north_america	1.01444279102952	1.01038083439196	no
LOC105202831	whole_body_queen	0.997200710858168	0.946658794779946	0	Queen3	north_america	0.946658794779946	-0.961000034434703	no
LOC105202831	whole_body_queen	0.997200710858168	0	1.05864785133848	Queen5	north_america	1.05864785133848	1.04169706621221	no
LOC105202832	whole_body_queen	0.966869888052027	0	0.979958630686813	Queen1	north_america	0.979958630686813	0.985470286907668	no
LOC105202832	whole_body_queen	0.966869888052027	0	1.05864785133848	Queen5	north_america	1.05864785133848	1.04169706621221	no
LOC105202832	whole_body_queen	0.966869888052027	0.953781145417242	0	Queen4	north_america	0.953781145417242	-0.966268871551673	no
LOC105202832	whole_body_queen	0.966869888052027	0.86163813153712	0	Queen2	north_america	0.86163813153712	-0.896572666573614	no
LOC105202832	whole_body_queen	0.966869888052027	1.04628606419109	0	Queen6	north_america	1.04628606419109	-1.03300784329498	no
LOC105202832	whole_body_queen	0.966869888052027	0	0	Queen3	north_america	0	0	no
LOC105202834	whole_body_queen	5.23249760243751	2.58491439461136	2.71233703563132	Queen2	north_america	5.29725143024268	0.0503890270662438	no
LOC105202834	whole_body_queen	5.23249760243751	0.979958630686813	0.979958630686813	Queen1	north_america	1.95991726137363	0	no
LOC105202834	whole_body_queen	5.23249760243751	3.81512458166897	4.77362063462865	Queen4	north_america	8.58874521629762	0.261903190619083	no
LOC105202834	whole_body_queen	5.23249760243751	3.13885819257328	2.02888558205905	Queen6	north_america	5.16774377463233	-0.450445738640836	no
LOC105202834	whole_body_queen	5.23249760243751	3.78663517911978	0.996363919030199	Queen3	north_america	4.78299909814998	-1.26163711812533	no
LOC105202834	whole_body_queen	5.23249760243751	3.2357691116451	2.11729570267697	Queen5	north_america	5.35306481432206	-0.4423289376735	no
LOC105203016	whole_body_queen	8.04129223318849	4.18514425676438	4.05777116411809	Queen6	north_america	8.24291542088247	-0.0358823624674825	no
LOC105203016	whole_body_queen	8.04129223318849	4.3081906576856	5.42467407126264	Queen2	north_america	9.73286472894824	0.275403077274788	no
LOC105203016	whole_body_queen	8.04129223318849	1.89331758955989	6.9745474332114	Queen3	north_america	8.86786502277129	1.46267795457524	no
LOC105203016	whole_body_queen	8.04129223318849	1.90756229083448	0.95472412692573	Queen4	north_america	2.86228641776021	-0.57284508770261	no
LOC105203016	whole_body_queen	8.04129223318849	3.91983452274725	3.91983452274725	Queen1	north_america	7.8396690454945	0	no
LOC105203016	whole_body_queen	8.04129223318849	2.1571794077634	4.23459140535394	Queen5	north_america	6.39177081311733	0.729440685012571	no
LOC105203017	whole_body_queen	3.29484867235263	2.1571794077634	2.11729570267697	Queen5	north_america	4.27447511044037	-0.0183412309449293	no
LOC105203017	whole_body_queen	3.29484867235263	0.953781145417242	0.95472412692573	Queen4	north_america	1.90850527234297	0.00069614068680925	no
LOC105203017	whole_body_queen	3.29484867235263	1.95991726137363	1.95991726137363	Queen1	north_america	3.91983452274725	0	no
LOC105203017	whole_body_queen	3.29484867235263	0.86163813153712	1.80822469042088	Queen2	north_america	2.669862821958	0.593085705958935	no
LOC105203017	whole_body_queen	3.29484867235263	0.946658794779946	0	Queen3	north_america	0.946658794779946	-0.961000034434703	no
LOC105203017	whole_body_queen	3.29484867235263	3.13885819257328	2.02888558205905	Queen6	north_america	5.16774377463233	-0.450445738640836	no
LOC105203018	whole_body_queen	11.0658239679399	9.41657457771985	2.02888558205905	Queen6	north_america	11.4454601597789	-1.78202194917717	no
LOC105203018	whole_body_queen	11.0658239679399	5.72268687250345	4.77362063462865	Queen4	north_america	10.4963075071321	-0.219561637669022	no
LOC105203018	whole_body_queen	11.0658239679399	5.39294851940849	5.29323925669242	Queen5	north_america	10.6861877761009	-0.0226786838701915	no
LOC105203018	whole_body_queen	11.0658239679399	7.57327035823957	2.9890917570906	Queen3	north_america	10.5623621153302	-1.10378533085282	no
LOC105203018	whole_body_queen	11.0658239679399	6.89310505229696	6.32878641647309	Queen2	north_america	13.22189146877	-0.107018630383664	no
LOC105203018	whole_body_queen	11.0658239679399	7.8396690454945	6.85971041480769	Queen1	north_america	14.6993794603022	-0.169516198130837	no
LOC105203019	whole_body_queen	49.3998275999709	25.4789243978571	28.4188002899176	Queen1	north_america	53.8977246877747	0.151893894604692	no
LOC105203019	whole_body_queen	49.3998275999709	17.039858306039	18.9309144615738	Queen3	north_america	35.9707727676128	0.143819897805663	no
LOC105203019	whole_body_queen	49.3998275999709	28.434058340725	38.876830844049	Queen2	north_america	67.3108891847739	0.438064284649944	no
LOC105203019	whole_body_queen	49.3998275999709	14.6480048986753	16.2310846564724	Queen6	north_america	30.8790895551477	0.139034791654592	no
LOC105203019	whole_body_queen	49.3998275999709	36.2436835258552	36.2795168231778	Queen4	north_america	72.5232003490329	0.00138739410245284	no
LOC105203019	whole_body_queen	49.3998275999709	23.7289734853974	21.1729570267697	Queen5	north_america	44.9019305121671	-0.157401170301104	no
LOC105203020	whole_body_queen	18.0769858880933	11.3599055373594	10.9600031093322	Queen3	north_america	22.3199086466916	-0.0474499526424444	no
LOC105203020	whole_body_queen	18.0769858880933	8.37028851352876	10.1444279102952	Queen6	north_america	18.514716423824	0.250157184356242	no
LOC105203020	whole_body_queen	18.0769858880933	9.79958630686813	7.8396690454945	Queen1	north_america	17.6392553523626	-0.28891178733337	no
LOC105203020	whole_body_queen	18.0769858880933	8.62871763105359	7.41053495936939	Queen5	north_america	16.039252590423	-0.195146103021715	no
LOC105203020	whole_body_queen	18.0769858880933	7.63024916333793	7.63779301540584	Queen4	north_america	15.2680421787438	0.00126053417605818	no
LOC105203020	whole_body_queen	18.0769858880933	12.0629338415197	9.04112345210441	Queen2	north_america	21.1040572936241	-0.379558257865829	no
LOC105203021	whole_body_queen	6.7437976941116	1.04628606419109	3.04332837308857	Queen6	north_america	4.08961443727966	0.982535531471878	no
LOC105203021	whole_body_queen	6.7437976941116	2.93987589206044	1.95991726137363	Queen1	north_america	4.89979315343406	-0.41259333609204	no
LOC105203021	whole_body_queen	6.7437976941116	4.76890572708621	3.81889650770292	Queen4	north_america	8.58780223478913	-0.259594870115107	no
LOC105203021	whole_body_queen	6.7437976941116	6.47153822329019	4.23459140535394	Queen5	north_america	10.7061296286441	-0.513328362750658	no
LOC105203021	whole_body_queen	6.7437976941116	0.946658794779946	1.9927278380604	Queen3	north_america	2.93938663284035	0.620461050103316	no
LOC105203021	whole_body_queen	6.7437976941116	11.2012957099826	9.04112345210441	Queen2	north_america	20.242419162087	-0.281113667742507	no
LOC105203023	whole_body_queen	8.55384038180223	4.73329397389973	1.9927278380604	Queen3	north_america	6.72602181196013	-0.937903170394877	no
LOC105203023	whole_body_queen	8.55384038180223	5.87975178412087	6.85971041480769	Queen1	north_america	12.7394621989286	0.192119643839589	no
LOC105203023	whole_body_queen	8.55384038180223	3.81512458166897	2.86417238077719	Queen4	north_america	6.67929696244616	-0.317413671132956	no
LOC105203023	whole_body_queen	8.55384038180223	6.47153822329019	4.23459140535394	Queen5	north_america	10.7061296286441	-0.513328362750658	no
LOC105203023	whole_body_queen	8.55384038180223	5.16982878922272	2.71233703563132	Queen2	north_america	7.88216582485404	-0.732902759804019	no
LOC105203023	whole_body_queen	8.55384038180223	3.13885819257328	6.08665674617714	Queen6	north_america	9.22551493875042	0.775872352285938	no
LOC105203024	whole_body_queen	1.92576399307656	0	0.904112345210441	Queen2	north_america	0.904112345210441	0.929118602120862	no
LOC105203024	whole_body_queen	1.92576399307656	1.04628606419109	1.01444279102952	Queen6	north_america	2.06072885522062	-0.0226270089030178	no
LOC105203024	whole_body_queen	1.92576399307656	1.0785897038817	0	Queen5	north_america	1.0785897038817	-1.05560501043652	no
LOC105203024	whole_body_queen	1.92576399307656	0.946658794779946	0.996363919030199	Queen3	north_america	1.94302271381015	0.0363747004306876	no
LOC105203024	whole_body_queen	1.92576399307656	0.953781145417242	0.95472412692573	Queen4	north_america	1.90850527234297	0.00069614068680925	no
LOC105203024	whole_body_queen	1.92576399307656	0.979958630686813	0.979958630686813	Queen1	north_america	1.95991726137363	0	no
LOC105203026	whole_body_queen	1.95146998759189	0.953781145417242	0.95472412692573	Queen4	north_america	1.90850527234297	0.00069614068680925	no
LOC105203026	whole_body_queen	1.95146998759189	1.0785897038817	1.05864785133848	Queen5	north_america	2.13723755522018	-0.0139079442243087	no
LOC105203026	whole_body_queen	1.95146998759189	0.979958630686813	0.979958630686813	Queen1	north_america	1.95991726137363	0	no
LOC105203026	whole_body_queen	1.95146998759189	1.72327626307424	0.904112345210441	Queen2	north_america	2.62738860828468	-0.516224742049444	no
LOC105203026	whole_body_queen	1.95146998759189	0.946658794779946	0.996363919030199	Queen3	north_america	1.94302271381015	0.0363747004306876	no
LOC105203026	whole_body_queen	1.95146998759189	0	0	Queen6	north_america	0	0	no
LOC105203027	whole_body_queen	34.1220985024039	16.1788455582255	10.5864785133848	Queen5	north_america	26.7653240716103	-0.568190935026221	no
LOC105203027	whole_body_queen	34.1220985024039	17.986517100819	13.9490948664228	Queen3	north_america	31.9356119672418	-0.344917145655667	no
LOC105203027	whole_body_queen	34.1220985024039	16.7405770270575	16.2310846564724	Queen6	north_america	32.9716616835299	-0.0420394165617159	no
LOC105203027	whole_body_queen	34.1220985024039	21.5590898751099	13.7194208296154	Queen1	north_america	35.2785107047252	-0.615987958492926	no
LOC105203027	whole_body_queen	34.1220985024039	18.0944007622795	17.1781345589984	Queen2	north_america	35.2725353212779	-0.0709454870161216	no
LOC105203027	whole_body_queen	34.1220985024039	20.0294040537621	18.1397584115889	Queen4	north_america	38.169162465351	-0.135835346767709	no
LOC105203028	whole_body_queen	1.85789349062768	0	1.80822469042088	Queen2	north_america	1.80822469042088	1.48965837253255	no
LOC105203028	whole_body_queen	1.85789349062768	2.09257212838219	2.02888558205905	Queen6	north_america	4.12145771044124	-0.0300201632151384	no
LOC105203028	whole_body_queen	1.85789349062768	0	0	Queen3	north_america	0	0	no
LOC105203028	whole_body_queen	1.85789349062768	1.95991726137363	0	Queen1	north_america	1.95991726137363	-1.56555684873454	no
LOC105203028	whole_body_queen	1.85789349062768	1.90756229083448	0	Queen4	north_america	1.90756229083448	-1.53981009994109	no
LOC105203028	whole_body_queen	1.85789349062768	0	1.05864785133848	Queen5	north_america	1.05864785133848	1.04169706621221	no
LOC105203029	whole_body_queen	1.9342112668583	1.95991726137363	0	Queen1	north_america	1.95991726137363	-1.56555684873454	no
LOC105203029	whole_body_queen	1.9342112668583	0.86163813153712	0	Queen2	north_america	0.86163813153712	-0.896572666573614	no
LOC105203029	whole_body_queen	1.9342112668583	2.09257212838219	2.02888558205905	Queen6	north_america	4.12145771044124	-0.0300201632151384	no
LOC105203029	whole_body_queen	1.9342112668583	1.89331758955989	0	Queen3	north_america	1.89331758955989	-1.53272469165171	no
LOC105203029	whole_body_queen	1.9342112668583	0.953781145417242	0.95472412692573	Queen4	north_america	1.90850527234297	0.00069614068680925	no
LOC105203029	whole_body_queen	1.9342112668583	3.2357691116451	0	Queen5	north_america	3.2357691116451	-2.08262395133143	no
LOC105203030	whole_body_queen	12.0589360522452	6.89310505229696	4.5205617260522	Queen2	north_america	11.4136667783492	-0.515777879704689	no
LOC105203030	whole_body_queen	12.0589360522452	4.31435881552679	2.11729570267697	Queen5	north_america	6.43165451820376	-0.769600625518805	no
LOC105203030	whole_body_queen	12.0589360522452	16.7405770270575	4.05777116411809	Queen6	north_america	20.7983481911756	-1.81047926555937	no
LOC105203030	whole_body_queen	12.0589360522452	4.73329397389973	7.9709113522416	Queen3	north_america	12.7042053261413	0.645890300620999	no
LOC105203030	whole_body_queen	12.0589360522452	3.81512458166897	0.95472412692573	Queen4	north_america	4.7698487085947	-1.30060811314715	no
LOC105203030	whole_body_queen	12.0589360522452	9.79958630686813	4.89979315343406	Queen1	north_america	14.6993794603022	-0.872239769382579	no
LOC105203031	whole_body_queen	29.0713534634461	11.4453737450069	14.320861903886	Queen4	north_america	25.7662356488929	0.299887904756306	no
LOC105203031	whole_body_queen	29.0713534634461	13.7862101045939	12.6575728329462	Queen2	north_america	26.4437829375401	-0.114551201921346	no
LOC105203031	whole_body_queen	29.0713534634461	20.9257212838219	15.2166418654428	Queen6	north_america	36.1423631492647	-0.435149205478758	no
LOC105203031	whole_body_queen	29.0713534634461	18.3360249659889	12.7037742160618	Queen5	north_america	31.0397991820507	-0.496717954145421	no
LOC105203031	whole_body_queen	29.0713534634461	15.679338090989	17.6392553523626	Queen1	north_america	33.3185934433516	0.160282187274194	no
LOC105203031	whole_body_queen	29.0713534634461	15.1465407164791	11.9563670283624	Queen3	north_america	27.1029077448415	-0.317563868159062	no
LOC105203032	whole_body_queen	31.191850916489	18.8331491554397	21.30329861162	Queen6	north_america	40.1364477670597	0.169343327164335	no
LOC105203032	whole_body_queen	31.191850916489	17.986517100819	11.9563670283624	Queen3	north_america	29.9428841291814	-0.551314038297263	no
LOC105203032	whole_body_queen	31.191850916489	19.8176770253538	14.4657975233671	Queen2	north_america	34.2834745487208	-0.428727861456724	no
LOC105203032	whole_body_queen	31.191850916489	17.2574352621072	8.46918281070788	Queen5	north_america	25.7266180728151	-0.947172283243186	no
LOC105203032	whole_body_queen	31.191850916489	9.79958630686813	9.79958630686813	Queen1	north_america	19.5991726137363	0	no
LOC105203032	whole_body_queen	31.191850916489	20.0294040537621	12.4114136500345	Queen4	north_america	32.4408177037966	-0.648946651851389	no
LOC105203033	whole_body_queen	18.382712665022	8.37028851352876	12.1733134923543	Queen6	north_america	20.543602005883	0.491452898666306	no
LOC105203033	whole_body_queen	18.382712665022	8.58403030875517	7.63779301540584	Queen4	north_america	16.221823324161	-0.149969724413297	no
LOC105203033	whole_body_queen	18.382712665022	29.3987589206044	28.4188002899176	Queen1	north_america	57.8175592105219	-0.0472740103410174	no
LOC105203033	whole_body_queen	18.382712665022	6.89310505229696	9.04112345210441	Queen2	north_america	15.9342285044014	0.347255838563682	no
LOC105203033	whole_body_queen	18.382712665022	10.785897038817	19.0556613240927	Queen5	north_america	29.8415583629097	0.766947970966097	no
LOC105203033	whole_body_queen	18.382712665022	1.89331758955989	1.9927278380604	Queen3	north_america	3.88604542762029	0.0487363928863094	no
LOC105203034	whole_body_queen	106.763779603755	50.1729161233371	49.81819595151	Queen3	north_america	99.9911120748471	-0.0100352880916007	no
LOC105203034	whole_body_queen	106.763779603755	37.6662983108794	48.6932539694171	Queen6	north_america	86.3595522802965	0.361973358551604	no
LOC105203034	whole_body_queen	106.763779603755	66.8725616406653	65.636166782986	Queen5	north_america	132.508728423651	-0.0265230515555688	no
LOC105203034	whole_body_queen	106.763779603755	39.6353540507075	65.0960888551517	Queen2	north_america	104.731442905859	0.70182944043497	no
LOC105203034	whole_body_queen	106.763779603755	42.9201515437759	65.8759647578754	Queen4	north_america	108.796116301651	0.606604766700258	no
LOC105203034	whole_body_queen	106.763779603755	43.1181797502198	70.5570214094505	Queen1	north_america	113.67520115967	0.697720067134749	no
LOC105203035	whole_body_queen	2.38231308175243	3.13885819257328	3.04332837308857	Queen6	north_america	6.18218656566185	-0.0336894443797355	no
LOC105203035	whole_body_queen	2.38231308175243	0.953781145417242	0.95472412692573	Queen4	north_america	1.90850527234297	0.00069614068680925	no
LOC105203035	whole_body_queen	2.38231308175243	0.946658794779946	0.996363919030199	Queen3	north_america	1.94302271381015	0.0363747004306876	no
LOC105203035	whole_body_queen	2.38231308175243	1.95991726137363	3.91983452274725	Queen1	north_america	5.87975178412088	0.733052943003404	no
LOC105203035	whole_body_queen	2.38231308175243	1.72327626307424	0.904112345210441	Queen2	north_america	2.62738860828468	-0.516224742049444	no
LOC105203035	whole_body_queen	2.38231308175243	1.0785897038817	1.05864785133848	Queen5	north_america	2.13723755522018	-0.0139079442243087	no
LOC105203036	whole_body_queen	24.8988964832927	11.2012957099826	7.23289876168353	Queen2	north_america	18.4341944716661	-0.567561971365456	no
LOC105203036	whole_body_queen	24.8988964832927	11.4453737450069	14.320861903886	Queen4	north_america	25.7662356488929	0.299887904756306	no
LOC105203036	whole_body_queen	24.8988964832927	14.6480048986753	8.11554232823618	Queen6	north_america	22.7635472269115	-0.77957833012392	no
LOC105203036	whole_body_queen	24.8988964832927	11.7595035682417	13.7194208296154	Queen1	north_america	25.4789243978571	0.206148706754392	no
LOC105203036	whole_body_queen	24.8988964832927	12.9430764465804	11.6451263647233	Queen5	north_america	24.5882028113037	-0.140967463192527	no
LOC105203036	whole_body_queen	24.8988964832927	13.2532231269192	11.9563670283624	Queen3	north_america	25.2095901552816	-0.137626954878467	no
LOC105203037	whole_body_queen	3.6071755012504	2.1571794077634	2.11729570267697	Queen5	north_america	4.27447511044037	-0.0183412309449293	no
LOC105203037	whole_body_queen	3.6071755012504	15.1465407164791	23.9127340567248	Queen3	north_america	39.0592747732039	0.625658248646871	no
LOC105203037	whole_body_queen	3.6071755012504	1.95991726137363	0.979958630686813	Queen1	north_america	2.93987589206044	-0.58008656182687	no
LOC105203037	whole_body_queen	3.6071755012504	25.7520909262655	25.7775514269947	Queen4	north_america	51.5296423532602	0.00137238880349961	no
LOC105203037	whole_body_queen	3.6071755012504	1.72327626307424	0.904112345210441	Queen2	north_america	2.62738860828468	-0.516224742049444	no
LOC105203037	whole_body_queen	3.6071755012504	1.04628606419109	1.01444279102952	Queen6	north_america	2.06072885522062	-0.0226270089030178	no
LOC105203038	whole_body_queen	18.822505475232	5.39294851940849	6.35188710803091	Queen5	north_america	11.7448356274394	0.201633137203501	no
LOC105203038	whole_body_queen	18.822505475232	15.1465407164791	15.9418227044832	Queen3	north_america	31.0883634209623	0.0693639862474121	no
LOC105203038	whole_body_queen	18.822505475232	17.1680606175103	17.1850342846631	Queen4	north_america	34.3530949021735	0.00134722104252402	no
LOC105203038	whole_body_queen	18.822505475232	6.89310505229696	7.23289876168353	Queen2	north_america	14.1260038139805	0.0608075349407323	no
LOC105203038	whole_body_queen	18.822505475232	3.13885819257328	3.04332837308857	Queen6	north_america	6.18218656566185	-0.0336894443797355	no
LOC105203038	whole_body_queen	18.822505475232	11.7595035682417	11.7595035682417	Queen1	north_america	23.5190071364835	0	no
LOC105203039	whole_body_queen	20.9432287322717	11.509146706102	14.2021990744133	Queen6	north_america	25.7113457805154	0.281296650403463	no
LOC105203039	whole_body_queen	20.9432287322717	7.57327035823957	5.9781835141812	Queen3	north_america	13.5514538724208	-0.296994101111139	no
LOC105203039	whole_body_queen	20.9432287322717	6.67646801792069	7.63779301540584	Queen4	north_america	14.3142610333265	0.170220073870671	no
LOC105203039	whole_body_queen	20.9432287322717	9.47801944690832	10.8493481425253	Queen2	north_america	20.3273675894336	0.177441650905382	no
LOC105203039	whole_body_queen	20.9432287322717	12.9430764465804	12.7037742160618	Queen5	north_america	25.6468506626422	-0.0249756305141275	no
LOC105203039	whole_body_queen	20.9432287322717	12.7394621989286	8.81962767618131	Queen1	north_america	21.5590898751099	-0.484585305081689	no
LOC105203040	whole_body_queen	15.1421378127791	4.89979315343406	5.87975178412087	Queen1	north_america	10.7795449375549	0.221692140078784	no
LOC105203040	whole_body_queen	15.1421378127791	5.39294851940849	8.46918281070788	Queen5	north_america	13.8621313301164	0.566758450387375	no
LOC105203040	whole_body_queen	15.1421378127791	6.27771638514657	10.1444279102952	Queen6	north_america	16.4221442954418	0.614764823861915	no
LOC105203040	whole_body_queen	15.1421378127791	7.63024916333793	4.77362063462865	Queen4	north_america	12.4038697979666	-0.579925895951414	no
LOC105203040	whole_body_queen	15.1421378127791	6.03146692075984	14.4657975233671	Queen2	north_america	20.4972644441269	1.13718362650938	no
LOC105203040	whole_body_queen	15.1421378127791	9.46658794779946	11.9563670283624	Queen3	north_america	21.4229549761619	0.307870034559847	no
LOC105203041	whole_body_queen	3.40475801566867	3.81512458166897	0.95472412692573	Queen4	north_america	4.7698487085947	-1.30060811314715	no
LOC105203041	whole_body_queen	3.40475801566867	1.95991726137363	1.95991726137363	Queen1	north_america	3.91983452274725	0	no
LOC105203041	whole_body_queen	3.40475801566867	1.72327626307424	0.904112345210441	Queen2	north_america	2.62738860828468	-0.516224742049444	no
LOC105203041	whole_body_queen	3.40475801566867	5.39294851940849	6.35188710803091	Queen5	north_america	11.7448356274394	0.201633137203501	no
LOC105203041	whole_body_queen	3.40475801566867	1.04628606419109	1.01444279102952	Queen6	north_america	2.06072885522062	-0.0226270089030178	no
LOC105203041	whole_body_queen	3.40475801566867	1.89331758955989	0.996363919030199	Queen3	north_america	2.88968150859009	-0.535349956786319	no
LOC105203042	whole_body_queen	1.05246695776479	0.946658794779946	0	Queen3	north_america	0.946658794779946	-0.961000034434703	no
LOC105203042	whole_body_queen	1.05246695776479	0	1.05864785133848	Queen5	north_america	1.05864785133848	1.04169706621221	no
LOC105203042	whole_body_queen	1.05246695776479	0	0.904112345210441	Queen2	north_america	0.904112345210441	0.929118602120862	no
LOC105203042	whole_body_queen	1.05246695776479	1.04628606419109	0	Queen6	north_america	1.04628606419109	-1.03300784329498	no
LOC105203042	whole_body_queen	1.05246695776479	0.979958630686813	0.979958630686813	Queen1	north_america	1.95991726137363	0	no
LOC105203042	whole_body_queen	1.05246695776479	0.953781145417242	0.95472412692573	Queen4	north_america	1.90850527234297	0.00069614068680925	no
LOC105203044	whole_body_queen	2.4135211148607	2.83997638433984	1.9927278380604	Queen3	north_america	4.83270422240024	-0.359636353934307	no
LOC105203044	whole_body_queen	2.4135211148607	2.1571794077634	0	Queen5	north_america	2.1571794077634	-1.65863624460286	no
LOC105203044	whole_body_queen	2.4135211148607	0	1.01444279102952	Queen6	north_america	1.01444279102952	1.01038083439196	no
LOC105203044	whole_body_queen	2.4135211148607	0.86163813153712	1.80822469042088	Queen2	north_america	2.669862821958	0.593085705958935	no
LOC105203044	whole_body_queen	2.4135211148607	0.979958630686813	0	Queen1	north_america	0.979958630686813	-0.985470286907669	no
LOC105203044	whole_body_queen	2.4135211148607	0.953781145417242	2.86417238077719	Queen4	north_america	3.81795352619443	0.983890582701003	no
LOC105203046	whole_body_queen	1.42725537730599	0	1.80822469042088	Queen2	north_america	1.80822469042088	1.48965837253255	no
LOC105203046	whole_body_queen	1.42725537730599	0.979958630686813	0	Queen1	north_america	0.979958630686813	-0.985470286907669	no
LOC105203046	whole_body_queen	1.42725537730599	1.04628606419109	0	Queen6	north_america	1.04628606419109	-1.03300784329498	no
LOC105203046	whole_body_queen	1.42725537730599	1.89331758955989	1.9927278380604	Queen3	north_america	3.88604542762029	0.0487363928863094	no
LOC105203046	whole_body_queen	1.42725537730599	0	0.95472412692573	Queen4	north_america	0.95472412692573	0.966965012238482	no
LOC105203046	whole_body_queen	1.42725537730599	1.0785897038817	2.11729570267697	Queen5	north_america	3.19588540655867	0.584690003221407	no
LOC105203048	whole_body_queen	18.0456839932734	8.37028851352876	8.11554232823618	Queen6	north_america	16.4858308417649	-0.0397649777015708	no
LOC105203048	whole_body_queen	18.0456839932734	8.6163813153712	9.04112345210441	Queen2	north_america	17.6575047674756	0.0623546853659317	no
LOC105203048	whole_body_queen	18.0456839932734	9.46658794779946	8.9672752712718	Queen3	north_america	18.4338632190713	-0.0705201302211819	no
LOC105203048	whole_body_queen	18.0456839932734	9.53781145417242	6.68306888848011	Queen4	north_america	16.2208803426525	-0.455820677480485	no
LOC105203048	whole_body_queen	18.0456839932734	14.6993794603022	16.6592967216758	Queen1	north_america	31.358676181978	0.169720353333226	no
LOC105203048	whole_body_queen	18.0456839932734	10.785897038817	14.8210699187388	Queen5	north_america	25.6069669575558	0.424785599060123	no
LOC105203049	whole_body_queen	27.0154307178005	14.0216661504621	12.7037742160618	Queen5	north_america	26.7254403665239	-0.132471553566701	no
LOC105203049	whole_body_queen	27.0154307178005	18.1218417629276	11.4566895231088	Queen4	north_america	29.5785312860364	-0.618300776246421	no
LOC105203049	whole_body_queen	27.0154307178005	13.7194208296154	13.7194208296154	Queen1	north_america	27.4388416592308	0	no
LOC105203049	whole_body_queen	27.0154307178005	14.647848236131	12.6575728329462	Queen2	north_america	27.3054210690772	-0.196263166552746	no
LOC105203049	whole_body_queen	27.0154307178005	17.039858306039	7.9709113522416	Queen3	north_america	25.0107696582806	-1.00786154633155	no
LOC105203049	whole_body_queen	27.0154307178005	8.37028851352876	11.1588707013248	Queen6	north_america	19.5291592148535	0.375843864911024	no
LOC105203050	whole_body_queen	37.1383568820622	17.2574352621072	21.1729570267697	Queen5	north_america	38.4303922888769	0.280317068508537	no
LOC105203050	whole_body_queen	37.1383568820622	18.6192139830494	18.6192139830494	Queen1	north_america	37.2384279660989	0	no
LOC105203050	whole_body_queen	37.1383568820622	17.7868630912486	18.2599702385314	Queen6	north_america	36.04683332978	0.0358812788678761	no
LOC105203050	whole_body_queen	37.1383568820622	20.0294040537621	15.2755860308117	Queen4	north_america	35.3049900845738	-0.369698475455925	no
LOC105203050	whole_body_queen	37.1383568820622	18.9560388938166	18.0822469042088	Queen2	north_america	37.0382857980255	-0.0645943298470952	no
LOC105203050	whole_body_queen	37.1383568820622	19.8798346903789	17.9345505425436	Queen3	north_america	37.8143852329225	-0.141089114097329	no
LOC105203051	whole_body_queen	2.72447200059771	1.04628606419109	4.05777116411809	Queen6	north_america	5.10405722830919	1.30549392129407	no
LOC105203051	whole_body_queen	2.72447200059771	0.979958630686813	0.979958630686813	Queen1	north_america	1.95991726137363	0	no
LOC105203051	whole_body_queen	2.72447200059771	1.0785897038817	0	Queen5	north_america	1.0785897038817	-1.05560501043652	no
LOC105203051	whole_body_queen	2.72447200059771	2.58491439461136	0.904112345210441	Queen2	north_america	3.4890267398218	-0.912820066612669	no
LOC105203051	whole_body_queen	2.72447200059771	3.78663517911978	0.996363919030199	Queen3	north_america	4.78299909814998	-1.26163711812533	no
LOC105203051	whole_body_queen	2.72447200059771	0	0.95472412692573	Queen4	north_america	0.95472412692573	0.966965012238482	no
LOC105203052	whole_body_queen	39.8229452533037	20.6793151568909	20.7945839398401	Queen2	north_america	41.473899096731	0.00765047969875259	no
LOC105203052	whole_body_queen	39.8229452533037	23.0182934122041	19.2744130295609	Queen6	north_america	42.292706441765	-0.244473498751076	no
LOC105203052	whole_body_queen	39.8229452533037	17.1680606175103	21.0039307923661	Queen4	north_america	38.1719914098764	0.276356845781784	no
LOC105203052	whole_body_queen	39.8229452533037	25.4789243978571	22.5390485057967	Queen1	north_america	48.0179729036538	-0.169788514513994	no
LOC105203052	whole_body_queen	39.8229452533037	17.2574352621072	16.9383656214158	Queen5	north_america	34.1958008835229	-0.0254356638536829	no
LOC105203052	whole_body_queen	39.8229452533037	20.8264934851588	16.9381866235134	Queen3	north_america	37.7646801086722	-0.283046318957371	no
LOC105203053	whole_body_queen	10.9800348914623	5.87975178412087	7.8396690454945	Queen1	north_america	13.7194208296154	0.361635841970426	no
LOC105203053	whole_body_queen	10.9800348914623	5.23143032095547	7.10109953720666	Queen6	north_america	12.3325298581621	0.378554385969408	no
LOC105203053	whole_body_queen	10.9800348914623	5.16982878922272	2.71233703563132	Queen2	north_america	7.88216582485404	-0.732902759804019	no
LOC105203053	whole_body_queen	10.9800348914623	3.81512458166897	2.86417238077719	Queen4	north_america	6.67929696244616	-0.317413671132956	no
LOC105203053	whole_body_queen	10.9800348914623	5.39294851940849	4.23459140535394	Queen5	north_america	9.62753992476243	-0.288404546661333	no
LOC105203053	whole_body_queen	10.9800348914623	6.62661156345962	7.9709113522416	Queen3	north_america	14.5975229157012	0.234212332882933	no
LOC105203055	whole_body_queen	5.87926252490078	2.93987589206044	2.93987589206044	Queen1	north_america	5.87975178412087	0	no
LOC105203055	whole_body_queen	5.87926252490078	2.1571794077634	4.23459140535394	Queen5	north_america	6.39177081311733	0.729440685012571	no
LOC105203055	whole_body_queen	5.87926252490078	1.90756229083448	1.90944825385146	Queen4	north_america	3.81701054468594	0.000935487246009695	no
LOC105203055	whole_body_queen	5.87926252490078	4.18514425676438	3.04332837308857	Queen6	north_america	7.22847262985295	-0.358840752289675	no
LOC105203055	whole_body_queen	5.87926252490078	1.72327626307424	0.904112345210441	Queen2	north_america	2.62738860828468	-0.516224742049444	no
LOC105203055	whole_body_queen	5.87926252490078	1.89331758955989	3.9854556761208	Queen3	north_america	5.87877326568069	0.785000682908611	no
LOC105203056	whole_body_queen	30.0115733470893	12.9430764465804	16.9383656214158	Queen5	north_america	29.8814420679961	0.363499533823625	no
LOC105203056	whole_body_queen	30.0115733470893	14.6480048986753	15.2166418654428	Queen6	north_america	29.8646467641182	0.0514963708295875	no
LOC105203056	whole_body_queen	30.0115733470893	14.1998819216992	15.9418227044832	Queen3	north_america	30.1417046261824	0.156528980616356	no
LOC105203056	whole_body_queen	30.0115733470893	12.3991548904241	14.320861903886	Queen4	north_america	26.7200167943101	0.193355450969601	no
LOC105203056	whole_body_queen	30.0115733470893	14.647848236131	19.8904715946297	Queen2	north_america	34.5383198307607	0.416880777880259	no
LOC105203056	whole_body_queen	30.0115733470893	20.5791312444231	18.6192139830494	Queen1	north_america	39.1983452274725	-0.137369541333226	no
LOC105203057	whole_body_queen	14.846572082644	9.46658794779946	5.9781835141812	Queen3	north_america	15.4447714619807	-0.584867764440996	no
LOC105203057	whole_body_queen	14.846572082644	3.2357691116451	7.41053495936939	Queen5	north_america	10.6463040710145	0.989573615936601	no
LOC105203057	whole_body_queen	14.846572082644	3.91983452274725	5.87975178412087	Queen1	north_america	9.79958630686813	0.483746722858358	no
LOC105203057	whole_body_queen	14.846572082644	6.03146692075984	9.94523579731485	Queen2	north_america	15.9767027180747	0.638405431214033	no
LOC105203057	whole_body_queen	14.846572082644	7.63024916333793	7.63779301540584	Queen4	north_america	15.2680421787438	0.00126053417605818	no
LOC105203057	whole_body_queen	14.846572082644	7.32400244933766	7.10109953720666	Queen6	north_america	14.4251019865443	-0.0391596557595638	no
LOC105203058	whole_body_queen	1.036545321184	0	0.979958630686813	Queen1	north_america	0.979958630686813	0.985470286907668	no
LOC105203058	whole_body_queen	1.036545321184	0.86163813153712	0.904112345210441	Queen2	north_america	1.76575047674756	0.0325459355472472	no
LOC105203058	whole_body_queen	1.036545321184	0	1.05864785133848	Queen5	north_america	1.05864785133848	1.04169706621221	no
LOC105203058	whole_body_queen	1.036545321184	0.953781145417242	0.95472412692573	Queen4	north_america	1.90850527234297	0.00069614068680925	no
LOC105203058	whole_body_queen	1.036545321184	0	1.01444279102952	Queen6	north_america	1.01444279102952	1.01038083439196	no
LOC105203058	whole_body_queen	1.036545321184	0	0.996363919030199	Queen3	north_america	0.996363919030199	0.997374734865391	no
LOC105203059	whole_body_queen	2.90130801605452	1.04628606419109	1.01444279102952	Queen6	north_america	2.06072885522062	-0.0226270089030178	no
LOC105203059	whole_body_queen	2.90130801605452	0.946658794779946	1.9927278380604	Queen3	north_america	2.93938663284035	0.620461050103316	no
LOC105203059	whole_body_queen	2.90130801605452	1.0785897038817	3.17594355401545	Queen5	north_america	4.25453325789715	1.00649720077866	no
LOC105203059	whole_body_queen	2.90130801605452	0.953781145417242	1.90944825385146	Queen4	north_america	2.8632293992687	0.574476715635429	no
LOC105203059	whole_body_queen	2.90130801605452	0.979958630686813	0.979958630686813	Queen1	north_america	1.95991726137363	0	no
LOC105203059	whole_body_queen	2.90130801605452	1.72327626307424	3.61644938084176	Queen2	north_america	5.339725643916	0.761440323477745	no
LOC105203060	whole_body_queen	11.1310139843116	6.27771638514657	6.08665674617714	Queen6	north_america	12.3643731313237	-0.0383806585715575	no
LOC105203060	whole_body_queen	11.1310139843116	6.47153822329019	5.29323925669242	Queen5	north_america	11.7647774799826	-0.247602499959516	no
LOC105203060	whole_body_queen	11.1310139843116	6.85971041480769	5.87975178412087	Queen1	north_america	12.7394621989286	-0.192119643839589	no
LOC105203060	whole_body_queen	11.1310139843116	4.76890572708621	5.72834476155438	Queen4	north_america	10.4972504886406	0.221953943726224	no
LOC105203060	whole_body_queen	11.1310139843116	2.58491439461136	3.61644938084176	Queen2	north_america	6.20136377545312	0.36484499891452	no
LOC105203060	whole_body_queen	11.1310139843116	1.89331758955989	1.9927278380604	Queen3	north_america	3.88604542762029	0.0487363928863094	no
LOC105203061	whole_body_queen	18.8490346475504	7.75474318383408	9.04112345210441	Queen2	north_america	16.7958666359385	0.197783930769252	no
LOC105203061	whole_body_queen	18.8490346475504	7.32400244933766	11.1588707013248	Queen6	north_america	18.4828731506624	0.546659944834472	no
LOC105203061	whole_body_queen	18.8490346475504	7.63024916333793	9.5472412692573	Queen4	north_america	17.1774904325952	0.289391580667435	no
LOC105203061	whole_body_queen	18.8490346475504	8.62871763105359	10.5864785133848	Queen5	north_america	19.2151961444384	0.267026578237293	no
LOC105203061	whole_body_queen	18.8490346475504	11.3599055373594	16.9381866235134	Queen3	north_america	28.2980921608727	0.53736633792152	no
LOC105203061	whole_body_queen	18.8490346475504	9.79958630686813	13.7194208296154	Queen1	north_america	23.5190071364835	0.446744857254464	no
LOC105203063	whole_body_queen	3.90293997518377	0	1.90944825385146	Queen4	north_america	1.90944825385146	1.5407455871871	no
LOC105203063	whole_body_queen	3.90293997518377	0.86163813153712	0	Queen2	north_america	0.86163813153712	-0.896572666573614	no
LOC105203063	whole_body_queen	3.90293997518377	11.8644867426987	9.52783066204636	Queen5	north_america	21.392317404745	-0.289185709769076	no
LOC105203063	whole_body_queen	3.90293997518377	1.04628606419109	3.04332837308857	Queen6	north_america	4.08961443727966	0.982535531471878	no
LOC105203063	whole_body_queen	3.90293997518377	1.95991726137363	1.95991726137363	Queen1	north_america	3.91983452274725	0	no
LOC105203063	whole_body_queen	3.90293997518377	1.89331758955989	1.9927278380604	Queen3	north_america	3.88604542762029	0.0487363928863094	no
LOC105203064	whole_body_queen	7.27665213826625	4.18514425676438	4.05777116411809	Queen6	north_america	8.24291542088247	-0.0358823624674825	no
LOC105203064	whole_body_queen	7.27665213826625	4.89979315343406	5.87975178412087	Queen1	north_america	10.7795449375549	0.221692140078784	no
LOC105203064	whole_body_queen	7.27665213826625	4.31435881552679	3.17594355401545	Queen5	north_america	7.49030236954225	-0.34779342796155	no
LOC105203064	whole_body_queen	7.27665213826625	3.44655252614848	3.61644938084176	Queen2	north_america	7.06300190699024	0.0540964396594278	no
LOC105203064	whole_body_queen	7.27665213826625	1.89331758955989	3.9854556761208	Queen3	north_america	5.87877326568069	0.785000682908611	no
LOC105203064	whole_body_queen	7.27665213826625	3.81512458166897	1.90944825385146	Queen4	north_america	5.72457283552043	-0.726827538198531	no
LOC105203065	whole_body_queen	22.999302896061	2.93987589206044	19.5991726137363	Queen1	north_america	22.5390485057967	2.38636430135124	na
LOC105203065	whole_body_queen	22.999302896061	4.76890572708621	28.6417238077719	Queen4	north_america	33.4106295348581	2.36125975687061	na
LOC105203065	whole_body_queen	22.999302896061	3.78663517911978	11.9563670283624	Queen3	north_america	15.7430022074822	1.43657748443061	na
LOC105203065	whole_body_queen	22.999302896061	4.18514425676438	19.2744130295609	Queen6	north_america	23.4595572863253	1.96720411499349	na
LOC105203065	whole_body_queen	22.999302896061	5.39294851940849	27.5248441348006	Queen5	north_america	32.9177926542091	2.15766562198469	na
LOC105203065	whole_body_queen	22.999302896061	6.03146692075984	14.4657975233671	Queen2	north_america	20.4972644441269	1.13718362650938	na
LOC105203066	whole_body_queen	5.00915492406062	2.09257212838219	3.04332837308857	Queen6	north_america	5.13590050147076	0.386736131045963	no
LOC105203066	whole_body_queen	5.00915492406062	0.979958630686813	1.95991726137363	Queen1	north_america	2.93987589206044	0.580086561826869	no
LOC105203066	whole_body_queen	5.00915492406062	1.89331758955989	2.9890917570906	Queen3	north_america	4.88240934665049	0.463335617027086	no
LOC105203066	whole_body_queen	5.00915492406062	0.86163813153712	2.71233703563132	Queen2	north_america	3.57397516716844	0.99575502922616	no
LOC105203066	whole_body_queen	5.00915492406062	2.1571794077634	3.17594355401545	Queen5	north_america	5.33312296177885	0.403465966612326	no
LOC105203066	whole_body_queen	5.00915492406062	1.90756229083448	3.81889650770292	Queen4	north_america	5.7264587985374	0.728892717649147	no
LOC105203067	whole_body_queen	3.15145016298519	2.09257212838219	1.01444279102952	Queen6	north_america	3.10701491941171	-0.618426409328933	no
LOC105203067	whole_body_queen	3.15145016298519	3.91983452274725	2.93987589206044	Queen1	north_america	6.85971041480769	-0.320459606911364	no
LOC105203067	whole_body_queen	3.15145016298519	0.86163813153712	1.80822469042088	Queen2	north_america	2.669862821958	0.593085705958935	no
LOC105203067	whole_body_queen	3.15145016298519	2.86134343625172	1.90944825385146	Queen4	north_america	4.77079169010319	-0.408357289222251	no
LOC105203067	whole_body_queen	3.15145016298519	1.0785897038817	2.11729570267697	Queen5	north_america	3.19588540655867	0.584690003221407	no
LOC105203067	whole_body_queen	3.15145016298519	1.89331758955989	0.996363919030199	Queen3	north_america	2.88968150859009	-0.535349956786319	no
LOC105203068	whole_body_queen	2.96920052275942	0.86163813153712	1.80822469042088	Queen2	north_america	2.669862821958	0.593085705958935	no
LOC105203068	whole_body_queen	2.96920052275942	1.89331758955989	0	Queen3	north_america	1.89331758955989	-1.53272469165171	no
LOC105203068	whole_body_queen	2.96920052275942	1.04628606419109	2.02888558205905	Queen6	north_america	3.07517164625014	0.565779237210777	no
LOC105203068	whole_body_queen	2.96920052275942	0.953781145417242	1.90944825385146	Queen4	north_america	2.8632293992687	0.574476715635429	no
LOC105203068	whole_body_queen	2.96920052275942	19.5991726137363	13.7194208296154	Queen1	north_america	33.3185934433516	-0.484865485023254	no
LOC105203068	whole_body_queen	2.96920052275942	1.0785897038817	2.11729570267697	Queen5	north_america	3.19588540655867	0.584690003221407	no
LOC105203069	whole_body_queen	1.95146998759189	0.86163813153712	0.904112345210441	Queen2	north_america	1.76575047674756	0.0325459355472472	no
LOC105203069	whole_body_queen	1.95146998759189	0.946658794779946	0.996363919030199	Queen3	north_america	1.94302271381015	0.0363747004306876	no
LOC105203069	whole_body_queen	1.95146998759189	0.979958630686813	0.979958630686813	Queen1	north_america	1.95991726137363	0	no
LOC105203069	whole_body_queen	1.95146998759189	1.0785897038817	1.05864785133848	Queen5	north_america	2.13723755522018	-0.0139079442243087	no
LOC105203069	whole_body_queen	1.95146998759189	1.04628606419109	1.01444279102952	Queen6	north_america	2.06072885522062	-0.0226270089030178	no
LOC105203069	whole_body_queen	1.95146998759189	0.953781145417242	0.95472412692573	Queen4	north_america	1.90850527234297	0.00069614068680925	no
LOC105203070	whole_body_queen	1.44340719715129	0.946658794779946	0	Queen3	north_america	0.946658794779946	-0.961000034434703	no
LOC105203070	whole_body_queen	1.44340719715129	0	1.80822469042088	Queen2	north_america	1.80822469042088	1.48965837253255	no
LOC105203070	whole_body_queen	1.44340719715129	1.0785897038817	0	Queen5	north_america	1.0785897038817	-1.05560501043652	no
LOC105203070	whole_body_queen	1.44340719715129	0	1.95991726137363	Queen1	north_america	1.95991726137363	1.56555684873454	no
LOC105203070	whole_body_queen	1.44340719715129	0	0	Queen6	north_america	0	0	no
LOC105203070	whole_body_queen	1.44340719715129	0.953781145417242	0.95472412692573	Queen4	north_america	1.90850527234297	0.00069614068680925	no
LOC105203071	whole_body_queen	2.50030237364053	1.04628606419109	1.01444279102952	Queen6	north_america	2.06072885522062	-0.0226270089030178	no
LOC105203071	whole_body_queen	2.50030237364053	0.953781145417242	0.95472412692573	Queen4	north_america	1.90850527234297	0.00069614068680925	no
LOC105203071	whole_body_queen	2.50030237364053	0.979958630686813	1.95991726137363	Queen1	north_america	2.93987589206044	0.580086561826869	no
LOC105203071	whole_body_queen	2.50030237364053	2.1571794077634	1.05864785133848	Queen5	north_america	3.21582725910188	-0.616939178390645	no
LOC105203071	whole_body_queen	2.50030237364053	1.89331758955989	0	Queen3	north_america	1.89331758955989	-1.53272469165171	no
LOC105203071	whole_body_queen	2.50030237364053	3.44655252614848	3.61644938084176	Queen2	north_america	7.06300190699024	0.0540964396594278	no
LOC105203072	whole_body_queen	37.947100797344	15.679338090989	23.5190071364835	Queen1	north_america	39.1983452274725	0.55583852278148	no
LOC105203072	whole_body_queen	37.947100797344	16.1788455582255	16.9383656214158	Queen5	north_america	33.1172111796412	0.0624153625003804	no
LOC105203072	whole_body_queen	37.947100797344	15.6942909628664	23.332184193679	Queen6	north_america	39.0264751565455	0.543511009708989	no
LOC105203072	whole_body_queen	37.947100797344	14.3067171812586	17.1850342846631	Queen4	north_america	31.4917514659218	0.248586743319695	no
LOC105203072	whole_body_queen	37.947100797344	20.6793151568909	21.6986962850506	Queen2	north_america	42.3780114419415	0.0662902546268642	no
LOC105203072	whole_body_queen	37.947100797344	18.9331758955989	17.9345505425436	Queen3	north_america	36.8677264381425	-0.0741504131781652	no
LOC105203073	whole_body_queen	1.83712787454527	0.953781145417242	0.95472412692573	Queen4	north_america	1.90850527234297	0.00069614068680925	no
LOC105203073	whole_body_queen	1.83712787454527	1.04628606419109	1.01444279102952	Queen6	north_america	2.06072885522062	-0.0226270089030178	no
LOC105203073	whole_body_queen	1.83712787454527	0.979958630686813	0.979958630686813	Queen1	north_america	1.95991726137363	0	no
LOC105203073	whole_body_queen	1.83712787454527	0.86163813153712	0.904112345210441	Queen2	north_america	1.76575047674756	0.0325459355472472	no
LOC105203073	whole_body_queen	1.83712787454527	1.0785897038817	0	Queen5	north_america	1.0785897038817	-1.05560501043652	no
LOC105203073	whole_body_queen	1.83712787454527	0.946658794779946	0	Queen3	north_america	0.946658794779946	-0.961000034434703	no
LOC105203074	whole_body_queen	72.4802189824816	37.8663517911979	27.8981897328456	Queen3	north_america	65.7645415240434	-0.427542573850346	no
LOC105203074	whole_body_queen	72.4802189824816	31.0189727353363	11.7534604877357	Queen2	north_america	42.772433223072	-1.32803826563762	no
LOC105203074	whole_body_queen	72.4802189824816	44.9903007602171	38.5488260591219	Queen6	north_america	83.5391268193389	-0.217694761121571	no
LOC105203074	whole_body_queen	72.4802189824816	46.7352761254448	32.4606203154748	Queen4	north_america	79.1958964409197	-0.51259161336037	no
LOC105203074	whole_body_queen	72.4802189824816	32.3386348126648	29.3987589206044	Queen1	north_america	61.7373937332692	-0.133182603989588	no
LOC105203074	whole_body_queen	72.4802189824816	51.7723057863215	40.2286183508624	Queen5	north_america	92.0009241371839	-0.356134906154629	no
LOC105203075	whole_body_queen	1.01312234743895	0.86163813153712	0	Queen2	north_america	0.86163813153712	-0.896572666573614	no
LOC105203075	whole_body_queen	1.01312234743895	0	0.979958630686813	Queen1	north_america	0.979958630686813	0.985470286907668	no
LOC105203075	whole_body_queen	1.01312234743895	0.953781145417242	0.95472412692573	Queen4	north_america	1.90850527234297	0.00069614068680925	no
LOC105203075	whole_body_queen	1.01312234743895	1.0785897038817	0	Queen5	north_america	1.0785897038817	-1.05560501043652	no
LOC105203075	whole_body_queen	1.01312234743895	0.946658794779946	0	Queen3	north_america	0.946658794779946	-0.961000034434703	no
LOC105203075	whole_body_queen	1.01312234743895	1.04628606419109	0	Queen6	north_america	1.04628606419109	-1.03300784329498	no
LOC105203076	whole_body_queen	4.35504420457296	1.90756229083448	4.77362063462865	Queen4	north_america	6.68118292546314	0.989666216063623	no
LOC105203076	whole_body_queen	4.35504420457296	1.72327626307424	2.71233703563132	Queen2	north_america	4.43561329870556	0.446984351629469	no
LOC105203076	whole_body_queen	4.35504420457296	0.946658794779946	3.9854556761208	Queen3	north_america	4.93211447090074	1.35672534012562	no
LOC105203076	whole_body_queen	4.35504420457296	1.04628606419109	2.02888558205905	Queen6	north_america	3.07517164625014	0.565779237210777	no
LOC105203076	whole_body_queen	4.35504420457296	0.979958630686813	2.93987589206044	Queen1	north_america	3.91983452274725	0.992679897918909	no
LOC105203076	whole_body_queen	4.35504420457296	2.1571794077634	2.11729570267697	Queen5	north_america	4.27447511044037	-0.0183412309449293	no
LOC105203077	whole_body_queen	15.950580707575	5.16982878922272	11.7534604877357	Queen2	north_america	16.9232892769584	1.04758639625935	no
LOC105203077	whole_body_queen	15.950580707575	5.23143032095547	14.2021990744133	Queen6	north_america	19.4336293953688	1.28664477887479	no
LOC105203077	whole_body_queen	15.950580707575	3.78663517911978	8.9672752712718	Queen3	north_america	12.7539104503916	1.05818731964958	no
LOC105203077	whole_body_queen	15.950580707575	2.1571794077634	7.41053495936939	Queen5	north_america	9.56771436713279	1.41356132266517	no
LOC105203077	whole_body_queen	15.950580707575	8.58403030875517	7.63779301540584	Queen4	north_america	16.221823324161	-0.149969724413297	no
LOC105203077	whole_body_queen	15.950580707575	7.8396690454945	7.8396690454945	Queen1	north_america	15.679338090989	0	no
LOC105203078	whole_body_queen	3.02524950108925	0	4.05777116411809	Queen6	north_america	4.05777116411809	2.33850176458905	na
LOC105203078	whole_body_queen	3.02524950108925	0.979958630686813	5.87975178412087	Queen1	north_america	6.85971041480769	1.79688622768863	na
LOC105203078	whole_body_queen	3.02524950108925	0	1.90944825385146	Queen4	north_america	1.90944825385146	1.5407455871871	na
LOC105203078	whole_body_queen	3.02524950108925	0	4.23459140535394	Queen5	north_america	4.23459140535394	2.38807692961543	na
LOC105203078	whole_body_queen	3.02524950108925	0	1.80822469042088	Queen2	north_america	1.80822469042088	1.48965837253255	na
LOC105203078	whole_body_queen	3.02524950108925	0	1.9927278380604	Queen3	north_america	1.9927278380604	1.58146108453802	na
LOC105203079	whole_body_queen	1.95146998759189	0	1.05864785133848	Queen5	north_america	1.05864785133848	1.04169706621221	no
LOC105203079	whole_body_queen	1.95146998759189	1.04628606419109	1.01444279102952	Queen6	north_america	2.06072885522062	-0.0226270089030178	no
LOC105203079	whole_body_queen	1.95146998759189	0.946658794779946	0.996363919030199	Queen3	north_america	1.94302271381015	0.0363747004306876	no
LOC105203079	whole_body_queen	1.95146998759189	0.953781145417242	1.90944825385146	Queen4	north_america	2.8632293992687	0.574476715635429	no
LOC105203079	whole_body_queen	1.95146998759189	0.979958630686813	0.979958630686813	Queen1	north_america	1.95991726137363	0	no
LOC105203079	whole_body_queen	1.95146998759189	0	0.904112345210441	Queen2	north_america	0.904112345210441	0.929118602120862	no
LOC105203080	whole_body_queen	13.8984046224222	2.83997638433984	0.996363919030199	Queen3	north_america	3.83634030337004	-0.943722703606935	no
LOC105203080	whole_body_queen	13.8984046224222	11.7595035682417	24.4989657671703	Queen1	north_america	36.2584693354121	0.998866533342568	no
LOC105203080	whole_body_queen	13.8984046224222	10.4915925995897	7.63779301540584	Queen4	north_america	18.1293856149955	-0.411844101161319	no
LOC105203080	whole_body_queen	13.8984046224222	10.4628606419109	20.2888558205905	Queen6	north_america	30.7517164625014	0.8931312892839	no
LOC105203080	whole_body_queen	13.8984046224222	0.86163813153712	0.904112345210441	Queen2	north_america	1.76575047674756	0.0325459355472472	no
LOC105203080	whole_body_queen	13.8984046224222	7.55012792717189	2.11729570267697	Queen5	north_america	9.66742362984886	-1.45565099213193	no
LOC105203081	whole_body_queen	2.77977216527405	2.1571794077634	2.11729570267697	Queen5	north_america	4.27447511044037	-0.0183412309449293	no
LOC105203081	whole_body_queen	2.77977216527405	0.979958630686813	0.979958630686813	Queen1	north_america	1.95991726137363	0	no
LOC105203081	whole_body_queen	2.77977216527405	1.89331758955989	0.996363919030199	Queen3	north_america	2.88968150859009	-0.535349956786319	no
LOC105203081	whole_body_queen	2.77977216527405	0.86163813153712	1.80822469042088	Queen2	north_america	2.669862821958	0.593085705958935	no
LOC105203081	whole_body_queen	2.77977216527405	1.04628606419109	1.01444279102952	Queen6	north_america	2.06072885522062	-0.0226270089030178	no
LOC105203081	whole_body_queen	2.77977216527405	1.90756229083448	3.81889650770292	Queen4	north_america	5.7264587985374	0.728892717649147	no
LOC105203082	whole_body_queen	32.2660729571743	12.5554327702931	21.30329861162	Queen6	north_america	33.8587313819131	0.718385924186446	no
LOC105203082	whole_body_queen	32.2660729571743	15.1465407164791	16.9381866235134	Queen3	north_america	32.0847273399925	0.151808944475317	no
LOC105203082	whole_body_queen	32.2660729571743	16.3711244992053	21.6986962850506	Queen2	north_america	38.0698207842559	0.38591828950292	no
LOC105203082	whole_body_queen	32.2660729571743	13.3529360358414	19.0944825385146	Queen4	north_america	32.447418574356	0.485453541715748	no
LOC105203082	whole_body_queen	32.2660729571743	6.85971041480769	7.8396690454945	Queen1	north_america	14.6993794603022	0.169516198130837	no
LOC105203082	whole_body_queen	32.2660729571743	9.70730733493528	14.8210699187388	Queen5	north_america	24.5283772536741	0.56325144917654	no
LOC105203085	whole_body_queen	1.05246695776479	0	0.979958630686813	Queen1	north_america	0.979958630686813	0.985470286907668	no
LOC105203085	whole_body_queen	1.05246695776479	0	1.05864785133848	Queen5	north_america	1.05864785133848	1.04169706621221	no
LOC105203085	whole_body_queen	1.05246695776479	0.946658794779946	0.996363919030199	Queen3	north_america	1.94302271381015	0.0363747004306876	no
LOC105203085	whole_body_queen	1.05246695776479	1.72327626307424	1.80822469042088	Queen2	north_america	3.53150095349512	0.0443150283622435	no
LOC105203085	whole_body_queen	1.05246695776479	0.953781145417242	0	Queen4	north_america	0.953781145417242	-0.966268871551673	no
LOC105203085	whole_body_queen	1.05246695776479	1.04628606419109	0	Queen6	north_america	1.04628606419109	-1.03300784329498	no
LOC105203086	whole_body_queen	26.973149817863	28.0433323009242	4.23459140535394	Queen5	north_america	32.2779237062781	-2.47205815642283	na
LOC105203086	whole_body_queen	26.973149817863	43.8739326891931	2.86417238077719	Queen4	north_america	46.7381050699703	-3.53764626598107	na
LOC105203086	whole_body_queen	26.973149817863	41.8514425676438	5.07221395514762	Queen6	north_america	46.9236565227914	-2.81904924231771	na
LOC105203086	whole_body_queen	26.973149817863	18.9560388938166	2.71233703563132	Queen2	north_america	21.668375929448	-2.42642578532556	na
LOC105203086	whole_body_queen	26.973149817863	19.5991726137363	1.95991726137363	Queen1	north_america	21.5590898751099	-2.79895763744328	na
LOC105203086	whole_body_queen	26.973149817863	18.9331758955989	1.9927278380604	Queen3	north_america	20.9259037336593	-2.73563859929225	na
LOC105203087	whole_body_queen	14.1743326843828	4.18514425676438	0	Queen6	north_america	4.18514425676438	-2.37438412705653	no
LOC105203087	whole_body_queen	14.1743326843828	14.1998819216992	9.963639190302	Queen3	north_america	24.1635211120012	-0.471333360877678	no
LOC105203087	whole_body_queen	14.1743326843828	18.1218417629276	10.501965396183	Queen4	north_america	28.6238071591106	-0.733341083929361	no
LOC105203087	whole_body_queen	14.1743326843828	14.647848236131	13.5616851781566	Queen2	north_america	28.2095334142876	-0.103786959425983	no
LOC105203087	whole_body_queen	14.1743326843828	0.979958630686813	0	Queen1	north_america	0.979958630686813	-0.985470286907669	no
LOC105203087	whole_body_queen	14.1743326843828	1.0785897038817	0	Queen5	north_america	1.0785897038817	-1.05560501043652	no
LOC105203090	whole_body_queen	6.3605499368524	0.86163813153712	0.904112345210441	Queen2	north_america	1.76575047674756	0.0325459355472472	no
LOC105203090	whole_body_queen	6.3605499368524	0.953781145417242	0.95472412692573	Queen4	north_america	1.90850527234297	0.00069614068680925	no
LOC105203090	whole_body_queen	6.3605499368524	3.78663517911978	6.9745474332114	Queen3	north_america	10.7611826123312	0.736390793236233	no
LOC105203090	whole_body_queen	6.3605499368524	7.55012792717189	12.7037742160618	Queen5	north_america	20.2539021432337	0.680555375926034	no
LOC105203090	whole_body_queen	6.3605499368524	0.979958630686813	0.979958630686813	Queen1	north_america	1.95991726137363	0	no
LOC105203090	whole_body_queen	6.3605499368524	6.27771638514657	16.2310846564724	Queen6	north_america	22.5088010416189	1.24345578358261	no
LOC105203091	whole_body_queen	81.63752545422	37.0504396560962	54.2467407126264	Queen2	north_america	91.2971803687226	0.537976231534574	na
LOC105203091	whole_body_queen	81.63752545422	36.2436835258552	54.4192752347666	Queen4	north_america	90.6629587606218	0.573392076230062	na
LOC105203091	whole_body_queen	81.63752545422	33.1330578172981	47.8254681134496	Queen3	north_america	80.9585259307477	0.516464211624962	na
LOC105203091	whole_body_queen	81.63752545422	31.358676181978	50.9578487957142	Queen1	north_america	82.3165249776923	0.683189113075586	na
LOC105203091	whole_body_queen	81.63752545422	24.8075631892791	53.9910404182627	Queen5	north_america	78.7986036075418	1.09140265711767	na
LOC105203091	whole_body_queen	81.63752545422	27.2034376689685	31.4477265219152	Queen6	north_america	58.6511641908837	0.202246377104424	na
LOC105203092	whole_body_queen	28.4746853887789	12.3991548904241	15.2755860308117	Queen4	north_america	27.6747409212358	0.280567480975156	no
LOC105203092	whole_body_queen	28.4746853887789	13.7862101045939	16.2740222137879	Queen2	north_america	30.0602323183818	0.224351731426492	no
LOC105203092	whole_body_queen	28.4746853887789	14.1998819216992	14.945458785453	Queen3	north_america	29.1453407071522	0.0690854913304287	no
LOC105203092	whole_body_queen	28.4746853887789	14.6993794603022	11.7595035682417	Queen1	north_america	26.4588830285439	-0.299135336213176	no
LOC105203092	whole_body_queen	28.4746853887789	15.1002558543438	12.7037742160618	Queen5	north_america	27.8040300704056	-0.232510328024412	no
LOC105203092	whole_body_queen	28.4746853887789	18.8331491554397	16.2310846564724	Queen6	north_america	35.0642338119121	-0.202900251667266	no
LOC105203095	whole_body_queen	8.40426634965439	12.3065643321393	11.9563670283624	Queen3	north_america	24.2629313605017	-0.0384768823737496	no
LOC105203095	whole_body_queen	8.40426634965439	5.16982878922272	5.42467407126264	Queen2	north_america	10.5945028604854	0.05839281151205	no
LOC105203095	whole_body_queen	8.40426634965439	1.95991726137363	0.979958630686813	Queen1	north_america	2.93987589206044	-0.58008656182687	no
LOC105203095	whole_body_queen	8.40426634965439	1.0785897038817	2.11729570267697	Queen5	north_america	3.19588540655867	0.584690003221407	no
LOC105203095	whole_body_queen	8.40426634965439	4.76890572708621	8.59251714233157	Queen4	north_america	13.3614228694178	0.73361175029678	no
LOC105203095	whole_body_queen	8.40426634965439	4.18514425676438	2.02888558205905	Queen6	north_america	6.21402983882342	-0.775597046550775	no
LOC105203096	whole_body_queen	6.43720456643714	2.09257212838219	3.04332837308857	Queen6	north_america	5.13590050147076	0.386736131045963	no
LOC105203096	whole_body_queen	6.43720456643714	0	1.95991726137363	Queen1	north_america	1.95991726137363	1.56555684873454	no
LOC105203096	whole_body_queen	6.43720456643714	1.90756229083448	3.81889650770292	Queen4	north_america	5.7264587985374	0.728892717649147	no
LOC105203096	whole_body_queen	6.43720456643714	1.72327626307424	5.42467407126264	Queen2	north_america	7.14795033433688	1.23827992294554	no
LOC105203096	whole_body_queen	6.43720456643714	4.31435881552679	5.29323925669242	Queen5	north_america	9.60759807221921	0.243907153229837	no
LOC105203096	whole_body_queen	6.43720456643714	4.73329397389973	5.9781835141812	Queen3	north_america	10.7114774880809	0.283487283487585	no
LOC105203097	whole_body_queen	48.1768622880241	36.6720499319777	27.5248441348006	Queen5	north_america	64.1968940667783	-0.401275536580511	no
LOC105203097	whole_body_queen	48.1768622880241	0.979958630686813	0.979958630686813	Queen1	north_america	1.95991726137363	0	no
LOC105203097	whole_body_queen	48.1768622880241	25.8491439461136	18.9863592494193	Queen2	north_america	44.8355031955329	-0.42586039814847	no
LOC105203097	whole_body_queen	48.1768622880241	36.2436835258552	26.7322755539205	Queen4	north_america	62.9759590797756	-0.425429766714202	no
LOC105203097	whole_body_queen	48.1768622880241	26.1571516047774	25.3610697757381	Queen6	north_america	51.5182213805154	-0.0429232510443014	no
LOC105203097	whole_body_queen	48.1768622880241	12.3065643321393	9.963639190302	Queen3	north_america	22.2702035224413	-0.27941136946131	no
LOC105204968	whole_body_queen	1.92529250232231	1.90756229083448	0	Queen4	north_america	1.90756229083448	-1.53981009994109	no
LOC105204968	whole_body_queen	1.92529250232231	0	0.979958630686813	Queen1	north_america	0.979958630686813	0.985470286907668	no
LOC105204968	whole_body_queen	1.92529250232231	1.72327626307424	0	Queen2	north_america	1.72327626307424	-1.44534334417031	no
LOC105204968	whole_body_queen	1.92529250232231	0.946658794779946	0.996363919030199	Queen3	north_america	1.94302271381015	0.0363747004306876	no
LOC105204968	whole_body_queen	1.92529250232231	1.0785897038817	2.11729570267697	Queen5	north_america	3.19588540655867	0.584690003221407	no
LOC105204968	whole_body_queen	1.92529250232231	1.04628606419109	1.01444279102952	Queen6	north_america	2.06072885522062	-0.0226270089030178	no
LOC105204969	whole_body_queen	9.37788066581295	0	9.79958630686813	Queen1	north_america	9.79958630686813	3.4329041439001	na
LOC105204969	whole_body_queen	9.37788066581295	1.04628606419109	3.04332837308857	Queen6	north_america	4.08961443727966	0.982535531471878	na
LOC105204969	whole_body_queen	9.37788066581295	3.81512458166897	7.63779301540584	Queen4	north_america	11.4529175970748	0.843089620746555	na
LOC105204969	whole_body_queen	9.37788066581295	1.72327626307424	7.23289876168353	Queen2	north_america	8.95617502475777	1.59605714149282	na
LOC105204969	whole_body_queen	9.37788066581295	0.946658794779946	4.981819595151	Queen3	north_america	5.92847838993094	1.61958436664348	na
LOC105204969	whole_body_queen	9.37788066581295	2.1571794077634	8.46918281070788	Queen5	north_america	10.6263622184713	1.58460368206128	na
LOC105204975	whole_body_queen	0.967341378806271	0	0.95472412692573	Queen4	north_america	0.95472412692573	0.966965012238482	no
LOC105204975	whole_body_queen	0.967341378806271	0	1.01444279102952	Queen6	north_america	1.01444279102952	1.01038083439196	no
LOC105204975	whole_body_queen	0.967341378806271	0.946658794779946	0	Queen3	north_america	0.946658794779946	-0.961000034434703	no
LOC105204975	whole_body_queen	0.967341378806271	1.0785897038817	0	Queen5	north_america	1.0785897038817	-1.05560501043652	no
LOC105204975	whole_body_queen	0.967341378806271	0.86163813153712	0	Queen2	north_america	0.86163813153712	-0.896572666573614	no
LOC105204975	whole_body_queen	0.967341378806271	0.979958630686813	0	Queen1	north_america	0.979958630686813	-0.985470286907669	no
LOC105206526	whole_body_queen	1.47598272044919	1.90756229083448	0	Queen4	north_america	1.90756229083448	-1.53981009994109	no
LOC105206526	whole_body_queen	1.47598272044919	0	0.979958630686813	Queen1	north_america	0.979958630686813	0.985470286907668	no
LOC105206526	whole_body_queen	1.47598272044919	1.89331758955989	0	Queen3	north_america	1.89331758955989	-1.53272469165171	no
LOC105206526	whole_body_queen	1.47598272044919	0	1.05864785133848	Queen5	north_america	1.05864785133848	1.04169706621221	no
LOC105206526	whole_body_queen	1.47598272044919	0	0.904112345210441	Queen2	north_america	0.904112345210441	0.929118602120862	no
LOC105206526	whole_body_queen	1.47598272044919	0	2.02888558205905	Queen6	north_america	2.02888558205905	1.59878708050576	no
LOC105206540	whole_body_queen	28.8165572423299	14.6480048986753	14.2021990744133	Queen6	north_america	28.8502039730886	-0.0416986951999836	no
LOC105206540	whole_body_queen	28.8165572423299	7.57327035823957	9.963639190302	Queen3	north_america	17.5369095485416	0.354809210802143	no
LOC105206540	whole_body_queen	28.8165572423299	15.679338090989	15.679338090989	Queen1	north_america	31.358676181978	0	no
LOC105206540	whole_body_queen	28.8165572423299	10.785897038817	17.9970134727542	Queen5	north_america	28.7829105115712	0.688711061757998	no
LOC105206540	whole_body_queen	28.8165572423299	12.3991548904241	20.0492066654403	Queen4	north_america	32.4483615558645	0.651623849730583	no
LOC105206540	whole_body_queen	28.8165572423299	5.16982878922272	8.13701110689397	Queen2	north_america	13.3068398961167	0.566491853392433	no
LOC105206549	whole_body_queen	23.9069667026469	8.62871763105359	10.5864785133848	Queen5	north_america	19.2151961444384	0.267026578237293	no
LOC105206549	whole_body_queen	23.9069667026469	16.6592967216758	17.6392553523626	Queen1	north_america	34.2985520740384	0.077916335690885	no
LOC105206549	whole_body_queen	23.9069667026469	11.4453737450069	9.5472412692573	Queen4	north_america	20.9926150142642	-0.238743858574841	no
LOC105206549	whole_body_queen	23.9069667026469	8.51992915301952	11.9563670283624	Queen3	north_america	20.4762961813819	0.444638500334295	no
LOC105206549	whole_body_queen	23.9069667026469	11.2012957099826	16.2740222137879	Queen2	north_america	27.4753179237705	0.501569687850437	no
LOC105206549	whole_body_queen	23.9069667026469	14.6480048986753	12.1733134923543	Queen6	north_america	26.8213183910296	-0.248360453756042	no
LOC105206559	whole_body_queen	1.95146998759189	0.86163813153712	0	Queen2	north_america	0.86163813153712	-0.896572666573614	no
LOC105206559	whole_body_queen	1.95146998759189	9.70730733493528	7.41053495936939	Queen5	north_america	17.1178422943047	-0.348326245526863	no
LOC105206559	whole_body_queen	1.95146998759189	1.04628606419109	1.01444279102952	Queen6	north_america	2.06072885522062	-0.0226270089030178	no
LOC105206559	whole_body_queen	1.95146998759189	0.953781145417242	0.95472412692573	Queen4	north_america	1.90850527234297	0.00069614068680925	no
LOC105206559	whole_body_queen	1.95146998759189	0.979958630686813	0.979958630686813	Queen1	north_america	1.95991726137363	0	no
LOC105206559	whole_body_queen	1.95146998759189	0.946658794779946	0.996363919030199	Queen3	north_america	1.94302271381015	0.0363747004306876	no
LOC105206574	whole_body_queen	21.6960665628545	7.32400244933766	7.10109953720666	Queen6	north_america	14.4251019865443	-0.0391596557595638	no
LOC105206574	whole_body_queen	21.6960665628545	5.16982878922272	16.2740222137879	Queen2	north_america	21.4438510030107	1.48530168927523	no
LOC105206574	whole_body_queen	21.6960665628545	5.67995276867968	11.9563670283624	Queen3	north_america	17.6363197970421	0.955751435415484	no
LOC105206574	whole_body_queen	21.6960665628545	11.7595035682417	14.6993794603022	Queen1	north_america	26.4588830285439	0.299135336213176	no
LOC105206574	whole_body_queen	21.6960665628545	10.4915925995897	11.4566895231088	Queen4	north_america	21.9482821226984	0.116341957755827	no
LOC105206574	whole_body_queen	21.6960665628545	10.785897038817	23.2902527294467	Queen5	north_america	34.0761497682636	1.04331593263828	no
LOC105206598	whole_body_queen	5.47696061863676	4.89979315343406	4.89979315343406	Queen1	north_america	9.79958630686813	0	no
LOC105206598	whole_body_queen	5.47696061863676	1.89331758955989	1.9927278380604	Queen3	north_america	3.88604542762029	0.0487363928863094	no
LOC105206598	whole_body_queen	5.47696061863676	1.90756229083448	2.86417238077719	Queen4	north_america	4.77173467161168	0.410349354311585	no
LOC105206598	whole_body_queen	5.47696061863676	2.58491439461136	1.80822469042088	Queen2	north_america	4.39313908503224	-0.352280296200982	no
LOC105206598	whole_body_queen	5.47696061863676	4.31435881552679	3.17594355401545	Queen5	north_america	7.49030236954225	-0.34779342796155	no
LOC105206598	whole_body_queen	5.47696061863676	3.13885819257328	3.04332837308857	Queen6	north_america	6.18218656566185	-0.0336894443797355	no
LOC105206612	whole_body_queen	4.54643003587093	2.58491439461136	8.13701110689397	Queen2	north_america	10.7219255015053	1.3497836402627	no
LOC105206612	whole_body_queen	4.54643003587093	1.04628606419109	6.08665674617714	Queen6	north_america	7.13294281036823	1.79209732813755	no
LOC105206612	whole_body_queen	4.54643003587093	1.0785897038817	6.35188710803091	Queen5	north_america	7.43047681191261	1.82250960304374	no
LOC105206612	whole_body_queen	4.54643003587093	0.953781145417242	0.95472412692573	Queen4	north_america	1.90850527234297	0.00069614068680925	no
LOC105206612	whole_body_queen	4.54643003587093	0.946658794779946	0.996363919030199	Queen3	north_america	1.94302271381015	0.0363747004306876	no
LOC105206612	whole_body_queen	4.54643003587093	0.979958630686813	0.979958630686813	Queen1	north_america	1.95991726137363	0	no
LOC105206620	whole_body_queen	69.7420252446476	31.474777798769	30.5511720616234	Queen4	north_america	62.0259498603923	-0.041626055017983	no
LOC105206620	whole_body_queen	69.7420252446476	44.9903007602171	30.4332837308857	Queen6	north_america	75.4235844911028	-0.549036638886454	no
LOC105206620	whole_body_queen	69.7420252446476	37.7506396358594	33.8767312428315	Queen5	north_america	71.627370878691	-0.151955291845725	no
LOC105206620	whole_body_queen	69.7420252446476	35.973034201638	31.8836454089664	Queen3	north_america	67.8566796106043	-0.169103201625862	no
LOC105206620	whole_body_queen	69.7420252446476	33.6038871299477	28.9315950467341	Queen2	north_america	62.5354821766818	-0.209264946319273	no
LOC105206620	whole_body_queen	69.7420252446476	33.3185934433516	40.1783038581593	Queen1	north_america	73.4968973015109	0.262893981511824	no
LOC105206630	whole_body_queen	2.50030237364053	2.1571794077634	1.05864785133848	Queen5	north_america	3.21582725910188	-0.616939178390645	no
LOC105206630	whole_body_queen	2.50030237364053	3.78663517911978	0.996363919030199	Queen3	north_america	4.78299909814998	-1.26163711812533	no
LOC105206630	whole_body_queen	2.50030237364053	1.04628606419109	1.01444279102952	Queen6	north_america	2.06072885522062	-0.0226270089030178	no
LOC105206630	whole_body_queen	2.50030237364053	1.95991726137363	0.979958630686813	Queen1	north_america	2.93987589206044	-0.58008656182687	no
LOC105206630	whole_body_queen	2.50030237364053	0.86163813153712	0	Queen2	north_america	0.86163813153712	-0.896572666573614	no
LOC105206630	whole_body_queen	2.50030237364053	1.90756229083448	0	Queen4	north_america	1.90756229083448	-1.53981009994109	no
LOC105206635	whole_body_queen	21.2132530852173	7.8396690454945	11.7595035682417	Queen1	north_america	19.5991726137363	0.529507937833441	no
LOC105206635	whole_body_queen	21.2132530852173	11.3599055373594	16.9381866235134	Queen3	north_america	28.2980921608727	0.53736633792152	no
LOC105206635	whole_body_queen	21.2132530852173	4.18514425676438	6.08665674617714	Queen6	north_america	10.2718010029415	0.450721044375999	no
LOC105206635	whole_body_queen	21.2132530852173	11.4453737450069	16.2303101577374	Queen4	north_america	27.6756839027443	0.469339115013996	no
LOC105206635	whole_body_queen	21.2132530852173	13.7862101045939	9.04112345210441	Queen2	north_america	22.8273335566983	-0.558331624166452	no
LOC105206635	whole_body_queen	21.2132530852173	5.39294851940849	7.41053495936939	Queen5	north_america	12.8034834787779	0.395716090991268	no
LOC105206648	whole_body_queen	1.39096205720636	0.953781145417242	0.95472412692573	Queen4	north_america	1.90850527234297	0.00069614068680925	no
LOC105206648	whole_body_queen	1.39096205720636	1.72327626307424	0	Queen2	north_america	1.72327626307424	-1.44534334417031	no
LOC105206648	whole_body_queen	1.39096205720636	0	1.05864785133848	Queen5	north_america	1.05864785133848	1.04169706621221	no
LOC105206648	whole_body_queen	1.39096205720636	0	0	Queen1	north_america	0	0	no
LOC105206648	whole_body_queen	1.39096205720636	0	0	Queen6	north_america	0	0	no
LOC105206648	whole_body_queen	1.39096205720636	0.946658794779946	1.9927278380604	Queen3	north_america	2.93938663284035	0.620461050103316	no
LOC105206689	whole_body_queen	32.5956352928868	17.2574352621072	12.7037742160618	Queen5	north_america	29.961209478169	-0.413910828191435	no
LOC105206689	whole_body_queen	32.5956352928868	20.8264934851588	17.9345505425436	Queen3	north_america	38.7610440277024	-0.205059198360966	no
LOC105206689	whole_body_queen	32.5956352928868	14.6993794603022	14.6993794603022	Queen1	north_america	29.3987589206044	0	no
LOC105206689	whole_body_queen	32.5956352928868	18.1218417629276	24.822827300069	Queen4	north_america	42.9446690629966	0.433425481257727	no
LOC105206689	whole_body_queen	32.5956352928868	18.9560388938166	16.2740222137879	Queen2	north_america	35.2300611076046	-0.208221336246316	no
LOC105206689	whole_body_queen	32.5956352928868	13.6017188344842	12.1733134923543	Queen6	north_america	25.7750323268385	-0.148519931982971	no
LOC105206701	whole_body_queen	1.00265332305922	0.946658794779946	0	Queen3	north_america	0.946658794779946	-0.961000034434703	no
LOC105206701	whole_body_queen	1.00265332305922	0	0	Queen4	north_america	0	0	no
LOC105206701	whole_body_queen	1.00265332305922	1.04628606419109	1.01444279102952	Queen6	north_america	2.06072885522062	-0.0226270089030178	no
LOC105206701	whole_body_queen	1.00265332305922	0	1.05864785133848	Queen5	north_america	1.05864785133848	1.04169706621221	no
LOC105206701	whole_body_queen	1.00265332305922	0	0.904112345210441	Queen2	north_america	0.904112345210441	0.929118602120862	no
LOC105206701	whole_body_queen	1.00265332305922	0.979958630686813	0.979958630686813	Queen1	north_america	1.95991726137363	0	no
LOC105206711	whole_body_queen	1.85438659527885	1.95991726137363	0.979958630686813	Queen1	north_america	2.93987589206044	-0.58008656182687	no
LOC105206711	whole_body_queen	1.85438659527885	0.946658794779946	0.996363919030199	Queen3	north_america	1.94302271381015	0.0363747004306876	no
LOC105206711	whole_body_queen	1.85438659527885	0	0.95472412692573	Queen4	north_america	0.95472412692573	0.966965012238482	no
LOC105206711	whole_body_queen	1.85438659527885	0	1.01444279102952	Queen6	north_america	1.01444279102952	1.01038083439196	no
LOC105206711	whole_body_queen	1.85438659527885	1.0785897038817	1.05864785133848	Queen5	north_america	2.13723755522018	-0.0139079442243087	no
LOC105206711	whole_body_queen	1.85438659527885	0.86163813153712	0.904112345210441	Queen2	north_america	1.76575047674756	0.0325459355472472	no
LOC105207370	whole_body_queen	2.53831209403026	5.16982878922272	10.8493481425253	Queen2	north_america	16.019176931748	0.941505334912318	no
LOC105207370	whole_body_queen	2.53831209403026	1.0785897038817	1.05864785133848	Queen5	north_america	2.13723755522018	-0.0139079442243087	no
LOC105207370	whole_body_queen	2.53831209403026	0.979958630686813	0.979958630686813	Queen1	north_america	1.95991726137363	0	no
LOC105207370	whole_body_queen	2.53831209403026	0.946658794779946	1.9927278380604	Queen3	north_america	2.93938663284035	0.620461050103316	no
LOC105207370	whole_body_queen	2.53831209403026	2.86134343625172	3.81889650770292	Queen4	north_america	6.68023994395465	0.319599941180887	no
LOC105207370	whole_body_queen	2.53831209403026	1.04628606419109	1.01444279102952	Queen6	north_america	2.06072885522062	-0.0226270089030178	no
LOC105207387	whole_body_queen	8.19534402645739	2.58491439461136	0.904112345210441	Queen2	north_america	3.4890267398218	-0.912820066612669	no
LOC105207387	whole_body_queen	8.19534402645739	2.83997638433984	4.981819595151	Queen3	north_america	7.82179597949084	0.639486962605856	no
LOC105207387	whole_body_queen	8.19534402645739	5.39294851940849	3.17594355401545	Queen5	north_america	8.56889207342395	-0.614379265061578	no
LOC105207387	whole_body_queen	8.19534402645739	5.23143032095547	5.07221395514762	Queen6	north_america	10.3036442761031	-0.0373407226849389	no
LOC105207387	whole_body_queen	8.19534402645739	3.91983452274725	1.95991726137363	Queen1	north_america	5.87975178412088	-0.733052943003404	no
LOC105207387	whole_body_queen	8.19534402645739	6.67646801792069	6.68306888848011	Queen4	north_america	13.3595369064008	0.00124001704816161	no
LOC105207396	whole_body_queen	14.5113124511228	5.72268687250345	3.81889650770292	Queen4	north_america	9.54158338020637	-0.480335136083497	no
LOC105207396	whole_body_queen	14.5113124511228	9.79958630686813	9.79958630686813	Queen1	north_america	19.5991726137363	0	no
LOC105207396	whole_body_queen	14.5113124511228	7.75474318383408	10.8493481425253	Queen2	north_america	18.6040913263594	0.436670931999285	no
LOC105207396	whole_body_queen	14.5113124511228	9.70730733493528	4.23459140535394	Queen5	north_america	13.9418987402892	-1.03244688317946	no
LOC105207396	whole_body_queen	14.5113124511228	6.62661156345962	7.9709113522416	Queen3	north_america	14.5975229157012	0.234212332882933	no
LOC105207396	whole_body_queen	14.5113124511228	7.32400244933766	7.10109953720666	Queen6	north_america	14.4251019865443	-0.0391596557595638	no
LOC105207402	whole_body_queen	90.0121905644352	37.0504396560962	47.9179542961534	Queen2	north_america	84.9683939522495	0.362450949415532	no
LOC105207402	whole_body_queen	90.0121905644352	44.4929633546575	37.8618289231476	Queen3	north_america	82.354792277805	-0.227289614115663	no
LOC105207402	whole_body_queen	90.0121905644352	49.9778901650274	45.0780970115934	Queen1	north_america	95.0559871766208	-0.145790529543393	no
LOC105207402	whole_body_queen	90.0121905644352	44.2221778591496	57.1669839722782	Queen5	north_america	101.389161831428	0.363170027991238	no
LOC105207402	whole_body_queen	90.0121905644352	38.7125843750705	59.8521246707419	Queen6	north_america	98.5647090458124	0.615711385807518	no
LOC105207402	whole_body_queen	90.0121905644352	35.2899023804379	37.2342409501035	Queen4	north_america	72.5241433305414	0.0752970571038864	no
LOC105207412	whole_body_queen	18.282261534085	14.6480048986753	5.07221395514762	Queen6	north_america	19.7202188538229	-1.36568419675971	no
LOC105207412	whole_body_queen	18.282261534085	11.2012957099826	7.23289876168353	Queen2	north_america	18.4341944716661	-0.567561971365456	no
LOC105207412	whole_body_queen	18.282261534085	9.53781145417242	8.59251714233157	Queen4	north_america	18.130328596504	-0.135593928788036	no
LOC105207412	whole_body_queen	18.282261534085	15.1002558543438	6.35188710803091	Queen5	north_america	21.4521429623747	-1.13089709626004	no
LOC105207412	whole_body_queen	18.282261534085	9.79958630686813	7.8396690454945	Queen1	north_america	17.6392553523626	-0.28891178733337	no
LOC105207412	whole_body_queen	18.282261534085	7.57327035823957	7.9709113522416	Queen3	north_america	15.5441817104812	0.0654089160222752	no
LOC105207423	whole_body_queen	1.42217009031463	0.979958630686813	0.979958630686813	Queen1	north_america	1.95991726137363	0	no
LOC105207423	whole_body_queen	1.42217009031463	0.86163813153712	0.904112345210441	Queen2	north_america	1.76575047674756	0.0325459355472472	no
LOC105207423	whole_body_queen	1.42217009031463	0.946658794779946	0.996363919030199	Queen3	north_america	1.94302271381015	0.0363747004306876	no
LOC105207423	whole_body_queen	1.42217009031463	1.04628606419109	0	Queen6	north_america	1.04628606419109	-1.03300784329498	no
LOC105207423	whole_body_queen	1.42217009031463	1.0785897038817	0	Queen5	north_america	1.0785897038817	-1.05560501043652	no
LOC105207423	whole_body_queen	1.42217009031463	0.953781145417242	0	Queen4	north_america	0.953781145417242	-0.966268871551673	no
LOC105207434	whole_body_queen	3.85199947690736	2.09257212838219	2.02888558205905	Queen6	north_america	4.12145771044124	-0.0300201632151384	no
LOC105207434	whole_body_queen	3.85199947690736	0.979958630686813	2.93987589206044	Queen1	north_america	3.91983452274725	0.992679897918909	no
LOC105207434	whole_body_queen	3.85199947690736	1.89331758955989	1.9927278380604	Queen3	north_america	3.88604542762029	0.0487363928863094	no
LOC105207434	whole_body_queen	3.85199947690736	0.953781145417242	2.86417238077719	Queen4	north_america	3.81795352619443	0.983890582701003	no
LOC105207434	whole_body_queen	3.85199947690736	0.86163813153712	0.904112345210441	Queen2	north_america	1.76575047674756	0.0325459355472472	no
LOC105207434	whole_body_queen	3.85199947690736	2.1571794077634	0	Queen5	north_america	2.1571794077634	-1.65863624460286	no
LOC105207450	whole_body_queen	71.2910305820267	31.2397402277382	36.8654650041174	Queen3	north_america	68.1052052318556	0.232042526358689	no
LOC105207450	whole_body_queen	71.2910305820267	35.2785107047252	39.1983452274725	Queen1	north_america	74.4768559321978	0.148020881842034	no
LOC105207450	whole_body_queen	71.2910305820267	37.9120777876333	43.3973925701012	Queen2	north_america	81.3094703577344	0.190256932591827	no
LOC105207450	whole_body_queen	71.2910305820267	12.5554327702931	13.1877562833838	Queen6	north_america	25.7431890536769	0.0657752797059225	no
LOC105207450	whole_body_queen	71.2910305820267	11.8644867426987	6.35188710803091	Queen5	north_america	18.2163738507296	-0.807207380100691	no
LOC105207450	whole_body_queen	71.2910305820267	38.1512458166897	40.0984133308807	Queen4	north_america	78.2496591475703	0.0700244817736917	no
LOC105207460	whole_body_queen	9.82829109961582	6.85971041480769	6.85971041480769	Queen1	north_america	13.7194208296154	0	no
[truncated: 59 more rows]
