# Supplementary material for: Genomic architecture and evolutionary antagonism drive allelic expression bias in the social supergene of red fire ants
Source: eLife journal article supplement (doi:10.7554/elife.55862), 2020-08-10
Supplement: supp [file elife-55862-supp-v1.zip › elife_poa_e55862_Figure_1_figure_supplement_4_source_data_1.csv]

refseq_id	body_part	median_expression	littleb_expression	bigB_expression	sample_id	population	total_expression	lfc_SB-Sb	significant
LOC105193110	whole_body_queen_taiwan	0.973101132448779	0	1.03199484332629	SBSb-virgin-queens-1	taiwan	1.03199484332629	1.02289674093044	no
LOC105193110	whole_body_queen_taiwan	0.973101132448779	0	0.914207421571271	SBSb-virgin-queens-2	taiwan	0.914207421571271	0.936747167263155	no
LOC105193110	whole_body_queen_taiwan	0.973101132448779	1	1	SBSb-virgin-queens-3	taiwan	2	0	no
LOC105193110	whole_body_queen_taiwan	0.973101132448779	0.911797276362229	0	SBSb-virgin-queens-4	taiwan	0.911797276362229	-0.934929550571406	no
LOC105193112	whole_body_queen_taiwan	131.403503344755	69.3348476697214	61.9196905995772	SBSb-virgin-queens-1	taiwan	131.254538269299	-0.160728078731268	no
LOC105193112	whole_body_queen_taiwan	131.403503344755	70.2083902798916	61.344078140319	SBSb-virgin-queens-4	taiwan	131.552468420211	-0.191794710127139	no
LOC105193112	whole_body_queen_taiwan	131.403503344755	81.747744191266	60.3376898237039	SBSb-virgin-queens-2	taiwan	142.08543401497	-0.431946151699753	no
LOC105193112	whole_body_queen_taiwan	131.403503344755	63	58	SBSb-virgin-queens-3	taiwan	121	-0.117356950638159	no
LOC105193113	whole_body_queen_taiwan	48.9411901439757	29.8673189961877	28.895855613136	SBSb-virgin-queens-1	taiwan	58.7631746093237	-0.046134680930744	no
LOC105193113	whole_body_queen_taiwan	48.9411901439757	25	17	SBSb-virgin-queens-3	taiwan	42	-0.53051471669878	no
LOC105193113	whole_body_queen_taiwan	48.9411901439757	25.5303237381424	17.3960818606875	SBSb-virgin-queens-4	taiwan	42.9264055988299	-0.528243757571268	no
LOC105193113	whole_body_queen_taiwan	48.9411901439757	26.6155446204122	28.3404300687094	SBSb-virgin-queens-2	taiwan	54.9559746891216	0.0874094382039781	no
LOC105193114	whole_body_queen_taiwan	41.0016251920387	24.5338691754399	12.3839381199154	SBSb-virgin-queens-1	taiwan	36.9178072953553	-0.931909487221957	no
LOC105193114	whole_body_queen_taiwan	41.0016251920387	30.4177652804711	21.9409781177105	SBSb-virgin-queens-2	taiwan	52.3587433981816	-0.453653662783751	no
LOC105193114	whole_body_queen_taiwan	41.0016251920387	26	14	SBSb-virgin-queens-3	taiwan	40	-0.84799690655495	no
LOC105193114	whole_body_queen_taiwan	41.0016251920387	27.3539182908669	14.6493320932105	SBSb-virgin-queens-4	taiwan	42.0032503840774	-0.857447033306944	no
LOC105193116	whole_body_queen_taiwan	26.2797992971902	12.3572171451914	10.056281637284	SBSb-virgin-queens-2	taiwan	22.4134987824754	-0.272753195558287	no
LOC105193116	whole_body_queen_taiwan	26.2797992971902	7.46682974904692	8.25595874661029	SBSb-virgin-queens-1	taiwan	15.7227884956572	0.128560554780292	no
LOC105193116	whole_body_queen_taiwan	26.2797992971902	18	23	SBSb-virgin-queens-3	taiwan	41	0.337034987277571	no
LOC105193116	whole_body_queen_taiwan	26.2797992971902	16.4123509745201	13.7337488373849	SBSb-virgin-queens-4	taiwan	30.146099811905	-0.240986450741444	no
LOC105193117	whole_body_queen_taiwan	63.4331649617374	36.267458781085	47.4717627930092	SBSb-virgin-queens-1	taiwan	83.7392215740942	0.379228103609913	no
LOC105193117	whole_body_queen_taiwan	63.4331649617374	28.5166549504416	30.168844911852	SBSb-virgin-queens-2	taiwan	58.6854998622936	0.0785754574308946	no
LOC105193117	whole_body_queen_taiwan	63.4331649617374	33.7364992254025	31.1298306980724	SBSb-virgin-queens-4	taiwan	64.8663299234748	-0.112538986486737	no
LOC105193117	whole_body_queen_taiwan	63.4331649617374	27	35	SBSb-virgin-queens-3	taiwan	62	0.362570079384708	no
LOC105193118	whole_body_queen_taiwan	21.6473044360719	8.53351971319648	12.3839381199154	SBSb-virgin-queens-1	taiwan	20.9174578331119	0.489421829084868	no
LOC105193118	whole_body_queen_taiwan	21.6473044360719	11.4066619801766	10.9704890588553	SBSb-virgin-queens-2	taiwan	22.3771510390319	-0.0516329143759571	no
LOC105193118	whole_body_queen_taiwan	21.6473044360719	10	10	SBSb-virgin-queens-3	taiwan	20	0	no
LOC105193118	whole_body_queen_taiwan	21.6473044360719	14.5887564217957	12.8181655815592	SBSb-virgin-queens-4	taiwan	27.4069220033549	-0.173939738278258	no
LOC105193119	whole_body_queen_taiwan	4.38385696757656	1	2	SBSb-virgin-queens-3	taiwan	3	0.584962500721156	no
LOC105193119	whole_body_queen_taiwan	4.38385696757656	2.13337992829912	2.06398968665257	SBSb-virgin-queens-1	taiwan	4.19736961495169	-0.0323082686642103	no
LOC105193119	whole_body_queen_taiwan	4.38385696757656	1.90111033002944	3.65682968628509	SBSb-virgin-queens-2	taiwan	5.55794001631453	0.682742956926329	no
LOC105193119	whole_body_queen_taiwan	4.38385696757656	1.82359455272446	2.74674976747697	SBSb-virgin-queens-4	taiwan	4.57034432020143	0.408106685094492	no
LOC105193120	whole_body_queen_taiwan	3.92795832939545	1.90111033002944	3.65682968628509	SBSb-virgin-queens-2	taiwan	5.55794001631453	0.682742956926329	no
LOC105193120	whole_body_queen_taiwan	3.92795832939545	1	2	SBSb-virgin-queens-3	taiwan	3	0.584962500721156	no
LOC105193120	whole_body_queen_taiwan	3.92795832939545	2.13337992829912	2.06398968665257	SBSb-virgin-queens-1	taiwan	4.19736961495169	-0.0323082686642103	no
LOC105193120	whole_body_queen_taiwan	3.92795832939545	0.911797276362229	2.74674976747697	SBSb-virgin-queens-4	taiwan	3.6585470438392	0.97071007767607	no
LOC105193121	whole_body_queen_taiwan	2.432381293293	2.13337992829912	1.03199484332629	SBSb-virgin-queens-1	taiwan	3.16537477162541	-0.624822968913018	no
LOC105193121	whole_body_queen_taiwan	2.432381293293	0.95055516501472	0.914207421571271	SBSb-virgin-queens-2	taiwan	1.86476258658599	-0.0271376335436875	no
LOC105193121	whole_body_queen_taiwan	2.432381293293	2	1	SBSb-virgin-queens-3	taiwan	3	-0.584962500721156	no
LOC105193121	whole_body_queen_taiwan	2.432381293293	1.82359455272446	0	SBSb-virgin-queens-4	taiwan	1.82359455272446	-1.49753294315298	no
LOC105193122	whole_body_queen_taiwan	10.1735317924158	1.82359455272446	4.57791627912829	SBSb-virgin-queens-4	taiwan	6.40151083185274	0.982193337467655	no
LOC105193122	whole_body_queen_taiwan	10.1735317924158	7.60444132011776	2.74262226471381	SBSb-virgin-queens-2	taiwan	10.3470635848316	-1.20103207490962	no
LOC105193122	whole_body_queen_taiwan	10.1735317924158	6	4	SBSb-virgin-queens-3	taiwan	10	-0.485426827170242	no
LOC105193122	whole_body_queen_taiwan	10.1735317924158	13.8669695339443	11.3519432765892	SBSb-virgin-queens-1	taiwan	25.2189128105334	-0.267372567558106	no
LOC105193123	whole_body_queen_taiwan	4.11468222913899	0	3	SBSb-virgin-queens-3	taiwan	3	2	no
LOC105193123	whole_body_queen_taiwan	4.11468222913899	0	6.4090827907796	SBSb-virgin-queens-4	taiwan	6.4090827907796	2.88929495479878	no
LOC105193123	whole_body_queen_taiwan	4.11468222913899	0.95055516501472	0.914207421571271	SBSb-virgin-queens-2	taiwan	1.86476258658599	-0.0271376335436875	no
LOC105193123	whole_body_queen_taiwan	4.11468222913899	2.13337992829912	3.09598452997886	SBSb-virgin-queens-1	taiwan	5.22936445827798	0.386490556626067	no
LOC105193124	whole_body_queen_taiwan	43.4048007537635	40.873872095633	37.4825042844221	SBSb-virgin-queens-2	taiwan	78.3563763800551	-0.121847644028795	no
LOC105193124	whole_body_queen_taiwan	43.4048007537635	10	14	SBSb-virgin-queens-3	taiwan	24	0.447458976971221	no
LOC105193124	whole_body_queen_taiwan	43.4048007537635	25.5303237381424	25.6363311631184	SBSb-virgin-queens-4	taiwan	51.1666549012608	0.00575310179893713	no
LOC105193124	whole_body_queen_taiwan	43.4048007537635	17.067039426393	18.5759071798732	SBSb-virgin-queens-1	taiwan	35.6429466062661	0.115719049042089	no
LOC105193126	whole_body_queen_taiwan	0.97527758250736	0	0.915583255825657	SBSb-virgin-queens-4	taiwan	0.915583255825657	0.937783730098295	no
LOC105193126	whole_body_queen_taiwan	0.97527758250736	0.95055516501472	0	SBSb-virgin-queens-2	taiwan	0.95055516501472	-0.963884800806843	no
LOC105193126	whole_body_queen_taiwan	0.97527758250736	2.13337992829912	1.03199484332629	SBSb-virgin-queens-1	taiwan	3.16537477162541	-0.624822968913018	no
LOC105193126	whole_body_queen_taiwan	0.97527758250736	0	1	SBSb-virgin-queens-3	taiwan	1	1	no
LOC105193128	whole_body_queen_taiwan	5.99721137867817	1.82359455272446	3.66233302330263	SBSb-virgin-queens-4	taiwan	5.48592757602709	0.723519114490083	no
LOC105193128	whole_body_queen_taiwan	5.99721137867817	2.13337992829912	0	SBSb-virgin-queens-1	taiwan	2.13337992829912	-1.64771970984345	no
LOC105193128	whole_body_queen_taiwan	5.99721137867817	4	8	SBSb-virgin-queens-3	taiwan	12	0.84799690655495	no
LOC105193128	whole_body_queen_taiwan	5.99721137867817	2.85166549504416	3.65682968628509	SBSb-virgin-queens-2	taiwan	6.50849518132925	0.273865704473311	no
LOC105193129	whole_body_queen_taiwan	13.8687529457825	9.11797276362229	5.49349953495394	SBSb-virgin-queens-4	taiwan	14.6114722985762	-0.639852157637482	no
LOC105193129	whole_body_queen_taiwan	13.8687529457825	9	10	SBSb-virgin-queens-3	taiwan	19	0.137503523749935	no
LOC105193129	whole_body_queen_taiwan	13.8687529457825	0	1.03199484332629	SBSb-virgin-queens-1	taiwan	1.03199484332629	1.02289674093044	no
LOC105193129	whole_body_queen_taiwan	13.8687529457825	8.55499648513248	4.57103710785636	SBSb-virgin-queens-2	taiwan	13.1260335929888	-0.778309416892748	no
LOC105193130	whole_body_queen_taiwan	3.03199484332629	2.85166549504416	1.82841484314254	SBSb-virgin-queens-2	taiwan	4.6800803381867	-0.445488679612038	no
LOC105193130	whole_body_queen_taiwan	3.03199484332629	0	2.06398968665257	SBSb-virgin-queens-1	taiwan	2.06398968665257	1.61541144117924	no
LOC105193130	whole_body_queen_taiwan	3.03199484332629	0	1.83116651165131	SBSb-virgin-queens-4	taiwan	1.83116651165131	1.50139660211161	no
LOC105193130	whole_body_queen_taiwan	3.03199484332629	2	2	SBSb-virgin-queens-3	taiwan	4	0	no
LOC105193131	whole_body_queen_taiwan	1.432381293293	0.95055516501472	0.914207421571271	SBSb-virgin-queens-2	taiwan	1.86476258658599	-0.0271376335436875	no
LOC105193131	whole_body_queen_taiwan	1.432381293293	0	0.915583255825657	SBSb-virgin-queens-4	taiwan	0.915583255825657	0.937783730098295	no
LOC105193131	whole_body_queen_taiwan	1.432381293293	0	1	SBSb-virgin-queens-3	taiwan	1	1	no
LOC105193131	whole_body_queen_taiwan	1.432381293293	1.06668996414956	1.03199484332629	SBSb-virgin-queens-1	taiwan	2.09868480747585	-0.0244252372222371	no
LOC105193132	whole_body_queen_taiwan	32.7353829292551	16.4123509745201	21.0584148839901	SBSb-virgin-queens-4	taiwan	37.4707658585102	0.341218117279943	no
LOC105193132	whole_body_queen_taiwan	32.7353829292551	20.2671093188416	17.5439123365469	SBSb-virgin-queens-1	taiwan	37.8110216553885	-0.197678300381134	no
LOC105193132	whole_body_queen_taiwan	32.7353829292551	15.2088826402355	6.3994519509989	SBSb-virgin-queens-2	taiwan	21.6083345912344	-1.13129431713368	no
LOC105193132	whole_body_queen_taiwan	32.7353829292551	12	16	SBSb-virgin-queens-3	taiwan	28	0.387023123109247	no
LOC105193134	whole_body_queen_taiwan	2.84658871486427	0.95055516501472	2.74262226471381	SBSb-virgin-queens-2	taiwan	3.69317742972853	0.940164646489563	no
LOC105193134	whole_body_queen_taiwan	2.84658871486427	1	1	SBSb-virgin-queens-3	taiwan	2	0	no
LOC105193134	whole_body_queen_taiwan	2.84658871486427	6.40013978489736	6.19196905995772	SBSb-virgin-queens-1	taiwan	12.5921088448551	-0.0411657084252941	no
LOC105193134	whole_body_queen_taiwan	2.84658871486427	0.911797276362229	0.915583255825657	SBSb-virgin-queens-4	taiwan	1.82738053218789	0.002854179526889	no
LOC105193135	whole_body_queen_taiwan	11.1723981387402	1.82359455272446	3.66233302330263	SBSb-virgin-queens-4	taiwan	5.48592757602709	0.723519114490083	no
LOC105193135	whole_body_queen_taiwan	11.1723981387402	2	2	SBSb-virgin-queens-3	taiwan	4	0	no
LOC105193135	whole_body_queen_taiwan	11.1723981387402	10.6668996414956	6.19196905995772	SBSb-virgin-queens-1	taiwan	16.8588687014533	-0.697962511151223	no
LOC105193135	whole_body_queen_taiwan	11.1723981387402	12.3572171451914	7.31365937257017	SBSb-virgin-queens-2	taiwan	19.6708765177615	-0.684063922563374	no
LOC105193137	whole_body_queen_taiwan	2.49772111869406	0.911797276362229	0.915583255825657	SBSb-virgin-queens-4	taiwan	1.82738053218789	0.002854179526889	no
LOC105193137	whole_body_queen_taiwan	2.49772111869406	0.95055516501472	0.914207421571271	SBSb-virgin-queens-2	taiwan	1.86476258658599	-0.0271376335436875	no
LOC105193137	whole_body_queen_taiwan	2.49772111869406	2	3	SBSb-virgin-queens-3	taiwan	5	0.415037499278844	no
LOC105193137	whole_body_queen_taiwan	2.49772111869406	1.06668996414956	2.06398968665257	SBSb-virgin-queens-1	taiwan	3.13067965080213	0.568089463026571	no
LOC105193139	whole_body_queen_taiwan	0.97527758250736	0.95055516501472	0	SBSb-virgin-queens-2	taiwan	0.95055516501472	-0.963884800806843	no
LOC105193139	whole_body_queen_taiwan	0.97527758250736	0	1.03199484332629	SBSb-virgin-queens-1	taiwan	1.03199484332629	1.02289674093044	no
LOC105193139	whole_body_queen_taiwan	0.97527758250736	1	0	SBSb-virgin-queens-3	taiwan	1	-1	no
LOC105193139	whole_body_queen_taiwan	0.97527758250736	0	0	SBSb-virgin-queens-4	taiwan	0	0	no
LOC105193142	whole_body_queen_taiwan	0.97527758250736	0	1.03199484332629	SBSb-virgin-queens-1	taiwan	1.03199484332629	1.02289674093044	no
LOC105193142	whole_body_queen_taiwan	0.97527758250736	0	0	SBSb-virgin-queens-4	taiwan	0	0	no
LOC105193142	whole_body_queen_taiwan	0.97527758250736	0.95055516501472	0	SBSb-virgin-queens-2	taiwan	0.95055516501472	-0.963884800806843	no
LOC105193142	whole_body_queen_taiwan	0.97527758250736	1	0	SBSb-virgin-queens-3	taiwan	1	-1	no
LOC105193144	whole_body_queen_taiwan	7.63202978955063	3.20006989244868	2.06398968665257	SBSb-virgin-queens-1	taiwan	5.26405957910125	-0.455001894485993	no
LOC105193144	whole_body_queen_taiwan	7.63202978955063	3.64718910544892	15.5649153490362	SBSb-virgin-queens-4	taiwan	19.2121044544851	1.83370057296375	no
LOC105193144	whole_body_queen_taiwan	7.63202978955063	3	7	SBSb-virgin-queens-3	taiwan	10	1	no
LOC105193144	whole_body_queen_taiwan	7.63202978955063	0	1.82841484314254	SBSb-virgin-queens-2	taiwan	1.82841484314254	1.49999373551223	no
LOC105193145	whole_body_queen_taiwan	46.3017982155926	18	17	SBSb-virgin-queens-3	taiwan	35	-0.0780025120012732	no
LOC105193145	whole_body_queen_taiwan	46.3017982155926	29.8673189961877	13.4159329632417	SBSb-virgin-queens-1	taiwan	43.2832519594294	-1.09841597456957	no
LOC105193145	whole_body_queen_taiwan	46.3017982155926	36.1210962705594	20.112563274568	SBSb-virgin-queens-2	taiwan	56.2336595451273	-0.814137570361672	no
LOC105193145	whole_body_queen_taiwan	46.3017982155926	29.1775128435913	20.1428316281645	SBSb-virgin-queens-4	taiwan	49.3203444717558	-0.513305299713016	no
LOC105193214	whole_body_queen_taiwan	137.446421134726	113.069136199853	58.8237060695983	SBSb-virgin-queens-1	taiwan	171.892842269452	-0.931119299908057	no
LOC105193214	whole_body_queen_taiwan	137.446421134726	52	51	SBSb-virgin-queens-3	taiwan	103	-0.027480736422107	no
LOC105193214	whole_body_queen_taiwan	137.446421134726	2.85166549504416	1.82841484314254	SBSb-virgin-queens-2	taiwan	4.6800803381867	-0.445488679612038	no
LOC105193214	whole_body_queen_taiwan	137.446421134726	116.710051374365	91.5583255825657	SBSb-virgin-queens-4	taiwan	208.268376956931	-0.34680284789287	no
LOC105193215	whole_body_queen_taiwan	1.932381293293	1.06668996414956	1.03199484332629	SBSb-virgin-queens-1	taiwan	2.09868480747585	-0.0244252372222371	no
LOC105193215	whole_body_queen_taiwan	1.932381293293	1	1	SBSb-virgin-queens-3	taiwan	2	0	no
LOC105193215	whole_body_queen_taiwan	1.932381293293	0.95055516501472	0.914207421571271	SBSb-virgin-queens-2	taiwan	1.86476258658599	-0.0271376335436875	no
LOC105193215	whole_body_queen_taiwan	1.932381293293	0.911797276362229	0.915583255825657	SBSb-virgin-queens-4	taiwan	1.82738053218789	0.002854179526889	no
LOC105193216	whole_body_queen_taiwan	2.04934240373792	1.06668996414956	1.03199484332629	SBSb-virgin-queens-1	taiwan	2.09868480747585	-0.0244252372222371	no
LOC105193216	whole_body_queen_taiwan	2.04934240373792	1	1	SBSb-virgin-queens-3	taiwan	2	0	no
LOC105193216	whole_body_queen_taiwan	2.04934240373792	0	0.915583255825657	SBSb-virgin-queens-4	taiwan	0.915583255825657	0.937783730098295	no
LOC105193216	whole_body_queen_taiwan	2.04934240373792	1.90111033002944	0.914207421571271	SBSb-virgin-queens-2	taiwan	2.81531775160071	-0.59985799540809	no
LOC105193217	whole_body_queen_taiwan	19.6885759816852	6.40013978489736	17.5439123365469	SBSb-virgin-queens-1	taiwan	23.9440521214442	1.32532122346618	taiwan
LOC105193217	whole_body_queen_taiwan	19.6885759816852	4.55898638181115	12.8181655815592	SBSb-virgin-queens-4	taiwan	17.3771519633703	1.31367235177917	taiwan
LOC105193217	whole_body_queen_taiwan	19.6885759816852	5	17	SBSb-virgin-queens-3	taiwan	22	1.58496250072116	taiwan
LOC105193217	whole_body_queen_taiwan	19.6885759816852	1.90111033002944	13.7131113235691	SBSb-virgin-queens-2	taiwan	15.6142216535985	2.34242529209556	taiwan
LOC105193218	whole_body_queen_taiwan	8.80667917876008	3.80222066005888	3.65682968628509	SBSb-virgin-queens-2	taiwan	7.45905034634397	-0.0443535767359868	no
LOC105193218	whole_body_queen_taiwan	8.80667917876008	4.55898638181115	3.66233302330263	SBSb-virgin-queens-4	taiwan	8.22131940511377	-0.253769790189339	no
LOC105193218	whole_body_queen_taiwan	8.80667917876008	3.20006989244868	6.19196905995772	SBSb-virgin-queens-1	taiwan	9.3920389524064	0.775973478688016	no
LOC105193218	whole_body_queen_taiwan	8.80667917876008	5	6	SBSb-virgin-queens-3	taiwan	11	0.222392421336448	no
LOC105193219	whole_body_queen_taiwan	152.4552256345	38.4008387093841	22.7038865531783	SBSb-virgin-queens-1	taiwan	61.1047252625624	-0.733102713373494	no
LOC105193219	whole_body_queen_taiwan	152.4552256345	87.4510751813543	62.1661046668465	SBSb-virgin-queens-2	taiwan	149.617179848201	-0.485729073224338	no
LOC105193219	whole_body_queen_taiwan	152.4552256345	85.7089439780495	69.58432744275	SBSb-virgin-queens-4	taiwan	155.293271420799	-0.296832931513549	no
LOC105193219	whole_body_queen_taiwan	152.4552256345	86	74	SBSb-virgin-queens-3	taiwan	160	-0.214124805352848	no
LOC105193220	whole_body_queen_taiwan	547.738107223995	335.5413977013	195.934816746691	SBSb-virgin-queens-4	taiwan	531.476214447991	-0.773065788034389	no
LOC105193220	whole_body_queen_taiwan	547.738107223995	384.024286665947	305.345278804805	SBSb-virgin-queens-2	taiwan	689.369565470752	-0.329790833781067	no
LOC105193220	whole_body_queen_taiwan	547.738107223995	118.402586020601	86.6875668394081	SBSb-virgin-queens-1	taiwan	205.090152860009	-0.445389879290293	no
LOC105193220	whole_body_queen_taiwan	547.738107223995	324	240	SBSb-virgin-queens-3	taiwan	564	-0.431406571685855	no
LOC105193222	whole_body_queen_taiwan	6.93654742350181	3.64718910544892	1.83116651165131	SBSb-virgin-queens-4	taiwan	5.47835561710023	-0.714961750708274	no
LOC105193222	whole_body_queen_taiwan	6.93654742350181	4.7527758250736	3.65682968628509	SBSb-virgin-queens-2	taiwan	8.40960551135869	-0.304910132589468	no
LOC105193222	whole_body_queen_taiwan	6.93654742350181	1	2	SBSb-virgin-queens-3	taiwan	3	0.584962500721156	no
LOC105193222	whole_body_queen_taiwan	6.93654742350181	4.26675985659824	4.12797937330515	SBSb-virgin-queens-1	taiwan	8.39473922990338	-0.0385252209114001	no
LOC105193223	whole_body_queen_taiwan	7.19507644673123	0	2.74262226471381	SBSb-virgin-queens-2	taiwan	2.74262226471381	1.90404944729641	no
LOC105193223	whole_body_queen_taiwan	7.19507644673123	6	2	SBSb-virgin-queens-3	taiwan	8	-1.22239242133645	no
LOC105193223	whole_body_queen_taiwan	7.19507644673123	4.26675985659824	4.12797937330515	SBSb-virgin-queens-1	taiwan	8.39473922990338	-0.0385252209114001	no
LOC105193223	whole_body_queen_taiwan	7.19507644673123	4.55898638181115	1.83116651165131	SBSb-virgin-queens-4	taiwan	6.39015289346246	-0.973425245720793	no
LOC105193224	whole_body_queen_taiwan	8.74671201868961	0.95055516501472	2.74262226471381	SBSb-virgin-queens-2	taiwan	3.69317742972853	0.940164646489563	no
LOC105193224	whole_body_queen_taiwan	8.74671201868961	5	2	SBSb-virgin-queens-3	taiwan	7	-1	no
LOC105193224	whole_body_queen_taiwan	8.74671201868961	5.47078365817337	5.49349953495394	SBSb-virgin-queens-4	taiwan	10.9642831931273	0.00505575446497445	no
LOC105193224	whole_body_queen_taiwan	8.74671201868961	5.3334498207478	5.15997421663143	SBSb-virgin-queens-1	taiwan	10.4934240373792	-0.0400672352609365	no
LOC105193225	whole_body_queen_taiwan	0.97527758250736	0.95055516501472	0	SBSb-virgin-queens-2	taiwan	0.95055516501472	-0.963884800806843	no
LOC105193225	whole_body_queen_taiwan	0.97527758250736	1.06668996414956	0	SBSb-virgin-queens-1	taiwan	1.06668996414956	-1.04732197815267	no
LOC105193225	whole_body_queen_taiwan	0.97527758250736	1	0	SBSb-virgin-queens-3	taiwan	1	-1	no
LOC105193225	whole_body_queen_taiwan	0.97527758250736	0.911797276362229	0	SBSb-virgin-queens-4	taiwan	0.911797276362229	-0.934929550571406	no
LOC105193226	whole_body_queen_taiwan	0.957791627912829	0	0.915583255825657	SBSb-virgin-queens-4	taiwan	0.915583255825657	0.937783730098295	no
LOC105193226	whole_body_queen_taiwan	0.957791627912829	0	0.914207421571271	SBSb-virgin-queens-2	taiwan	0.914207421571271	0.936747167263155	no
LOC105193226	whole_body_queen_taiwan	0.957791627912829	0	1.03199484332629	SBSb-virgin-queens-1	taiwan	1.03199484332629	1.02289674093044	no
LOC105193226	whole_body_queen_taiwan	0.957791627912829	1	0	SBSb-virgin-queens-3	taiwan	1	-1	no
LOC105193227	whole_body_queen_taiwan	1.91369026609394	1	1	SBSb-virgin-queens-3	taiwan	2	0	no
LOC105193227	whole_body_queen_taiwan	1.91369026609394	0.911797276362229	0.915583255825657	SBSb-virgin-queens-4	taiwan	1.82738053218789	0.002854179526889	no
LOC105193227	whole_body_queen_taiwan	1.91369026609394	1.06668996414956	1.03199484332629	SBSb-virgin-queens-1	taiwan	2.09868480747585	-0.0244252372222371	no
LOC105193227	whole_body_queen_taiwan	1.91369026609394	0	0.914207421571271	SBSb-virgin-queens-2	taiwan	0.914207421571271	0.936747167263155	no
LOC105193228	whole_body_queen_taiwan	17.1631386885342	5.47078365817337	10.0714158140822	SBSb-virgin-queens-4	taiwan	15.5421994722556	0.774827377347447	no
LOC105193228	whole_body_queen_taiwan	17.1631386885342	4	8	SBSb-virgin-queens-3	taiwan	12	0.84799690655495	no
LOC105193228	whole_body_queen_taiwan	17.1631386885342	6.40013978489736	12.3839381199154	SBSb-virgin-queens-1	taiwan	18.7840779048128	0.854878252372262	no
LOC105193228	whole_body_queen_taiwan	17.1631386885342	7.60444132011776	18.2841484314254	SBSb-virgin-queens-2	taiwan	25.8885897515432	1.16426201209448	no
LOC105193229	whole_body_queen_taiwan	24.4567112342005	14	13	SBSb-virgin-queens-3	taiwan	27	-0.0995356735509144	no
LOC105193229	whole_body_queen_taiwan	24.4567112342005	14.5887564217957	7.32466604660526	SBSb-virgin-queens-4	taiwan	21.9134224684009	-0.905041539888544	no
LOC105193229	whole_body_queen_taiwan	24.4567112342005	17.109992970265	10.9704890588553	SBSb-virgin-queens-2	taiwan	28.0804820291202	-0.597303890942206	no
LOC105193229	whole_body_queen_taiwan	24.4567112342005	10.6668996414956	7.22396390328401	SBSb-virgin-queens-1	taiwan	17.8908635447796	-0.504515393252287	no
LOC105193230	whole_body_queen_taiwan	14.297404561176	3.80222066005888	3.65682968628509	SBSb-virgin-queens-2	taiwan	7.45905034634397	-0.0443535767359868	no
LOC105193230	whole_body_queen_taiwan	14.297404561176	10	7	SBSb-virgin-queens-3	taiwan	17	-0.459431618637297	no
LOC105193230	whole_body_queen_taiwan	14.297404561176	7.46682974904692	4.12797937330515	SBSb-virgin-queens-1	taiwan	11.5948091223521	-0.723431420755923	no
LOC105193230	whole_body_queen_taiwan	14.297404561176	12.7651618690712	7.32466604660526	SBSb-virgin-queens-4	taiwan	20.0898279156765	-0.725557272045349	no
LOC105193231	whole_body_queen_taiwan	60.6723075679303	29.8673189961877	33.0238349864412	SBSb-virgin-queens-1	taiwan	62.8911539826288	0.140465581058755	no
LOC105193231	whole_body_queen_taiwan	60.6723075679303	34.6482965017647	23.8051646514671	SBSb-virgin-queens-4	taiwan	58.4534611532318	-0.523192603768751	no
LOC105193231	whole_body_queen_taiwan	60.6723075679303	26	26	SBSb-virgin-queens-3	taiwan	52	0	no
LOC105193231	whole_body_queen_taiwan	60.6723075679303	34.2199859405299	29.2546374902807	SBSb-virgin-queens-2	taiwan	63.4746234308106	-0.219238034791796	no
LOC105193233	whole_body_queen_taiwan	0.957791627912829	0	0.915583255825657	SBSb-virgin-queens-4	taiwan	0.915583255825657	0.937783730098295	no
LOC105193233	whole_body_queen_taiwan	0.957791627912829	2.13337992829912	0	SBSb-virgin-queens-1	taiwan	2.13337992829912	-1.64771970984345	no
LOC105193233	whole_body_queen_taiwan	0.957791627912829	0	0.914207421571271	SBSb-virgin-queens-2	taiwan	0.914207421571271	0.936747167263155	no
LOC105193233	whole_body_queen_taiwan	0.957791627912829	0	1	SBSb-virgin-queens-3	taiwan	1	1	no
LOC105193804	whole_body_queen_taiwan	6.22952517317198	1.06668996414956	3.09598452997886	SBSb-virgin-queens-1	taiwan	4.16267449412842	0.986888288316849	no
LOC105193804	whole_body_queen_taiwan	6.22952517317198	2.73539182908669	5.49349953495394	SBSb-virgin-queens-4	taiwan	8.22889136404063	0.797736613507932	no
LOC105193804	whole_body_queen_taiwan	6.22952517317198	3.80222066005888	3.65682968628509	SBSb-virgin-queens-2	taiwan	7.45905034634397	-0.0443535767359868	no
LOC105193804	whole_body_queen_taiwan	6.22952517317198	1	4	SBSb-virgin-queens-3	taiwan	5	1.32192809488736	no
LOC105193806	whole_body_queen_taiwan	1.51599742166314	1.82359455272446	0.915583255825657	SBSb-virgin-queens-4	taiwan	2.73917780855012	-0.559749213054689	no
LOC105193806	whole_body_queen_taiwan	1.51599742166314	0.95055516501472	0	SBSb-virgin-queens-2	taiwan	0.95055516501472	-0.963884800806843	no
LOC105193806	whole_body_queen_taiwan	1.51599742166314	0	1.03199484332629	SBSb-virgin-queens-1	taiwan	1.03199484332629	1.02289674093044	no
LOC105193806	whole_body_queen_taiwan	1.51599742166314	1	1	SBSb-virgin-queens-3	taiwan	2	0	no
LOC105193807	whole_body_queen_taiwan	2.36958890427506	0.95055516501472	0.914207421571271	SBSb-virgin-queens-2	taiwan	1.86476258658599	-0.0271376335436875	no
LOC105193807	whole_body_queen_taiwan	2.36958890427506	1.82359455272446	0.915583255825657	SBSb-virgin-queens-4	taiwan	2.73917780855012	-0.559749213054689	no
LOC105193807	whole_body_queen_taiwan	2.36958890427506	1	1	SBSb-virgin-queens-3	taiwan	2	0	no
LOC105193807	whole_body_queen_taiwan	2.36958890427506	4.26675985659824	0	SBSb-virgin-queens-1	taiwan	4.26675985659824	-2.39691567980834	no
LOC105193808	whole_body_queen_taiwan	4.82738053218789	4.7527758250736	5.48524452942763	SBSb-virgin-queens-2	taiwan	10.2380203545012	0.172902720862269	no
LOC105193808	whole_body_queen_taiwan	4.82738053218789	3	3	SBSb-virgin-queens-3	taiwan	6	0	no
LOC105193808	whole_body_queen_taiwan	4.82738053218789	1.06668996414956	2.06398968665257	SBSb-virgin-queens-1	taiwan	3.13067965080213	0.568089463026571	no
LOC105193808	whole_body_queen_taiwan	4.82738053218789	1.82359455272446	1.83116651165131	SBSb-virgin-queens-4	taiwan	3.65476106437577	0.00386365895862898	no
LOC105193811	whole_body_queen_taiwan	1.86235244137695	1.90111033002944	0	SBSb-virgin-queens-2	taiwan	1.90111033002944	-1.53660516267125	no
LOC105193811	whole_body_queen_taiwan	1.86235244137695	1	0	SBSb-virgin-queens-3	taiwan	1	-1	no
LOC105193811	whole_body_queen_taiwan	1.86235244137695	1.82359455272446	0	SBSb-virgin-queens-4	taiwan	1.82359455272446	-1.49753294315298	no
LOC105193811	whole_body_queen_taiwan	1.86235244137695	2.13337992829912	0	SBSb-virgin-queens-1	taiwan	2.13337992829912	-1.64771970984345	no
LOC105193812	whole_body_queen_taiwan	13.6667143440931	6	10	SBSb-virgin-queens-3	taiwan	16	0.652076696579693	no
LOC105193812	whole_body_queen_taiwan	13.6667143440931	5.70333099008832	9.14207421571271	SBSb-virgin-queens-2	taiwan	14.845405205801	0.597402660023506	no
LOC105193812	whole_body_queen_taiwan	13.6667143440931	3.20006989244868	9.28795358993658	SBSb-virgin-queens-1	taiwan	12.4880234823853	1.29247079886305	no
LOC105193812	whole_body_queen_taiwan	13.6667143440931	2.73539182908669	5.49349953495394	SBSb-virgin-queens-4	taiwan	8.22889136404063	0.797736613507932	no
LOC105193814	whole_body_queen_taiwan	93.3284693305417	78.9350573470674	76.3676184061452	SBSb-virgin-queens-1	taiwan	155.302675753213	-0.0470985045359139	no
LOC105193814	whole_body_queen_taiwan	93.3284693305417	41.9426747126625	36.6233302330263	SBSb-virgin-queens-4	taiwan	78.5660049456888	-0.190784498386041	no
LOC105193814	whole_body_queen_taiwan	93.3284693305417	42.7749824256624	43.881956235421	SBSb-virgin-queens-2	taiwan	86.6569386610834	0.036028959499622	no
LOC105193814	whole_body_queen_taiwan	93.3284693305417	54	46	SBSb-virgin-queens-3	taiwan	100	-0.226770861847022	no
LOC105193815	whole_body_queen_taiwan	73.1120412489116	12.7651618690712	16.4804986048618	SBSb-virgin-queens-4	taiwan	29.245660473933	0.344724760966556	no
LOC105193815	whole_body_queen_taiwan	73.1120412489116	38	31	SBSb-virgin-queens-3	taiwan	69	-0.285402218862248	no
LOC105193815	whole_body_queen_taiwan	73.1120412489116	53.334498207478	41.2797937330515	SBSb-virgin-queens-1	taiwan	94.6142919405294	-0.361900150428874	no
LOC105193815	whole_body_queen_taiwan	73.1120412489116	35.1705411055447	42.0535413922785	SBSb-virgin-queens-2	taiwan	77.2240824978231	0.251316731518477	no
LOC105193816	whole_body_queen_taiwan	1.96492565956358	5	9	SBSb-virgin-queens-3	taiwan	14	0.736965594166206	no
LOC105193816	whole_body_queen_taiwan	1.96492565956358	0	1.83116651165131	SBSb-virgin-queens-4	taiwan	1.83116651165131	1.50139660211161	no
LOC105193816	whole_body_queen_taiwan	1.96492565956358	0	1.82841484314254	SBSb-virgin-queens-2	taiwan	1.82841484314254	1.49999373551223	no
LOC105193816	whole_body_queen_taiwan	1.96492565956358	1.06668996414956	1.03199484332629	SBSb-virgin-queens-1	taiwan	2.09868480747585	-0.0244252372222371	no
LOC105193817	whole_body_queen_taiwan	6.13067965080213	4	2	SBSb-virgin-queens-3	taiwan	6	-0.736965594166206	no
LOC105193817	whole_body_queen_taiwan	6.13067965080213	4.55898638181115	7.32466604660526	SBSb-virgin-queens-4	taiwan	11.8836524284164	0.582570550168889	no
LOC105193817	whole_body_queen_taiwan	6.13067965080213	2.13337992829912	4.12797937330515	SBSb-virgin-queens-1	taiwan	6.26135930160426	0.710670749053483	no
LOC105193817	whole_body_queen_taiwan	6.13067965080213	0.95055516501472	3.65682968628509	SBSb-virgin-queens-2	taiwan	4.60738485129981	1.25546331879073	no
LOC105193818	whole_body_queen_taiwan	1.932381293293	0.95055516501472	0.914207421571271	SBSb-virgin-queens-2	taiwan	1.86476258658599	-0.0271376335436875	no
LOC105193818	whole_body_queen_taiwan	1.932381293293	0.911797276362229	0.915583255825657	SBSb-virgin-queens-4	taiwan	1.82738053218789	0.002854179526889	no
LOC105193818	whole_body_queen_taiwan	1.932381293293	1	1	SBSb-virgin-queens-3	taiwan	2	0	no
LOC105193818	whole_body_queen_taiwan	1.932381293293	1.06668996414956	1.03199484332629	SBSb-virgin-queens-1	taiwan	2.09868480747585	-0.0244252372222371	no
LOC105193819	whole_body_queen_taiwan	3.32186629737163	1.06668996414956	0	SBSb-virgin-queens-1	taiwan	1.06668996414956	-1.04732197815267	no
LOC105193819	whole_body_queen_taiwan	3.32186629737163	1.90111033002944	2.74262226471381	SBSb-virgin-queens-2	taiwan	4.64373259474325	0.36744428462516	no
LOC105193819	whole_body_queen_taiwan	3.32186629737163	7.29437821089783	3.66233302330263	SBSb-virgin-queens-4	taiwan	10.9567112342005	-0.831081775777114	no
LOC105193819	whole_body_queen_taiwan	3.32186629737163	1	1	SBSb-virgin-queens-3	taiwan	2	0	no
LOC105193820	whole_body_queen_taiwan	85.3310399811	29.1775128435913	38.4544967446776	SBSb-virgin-queens-4	taiwan	67.6320095882689	0.38671583040734	no
LOC105193820	whole_body_queen_taiwan	85.3310399811	46.9343584225806	55.7277215396195	SBSb-virgin-queens-1	taiwan	102.6620799622	0.242993796845942	no
LOC105193820	whole_body_queen_taiwan	85.3310399811	85.5499648513248	91.4207421571271	SBSb-virgin-queens-2	taiwan	176.970707008452	0.0946834409806489	no
LOC105193820	whole_body_queen_taiwan	85.3310399811	32	36	SBSb-virgin-queens-3	taiwan	68	0.165059246270496	no
LOC105193821	whole_body_queen_taiwan	59.0218320365985	29.8673189961877	33.0238349864412	SBSb-virgin-queens-1	taiwan	62.8911539826288	0.140465581058755	no
LOC105193821	whole_body_queen_taiwan	59.0218320365985	29.1775128435913	32.045413953898	SBSb-virgin-queens-4	taiwan	61.2229267974893	0.130976160865674	no
LOC105193821	whole_body_queen_taiwan	59.0218320365985	27.5660997854269	29.2546374902807	SBSb-virgin-queens-2	taiwan	56.8207372757076	0.082852224193171	no
LOC105193821	whole_body_queen_taiwan	59.0218320365985	26	28	SBSb-virgin-queens-3	taiwan	54	0.103093492964104	no
LOC105193822	whole_body_queen_taiwan	5.52193379617081	1.82359455272446	3.66233302330263	SBSb-virgin-queens-4	taiwan	5.48592757602709	0.723519114490083	no
LOC105193822	whole_body_queen_taiwan	5.52193379617081	1.90111033002944	3.65682968628509	SBSb-virgin-queens-2	taiwan	5.55794001631453	0.682742956926329	no
LOC105193822	whole_body_queen_taiwan	5.52193379617081	3	4	SBSb-virgin-queens-3	taiwan	7	0.321928094887362	no
LOC105193822	whole_body_queen_taiwan	5.52193379617081	1.06668996414956	3.09598452997886	SBSb-virgin-queens-1	taiwan	4.16267449412842	0.986888288316849	no
LOC105193823	whole_body_queen_taiwan	1.932381293293	0.95055516501472	0.914207421571271	SBSb-virgin-queens-2	taiwan	1.86476258658599	-0.0271376335436875	no
LOC105193823	whole_body_queen_taiwan	1.932381293293	0.911797276362229	0.915583255825657	SBSb-virgin-queens-4	taiwan	1.82738053218789	0.002854179526889	no
LOC105193823	whole_body_queen_taiwan	1.932381293293	1	1	SBSb-virgin-queens-3	taiwan	2	0	no
LOC105193823	whole_body_queen_taiwan	1.932381293293	1.06668996414956	1.03199484332629	SBSb-virgin-queens-1	taiwan	2.09868480747585	-0.0244252372222371	no
LOC105193824	whole_body_queen_taiwan	4.63202978955063	3.80222066005888	1.82841484314254	SBSb-virgin-queens-2	taiwan	5.63063550320142	-0.763707960821336	no
LOC105193824	whole_body_queen_taiwan	4.63202978955063	3.20006989244868	2.06398968665257	SBSb-virgin-queens-1	taiwan	5.26405957910125	-0.455001894485993	no
LOC105193824	whole_body_queen_taiwan	4.63202978955063	4	0	SBSb-virgin-queens-3	taiwan	4	-2.32192809488736	no
LOC105193824	whole_body_queen_taiwan	4.63202978955063	0.911797276362229	0.915583255825657	SBSb-virgin-queens-4	taiwan	1.82738053218789	0.002854179526889	no
LOC105193825	whole_body_queen_taiwan	19.3920458831942	19.0111033002944	8.22786679414144	SBSb-virgin-queens-2	taiwan	27.2389700944358	-1.11673162784008	no
LOC105193825	whole_body_queen_taiwan	19.3920458831942	8.20617548726006	4.57791627912829	SBSb-virgin-queens-4	taiwan	12.7840917663883	-0.722875662721827	no
LOC105193825	whole_body_queen_taiwan	19.3920458831942	2.13337992829912	3.09598452997886	SBSb-virgin-queens-1	taiwan	5.22936445827798	0.386490556626067	no
LOC105193825	whole_body_queen_taiwan	19.3920458831942	18	8	SBSb-virgin-queens-3	taiwan	26	-1.07800251200127	no
LOC105193826	whole_body_queen_taiwan	7.31531775160071	4	5	SBSb-virgin-queens-3	taiwan	9	0.263034405833794	no
LOC105193826	whole_body_queen_taiwan	7.31531775160071	2.73539182908669	1.83116651165131	SBSb-virgin-queens-4	taiwan	4.566558340738	-0.399862982330147	no
LOC105193826	whole_body_queen_taiwan	7.31531775160071	3.80222066005888	1.82841484314254	SBSb-virgin-queens-2	taiwan	5.63063550320142	-0.763707960821336	no
LOC105193826	whole_body_queen_taiwan	7.31531775160071	7.46682974904692	2.06398968665257	SBSb-virgin-queens-1	taiwan	9.53081943569949	-1.46641043847362	no
LOC105193827	whole_body_queen_taiwan	16.32381293293	2.13337992829912	7.22396390328401	SBSb-virgin-queens-1	taiwan	9.35734383158312	1.39211422240873	no
LOC105193827	whole_body_queen_taiwan	16.32381293293	8	6	SBSb-virgin-queens-3	taiwan	14	-0.362570079384708	no
LOC105193827	whole_body_queen_taiwan	16.32381293293	14.5887564217957	14.6493320932105	SBSb-virgin-queens-4	taiwan	29.2380885150062	0.00559524186306054	no
LOC105193827	whole_body_queen_taiwan	16.32381293293	9.5055516501472	9.14207421571271	SBSb-virgin-queens-2	taiwan	18.6476258658599	-0.050799183784065	no
LOC105193828	whole_body_queen_taiwan	47.1573829203307	21.8831346326935	21.9739981398158	SBSb-virgin-queens-4	taiwan	43.8571327725093	0.00571725682591723	no
LOC105193828	whole_body_queen_taiwan	47.1573829203307	29.8673189961877	22.7038865531783	SBSb-virgin-queens-1	taiwan	52.571205549366	-0.380956555361483	no
LOC105193828	whole_body_queen_taiwan	47.1573829203307	18	20	SBSb-virgin-queens-3	taiwan	38	0.144389909335175	no
LOC105193828	whole_body_queen_taiwan	47.1573829203307	28.5166549504416	21.9409781177105	SBSb-virgin-queens-2	taiwan	50.4576330681521	-0.363602329799748	no
LOC105193829	whole_body_queen_taiwan	50.653684176386	18	29	SBSb-virgin-queens-3	taiwan	47	0.658963082164933	no
LOC105193829	whole_body_queen_taiwan	50.653684176386	21.8831346326935	29.298664186421	SBSb-virgin-queens-4	taiwan	51.1817988191145	0.404969496889999	no
LOC105193829	whole_body_queen_taiwan	50.653684176386	21.8627687953386	30.168844911852	SBSb-virgin-queens-2	taiwan	52.0316137071905	0.447104559331024	no
LOC105193829	whole_body_queen_taiwan	50.653684176386	18.1337293905425	31.9918401431149	SBSb-virgin-queens-1	taiwan	50.1255695336574	0.785991148031116	no
LOC105193830	whole_body_queen_taiwan	17.6691870182185	7.29437821089783	9.15583255825657	SBSb-virgin-queens-4	taiwan	16.4502107691544	0.292102775688489	no
LOC105193830	whole_body_queen_taiwan	17.6691870182185	4	7	SBSb-virgin-queens-3	taiwan	11	0.678071905112638	no
LOC105193830	whole_body_queen_taiwan	17.6691870182185	9.60020967734603	9.28795358993658	SBSb-virgin-queens-1	taiwan	18.8881632672826	-0.0431367626452388	no
LOC105193830	whole_body_queen_taiwan	17.6691870182185	7.60444132011776	12.7989039019978	SBSb-virgin-queens-2	taiwan	20.4033452221156	0.681400245629995	no
LOC105193831	whole_body_queen_taiwan	123.799247999412	34	58	SBSb-virgin-queens-3	taiwan	92	0.753360032416875	taiwan
LOC105193831	whole_body_queen_taiwan	123.799247999412	43.7255375906771	85.0212902061282	SBSb-virgin-queens-2	taiwan	128.746827796805	0.943594946727474	taiwan
LOC105193831	whole_body_queen_taiwan	123.799247999412	41.9426747126625	76.9089934893552	SBSb-virgin-queens-4	taiwan	118.851668202018	0.859377823397715	taiwan
LOC105193831	whole_body_queen_taiwan	123.799247999412	51.2011182791788	108.35945854926	SBSb-virgin-queens-1	taiwan	159.560576828439	1.06692538673871	taiwan
LOC105193832	whole_body_queen_taiwan	26.0692639264891	19	3	SBSb-virgin-queens-3	taiwan	22	-2.32192809488736	no
LOC105193832	whole_body_queen_taiwan	26.0692639264891	16.0003494622434	4.12797937330515	SBSb-virgin-queens-1	taiwan	20.1283288355485	-1.72910203895714	no
LOC105193832	whole_body_queen_taiwan	26.0692639264891	23.763879125368	9.14207421571271	SBSb-virgin-queens-2	taiwan	32.9059533410807	-1.28788458586079	no
LOC105193832	whole_body_queen_taiwan	26.0692639264891	18.2359455272446	11.9025823257335	SBSb-virgin-queens-4	taiwan	30.1385278529781	-0.576144910020582	no
LOC105193833	whole_body_queen_taiwan	13.8768420601867	4.55898638181115	8.24024930243092	SBSb-virgin-queens-4	taiwan	12.7992356842421	0.733109928325031	no
LOC105193833	whole_body_queen_taiwan	13.8768420601867	7	5	SBSb-virgin-queens-3	taiwan	12	-0.415037499278844	no
LOC105193833	whole_body_queen_taiwan	13.8768420601867	7.46682974904692	11.3519432765892	SBSb-virgin-queens-1	taiwan	18.8187730256361	0.544844247728761	no
LOC105193833	whole_body_queen_taiwan	13.8768420601867	8.55499648513248	6.3994519509989	SBSb-virgin-queens-2	taiwan	14.9544484361314	-0.368836922683012	no
LOC105193834	whole_body_queen_taiwan	70.004166122973	30.4177652804711	46.6245785001348	SBSb-virgin-queens-2	taiwan	77.0423437806059	0.600125757551991	no
LOC105193834	whole_body_queen_taiwan	70.004166122973	17.3241482508824	49.4414958145855	SBSb-virgin-queens-4	taiwan	66.7656440654679	1.46086491853218	no
LOC105193834	whole_body_queen_taiwan	70.004166122973	25.6005591395894	45.4077731063566	SBSb-virgin-queens-1	taiwan	71.008332245946	0.802909899660729	no
LOC105193834	whole_body_queen_taiwan	70.004166122973	29	40	SBSb-virgin-queens-3	taiwan	69	0.450661409009565	no
LOC105193835	whole_body_queen_taiwan	8.35886453248947	1.06668996414956	1.03199484332629	SBSb-virgin-queens-1	taiwan	2.09868480747585	-0.0244252372222371	no
LOC105193835	whole_body_queen_taiwan	8.35886453248947	0	1.82841484314254	SBSb-virgin-queens-2	taiwan	1.82841484314254	1.49999373551223	no
LOC105193835	whole_body_queen_taiwan	8.35886453248947	7.29437821089783	7.32466604660526	SBSb-virgin-queens-4	taiwan	14.6190442575031	0.00525856458111424	no
LOC105193835	whole_body_queen_taiwan	8.35886453248947	18	19	SBSb-virgin-queens-3	taiwan	37	0.0740005814437768	no
LOC105193836	whole_body_queen_taiwan	2.89217750660573	2.73539182908669	0.915583255825657	SBSb-virgin-queens-4	taiwan	3.65097508491234	-0.963475854343466	no
LOC105193836	whole_body_queen_taiwan	2.89217750660573	2.85166549504416	0.914207421571271	SBSb-virgin-queens-2	taiwan	3.76587291661543	-1.00873524786111	no
LOC105193836	whole_body_queen_taiwan	2.89217750660573	2.13337992829912	0	SBSb-virgin-queens-1	taiwan	2.13337992829912	-1.64771970984345	no
LOC105193836	whole_body_queen_taiwan	2.89217750660573	1	0	SBSb-virgin-queens-3	taiwan	1	-1	no
LOC105193837	whole_body_queen_taiwan	26.5846090693655	14.5887564217957	18.3116651165131	SBSb-virgin-queens-4	taiwan	32.9004215383088	0.308966720652622	no
LOC105193837	whole_body_queen_taiwan	26.5846090693655	10.4561068151619	13.7131113235691	SBSb-virgin-queens-2	taiwan	24.169218138731	0.360985510612088	no
LOC105193837	whole_body_queen_taiwan	26.5846090693655	15	14	SBSb-virgin-queens-3	taiwan	29	-0.0931094043914815	no
LOC105193837	whole_body_queen_taiwan	26.5846090693655	10.6668996414956	9.28795358993658	SBSb-virgin-queens-1	taiwan	19.9548532314322	-0.181465190976191	no
LOC105193839	whole_body_queen_taiwan	12.9802486068319	3.80222066005888	6.3994519509989	SBSb-virgin-queens-2	taiwan	10.2016726110578	0.623716723481515	no
LOC105193839	whole_body_queen_taiwan	12.9802486068319	8	7	SBSb-virgin-queens-3	taiwan	15	-0.169925001442312	no
LOC105193839	whole_body_queen_taiwan	12.9802486068319	10.6668996414956	5.15997421663143	SBSb-virgin-queens-1	taiwan	15.826873858127	-0.921425013158296	no
LOC105193839	whole_body_queen_taiwan	12.9802486068319	6.3825809345356	4.57791627912829	SBSb-virgin-queens-4	taiwan	10.9604972136639	-0.404398986954386	no
LOC105193870	whole_body_queen_taiwan	6.32738053218789	10.4561068151619	10.9704890588553	SBSb-virgin-queens-2	taiwan	21.4265958740172	0.0633652460693624	no
LOC105193870	whole_body_queen_taiwan	6.32738053218789	4	5	SBSb-virgin-queens-3	taiwan	9	0.263034405833794	no
LOC105193870	whole_body_queen_taiwan	6.32738053218789	1.82359455272446	1.83116651165131	SBSb-virgin-queens-4	taiwan	3.65476106437577	0.00386365895862898	no
LOC105193870	whole_body_queen_taiwan	6.32738053218789	1.06668996414956	2.06398968665257	SBSb-virgin-queens-1	taiwan	3.13067965080213	0.568089463026571	no
LOC105193871	whole_body_queen_taiwan	71.8355045473422	36.1210962705594	31.9972597549945	SBSb-virgin-queens-2	taiwan	68.1183560255539	-0.169893095787249	no
LOC105193871	whole_body_queen_taiwan	71.8355045473422	38.4008387093841	37.1518143597463	SBSb-virgin-queens-1	taiwan	75.5526530691305	-0.0464746721093606	no
LOC105193871	whole_body_queen_taiwan	71.8355045473422	47	35	SBSb-virgin-queens-3	taiwan	82	-0.415037499278844	no
LOC105193871	whole_body_queen_taiwan	71.8355045473422	32.8247019490402	29.298664186421	SBSb-virgin-queens-4	taiwan	62.1233661354613	-0.158823032482114	no
LOC105193872	whole_body_queen_taiwan	2.47434883994992	1.82359455272446	0	SBSb-virgin-queens-4	taiwan	1.82359455272446	-1.49753294315298	no
LOC105193872	whole_body_queen_taiwan	2.47434883994992	1.90111033002944	0.914207421571271	SBSb-virgin-queens-2	taiwan	2.81531775160071	-0.59985799540809	no
LOC105193872	whole_body_queen_taiwan	2.47434883994992	2.13337992829912	0	SBSb-virgin-queens-1	taiwan	2.13337992829912	-1.64771970984345	no
LOC105193872	whole_body_queen_taiwan	2.47434883994992	2	1	SBSb-virgin-queens-3	taiwan	3	-0.584962500721156	no
LOC105193873	whole_body_queen_taiwan	3.23693239771996	2	2	SBSb-virgin-queens-3	taiwan	4	0	no
LOC105193873	whole_body_queen_taiwan	3.23693239771996	0.911797276362229	2.74674976747697	SBSb-virgin-queens-4	taiwan	3.6585470438392	0.97071007767607	no
LOC105193873	whole_body_queen_taiwan	3.23693239771996	2.13337992829912	0	SBSb-virgin-queens-1	taiwan	2.13337992829912	-1.64771970984345	no
LOC105193873	whole_body_queen_taiwan	3.23693239771996	1.90111033002944	0.914207421571271	SBSb-virgin-queens-2	taiwan	2.81531775160071	-0.59985799540809	no
LOC105194381	whole_body_queen_taiwan	92.3489757804473	48.3252556471981	42.1168297679802	SBSb-virgin-queens-4	taiwan	90.4420854151784	-0.194075422701244	no
LOC105194381	whole_body_queen_taiwan	92.3489757804473	50	45	SBSb-virgin-queens-3	taiwan	95	-0.148863385914483	no
LOC105194381	whole_body_queen_taiwan	92.3489757804473	67.2014677414222	21.671891709852	SBSb-virgin-queens-1	taiwan	88.8733594512743	-1.5888980148619	no
LOC105194381	whole_body_queen_taiwan	92.3489757804473	74.1433028711482	20.112563274568	SBSb-virgin-queens-2	taiwan	94.2558661457161	-1.83154278321658	no
LOC105194416	whole_body_queen_taiwan	134.239024581835	76	55	SBSb-virgin-queens-3	taiwan	131	-0.459431618637297	no
LOC105194416	whole_body_queen_taiwan	134.239024581835	68.3847957271672	51.2726623262368	SBSb-virgin-queens-4	taiwan	119.657458053404	-0.408562920211781	no
LOC105194416	whole_body_queen_taiwan	134.239024581835	80.7971890262512	56.6808601374188	SBSb-virgin-queens-2	taiwan	137.47804916367	-0.50395858734998	no
LOC105194416	whole_body_queen_taiwan	134.239024581835	92.8020268810117	72.23963903284	SBSb-virgin-queens-1	taiwan	165.041665913852	-0.356994416216744	no
LOC105194425	whole_body_queen_taiwan	22.4851060801762	2.85166549504416	21.0267706961392	SBSb-virgin-queens-2	taiwan	23.8784361911834	2.51570367946984	taiwan
LOC105194425	whole_body_queen_taiwan	22.4851060801762	1	22	SBSb-virgin-queens-3	taiwan	23	3.52356195605701	taiwan
LOC105194425	whole_body_queen_taiwan	22.4851060801762	2.13337992829912	16.5119174932206	SBSb-virgin-queens-1	taiwan	18.6452974215197	2.4825454474848	taiwan
LOC105194425	whole_body_queen_taiwan	22.4851060801762	0.911797276362229	21.0584148839901	SBSb-virgin-queens-4	taiwan	21.9702121603524	3.52832766701448	taiwan
LOC105194434	whole_body_queen_taiwan	71.1953682619415	66.1347777772727	8.25595874661029	SBSb-virgin-queens-1	taiwan	74.390736523883	-2.85860597872514	taiwan
LOC105194434	whole_body_queen_taiwan	71.1953682619415	58.3550256871827	1.83116651165131	SBSb-virgin-queens-4	taiwan	60.186192198834	-4.38990168316542	taiwan
LOC105194434	whole_body_queen_taiwan	71.1953682619415	64	4	SBSb-virgin-queens-3	taiwan	68	-3.70043971814109	taiwan
LOC105194434	whole_body_queen_taiwan	71.1953682619415	82.6982993562807	7.31365937257017	SBSb-virgin-queens-2	taiwan	90.0119587288508	-3.33164276517882	taiwan
LOC105194441	whole_body_queen_taiwan	18.3882599037307	10.0297700399845	2.74674976747697	SBSb-virgin-queens-4	taiwan	12.7765198074615	-1.55769117908937	no
LOC105194441	whole_body_queen_taiwan	18.3882599037307	26.667249103739	9.28795358993658	SBSb-virgin-queens-1	taiwan	35.9552026936756	-1.42722316731066	no
LOC105194441	whole_body_queen_taiwan	18.3882599037307	5.70333099008832	4.57103710785636	SBSb-virgin-queens-2	taiwan	10.2743680979447	-0.266932245889578	no
LOC105194441	whole_body_queen_taiwan	18.3882599037307	14	10	SBSb-virgin-queens-3	taiwan	24	-0.447458976971221	no
LOC105194453	whole_body_queen_taiwan	126.029484442628	67.2014677414222	42.3117885763777	SBSb-virgin-queens-1	taiwan	109.5132563178	-0.655043037087834	no
LOC105194453	whole_body_queen_taiwan	126.029484442628	70.2083902798916	55.8505786053651	SBSb-virgin-queens-4	taiwan	126.058968885257	-0.324872207376494	no
LOC105194453	whole_body_queen_taiwan	126.029484442628	91.2532958414131	66.7371417747028	SBSb-virgin-queens-2	taiwan	157.990437616116	-0.445653341425728	no
LOC105194453	whole_body_queen_taiwan	126.029484442628	70	56	SBSb-virgin-queens-3	taiwan	126	-0.31685710533994	no
LOC105194461	whole_body_queen_taiwan	7.8407020312062	3.64718910544892	2.74674976747697	SBSb-virgin-queens-4	taiwan	6.39393887292589	-0.310718724572411	no
LOC105194461	whole_body_queen_taiwan	7.8407020312062	3.80222066005888	5.48524452942763	SBSb-virgin-queens-2	taiwan	9.28746518948651	0.43345927671575	no
LOC105194461	whole_body_queen_taiwan	7.8407020312062	4.26675985659824	2.06398968665257	SBSb-virgin-queens-1	taiwan	6.33074954325081	-0.781504238629094	no
LOC105194461	whole_body_queen_taiwan	7.8407020312062	4	6	SBSb-virgin-queens-3	taiwan	10	0.485426827170242	no
LOC105194469	whole_body_queen_taiwan	0.97527758250736	0.95055516501472	0	SBSb-virgin-queens-2	taiwan	0.95055516501472	-0.963884800806843	no
LOC105194469	whole_body_queen_taiwan	0.97527758250736	0.911797276362229	0	SBSb-virgin-queens-4	taiwan	0.911797276362229	-0.934929550571406	no
LOC105194469	whole_body_queen_taiwan	0.97527758250736	0	1	SBSb-virgin-queens-3	taiwan	1	1	no
LOC105194469	whole_body_queen_taiwan	0.97527758250736	0	1.03199484332629	SBSb-virgin-queens-1	taiwan	1.03199484332629	1.02289674093044	no
LOC105194481	whole_body_queen_taiwan	8725.54278855505	5363.03224101305	3047.05333609705	SBSb-virgin-queens-2	taiwan	8410.0855771101	-0.815429760794527	taiwan
LOC105194481	whole_body_queen_taiwan	8725.54278855505	5306	3735	SBSb-virgin-queens-3	taiwan	9041	-0.506402093701953	taiwan
LOC105194481	whole_body_queen_taiwan	8725.54278855505	6430.00710389354	3289.9995605242	SBSb-virgin-queens-1	taiwan	9720.00666441775	-0.966518849317408	taiwan
LOC105194481	whole_body_queen_taiwan	8725.54278855505	4453.21789775313	3742.90434981529	SBSb-virgin-queens-4	taiwan	8196.12224756841	-0.250628558589579	taiwan
LOC105194487	whole_body_queen_taiwan	148.849874989973	34.2199859405299	69.4797640394166	SBSb-virgin-queens-2	taiwan	103.699749979947	1.00081476097976	no
LOC105194487	whole_body_queen_taiwan	148.849874989973	74	120	SBSb-virgin-queens-3	taiwan	194	0.690044546778714	no
LOC105194487	whole_body_queen_taiwan	148.849874989973	13.6769591454334	78.7401600010065	SBSb-virgin-queens-4	taiwan	92.41711914644	2.44175340664309	no
LOC105194487	whole_body_queen_taiwan	148.849874989973	172.803774192229	164.08718008888	SBSb-virgin-queens-1	taiwan	336.890954281108	-0.0742313194350307	no
LOC105194495	whole_body_queen_taiwan	285.326771127532	154	130	SBSb-virgin-queens-3	taiwan	284	-0.242701403736787	no
LOC105194495	whole_body_queen_taiwan	285.326771127532	180.605481352797	106.048060902267	SBSb-virgin-queens-2	taiwan	286.653542255064	-0.762549085200185	no
LOC105194495	whole_body_queen_taiwan	285.326771127532	734.949385299046	239.422803651698	SBSb-virgin-queens-1	taiwan	974.372188950745	-1.61403280931419	no
LOC105194495	whole_body_queen_taiwan	285.326771127532	81.1499575962384	68.6687441869243	SBSb-virgin-queens-4	taiwan	149.818701783163	-0.237748272247441	no
LOC105194501	whole_body_queen_taiwan	20.4934240373792	10.6668996414956	10.3199484332629	SBSb-virgin-queens-1	taiwan	20.9868480747585	-0.0435538444654626	no
LOC105194501	whole_body_queen_taiwan	20.4934240373792	10.0297700399845	13.7337488373849	SBSb-virgin-queens-4	taiwan	23.7635188773694	0.417721842227661	no
LOC105194501	whole_body_queen_taiwan	20.4934240373792	5.70333099008832	0	SBSb-virgin-queens-2	taiwan	5.70333099008832	-2.74487817149492	no
LOC105194501	whole_body_queen_taiwan	20.4934240373792	13	7	SBSb-virgin-queens-3	taiwan	20	-0.807354922057604	no
LOC105194510	whole_body_queen_taiwan	1.932381293293	0.911797276362229	0.915583255825657	SBSb-virgin-queens-4	taiwan	1.82738053218789	0.002854179526889	no
LOC105194510	whole_body_queen_taiwan	1.932381293293	1	1	SBSb-virgin-queens-3	taiwan	2	0	no
LOC105194510	whole_body_queen_taiwan	1.932381293293	1.06668996414956	1.03199484332629	SBSb-virgin-queens-1	taiwan	2.09868480747585	-0.0244252372222371	no
LOC105194510	whole_body_queen_taiwan	1.932381293293	0.95055516501472	0.914207421571271	SBSb-virgin-queens-2	taiwan	1.86476258658599	-0.0271376335436875	no
LOC105194522	whole_body_queen_taiwan	3.38948500407863	2	2	SBSb-virgin-queens-3	taiwan	4	0	no
LOC105194522	whole_body_queen_taiwan	3.38948500407863	0	0.915583255825657	SBSb-virgin-queens-4	taiwan	0.915583255825657	0.937783730098295	no
LOC105194522	whole_body_queen_taiwan	3.38948500407863	0.95055516501472	1.82841484314254	SBSb-virgin-queens-2	taiwan	2.77897000815726	0.536108934705382	no
LOC105194522	whole_body_queen_taiwan	3.38948500407863	1.06668996414956	3.09598452997886	SBSb-virgin-queens-1	taiwan	4.16267449412842	0.986888288316849	no
LOC105194585	whole_body_queen_taiwan	23.7878777458518	13	9	SBSb-virgin-queens-3	taiwan	22	-0.485426827170242	no
LOC105194585	whole_body_queen_taiwan	23.7878777458518	14.5887564217957	10.9869990699079	SBSb-virgin-queens-4	taiwan	25.5757554917036	-0.379035315930908	no
LOC105194585	whole_body_queen_taiwan	23.7878777458518	10.6668996414956	9.28795358993658	SBSb-virgin-queens-1	taiwan	19.9548532314322	-0.181465190976191	no
LOC105194585	whole_body_queen_taiwan	23.7878777458518	17.109992970265	14.6273187451403	SBSb-virgin-queens-2	taiwan	31.7373117154053	-0.212715716893116	no
LOC105194601	whole_body_queen_taiwan	1.01599742166314	0.95055516501472	0.914207421571271	SBSb-virgin-queens-2	taiwan	1.86476258658599	-0.0271376335436875	no
LOC105194601	whole_body_queen_taiwan	1.01599742166314	0	0	SBSb-virgin-queens-4	taiwan	0	0	no
LOC105194601	whole_body_queen_taiwan	1.01599742166314	0	1	SBSb-virgin-queens-3	taiwan	1	1	no
LOC105194601	whole_body_queen_taiwan	1.01599742166314	0	1.03199484332629	SBSb-virgin-queens-1	taiwan	1.03199484332629	1.02289674093044	no
LOC105194610	whole_body_queen_taiwan	5.96344454209363	2.13337992829912	6.19196905995772	SBSb-virgin-queens-1	taiwan	8.32534898825684	1.1986671045098	no
LOC105194610	whole_body_queen_taiwan	5.96344454209363	0.95055516501472	4.57103710785636	SBSb-virgin-queens-2	taiwan	5.52159227287108	1.5140611247985	no
LOC105194610	whole_body_queen_taiwan	5.96344454209363	0.911797276362229	5.49349953495394	SBSb-virgin-queens-4	taiwan	6.40529681131617	1.76406664737829	no
LOC105194610	whole_body_queen_taiwan	5.96344454209363	1	4	SBSb-virgin-queens-3	taiwan	5	1.32192809488736	no
LOC105194616	whole_body_queen_taiwan	1.84607155938694	0.911797276362229	0.915583255825657	SBSb-virgin-queens-4	taiwan	1.82738053218789	0.002854179526889	no
LOC105194616	whole_body_queen_taiwan	1.84607155938694	1.06668996414956	0	SBSb-virgin-queens-1	taiwan	1.06668996414956	-1.04732197815267	no
LOC105194616	whole_body_queen_taiwan	1.84607155938694	0.95055516501472	0.914207421571271	SBSb-virgin-queens-2	taiwan	1.86476258658599	-0.0271376335436875	no
LOC105194616	whole_body_queen_taiwan	1.84607155938694	1	1	SBSb-virgin-queens-3	taiwan	2	0	no
LOC105194663	whole_body_queen_taiwan	45.5868830209828	24.5338691754399	20.6398968665257	SBSb-virgin-queens-1	taiwan	45.1737660419656	-0.238718544037239	no
LOC105194663	whole_body_queen_taiwan	45.5868830209828	13.6769591454334	13.7337488373849	SBSb-virgin-queens-4	taiwan	27.4107079828183	0.00557146117150187	no
LOC105194663	whole_body_queen_taiwan	45.5868830209828	36.1210962705594	23.7693929608531	SBSb-virgin-queens-2	taiwan	59.8904892314124	-0.583680805187022	no
LOC105194663	whole_body_queen_taiwan	45.5868830209828	24	22	SBSb-virgin-queens-3	taiwan	46	-0.120294233717712	no
LOC105194672	whole_body_queen_taiwan	191.082774055581	103.944889505294	95.2206586058684	SBSb-virgin-queens-4	taiwan	199.165548111162	-0.125213334064454	no
LOC105194672	whole_body_queen_taiwan	191.082774055581	111.214954306722	115.19013511798	SBSb-virgin-queens-2	taiwan	226.405089424702	0.0502226356500785	no
LOC105194672	whole_body_queen_taiwan	191.082774055581	98	85	SBSb-virgin-queens-3	taiwan	183	-0.203091865377512	no
LOC105194672	whole_body_queen_taiwan	191.082774055581	68.2681577055718	70.1756493461875	SBSb-virgin-queens-1	taiwan	138.443807051759	0.0391914463279574	no
LOC105194675	whole_body_queen_taiwan	95.0118938368851	56.0827547358685	45.7103710785636	SBSb-virgin-queens-2	taiwan	101.793125814432	-0.289312052683766	no
LOC105194675	whole_body_queen_taiwan	95.0118938368851	47.4134583708359	47.6103293029342	SBSb-virgin-queens-4	taiwan	95.0237876737701	0.00585475199523507	no
LOC105194675	whole_body_queen_taiwan	95.0118938368851	47	48	SBSb-virgin-queens-3	taiwan	95	0.0297473433940519	no
LOC105194675	whole_body_queen_taiwan	95.0118938368851	29.8673189961877	26.8318659264834	SBSb-virgin-queens-1	taiwan	56.6991849226711	-0.149342547809488	no
LOC105194680	whole_body_queen_taiwan	2.56533982540107	0.95055516501472	0.914207421571271	SBSb-virgin-queens-2	taiwan	1.86476258658599	-0.0271376335436875	no
LOC105194680	whole_body_queen_taiwan	2.56533982540107	1.06668996414956	2.06398968665257	SBSb-virgin-queens-1	taiwan	3.13067965080213	0.568089463026571	no
LOC105194680	whole_body_queen_taiwan	2.56533982540107	1	1	SBSb-virgin-queens-3	taiwan	2	0	no
LOC105194680	whole_body_queen_taiwan	2.56533982540107	4.55898638181115	3.66233302330263	SBSb-virgin-queens-4	taiwan	8.22131940511377	-0.253769790189339	no
LOC105194690	whole_body_queen_taiwan	13.8429044619523	6.65388615510304	10.056281637284	SBSb-virgin-queens-2	taiwan	16.710167792387	0.530601923713618	no
LOC105194690	whole_body_queen_taiwan	13.8429044619523	2.73539182908669	8.24024930243092	SBSb-virgin-queens-4	taiwan	10.9756411315176	1.30667219171568	no
LOC105194690	whole_body_queen_taiwan	13.8429044619523	2.13337992829912	8.25595874661029	SBSb-virgin-queens-1	taiwan	10.3893386749094	1.5626627245897	no
LOC105194690	whole_body_queen_taiwan	13.8429044619523	12	6	SBSb-virgin-queens-3	taiwan	18	-0.893084796083488	no
LOC105194700	whole_body_queen_taiwan	0.97527758250736	1	0	SBSb-virgin-queens-3	taiwan	1	-1	no
LOC105194700	whole_body_queen_taiwan	0.97527758250736	0.95055516501472	0	SBSb-virgin-queens-2	taiwan	0.95055516501472	-0.963884800806843	no
LOC105194700	whole_body_queen_taiwan	0.97527758250736	1.06668996414956	0	SBSb-virgin-queens-1	taiwan	1.06668996414956	-1.04732197815267	no
LOC105194700	whole_body_queen_taiwan	0.97527758250736	0	0.915583255825657	SBSb-virgin-queens-4	taiwan	0.915583255825657	0.937783730098295	no
LOC105194727	whole_body_queen_taiwan	0.990448692860415	2	0	SBSb-virgin-queens-3	taiwan	2	-1.58496250072116	no
LOC105194727	whole_body_queen_taiwan	0.990448692860415	1.06668996414956	0	SBSb-virgin-queens-1	taiwan	1.06668996414956	-1.04732197815267	no
LOC105194727	whole_body_queen_taiwan	0.990448692860415	0	0	SBSb-virgin-queens-4	taiwan	0	0	no
LOC105194727	whole_body_queen_taiwan	0.990448692860415	0	0.914207421571271	SBSb-virgin-queens-2	taiwan	0.914207421571271	0.936747167263155	no
LOC105194738	whole_body_queen_taiwan	1.84607155938694	1.06668996414956	0	SBSb-virgin-queens-1	taiwan	1.06668996414956	-1.04732197815267	no
LOC105194738	whole_body_queen_taiwan	1.84607155938694	0.95055516501472	0.914207421571271	SBSb-virgin-queens-2	taiwan	1.86476258658599	-0.0271376335436875	no
LOC105194738	whole_body_queen_taiwan	1.84607155938694	1	1	SBSb-virgin-queens-3	taiwan	2	0	no
LOC105194738	whole_body_queen_taiwan	1.84607155938694	0.911797276362229	0.915583255825657	SBSb-virgin-queens-4	taiwan	1.82738053218789	0.002854179526889	no
LOC105194763	whole_body_queen_taiwan	2.42082429774469	1	3	SBSb-virgin-queens-3	taiwan	4	1	no
LOC105194763	whole_body_queen_taiwan	2.42082429774469	0.911797276362229	1.83116651165131	SBSb-virgin-queens-4	taiwan	2.74296378801354	0.566467051540207	no
LOC105194763	whole_body_queen_taiwan	2.42082429774469	1.06668996414956	1.03199484332629	SBSb-virgin-queens-1	taiwan	2.09868480747585	-0.0244252372222371	no
LOC105194763	whole_body_queen_taiwan	2.42082429774469	0.95055516501472	0.914207421571271	SBSb-virgin-queens-2	taiwan	1.86476258658599	-0.0271376335436875	no
LOC105194770	whole_body_queen_taiwan	13.5901219804992	5	10	SBSb-virgin-queens-3	taiwan	15	0.874469117916141	no
LOC105194770	whole_body_queen_taiwan	13.5901219804992	6.3825809345356	8.24024930243092	SBSb-virgin-queens-4	taiwan	14.6228302369665	0.323806508582411	no
LOC105194770	whole_body_queen_taiwan	13.5901219804992	5.3334498207478	7.22396390328401	SBSb-virgin-queens-1	taiwan	12.5574137240318	0.376842384645072	no
LOC105194770	whole_body_queen_taiwan	13.5901219804992	1.90111033002944	7.31365937257017	SBSb-virgin-queens-2	taiwan	9.21476970259961	1.51887847636983	no
LOC105194795	whole_body_queen_taiwan	48.8175976180093	16	27	SBSb-virgin-queens-3	taiwan	43	0.719892080807265	no
LOC105194795	whole_body_queen_taiwan	48.8175976180093	20.9122136303238	17.3699410098542	SBSb-virgin-queens-2	taiwan	38.282154640178	-0.2543882429673	no
LOC105194795	whole_body_queen_taiwan	48.8175976180093	31.912904672678	27.4674976747697	SBSb-virgin-queens-4	taiwan	59.3804023474477	-0.209337670560911	no
LOC105194795	whole_body_queen_taiwan	48.8175976180093	29.8673189961877	24.7678762398309	SBSb-virgin-queens-1	taiwan	54.6351952360185	-0.260506545299762	no
LOC105194811	whole_body_queen_taiwan	95.5377975115467	22.8133239603533	85.9354976276995	SBSb-virgin-queens-2	taiwan	108.748821588053	1.86817636876874	taiwan
LOC105194811	whole_body_queen_taiwan	95.5377975115467	39.4675286735337	102.167489489302	SBSb-virgin-queens-1	taiwan	141.635018162836	1.35015176278953	taiwan
LOC105194811	whole_body_queen_taiwan	95.5377975115467	24	54	SBSb-virgin-queens-3	taiwan	78	1.13750352374994	taiwan
LOC105194811	whole_body_queen_taiwan	95.5377975115467	18.2359455272446	64.090827907796	SBSb-virgin-queens-4	taiwan	82.3267734350406	1.75864951849299	taiwan
LOC105194836	whole_body_queen_taiwan	27.6266162164299	7.46682974904692	12.3839381199154	SBSb-virgin-queens-1	taiwan	19.8507678689624	0.660608895497948	no
LOC105194836	whole_body_queen_taiwan	27.6266162164299	10.9415673163467	18.3116651165131	SBSb-virgin-queens-4	taiwan	29.2532324328599	0.693480362636364	no
LOC105194836	whole_body_queen_taiwan	27.6266162164299	16.1594378052502	27.4262226471381	SBSb-virgin-queens-2	taiwan	43.5856604523884	0.728220115970756	no
LOC105194836	whole_body_queen_taiwan	27.6266162164299	8	18	SBSb-virgin-queens-3	taiwan	26	1.07800251200127	no
LOC105194845	whole_body_queen_taiwan	1.48909855411192	0.911797276362229	0	SBSb-virgin-queens-4	taiwan	0.911797276362229	-0.934929550571406	no
LOC105194845	whole_body_queen_taiwan	1.48909855411192	0	0.914207421571271	SBSb-virgin-queens-2	taiwan	0.914207421571271	0.936747167263155	no
LOC105194845	whole_body_queen_taiwan	1.48909855411192	1	2	SBSb-virgin-queens-3	taiwan	3	0.584962500721156	no
LOC105194845	whole_body_queen_taiwan	1.48909855411192	0	2.06398968665257	SBSb-virgin-queens-1	taiwan	2.06398968665257	1.61541144117924	no
LOC105194855	whole_body_queen_taiwan	0.97527758250736	0	0.915583255825657	SBSb-virgin-queens-4	taiwan	0.915583255825657	0.937783730098295	no
LOC105194855	whole_body_queen_taiwan	0.97527758250736	0.95055516501472	0	SBSb-virgin-queens-2	taiwan	0.95055516501472	-0.963884800806843	no
LOC105194855	whole_body_queen_taiwan	0.97527758250736	1.06668996414956	0	SBSb-virgin-queens-1	taiwan	1.06668996414956	-1.04732197815267	no
LOC105194855	whole_body_queen_taiwan	0.97527758250736	1	0	SBSb-virgin-queens-3	taiwan	1	-1	no
LOC105194878	whole_body_queen_taiwan	4.04934240373792	2.73539182908669	3.66233302330263	SBSb-virgin-queens-4	taiwan	6.39772485238932	0.319792473201306	no
LOC105194878	whole_body_queen_taiwan	4.04934240373792	1.06668996414956	1.03199484332629	SBSb-virgin-queens-1	taiwan	2.09868480747585	-0.0244252372222371	no
LOC105194878	whole_body_queen_taiwan	4.04934240373792	2	4	SBSb-virgin-queens-3	taiwan	6	0.736965594166206	no
LOC105194878	whole_body_queen_taiwan	4.04934240373792	0	0.914207421571271	SBSb-virgin-queens-2	taiwan	0.914207421571271	0.936747167263155	no
LOC105194887	whole_body_queen_taiwan	6.36476258658599	1.06668996414956	1.03199484332629	SBSb-virgin-queens-1	taiwan	2.09868480747585	-0.0244252372222371	no
LOC105194887	whole_body_queen_taiwan	6.36476258658599	5	4	SBSb-virgin-queens-3	taiwan	9	-0.263034405833794	no
LOC105194887	whole_body_queen_taiwan	6.36476258658599	4.55898638181115	4.57791627912829	SBSb-virgin-queens-4	taiwan	9.13690266093943	0.00490443278823339	no
LOC105194887	whole_body_queen_taiwan	6.36476258658599	1.90111033002944	1.82841484314254	SBSb-virgin-queens-2	taiwan	3.72952517317198	-0.0366114271590206	no
LOC105194902	whole_body_queen_taiwan	11.0148850199923	0.95055516501472	0	SBSb-virgin-queens-2	taiwan	0.95055516501472	-0.963884800806843	taiwan
LOC105194902	whole_body_queen_taiwan	11.0148850199923	12	0	SBSb-virgin-queens-3	taiwan	12	-3.70043971814109	taiwan
LOC105194902	whole_body_queen_taiwan	11.0148850199923	10.0297700399845	0	SBSb-virgin-queens-4	taiwan	10.0297700399845	-3.46333080733684	taiwan
LOC105194902	whole_body_queen_taiwan	11.0148850199923	12.8002795697947	0	SBSb-virgin-queens-1	taiwan	12.8002795697947	-3.78662558869305	taiwan
LOC105195673	whole_body_queen_taiwan	1.01599742166314	0	1.03199484332629	SBSb-virgin-queens-1	taiwan	1.03199484332629	1.02289674093044	no
LOC105195673	whole_body_queen_taiwan	1.01599742166314	0.95055516501472	0.914207421571271	SBSb-virgin-queens-2	taiwan	1.86476258658599	-0.0271376335436875	no
LOC105195673	whole_body_queen_taiwan	1.01599742166314	0	1	SBSb-virgin-queens-3	taiwan	1	1	no
LOC105195673	whole_body_queen_taiwan	1.01599742166314	0.911797276362229	0	SBSb-virgin-queens-4	taiwan	0.911797276362229	-0.934929550571406	no
LOC105195681	whole_body_queen_taiwan	5.88720501976388	4	4	SBSb-virgin-queens-3	taiwan	8	0	no
LOC105195681	whole_body_queen_taiwan	5.88720501976388	3.20006989244868	3.09598452997886	SBSb-virgin-queens-1	taiwan	6.29605442242754	-0.0362030691957152	no
LOC105195681	whole_body_queen_taiwan	5.88720501976388	2.85166549504416	1.82841484314254	SBSb-virgin-queens-2	taiwan	4.6800803381867	-0.445488679612038	no
LOC105195681	whole_body_queen_taiwan	5.88720501976388	3.64718910544892	1.83116651165131	SBSb-virgin-queens-4	taiwan	5.47835561710023	-0.714961750708274	no
LOC105195701	whole_body_queen_taiwan	37.446424789691	14.9336594980938	16.5119174932206	SBSb-virgin-queens-1	taiwan	31.4455769913144	0.136259412437218	no
LOC105195701	whole_body_queen_taiwan	37.446424789691	16	26	SBSb-virgin-queens-3	taiwan	42	0.667424660913129	no
LOC105195701	whole_body_queen_taiwan	37.446424789691	16.4123509745201	16.4804986048618	SBSb-virgin-queens-4	taiwan	32.892849579382	0.00563533070725311	no
LOC105195701	whole_body_queen_taiwan	37.446424789691	19.0111033002944	23.7693929608531	SBSb-virgin-queens-2	taiwan	42.7804962611475	0.307757800408931	no
LOC105195710	whole_body_queen_taiwan	1.41369026609394	1.06668996414956	1.03199484332629	SBSb-virgin-queens-1	taiwan	2.09868480747585	-0.0244252372222371	no
LOC105195710	whole_body_queen_taiwan	1.41369026609394	0	1	SBSb-virgin-queens-3	taiwan	1	1	no
LOC105195710	whole_body_queen_taiwan	1.41369026609394	0.95055516501472	0	SBSb-virgin-queens-2	taiwan	0.95055516501472	-0.963884800806843	no
LOC105195710	whole_body_queen_taiwan	1.41369026609394	0.911797276362229	0.915583255825657	SBSb-virgin-queens-4	taiwan	1.82738053218789	0.002854179526889	no
LOC105195720	whole_body_queen_taiwan	45.745767303417	14.9336594980938	16.5119174932206	SBSb-virgin-queens-1	taiwan	31.4455769913144	0.136259412437218	no
LOC105195720	whole_body_queen_taiwan	45.745767303417	28	27	SBSb-virgin-queens-3	taiwan	55	-0.050626073069968	no
LOC105195720	whole_body_queen_taiwan	45.745767303417	26.6155446204122	23.7693929608531	SBSb-virgin-queens-2	taiwan	50.3849375812652	-0.156922067843664	no
LOC105195720	whole_body_queen_taiwan	45.745767303417	22.7949319090557	18.3116651165131	SBSb-virgin-queens-4	taiwan	41.1065970255689	-0.301181762471456	no
LOC105195733	whole_body_queen_taiwan	4.60583338486782	2.13337992829912	4.12797937330515	SBSb-virgin-queens-1	taiwan	6.26135930160426	0.710670749053483	no
LOC105195733	whole_body_queen_taiwan	4.60583338486782	2.73539182908669	2.74674976747697	SBSb-virgin-queens-4	taiwan	5.48214159656366	0.00438004380571571	no
LOC105195733	whole_body_queen_taiwan	4.60583338486782	1.90111033002944	1.82841484314254	SBSb-virgin-queens-2	taiwan	3.72952517317198	-0.0366114271590206	no
LOC105195733	whole_body_queen_taiwan	4.60583338486782	1	0	SBSb-virgin-queens-3	taiwan	1	-1	no
LOC105195750	whole_body_queen_taiwan	22.2040216968908	8.53351971319648	14.447927806568	SBSb-virgin-queens-1	taiwan	22.9814475197645	0.696332476032715	no
LOC105195750	whole_body_queen_taiwan	22.2040216968908	13	23	SBSb-virgin-queens-3	taiwan	36	0.777607578663552	no
LOC105195750	whole_body_queen_taiwan	22.2040216968908	10.0297700399845	10.0714158140822	SBSb-virgin-queens-4	taiwan	20.1011858540667	0.00543701349532283	no
LOC105195750	whole_body_queen_taiwan	22.2040216968908	10.4561068151619	10.9704890588553	SBSb-virgin-queens-2	taiwan	21.4265958740172	0.0633652460693624	no
LOC105195766	whole_body_queen_taiwan	17.2990905154373	8.53351971319648	14.447927806568	SBSb-virgin-queens-1	taiwan	22.9814475197645	0.696332476032715	no
LOC105195766	whole_body_queen_taiwan	17.2990905154373	6	9	SBSb-virgin-queens-3	taiwan	15	0.514573172829758	no
LOC105195766	whole_body_queen_taiwan	17.2990905154373	8.20617548726006	4.57791627912829	SBSb-virgin-queens-4	taiwan	12.7840917663883	-0.722875662721827	no
LOC105195766	whole_body_queen_taiwan	17.2990905154373	10.4561068151619	9.14207421571271	SBSb-virgin-queens-2	taiwan	19.5981810308746	-0.175764112636292	no
LOC105195772	whole_body_queen_taiwan	44.0104418168876	25	36	SBSb-virgin-queens-3	taiwan	61	0.509013647487858	no
LOC105195772	whole_body_queen_taiwan	44.0104418168876	31.912904672678	36.6233302330263	SBSb-virgin-queens-4	taiwan	68.5362349057043	0.19297420012702	no
LOC105195772	whole_body_queen_taiwan	44.0104418168876	13.3077723102061	13.7131113235691	SBSb-virgin-queens-2	taiwan	27.0208836337752	0.0403032948869969	no
LOC105195772	whole_body_queen_taiwan	44.0104418168876	10.6668996414956	14.447927806568	SBSb-virgin-queens-1	taiwan	25.1148274480636	0.40499209659418	no
LOC105195781	whole_body_queen_taiwan	16.3371824008023	14.5887564217957	5.49349953495394	SBSb-virgin-queens-4	taiwan	20.0822559567496	-1.26343773994015	no
LOC105195781	whole_body_queen_taiwan	16.3371824008023	14	8	SBSb-virgin-queens-3	taiwan	22	-0.736965594166206	no
LOC105195781	whole_body_queen_taiwan	16.3371824008023	6.40013978489736	6.19196905995772	SBSb-virgin-queens-1	taiwan	12.5921088448551	-0.0411657084252941	no
LOC105195781	whole_body_queen_taiwan	16.3371824008023	8.55499648513248	2.74262226471381	SBSb-virgin-queens-2	taiwan	11.2976187498463	-1.35220589520168	no
LOC105195789	whole_body_queen_taiwan	42.0167691098924	20.059540079969	21.9739981398158	SBSb-virgin-queens-4	taiwan	42.0335382197848	0.125528019567829	no
LOC105195789	whole_body_queen_taiwan	42.0167691098924	20	22	SBSb-virgin-queens-3	taiwan	42	0.131244533278253	no
LOC105195789	whole_body_queen_taiwan	42.0167691098924	23.763879125368	20.112563274568	SBSb-virgin-queens-2	taiwan	43.876442399936	-0.230135575686923	no
LOC105195789	whole_body_queen_taiwan	42.0167691098924	14.9336594980938	8.25595874661029	SBSb-virgin-queens-1	taiwan	23.1896182447041	-0.78362331045788	no
LOC105195797	whole_body_queen_taiwan	3.38948500407863	0.911797276362229	1.83116651165131	SBSb-virgin-queens-4	taiwan	2.74296378801354	0.566467051540207	no
LOC105195797	whole_body_queen_taiwan	3.38948500407863	0.95055516501472	1.82841484314254	SBSb-virgin-queens-2	taiwan	2.77897000815726	0.536108934705382	no
LOC105195797	whole_body_queen_taiwan	3.38948500407863	1	3	SBSb-virgin-queens-3	taiwan	4	1	no
LOC105195797	whole_body_queen_taiwan	3.38948500407863	1.06668996414956	3.09598452997886	SBSb-virgin-queens-1	taiwan	4.16267449412842	0.986888288316849	no
LOC105195826	whole_body_queen_taiwan	32.395523725385	10.0297700399845	15.5649153490362	SBSb-virgin-queens-4	taiwan	25.5946853890207	0.586728118446794	no
LOC105195826	whole_body_queen_taiwan	32.395523725385	8	4	SBSb-virgin-queens-3	taiwan	12	-0.84799690655495	no
LOC105195826	whole_body_queen_taiwan	32.395523725385	20.9122136303238	18.2841484314254	SBSb-virgin-queens-2	taiwan	39.1963620617493	-0.184319797182112	no
LOC105195826	whole_body_queen_taiwan	32.395523725385	34.1340788527859	33.0238349864412	SBSb-virgin-queens-1	taiwan	67.1579138392271	-0.0463253112906917	no
LOC105195859	whole_body_queen_taiwan	8.91097484570235	1	0	SBSb-virgin-queens-3	taiwan	1	-1	no
LOC105195859	whole_body_queen_taiwan	8.91097484570235	12.7651618690712	9.15583255825657	SBSb-virgin-queens-4	taiwan	21.9209944273278	-0.438713060937974	no
LOC105195859	whole_body_queen_taiwan	8.91097484570235	4.7527758250736	10.9704890588553	SBSb-virgin-queens-2	taiwan	15.7232648839289	1.05715193803704	no
LOC105195859	whole_body_queen_taiwan	8.91097484570235	1.06668996414956	1.03199484332629	SBSb-virgin-queens-1	taiwan	2.09868480747585	-0.0244252372222371	no
LOC105196903	whole_body_queen_taiwan	5.55759362248706	1.82359455272446	2.74674976747697	SBSb-virgin-queens-4	taiwan	4.57034432020143	0.408106685094492	no
LOC105196903	whole_body_queen_taiwan	5.55759362248706	3	4	SBSb-virgin-queens-3	taiwan	7	0.321928094887362	no
LOC105196903	whole_body_queen_taiwan	5.55759362248706	2.13337992829912	2.06398968665257	SBSb-virgin-queens-1	taiwan	4.19736961495169	-0.0323082686642103	no
LOC105196903	whole_body_queen_taiwan	5.55759362248706	3.80222066005888	2.74262226471381	SBSb-virgin-queens-2	taiwan	6.54484292477269	-0.359652249037156	no
LOC105196904	whole_body_queen_taiwan	3.38948500407863	2	2	SBSb-virgin-queens-3	taiwan	4	0	no
LOC105196904	whole_body_queen_taiwan	3.38948500407863	1.06668996414956	1.03199484332629	SBSb-virgin-queens-1	taiwan	2.09868480747585	-0.0244252372222371	no
LOC105196904	whole_body_queen_taiwan	3.38948500407863	0.95055516501472	1.82841484314254	SBSb-virgin-queens-2	taiwan	2.77897000815726	0.536108934705382	no
LOC105196904	whole_body_queen_taiwan	3.38948500407863	2.73539182908669	1.83116651165131	SBSb-virgin-queens-4	taiwan	4.566558340738	-0.399862982330147	no
LOC105196907	whole_body_queen_taiwan	18.5315180910246	13	12	SBSb-virgin-queens-3	taiwan	25	-0.106915203916512	no
LOC105196907	whole_body_queen_taiwan	18.5315180910246	8.53351971319648	3.09598452997886	SBSb-virgin-queens-1	taiwan	11.6295042431753	-1.21879867959642	no
LOC105196907	whole_body_queen_taiwan	18.5315180910246	13.3077723102061	5.48524452942763	SBSb-virgin-queens-2	taiwan	18.7930168396337	-1.1415661868305	no
LOC105196907	whole_body_queen_taiwan	18.5315180910246	10.0297700399845	8.24024930243092	SBSb-virgin-queens-4	taiwan	18.2700193424154	-0.255399031179405	no
LOC105196908	whole_body_queen_taiwan	1.84607155938694	0.95055516501472	0.914207421571271	SBSb-virgin-queens-2	taiwan	1.86476258658599	-0.0271376335436875	no
LOC105196908	whole_body_queen_taiwan	1.84607155938694	1	1	SBSb-virgin-queens-3	taiwan	2	0	no
LOC105196908	whole_body_queen_taiwan	1.84607155938694	1.06668996414956	0	SBSb-virgin-queens-1	taiwan	1.06668996414956	-1.04732197815267	no
LOC105196908	whole_body_queen_taiwan	1.84607155938694	0.911797276362229	0.915583255825657	SBSb-virgin-queens-4	taiwan	1.82738053218789	0.002854179526889	no
LOC105196909	whole_body_queen_taiwan	44.7484739623961	21.3337992829912	20.6398968665257	SBSb-virgin-queens-1	taiwan	41.9736961495169	-0.0455350706360903	no
LOC105196909	whole_body_queen_taiwan	44.7484739623961	17	22	SBSb-virgin-queens-3	taiwan	39	0.3536369546147	no
LOC105196909	whole_body_queen_taiwan	44.7484739623961	30.4177652804711	32.9114671765658	SBSb-virgin-queens-2	taiwan	63.3292324570368	0.110192637201885	no
LOC105196909	whole_body_queen_taiwan	44.7484739623961	20.9713373563313	26.5519144189441	SBSb-virgin-queens-4	taiwan	47.5232517752753	0.326529879869827	no
LOC105196910	whole_body_queen_taiwan	6.6800803381867	1.06668996414956	2.06398968665257	SBSb-virgin-queens-1	taiwan	3.13067965080213	0.568089463026571	no
LOC105196910	whole_body_queen_taiwan	6.6800803381867	1	3	SBSb-virgin-queens-3	taiwan	4	1	no
LOC105196910	whole_body_queen_taiwan	6.6800803381867	5.70333099008832	3.65682968628509	SBSb-virgin-queens-2	taiwan	9.36016067637341	-0.525530051897344	no
LOC105196910	whole_body_queen_taiwan	6.6800803381867	4.55898638181115	7.32466604660526	SBSb-virgin-queens-4	taiwan	11.8836524284164	0.582570550168889	no
LOC105199287	whole_body_queen_taiwan	50.347771877627	37	27	SBSb-virgin-queens-3	taiwan	64	-0.440572591385981	no
LOC105199287	whole_body_queen_taiwan	50.347771877627	21.3337992829912	20.6398968665257	SBSb-virgin-queens-1	taiwan	41.9736961495169	-0.0455350706360903	no
LOC105199287	whole_body_queen_taiwan	50.347771877627	29.4672101154563	29.2546374902807	SBSb-virgin-queens-2	taiwan	58.721847605737	-0.0101010999197677	no
LOC105199287	whole_body_queen_taiwan	50.347771877627	31.0011073963158	0.915583255825657	SBSb-virgin-queens-4	taiwan	31.9166906521414	-4.06226619513701	no
LOC105199288	whole_body_queen_taiwan	5.52358881244048	4.26675985659824	2.06398968665257	SBSb-virgin-queens-1	taiwan	6.33074954325081	-0.781504238629094	no
LOC105199288	whole_body_queen_taiwan	5.52358881244048	6	1	SBSb-virgin-queens-3	taiwan	7	-1.8073549220576	no
LOC105199288	whole_body_queen_taiwan	5.52358881244048	1.82359455272446	0	SBSb-virgin-queens-4	taiwan	1.82359455272446	-1.49753294315298	no
LOC105199288	whole_body_queen_taiwan	5.52358881244048	3.80222066005888	0.914207421571271	SBSb-virgin-queens-2	taiwan	4.71642808163015	-1.32695452907041	no
LOC105199289	whole_body_queen_taiwan	16.2019090730762	11.7335896056452	6.19196905995772	SBSb-virgin-queens-1	taiwan	17.9255586656029	-0.824180453603262	no
LOC105199289	whole_body_queen_taiwan	16.2019090730762	11.4066619801766	5.48524452942763	SBSb-virgin-queens-2	taiwan	16.8919065096043	-0.935882131550725	no
LOC105199289	whole_body_queen_taiwan	16.2019090730762	8	3	SBSb-virgin-queens-3	taiwan	11	-1.16992500144231	no
LOC105199289	whole_body_queen_taiwan	16.2019090730762	12.7651618690712	2.74674976747697	SBSb-virgin-queens-4	taiwan	15.5119116365482	-1.87731004179917	no
LOC105199290	whole_body_queen_taiwan	17.5720151328286	13.6769591454334	2.74674976747697	SBSb-virgin-queens-4	taiwan	16.4237089129104	-1.96984156014552	no
LOC105199290	whole_body_queen_taiwan	17.5720151328286	12.8002795697947	9.28795358993658	SBSb-virgin-queens-1	taiwan	22.0882331597313	-0.423741454164765	no
LOC105199290	whole_body_queen_taiwan	17.5720151328286	11.4066619801766	7.31365937257017	SBSb-virgin-queens-2	taiwan	18.7203213527468	-0.57755946555896	no
LOC105199290	whole_body_queen_taiwan	17.5720151328286	8	3	SBSb-virgin-queens-3	taiwan	11	-1.16992500144231	no
LOC105199292	whole_body_queen_taiwan	46.3768913428375	20	24	SBSb-virgin-queens-3	taiwan	44	0.251538766995964	no
LOC105199292	whole_body_queen_taiwan	46.3768913428375	23.4671792112903	22.7038865531783	SBSb-virgin-queens-1	taiwan	46.1710657644686	-0.0457241579138076	no
LOC105199292	whole_body_queen_taiwan	46.3768913428375	22.8133239603533	23.7693929608531	SBSb-virgin-queens-2	taiwan	46.5827169212063	0.0567895000896305	no
LOC105199292	whole_body_queen_taiwan	46.3768913428375	21.8831346326935	26.5519144189441	SBSb-virgin-queens-4	taiwan	48.4350490516376	0.267867874209487	no
LOC105199293	whole_body_queen_taiwan	26.1587988090046	16	9	SBSb-virgin-queens-3	taiwan	25	-0.765534746362977	no
LOC105199293	whole_body_queen_taiwan	26.1587988090046	9.5055516501472	2.74262226471381	SBSb-virgin-queens-2	taiwan	12.248173914861	-1.48903056800608	no
LOC105199293	whole_body_queen_taiwan	26.1587988090046	13.6769591454334	21.9739981398158	SBSb-virgin-queens-4	taiwan	35.6509572852492	0.646448855702497	no
LOC105199293	whole_body_queen_taiwan	26.1587988090046	14.9336594980938	12.3839381199154	SBSb-virgin-queens-1	taiwan	27.3175976180093	-0.251574969740224	no
LOC105199295	whole_body_queen_taiwan	203.814433607303	157.792157392444	76.7934234119868	SBSb-virgin-queens-2	taiwan	234.58558080443	-1.02941955947636	taiwan
LOC105199295	whole_body_queen_taiwan	203.814433607303	155.005536981579	36.6233302330263	SBSb-virgin-queens-4	taiwan	191.628867214605	-2.05189777450553	taiwan
LOC105199295	whole_body_queen_taiwan	203.814433607303	169	47	SBSb-virgin-queens-3	taiwan	216	-1.82442843541655	taiwan
LOC105199295	whole_body_queen_taiwan	203.814433607303	142.936455196041	45.4077731063566	SBSb-virgin-queens-1	taiwan	188.344228302398	-1.63299365779874	taiwan
LOC105199296	whole_body_queen_taiwan	24.8624020578997	10.0297700399845	13.7337488373849	SBSb-virgin-queens-4	taiwan	23.7635188773694	0.417721842227661	no
LOC105199296	whole_body_queen_taiwan	24.8624020578997	9.5055516501472	16.4557335882829	SBSb-virgin-queens-2	taiwan	25.9612852384301	0.732549067924331	no
LOC105199296	whole_body_queen_taiwan	24.8624020578997	7	11	SBSb-virgin-queens-3	taiwan	18	0.584962500721156	no
LOC105199296	whole_body_queen_taiwan	24.8624020578997	8.53351971319648	25.7998710831572	SBSb-virgin-queens-1	taiwan	34.3333907963536	1.4911452096486	no
LOC105199297	whole_body_queen_taiwan	3.36476258658599	1.90111033002944	1.82841484314254	SBSb-virgin-queens-2	taiwan	3.72952517317198	-0.0366114271590206	no
LOC105199297	whole_body_queen_taiwan	3.36476258658599	1	2	SBSb-virgin-queens-3	taiwan	3	0.584962500721156	no
LOC105199297	whole_body_queen_taiwan	3.36476258658599	9.60020967734603	6.19196905995772	SBSb-virgin-queens-1	taiwan	15.7921787373038	-0.559634082820271	no
LOC105199297	whole_body_queen_taiwan	3.36476258658599	0.911797276362229	1.83116651165131	SBSb-virgin-queens-4	taiwan	2.74296378801354	0.566467051540207	no
LOC105199298	whole_body_queen_taiwan	2.77793569720261	5.3334498207478	2.06398968665257	SBSb-virgin-queens-1	taiwan	7.39743950740037	-1.04758010642787	no
LOC105199298	whole_body_queen_taiwan	2.77793569720261	1.90111033002944	0	SBSb-virgin-queens-2	taiwan	1.90111033002944	-1.53660516267125	no
LOC105199298	whole_body_queen_taiwan	2.77793569720261	1.82359455272446	1.83116651165131	SBSb-virgin-queens-4	taiwan	3.65476106437577	0.00386365895862898	no
LOC105199298	whole_body_queen_taiwan	2.77793569720261	0	0	SBSb-virgin-queens-3	taiwan	0	0	no
LOC105199299	whole_body_queen_taiwan	17.9525018005731	10.9415673163467	9.15583255825657	SBSb-virgin-queens-4	taiwan	20.0973998746033	-0.233683686797426	no
LOC105199299	whole_body_queen_taiwan	17.9525018005731	5.3334498207478	3.09598452997886	SBSb-virgin-queens-1	taiwan	8.42943435072666	-0.628781281137595	no
LOC105199299	whole_body_queen_taiwan	17.9525018005731	12	8	SBSb-virgin-queens-3	taiwan	20	-0.53051471669878	no
LOC105199299	whole_body_queen_taiwan	17.9525018005731	9.5055516501472	6.3994519509989	SBSb-virgin-queens-2	taiwan	15.9050036011461	-0.505661595487414	no
LOC105199300	whole_body_queen_taiwan	48.2775913013423	30	30	SBSb-virgin-queens-3	taiwan	60	0	no
LOC105199300	whole_body_queen_taiwan	48.2775913013423	16.4123509745201	20.1428316281645	SBSb-virgin-queens-4	taiwan	36.5551826026846	0.280057602254591	no
LOC105199300	whole_body_queen_taiwan	48.2775913013423	13.8669695339443	21.671891709852	SBSb-virgin-queens-1	taiwan	35.5388612437963	0.608794172436149	no
LOC105199300	whole_body_queen_taiwan	48.2775913013423	31.3683204454858	31.0830523334232	SBSb-virgin-queens-2	taiwan	62.451372778909	-0.0127711035586691	no
LOC105199302	whole_body_queen_taiwan	29.2916637253152	14	19	SBSb-virgin-queens-3	taiwan	33	0.415037499278844	no
LOC105199302	whole_body_queen_taiwan	29.2916637253152	12.7651618690712	12.8181655815592	SBSb-virgin-queens-4	taiwan	25.5833274506304	0.00554452956493707	no
LOC105199302	whole_body_queen_taiwan	29.2916637253152	10.6668996414956	10.3199484332629	SBSb-virgin-queens-1	taiwan	20.9868480747585	-0.0435538444654626	no
LOC105199302	whole_body_queen_taiwan	29.2916637253152	19.9616584653091	21.9409781177105	SBSb-virgin-queens-2	taiwan	41.9026365830196	0.13017403782877	no
LOC105199303	whole_body_queen_taiwan	49.09505729594	27.7339390678885	24.7678762398309	SBSb-virgin-queens-1	taiwan	52.5018153077194	-0.157182145335706	no
LOC105199303	whole_body_queen_taiwan	49.09505729594	24.7144342903827	29.2546374902807	SBSb-virgin-queens-2	taiwan	53.9690717806634	0.234577883273952	no
LOC105199303	whole_body_queen_taiwan	49.09505729594	22	20	SBSb-virgin-queens-3	taiwan	42	-0.131244533278253	no
LOC105199303	whole_body_queen_taiwan	49.09505729594	21.8831346326935	23.8051646514671	SBSb-virgin-queens-4	taiwan	45.6882992841606	0.116355841186476	no
LOC105199304	whole_body_queen_taiwan	45.374614878168	20	11	SBSb-virgin-queens-3	taiwan	31	-0.807354922057604	no
LOC105199304	whole_body_queen_taiwan	45.374614878168	36.267458781085	50.567747322988	SBSb-virgin-queens-1	taiwan	86.8352061040731	0.468552577513649	no
LOC105199304	whole_body_queen_taiwan	45.374614878168	12.7651618690712	18.3116651165131	SBSb-virgin-queens-4	taiwan	31.0768269855844	0.488450988495817	no
LOC105199304	whole_body_queen_taiwan	45.374614878168	30.4177652804711	29.2546374902807	SBSb-virgin-queens-2	taiwan	59.6724027707517	-0.0544242681146	no
LOC105199305	whole_body_queen_taiwan	1.91179727636223	1.06668996414956	1.03199484332629	SBSb-virgin-queens-1	taiwan	2.09868480747585	-0.0244252372222371	no
LOC105199305	whole_body_queen_taiwan	1.91179727636223	1.82359455272446	0	SBSb-virgin-queens-4	taiwan	1.82359455272446	-1.49753294315298	no
LOC105199305	whole_body_queen_taiwan	1.91179727636223	2	0	SBSb-virgin-queens-3	taiwan	2	-1.58496250072116	no
LOC105199305	whole_body_queen_taiwan	1.91179727636223	0.95055516501472	0	SBSb-virgin-queens-2	taiwan	0.95055516501472	-0.963884800806843	no
LOC105199307	whole_body_queen_taiwan	14.789334345803	14.2583274752208	10.056281637284	SBSb-virgin-queens-2	taiwan	24.3146091125048	-0.464730560250476	no
LOC105199307	whole_body_queen_taiwan	14.789334345803	14.5887564217957	11.9025823257335	SBSb-virgin-queens-4	taiwan	26.4913387475292	-0.272846007145202	no
LOC105199307	whole_body_queen_taiwan	14.789334345803	3.20006989244868	2.06398968665257	SBSb-virgin-queens-1	taiwan	5.26405957910125	-0.455001894485993	no
LOC105199307	whole_body_queen_taiwan	14.789334345803	1	2	SBSb-virgin-queens-3	taiwan	3	0.584962500721156	no
LOC105199309	whole_body_queen_taiwan	3.36958890427506	8.53351971319648	7.22396390328401	SBSb-virgin-queens-1	taiwan	15.7574836164805	-0.213175013813752	no
LOC105199309	whole_body_queen_taiwan	3.36958890427506	0.95055516501472	0.914207421571271	SBSb-virgin-queens-2	taiwan	1.86476258658599	-0.0271376335436875	no
LOC105199309	whole_body_queen_taiwan	3.36958890427506	1.82359455272446	0.915583255825657	SBSb-virgin-queens-4	taiwan	2.73917780855012	-0.559749213054689	no
LOC105199309	whole_body_queen_taiwan	3.36958890427506	2	2	SBSb-virgin-queens-3	taiwan	4	0	no
LOC105199310	whole_body_queen_taiwan	55.5024798418606	31.0011073963158	24.7207479072928	SBSb-virgin-queens-4	taiwan	55.7218553036085	-0.315189236420241	no
LOC105199310	whole_body_queen_taiwan	55.5024798418606	35.1705411055447	20.112563274568	SBSb-virgin-queens-2	taiwan	55.2831043801126	-0.776713433838654	no
LOC105199310	whole_body_queen_taiwan	55.5024798418606	46.9343584225806	28.895855613136	SBSb-virgin-queens-1	taiwan	75.8302140357166	-0.68111462157843	no
LOC105199310	whole_body_queen_taiwan	55.5024798418606	33	19	SBSb-virgin-queens-3	taiwan	52	-0.765534746362977	no
LOC105199311	whole_body_queen_taiwan	61.8325839701312	36.4718910544892	27.4674976747697	SBSb-virgin-queens-4	taiwan	63.9393887292589	-0.396493102348261	no
LOC105199311	whole_body_queen_taiwan	61.8325839701312	37.0716514355741	31.0830523334232	SBSb-virgin-queens-2	taiwan	68.1547037689973	-0.246905746936744	no
LOC105199311	whole_body_queen_taiwan	61.8325839701312	34	25	SBSb-virgin-queens-3	taiwan	59	-0.428843298803874	no
LOC105199311	whole_body_queen_taiwan	61.8325839701312	27.7339390678885	31.9918401431149	SBSb-virgin-queens-1	taiwan	59.7257792110034	0.199353465392694	no
LOC105199313	whole_body_queen_taiwan	94.8498828991848	0.95055516501472	1.82841484314254	SBSb-virgin-queens-2	taiwan	2.77897000815726	0.536108934705382	no
LOC105199313	whole_body_queen_taiwan	94.8498828991848	29	14	SBSb-virgin-queens-3	taiwan	43	-1	no
LOC105199313	whole_body_queen_taiwan	94.8498828991848	68.2681577055718	78.4316080927978	SBSb-virgin-queens-1	taiwan	146.69976579837	0.197520907328385	no
LOC105199313	whole_body_queen_taiwan	94.8498828991848	82.9735521489628	82.4024930243092	SBSb-virgin-queens-4	taiwan	165.376045173272	-0.00984450747561575	no
LOC105199314	whole_body_queen_taiwan	6.76587291661543	5.70333099008832	1.82841484314254	SBSb-virgin-queens-2	taiwan	7.53174583323086	-1.24488443598269	no
LOC105199314	whole_body_queen_taiwan	6.76587291661543	5	1	SBSb-virgin-queens-3	taiwan	6	-1.58496250072116	no
LOC105199314	whole_body_queen_taiwan	6.76587291661543	5.47078365817337	2.74674976747697	SBSb-virgin-queens-4	taiwan	8.21753342565035	-0.788300815237241	no
LOC105199314	whole_body_queen_taiwan	6.76587291661543	4.26675985659824	1.03199484332629	SBSb-virgin-queens-1	taiwan	5.29875469992452	-1.3740189388779	no
LOC105199315	whole_body_queen_taiwan	11.1471891054489	5.70333099008832	0	SBSb-virgin-queens-2	taiwan	5.70333099008832	-2.74487817149492	taiwan
LOC105199315	whole_body_queen_taiwan	11.1471891054489	17.067039426393	0	SBSb-virgin-queens-1	taiwan	17.067039426393	-4.17528821178193	taiwan
LOC105199315	whole_body_queen_taiwan	11.1471891054489	14	1	SBSb-virgin-queens-3	taiwan	15	-2.90689059560852	taiwan
LOC105199315	whole_body_queen_taiwan	11.1471891054489	7.29437821089783	0	SBSb-virgin-queens-4	taiwan	7.29437821089783	-3.05213383342018	taiwan
LOC105199316	whole_body_queen_taiwan	7.41369026609394	0.911797276362229	0.915583255825657	SBSb-virgin-queens-4	taiwan	1.82738053218789	0.002854179526889	no
LOC105199316	whole_body_queen_taiwan	7.41369026609394	9.5055516501472	5.48524452942763	SBSb-virgin-queens-2	taiwan	14.9907961795748	-0.695919042253178	no
LOC105199316	whole_body_queen_taiwan	7.41369026609394	0	1.03199484332629	SBSb-virgin-queens-1	taiwan	1.03199484332629	1.02289674093044	no
LOC105199316	whole_body_queen_taiwan	7.41369026609394	11	2	SBSb-virgin-queens-3	taiwan	13	-2	no
LOC105199317	whole_body_queen_taiwan	2.04934240373792	1	1	SBSb-virgin-queens-3	taiwan	2	0	no
LOC105199317	whole_body_queen_taiwan	2.04934240373792	4.55898638181115	2.74674976747697	SBSb-virgin-queens-4	taiwan	7.30573614928812	-0.56918221958493	no
LOC105199317	whole_body_queen_taiwan	2.04934240373792	1.06668996414956	1.03199484332629	SBSb-virgin-queens-1	taiwan	2.09868480747585	-0.0244252372222371	no
LOC105199317	whole_body_queen_taiwan	2.04934240373792	0.95055516501472	0	SBSb-virgin-queens-2	taiwan	0.95055516501472	-0.963884800806843	no
LOC105199318	whole_body_queen_taiwan	23.8376580768658	10.9415673163467	13.7337488373849	SBSb-virgin-queens-4	taiwan	24.6753161537316	0.303132353658407	no
LOC105199318	whole_body_queen_taiwan	23.8376580768658	10	13	SBSb-virgin-queens-3	taiwan	23	0.347923303420307	no
LOC105199318	whole_body_queen_taiwan	23.8376580768658	6.40013978489736	9.28795358993658	SBSb-virgin-queens-1	taiwan	15.6880933748339	0.475331611749739	no
LOC105199318	whole_body_queen_taiwan	23.8376580768658	13.3077723102061	14.6273187451403	SBSb-virgin-queens-2	taiwan	27.9350910553464	0.127271204393362	no
LOC105199319	whole_body_queen_taiwan	47.8146091125048	27	20	SBSb-virgin-queens-3	taiwan	47	-0.415037499278844	no
LOC105199319	whole_body_queen_taiwan	47.8146091125048	22.7949319090557	21.9739981398158	SBSb-virgin-queens-4	taiwan	44.7689300488715	-0.0506523769184183	no
LOC105199319	whole_body_queen_taiwan	47.8146091125048	28.5166549504416	20.112563274568	SBSb-virgin-queens-2	taiwan	48.6292182250096	-0.483427486793519	no
LOC105199319	whole_body_queen_taiwan	47.8146091125048	36.267458781085	35.0878246730937	SBSb-virgin-queens-1	taiwan	71.3552834541788	-0.0464042648620086	no
LOC105199320	whole_body_queen_taiwan	2.77724778007541	1.90111033002944	0.914207421571271	SBSb-virgin-queens-2	taiwan	2.81531775160071	-0.59985799540809	no
LOC105199320	whole_body_queen_taiwan	2.77724778007541	1	1	SBSb-virgin-queens-3	taiwan	2	0	no
LOC105199320	whole_body_queen_taiwan	2.77724778007541	1.06668996414956	2.06398968665257	SBSb-virgin-queens-1	taiwan	3.13067965080213	0.568089463026571	no
LOC105199320	whole_body_queen_taiwan	2.77724778007541	1.82359455272446	0.915583255825657	SBSb-virgin-queens-4	taiwan	2.73917780855012	-0.559749213054689	no
LOC105199321	whole_body_queen_taiwan	7.20264840565809	2.13337992829912	8.25595874661029	SBSb-virgin-queens-1	taiwan	10.3893386749094	1.5626627245897	taiwan
LOC105199321	whole_body_queen_taiwan	7.20264840565809	0.911797276362229	5.49349953495394	SBSb-virgin-queens-4	taiwan	6.40529681131617	1.76406664737829	taiwan
LOC105199321	whole_body_queen_taiwan	7.20264840565809	0	8	SBSb-virgin-queens-3	taiwan	8	3.16992500144231	taiwan
LOC105199321	whole_body_queen_taiwan	7.20264840565809	0	6.3994519509989	SBSb-virgin-queens-2	taiwan	6.3994519509989	2.88741841981508	taiwan
LOC105199322	whole_body_queen_taiwan	1.96303266983187	0.911797276362229	0.915583255825657	SBSb-virgin-queens-4	taiwan	1.82738053218789	0.002854179526889	no
LOC105199322	whole_body_queen_taiwan	1.96303266983187	1.06668996414956	1.03199484332629	SBSb-virgin-queens-1	taiwan	2.09868480747585	-0.0244252372222371	no
LOC105199322	whole_body_queen_taiwan	1.96303266983187	0	0.914207421571271	SBSb-virgin-queens-2	taiwan	0.914207421571271	0.936747167263155	no
LOC105199322	whole_body_queen_taiwan	1.96303266983187	1	2	SBSb-virgin-queens-3	taiwan	3	0.584962500721156	no
LOC105199323	whole_body_queen_taiwan	4.28138618063729	4.26675985659824	2.06398968665257	SBSb-virgin-queens-1	taiwan	6.33074954325081	-0.781504238629094	no
LOC105199323	whole_body_queen_taiwan	4.28138618063729	3.64718910544892	0.915583255825657	SBSb-virgin-queens-4	taiwan	4.56277236127457	-1.27857462272159	no
LOC105199323	whole_body_queen_taiwan	4.28138618063729	1.90111033002944	1.82841484314254	SBSb-virgin-queens-2	taiwan	3.72952517317198	-0.0366114271590206	no
LOC105199323	whole_body_queen_taiwan	4.28138618063729	3	1	SBSb-virgin-queens-3	taiwan	4	-1	no
LOC105199325	whole_body_queen_taiwan	3.40628193853716	3.64718910544892	0	SBSb-virgin-queens-4	taiwan	3.64718910544892	-2.21635835281989	no
LOC105199325	whole_body_queen_taiwan	3.40628193853716	4.7527758250736	0.914207421571271	SBSb-virgin-queens-2	taiwan	5.66698324664487	-1.58751108492389	no
LOC105199325	whole_body_queen_taiwan	3.40628193853716	2.13337992829912	1.03199484332629	SBSb-virgin-queens-1	taiwan	3.16537477162541	-0.624822968913018	no
LOC105199325	whole_body_queen_taiwan	3.40628193853716	1	0	SBSb-virgin-queens-3	taiwan	1	-1	no
LOC105199326	whole_body_queen_taiwan	26.0427664411172	5.70333099008832	9.14207421571271	SBSb-virgin-queens-2	taiwan	14.845405205801	0.597402660023506	no
LOC105199326	whole_body_queen_taiwan	26.0427664411172	8.20617548726006	21.0584148839901	SBSb-virgin-queens-4	taiwan	29.2645903712502	1.26065527424342	no
LOC105199326	whole_body_queen_taiwan	26.0427664411172	11	18	SBSb-virgin-queens-3	taiwan	29	0.662965012722429	no
LOC105199326	whole_body_queen_taiwan	26.0427664411172	11.7335896056452	11.3519432765892	SBSb-virgin-queens-1	taiwan	23.0855328822343	-0.0439011405748932	no
LOC105199327	whole_body_queen_taiwan	37.9297260186387	18.0605481352797	12.7989039019978	SBSb-virgin-queens-2	taiwan	30.8594520372775	-0.466035935316986	no
LOC105199327	whole_body_queen_taiwan	37.9297260186387	21	24	SBSb-virgin-queens-3	taiwan	45	0.184424571137428	no
LOC105199327	whole_body_queen_taiwan	37.9297260186387	18.1337293905425	11.3519432765892	SBSb-virgin-queens-1	taiwan	29.4856726671317	-0.631380066953378	no
LOC105199327	whole_body_queen_taiwan	37.9297260186387	26.4421210145046	28.3830809305954	SBSb-virgin-queens-4	taiwan	54.8252019451	0.0985936836235619	no
LOC105199328	whole_body_queen_taiwan	59.7489370413561	37.0716514355741	27.4262226471381	SBSb-virgin-queens-2	taiwan	64.4978740827122	-0.421494748541595	no
LOC105199328	whole_body_queen_taiwan	59.7489370413561	20	35	SBSb-virgin-queens-3	taiwan	55	0.777607578663552	no
LOC105199328	whole_body_queen_taiwan	59.7489370413561	32.8247019490402	56.7661618611908	SBSb-virgin-queens-4	taiwan	89.590863810231	0.772147419578068	no
LOC105199328	whole_body_queen_taiwan	59.7489370413561	21.3337992829912	27.8638607698097	SBSb-virgin-queens-1	taiwan	49.1976600528009	0.370035590531132	no
LOC105199329	whole_body_queen_taiwan	14.364762586586	13	12	SBSb-virgin-queens-3	taiwan	25	-0.106915203916512	no
LOC105199329	whole_body_queen_taiwan	14.364762586586	1.90111033002944	1.82841484314254	SBSb-virgin-queens-2	taiwan	3.72952517317198	-0.0366114271590206	no
LOC105199329	whole_body_queen_taiwan	14.364762586586	23.4671792112903	12.3839381199154	SBSb-virgin-queens-1	taiwan	35.8511173312057	-0.870345104338994	no
LOC105199329	whole_body_queen_taiwan	14.364762586586	1.82359455272446	1.83116651165131	SBSb-virgin-queens-4	taiwan	3.65476106437577	0.00386365895862898	no
LOC105199330	whole_body_queen_taiwan	25.6394487842843	18.1337293905425	10.3199484332629	SBSb-virgin-queens-1	taiwan	28.4536778238054	-0.757250713295986	no
LOC105199330	whole_body_queen_taiwan	25.6394487842843	15.5005536981579	7.32466604660526	SBSb-virgin-queens-4	taiwan	22.8252197447632	-0.987050133731928	no
LOC105199330	whole_body_queen_taiwan	25.6394487842843	22.8133239603533	6.3994519509989	SBSb-virgin-queens-2	taiwan	29.2127759113522	-1.68627868696223	no
LOC105199330	whole_body_queen_taiwan	25.6394487842843	10	6	SBSb-virgin-queens-3	taiwan	16	-0.652076696579693	no
LOC105199332	whole_body_queen_taiwan	53.4106484567192	15.5005536981579	33.8765804655493	SBSb-virgin-queens-4	taiwan	49.3771341637072	1.07974415868081	no
LOC105199332	whole_body_queen_taiwan	53.4106484567192	14	22	SBSb-virgin-queens-3	taiwan	36	0.616671360448494	no
LOC105199332	whole_body_queen_taiwan	53.4106484567192	37.3341487452346	53.6637318529669	SBSb-virgin-queens-1	taiwan	90.9978805982015	0.511953811495159	no
LOC105199332	whole_body_queen_taiwan	53.4106484567192	19.9616584653091	37.4825042844221	SBSb-virgin-queens-2	taiwan	57.4441627497313	0.876449820901989	no
LOC105199334	whole_body_queen_taiwan	1.932381293293	1	1	SBSb-virgin-queens-3	taiwan	2	0	no
LOC105199334	whole_body_queen_taiwan	1.932381293293	0.911797276362229	0.915583255825657	SBSb-virgin-queens-4	taiwan	1.82738053218789	0.002854179526889	no
LOC105199334	whole_body_queen_taiwan	1.932381293293	0.95055516501472	0.914207421571271	SBSb-virgin-queens-2	taiwan	1.86476258658599	-0.0271376335436875	no
LOC105199334	whole_body_queen_taiwan	1.932381293293	1.06668996414956	1.03199484332629	SBSb-virgin-queens-1	taiwan	2.09868480747585	-0.0244252372222371	no
LOC105199335	whole_body_queen_taiwan	3.38948500407863	2	2	SBSb-virgin-queens-3	taiwan	4	0	no
LOC105199335	whole_body_queen_taiwan	3.38948500407863	1.82359455272446	0	SBSb-virgin-queens-4	taiwan	1.82359455272446	-1.49753294315298	no
LOC105199335	whole_body_queen_taiwan	3.38948500407863	2.13337992829912	3.09598452997886	SBSb-virgin-queens-1	taiwan	5.22936445827798	0.386490556626067	no
LOC105199335	whole_body_queen_taiwan	3.38948500407863	0.95055516501472	1.82841484314254	SBSb-virgin-queens-2	taiwan	2.77897000815726	0.536108934705382	no
LOC105199336	whole_body_queen_taiwan	146.808403310661	76.9949683661924	78.6218382551293	SBSb-virgin-queens-2	taiwan	155.616806621322	0.029783124360824	no
LOC105199336	whole_body_queen_taiwan	146.808403310661	80.2381603198762	92.4739088383914	SBSb-virgin-queens-4	taiwan	172.712069158268	0.202406155545604	no
LOC105199336	whole_body_queen_taiwan	146.808403310661	68	70	SBSb-virgin-queens-3	taiwan	138	0.0412226627265129	no
LOC105199336	whole_body_queen_taiwan	146.808403310661	54.4011881716275	43.343783419704	SBSb-virgin-queens-1	taiwan	97.7449715913316	-0.321185051165949	no
LOC105199337	whole_body_queen_taiwan	31.7027406577486	11.7335896056452	21.671891709852	SBSb-virgin-queens-1	taiwan	33.4054813154972	0.832265599419363	no
LOC105199337	whole_body_queen_taiwan	31.7027406577486	10.4561068151619	12.7989039019978	SBSb-virgin-queens-2	taiwan	23.2550107171597	0.2684368236813	no
LOC105199337	whole_body_queen_taiwan	31.7027406577486	26.4421210145046	20.1428316281645	SBSb-virgin-queens-4	taiwan	46.5849526426691	-0.376223384728619	no
LOC105199337	whole_body_queen_taiwan	31.7027406577486	12	18	SBSb-virgin-queens-3	taiwan	30	0.547487795302493	no
LOC105199338	whole_body_queen_taiwan	29.6948440685764	14.5887564217957	22.8895813956414	SBSb-virgin-queens-4	taiwan	37.4783378174371	0.615875731439603	no
LOC105199338	whole_body_queen_taiwan	29.6948440685764	18.1337293905425	8.25595874661029	SBSb-virgin-queens-1	taiwan	26.3896881371528	-1.04766375990185	no
LOC105199338	whole_body_queen_taiwan	29.6948440685764	9.5055516501472	15.5415261667116	SBSb-virgin-queens-2	taiwan	25.0470778168588	0.654940427248325	no
LOC105199338	whole_body_queen_taiwan	29.6948440685764	14	19	SBSb-virgin-queens-3	taiwan	33	0.415037499278844	no
LOC105199339	whole_body_queen_taiwan	2.37131113235691	2.13337992829912	2.06398968665257	SBSb-virgin-queens-1	taiwan	4.19736961495169	-0.0323082686642103	no
LOC105199339	whole_body_queen_taiwan	2.37131113235691	0	1.83116651165131	SBSb-virgin-queens-4	taiwan	1.83116651165131	1.50139660211161	no
LOC105199339	whole_body_queen_taiwan	2.37131113235691	0	2.74262226471381	SBSb-virgin-queens-2	taiwan	2.74262226471381	1.90404944729641	no
LOC105199339	whole_body_queen_taiwan	2.37131113235691	1	1	SBSb-virgin-queens-3	taiwan	2	0	no
LOC105199340	whole_body_queen_taiwan	29.9867401720464	17.3241482508824	14.6493320932105	SBSb-virgin-queens-4	taiwan	31.9734803440929	-0.227645055224151	no
LOC105199340	whole_body_queen_taiwan	29.9867401720464	15.2088826402355	19.1983558529967	SBSb-virgin-queens-2	taiwan	34.4072384932322	0.317453220258942	no
LOC105199340	whole_body_queen_taiwan	29.9867401720464	16	12	SBSb-virgin-queens-3	taiwan	28	-0.387023123109247	no
LOC105199340	whole_body_queen_taiwan	29.9867401720464	7.46682974904692	9.28795358993658	SBSb-virgin-queens-1	taiwan	16.7547833389835	0.281062254875425	no
LOC105199341	whole_body_queen_taiwan	4.39931153825648	49.4288685807655	13.7131113235691	SBSb-virgin-queens-2	taiwan	63.1419799043345	-1.7771474975548	no
LOC105199341	whole_body_queen_taiwan	4.39931153825648	2.73539182908669	1.83116651165131	SBSb-virgin-queens-4	taiwan	4.566558340738	-0.399862982330147	no
LOC105199341	whole_body_queen_taiwan	4.39931153825648	2	0	SBSb-virgin-queens-3	taiwan	2	-1.58496250072116	no
LOC105199341	whole_body_queen_taiwan	4.39931153825648	3.20006989244868	1.03199484332629	SBSb-virgin-queens-1	taiwan	4.23206473577496	-1.0475165947348	no
LOC105199342	whole_body_queen_taiwan	37.2935240945158	13.3077723102061	20.112563274568	SBSb-virgin-queens-2	taiwan	33.4203355847741	0.561302681812481	no
LOC105199342	whole_body_queen_taiwan	37.2935240945158	19.2004193546921	20.6398968665257	SBSb-virgin-queens-1	taiwan	39.8403162212178	0.0993083802406608	no
LOC105199342	whole_body_queen_taiwan	37.2935240945158	17	25	SBSb-virgin-queens-3	taiwan	42	0.53051471669878	no
LOC105199342	whole_body_queen_taiwan	37.2935240945158	10.9415673163467	23.8051646514671	SBSb-virgin-queens-4	taiwan	34.7467319678138	1.05464833254996	no
LOC105199343	whole_body_queen_taiwan	53.4970177167244	26.6155446204122	32.9114671765658	SBSb-virgin-queens-2	taiwan	59.5270117969779	0.296292623961091	no
LOC105199343	whole_body_queen_taiwan	53.4970177167244	26.4421210145046	26.5519144189441	SBSb-virgin-queens-4	taiwan	52.9940354334487	0.00576057418991178	no
LOC105199343	whole_body_queen_taiwan	53.4970177167244	14.9336594980938	16.5119174932206	SBSb-virgin-queens-1	taiwan	31.4455769913144	0.136259412437218	no
LOC105199343	whole_body_queen_taiwan	53.4970177167244	28	26	SBSb-virgin-queens-3	taiwan	54	-0.103093492964104	no
LOC105199345	whole_body_queen_taiwan	56.2019377352255	23	27	SBSb-virgin-queens-3	taiwan	50	0.222392421336448	no
LOC105199345	whole_body_queen_taiwan	56.2019377352255	20.9713373563313	35.7077469772006	SBSb-virgin-queens-4	taiwan	56.6790843335319	0.740461881690826	no
LOC105199345	whole_body_queen_taiwan	56.2019377352255	22.8133239603533	32.9114671765658	SBSb-virgin-queens-2	taiwan	55.7247911369191	0.510004191894386	no
LOC105199345	whole_body_queen_taiwan	56.2019377352255	22.4004892471407	42.3117885763777	SBSb-virgin-queens-1	taiwan	64.7122778235185	0.888221056904969	no
LOC105199346	whole_body_queen_taiwan	4.36476258658599	4.26675985659824	3.09598452997886	SBSb-virgin-queens-1	taiwan	7.3627443865771	-0.362705413338816	no
LOC105199346	whole_body_queen_taiwan	4.36476258658599	2	3	SBSb-virgin-queens-3	taiwan	5	0.415037499278844	no
LOC105199346	whole_body_queen_taiwan	4.36476258658599	0.911797276362229	0.915583255825657	SBSb-virgin-queens-4	taiwan	1.82738053218789	0.002854179526889	no
LOC105199346	whole_body_queen_taiwan	4.36476258658599	1.90111033002944	1.82841484314254	SBSb-virgin-queens-2	taiwan	3.72952517317198	-0.0366114271590206	no
LOC105199347	whole_body_queen_taiwan	1.42968768775709	0.911797276362229	0.915583255825657	SBSb-virgin-queens-4	taiwan	1.82738053218789	0.002854179526889	no
LOC105199347	whole_body_queen_taiwan	1.42968768775709	0	1.03199484332629	SBSb-virgin-queens-1	taiwan	1.03199484332629	1.02289674093044	no
LOC105199347	whole_body_queen_taiwan	1.42968768775709	1	0	SBSb-virgin-queens-3	taiwan	1	-1	no
LOC105199347	whole_body_queen_taiwan	1.42968768775709	0.95055516501472	0.914207421571271	SBSb-virgin-queens-2	taiwan	1.86476258658599	-0.0271376335436875	no
LOC105199348	whole_body_queen_taiwan	1.94620226489756	2	2	SBSb-virgin-queens-3	taiwan	4	0	no
LOC105199348	whole_body_queen_taiwan	1.94620226489756	0.911797276362229	0.915583255825657	SBSb-virgin-queens-4	taiwan	1.82738053218789	0.002854179526889	no
LOC105199348	whole_body_queen_taiwan	1.94620226489756	0	1.82841484314254	SBSb-virgin-queens-2	taiwan	1.82841484314254	1.49999373551223	no
LOC105199348	whole_body_queen_taiwan	1.94620226489756	0	2.06398968665257	SBSb-virgin-queens-1	taiwan	2.06398968665257	1.61541144117924	no
LOC105199349	whole_body_queen_taiwan	1.42968768775709	0.911797276362229	0.915583255825657	SBSb-virgin-queens-4	taiwan	1.82738053218789	0.002854179526889	no
LOC105199349	whole_body_queen_taiwan	1.42968768775709	1	0	SBSb-virgin-queens-3	taiwan	1	-1	no
LOC105199349	whole_body_queen_taiwan	1.42968768775709	0	1.03199484332629	SBSb-virgin-queens-1	taiwan	1.03199484332629	1.02289674093044	no
LOC105199349	whole_body_queen_taiwan	1.42968768775709	0.95055516501472	0.914207421571271	SBSb-virgin-queens-2	taiwan	1.86476258658599	-0.0271376335436875	no
LOC105199350	whole_body_queen_taiwan	0.97527758250736	0	1	SBSb-virgin-queens-3	taiwan	1	1	no
LOC105199350	whole_body_queen_taiwan	0.97527758250736	0.95055516501472	0	SBSb-virgin-queens-2	taiwan	0.95055516501472	-0.963884800806843	no
LOC105199350	whole_body_queen_taiwan	0.97527758250736	0	0.915583255825657	SBSb-virgin-queens-4	taiwan	0.915583255825657	0.937783730098295	no
LOC105199350	whole_body_queen_taiwan	0.97527758250736	2.13337992829912	0	SBSb-virgin-queens-1	taiwan	2.13337992829912	-1.64771970984345	no
LOC105199351	whole_body_queen_taiwan	45.8325114869573	16	19	SBSb-virgin-queens-3	taiwan	35	0.234465253637023	no
LOC105199351	whole_body_queen_taiwan	45.8325114869573	24.5338691754399	19.6079020231994	SBSb-virgin-queens-1	taiwan	44.1417711986393	-0.309214527954606	no
LOC105199351	whole_body_queen_taiwan	45.8325114869573	23.763879125368	27.4262226471381	SBSb-virgin-queens-2	taiwan	51.1901017725061	0.19898508006555	no
LOC105199351	whole_body_queen_taiwan	45.8325114869573	20.9713373563313	26.5519144189441	SBSb-virgin-queens-4	taiwan	47.5232517752753	0.326529879869827	no
LOC105199352	whole_body_queen_taiwan	5.82694307755152	10.9415673163467	0	SBSb-virgin-queens-4	taiwan	10.9415673163467	-3.5779202959061	taiwan
LOC105199352	whole_body_queen_taiwan	5.82694307755152	5	0	SBSb-virgin-queens-3	taiwan	5	-2.58496250072116	taiwan
LOC105199352	whole_body_queen_taiwan	5.82694307755152	3.20006989244868	0	SBSb-virgin-queens-1	taiwan	3.20006989244868	-2.07041333566524	taiwan
LOC105199352	whole_body_queen_taiwan	5.82694307755152	6.65388615510304	0	SBSb-virgin-queens-2	taiwan	6.65388615510304	-2.93619244233254	taiwan
LOC105199354	whole_body_queen_taiwan	4.83786261602596	3.80222066005888	1.82841484314254	SBSb-virgin-queens-2	taiwan	5.63063550320142	-0.763707960821336	no
LOC105199354	whole_body_queen_taiwan	4.83786261602596	3.64718910544892	1.83116651165131	SBSb-virgin-queens-4	taiwan	5.47835561710023	-0.714961750708274	no
LOC105199354	whole_body_queen_taiwan	4.83786261602596	2.13337992829912	2.06398968665257	SBSb-virgin-queens-1	taiwan	4.19736961495169	-0.0323082686642103	no
LOC105199354	whole_body_queen_taiwan	4.83786261602596	1	0	SBSb-virgin-queens-3	taiwan	1	-1	no
LOC105199355	whole_body_queen_taiwan	2.04934240373792	1.06668996414956	1.03199484332629	SBSb-virgin-queens-1	taiwan	2.09868480747585	-0.0244252372222371	no
LOC105199355	whole_body_queen_taiwan	2.04934240373792	0.95055516501472	1.82841484314254	SBSb-virgin-queens-2	taiwan	2.77897000815726	0.536108934705382	no
LOC105199355	whole_body_queen_taiwan	2.04934240373792	0	1.83116651165131	SBSb-virgin-queens-4	taiwan	1.83116651165131	1.50139660211161	no
LOC105199355	whole_body_queen_taiwan	2.04934240373792	1	1	SBSb-virgin-queens-3	taiwan	2	0	no
LOC105199356	whole_body_queen_taiwan	2.04934240373792	0	1.83116651165131	SBSb-virgin-queens-4	taiwan	1.83116651165131	1.50139660211161	no
LOC105199356	whole_body_queen_taiwan	2.04934240373792	0.95055516501472	1.82841484314254	SBSb-virgin-queens-2	taiwan	2.77897000815726	0.536108934705382	no
LOC105199356	whole_body_queen_taiwan	2.04934240373792	1.06668996414956	1.03199484332629	SBSb-virgin-queens-1	taiwan	2.09868480747585	-0.0244252372222371	no
LOC105199356	whole_body_queen_taiwan	2.04934240373792	1	1	SBSb-virgin-queens-3	taiwan	2	0	no
LOC105199358	whole_body_queen_taiwan	4.08133724706421	1.82359455272446	1.83116651165131	SBSb-virgin-queens-4	taiwan	3.65476106437577	0.00386365895862898	no
LOC105199358	whole_body_queen_taiwan	4.08133724706421	3.80222066005888	1.82841484314254	SBSb-virgin-queens-2	taiwan	5.63063550320142	-0.763707960821336	no
LOC105199358	whole_body_queen_taiwan	4.08133724706421	1	3	SBSb-virgin-queens-3	taiwan	4	1	no
LOC105199358	whole_body_queen_taiwan	4.08133724706421	1.06668996414956	3.09598452997886	SBSb-virgin-queens-1	taiwan	4.16267449412842	0.986888288316849	no
LOC105199473	whole_body_queen_taiwan	5.35575302742082	1.90111033002944	1.82841484314254	SBSb-virgin-queens-2	taiwan	3.72952517317198	-0.0366114271590206	no
LOC105199473	whole_body_queen_taiwan	5.35575302742082	3	3	SBSb-virgin-queens-3	taiwan	6	0	no
LOC105199473	whole_body_queen_taiwan	5.35575302742082	2.13337992829912	3.09598452997886	SBSb-virgin-queens-1	taiwan	5.22936445827798	0.386490556626067	no
LOC105199473	whole_body_queen_taiwan	5.35575302742082	2.73539182908669	2.74674976747697	SBSb-virgin-queens-4	taiwan	5.48214159656366	0.00438004380571571	no
LOC105199484	whole_body_queen_taiwan	3.86476258658599	1.90111033002944	1.82841484314254	SBSb-virgin-queens-2	taiwan	3.72952517317198	-0.0366114271590206	no
LOC105199484	whole_body_queen_taiwan	3.86476258658599	2	2	SBSb-virgin-queens-3	taiwan	4	0	no
LOC105199484	whole_body_queen_taiwan	3.86476258658599	1.82359455272446	1.83116651165131	SBSb-virgin-queens-4	taiwan	3.65476106437577	0.00386365895862898	no
LOC105199484	whole_body_queen_taiwan	3.86476258658599	2.13337992829912	2.06398968665257	SBSb-virgin-queens-1	taiwan	4.19736961495169	-0.0323082686642103	no
LOC105199492	whole_body_queen_taiwan	3.84861899577007	0.95055516501472	0.914207421571271	SBSb-virgin-queens-2	taiwan	1.86476258658599	-0.0271376335436875	no
LOC105199492	whole_body_queen_taiwan	3.84861899577007	1.06668996414956	2.06398968665257	SBSb-virgin-queens-1	taiwan	3.13067965080213	0.568089463026571	no
LOC105199492	whole_body_queen_taiwan	3.84861899577007	6	2	SBSb-virgin-queens-3	taiwan	8	-1.22239242133645	no
LOC105199492	whole_body_queen_taiwan	3.84861899577007	2.73539182908669	1.83116651165131	SBSb-virgin-queens-4	taiwan	4.566558340738	-0.399862982330147	no
LOC105199531	whole_body_queen_taiwan	1923.59148100301	482.340759195619	1541.84220281041	SBSb-virgin-queens-4	taiwan	2024.18296200603	1.67447795030686	taiwan
LOC105199531	whole_body_queen_taiwan	1923.59148100301	346.002080065358	1215.89587068979	SBSb-virgin-queens-2	taiwan	1561.89795075515	1.81018950645808	taiwan
LOC105199531	whole_body_queen_taiwan	1923.59148100301	594.146310031305	1663.57568744197	SBSb-virgin-queens-1	taiwan	2257.72199747328	1.48383818310997	taiwan
LOC105199531	whole_body_queen_taiwan	1923.59148100301	498	1325	SBSb-virgin-queens-3	taiwan	1823	1.40996905477533	taiwan
LOC105199549	whole_body_queen_taiwan	1.41369026609394	0	1	SBSb-virgin-queens-3	taiwan	1	1	no
LOC105199549	whole_body_queen_taiwan	1.41369026609394	0.911797276362229	0.915583255825657	SBSb-virgin-queens-4	taiwan	1.82738053218789	0.002854179526889	no
LOC105199549	whole_body_queen_taiwan	1.41369026609394	2.13337992829912	2.06398968665257	SBSb-virgin-queens-1	taiwan	4.19736961495169	-0.0323082686642103	no
LOC105199549	whole_body_queen_taiwan	1.41369026609394	0.95055516501472	0	SBSb-virgin-queens-2	taiwan	0.95055516501472	-0.963884800806843	no
LOC105199559	whole_body_queen_taiwan	1.44837871495614	1.82359455272446	1.83116651165131	SBSb-virgin-queens-4	taiwan	3.65476106437577	0.00386365895862898	no
LOC105199559	whole_body_queen_taiwan	1.44837871495614	0	1	SBSb-virgin-queens-3	taiwan	1	1	no
LOC105199559	whole_body_queen_taiwan	1.44837871495614	0	1.03199484332629	SBSb-virgin-queens-1	taiwan	1.03199484332629	1.02289674093044	no
LOC105199559	whole_body_queen_taiwan	1.44837871495614	0.95055516501472	0.914207421571271	SBSb-virgin-queens-2	taiwan	1.86476258658599	-0.0271376335436875	no
LOC105199565	whole_body_queen_taiwan	36.8374707247962	12	25	SBSb-virgin-queens-3	taiwan	37	1	no
LOC105199565	whole_body_queen_taiwan	36.8374707247962	11.853364592709	21.9739981398158	SBSb-virgin-queens-4	taiwan	33.8273627325248	0.837855889723603	no
LOC105199565	whole_body_queen_taiwan	36.8374707247962	15.2088826402355	21.9409781177105	SBSb-virgin-queens-2	taiwan	37.149860757946	0.501142261737307	no
LOC105199565	whole_body_queen_taiwan	36.8374707247962	17.067039426393	19.6079020231994	SBSb-virgin-queens-1	taiwan	36.6749414495924	0.189837522636232	no
LOC105199580	whole_body_queen_taiwan	2.38948500407863	0.95055516501472	1.82841484314254	SBSb-virgin-queens-2	taiwan	2.77897000815726	0.536108934705382	no
LOC105199580	whole_body_queen_taiwan	2.38948500407863	1	1	SBSb-virgin-queens-3	taiwan	2	0	no
LOC105199580	whole_body_queen_taiwan	2.38948500407863	2.13337992829912	1.03199484332629	SBSb-virgin-queens-1	taiwan	3.16537477162541	-0.624822968913018	no
LOC105199580	whole_body_queen_taiwan	2.38948500407863	0.911797276362229	0.915583255825657	SBSb-virgin-queens-4	taiwan	1.82738053218789	0.002854179526889	no
LOC105199591	whole_body_queen_taiwan	8.98214159656366	3.20006989244868	3.09598452997886	SBSb-virgin-queens-1	taiwan	6.29605442242754	-0.0362030691957152	no
LOC105199591	whole_body_queen_taiwan	8.98214159656366	5.47078365817337	5.49349953495394	SBSb-virgin-queens-4	taiwan	10.9642831931273	0.00505575446497445	no
LOC105199591	whole_body_queen_taiwan	8.98214159656366	4	3	SBSb-virgin-queens-3	taiwan	7	-0.321928094887362	no
LOC105199591	whole_body_queen_taiwan	8.98214159656366	7.60444132011776	6.3994519509989	SBSb-virgin-queens-2	taiwan	14.0038932711167	-0.217663102390947	no
LOC105199601	whole_body_queen_taiwan	78.9457517224361	27.3539182908669	23.8051646514671	SBSb-virgin-queens-4	taiwan	51.159082942334	-0.192907584603786	no
LOC105199601	whole_body_queen_taiwan	78.9457517224361	45.8676684584311	33.0238349864412	SBSb-virgin-queens-1	taiwan	78.8915034448722	-0.462047263260757	no
LOC105199601	whole_body_queen_taiwan	78.9457517224361	69.3905270460746	51.1956156079912	SBSb-virgin-queens-2	taiwan	120.586142654066	-0.431452661593363	no
LOC105199601	whole_body_queen_taiwan	78.9457517224361	41	38	SBSb-virgin-queens-3	taiwan	79	-0.106915203916512	no
LOC105199609	whole_body_queen_taiwan	1.46655258667786	0	1.03199484332629	SBSb-virgin-queens-1	taiwan	1.03199484332629	1.02289674093044	no
LOC105199609	whole_body_queen_taiwan	1.46655258667786	2.73539182908669	0.915583255825657	SBSb-virgin-queens-4	taiwan	3.65097508491234	-0.963475854343466	no
LOC105199609	whole_body_queen_taiwan	1.46655258667786	1.90111033002944	0	SBSb-virgin-queens-2	taiwan	1.90111033002944	-1.53660516267125	no
LOC105199609	whole_body_queen_taiwan	1.46655258667786	0	1	SBSb-virgin-queens-3	taiwan	1	1	no
LOC105199617	whole_body_queen_taiwan	3.69025012904216	2.73539182908669	0.915583255825657	SBSb-virgin-queens-4	taiwan	3.65097508491234	-0.963475854343466	no
LOC105199617	whole_body_queen_taiwan	3.69025012904216	1.90111033002944	1.82841484314254	SBSb-virgin-queens-2	taiwan	3.72952517317198	-0.0366114271590206	no
LOC105199617	whole_body_queen_taiwan	3.69025012904216	2.13337992829912	2.06398968665257	SBSb-virgin-queens-1	taiwan	4.19736961495169	-0.0323082686642103	no
LOC105199617	whole_body_queen_taiwan	3.69025012904216	2	1	SBSb-virgin-queens-3	taiwan	3	-0.584962500721156	no
LOC105199655	whole_body_queen_taiwan	2.41893130801298	7.60444132011776	5.48524452942763	SBSb-virgin-queens-2	taiwan	13.0896858495454	-0.407920549156711	no
LOC105199655	whole_body_queen_taiwan	2.41893130801298	1.82359455272446	0.915583255825657	SBSb-virgin-queens-4	taiwan	2.73917780855012	-0.559749213054689	no
LOC105199655	whole_body_queen_taiwan	2.41893130801298	0	1	SBSb-virgin-queens-3	taiwan	1	1	no
LOC105199655	whole_body_queen_taiwan	2.41893130801298	1.06668996414956	1.03199484332629	SBSb-virgin-queens-1	taiwan	2.09868480747585	-0.0244252372222371	no
LOC105199698	whole_body_queen_taiwan	15.9745316581829	0.95055516501472	17.3699410098542	SBSb-virgin-queens-2	taiwan	18.3204961748689	3.23539028770847	taiwan
LOC105199698	whole_body_queen_taiwan	15.9745316581829	0	8	SBSb-virgin-queens-3	taiwan	8	3.16992500144231	taiwan
LOC105199698	whole_body_queen_taiwan	15.9745316581829	0	15.4799226498943	SBSb-virgin-queens-1	taiwan	15.4799226498943	4.04263756599613	taiwan
LOC105199698	whole_body_queen_taiwan	15.9745316581829	2.73539182908669	13.7337488373849	SBSb-virgin-queens-4	taiwan	16.4691406664715	1.97979306512274	taiwan
LOC105199708	whole_body_queen_taiwan	27.2091399708726	19.0111033002944	11.8846964804265	SBSb-virgin-queens-2	taiwan	30.8957997807209	-0.635142158955262	no
LOC105199708	whole_body_queen_taiwan	27.2091399708726	13	14	SBSb-virgin-queens-3	taiwan	27	0.0995356735509144	no
LOC105199708	whole_body_queen_taiwan	27.2091399708726	11.853364592709	15.5649153490362	SBSb-virgin-queens-4	taiwan	27.4182799417452	0.36598477141174	no
LOC105199708	whole_body_queen_taiwan	27.2091399708726	6.40013978489736	9.28795358993658	SBSb-virgin-queens-1	taiwan	15.6880933748339	0.475331611749739	no
LOC105199719	whole_body_queen_taiwan	321.745597132053	146	160	SBSb-virgin-queens-3	taiwan	306	0.131244533278253	no
LOC105199719	whole_body_queen_taiwan	321.745597132053	147.336050577282	190.155143686824	SBSb-virgin-queens-2	taiwan	337.491194264106	0.365874758245844	no
LOC105199719	whole_body_queen_taiwan	321.745597132053	155.736734765836	144.47927806568	SBSb-virgin-queens-1	taiwan	300.216012831516	-0.107529675735093	no
LOC105199719	whole_body_queen_taiwan	321.745597132053	175.97687433791	178.538734886003	SBSb-virgin-queens-4	taiwan	354.515609223913	0.0207342793975017	no
LOC105199727	whole_body_queen_taiwan	1.44703524816872	1.06668996414956	0	SBSb-virgin-queens-1	taiwan	1.06668996414956	-1.04732197815267	no
LOC105199727	whole_body_queen_taiwan	1.44703524816872	0.911797276362229	0.915583255825657	SBSb-virgin-queens-4	taiwan	1.82738053218789	0.002854179526889	no
LOC105199727	whole_body_queen_taiwan	1.44703524816872	0	0.914207421571271	SBSb-virgin-queens-2	taiwan	0.914207421571271	0.936747167263155	no
LOC105199727	whole_body_queen_taiwan	1.44703524816872	1	1	SBSb-virgin-queens-3	taiwan	2	0	no
LOC105199739	whole_body_queen_taiwan	1.00862256458214	0.911797276362229	0	SBSb-virgin-queens-4	taiwan	0.911797276362229	-0.934929550571406	no
LOC105199739	whole_body_queen_taiwan	1.00862256458214	1	1	SBSb-virgin-queens-3	taiwan	2	0	no
LOC105199739	whole_body_queen_taiwan	1.00862256458214	1.06668996414956	0	SBSb-virgin-queens-1	taiwan	1.06668996414956	-1.04732197815267	no
LOC105199739	whole_body_queen_taiwan	1.00862256458214	0.95055516501472	0	SBSb-virgin-queens-2	taiwan	0.95055516501472	-0.963884800806843	no
LOC105199746	whole_body_queen_taiwan	16.562015409049	10	8	SBSb-virgin-queens-3	taiwan	18	-0.289506617194985	no
LOC105199746	whole_body_queen_taiwan	16.562015409049	7.29437821089783	9.15583255825657	SBSb-virgin-queens-4	taiwan	16.4502107691544	0.292102775688489	no
LOC105199746	whole_body_queen_taiwan	16.562015409049	5.70333099008832	10.9704890588553	SBSb-virgin-queens-2	taiwan	16.6738200489436	0.836532018729161	no
LOC105199746	whole_body_queen_taiwan	16.562015409049	12.8002795697947	3.09598452997886	SBSb-virgin-queens-1	taiwan	15.8962640997736	-1.75241532222353	no
LOC105199756	whole_body_queen_taiwan	1.52461998624528	0	6	SBSb-virgin-queens-3	taiwan	6	2.8073549220576	no
LOC105199756	whole_body_queen_taiwan	1.52461998624528	0	0.915583255825657	SBSb-virgin-queens-4	taiwan	0.915583255825657	0.937783730098295	no
LOC105199756	whole_body_queen_taiwan	1.52461998624528	1.06668996414956	1.03199484332629	SBSb-virgin-queens-1	taiwan	2.09868480747585	-0.0244252372222371	no
LOC105199756	whole_body_queen_taiwan	1.52461998624528	0.95055516501472	0	SBSb-virgin-queens-2	taiwan	0.95055516501472	-0.963884800806843	no
LOC105199767	whole_body_queen_taiwan	5.46469510156297	3.80222066005888	1.82841484314254	SBSb-virgin-queens-2	taiwan	5.63063550320142	-0.763707960821336	no
LOC105199767	whole_body_queen_taiwan	5.46469510156297	3.64718910544892	2.74674976747697	SBSb-virgin-queens-4	taiwan	6.39393887292589	-0.310718724572411	no
LOC105199767	whole_body_queen_taiwan	5.46469510156297	1	3	SBSb-virgin-queens-3	taiwan	4	1	no
LOC105199767	whole_body_queen_taiwan	5.46469510156297	4.26675985659824	1.03199484332629	SBSb-virgin-queens-1	taiwan	5.29875469992452	-1.3740189388779	no
LOC105199780	whole_body_queen_taiwan	35.3179066836977	13.8669695339443	10.3199484332629	SBSb-virgin-queens-1	taiwan	24.1869179672071	-0.393243213900714	no
LOC105199780	whole_body_queen_taiwan	35.3179066836977	23.763879125368	20.112563274568	SBSb-virgin-queens-2	taiwan	43.876442399936	-0.230135575686923	no
LOC105199780	whole_body_queen_taiwan	35.3179066836977	17.3241482508824	18.3116651165131	SBSb-virgin-queens-4	taiwan	35.6358133673955	0.0757264235654104	no
LOC105199780	whole_body_queen_taiwan	35.3179066836977	17	18	SBSb-virgin-queens-3	taiwan	35	0.0780025120012732	no
LOC105199786	whole_body_queen_taiwan	4.01896625423732	1.82359455272446	0.915583255825657	SBSb-virgin-queens-4	taiwan	2.73917780855012	-0.559749213054689	no
LOC105199786	whole_body_queen_taiwan	4.01896625423732	4.26675985659824	1.03199484332629	SBSb-virgin-queens-1	taiwan	5.29875469992452	-1.3740189388779	no
LOC105199786	whole_body_queen_taiwan	4.01896625423732	4.7527758250736	1.82841484314254	SBSb-virgin-queens-2	taiwan	6.58119066821614	-1.02426451667482	no
LOC105199786	whole_body_queen_taiwan	4.01896625423732	2	0	SBSb-virgin-queens-3	taiwan	2	-1.58496250072116	no
LOC105199789	whole_body_queen_taiwan	28.4786831402762	40.5342186376833	3.09598452997886	SBSb-virgin-queens-1	taiwan	43.6302031676621	-3.34201824240463	taiwan
LOC105199789	whole_body_queen_taiwan	28.4786831402762	19.1477428036068	3.66233302330263	SBSb-virgin-queens-4	taiwan	22.8100758269094	-2.11149425671965	taiwan
LOC105199789	whole_body_queen_taiwan	28.4786831402762	32.3188756105005	1.82841484314254	SBSb-virgin-queens-2	taiwan	34.147290453643	-3.5582740752489	taiwan
LOC105199789	whole_body_queen_taiwan	28.4786831402762	18	3	SBSb-virgin-queens-3	taiwan	21	-2.24792751344359	taiwan
LOC105199797	whole_body_queen_taiwan	58.1423138324416	34.6482965017647	25.6363311631184	SBSb-virgin-queens-4	taiwan	60.2846276648831	-0.420437755276727	no
LOC105199797	whole_body_queen_taiwan	58.1423138324416	41.8244272606477	24.6836003824243	SBSb-virgin-queens-2	taiwan	66.508027643072	-0.737586494915633	no
LOC105199797	whole_body_queen_taiwan	58.1423138324416	34	22	SBSb-virgin-queens-3	taiwan	56	-0.605721060887954	no
LOC105199797	whole_body_queen_taiwan	58.1423138324416	33.0673888886363	15.4799226498943	SBSb-virgin-queens-1	taiwan	48.5473115385306	-1.04768190450938	no
LOC105199803	whole_body_queen_taiwan	5.88720501976388	2.85166549504416	0.914207421571271	SBSb-virgin-queens-2	taiwan	3.76587291661543	-1.00873524786111	no
LOC105199803	whole_body_queen_taiwan	5.88720501976388	3.64718910544892	1.83116651165131	SBSb-virgin-queens-4	taiwan	5.47835561710023	-0.714961750708274	no
LOC105199803	whole_body_queen_taiwan	5.88720501976388	4	4	SBSb-virgin-queens-3	taiwan	8	0	no
LOC105199803	whole_body_queen_taiwan	5.88720501976388	3.20006989244868	3.09598452997886	SBSb-virgin-queens-1	taiwan	6.29605442242754	-0.0362030691957152	no
LOC105199810	whole_body_queen_taiwan	5.11797586629596	4.7527758250736	1.82841484314254	SBSb-virgin-queens-2	taiwan	6.58119066821614	-1.02426451667482	no
LOC105199810	whole_body_queen_taiwan	5.11797586629596	1.06668996414956	1.03199484332629	SBSb-virgin-queens-1	taiwan	2.09868480747585	-0.0244252372222371	no
LOC105199810	whole_body_queen_taiwan	5.11797586629596	4	4	SBSb-virgin-queens-3	taiwan	8	0	no
LOC105199810	whole_body_queen_taiwan	5.11797586629596	1.82359455272446	1.83116651165131	SBSb-virgin-queens-4	taiwan	3.65476106437577	0.00386365895862898	no
LOC105199816	whole_body_queen_taiwan	0.97527758250736	0.95055516501472	0	SBSb-virgin-queens-2	taiwan	0.95055516501472	-0.963884800806843	no
LOC105199816	whole_body_queen_taiwan	0.97527758250736	0	0.915583255825657	SBSb-virgin-queens-4	taiwan	0.915583255825657	0.937783730098295	no
LOC105199816	whole_body_queen_taiwan	0.97527758250736	1.06668996414956	0	SBSb-virgin-queens-1	taiwan	1.06668996414956	-1.04732197815267	no
LOC105199816	whole_body_queen_taiwan	0.97527758250736	0	1	SBSb-virgin-queens-3	taiwan	1	1	no
LOC105199827	whole_body_queen_taiwan	0.991275004170503	0	2	SBSb-virgin-queens-3	taiwan	2	1.58496250072116	no
LOC105199827	whole_body_queen_taiwan	0.991275004170503	0.95055516501472	0	SBSb-virgin-queens-2	taiwan	0.95055516501472	-0.963884800806843	no
LOC105199827	whole_body_queen_taiwan	0.991275004170503	0	1.03199484332629	SBSb-virgin-queens-1	taiwan	1.03199484332629	1.02289674093044	no
LOC105199827	whole_body_queen_taiwan	0.991275004170503	0.911797276362229	0	SBSb-virgin-queens-4	taiwan	0.911797276362229	-0.934929550571406	no
LOC105199837	whole_body_queen_taiwan	1.00862256458214	2	0	SBSb-virgin-queens-3	taiwan	2	-1.58496250072116	no
LOC105199837	whole_body_queen_taiwan	1.00862256458214	1.06668996414956	0	SBSb-virgin-queens-1	taiwan	1.06668996414956	-1.04732197815267	no
LOC105199837	whole_body_queen_taiwan	1.00862256458214	0	0.915583255825657	SBSb-virgin-queens-4	taiwan	0.915583255825657	0.937783730098295	no
LOC105199837	whole_body_queen_taiwan	1.00862256458214	0.95055516501472	0	SBSb-virgin-queens-2	taiwan	0.95055516501472	-0.963884800806843	no
LOC105199870	whole_body_queen_taiwan	1.56668996414956	2.13337992829912	0	SBSb-virgin-queens-1	taiwan	2.13337992829912	-1.64771970984345	no
LOC105199870	whole_body_queen_taiwan	1.56668996414956	0	0.914207421571271	SBSb-virgin-queens-2	taiwan	0.914207421571271	0.936747167263155	no
LOC105199870	whole_body_queen_taiwan	1.56668996414956	1	0	SBSb-virgin-queens-3	taiwan	1	-1	no
LOC105199870	whole_body_queen_taiwan	1.56668996414956	1.82359455272446	3.66233302330263	SBSb-virgin-queens-4	taiwan	5.48592757602709	0.723519114490083	no
LOC105199885	whole_body_queen_taiwan	3.63337992829912	3	0	SBSb-virgin-queens-3	taiwan	3	-2	no
LOC105199885	whole_body_queen_taiwan	3.63337992829912	0.911797276362229	0	SBSb-virgin-queens-4	taiwan	0.911797276362229	-0.934929550571406	no
LOC105199885	whole_body_queen_taiwan	3.63337992829912	4.26675985659824	0	SBSb-virgin-queens-1	taiwan	4.26675985659824	-2.39691567980834	no
LOC105199885	whole_body_queen_taiwan	3.63337992829912	3.80222066005888	1.82841484314254	SBSb-virgin-queens-2	taiwan	5.63063550320142	-0.763707960821336	no
LOC105199893	whole_body_queen_taiwan	6.42433598130209	1	4	SBSb-virgin-queens-3	taiwan	5	1.32192809488736	no
LOC105199893	whole_body_queen_taiwan	6.42433598130209	1.82359455272446	3.66233302330263	SBSb-virgin-queens-4	taiwan	5.48592757602709	0.723519114490083	no
LOC105199893	whole_body_queen_taiwan	6.42433598130209	4.26675985659824	3.09598452997886	SBSb-virgin-queens-1	taiwan	7.3627443865771	-0.362705413338816	no
LOC105199893	whole_body_queen_taiwan	6.42433598130209	5.70333099008832	3.65682968628509	SBSb-virgin-queens-2	taiwan	9.36016067637341	-0.525530051897344	no
LOC105199896	whole_body_queen_taiwan	2.31945615216259	3	3	SBSb-virgin-queens-3	taiwan	6	0	no
LOC105199896	whole_body_queen_taiwan	2.31945615216259	1.90111033002944	0.914207421571271	SBSb-virgin-queens-2	taiwan	2.81531775160071	-0.59985799540809	no
LOC105199896	whole_body_queen_taiwan	2.31945615216259	1.82359455272446	0	SBSb-virgin-queens-4	taiwan	1.82359455272446	-1.49753294315298	no
LOC105199896	whole_body_queen_taiwan	2.31945615216259	1.06668996414956	0	SBSb-virgin-queens-1	taiwan	1.06668996414956	-1.04732197815267	no
LOC105199901	whole_body_queen_taiwan	267.329388587524	96.9566268315015	141.702150343547	SBSb-virgin-queens-2	taiwan	238.658777175049	0.542792074399555	no
LOC105199901	whole_body_queen_taiwan	267.329388587524	168.53701433563	305.470473624581	SBSb-virgin-queens-1	taiwan	474.007487960211	0.854147801050231	no
LOC105199901	whole_body_queen_taiwan	267.329388587524	134	162	SBSb-virgin-queens-3	taiwan	296	0.271912557180247	no
LOC105199901	whole_body_queen_taiwan	267.329388587524	87.532538530774	56.7661618611908	SBSb-virgin-queens-4	taiwan	144.298700391965	-0.615983147754437	no
LOC105201519	whole_body_queen_taiwan	0.990448692860415	1.06668996414956	0	SBSb-virgin-queens-1	taiwan	1.06668996414956	-1.04732197815267	no
LOC105201519	whole_body_queen_taiwan	0.990448692860415	0.911797276362229	0	SBSb-virgin-queens-4	taiwan	0.911797276362229	-0.934929550571406	no
LOC105201519	whole_body_queen_taiwan	0.990448692860415	0	0.914207421571271	SBSb-virgin-queens-2	taiwan	0.914207421571271	0.936747167263155	no
LOC105201519	whole_body_queen_taiwan	0.990448692860415	2	1	SBSb-virgin-queens-3	taiwan	3	-0.584962500721156	no
LOC105201520	whole_body_queen_taiwan	10.266934957217	7.29437821089783	5.49349953495394	SBSb-virgin-queens-4	taiwan	12.7878777458518	-0.353137635470489	no
LOC105201520	whole_body_queen_taiwan	10.266934957217	6.65388615510304	5.48524452942763	SBSb-virgin-queens-2	taiwan	12.1391306845307	-0.239031469283233	no
LOC105201520	whole_body_queen_taiwan	10.266934957217	3	5	SBSb-virgin-queens-3	taiwan	8	0.584962500721156	no
LOC105201520	whole_body_queen_taiwan	10.266934957217	4.26675985659824	4.12797937330515	SBSb-virgin-queens-1	taiwan	8.39473922990338	-0.0385252209114001	no
LOC105201521	whole_body_queen_taiwan	4.70075541592637	1.82359455272446	4.57791627912829	SBSb-virgin-queens-4	taiwan	6.40151083185274	0.982193337467655	no
LOC105201521	whole_body_queen_taiwan	4.70075541592637	0.95055516501472	1.82841484314254	SBSb-virgin-queens-2	taiwan	2.77897000815726	0.536108934705382	no
LOC105201521	whole_body_queen_taiwan	4.70075541592637	4.26675985659824	5.15997421663143	SBSb-virgin-queens-1	taiwan	9.42673407322967	0.226008632537842	no
LOC105201521	whole_body_queen_taiwan	4.70075541592637	1	2	SBSb-virgin-queens-3	taiwan	3	0.584962500721156	no
LOC105201523	whole_body_queen_taiwan	10.2175334256503	10.9415673163467	5.49349953495394	SBSb-virgin-queens-4	taiwan	16.4350668513007	-0.878924097956405	no
LOC105201523	whole_body_queen_taiwan	10.2175334256503	2.13337992829912	1.03199484332629	SBSb-virgin-queens-1	taiwan	3.16537477162541	-0.624822968913018	no
LOC105201523	whole_body_queen_taiwan	10.2175334256503	3	1	SBSb-virgin-queens-3	taiwan	4	-1	no
LOC105201523	whole_body_queen_taiwan	10.2175334256503	9.5055516501472	10.9704890588553	SBSb-virgin-queens-2	taiwan	20.4760407090025	0.188330174921589	no
LOC105201525	whole_body_queen_taiwan	2.45055516501472	3.20006989244868	3.09598452997886	SBSb-virgin-queens-1	taiwan	6.29605442242754	-0.0362030691957152	no
LOC105201525	whole_body_queen_taiwan	2.45055516501472	3	0	SBSb-virgin-queens-3	taiwan	3	-2	no
LOC105201525	whole_body_queen_taiwan	2.45055516501472	0	0.915583255825657	SBSb-virgin-queens-4	taiwan	0.915583255825657	0.937783730098295	no
LOC105201525	whole_body_queen_taiwan	2.45055516501472	1.90111033002944	0	SBSb-virgin-queens-2	taiwan	1.90111033002944	-1.53660516267125	no
LOC105201526	whole_body_queen_taiwan	3.67396924705215	0.95055516501472	2.74262226471381	SBSb-virgin-queens-2	taiwan	3.69317742972853	0.940164646489563	no
LOC105201526	whole_body_queen_taiwan	3.67396924705215	4	3	SBSb-virgin-queens-3	taiwan	7	-0.321928094887362	no
LOC105201526	whole_body_queen_taiwan	3.67396924705215	1.82359455272446	1.83116651165131	SBSb-virgin-queens-4	taiwan	3.65476106437577	0.00386365895862898	no
LOC105201526	whole_body_queen_taiwan	3.67396924705215	0	2.06398968665257	SBSb-virgin-queens-1	taiwan	2.06398968665257	1.61541144117924	no
LOC105201527	whole_body_queen_taiwan	26.1612526295903	11.7335896056452	19.6079020231994	SBSb-virgin-queens-1	taiwan	31.3414916288446	0.694558466461645	no
LOC105201527	whole_body_queen_taiwan	26.1612526295903	4.7527758250736	3.65682968628509	SBSb-virgin-queens-2	taiwan	8.40960551135869	-0.304910132589468	no
LOC105201527	whole_body_queen_taiwan	26.1612526295903	11	13	SBSb-virgin-queens-3	taiwan	24	0.222392421336448	no
LOC105201527	whole_body_queen_taiwan	26.1612526295903	14.5887564217957	13.7337488373849	SBSb-virgin-queens-4	taiwan	28.3225052591805	-0.0813812883253355	no
LOC105201528	whole_body_queen_taiwan	20.4161540571296	17	8	SBSb-virgin-queens-3	taiwan	25	-1	no
LOC105201528	whole_body_queen_taiwan	20.4161540571296	6.40013978489736	4.12797937330515	SBSb-virgin-queens-1	taiwan	10.5281191582025	-0.529162063881609	no
LOC105201528	whole_body_queen_taiwan	20.4161540571296	7.60444132011776	8.22786679414144	SBSb-virgin-queens-2	taiwan	15.8323081142592	0.100915656411905	no
LOC105201528	whole_body_queen_taiwan	20.4161540571296	15.5005536981579	18.3116651165131	SBSb-virgin-queens-4	taiwan	33.812218814671	0.226958126809237	no
LOC105201529	whole_body_queen_taiwan	3.84658871486427	1.06668996414956	2.06398968665257	SBSb-virgin-queens-1	taiwan	3.13067965080213	0.568089463026571	no
LOC105201529	whole_body_queen_taiwan	3.84658871486427	1	3	SBSb-virgin-queens-3	taiwan	4	1	no
LOC105201529	whole_body_queen_taiwan	3.84658871486427	2.73539182908669	1.83116651165131	SBSb-virgin-queens-4	taiwan	4.566558340738	-0.399862982330147	no
LOC105201529	whole_body_queen_taiwan	3.84658871486427	0.95055516501472	2.74262226471381	SBSb-virgin-queens-2	taiwan	3.69317742972853	0.940164646489563	no
LOC105201530	whole_body_queen_taiwan	3.7875925727394	1.06668996414956	0	SBSb-virgin-queens-1	taiwan	1.06668996414956	-1.04732197815267	no
LOC105201530	whole_body_queen_taiwan	3.7875925727394	5	3	SBSb-virgin-queens-3	taiwan	8	-0.584962500721156	no
LOC105201530	whole_body_queen_taiwan	3.7875925727394	2.85166549504416	3.65682968628509	SBSb-virgin-queens-2	taiwan	6.50849518132925	0.273865704473311	no
LOC105201530	whole_body_queen_taiwan	3.7875925727394	0.911797276362229	0	SBSb-virgin-queens-4	taiwan	0.911797276362229	-0.934929550571406	no
LOC105201533	whole_body_queen_taiwan	38.4424425583264	17.067039426393	19.6079020231994	SBSb-virgin-queens-1	taiwan	36.6749414495924	0.189837522636232	no
LOC105201533	whole_body_queen_taiwan	38.4424425583264	19	16	SBSb-virgin-queens-3	taiwan	35	-0.234465253637023	no
LOC105201533	whole_body_queen_taiwan	38.4424425583264	46.5772030857213	7.31365937257017	SBSb-virgin-queens-2	taiwan	53.8908624582915	-2.51671491859373	no
LOC105201533	whole_body_queen_taiwan	38.4424425583264	18.2359455272446	21.9739981398158	SBSb-virgin-queens-4	taiwan	40.2099436670604	0.256197203330279	no
LOC105201534	whole_body_queen_taiwan	15.8134019828392	7.46682974904692	5.15997421663143	SBSb-virgin-queens-1	taiwan	12.6268039656783	-0.458897567306681	no
LOC105201534	whole_body_queen_taiwan	15.8134019828392	13.6769591454334	8.24024930243092	SBSb-virgin-queens-4	taiwan	21.9172084478644	-0.667549412235565	no
LOC105201534	whole_body_queen_taiwan	15.8134019828392	7.60444132011776	4.57103710785636	SBSb-virgin-queens-2	taiwan	12.1754784279741	-0.627135596600682	no
LOC105201534	whole_body_queen_taiwan	15.8134019828392	10	9	SBSb-virgin-queens-3	taiwan	19	-0.137503523749935	no
LOC105201535	whole_body_queen_taiwan	0.957791627912829	1.06668996414956	0	SBSb-virgin-queens-1	taiwan	1.06668996414956	-1.04732197815267	no
LOC105201535	whole_body_queen_taiwan	0.957791627912829	0	1	SBSb-virgin-queens-3	taiwan	1	1	no
LOC105201535	whole_body_queen_taiwan	0.957791627912829	0	0.915583255825657	SBSb-virgin-queens-4	taiwan	0.915583255825657	0.937783730098295	no
LOC105201535	whole_body_queen_taiwan	0.957791627912829	0	0.914207421571271	SBSb-virgin-queens-2	taiwan	0.914207421571271	0.936747167263155	no
LOC105201536	whole_body_queen_taiwan	1.98172369703092	1.06668996414956	1.03199484332629	SBSb-virgin-queens-1	taiwan	2.09868480747585	-0.0244252372222371	no
LOC105201536	whole_body_queen_taiwan	1.98172369703092	1	2	SBSb-virgin-queens-3	taiwan	3	0.584962500721156	no
LOC105201536	whole_body_queen_taiwan	1.98172369703092	0.911797276362229	0.915583255825657	SBSb-virgin-queens-4	taiwan	1.82738053218789	0.002854179526889	no
LOC105201536	whole_body_queen_taiwan	1.98172369703092	0.95055516501472	0.914207421571271	SBSb-virgin-queens-2	taiwan	1.86476258658599	-0.0271376335436875	no
LOC105201541	whole_body_queen_taiwan	2.40765887580036	1	1	SBSb-virgin-queens-3	taiwan	2	0	no
LOC105201541	whole_body_queen_taiwan	2.40765887580036	1.82359455272446	0	SBSb-virgin-queens-4	taiwan	1.82359455272446	-1.49753294315298	no
LOC105201541	whole_body_queen_taiwan	2.40765887580036	1.90111033002944	0.914207421571271	SBSb-virgin-queens-2	taiwan	2.81531775160071	-0.59985799540809	no
LOC105201541	whole_body_queen_taiwan	2.40765887580036	3.20006989244868	4.12797937330515	SBSb-virgin-queens-1	taiwan	7.32804926575382	0.287977123231701	no
LOC105202480	whole_body_queen_taiwan	0.955898638181115	0.911797276362229	0	SBSb-virgin-queens-4	taiwan	0.911797276362229	-0.934929550571406	no
LOC105202480	whole_body_queen_taiwan	0.955898638181115	1	0	SBSb-virgin-queens-3	taiwan	1	-1	no
LOC105202480	whole_body_queen_taiwan	0.955898638181115	0	0	SBSb-virgin-queens-1	taiwan	0	0	no
LOC105202480	whole_body_queen_taiwan	0.955898638181115	0.95055516501472	0.914207421571271	SBSb-virgin-queens-2	taiwan	1.86476258658599	-0.0271376335436875	no
LOC105202811	whole_body_queen_taiwan	1.01599742166314	1.82359455272446	1.83116651165131	SBSb-virgin-queens-4	taiwan	3.65476106437577	0.00386365895862898	no
LOC105202811	whole_body_queen_taiwan	1.01599742166314	1	0	SBSb-virgin-queens-3	taiwan	1	-1	no
LOC105202811	whole_body_queen_taiwan	1.01599742166314	0.95055516501472	0	SBSb-virgin-queens-2	taiwan	0.95055516501472	-0.963884800806843	no
LOC105202811	whole_body_queen_taiwan	1.01599742166314	0	1.03199484332629	SBSb-virgin-queens-1	taiwan	1.03199484332629	1.02289674093044	no
LOC105202812	whole_body_queen_taiwan	24.8846964804265	0	16.4804986048618	SBSb-virgin-queens-4	taiwan	16.4804986048618	4.1276744310132	taiwan
LOC105202812	whole_body_queen_taiwan	24.8846964804265	0	23.7693929608531	SBSb-virgin-queens-2	taiwan	23.7693929608531	4.63048660686694	taiwan
LOC105202812	whole_body_queen_taiwan	24.8846964804265	0	26	SBSb-virgin-queens-3	taiwan	26	4.75488750216347	taiwan
LOC105202812	whole_body_queen_taiwan	24.8846964804265	0	51.5997421663143	SBSb-virgin-queens-1	taiwan	51.5997421663143	5.71698382261233	taiwan
LOC105202813	whole_body_queen_taiwan	42.5496565457312	20.059540079969	18.3116651165131	SBSb-virgin-queens-4	taiwan	38.3712051964822	-0.125001365985209	no
LOC105202813	whole_body_queen_taiwan	42.5496565457312	11	9	SBSb-virgin-queens-3	taiwan	20	-0.263034405833794	no
LOC105202813	whole_body_queen_taiwan	42.5496565457312	26.6155446204122	20.112563274568	SBSb-virgin-queens-2	taiwan	46.7281078949801	-0.387378833018315	no
LOC105202813	whole_body_queen_taiwan	42.5496565457312	27.7339390678885	22.7038865531783	SBSb-virgin-queens-1	taiwan	50.4378256210668	-0.277632155397427	no
LOC105202814	whole_body_queen_taiwan	32.4886331617782	18	15	SBSb-virgin-queens-3	taiwan	33	-0.247927513443586	no
LOC105202814	whole_body_queen_taiwan	32.4886331617782	16.4123509745201	15.5649153490362	SBSb-virgin-queens-4	taiwan	31.9772663235563	-0.0719801745223106	no
LOC105202814	whole_body_queen_taiwan	32.4886331617782	17.109992970265	17.3699410098542	SBSb-virgin-queens-2	taiwan	34.4799339801191	0.0205610073490261	no
LOC105202814	whole_body_queen_taiwan	32.4886331617782	18.1337293905425	11.3519432765892	SBSb-virgin-queens-1	taiwan	29.4856726671317	-0.631380066953378	no
LOC105202816	whole_body_queen_taiwan	1.94757809915194	0	1.83116651165131	SBSb-virgin-queens-4	taiwan	1.83116651165131	1.50139660211161	no
LOC105202816	whole_body_queen_taiwan	1.94757809915194	0	12	SBSb-virgin-queens-3	taiwan	12	3.70043971814109	no
LOC105202816	whole_body_queen_taiwan	1.94757809915194	0	2.06398968665257	SBSb-virgin-queens-1	taiwan	2.06398968665257	1.61541144117924	no
LOC105202816	whole_body_queen_taiwan	1.94757809915194	0	0.914207421571271	SBSb-virgin-queens-2	taiwan	0.914207421571271	0.936747167263155	no
LOC105202817	whole_body_queen_taiwan	1.84607155938694	1	1	SBSb-virgin-queens-3	taiwan	2	0	no
LOC105202817	whole_body_queen_taiwan	1.84607155938694	0	1.03199484332629	SBSb-virgin-queens-1	taiwan	1.03199484332629	1.02289674093044	no
LOC105202817	whole_body_queen_taiwan	1.84607155938694	0.95055516501472	0.914207421571271	SBSb-virgin-queens-2	taiwan	1.86476258658599	-0.0271376335436875	no
LOC105202817	whole_body_queen_taiwan	1.84607155938694	0.911797276362229	0.915583255825657	SBSb-virgin-queens-4	taiwan	1.82738053218789	0.002854179526889	no
LOC105202818	whole_body_queen_taiwan	16.600426903874	9	12	SBSb-virgin-queens-3	taiwan	21	0.37851162325373	no
LOC105202818	whole_body_queen_taiwan	16.600426903874	4.26675985659824	4.12797937330515	SBSb-virgin-queens-1	taiwan	8.39473922990338	-0.0385252209114001	no
LOC105202818	whole_body_queen_taiwan	16.600426903874	7.60444132011776	6.3994519509989	SBSb-virgin-queens-2	taiwan	14.0038932711167	-0.217663102390947	no
LOC105202818	whole_body_queen_taiwan	16.600426903874	7.29437821089783	11.9025823257335	SBSb-virgin-queens-4	taiwan	19.1969605366314	0.637454097324456	no
LOC105202820	whole_body_queen_taiwan	5.39365223729625	1.90111033002944	3.65682968628509	SBSb-virgin-queens-2	taiwan	5.55794001631453	0.682742956926329	no
LOC105202820	whole_body_queen_taiwan	5.39365223729625	3	4	SBSb-virgin-queens-3	taiwan	7	0.321928094887362	no
LOC105202820	whole_body_queen_taiwan	5.39365223729625	2.13337992829912	3.09598452997886	SBSb-virgin-queens-1	taiwan	5.22936445827798	0.386490556626067	no
LOC105202820	whole_body_queen_taiwan	5.39365223729625	0.911797276362229	2.74674976747697	SBSb-virgin-queens-4	taiwan	3.6585470438392	0.97071007767607	no
LOC105202821	whole_body_queen_taiwan	2.4343858786929	2.13337992829912	0	SBSb-virgin-queens-1	taiwan	2.13337992829912	-1.64771970984345	no
LOC105202821	whole_body_queen_taiwan	2.4343858786929	4	0	SBSb-virgin-queens-3	taiwan	4	-2.32192809488736	no
LOC105202821	whole_body_queen_taiwan	2.4343858786929	1.90111033002944	0	SBSb-virgin-queens-2	taiwan	1.90111033002944	-1.53660516267125	no
LOC105202821	whole_body_queen_taiwan	2.4343858786929	2.73539182908669	0	SBSb-virgin-queens-4	taiwan	2.73539182908669	-1.90125958444176	no
LOC105202822	whole_body_queen_taiwan	3.56533982540107	1.06668996414956	2.06398968665257	SBSb-virgin-queens-1	taiwan	3.13067965080213	0.568089463026571	no
LOC105202822	whole_body_queen_taiwan	3.56533982540107	2	2	SBSb-virgin-queens-3	taiwan	4	0	no
LOC105202822	whole_body_queen_taiwan	3.56533982540107	2.85166549504416	1.82841484314254	SBSb-virgin-queens-2	taiwan	4.6800803381867	-0.445488679612038	no
LOC105202822	whole_body_queen_taiwan	3.56533982540107	1.82359455272446	0.915583255825657	SBSb-virgin-queens-4	taiwan	2.73917780855012	-0.559749213054689	no
LOC105202823	whole_body_queen_taiwan	1.51599742166314	0	2	SBSb-virgin-queens-3	taiwan	2	1.58496250072116	no
LOC105202823	whole_body_queen_taiwan	1.51599742166314	0	1.03199484332629	SBSb-virgin-queens-1	taiwan	1.03199484332629	1.02289674093044	no
LOC105202823	whole_body_queen_taiwan	1.51599742166314	0.95055516501472	0	SBSb-virgin-queens-2	taiwan	0.95055516501472	-0.963884800806843	no
LOC105202823	whole_body_queen_taiwan	1.51599742166314	4.55898638181115	29.298664186421	SBSb-virgin-queens-4	taiwan	33.8576505682322	2.44636043632717	no
LOC105202826	whole_body_queen_taiwan	9.64373259474326	6.40013978489736	4.12797937330515	SBSb-virgin-queens-1	taiwan	10.5281191582025	-0.529162063881609	no
LOC105202826	whole_body_queen_taiwan	9.64373259474326	6	4	SBSb-virgin-queens-3	taiwan	10	-0.485426827170242	no
LOC105202826	whole_body_queen_taiwan	9.64373259474326	3.64718910544892	3.66233302330263	SBSb-virgin-queens-4	taiwan	7.30952212875155	0.00469370482318007	no
LOC105202826	whole_body_queen_taiwan	9.64373259474326	3.80222066005888	5.48524452942763	SBSb-virgin-queens-2	taiwan	9.28746518948651	0.43345927671575	no
LOC105202827	whole_body_queen_taiwan	0.97527758250736	1.06668996414956	0	SBSb-virgin-queens-1	taiwan	1.06668996414956	-1.04732197815267	no
LOC105202827	whole_body_queen_taiwan	0.97527758250736	0.95055516501472	0	SBSb-virgin-queens-2	taiwan	0.95055516501472	-0.963884800806843	no
LOC105202827	whole_body_queen_taiwan	0.97527758250736	1	0	SBSb-virgin-queens-3	taiwan	1	-1	no
LOC105202827	whole_body_queen_taiwan	0.97527758250736	0.911797276362229	0	SBSb-virgin-queens-4	taiwan	0.911797276362229	-0.934929550571406	no
LOC105202831	whole_body_queen_taiwan	2.04934240373792	0.911797276362229	0	SBSb-virgin-queens-4	taiwan	0.911797276362229	-0.934929550571406	no
LOC105202831	whole_body_queen_taiwan	2.04934240373792	1.06668996414956	1.03199484332629	SBSb-virgin-queens-1	taiwan	2.09868480747585	-0.0244252372222371	no
LOC105202831	whole_body_queen_taiwan	2.04934240373792	1.90111033002944	1.82841484314254	SBSb-virgin-queens-2	taiwan	3.72952517317198	-0.0366114271590206	no
LOC105202831	whole_body_queen_taiwan	2.04934240373792	2	0	SBSb-virgin-queens-3	taiwan	2	-1.58496250072116	no
LOC105202832	whole_body_queen_taiwan	4.35821404081508	2	2	SBSb-virgin-queens-3	taiwan	4	0	no
LOC105202832	whole_body_queen_taiwan	4.35821404081508	4.26675985659824	1.03199484332629	SBSb-virgin-queens-1	taiwan	5.29875469992452	-1.3740189388779	no
LOC105202832	whole_body_queen_taiwan	4.35821404081508	3.80222066005888	0.914207421571271	SBSb-virgin-queens-2	taiwan	4.71642808163015	-1.32695452907041	no
LOC105202832	whole_body_queen_taiwan	4.35821404081508	1.82359455272446	0	SBSb-virgin-queens-4	taiwan	1.82359455272446	-1.49753294315298	no
LOC105202834	whole_body_queen_taiwan	15.4307844894751	10	5	SBSb-virgin-queens-3	taiwan	15	-0.874469117916141	no
LOC105202834	whole_body_queen_taiwan	15.4307844894751	21.8627687953386	8.22786679414144	SBSb-virgin-queens-2	taiwan	30.09063558948	-1.30893104796775	no
LOC105202834	whole_body_queen_taiwan	15.4307844894751	1.82359455272446	1.83116651165131	SBSb-virgin-queens-4	taiwan	3.65476106437577	0.00386365895862898	no
LOC105202834	whole_body_queen_taiwan	15.4307844894751	11.7335896056452	4.12797937330515	SBSb-virgin-queens-1	taiwan	15.8615689789503	-1.31217680905958	no
LOC105203016	whole_body_queen_taiwan	10.1996039891485	7.60444132011776	5.48524452942763	SBSb-virgin-queens-2	taiwan	13.0896858495454	-0.407920549156711	no
LOC105203016	whole_body_queen_taiwan	10.1996039891485	3.64718910544892	3.66233302330263	SBSb-virgin-queens-4	taiwan	7.30952212875155	0.00469370482318007	no
LOC105203016	whole_body_queen_taiwan	10.1996039891485	4	3	SBSb-virgin-queens-3	taiwan	7	-0.321928094887362	no
LOC105203016	whole_body_queen_taiwan	10.1996039891485	6.40013978489736	7.22396390328401	SBSb-virgin-queens-1	taiwan	13.6241036881814	0.152281409473642	no
LOC105203017	whole_body_queen_taiwan	4.14804175695499	2.73539182908669	1.83116651165131	SBSb-virgin-queens-4	taiwan	4.566558340738	-0.399862982330147	no
LOC105203017	whole_body_queen_taiwan	4.14804175695499	1.90111033002944	1.82841484314254	SBSb-virgin-queens-2	taiwan	3.72952517317198	-0.0366114271590206	no
LOC105203017	whole_body_queen_taiwan	4.14804175695499	2	1	SBSb-virgin-queens-3	taiwan	3	-0.584962500721156	no
LOC105203017	whole_body_queen_taiwan	4.14804175695499	4.26675985659824	2.06398968665257	SBSb-virgin-queens-1	taiwan	6.33074954325081	-0.781504238629094	no
LOC105203018	whole_body_queen_taiwan	27.0669076027668	19.0111033002944	10.9704890588553	SBSb-virgin-queens-2	taiwan	29.9815923591497	-0.74131861623393	no
LOC105203018	whole_body_queen_taiwan	27.0669076027668	16	4	SBSb-virgin-queens-3	taiwan	20	-1.76553474636298	no
LOC105203018	whole_body_queen_taiwan	27.0669076027668	12.8002795697947	11.3519432765892	SBSb-virgin-queens-1	taiwan	24.1522228463839	-0.159959461311429	no
LOC105203018	whole_body_queen_taiwan	27.0669076027668	34.6482965017647	0	SBSb-virgin-queens-4	taiwan	34.6482965017647	-5.15576123222481	no
LOC105203019	whole_body_queen_taiwan	336.903274915185	177.070534048827	210.526948038562	SBSb-virgin-queens-1	taiwan	387.597482087389	0.24839266261039	no
LOC105203019	whole_body_queen_taiwan	336.903274915185	182.506591682826	167.299958147543	SBSb-virgin-queens-2	taiwan	349.806549830369	-0.124797068694407	no
LOC105203019	whole_body_queen_taiwan	336.903274915185	144.063969665232	168.467319071921	SBSb-virgin-queens-4	taiwan	312.531288737153	0.224317849826784	no
LOC105203019	whole_body_queen_taiwan	336.903274915185	161	163	SBSb-virgin-queens-3	taiwan	324	0.017702001733459	no
LOC105203020	whole_body_queen_taiwan	53.3308947621754	22.7949319090557	23.8051646514671	SBSb-virgin-queens-4	taiwan	46.6000965605228	0.0599862074421406	no
LOC105203020	whole_body_queen_taiwan	53.3308947621754	27.7339390678885	29.9278504564623	SBSb-virgin-queens-1	taiwan	57.6617895243509	0.106150784817778	no
LOC105203020	whole_body_queen_taiwan	53.3308947621754	25	24	SBSb-virgin-queens-3	taiwan	49	-0.0565835283663674	no
LOC105203020	whole_body_queen_taiwan	53.3308947621754	35.1705411055447	35.6540894412796	SBSb-virgin-queens-2	taiwan	70.8246305468242	0.0191589859972262	no
LOC105203021	whole_body_queen_taiwan	3.5826873858127	3	1	SBSb-virgin-queens-3	taiwan	4	-1	no
LOC105203021	whole_body_queen_taiwan	3.5826873858127	1.82359455272446	2.74674976747697	SBSb-virgin-queens-4	taiwan	4.57034432020143	0.408106685094492	no
LOC105203021	whole_body_queen_taiwan	3.5826873858127	2.13337992829912	1.03199484332629	SBSb-virgin-queens-1	taiwan	3.16537477162541	-0.624822968913018	no
LOC105203021	whole_body_queen_taiwan	3.5826873858127	0.95055516501472	0.914207421571271	SBSb-virgin-queens-2	taiwan	1.86476258658599	-0.0271376335436875	no
LOC105203023	whole_body_queen_taiwan	84.8648170739852	46	37	SBSb-virgin-queens-3	taiwan	83	-0.306661338234052	no
LOC105203023	whole_body_queen_taiwan	84.8648170739852	43.766269265387	35.7077469772006	SBSb-virgin-queens-4	taiwan	79.4740162425876	-0.286327523413863	no
LOC105203023	whole_body_queen_taiwan	84.8648170739852	68.2681577055718	55.7277215396195	SBSb-virgin-queens-1	taiwan	123.995879245191	-0.288138384080401	no
LOC105203023	whole_body_queen_taiwan	84.8648170739852	44.6760927556919	42.0535413922785	SBSb-virgin-queens-2	taiwan	86.7296341479703	-0.0853073321665493	no
LOC105203024	whole_body_queen_taiwan	1.03334498207478	1.06668996414956	0	SBSb-virgin-queens-1	taiwan	1.06668996414956	-1.04732197815267	no
LOC105203024	whole_body_queen_taiwan	1.03334498207478	0.95055516501472	0	SBSb-virgin-queens-2	taiwan	0.95055516501472	-0.963884800806843	no
LOC105203024	whole_body_queen_taiwan	1.03334498207478	1	0	SBSb-virgin-queens-3	taiwan	1	-1	no
LOC105203024	whole_body_queen_taiwan	1.03334498207478	0.911797276362229	0.915583255825657	SBSb-virgin-queens-4	taiwan	1.82738053218789	0.002854179526889	no
LOC105203026	whole_body_queen_taiwan	2.82548754245617	1	1	SBSb-virgin-queens-3	taiwan	2	0	no
LOC105203026	whole_body_queen_taiwan	2.82548754245617	4.26675985659824	3.09598452997886	SBSb-virgin-queens-1	taiwan	7.3627443865771	-0.362705413338816	no
LOC105203026	whole_body_queen_taiwan	2.82548754245617	2.73539182908669	0.915583255825657	SBSb-virgin-queens-4	taiwan	3.65097508491234	-0.963475854343466	no
LOC105203026	whole_body_queen_taiwan	2.82548754245617	0.95055516501472	0.914207421571271	SBSb-virgin-queens-2	taiwan	1.86476258658599	-0.0271376335436875	no
LOC105203027	whole_body_queen_taiwan	93.1969230886282	36.267458781085	31.9918401431149	SBSb-virgin-queens-1	taiwan	68.2592989241999	-0.175807199467794	no
LOC105203027	whole_body_queen_taiwan	93.1969230886282	40.1190801599381	56.7661618611908	SBSb-virgin-queens-4	taiwan	96.8852420211288	0.49041664974659	no
LOC105203027	whole_body_queen_taiwan	93.1969230886282	43	64	SBSb-virgin-queens-3	taiwan	107	0.562936194391157	no
LOC105203027	whole_body_queen_taiwan	93.1969230886282	45.6266479207066	43.881956235421	SBSb-virgin-queens-2	taiwan	89.5086041561276	-0.0550191563278817	no
LOC105203028	whole_body_queen_taiwan	1.91558325582566	0	0.914207421571271	SBSb-virgin-queens-2	taiwan	0.914207421571271	0.936747167263155	no
LOC105203028	whole_body_queen_taiwan	1.91558325582566	0	1.83116651165131	SBSb-virgin-queens-4	taiwan	1.83116651165131	1.50139660211161	no
LOC105203028	whole_body_queen_taiwan	1.91558325582566	2.13337992829912	0	SBSb-virgin-queens-1	taiwan	2.13337992829912	-1.64771970984345	no
LOC105203028	whole_body_queen_taiwan	1.91558325582566	2	0	SBSb-virgin-queens-3	taiwan	2	-1.58496250072116	no
LOC105203029	whole_body_queen_taiwan	15.8266904578403	10.6668996414956	0	SBSb-virgin-queens-1	taiwan	10.6668996414956	-3.54434932550448	taiwan
LOC105203029	whole_body_queen_taiwan	15.8266904578403	7.60444132011776	0.914207421571271	SBSb-virgin-queens-2	taiwan	8.51864874168903	-2.16833435494287	taiwan
LOC105203029	whole_body_queen_taiwan	15.8266904578403	17.3241482508824	3.66233302330263	SBSb-virgin-queens-4	taiwan	20.986481274185	-1.97462217733398	taiwan
LOC105203029	whole_body_queen_taiwan	15.8266904578403	28	4	SBSb-virgin-queens-3	taiwan	32	-2.53605290024021	taiwan
LOC105203030	whole_body_queen_taiwan	16.3601606763734	9.11797276362229	2.74674976747697	SBSb-virgin-queens-4	taiwan	11.8647225310993	-1.4332087273397	no
LOC105203030	whole_body_queen_taiwan	16.3601606763734	11.4066619801766	7.31365937257017	SBSb-virgin-queens-2	taiwan	18.7203213527468	-0.57755946555896	no
LOC105203030	whole_body_queen_taiwan	16.3601606763734	11.7335896056452	7.22396390328401	SBSb-virgin-queens-1	taiwan	18.9575535089292	-0.630733335704326	no
LOC105203030	whole_body_queen_taiwan	16.3601606763734	10	4	SBSb-virgin-queens-3	taiwan	14	-1.13750352374993	no
LOC105203031	whole_body_queen_taiwan	35.0964608007599	14.5887564217957	16.4804986048618	SBSb-virgin-queens-4	taiwan	31.0692550266575	0.165240493123361	no
LOC105203031	whole_body_queen_taiwan	35.0964608007599	19.0111033002944	20.112563274568	SBSb-virgin-queens-2	taiwan	39.1236665748624	0.0773010352342799	no
LOC105203031	whole_body_queen_taiwan	35.0964608007599	14	12	SBSb-virgin-queens-3	taiwan	26	-0.206450877467426	no
LOC105203031	whole_body_queen_taiwan	35.0964608007599	23.4671792112903	16.5119174932206	SBSb-virgin-queens-1	taiwan	39.9790967045109	-0.482510722161551	no
LOC105203032	whole_body_queen_taiwan	72.6256330011561	35.1705411055447	25.5978078039956	SBSb-virgin-queens-2	taiwan	60.7683489095403	-0.44350783719661	no
LOC105203032	whole_body_queen_taiwan	72.6256330011561	53	31	SBSb-virgin-queens-3	taiwan	84	-0.754887502163469	no
LOC105203032	whole_body_queen_taiwan	72.6256330011561	34.1340788527859	37.1518143597463	SBSb-virgin-queens-1	taiwan	71.2858932125322	0.118880593553205	no
LOC105203032	whole_body_queen_taiwan	72.6256330011561	47.4134583708359	26.5519144189441	SBSb-virgin-queens-4	taiwan	73.96537278978	-0.813255588880449	no
LOC105203033	whole_body_queen_taiwan	9.35875225397827	5.70333099008832	3.65682968628509	SBSb-virgin-queens-2	taiwan	9.36016067637341	-0.525530051897344	no
LOC105203033	whole_body_queen_taiwan	9.35875225397827	5	3	SBSb-virgin-queens-3	taiwan	8	-0.584962500721156	no
LOC105203033	whole_body_queen_taiwan	9.35875225397827	7.29437821089783	6.4090827907796	SBSb-virgin-queens-4	taiwan	13.7034610016774	-0.162838878621403	no
LOC105203033	whole_body_queen_taiwan	9.35875225397827	2.13337992829912	7.22396390328401	SBSb-virgin-queens-1	taiwan	9.35734383158312	1.39211422240873	no
LOC105203034	whole_body_queen_taiwan	1348.90370191188	0.95055516501472	1.82841484314254	SBSb-virgin-queens-2	taiwan	2.77897000815726	0.536108934705382	no
LOC105203034	whole_body_queen_taiwan	1348.90370191188	563.212301070967	739.940302664947	SBSb-virgin-queens-1	taiwan	1303.15260373591	0.393119189516261	no
LOC105203034	whole_body_queen_taiwan	1348.90370191188	658	842	SBSb-virgin-queens-3	taiwan	1500	0.35525416593403	no
LOC105203034	whole_body_queen_taiwan	1348.90370191188	608.168783333607	786.48601675424	SBSb-virgin-queens-4	taiwan	1394.65480008785	0.370412292797235	no
LOC105203035	whole_body_queen_taiwan	10.1814301174267	3.64718910544892	3.66233302330263	SBSb-virgin-queens-4	taiwan	7.30952212875155	0.00469370482318007	no
LOC105203035	whole_body_queen_taiwan	10.1814301174267	6.65388615510304	6.3994519509989	SBSb-virgin-queens-2	taiwan	13.0533381061019	-0.0487740225174688	no
LOC105203035	whole_body_queen_taiwan	10.1814301174267	2.13337992829912	2.06398968665257	SBSb-virgin-queens-1	taiwan	4.19736961495169	-0.0323082686642103	no
LOC105203035	whole_body_queen_taiwan	10.1814301174267	10	6	SBSb-virgin-queens-3	taiwan	16	-0.652076696579693	no
LOC105203036	whole_body_queen_taiwan	6.82013583600118	16	10	SBSb-virgin-queens-3	taiwan	26	-0.628031222613042	no
LOC105203036	whole_body_queen_taiwan	6.82013583600118	3.64718910544892	3.66233302330263	SBSb-virgin-queens-4	taiwan	7.30952212875155	0.00469370482318007	no
LOC105203036	whole_body_queen_taiwan	6.82013583600118	4.26675985659824	2.06398968665257	SBSb-virgin-queens-1	taiwan	6.33074954325081	-0.781504238629094	no
LOC105203036	whole_body_queen_taiwan	6.82013583600118	3.80222066005888	1.82841484314254	SBSb-virgin-queens-2	taiwan	5.63063550320142	-0.763707960821336	no
LOC105203037	whole_body_queen_taiwan	1.98172369703092	0.911797276362229	0.915583255825657	SBSb-virgin-queens-4	taiwan	1.82738053218789	0.002854179526889	no
LOC105203037	whole_body_queen_taiwan	1.98172369703092	2	2	SBSb-virgin-queens-3	taiwan	4	0	no
LOC105203037	whole_body_queen_taiwan	1.98172369703092	1.06668996414956	1.03199484332629	SBSb-virgin-queens-1	taiwan	2.09868480747585	-0.0244252372222371	no
LOC105203037	whole_body_queen_taiwan	1.98172369703092	0.95055516501472	0.914207421571271	SBSb-virgin-queens-2	taiwan	1.86476258658599	-0.0271376335436875	no
LOC105203038	whole_body_queen_taiwan	2.41893130801298	3	2	SBSb-virgin-queens-3	taiwan	5	-0.415037499278844	no
LOC105203038	whole_body_queen_taiwan	2.41893130801298	1.82359455272446	0.915583255825657	SBSb-virgin-queens-4	taiwan	2.73917780855012	-0.559749213054689	no
LOC105203038	whole_body_queen_taiwan	2.41893130801298	0.95055516501472	0.914207421571271	SBSb-virgin-queens-2	taiwan	1.86476258658599	-0.0271376335436875	no
LOC105203038	whole_body_queen_taiwan	2.41893130801298	1.06668996414956	1.03199484332629	SBSb-virgin-queens-1	taiwan	2.09868480747585	-0.0244252372222371	no
LOC105203039	whole_body_queen_taiwan	140.564309280356	83.6488545212954	69.4797640394166	SBSb-virgin-queens-2	taiwan	153.128618560712	-0.264281451286967	no
LOC105203039	whole_body_queen_taiwan	140.564309280356	74	54	SBSb-virgin-queens-3	taiwan	128	-0.447458976971221	no
LOC105203039	whole_body_queen_taiwan	140.564309280356	93.8687168451612	72.23963903284	SBSb-virgin-queens-1	taiwan	166.108355878001	-0.373307753283787	no
LOC105203039	whole_body_queen_taiwan	140.564309280356	41.0308774363003	34.792163721375	SBSb-virgin-queens-4	taiwan	75.8230411576753	-0.231805813760667	no
LOC105203040	whole_body_queen_taiwan	30.7713081578502	9.60020967734603	16.5119174932206	SBSb-virgin-queens-1	taiwan	26.1121271705666	0.724244260154728	no
LOC105203040	whole_body_queen_taiwan	30.7713081578502	15.5005536981579	22.8895813956414	SBSb-virgin-queens-4	taiwan	38.3901350937993	0.533867137596219	no
LOC105203040	whole_body_queen_taiwan	30.7713081578502	13	9	SBSb-virgin-queens-3	taiwan	22	-0.485426827170242	no
LOC105203040	whole_body_queen_taiwan	30.7713081578502	18.0605481352797	17.3699410098542	SBSb-virgin-queens-2	taiwan	35.4304891451338	-0.0532426146376909	no
LOC105203041	whole_body_queen_taiwan	1.91179727636223	1.82359455272446	0	SBSb-virgin-queens-4	taiwan	1.82359455272446	-1.49753294315298	no
LOC105203041	whole_body_queen_taiwan	1.91179727636223	1.06668996414956	1.03199484332629	SBSb-virgin-queens-1	taiwan	2.09868480747585	-0.0244252372222371	no
LOC105203041	whole_body_queen_taiwan	1.91179727636223	0.95055516501472	0	SBSb-virgin-queens-2	taiwan	0.95055516501472	-0.963884800806843	no
LOC105203041	whole_body_queen_taiwan	1.91179727636223	1	1	SBSb-virgin-queens-3	taiwan	2	0	no
LOC105203042	whole_body_queen_taiwan	5.28706514983243	1.06668996414956	2.06398968665257	SBSb-virgin-queens-1	taiwan	3.13067965080213	0.568089463026571	no
LOC105203042	whole_body_queen_taiwan	5.28706514983243	0.911797276362229	3.66233302330263	SBSb-virgin-queens-4	taiwan	4.57413029966486	1.28612250707166	no
LOC105203042	whole_body_queen_taiwan	5.28706514983243	0.95055516501472	7.31365937257017	SBSb-virgin-queens-2	taiwan	8.26421453758489	2.09159883823423	no
LOC105203042	whole_body_queen_taiwan	5.28706514983243	1	5	SBSb-virgin-queens-3	taiwan	6	1.58496250072116	no
LOC105203043	whole_body_queen_taiwan	2.38948500407863	3.64718910544892	0.915583255825657	SBSb-virgin-queens-4	taiwan	4.56277236127457	-1.27857462272159	no
LOC105203043	whole_body_queen_taiwan	2.38948500407863	0.95055516501472	1.82841484314254	SBSb-virgin-queens-2	taiwan	2.77897000815726	0.536108934705382	no
LOC105203043	whole_body_queen_taiwan	2.38948500407863	1.06668996414956	0	SBSb-virgin-queens-1	taiwan	1.06668996414956	-1.04732197815267	no
LOC105203043	whole_body_queen_taiwan	2.38948500407863	1	1	SBSb-virgin-queens-3	taiwan	2	0	no
LOC105203044	whole_body_queen_taiwan	3.06533982540107	0.95055516501472	1.82841484314254	SBSb-virgin-queens-2	taiwan	2.77897000815726	0.536108934705382	no
LOC105203044	whole_body_queen_taiwan	3.06533982540107	3.64718910544892	0.915583255825657	SBSb-virgin-queens-4	taiwan	4.56277236127457	-1.27857462272159	no
LOC105203044	whole_body_queen_taiwan	3.06533982540107	2	1	SBSb-virgin-queens-3	taiwan	3	-0.584962500721156	no
LOC105203044	whole_body_queen_taiwan	3.06533982540107	1.06668996414956	2.06398968665257	SBSb-virgin-queens-1	taiwan	3.13067965080213	0.568089463026571	no
LOC105203048	whole_body_queen_taiwan	45.3019412699931	21.8627687953386	26.5120152255669	SBSb-virgin-queens-2	taiwan	48.3747840209054	0.267061687688583	no
LOC105203048	whole_body_queen_taiwan	45.3019412699931	25	19	SBSb-virgin-queens-3	taiwan	44	-0.37851162325373	no
LOC105203048	whole_body_queen_taiwan	45.3019412699931	7.46682974904692	8.25595874661029	SBSb-virgin-queens-1	taiwan	15.7227884956572	0.128560554780292	no
LOC105203048	whole_body_queen_taiwan	45.3019412699931	21.8831346326935	24.7207479072928	SBSb-virgin-queens-4	taiwan	46.6038825399862	0.168647901545482	no
LOC105203049	whole_body_queen_taiwan	67.1282414084686	30.4177652804711	27.4262226471381	SBSb-virgin-queens-2	taiwan	57.8439879276092	-0.144358164025048	no
LOC105203049	whole_body_queen_taiwan	67.1282414084686	37	26	SBSb-virgin-queens-3	taiwan	63	-0.493040011280117	no
LOC105203049	whole_body_queen_taiwan	67.1282414084686	38.2954856072136	32.9609972097237	SBSb-virgin-queens-4	taiwan	71.2564828169373	-0.210484758601892	no
LOC105203049	whole_body_queen_taiwan	67.1282414084686	41.6009086018328	47.4717627930092	SBSb-virgin-queens-1	taiwan	89.072671394842	0.186260349650432	no
LOC105203050	whole_body_queen_taiwan	59.5100097469849	29	27	SBSb-virgin-queens-3	taiwan	56	-0.0995356735509144	no
LOC105203050	whole_body_queen_taiwan	59.5100097469849	27.5660997854269	27.4262226471381	SBSb-virgin-queens-2	taiwan	54.992322432565	-0.00708167171727714	no
LOC105203050	whole_body_queen_taiwan	59.5100097469849	41.6009086018328	47.4717627930092	SBSb-virgin-queens-1	taiwan	89.072671394842	0.186260349650432	no
LOC105203050	whole_body_queen_taiwan	59.5100097469849	37.3836883308514	25.6363311631184	SBSb-virgin-queens-4	taiwan	63.0200194939698	-0.527097966287668	no
LOC105203051	whole_body_queen_taiwan	10.1466289698875	6.40013978489736	6.19196905995772	SBSb-virgin-queens-1	taiwan	12.5921088448551	-0.0411657084252941	no
LOC105203051	whole_body_queen_taiwan	10.1466289698875	4.55898638181115	7.32466604660526	SBSb-virgin-queens-4	taiwan	11.8836524284164	0.582570550168889	no
LOC105203051	whole_body_queen_taiwan	10.1466289698875	4.7527758250736	3.65682968628509	SBSb-virgin-queens-2	taiwan	8.40960551135869	-0.304910132589468	no
LOC105203051	whole_body_queen_taiwan	10.1466289698875	3	3	SBSb-virgin-queens-3	taiwan	6	0	no
LOC105203052	whole_body_queen_taiwan	53.1476258658599	20.059540079969	14.6493320932105	SBSb-virgin-queens-4	taiwan	34.7088721731796	-0.42837284477477	no
LOC105203052	whole_body_queen_taiwan	53.1476258658599	34	35	SBSb-virgin-queens-3	taiwan	69	0.0406419844973458	no
LOC105203052	whole_body_queen_taiwan	53.1476258658599	61.8680179206744	61.9196905995772	SBSb-virgin-queens-1	taiwan	123.787708520252	0.0011852973978576	no
LOC105203052	whole_body_queen_taiwan	53.1476258658599	19.0111033002944	18.2841484314254	SBSb-virgin-queens-2	taiwan	37.2952517317198	-0.0533852721575088	no
LOC105203053	whole_body_queen_taiwan	9.52624295838254	5	4	SBSb-virgin-queens-3	taiwan	9	-0.263034405833794	no
LOC105203053	whole_body_queen_taiwan	9.52624295838254	4.55898638181115	5.49349953495394	SBSb-virgin-queens-4	taiwan	10.0524859167651	0.224174350117286	no
LOC105203053	whole_body_queen_taiwan	9.52624295838254	8.55499648513248	5.48524452942763	SBSb-virgin-queens-2	taiwan	14.0402410145601	-0.559094369448776	no
LOC105203053	whole_body_queen_taiwan	9.52624295838254	4.26675985659824	3.09598452997886	SBSb-virgin-queens-1	taiwan	7.3627443865771	-0.362705413338816	no
LOC105203055	whole_body_queen_taiwan	2.88948500407863	1	2	SBSb-virgin-queens-3	taiwan	3	0.584962500721156	no
LOC105203055	whole_body_queen_taiwan	2.88948500407863	1.82359455272446	1.83116651165131	SBSb-virgin-queens-4	taiwan	3.65476106437577	0.00386365895862898	no
LOC105203055	whole_body_queen_taiwan	2.88948500407863	1.06668996414956	1.03199484332629	SBSb-virgin-queens-1	taiwan	2.09868480747585	-0.0244252372222371	no
LOC105203055	whole_body_queen_taiwan	2.88948500407863	0.95055516501472	1.82841484314254	SBSb-virgin-queens-2	taiwan	2.77897000815726	0.536108934705382	no
LOC105203056	whole_body_queen_taiwan	122.38062392758	66.5388615510304	72.2223863041304	SBSb-virgin-queens-2	taiwan	138.761247855161	0.116566930389799	no
LOC105203056	whole_body_queen_taiwan	122.38062392758	29.1775128435913	47.6103293029342	SBSb-virgin-queens-4	taiwan	76.7878421465255	0.687789000081199	no
LOC105203056	whole_body_queen_taiwan	122.38062392758	48	58	SBSb-virgin-queens-3	taiwan	106	0.267933205246633	no
LOC105203056	whole_body_queen_taiwan	122.38062392758	74.6682974904692	80.4955977794503	SBSb-virgin-queens-1	taiwan	155.163895269919	0.107033144726116	no
LOC105203057	whole_body_queen_taiwan	23.8741874797578	8.53351971319648	9.28795358993658	SBSb-virgin-queens-1	taiwan	17.8214733031331	0.109875188462344	no
LOC105203057	whole_body_queen_taiwan	23.8741874797578	14.2583274752208	14.6273187451403	SBSb-virgin-queens-2	taiwan	28.8856462203611	0.0344734379765311	no
LOC105203057	whole_body_queen_taiwan	23.8741874797578	13.6769591454334	10.0714158140822	SBSb-virgin-queens-4	taiwan	23.7483749595157	-0.406713367560837	no
LOC105203057	whole_body_queen_taiwan	23.8741874797578	12	12	SBSb-virgin-queens-3	taiwan	24	0	no
LOC105203058	whole_body_queen_taiwan	1.01599742166314	0.911797276362229	0.915583255825657	SBSb-virgin-queens-4	taiwan	1.82738053218789	0.002854179526889	no
LOC105203058	whole_body_queen_taiwan	1.01599742166314	0	1.03199484332629	SBSb-virgin-queens-1	taiwan	1.03199484332629	1.02289674093044	no
LOC105203058	whole_body_queen_taiwan	1.01599742166314	0.95055516501472	0	SBSb-virgin-queens-2	taiwan	0.95055516501472	-0.963884800806843	no
LOC105203058	whole_body_queen_taiwan	1.01599742166314	0	1	SBSb-virgin-queens-3	taiwan	1	1	no
LOC105203059	whole_body_queen_taiwan	7.0525808943981	5.3334498207478	4.12797937330515	SBSb-virgin-queens-1	taiwan	9.46142919405294	-0.304601088710179	no
LOC105203059	whole_body_queen_taiwan	7.0525808943981	6.3825809345356	8.24024930243092	SBSb-virgin-queens-4	taiwan	14.6228302369665	0.323806508582411	no
LOC105203059	whole_body_queen_taiwan	7.0525808943981	1.90111033002944	2.74262226471381	SBSb-virgin-queens-2	taiwan	4.64373259474325	0.36744428462516	no
LOC105203059	whole_body_queen_taiwan	7.0525808943981	1	2	SBSb-virgin-queens-3	taiwan	3	0.584962500721156	no
LOC105203060	whole_body_queen_taiwan	9.23071459702647	6.3825809345356	8.24024930243092	SBSb-virgin-queens-4	taiwan	14.6228302369665	0.323806508582411	no
LOC105203060	whole_body_queen_taiwan	9.23071459702647	3.80222066005888	1.82841484314254	SBSb-virgin-queens-2	taiwan	5.63063550320142	-0.763707960821336	no
LOC105203060	whole_body_queen_taiwan	9.23071459702647	5	4	SBSb-virgin-queens-3	taiwan	9	-0.263034405833794	no
LOC105203060	whole_body_queen_taiwan	9.23071459702647	5.3334498207478	4.12797937330515	SBSb-virgin-queens-1	taiwan	9.46142919405294	-0.304601088710179	no
LOC105203061	whole_body_queen_taiwan	23.9277537902353	10.4561068151619	10.056281637284	SBSb-virgin-queens-2	taiwan	20.5123884524459	-0.0512505781085542	no
LOC105203061	whole_body_queen_taiwan	23.9277537902353	8.20617548726006	14.6493320932105	SBSb-virgin-queens-4	taiwan	22.8555075804706	0.765427236410433	no
LOC105203061	whole_body_queen_taiwan	23.9277537902353	9	16	SBSb-virgin-queens-3	taiwan	25	0.765534746362977	no
LOC105203061	whole_body_queen_taiwan	23.9277537902353	13.8669695339443	18.5759071798732	SBSb-virgin-queens-1	taiwan	32.4428767138174	0.396968565884289	no
LOC105203063	whole_body_queen_taiwan	6.19886242619466	1.90111033002944	0.914207421571271	SBSb-virgin-queens-2	taiwan	2.81531775160071	-0.59985799540809	no
LOC105203063	whole_body_queen_taiwan	6.19886242619466	3.20006989244868	4.12797937330515	SBSb-virgin-queens-1	taiwan	7.32804926575382	0.287977123231701	no
LOC105203063	whole_body_queen_taiwan	6.19886242619466	3	3	SBSb-virgin-queens-3	taiwan	6	0	no
LOC105203063	whole_body_queen_taiwan	6.19886242619466	2.73539182908669	3.66233302330263	SBSb-virgin-queens-4	taiwan	6.39772485238932	0.319792473201306	no
LOC105203064	whole_body_queen_taiwan	48.2137385463554	18.0605481352797	23.7693929608531	SBSb-virgin-queens-2	taiwan	41.8299410961327	0.377968903713937	no
LOC105203064	whole_body_queen_taiwan	48.2137385463554	23.706729185418	24.7207479072928	SBSb-virgin-queens-4	taiwan	48.4274770927107	0.0580285626342586	no
LOC105203064	whole_body_queen_taiwan	48.2137385463554	25.6005591395894	23.7358813965046	SBSb-virgin-queens-1	taiwan	49.336440536094	-0.104851264304985	no
LOC105203064	whole_body_queen_taiwan	48.2137385463554	24	24	SBSb-virgin-queens-3	taiwan	48	0	no
LOC105203065	whole_body_queen_taiwan	35.8047983788379	6	14	SBSb-virgin-queens-3	taiwan	20	1.09953567355091	taiwan
LOC105203065	whole_body_queen_taiwan	35.8047983788379	10.0297700399845	24.7207479072928	SBSb-virgin-queens-4	taiwan	34.7505179472773	1.22152988147822	taiwan
LOC105203065	whole_body_queen_taiwan	35.8047983788379	7.60444132011776	29.2546374902807	SBSb-virgin-queens-2	taiwan	36.8590788103984	1.81400287114919	taiwan
LOC105203065	whole_body_queen_taiwan	35.8047983788379	10.6668996414956	62.9516854429035	SBSb-virgin-queens-1	taiwan	73.6185850843991	2.45456115113368	taiwan
LOC105203066	whole_body_queen_taiwan	4.78517216010072	3.20006989244868	4.12797937330515	SBSb-virgin-queens-1	taiwan	7.32804926575382	0.287977123231701	no
LOC105203066	whole_body_queen_taiwan	4.78517216010072	2	3	SBSb-virgin-queens-3	taiwan	5	0.415037499278844	no
LOC105203066	whole_body_queen_taiwan	4.78517216010072	1.82359455272446	2.74674976747697	SBSb-virgin-queens-4	taiwan	4.57034432020143	0.408106685094492	no
LOC105203066	whole_body_queen_taiwan	4.78517216010072	0.95055516501472	2.74262226471381	SBSb-virgin-queens-2	taiwan	3.69317742972853	0.940164646489563	no
LOC105203067	whole_body_queen_taiwan	18.4782015484639	9.11797276362229	8.24024930243092	SBSb-virgin-queens-4	taiwan	17.3582220660532	-0.130916579429738	no
LOC105203067	whole_body_queen_taiwan	18.4782015484639	12.8002795697947	7.22396390328401	SBSb-virgin-queens-1	taiwan	20.0242434730787	-0.746791656440861	no
LOC105203067	whole_body_queen_taiwan	18.4782015484639	6	8	SBSb-virgin-queens-3	taiwan	14	0.362570079384708	no
LOC105203067	whole_body_queen_taiwan	18.4782015484639	10.4561068151619	9.14207421571271	SBSb-virgin-queens-2	taiwan	19.5981810308746	-0.175764112636292	no
LOC105203068	whole_body_queen_taiwan	2.90765887580036	2	1	SBSb-virgin-queens-3	taiwan	3	-0.584962500721156	no
LOC105203068	whole_body_queen_taiwan	2.90765887580036	3.64718910544892	1.83116651165131	SBSb-virgin-queens-4	taiwan	5.47835561710023	-0.714961750708274	no
LOC105203068	whole_body_queen_taiwan	2.90765887580036	1.90111033002944	0.914207421571271	SBSb-virgin-queens-2	taiwan	2.81531775160071	-0.59985799540809	no
LOC105203068	whole_body_queen_taiwan	2.90765887580036	1.06668996414956	1.03199484332629	SBSb-virgin-queens-1	taiwan	2.09868480747585	-0.0244252372222371	no
LOC105203069	whole_body_queen_taiwan	2.86958890427506	1.82359455272446	0.915583255825657	SBSb-virgin-queens-4	taiwan	2.73917780855012	-0.559749213054689	no
LOC105203069	whole_body_queen_taiwan	2.86958890427506	2	1	SBSb-virgin-queens-3	taiwan	3	-0.584962500721156	no
LOC105203069	whole_body_queen_taiwan	2.86958890427506	2.13337992829912	0	SBSb-virgin-queens-1	taiwan	2.13337992829912	-1.64771970984345	no
LOC105203069	whole_body_queen_taiwan	2.86958890427506	1.90111033002944	1.82841484314254	SBSb-virgin-queens-2	taiwan	3.72952517317198	-0.0366114271590206	no
LOC105203070	whole_body_queen_taiwan	5.37499357756417	3	4	SBSb-virgin-queens-3	taiwan	7	0.321928094887362	no
LOC105203070	whole_body_queen_taiwan	5.37499357756417	3.80222066005888	0.914207421571271	SBSb-virgin-queens-2	taiwan	4.71642808163015	-1.32695452907041	no
LOC105203070	whole_body_queen_taiwan	5.37499357756417	1.82359455272446	3.66233302330263	SBSb-virgin-queens-4	taiwan	5.48592757602709	0.723519114490083	no
LOC105203070	whole_body_queen_taiwan	5.37499357756417	3.20006989244868	2.06398968665257	SBSb-virgin-queens-1	taiwan	5.26405957910125	-0.455001894485993	no
LOC105203071	whole_body_queen_taiwan	5.10048991170143	3	3	SBSb-virgin-queens-3	taiwan	6	0	no
LOC105203071	whole_body_queen_taiwan	5.10048991170143	2.13337992829912	1.03199484332629	SBSb-virgin-queens-1	taiwan	3.16537477162541	-0.624822968913018	no
LOC105203071	whole_body_queen_taiwan	5.10048991170143	3.80222066005888	1.82841484314254	SBSb-virgin-queens-2	taiwan	5.63063550320142	-0.763707960821336	no
LOC105203071	whole_body_queen_taiwan	5.10048991170143	1.82359455272446	2.74674976747697	SBSb-virgin-queens-4	taiwan	4.57034432020143	0.408106685094492	no
LOC105203072	whole_body_queen_taiwan	16.5787288751476	13.6769591454334	16.4804986048618	SBSb-virgin-queens-4	taiwan	30.1574577502953	0.252193242620199	no
LOC105203072	whole_body_queen_taiwan	16.5787288751476	1	2	SBSb-virgin-queens-3	taiwan	3	0.584962500721156	no
LOC105203072	whole_body_queen_taiwan	16.5787288751476	17.067039426393	17.5439123365469	SBSb-virgin-queens-1	taiwan	34.6109517629398	0.0375855344627999	no
LOC105203072	whole_body_queen_taiwan	16.5787288751476	0.95055516501472	0.914207421571271	SBSb-virgin-queens-2	taiwan	1.86476258658599	-0.0271376335436875	no
LOC105203073	whole_body_queen_taiwan	1.98172369703092	0.95055516501472	0.914207421571271	SBSb-virgin-queens-2	taiwan	1.86476258658599	-0.0271376335436875	no
LOC105203073	whole_body_queen_taiwan	1.98172369703092	0.911797276362229	0.915583255825657	SBSb-virgin-queens-4	taiwan	1.82738053218789	0.002854179526889	no
LOC105203073	whole_body_queen_taiwan	1.98172369703092	1.06668996414956	1.03199484332629	SBSb-virgin-queens-1	taiwan	2.09868480747585	-0.0244252372222371	no
LOC105203073	whole_body_queen_taiwan	1.98172369703092	2	1	SBSb-virgin-queens-3	taiwan	3	-0.584962500721156	no
LOC105203074	whole_body_queen_taiwan	182.761379981201	131.202865590396	116.61541729587	SBSb-virgin-queens-1	taiwan	247.818282886266	-0.168676264306879	no
LOC105203074	whole_body_queen_taiwan	182.761379981201	100.75884749156	87.763912470842	SBSb-virgin-queens-2	taiwan	188.522759962402	-0.197109071930965	no
LOC105203074	whole_body_queen_taiwan	182.761379981201	73.8555793853405	67.7531609310986	SBSb-virgin-queens-4	taiwan	141.608740316439	-0.122683808993988	no
LOC105203074	whole_body_queen_taiwan	182.761379981201	92	85	SBSb-virgin-queens-3	taiwan	177	-0.112894056405934	no
LOC105203075	whole_body_queen_taiwan	3.69214311877388	1.82359455272446	1.83116651165131	SBSb-virgin-queens-4	taiwan	3.65476106437577	0.00386365895862898	no
LOC105203075	whole_body_queen_taiwan	3.69214311877388	1.90111033002944	1.82841484314254	SBSb-virgin-queens-2	taiwan	3.72952517317198	-0.0366114271590206	no
LOC105203075	whole_body_queen_taiwan	3.69214311877388	1.06668996414956	0	SBSb-virgin-queens-1	taiwan	1.06668996414956	-1.04732197815267	no
LOC105203075	whole_body_queen_taiwan	3.69214311877388	3	2	SBSb-virgin-queens-3	taiwan	5	-0.415037499278844	no
LOC105203076	whole_body_queen_taiwan	18.8613942478286	9.11797276362229	16.4804986048618	SBSb-virgin-queens-4	taiwan	25.5984713684841	0.788826075426026	no
LOC105203076	whole_body_queen_taiwan	18.8613942478286	3.80222066005888	3.65682968628509	SBSb-virgin-queens-2	taiwan	7.45905034634397	-0.0443535767359868	no
LOC105203076	whole_body_queen_taiwan	18.8613942478286	12	10	SBSb-virgin-queens-3	taiwan	22	-0.241008099503795	no
LOC105203076	whole_body_queen_taiwan	18.8613942478286	7.46682974904692	8.25595874661029	SBSb-virgin-queens-1	taiwan	15.7227884956572	0.128560554780292	no
LOC105203077	whole_body_queen_taiwan	42.4376860147144	20.9122136303238	21.9409781177105	SBSb-virgin-queens-2	taiwan	42.8531917480344	0.0661916672034475	no
LOC105203077	whole_body_queen_taiwan	42.4376860147144	27	18	SBSb-virgin-queens-3	taiwan	45	-0.559427408614019	no
LOC105203077	whole_body_queen_taiwan	42.4376860147144	17.067039426393	18.5759071798732	SBSb-virgin-queens-1	taiwan	35.6429466062661	0.115719049042089	no
LOC105203077	whole_body_queen_taiwan	42.4376860147144	22.7949319090557	19.2272483723388	SBSb-virgin-queens-4	taiwan	42.0221802813945	-0.234354250895876	no
LOC105203078	whole_body_queen_taiwan	1.82979067739693	0	1.82841484314254	SBSb-virgin-queens-2	taiwan	1.82841484314254	1.49999373551223	no
LOC105203078	whole_body_queen_taiwan	1.82979067739693	1	1	SBSb-virgin-queens-3	taiwan	2	0	no
LOC105203078	whole_body_queen_taiwan	1.82979067739693	0	1.83116651165131	SBSb-virgin-queens-4	taiwan	1.83116651165131	1.50139660211161	no
LOC105203078	whole_body_queen_taiwan	1.82979067739693	1.06668996414956	0	SBSb-virgin-queens-1	taiwan	1.06668996414956	-1.04732197815267	no
LOC105203079	whole_body_queen_taiwan	1.91420742157127	0	1.82841484314254	SBSb-virgin-queens-2	taiwan	1.82841484314254	1.49999373551223	no
LOC105203079	whole_body_queen_taiwan	1.91420742157127	1.06668996414956	1.03199484332629	SBSb-virgin-queens-1	taiwan	2.09868480747585	-0.0244252372222371	no
LOC105203079	whole_body_queen_taiwan	1.91420742157127	1	1	SBSb-virgin-queens-3	taiwan	2	0	no
LOC105203079	whole_body_queen_taiwan	1.91420742157127	0	0.915583255825657	SBSb-virgin-queens-4	taiwan	0.915583255825657	0.937783730098295	no
LOC105203080	whole_body_queen_taiwan	3.84004016909335	1.82359455272446	0.915583255825657	SBSb-virgin-queens-4	taiwan	2.73917780855012	-0.559749213054689	no
LOC105203080	whole_body_queen_taiwan	3.84004016909335	2.85166549504416	1.82841484314254	SBSb-virgin-queens-2	taiwan	4.6800803381867	-0.445488679612038	no
LOC105203080	whole_body_queen_taiwan	3.84004016909335	3.20006989244868	3.09598452997886	SBSb-virgin-queens-1	taiwan	6.29605442242754	-0.0362030691957152	no
LOC105203080	whole_body_queen_taiwan	3.84004016909335	2	1	SBSb-virgin-queens-3	taiwan	3	-0.584962500721156	no
LOC105203081	whole_body_queen_taiwan	1.47527758250736	1	1	SBSb-virgin-queens-3	taiwan	2	0	no
LOC105203081	whole_body_queen_taiwan	1.47527758250736	0	0.915583255825657	SBSb-virgin-queens-4	taiwan	0.915583255825657	0.937783730098295	no
LOC105203081	whole_body_queen_taiwan	1.47527758250736	1.06668996414956	1.03199484332629	SBSb-virgin-queens-1	taiwan	2.09868480747585	-0.0244252372222371	no
LOC105203081	whole_body_queen_taiwan	1.47527758250736	0.95055516501472	0	SBSb-virgin-queens-2	taiwan	0.95055516501472	-0.963884800806843	no
LOC105203082	whole_body_queen_taiwan	56.2387834809963	36.4718910544892	55.8505786053651	SBSb-virgin-queens-4	taiwan	92.3224696598543	0.601366245962787	no
LOC105203082	whole_body_queen_taiwan	56.2387834809963	21	31	SBSb-virgin-queens-3	taiwan	52	0.540568381362703	no
LOC105203082	whole_body_queen_taiwan	56.2387834809963	12.8002795697947	19.6079020231994	SBSb-virgin-queens-1	taiwan	32.4081815929942	0.578500145725109	no
LOC105203082	whole_body_queen_taiwan	56.2387834809963	27.5660997854269	32.9114671765658	SBSb-virgin-queens-2	taiwan	60.4775669619927	0.247469129509656	no
LOC105203085	whole_body_queen_taiwan	1.03334498207478	1	0	SBSb-virgin-queens-3	taiwan	1	-1	no
LOC105203085	whole_body_queen_taiwan	1.03334498207478	0.911797276362229	0	SBSb-virgin-queens-4	taiwan	0.911797276362229	-0.934929550571406	no
LOC105203085	whole_body_queen_taiwan	1.03334498207478	0.95055516501472	0.914207421571271	SBSb-virgin-queens-2	taiwan	1.86476258658599	-0.0271376335436875	no
LOC105203085	whole_body_queen_taiwan	1.03334498207478	1.06668996414956	0	SBSb-virgin-queens-1	taiwan	1.06668996414956	-1.04732197815267	no
LOC105203086	whole_body_queen_taiwan	3.61468222913899	0.95055516501472	0.914207421571271	SBSb-virgin-queens-2	taiwan	1.86476258658599	-0.0271376335436875	no
LOC105203086	whole_body_queen_taiwan	3.61468222913899	2	0	SBSb-virgin-queens-3	taiwan	2	-1.58496250072116	no
LOC105203086	whole_body_queen_taiwan	3.61468222913899	2.13337992829912	3.09598452997886	SBSb-virgin-queens-1	taiwan	5.22936445827798	0.386490556626067	no
LOC105203086	whole_body_queen_taiwan	3.61468222913899	9.11797276362229	2.74674976747697	SBSb-virgin-queens-4	taiwan	11.8647225310993	-1.4332087273397	no
LOC105203087	whole_body_queen_taiwan	11.0877392139871	2.13337992829912	2.06398968665257	SBSb-virgin-queens-1	taiwan	4.19736961495169	-0.0323082686642103	no
LOC105203087	whole_body_queen_taiwan	11.0877392139871	14.5887564217957	12.8181655815592	SBSb-virgin-queens-4	taiwan	27.4069220033549	-0.173939738278258	no
LOC105203087	whole_body_queen_taiwan	11.0877392139871	4	6	SBSb-virgin-queens-3	taiwan	10	0.485426827170242	no
LOC105203087	whole_body_queen_taiwan	11.0877392139871	7.60444132011776	4.57103710785636	SBSb-virgin-queens-2	taiwan	12.1754784279741	-0.627135596600682	no
LOC105203090	whole_body_queen_taiwan	2.04934240373792	1.82359455272446	0.915583255825657	SBSb-virgin-queens-4	taiwan	2.73917780855012	-0.559749213054689	no
LOC105203090	whole_body_queen_taiwan	2.04934240373792	1.06668996414956	1.03199484332629	SBSb-virgin-queens-1	taiwan	2.09868480747585	-0.0244252372222371	no
LOC105203090	whole_body_queen_taiwan	2.04934240373792	0.95055516501472	0.914207421571271	SBSb-virgin-queens-2	taiwan	1.86476258658599	-0.0271376335436875	no
LOC105203090	whole_body_queen_taiwan	2.04934240373792	1	1	SBSb-virgin-queens-3	taiwan	2	0	no
LOC105203091	whole_body_queen_taiwan	95.8566101491837	38.4008387093841	45.4077731063566	SBSb-virgin-queens-1	taiwan	83.8086118157407	0.236140130867726	no
LOC105203091	whole_body_queen_taiwan	95.8566101491837	53.7960393053715	71.4154939544013	SBSb-virgin-queens-4	taiwan	125.211533259773	0.402226790092634	no
LOC105203091	whole_body_queen_taiwan	95.8566101491837	42.7749824256624	53.938237872705	SBSb-virgin-queens-2	taiwan	96.7132202983674	0.327704037690253	no
LOC105203091	whole_body_queen_taiwan	95.8566101491837	42	53	SBSb-virgin-queens-3	taiwan	95	0.328622747461371	no
LOC105203092	whole_body_queen_taiwan	22.3817594386847	10.0297700399845	13.7337488373849	SBSb-virgin-queens-4	taiwan	23.7635188773694	0.417721842227661	no
LOC105203092	whole_body_queen_taiwan	22.3817594386847	16.1594378052502	14.6273187451403	SBSb-virgin-queens-2	taiwan	30.7867565503906	-0.134932017200837	no
LOC105203092	whole_body_queen_taiwan	22.3817594386847	4.26675985659824	10.3199484332629	SBSb-virgin-queens-1	taiwan	14.5867082898611	1.10387980123068	no
LOC105203092	whole_body_queen_taiwan	22.3817594386847	13	8	SBSb-virgin-queens-3	taiwan	21	-0.637429920615292	no
LOC105203095	whole_body_queen_taiwan	1.91369026609394	1.90111033002944	1.82841484314254	SBSb-virgin-queens-2	taiwan	3.72952517317198	-0.0366114271590206	no
LOC105203095	whole_body_queen_taiwan	1.91369026609394	0.911797276362229	0.915583255825657	SBSb-virgin-queens-4	taiwan	1.82738053218789	0.002854179526889	no
LOC105203095	whole_body_queen_taiwan	1.91369026609394	1	1	SBSb-virgin-queens-3	taiwan	2	0	no
LOC105203095	whole_body_queen_taiwan	1.91369026609394	1.06668996414956	0	SBSb-virgin-queens-1	taiwan	1.06668996414956	-1.04732197815267	no
LOC105203096	whole_body_queen_taiwan	5.35575302742082	1.90111033002944	4.57103710785636	SBSb-virgin-queens-2	taiwan	6.4721474378858	0.941340762934095	no
LOC105203096	whole_body_queen_taiwan	5.35575302742082	1	2	SBSb-virgin-queens-3	taiwan	3	0.584962500721156	no
LOC105203096	whole_body_queen_taiwan	5.35575302742082	2.13337992829912	3.09598452997886	SBSb-virgin-queens-1	taiwan	5.22936445827798	0.386490556626067	no
LOC105203096	whole_body_queen_taiwan	5.35575302742082	2.73539182908669	2.74674976747697	SBSb-virgin-queens-4	taiwan	5.48214159656366	0.00438004380571571	no
LOC105203097	whole_body_queen_taiwan	2.43882740781655	0.95055516501472	1.82841484314254	SBSb-virgin-queens-2	taiwan	2.77897000815726	0.536108934705382	no
LOC105203097	whole_body_queen_taiwan	2.43882740781655	1	0	SBSb-virgin-queens-3	taiwan	1	-1	no
LOC105203097	whole_body_queen_taiwan	2.43882740781655	107.592078610743	89.7271590709144	SBSb-virgin-queens-4	taiwan	197.319237681657	-0.259312478106278	no
LOC105203097	whole_body_queen_taiwan	2.43882740781655	1.06668996414956	1.03199484332629	SBSb-virgin-queens-1	taiwan	2.09868480747585	-0.0244252372222371	no
LOC105204968	whole_body_queen_taiwan	3.9460998336502	1	2	SBSb-virgin-queens-3	taiwan	3	0.584962500721156	no
LOC105204968	whole_body_queen_taiwan	3.9460998336502	1.90111033002944	1.82841484314254	SBSb-virgin-queens-2	taiwan	3.72952517317198	-0.0366114271590206	no
LOC105204968	whole_body_queen_taiwan	3.9460998336502	1.06668996414956	3.09598452997886	SBSb-virgin-queens-1	taiwan	4.16267449412842	0.986888288316849	no
LOC105204968	whole_body_queen_taiwan	3.9460998336502	0.911797276362229	3.66233302330263	SBSb-virgin-queens-4	taiwan	4.57413029966486	1.28612250707166	no
LOC105204969	whole_body_queen_taiwan	33.5022348920861	2.13337992829912	4.12797937330515	SBSb-virgin-queens-1	taiwan	6.26135930160426	0.710670749053483	taiwan
LOC105204969	whole_body_queen_taiwan	33.5022348920861	12.7651618690712	43.9479962796316	SBSb-virgin-queens-4	taiwan	56.7131581487028	1.70723522863671	taiwan
LOC105204969	whole_body_queen_taiwan	33.5022348920861	11.4066619801766	25.5978078039956	SBSb-virgin-queens-2	taiwan	37.0044697841722	1.1001923337343	taiwan
LOC105204969	whole_body_queen_taiwan	33.5022348920861	8	22	SBSb-virgin-queens-3	taiwan	30	1.3536369546147	taiwan
LOC105204974	whole_body_queen_taiwan	1.03334498207478	0.911797276362229	0.915583255825657	SBSb-virgin-queens-4	taiwan	1.82738053218789	0.002854179526889	no
LOC105204974	whole_body_queen_taiwan	1.03334498207478	0	1	SBSb-virgin-queens-3	taiwan	1	1	no
LOC105204974	whole_body_queen_taiwan	1.03334498207478	1.06668996414956	0	SBSb-virgin-queens-1	taiwan	1.06668996414956	-1.04732197815267	no
LOC105204974	whole_body_queen_taiwan	1.03334498207478	0	0.914207421571271	SBSb-virgin-queens-2	taiwan	0.914207421571271	0.936747167263155	no
LOC105204975	whole_body_queen_taiwan	1.932381293293	1	1	SBSb-virgin-queens-3	taiwan	2	0	no
LOC105204975	whole_body_queen_taiwan	1.932381293293	0.911797276362229	0.915583255825657	SBSb-virgin-queens-4	taiwan	1.82738053218789	0.002854179526889	no
LOC105204975	whole_body_queen_taiwan	1.932381293293	0.95055516501472	0.914207421571271	SBSb-virgin-queens-2	taiwan	1.86476258658599	-0.0271376335436875	no
LOC105204975	whole_body_queen_taiwan	1.932381293293	1.06668996414956	1.03199484332629	SBSb-virgin-queens-1	taiwan	2.09868480747585	-0.0244252372222371	no
LOC105206526	whole_body_queen_taiwan	1.432381293293	1	0	SBSb-virgin-queens-3	taiwan	1	-1	no
LOC105206526	whole_body_queen_taiwan	1.432381293293	0.911797276362229	0	SBSb-virgin-queens-4	taiwan	0.911797276362229	-0.934929550571406	no
LOC105206526	whole_body_queen_taiwan	1.432381293293	1.06668996414956	1.03199484332629	SBSb-virgin-queens-1	taiwan	2.09868480747585	-0.0244252372222371	no
LOC105206526	whole_body_queen_taiwan	1.432381293293	0.95055516501472	0.914207421571271	SBSb-virgin-queens-2	taiwan	1.86476258658599	-0.0271376335436875	no
LOC105206534	whole_body_queen_taiwan	0.97527758250736	0.95055516501472	0	SBSb-virgin-queens-2	taiwan	0.95055516501472	-0.963884800806843	no
LOC105206534	whole_body_queen_taiwan	0.97527758250736	0.911797276362229	0	SBSb-virgin-queens-4	taiwan	0.911797276362229	-0.934929550571406	no
LOC105206534	whole_body_queen_taiwan	0.97527758250736	1	0	SBSb-virgin-queens-3	taiwan	1	-1	no
LOC105206534	whole_body_queen_taiwan	0.97527758250736	1.06668996414956	0	SBSb-virgin-queens-1	taiwan	1.06668996414956	-1.04732197815267	no
LOC105206540	whole_body_queen_taiwan	36.4300434848913	9.60020967734603	29.9278504564623	SBSb-virgin-queens-1	taiwan	39.5280601338083	1.54481376461768	no
LOC105206540	whole_body_queen_taiwan	36.4300434848913	17.109992970265	16.4557335882829	SBSb-virgin-queens-2	taiwan	33.5657265585479	-0.0530849979394647	no
LOC105206540	whole_body_queen_taiwan	36.4300434848913	18.2359455272446	21.0584148839901	SBSb-virgin-queens-4	taiwan	39.2943604112347	0.19752437682067	no
LOC105206540	whole_body_queen_taiwan	36.4300434848913	1	1	SBSb-virgin-queens-3	taiwan	2	0	no
LOC105206549	whole_body_queen_taiwan	22.5984802683157	7.29437821089783	11.9025823257335	SBSb-virgin-queens-4	taiwan	19.1969605366314	0.637454097324456	no
LOC105206549	whole_body_queen_taiwan	22.5984802683157	8.53351971319648	10.3199484332629	SBSb-virgin-queens-1	taiwan	18.8534681464593	0.247786534973072	no
LOC105206549	whole_body_queen_taiwan	22.5984802683157	17.109992970265	12.7989039019978	SBSb-virgin-queens-2	taiwan	29.9088968722628	-0.392232313330268	no
LOC105206549	whole_body_queen_taiwan	22.5984802683157	14	12	SBSb-virgin-queens-3	taiwan	26	-0.206450877467426	no
LOC105206559	whole_body_queen_taiwan	1.932381293293	1.06668996414956	1.03199484332629	SBSb-virgin-queens-1	taiwan	2.09868480747585	-0.0244252372222371	no
LOC105206559	whole_body_queen_taiwan	1.932381293293	0.911797276362229	0.915583255825657	SBSb-virgin-queens-4	taiwan	1.82738053218789	0.002854179526889	no
LOC105206559	whole_body_queen_taiwan	1.932381293293	0.95055516501472	0.914207421571271	SBSb-virgin-queens-2	taiwan	1.86476258658599	-0.0271376335436875	no
LOC105206559	whole_body_queen_taiwan	1.932381293293	1	1	SBSb-virgin-queens-3	taiwan	2	0	no
LOC105206574	whole_body_queen_taiwan	25.9484154965442	14.5887564217957	21.0584148839901	SBSb-virgin-queens-4	taiwan	35.6471713057858	0.500823279696051	no
LOC105206574	whole_body_queen_taiwan	25.9484154965442	11.4066619801766	17.3699410098542	SBSb-virgin-queens-2	taiwan	28.7766029900308	0.566231983915276	no
LOC105206574	whole_body_queen_taiwan	25.9484154965442	2	1	SBSb-virgin-queens-3	taiwan	3	-0.584962500721156	no
LOC105206574	whole_body_queen_taiwan	25.9484154965442	12.8002795697947	10.3199484332629	SBSb-virgin-queens-1	taiwan	23.1202280030576	-0.285830107654037	no
LOC105206590	whole_body_queen_taiwan	1.84796454911865	0.95055516501472	0.914207421571271	SBSb-virgin-queens-2	taiwan	1.86476258658599	-0.0271376335436875	no
LOC105206590	whole_body_queen_taiwan	1.84796454911865	0	1.83116651165131	SBSb-virgin-queens-4	taiwan	1.83116651165131	1.50139660211161	no
LOC105206590	whole_body_queen_taiwan	1.84796454911865	0	1	SBSb-virgin-queens-3	taiwan	1	1	no
LOC105206590	whole_body_queen_taiwan	1.84796454911865	1.06668996414956	1.03199484332629	SBSb-virgin-queens-1	taiwan	2.09868480747585	-0.0244252372222371	no
LOC105206598	whole_body_queen_taiwan	8.22952517317198	3.80222066005888	3.65682968628509	SBSb-virgin-queens-2	taiwan	7.45905034634397	-0.0443535767359868	no
LOC105206598	whole_body_queen_taiwan	8.22952517317198	4.26675985659824	2.06398968665257	SBSb-virgin-queens-1	taiwan	6.33074954325081	-0.781504238629094	no
LOC105206598	whole_body_queen_taiwan	8.22952517317198	5	4	SBSb-virgin-queens-3	taiwan	9	-0.263034405833794	no
LOC105206598	whole_body_queen_taiwan	8.22952517317198	5.47078365817337	3.66233302330263	SBSb-virgin-queens-4	taiwan	9.133116681476	-0.472888385841651	no
LOC105206612	whole_body_queen_taiwan	1.91369026609394	0	0.914207421571271	SBSb-virgin-queens-2	taiwan	0.914207421571271	0.936747167263155	no
LOC105206612	whole_body_queen_taiwan	1.91369026609394	0.911797276362229	0.915583255825657	SBSb-virgin-queens-4	taiwan	1.82738053218789	0.002854179526889	no
LOC105206612	whole_body_queen_taiwan	1.91369026609394	1.06668996414956	1.03199484332629	SBSb-virgin-queens-1	taiwan	2.09868480747585	-0.0244252372222371	no
LOC105206612	whole_body_queen_taiwan	1.91369026609394	1	1	SBSb-virgin-queens-3	taiwan	2	0	no
LOC105206620	whole_body_queen_taiwan	248.27676671429	102	128	SBSb-virgin-queens-3	taiwan	230	0.324726728240036	no
LOC105206620	whole_body_queen_taiwan	248.27676671429	119.769950791855	151.758431980831	SBSb-virgin-queens-2	taiwan	271.528382772686	0.33899047917699	no
LOC105206620	whole_body_queen_taiwan	248.27676671429	139.736385303592	123.839381199154	SBSb-virgin-queens-1	taiwan	263.575766502747	-0.172922252916722	no
LOC105206620	whole_body_queen_taiwan	248.27676671429	119.445443203452	113.532323722382	SBSb-virgin-queens-4	taiwan	232.977766925834	-0.0726249949706771	no
LOC105206630	whole_body_queen_taiwan	13.6183171639847	1	5	SBSb-virgin-queens-3	taiwan	6	1.58496250072116	no
LOC105206630	whole_body_queen_taiwan	13.6183171639847	7.46682974904692	3.09598452997886	SBSb-virgin-queens-1	taiwan	10.5628142790258	-1.04761161318334	no
LOC105206630	whole_body_queen_taiwan	13.6183171639847	5.70333099008832	10.9704890588553	SBSb-virgin-queens-2	taiwan	16.6738200489436	0.836532018729161	no
LOC105206630	whole_body_queen_taiwan	13.6183171639847	17.3241482508824	24.7207479072928	SBSb-virgin-queens-4	taiwan	42.0448961581751	0.489186453838013	no
LOC105206635	whole_body_queen_taiwan	16.1433231930884	10.6668996414956	9.28795358993658	SBSb-virgin-queens-1	taiwan	19.9548532314322	-0.181465190976191	no
LOC105206635	whole_body_queen_taiwan	16.1433231930884	2	4	SBSb-virgin-queens-3	taiwan	6	0.736965594166206	no
LOC105206635	whole_body_queen_taiwan	16.1433231930884	7.60444132011776	5.48524452942763	SBSb-virgin-queens-2	taiwan	13.0896858495454	-0.407920549156711	no
LOC105206635	whole_body_queen_taiwan	16.1433231930884	7.29437821089783	11.9025823257335	SBSb-virgin-queens-4	taiwan	19.1969605366314	0.637454097324456	no
LOC105206648	whole_body_queen_taiwan	1.90765887580036	1.06668996414956	2.06398968665257	SBSb-virgin-queens-1	taiwan	3.13067965080213	0.568089463026571	no
LOC105206648	whole_body_queen_taiwan	1.90765887580036	0	1	SBSb-virgin-queens-3	taiwan	1	1	no
LOC105206648	whole_body_queen_taiwan	1.90765887580036	1.90111033002944	0.914207421571271	SBSb-virgin-queens-2	taiwan	2.81531775160071	-0.59985799540809	no
LOC105206648	whole_body_queen_taiwan	1.90765887580036	0.911797276362229	0	SBSb-virgin-queens-4	taiwan	0.911797276362229	-0.934929550571406	no
LOC105206673	whole_body_queen_taiwan	2.03199484332629	0	2.06398968665257	SBSb-virgin-queens-1	taiwan	2.06398968665257	1.61541144117924	no
LOC105206673	whole_body_queen_taiwan	2.03199484332629	0	2	SBSb-virgin-queens-3	taiwan	2	1.58496250072116	no
LOC105206673	whole_body_queen_taiwan	2.03199484332629	0	1.83116651165131	SBSb-virgin-queens-4	taiwan	1.83116651165131	1.50139660211161	no
LOC105206673	whole_body_queen_taiwan	2.03199484332629	0	3.65682968628509	SBSb-virgin-queens-2	taiwan	3.65682968628509	2.21934811959757	no
LOC105206689	whole_body_queen_taiwan	95.6102834237952	62	52	SBSb-virgin-queens-3	taiwan	114	-0.249359468936717	no
LOC105206689	whole_body_queen_taiwan	95.6102834237952	53.2310892408243	49.3672007648487	SBSb-virgin-queens-2	taiwan	102.598290005673	-0.106635594210128	no
LOC105206689	whole_body_queen_taiwan	95.6102834237952	23.4671792112903	27.8638607698097	SBSb-virgin-queens-1	taiwan	51.3310399811	0.238416500012946	no
LOC105206689	whole_body_queen_taiwan	95.6102834237952	45.5898638181115	43.0324130238059	SBSb-virgin-queens-4	taiwan	88.6222768419173	-0.0814502057755838	no
LOC105206701	whole_body_queen_taiwan	0.97527758250736	0.95055516501472	0	SBSb-virgin-queens-2	taiwan	0.95055516501472	-0.963884800806843	no
LOC105206701	whole_body_queen_taiwan	0.97527758250736	1	0	SBSb-virgin-queens-3	taiwan	1	-1	no
LOC105206701	whole_body_queen_taiwan	0.97527758250736	1.06668996414956	0	SBSb-virgin-queens-1	taiwan	1.06668996414956	-1.04732197815267	no
LOC105206701	whole_body_queen_taiwan	0.97527758250736	0	0	SBSb-virgin-queens-4	taiwan	0	0	no
LOC105206711	whole_body_queen_taiwan	0.97527758250736	0	1.03199484332629	SBSb-virgin-queens-1	taiwan	1.03199484332629	1.02289674093044	no
LOC105206711	whole_body_queen_taiwan	0.97527758250736	0.95055516501472	0	SBSb-virgin-queens-2	taiwan	0.95055516501472	-0.963884800806843	no
LOC105206711	whole_body_queen_taiwan	0.97527758250736	0.911797276362229	0	SBSb-virgin-queens-4	taiwan	0.911797276362229	-0.934929550571406	no
LOC105206711	whole_body_queen_taiwan	0.97527758250736	0	1	SBSb-virgin-queens-3	taiwan	1	1	no
LOC105207370	whole_body_queen_taiwan	2.04934240373792	0.911797276362229	1.83116651165131	SBSb-virgin-queens-4	taiwan	2.74296378801354	0.566467051540207	no
LOC105207370	whole_body_queen_taiwan	2.04934240373792	0.95055516501472	0.914207421571271	SBSb-virgin-queens-2	taiwan	1.86476258658599	-0.0271376335436875	no
LOC105207370	whole_body_queen_taiwan	2.04934240373792	1	1	SBSb-virgin-queens-3	taiwan	2	0	no
LOC105207370	whole_body_queen_taiwan	2.04934240373792	1.06668996414956	1.03199484332629	SBSb-virgin-queens-1	taiwan	2.09868480747585	-0.0244252372222371	no
LOC105207387	whole_body_queen_taiwan	1.84417856965522	6	7	SBSb-virgin-queens-3	taiwan	13	0.192645077942396	no
LOC105207387	whole_body_queen_taiwan	1.84417856965522	1.82359455272446	0	SBSb-virgin-queens-4	taiwan	1.82359455272446	-1.49753294315298	no
LOC105207387	whole_body_queen_taiwan	1.84417856965522	0.95055516501472	0.914207421571271	SBSb-virgin-queens-2	taiwan	1.86476258658599	-0.0271376335436875	no
LOC105207387	whole_body_queen_taiwan	1.84417856965522	0	1.03199484332629	SBSb-virgin-queens-1	taiwan	1.03199484332629	1.02289674093044	no
LOC105207396	whole_body_queen_taiwan	30.1907936523309	14.9336594980938	14.447927806568	SBSb-virgin-queens-1	taiwan	29.3815873046618	-0.0446643227923773	no
LOC105207396	whole_body_queen_taiwan	30.1907936523309	18.2359455272446	16.4804986048618	SBSb-virgin-queens-4	taiwan	34.7164441321064	-0.13805840975202	no
LOC105207396	whole_body_queen_taiwan	30.1907936523309	10.4561068151619	16.4557335882829	SBSb-virgin-queens-2	taiwan	26.9118404034448	0.607584139072104	no
LOC105207396	whole_body_queen_taiwan	30.1907936523309	15	16	SBSb-virgin-queens-3	taiwan	31	0.0874628412503394	no
LOC105207402	whole_body_queen_taiwan	328.923119918535	200.567139818106	178.270447206398	SBSb-virgin-queens-2	taiwan	378.837587024504	-0.169122785758822	no
LOC105207402	whole_body_queen_taiwan	328.923119918535	173	176	SBSb-virgin-queens-3	taiwan	349	0.024662054234269	no
LOC105207402	whole_body_queen_taiwan	328.923119918535	149.534753323406	159.311486513664	SBSb-virgin-queens-4	taiwan	308.84623983707	0.0907812057009332	no
LOC105207402	whole_body_queen_taiwan	328.923119918535	137.603005375293	158.927205872248	SBSb-virgin-queens-1	taiwan	296.530211247541	0.206456842206922	no
LOC105207412	whole_body_queen_taiwan	81.7163995854953	52.8842420290093	32.9609972097237	SBSb-virgin-queens-4	taiwan	85.8452392387329	-0.665984609307401	no
LOC105207412	whole_body_queen_taiwan	81.7163995854953	44.6760927556919	32.9114671765658	SBSb-virgin-queens-2	taiwan	77.5875599322576	-0.429666040544275	no
LOC105207412	whole_body_queen_taiwan	81.7163995854953	56.5345680999267	35.0878246730937	SBSb-virgin-queens-1	taiwan	91.6223927730204	-0.672916839041036	no
LOC105207412	whole_body_queen_taiwan	81.7163995854953	34	29	SBSb-virgin-queens-3	taiwan	63	-0.222392421336448	no
LOC105207423	whole_body_queen_taiwan	1.44703524816872	0.95055516501472	0.914207421571271	SBSb-virgin-queens-2	taiwan	1.86476258658599	-0.0271376335436875	no
LOC105207423	whole_body_queen_taiwan	1.44703524816872	1.06668996414956	0	SBSb-virgin-queens-1	taiwan	1.06668996414956	-1.04732197815267	no
LOC105207423	whole_body_queen_taiwan	1.44703524816872	0.911797276362229	0.915583255825657	SBSb-virgin-queens-4	taiwan	1.82738053218789	0.002854179526889	no
LOC105207423	whole_body_queen_taiwan	1.44703524816872	1	0	SBSb-virgin-queens-3	taiwan	1	-1	no
LOC105207434	whole_body_queen_taiwan	10.4237895955076	8	5	SBSb-virgin-queens-3	taiwan	13	-0.584962500721156	no
LOC105207434	whole_body_queen_taiwan	10.4237895955076	5.47078365817337	3.66233302330263	SBSb-virgin-queens-4	taiwan	9.133116681476	-0.472888385841651	no
LOC105207434	whole_body_queen_taiwan	10.4237895955076	3.80222066005888	5.48524452942763	SBSb-virgin-queens-2	taiwan	9.28746518948651	0.43345927671575	no
LOC105207434	whole_body_queen_taiwan	10.4237895955076	6.40013978489736	5.15997421663143	SBSb-virgin-queens-1	taiwan	11.5601140015288	-0.264628210432367	no
LOC105207450	whole_body_queen_taiwan	559.875992387621	171	221	SBSb-virgin-queens-3	taiwan	392	0.368151111648008	no
LOC105207450	whole_body_queen_taiwan	559.875992387621	288.01821499946	439.733769775782	SBSb-virgin-queens-2	taiwan	727.751984775242	0.608747023032197	no
LOC105207450	whole_body_queen_taiwan	559.875992387621	165.035307021563	179.454318141829	SBSb-virgin-queens-4	taiwan	344.489625163392	0.120143606363379	no
LOC105207450	whole_body_queen_taiwan	559.875992387621	379.741627237243	485.037576363355	SBSb-virgin-queens-1	taiwan	864.779203600598	0.35225554403252	no
LOC105207460	whole_body_queen_taiwan	27.1631161908355	10.4561068151619	14.6273187451403	SBSb-virgin-queens-2	taiwan	25.0834255603023	0.447953420118453	no
LOC105207460	whole_body_queen_taiwan	27.1631161908355	20.059540079969	21.9739981398158	SBSb-virgin-queens-4	taiwan	42.0335382197848	0.125528019567829	no
LOC105207460	whole_body_queen_taiwan	27.1631161908355	1	2	SBSb-virgin-queens-3	taiwan	3	0.584962500721156	no
LOC105207460	whole_body_queen_taiwan	27.1631161908355	10.6668996414956	18.5759071798732	SBSb-virgin-queens-1	taiwan	29.2428068213687	0.74665793531954	no
LOC105207466	whole_body_queen_taiwan	1.41558325582566	0	1.83116651165131	SBSb-virgin-queens-4	taiwan	1.83116651165131	1.50139660211161	no
LOC105207466	whole_body_queen_taiwan	1.41558325582566	2.13337992829912	0	SBSb-virgin-queens-1	taiwan	2.13337992829912	-1.64771970984345	no
LOC105207466	whole_body_queen_taiwan	1.41558325582566	0	0.914207421571271	SBSb-virgin-queens-2	taiwan	0.914207421571271	0.936747167263155	no
LOC105207466	whole_body_queen_taiwan	1.41558325582566	0	1	SBSb-virgin-queens-3	taiwan	1	1	no
LOC105207472	whole_body_queen_taiwan	0.97527758250736	0.911797276362229	0	SBSb-virgin-queens-4	taiwan	0.911797276362229	-0.934929550571406	no
LOC105207472	whole_body_queen_taiwan	0.97527758250736	1	0	SBSb-virgin-queens-3	taiwan	1	-1	no
LOC105207472	whole_body_queen_taiwan	0.97527758250736	1.06668996414956	1.03199484332629	SBSb-virgin-queens-1	taiwan	2.09868480747585	-0.0244252372222371	no
LOC105207472	whole_body_queen_taiwan	0.97527758250736	0.95055516501472	0	SBSb-virgin-queens-2	taiwan	0.95055516501472	-0.963884800806843	no
LOC105207481	whole_body_queen_taiwan	3.36476258658599	1.82359455272446	0.915583255825657	SBSb-virgin-queens-4	taiwan	2.73917780855012	-0.559749213054689	no
LOC105207481	whole_body_queen_taiwan	3.36476258658599	1.90111033002944	1.82841484314254	SBSb-virgin-queens-2	taiwan	3.72952517317198	-0.0366114271590206	no
LOC105207481	whole_body_queen_taiwan	3.36476258658599	2	1	SBSb-virgin-queens-3	taiwan	3	-0.584962500721156	no
LOC105207481	whole_body_queen_taiwan	3.36476258658599	2.13337992829912	2.06398968665257	SBSb-virgin-queens-1	taiwan	4.19736961495169	-0.0323082686642103	no
LOC105207492	whole_body_queen_taiwan	113.600805822577	17.067039426393	30.9598452997886	SBSb-virgin-queens-1	taiwan	48.0268847261815	0.82290030808697	taiwan
LOC105207492	whole_body_queen_taiwan	113.600805822577	29.4672101154563	98.7344015296973	SBSb-virgin-queens-2	taiwan	128.201611645154	1.71083382294275	taiwan
LOC105207492	whole_body_queen_taiwan	113.600805822577	23	76	SBSb-virgin-queens-3	taiwan	99	1.68182403997375	taiwan
LOC105207492	whole_body_queen_taiwan	113.600805822577	44.6780665417492	93.389492094217	SBSb-virgin-queens-4	taiwan	138.067558635966	1.04712467487789	taiwan
LOC105207526	whole_body_queen_taiwan	33.7501205504193	20.2671093188416	18.5759071798732	SBSb-virgin-queens-1	taiwan	38.8430164987148	-0.119544785801845	no
LOC105207526	whole_body_queen_taiwan	33.7501205504193	13.6769591454334	6.4090827907796	SBSb-virgin-queens-4	taiwan	20.086041936213	-0.986186233594223	no
LOC105207526	whole_body_queen_taiwan	33.7501205504193	26.6155446204122	11.8846964804265	SBSb-virgin-queens-2	taiwan	38.5002411008387	-1.09982202720786	no
LOC105207526	whole_body_queen_taiwan	33.7501205504193	20	9	SBSb-virgin-queens-3	taiwan	29	-1.0703893278914	no
LOC105207534	whole_body_queen_taiwan	0.97527758250736	2.13337992829912	0	SBSb-virgin-queens-1	taiwan	2.13337992829912	-1.64771970984345	no
LOC105207534	whole_body_queen_taiwan	0.97527758250736	1	0	SBSb-virgin-queens-3	taiwan	1	-1	no
LOC105207534	whole_body_queen_taiwan	0.97527758250736	0.911797276362229	0	SBSb-virgin-queens-4	taiwan	0.911797276362229	-0.934929550571406	no
LOC105207534	whole_body_queen_taiwan	0.97527758250736	0.95055516501472	0	SBSb-virgin-queens-2	taiwan	0.95055516501472	-0.963884800806843	no
LOC105207542	whole_body_queen_taiwan	1.00862256458214	1.06668996414956	0	SBSb-virgin-queens-1	taiwan	1.06668996414956	-1.04732197815267	no
LOC105207542	whole_body_queen_taiwan	1.00862256458214	0.95055516501472	0	SBSb-virgin-queens-2	taiwan	0.95055516501472	-0.963884800806843	no
LOC105207542	whole_body_queen_taiwan	1.00862256458214	2	0	SBSb-virgin-queens-3	taiwan	2	-1.58496250072116	no
LOC105207542	whole_body_queen_taiwan	1.00862256458214	0.911797276362229	0	SBSb-virgin-queens-4	taiwan	0.911797276362229	-0.934929550571406	no
LOC105207561	whole_body_queen_taiwan	1.45055516501472	1.90111033002944	0	SBSb-virgin-queens-2	taiwan	1.90111033002944	-1.53660516267125	no
LOC105207561	whole_body_queen_taiwan	1.45055516501472	0	2.06398968665257	SBSb-virgin-queens-1	taiwan	2.06398968665257	1.61541144117924	no
LOC105207561	whole_body_queen_taiwan	1.45055516501472	0	1	SBSb-virgin-queens-3	taiwan	1	1	no
LOC105207561	whole_body_queen_taiwan	1.45055516501472	0.911797276362229	0	SBSb-virgin-queens-4	taiwan	0.911797276362229	-0.934929550571406	no
LOC105207569	whole_body_queen_taiwan	1.01599742166314	0	1.03199484332629	SBSb-virgin-queens-1	taiwan	1.03199484332629	1.02289674093044	no
LOC105207569	whole_body_queen_taiwan	1.01599742166314	0.95055516501472	0.914207421571271	SBSb-virgin-queens-2	taiwan	1.86476258658599	-0.0271376335436875	no
LOC105207569	whole_body_queen_taiwan	1.01599742166314	0	0.915583255825657	SBSb-virgin-queens-4	taiwan	0.915583255825657	0.937783730098295	no
LOC105207569	whole_body_queen_taiwan	1.01599742166314	1	0	SBSb-virgin-queens-3	taiwan	1	-1	no
LOC105207577	whole_body_queen_taiwan	0.457103710785636	0	0	SBSb-virgin-queens-1	taiwan	0	0	no
LOC105207577	whole_body_queen_taiwan	0.457103710785636	0	0.914207421571271	SBSb-virgin-queens-2	taiwan	0.914207421571271	0.936747167263155	no
LOC105207577	whole_body_queen_taiwan	0.457103710785636	0	0	SBSb-virgin-queens-3	taiwan	0	0	no
LOC105207577	whole_body_queen_taiwan	0.457103710785636	0.911797276362229	1.83116651165131	SBSb-virgin-queens-4	taiwan	2.74296378801354	0.566467051540207	no
LOC105207586	whole_body_queen_taiwan	1.44703524816872	0	1	SBSb-virgin-queens-3	taiwan	1	1	no
LOC105207586	whole_body_queen_taiwan	1.44703524816872	1.06668996414956	0	SBSb-virgin-queens-1	taiwan	1.06668996414956	-1.04732197815267	no
LOC105207586	whole_body_queen_taiwan	1.44703524816872	0.95055516501472	0.914207421571271	SBSb-virgin-queens-2	taiwan	1.86476258658599	-0.0271376335436875	no
LOC105207586	whole_body_queen_taiwan	1.44703524816872	0.911797276362229	0.915583255825657	SBSb-virgin-queens-4	taiwan	1.82738053218789	0.002854179526889	no
LOC105207603	whole_body_queen_taiwan	1.42779469802537	0.95055516501472	0	SBSb-virgin-queens-2	taiwan	0.95055516501472	-0.963884800806843	no
LOC105207603	whole_body_queen_taiwan	1.42779469802537	1	1	SBSb-virgin-queens-3	taiwan	2	0	no
LOC105207603	whole_body_queen_taiwan	1.42779469802537	0	1.03199484332629	SBSb-virgin-queens-1	taiwan	1.03199484332629	1.02289674093044	no
LOC105207603	whole_body_queen_taiwan	1.42779469802537	1.82359455272446	0	SBSb-virgin-queens-4	taiwan	1.82359455272446	-1.49753294315298	no
LOC105207609	whole_body_queen_taiwan	1.88948500407863	2.13337992829912	1.03199484332629	SBSb-virgin-queens-1	taiwan	3.16537477162541	-0.624822968913018	no
LOC105207609	whole_body_queen_taiwan	1.88948500407863	0.95055516501472	1.82841484314254	SBSb-virgin-queens-2	taiwan	2.77897000815726	0.536108934705382	no
LOC105207609	whole_body_queen_taiwan	1.88948500407863	1	0	SBSb-virgin-queens-3	taiwan	1	-1	no
LOC105207609	whole_body_queen_taiwan	1.88948500407863	0.911797276362229	0	SBSb-virgin-queens-4	taiwan	0.911797276362229	-0.934929550571406	no
