# Supplementary material for: Genomic architecture and evolutionary antagonism drive allelic expression bias in the social supergene of red fire ants
Source: eLife journal article supplement (doi:10.7554/elife.55862), 2020-08-10
Supplement: supp [file elife-55862-supp-v1.zip › elife_poa_e55862_Figure_1_source_data_1.csv]

refseq_id	body_part	median_expression	mean_lfc	sd_lfc	littleb_expression	bigB_expression	sample_id	population	total_expression	lfc_SB-Sb	normalized_lfc	significant
LOC105193132	QA	8.91230760178199	0.297259275323424	1.07755291546055	4.73517623247192	7.93008239300908	112BQA	south_america	12.665258625481	0.638835667817024	0.316992685549563	sa
LOC105193132	QA	8.91230760178199	0.297259275323424	1.07755291546055	1.37396431016094	2.38095623422992	114CQA	south_america	3.75492054439086	0.51013309509467	0.197553008039761	sa
LOC105193132	QA	8.91230760178199	0.297259275323424	1.07755291546055	3.02781023905836	10.7270487964357	111BQA	south_america	13.754859035494	1.54177237272421	1.15494383574554	sa
LOC105193132	QA	8.91230760178199	0.297259275323424	1.07755291546055	4.15673140861882	2.86054634571618	43QA	south_america	7.017277754335	-0.417651871284794	-0.663458041225442	sa
LOC105193132	QA	8.91230760178199	0.297259275323424	1.07755291546055	3.78917809047816	7.01815935875083	3QA	south_america	10.807337449229	0.743493006287917	0.414117696274593	sa
LOC105193132	QA	8.91230760178199	0.297259275323424	1.07755291546055	1.25949248616452	3.13660844072176	118QA	south_america	4.39610092688628	0.872449643332529	0.533793152759712	sa
LOC105193132	QH	5.2948790744379	-0.156919105199937	1.54693179210804	0	4.54701370857379	114CQH	south_america	4.54701370857379	2.47171129086204	1.69925423310351	sa
LOC105193132	QH	5.2948790744379	-0.156919105199937	1.54693179210804	1.36410411257214	3.41026028143035	111BQH	south_america	4.77436439400248	0.899570230554287	0.682957930753057	sa
LOC105193132	QH	5.2948790744379	-0.156919105199937	1.54693179210804	1.70513014071517	5.81539375487333	112BQH	south_america	7.5205238955885	1.33309900806259	0.963208669486354	sa
LOC105193132	QH	5.2948790744379	-0.156919105199937	1.54693179210804	0	5.81539375487332	43QH	south_america	5.81539375487332	2.76879701019158	1.89130259673866	sa
LOC105193132	QH	5.2948790744379	-0.156919105199937	1.54693179210804	0	2.38095623422992	118QH	south_america	2.38095623422992	1.75743134096713	1.23751445017388	sa
LOC105193132	QH	5.2948790744379	-0.156919105199937	1.54693179210804	3.57143435134488	3.69487236321673	3QH	south_america	7.26630671456161	0.0384390346730113	0.126287494296519	sa
LOC105193132	QT	3.4324107296067	0.182227205719409	1.1287051691787	1.43027317285809	2.55798855915004	43QT	south_america	3.98826173200813	0.549943383674982	0.325785854443408	sa
LOC105193132	QT	3.4324107296067	0.182227205719409	1.1287051691787	1.8815229138926	2.07373607497445	111BQT	south_america	3.95525898886705	0.0931618018653467	-0.0789093611743364	sa
LOC105193132	QT	3.4324107296067	0.182227205719409	1.1287051691787	0.403076985078189	2.50648548526815	112BQT	south_america	2.90956247034634	1.32143158613638	1.00930199623868	sa
LOC105193132	QT	3.4324107296067	0.182227205719409	1.1287051691787	1.1678696636368	1.17952258130266	118QT	south_america	2.34739224493946	0.00773412926361629	-0.154595798106216	sa
LOC105193132	QT	3.4324107296067	0.182227205719409	1.1287051691787	2.49231160923143	6.76692824465346	3QT	south_america	9.25923985388489	1.15316184520664	0.860219892670231	sa
LOC105193132	QT	3.4324107296067	0.182227205719409	1.1287051691787	0	0.969232292478887	114CQT	south_america	0.969232292478887	0.97763330293098	0.704706701919641	sa
LOC105193132	W	4.40121280212393	0.127073279071061	1.3566622902154	0.64881647979822	2.45867297607747	112W	south_america	3.10748945587569	1.06878778098506	0.694140692717626	sa
LOC105193132	W	4.40121280212393	0.127073279071061	1.3566622902154	1.94872016081734	8.35495161756051	104W	south_america	10.3036717783779	1.66564127770048	1.13408326429206	sa
LOC105193132	W	4.40121280212393	0.127073279071061	1.3566622902154	0	5.04202496660454	114W	south_america	5.04202496660454	2.59503214552268	1.8191401679336	sa
LOC105193132	W	4.40121280212393	0.127073279071061	1.3566622902154	1.55077166796622	4.92649648428897	43CW	south_america	6.47726815225519	1.21624572916396	0.802832405638676	sa
LOC105193132	W	4.40121280212393	0.127073279071061	1.3566622902154	0.437318492001414	3.3230821456419	28W	south_america	3.76040063764331	1.58868046946558	1.07735521281605	sa
LOC105193132	W	4.40121280212393	0.127073279071061	1.3566622902154	0	2.50648548526815	3BW	south_america	2.50648548526815	1.81002575613728	1.24050951309262	sa
LOC105193132	whole_body_queen	20.3895380964184	0.0471818512520358	0.742792715921167	21.571794077634	15.8797177700773	Queen5	north_america	37.4515118477112	-0.41923031075855	-0.627916984124123	no
LOC105193132	whole_body_queen	20.3895380964184	0.0471818512520358	0.742792715921167	5.72268687250345	9.5472412692573	Queen4	north_america	15.2699281417608	0.649755838949828	0.811227647743578	no
LOC105193132	whole_body_queen	20.3895380964184	0.0471818512520358	0.742792715921167	16.6592967216758	3.91983452274725	Queen1	north_america	20.5791312444231	-1.84374619220863	-2.54570084349259	no
LOC105193132	whole_body_queen	20.3895380964184	0.0471818512520358	0.742792715921167	12.3065643321393	5.9781835141812	Queen3	north_america	18.2847478463205	-0.931214681374592	-1.31718649315681	no
LOC105193132	whole_body_queen	20.3895380964184	0.0471818512520358	0.742792715921167	17.7868630912486	10.1444279102952	Queen6	north_america	27.9312910015438	-0.753401636012095	-1.077802016773	no
LOC105193132	whole_body_queen	20.3895380964184	0.0471818512520358	0.742792715921167	12.0629338415197	8.13701110689397	Queen2	north_america	20.1999449484136	-0.51568473815568	-0.757770744573986	no
LOC105193132	whole_body_queen_taiwan	32.7353829292551	-0.0665560256069044	0.739710216204057	16.4123509745201	21.0584148839901	SBSb-virgin-queens-4	taiwan	37.4707658585102	0.341218117279943	0.551262013088593	no
LOC105193132	whole_body_queen_taiwan	32.7353829292551	-0.0665560256069044	0.739710216204057	15.2088826402355	6.3994519509989	SBSb-virgin-queens-2	taiwan	21.6083345912344	-1.13129431713368	-1.43939919741902	no
LOC105193132	whole_body_queen_taiwan	32.7353829292551	-0.0665560256069044	0.739710216204057	12	16	SBSb-virgin-queens-3	taiwan	28	0.387023123109247	0.613184918607406	no
LOC105193132	whole_body_queen_taiwan	32.7353829292551	-0.0665560256069044	0.739710216204057	20.2671093188416	17.5439123365469	SBSb-virgin-queens-1	taiwan	37.8110216553885	-0.197678300381134	-0.177261678832969	no
LOC105193134	QA	37.8809927150051	0.297259275323424	1.07755291546055	14.4841635908919	30.5819322970372	118QA	south_america	45.0660958879292	1.02830598824593	0.678432309386915	all
LOC105193134	QA	37.8809927150051	0.297259275323424	1.07755291546055	0.686982155080468	1.19047811711496	114CQA	south_america	1.87746027219543	0.376801089344715	0.0738170839501603	all
LOC105193134	QA	37.8809927150051	0.297259275323424	1.07755291546055	3.46394284051568	32.896282975736	43QA	south_america	36.3602258162517	2.92473661878068	2.43837430696782	all
LOC105193134	QA	37.8809927150051	0.297259275323424	1.07755291546055	8.6508863973096	30.7508732164489	111BQA	south_america	39.4017596137585	1.71806290996202	1.31854650871725	all
LOC105193134	QA	37.8809927150051	0.297259275323424	1.07755291546055	5.30484932666942	42.108956152505	3QA	south_america	47.4138054791744	2.77345383073709	2.29797954224396	all
LOC105193134	QA	37.8809927150051	0.297259275323424	1.07755291546055	3.87423509929521	16.917509105086	112BQA	south_america	20.7917442043812	1.87812234419068	1.46708625273552	all
LOC105193134	QH	44.0694388871971	-0.156919105199937	1.54693179210804	17.0513014071517	31.9846656518033	112BQH	south_america	49.035967058955	0.869692629300594	0.663643826921124	all
LOC105193134	QH	44.0694388871971	-0.156919105199937	1.54693179210804	20.762127353543	33.3333872792189	118QH	south_america	54.095514632762	0.657792604469788	0.526662981410124	all
LOC105193134	QH	44.0694388871971	-0.156919105199937	1.54693179210804	14.2857374053795	16.6269256344753	3QH	south_america	30.9126630398548	0.20559472025128	0.234343768290657	all
LOC105193134	QH	44.0694388871971	-0.156919105199937	1.54693179210804	19.0974575760099	40.9231233771641	111BQH	south_america	60.0205809531741	1.06073320009375	0.78714026791987	all
LOC105193134	QH	44.0694388871971	-0.156919105199937	1.54693179210804	10.0259419410726	29.0769687743666	43QH	south_america	39.1029107154392	1.44775726642786	1.0373284587041	all
LOC105193134	QH	44.0694388871971	-0.156919105199937	1.54693179210804	10.0259419410726	9.09402741714759	114CQH	south_america	19.1199693582202	-0.127399999444582	0.0190823576746901	all
LOC105193134	QT	50.8210779502864	0.182227205719409	1.1287051691787	12.0923095523457	30.0778258232178	112BQT	south_america	42.1701353755635	1.24716595889129	0.943504807324289	all
LOC105193134	QT	50.8210779502864	0.182227205719409	1.1287051691787	21.0216539454623	32.9538979442822	114CQT	south_america	53.9755518897445	0.624654379750333	0.391977627206984	all
LOC105193134	QT	50.8210779502864	0.182227205719409	1.1287051691787	3.76304582778521	15.5530205623084	111BQT	south_america	19.3160663900936	1.79713816636602	1.43076421083612	all
LOC105193134	QT	50.8210779502864	0.182227205719409	1.1287051691787	4.98462321846285	49.6241404607921	3QT	south_america	54.6087636792549	3.08049318224998	2.5677794836711	all
LOC105193134	QT	50.8210779502864	0.182227205719409	1.1287051691787	27.4449370954647	61.9249355183897	118QT	south_america	89.3698726138544	1.1454599424124	0.853396230473447	all
LOC105193134	QT	50.8210779502864	0.182227205719409	1.1287051691787	9.29677562357758	38.3698283872506	43QT	south_america	47.6666040108282	1.9348977873911	1.55281523424493	all
LOC105193134	W	42.32720289113	0.127073279071061	1.3566622902154	8.31346281723764	30.2521497996272	114W	south_america	38.5656126168649	1.74656585675574	1.19373302358655	all
LOC105193134	W	42.32720289113	0.127073279071061	1.3566622902154	0	15.0389129116089	3BW	south_america	15.0389129116089	4.00350445674384	2.85732949580055	all
LOC105193134	W	42.32720289113	0.127073279071061	1.3566622902154	11.8075992840382	42.0923738447974	28W	south_america	53.8999731288356	1.75043249933329	1.19658313787471	all
LOC105193134	W	42.32720289113	0.127073279071061	1.3566622902154	9.30463000779732	72.6658231432623	43CW	south_america	81.9704531510597	2.83770273882843	1.99801341815656	all
LOC105193134	W	42.32720289113	0.127073279071061	1.3566622902154	5.83934831818398	22.7427250287166	112W	south_america	28.5820733469005	1.79555475648735	1.22984289417478	all
LOC105193134	W	42.32720289113	0.127073279071061	1.3566622902154	6.82052056286069	39.2682726025344	104W	south_america	46.0887931653951	2.36430703901052	1.64907197323533	all
LOC105193134	whole_body_queen	28.4939052830776	0.0471818512520358	0.742792715921167	8.58403030875517	27.6869996808462	Queen4	north_america	36.2710299896014	1.58169271158705	2.06586686627912	all
LOC105193134	whole_body_queen	28.4939052830776	0.0471818512520358	0.742792715921167	8.37028851352876	18.2599702385314	Queen6	north_america	26.6302587520602	1.03944009923621	1.33584811309524	all
LOC105193134	whole_body_queen	28.4939052830776	0.0471818512520358	0.742792715921167	7.75474318383408	22.602808630261	Queen2	north_america	30.3575518140951	1.43082178052777	1.86275376645263	all
LOC105193134	whole_body_queen	28.4939052830776	0.0471818512520358	0.742792715921167	11.3599055373594	23.9127340567248	Queen3	north_america	35.2726395940841	1.01121564209307	1.29785035606535	all
LOC105193134	whole_body_queen	28.4939052830776	0.0471818512520358	0.742792715921167	5.39294851940849	17.9970134727542	Queen5	north_america	23.3899619921627	1.57121924839255	2.05176675063445	all
LOC105193134	whole_body_queen	28.4939052830776	0.0471818512520358	0.742792715921167	5.87975178412087	12.7394621989286	Queen1	north_america	18.6192139830494	0.997897114423519	1.27992001374497	all
LOC105193134	whole_body_queen_taiwan	2.84658871486427	-0.0665560256069044	0.739710216204057	0.95055516501472	2.74262226471381	SBSb-virgin-queens-2	taiwan	3.69317742972853	0.940164646489563	1.36096629469661	all
LOC105193134	whole_body_queen_taiwan	2.84658871486427	-0.0665560256069044	0.739710216204057	1	1	SBSb-virgin-queens-3	taiwan	2	0	0.089975809646712	all
LOC105193134	whole_body_queen_taiwan	2.84658871486427	-0.0665560256069044	0.739710216204057	0.911797276362229	0.915583255825657	SBSb-virgin-queens-4	taiwan	1.82738053218789	0.002854179526889	0.0938343199989627	all
LOC105193134	whole_body_queen_taiwan	2.84658871486427	-0.0665560256069044	0.739710216204057	6.40013978489736	6.19196905995772	SBSb-virgin-queens-1	taiwan	12.5921088448551	-0.0411657084252941	0.0343246809702114	all
LOC105193135	QA	11.3481359892934	0.297259275323424	1.07755291546055	8.6508863973096	2.86054634571618	111BQA	south_america	11.5114327430258	-1.32185642194202	-1.50258578862778	all
LOC105193135	QA	11.3481359892934	0.297259275323424	1.07755291546055	7.74847019859042	3.4363690369706	112BQA	south_america	11.184839235561	-0.979651381801652	-1.1850097000381	all
LOC105193135	QA	11.3481359892934	0.297259275323424	1.07755291546055	5.54230854482509	11.4421853828647	43QA	south_america	16.9844939276898	0.927368201278618	0.584759149100242	all
LOC105193135	QA	11.3481359892934	0.297259275323424	1.07755291546055	13.8544173478097	3.13660844072176	118QA	south_america	16.9910257885315	-1.84437170991979	-1.98749495687447	all
LOC105193135	QA	11.3481359892934	0.297259275323424	1.07755291546055	6.82052056286069	2.00518838821452	3QA	south_america	8.82570895107521	-1.37980920892173	-1.5563676365057	all
LOC105193135	QA	11.3481359892934	0.297259275323424	1.07755291546055	4.80887508556328	2.38095623422992	114CQA	south_america	7.1898313197932	-0.780827465414677	-1.00049540516284	all
LOC105193135	QH	13.9905090721933	-0.156919105199937	1.54693179210804	6.82052056286069	6.82052056286069	111BQH	south_america	13.6410411257214	-1.60171325190746e-16	0.101438929628629	all
LOC105193135	QH	13.9905090721933	-0.156919105199937	1.54693179210804	7.51945645580446	6.82052056286069	114CQH	south_america	14.3399770186651	-0.123496747094188	0.0216055796876496	all
LOC105193135	QH	13.9905090721933	-0.156919105199937	1.54693179210804	10.0259419410726	20.3538781420566	43QH	south_america	30.3798200831292	0.953596196016595	0.717882525190854	all
LOC105193135	QH	13.9905090721933	-0.156919105199937	1.54693179210804	9.08343071717508	2.38095623422992	118QH	south_america	11.464386951405	-1.57648332892586	-0.917664392811688	all
LOC105193135	QH	13.9905090721933	-0.156919105199937	1.54693179210804	6.82052056286069	2.90769687743666	112BQH	south_america	9.72821744029735	-1.00094608099964	-0.545613568811287	all
LOC105193135	QH	13.9905090721933	-0.156919105199937	1.54693179210804	7.14286870268977	7.38974472643346	3QH	south_america	14.5326134291232	0.0430897744598224	0.129293922770314	all
LOC105193135	QT	19.6427379533105	0.182227205719409	1.1287051691787	6.82052056286069	3.11060411246167	111BQT	south_america	9.93112467532236	-0.927914207565073	-0.983553051406929	all
LOC105193135	QT	19.6427379533105	0.182227205719409	1.1287051691787	4.98462321846285	19.1729633598515	3QT	south_america	24.1575865783143	1.75309070240013	1.39173943699022	all
LOC105193135	QT	19.6427379533105	0.182227205719409	1.1287051691787	10.0119122100066	5.11597711830009	43QT	south_america	15.1278893283067	-0.848410099262484	-0.91311472041174	all
LOC105193135	QT	19.6427379533105	0.182227205719409	1.1287051691787	21.0216539454623	4.12832903455931	118QT	south_america	25.1499829800216	-2.10236209355636	-2.02407977004141	all
LOC105193135	QT	19.6427379533105	0.182227205719409	1.1287051691787	8.06153970156377	4.51167387348268	112BQT	south_america	12.5732135750464	-0.717265682128057	-0.796924575531076	all
LOC105193135	QT	19.6427379533105	0.182227205719409	1.1287051691787	21.0216539454623	15.5077166796622	114CQT	south_america	36.5293706251245	-0.415782244346267	-0.529819005348241	all
LOC105193135	W	11.2538122705931	0.127073279071061	1.3566622902154	11.8075992840382	2.2153880970946	28W	south_america	14.0229873811328	-1.9939352891992	-1.56340202242484	all
LOC105193135	W	11.2538122705931	0.127073279071061	1.3566622902154	9.30463000779732	4.92649648428897	43CW	south_america	14.2311264920863	-0.798041308901581	-0.6819048444442	all
LOC105193135	W	11.2538122705931	0.127073279071061	1.3566622902154	11.0846170896502	1.26050624165114	114W	south_america	12.3451233313013	-2.41845395462305	-1.8763160530466	all
LOC105193135	W	11.2538122705931	0.127073279071061	1.3566622902154	3.89289887878932	5.01297097053631	3BW	south_america	8.90586984932563	0.297388526499415	0.12553989939627	all
LOC105193135	W	11.2538122705931	0.127073279071061	1.3566622902154	6.82052056286069	3.3419806470242	104W	south_america	10.1625012098849	-0.848911346242403	-0.719401307423757	all
LOC105193135	W	11.2538122705931	0.127073279071061	1.3566622902154	5.83934831818398	1.8440047320581	112W	south_america	7.68335305024208	-1.26593500020237	-1.0267907417492	all
LOC105193135	whole_body_queen	14.2518969243183	0.0471818512520358	0.742792715921167	7.32400244933766	4.05777116411809	Queen6	north_america	11.3817736134558	-0.718775624997263	-1.03118603593117	all
LOC105193135	whole_body_queen	14.2518969243183	0.0471818512520358	0.742792715921167	10.3396575784454	5.42467407126264	Queen2	north_america	15.7643316497081	-0.819681903912565	-1.16703319322345	all
LOC105193135	whole_body_queen	14.2518969243183	0.0471818512520358	0.742792715921167	10.4915925995897	5.72834476155438	Queen4	north_america	16.219937361144	-0.772255215861936	-1.10318403714791	all
LOC105193135	whole_body_queen	14.2518969243183	0.0471818512520358	0.742792715921167	11.3599055373594	4.981819595151	Queen3	north_america	16.3417251325104	-1.047011411056	-1.47308022662969	all
LOC105193135	whole_body_queen	14.2518969243183	0.0471818512520358	0.742792715921167	8.81962767618131	3.91983452274725	Queen1	north_america	12.7394621989286	-0.997058532200187	-1.40583013412728	all
LOC105193135	whole_body_queen	14.2518969243183	0.0471818512520358	0.742792715921167	8.62871763105359	3.17594355401545	Queen5	north_america	11.804661185069	-1.20524145907456	-1.68610068930659	all
LOC105193135	whole_body_queen_taiwan	11.1723981387402	-0.0665560256069044	0.739710216204057	1.82359455272446	3.66233302330263	SBSb-virgin-queens-4	taiwan	5.48592757602709	0.723519114490083	1.06808737095911	all
LOC105193135	whole_body_queen_taiwan	11.1723981387402	-0.0665560256069044	0.739710216204057	2	2	SBSb-virgin-queens-3	taiwan	4	0	0.089975809646712	all
LOC105193135	whole_body_queen_taiwan	11.1723981387402	-0.0665560256069044	0.739710216204057	10.6668996414956	6.19196905995772	SBSb-virgin-queens-1	taiwan	16.8588687014533	-0.697962511151223	-0.853586271640918	all
LOC105193135	whole_body_queen_taiwan	11.1723981387402	-0.0665560256069044	0.739710216204057	12.3572171451914	7.31365937257017	SBSb-virgin-queens-2	taiwan	19.6708765177615	-0.684063922563374	-0.834797037311869	all
LOC105193225	QA	0.423009201507499	0.297259275323424	1.07755291546055	0	0	43QA	south_america	0	0	-0.27586513020233	sa
LOC105193225	QA	0.423009201507499	0.297259275323424	1.07755291546055	0.21627215993274	0	111BQA	south_america	0.21627215993274	-0.282466090501827	-0.538001760755736	sa
LOC105193225	QA	0.423009201507499	0.297259275323424	1.07755291546055	0.757835618095632	0	3QA	south_america	0.757835618095632	-0.813800164880386	-1.03109501562524	sa
LOC105193225	QA	0.423009201507499	0.297259275323424	1.07755291546055	0.215235283294178	0	112BQA	south_america	0.215235283294178	-0.281235662950139	-0.536859888710258	sa
LOC105193225	QA	0.423009201507499	0.297259275323424	1.07755291546055	0.629746243082259	0	118QA	south_america	0.629746243082259	-0.70464734951994	-0.929798073457162	sa
LOC105193225	QA	0.423009201507499	0.297259275323424	1.07755291546055	0.686982155080468	0	114CQA	south_america	0.686982155080468	-0.754444712858984	-0.976011454372901	sa
LOC105193225	QH	2.10580781299166	-0.156919105199937	1.54693179210804	1.29763295959644	0	118QH	south_america	1.29763295959644	-1.20014834991483	-0.674386065395461	sa
LOC105193225	QH	2.10580781299166	-0.156919105199937	1.54693179210804	3.57143435134488	0	3QH	south_america	3.57143435134488	-2.19264690202237	-1.31597773554599	sa
LOC105193225	QH	2.10580781299166	-0.156919105199937	1.54693179210804	2.50648548526815	0	114CQH	south_america	2.50648548526815	-1.81002575613728	-1.06863577267658	sa
LOC105193225	QH	2.10580781299166	-0.156919105199937	1.54693179210804	5.01297097053631	0	43QH	south_america	5.01297097053631	-2.58807799349749	-1.57160057133777	sa
LOC105193225	QH	2.10580781299166	-0.156919105199937	1.54693179210804	0	1.70513014071517	111BQH	south_america	1.70513014071517	1.43569800212899	1.02953285688093	sa
LOC105193225	QH	2.10580781299166	-0.156919105199937	1.54693179210804	0	1.45384843871833	112BQH	south_america	1.45384843871833	1.2950461440856	0.938609741355765	sa
LOC105193225	QT	0.649535709123721	0.182227205719409	1.1287051691787	0.830770536410475	0	3QT	south_america	0.830770536410475	-0.872450979159287	-0.93441424180429	sa
LOC105193225	QT	0.649535709123721	0.182227205719409	1.1287051691787	0	0	112BQT	south_america	0	0	-0.161448012018946	sa
LOC105193225	QT	0.649535709123721	0.182227205719409	1.1287051691787	3.50360899091039	0	114CQT	south_america	3.50360899091039	-2.17108157622763	-2.0849632359347	sa
LOC105193225	QT	0.649535709123721	0.182227205719409	1.1287051691787	0.583934831818398	0	118QT	south_america	0.583934831818398	-0.66351297951696	-0.749301242105386	sa
LOC105193225	QT	0.649535709123721	0.182227205719409	1.1287051691787	0.715136586429044	0	43QT	south_america	0.715136586429044	-0.778323471277037	-0.85102000347477	sa
LOC105193225	QT	0.649535709123721	0.182227205719409	1.1287051691787	0	0	111BQT	south_america	0	0	-0.161448012018946	sa
LOC105193225	W	0.712101156890665	0.127073279071061	1.3566622902154	0.487180040204335	0	104W	south_america	0.487180040204335	-0.572579312748018	-0.515716104785366	sa
LOC105193225	W	0.712101156890665	0.127073279071061	1.3566622902154	0.437318492001414	0	28W	south_america	0.437318492001414	-0.523379780597576	-0.479450976385114	sa
LOC105193225	W	0.712101156890665	0.127073279071061	1.3566622902154	3.89289887878932	0	3BW	south_america	3.89289887878932	-2.29068946699808	-1.78214045124323	sa
LOC105193225	W	0.712101156890665	0.127073279071061	1.3566622902154	2.77115427241255	0	114W	south_america	2.77115427241255	-1.91500617023349	-1.50522312297803	sa
LOC105193225	W	0.712101156890665	0.127073279071061	1.3566622902154	0.64881647979822	0	112W	south_america	0.64881647979822	-0.721430829691621	-0.625435021583717	sa
LOC105193225	W	0.712101156890665	0.127073279071061	1.3566622902154	0.77538583398311	0	43CW	south_america	0.77538583398311	-0.828132590974476	-0.704085222191795	sa
LOC105193225	whole_body_queen	0.966869888052027	0.0471818512520358	0.742792715921167	1.04628606419109	0	Queen6	north_america	1.04628606419109	-1.03300784329498	-1.45422763497005	no
LOC105193225	whole_body_queen	0.966869888052027	0.0471818512520358	0.742792715921167	0.953781145417242	0	Queen4	north_america	0.953781145417242	-0.966268871551673	-1.364378919019	no
LOC105193225	whole_body_queen	0.966869888052027	0.0471818512520358	0.742792715921167	0.979958630686813	0	Queen1	north_america	0.979958630686813	-0.985470286907669	-1.39022922011166	no
LOC105193225	whole_body_queen	0.966869888052027	0.0471818512520358	0.742792715921167	0.946658794779946	0	Queen3	north_america	0.946658794779946	-0.961000034434703	-1.35728563847917	no
LOC105193225	whole_body_queen	0.966869888052027	0.0471818512520358	0.742792715921167	0.86163813153712	0	Queen2	north_america	0.86163813153712	-0.896572666573614	-1.27054896688811	no
LOC105193225	whole_body_queen	0.966869888052027	0.0471818512520358	0.742792715921167	1.0785897038817	0	Queen5	north_america	1.0785897038817	-1.05560501043652	-1.48464953687779	no
LOC105193225	whole_body_queen_taiwan	0.97527758250736	-0.0665560256069044	0.739710216204057	0.911797276362229	0	SBSb-virgin-queens-4	taiwan	0.911797276362229	-0.934929550571406	-1.17393745002023	no
LOC105193225	whole_body_queen_taiwan	0.97527758250736	-0.0665560256069044	0.739710216204057	1.06668996414956	0	SBSb-virgin-queens-1	taiwan	1.06668996414956	-1.04732197815267	-1.3258786090298	no
LOC105193225	whole_body_queen_taiwan	0.97527758250736	-0.0665560256069044	0.739710216204057	1	0	SBSb-virgin-queens-3	taiwan	1	-1	-1.26190493783257	no
LOC105193225	whole_body_queen_taiwan	0.97527758250736	-0.0665560256069044	0.739710216204057	0.95055516501472	0	SBSb-virgin-queens-2	taiwan	0.95055516501472	-0.963884800806843	-1.21308149535196	no
LOC105194481	QA	2331.59130435578	0.297259275323424	1.07755291546055	1098.1304153669	1021.1302761398	112BQA	south_america	2119.2606915067	-0.104783489427868	-0.373107212632299	all
LOC105194481	QA	2331.59130435578	0.297259275323424	1.07755291546055	1103.63683213677	1440.28508506809	111BQA	south_america	2543.92191720487	0.383783590289139	0.0802970450214356	all
LOC105194481	QA	2331.59130435578	0.297259275323424	1.07755291546055	773.958132748096	773.958132748095	118QA	south_america	1547.91626549619	-1.12119927633522e-15	-0.275865130202331	all
LOC105194481	QA	2331.59130435578	0.297259275323424	1.07755291546055	3326.07791546316	2233.37155941791	43QA	south_america	5559.44947488106	-0.574386537239729	-0.80891230496148	all
LOC105194481	QA	2331.59130435578	0.297259275323424	1.07755291546055	1151.15230388727	1497.87572599625	3QA	south_america	2649.02802988351	0.379549331925654	0.0763675318599633	all
LOC105194481	QA	2331.59130435578	0.297259275323424	1.07755291546055	12.3656787914484	23.8095623422992	114CQA	south_america	36.1752411337477	0.892363176947496	0.552273482894086	all
LOC105194481	QH	2902.05517915227	-0.156919105199937	1.54693179210804	6551.11000062769	4604.33800542096	112BQH	south_america	11155.4480060486	-0.508652532232564	-0.227374877694712	all
LOC105194481	QH	2902.05517915227	-0.156919105199937	1.54693179210804	2604.23841919361	2047.01860171541	43QH	south_america	4651.25702090902	-0.347186588136723	-0.122996685379065	all
LOC105194481	QH	2902.05517915227	-0.156919105199937	1.54693179210804	907.1443252416	245.709012153912	3QH	south_america	1152.85333739551	-1.88011117600008	-1.11394185547891	all
LOC105194481	QH	2902.05517915227	-0.156919105199937	1.54693179210804	543.708210070908	378.572041242558	118QH	south_america	922.280251313466	-0.521109882918855	-0.235427818845605	all
LOC105194481	QH	2902.05517915227	-0.156919105199937	1.54693179210804	5804.26299899445	5679.78849872224	111BQH	south_america	11484.0514977167	-0.0312702367305851	0.0812245692475733	all
LOC105194481	QH	2902.05517915227	-0.156919105199937	1.54693179210804	55.1426806758994	36.3761096685903	114CQH	south_america	91.5187903444897	-0.586981538182628	-0.278009951813477	all
LOC105194481	QT	1403.19520628915	0.182227205719409	1.1287051691787	1006.91231369209	927.697184118416	43QT	south_america	1934.60949781051	-0.118089967107923	-0.266072293303891	all
LOC105194481	QT	1403.19520628915	0.182227205719409	1.1287051691787	1126.32665432896	1420.85483403666	111BQT	south_america	2547.18148836562	0.334868567203199	0.135235813259241	all
LOC105194481	QT	1403.19520628915	0.182227205719409	1.1287051691787	96.3492472500357	68.4123097155543	118QT	south_america	164.76155696559	-0.487978287525716	-0.593782602885393	all
LOC105194481	QT	1403.19520628915	0.182227205719409	1.1287051691787	17.5180449545519	12.6000198022255	114CQT	south_america	30.1180647567775	-0.44532304178225	-0.55599129395172	all
LOC105194481	QT	1403.19520628915	0.182227205719409	1.1287051691787	466.893041462687	404.887873305099	3QT	south_america	871.780914767786	-0.205097535657952	-0.343158472162573	all
LOC105194481	QT	1403.19520628915	0.182227205719409	1.1287051691787	1674.78487299987	1856.80444748665	112BQT	south_america	3531.58932048652	0.148761695049815	-0.0296494705468083	all
LOC105194481	W	4317.25681412043	0.127073279071061	1.3566622902154	2086.10493215496	2297.61169482914	104W	south_america	4383.7166269841	0.139259635871685	0.00898260155715648	all
LOC105194481	W	4317.25681412043	0.127073279071061	1.3566622902154	3237.59423419312	2209.1176690056	112W	south_america	5446.71190319872	-0.551244540880164	-0.499990177985657	all
LOC105194481	W	4317.25681412043	0.127073279071061	1.3566622902154	945.195331625411	769.765075670152	43CW	south_america	1714.96040729556	-0.29584684004596	-0.311735737159669	all
LOC105194481	W	4317.25681412043	0.127073279071061	1.3566622902154	2830.13748487984	1659.29339124752	3BW	south_america	4489.43087612735	-0.769943607246254	-0.66119394103222	all
LOC105194481	W	4317.25681412043	0.127073279071061	1.3566622902154	2109.62440541482	2141.17259584193	28W	south_america	4250.79700125675	0.0214048555708793	-0.0778885241097137	all
LOC105194481	W	4317.25681412043	0.127073279071061	1.3566622902154	138.557713620627	63.0253120825568	114W	south_america	201.583025703184	-1.12414758193977	-0.922278794092654	all
LOC105194481	whole_body_queen	141.662525784508	0.0471818512520358	0.742792715921167	92.0731736488163	64.9243386258895	Queen6	north_america	156.997512274706	-0.497554209134125	-0.733362146276047	all
LOC105194481	whole_body_queen	141.662525784508	0.0471818512520358	0.742792715921167	94.4243333963069	45.8267580924351	Queen4	north_america	140.251091488742	-1.02702404236281	-1.44617181966126	all
LOC105194481	whole_body_queen	141.662525784508	0.0471818512520358	0.742792715921167	99.2302527571162	55.0496882696012	Queen5	north_america	154.279941026717	-0.838539772290427	-1.19242098711758	all
LOC105194481	whole_body_queen	141.662525784508	0.0471818512520358	0.742792715921167	79.270708101415	45.205617260522	Queen2	north_america	124.476325361937	-0.796805372173941	-1.13623519097022	all
LOC105194481	whole_body_queen	141.662525784508	0.0471818512520358	0.742792715921167	85.2564008697527	57.8175592105219	Queen1	north_america	143.073960080275	-0.55238460246952	-0.807178693153996	all
LOC105194481	whole_body_queen	141.662525784508	0.0471818512520358	0.742792715921167	85.1992915301952	49.81819595151	Queen3	north_america	135.017487481705	-0.762330851334472	-1.08982315689862	all
LOC105194481	whole_body_queen_taiwan	8725.54278855505	-0.0665560256069044	0.739710216204057	5363.03224101305	3047.05333609705	SBSb-virgin-queens-2	taiwan	8410.0855771101	-0.815429760794527	-1.01238798489304	all
LOC105194481	whole_body_queen_taiwan	8725.54278855505	-0.0665560256069044	0.739710216204057	6430.00710389354	3289.9995605242	SBSb-virgin-queens-1	taiwan	9720.00666441775	-0.966518849317408	-1.21664241482132	all
LOC105194481	whole_body_queen_taiwan	8725.54278855505	-0.0665560256069044	0.739710216204057	5306	3735	SBSb-virgin-queens-3	taiwan	9041	-0.506402093701953	-0.594619431312156	all
LOC105194481	whole_body_queen_taiwan	8725.54278855505	-0.0665560256069044	0.739710216204057	4453.21789775313	3742.90434981529	SBSb-virgin-queens-4	taiwan	8196.12224756841	-0.250628558589579	-0.248844113479023	all
LOC105199327	QA	29.0667559829215	0.297259275323424	1.07755291546055	7.35325343771316	22.1692341793004	111BQA	south_america	29.5224876170135	1.47180024390566	1.09000769403537	all
LOC105199327	QA	29.0667559829215	0.297259275323424	1.07755291546055	12.3656787914484	9.52382493691969	114CQA	south_america	21.8895037283681	-0.344873953690495	-0.595918047086784	all
LOC105199327	QA	29.0667559829215	0.297259275323424	1.07755291546055	0	0	112BQA	south_america	0	0	-0.27586513020233	all
LOC105199327	QA	29.0667559829215	0.297259275323424	1.07755291546055	36.0250055413631	12.8724585557228	43QA	south_america	48.8974640970859	-1.41627645852361	-1.59021028968649	all
LOC105199327	QA	29.0667559829215	0.297259275323424	1.07755291546055	17.6328948063032	10.9781295425262	118QA	south_america	28.6110243488294	-0.637449188629389	-0.86743625351644	all
LOC105199327	QA	29.0667559829215	0.297259275323424	1.07755291546055	24.2507397790602	14.0363187175017	3QA	south_america	38.2870584965619	-0.747874254665514	-0.969913880788164	all
LOC105199327	QH	21.3320780353814	-0.156919105199937	1.54693179210804	5.45641645028855	18.7564315478669	111BQH	south_america	24.2128479981555	1.61351684444159	1.14448223164961	all
LOC105199327	QH	21.3320780353814	-0.156919105199937	1.54693179210804	20.0518838821452	11.6307875097466	43QH	south_america	31.6826713918919	-0.737004750658928	-0.374991094254063	all
LOC105199327	QH	21.3320780353814	-0.156919105199937	1.54693179210804	6.82052056286069	11.6307875097467	112BQH	south_america	18.4513080726073	0.691608044722261	0.548522665479576	all
LOC105199327	QH	21.3320780353814	-0.156919105199937	1.54693179210804	7.51945645580446	6.82052056286069	114CQH	south_america	14.3399770186651	-0.123496747094188	0.0216055796876496	all
LOC105199327	QH	21.3320780353814	-0.156919105199937	1.54693179210804	18.1668614343502	16.6666936396095	118QH	south_america	34.8335550739596	-0.117582054011551	0.0254290792839554	all
LOC105199327	QH	21.3320780353814	-0.156919105199937	1.54693179210804	7.14286870268977	3.69487236321673	3QH	south_america	10.8377410659065	-0.794451203501393	-0.412126831676707	all
LOC105199327	QT	9.13240952154845	0.182227205719409	1.1287051691787	5.17418801320466	12.4424164498467	111BQT	south_america	17.6166044630514	1.12247118375397	0.83302885794235	all
LOC105199327	QT	9.13240952154845	0.182227205719409	1.1287051691787	3.50360899091039	0.969232292478887	114CQT	south_america	4.47284128338928	-1.19344827329665	-1.21880852199611	all
LOC105199327	QT	9.13240952154845	0.182227205719409	1.1287051691787	4.29081951857427	3.41065141220006	43QT	south_america	7.70147093077432	-0.262499460940295	-0.394014910894144	all
LOC105199327	QT	9.13240952154845	0.182227205719409	1.1287051691787	3.22461588062551	4.01037677642905	112BQT	south_america	7.23499265705455	0.246098925425222	0.0565884886947838	all
LOC105199327	QT	9.13240952154845	0.182227205719409	1.1287051691787	8.30770536410475	2.25564274821782	3QT	south_america	10.5633481123226	-1.51548314599435	-1.504122066659	all
LOC105199327	QT	9.13240952154845	0.182227205719409	1.1287051691787	8.17508764545757	3.53856774390798	118QT	south_america	11.7136553893656	-1.0154848478131	-1.06113809543729	all
LOC105199327	W	37.3854984888896	0.127073279071061	1.3566622902154	31.1431910303146	10.0259419410726	3BW	south_america	41.1691329713872	-1.5436112505359	-1.23146677080683	all
LOC105199327	W	37.3854984888896	0.127073279071061	1.3566622902154	27.7115427241255	20.1680998664182	114W	south_america	47.8796425905436	-0.439739078230466	-0.417799154136977	all
LOC105199327	W	37.3854984888896	0.127073279071061	1.3566622902154	19.4644943939466	14.1373696124454	112W	south_america	33.601864006392	-0.435008490128889	-0.414312222911944	all
LOC105199327	W	37.3854984888896	0.127073279071061	1.3566622902154	25.5877325214426	23.4008583003726	43CW	south_america	48.9885908218153	-0.123828849755781	-0.184940740696055	all
LOC105199327	W	37.3854984888896	0.127073279071061	1.3566622902154	17.4927396800566	9.9692464369257	28W	south_america	27.4619861169823	-0.753494555165427	-0.64906929350611	all
LOC105199327	W	37.3854984888896	0.127073279071061	1.3566622902154	14.6154012061301	6.68396129404841	104W	south_america	21.2993625001785	-1.02304748002962	-0.847757594056869	all
LOC105199327	whole_body_queen	16.4093033227643	0.0471818512520358	0.742792715921167	15.1002558543438	2.11729570267697	Queen5	north_america	17.2175515570207	-2.36871669608237	-3.25245320201929	all
LOC105199327	whole_body_queen	16.4093033227643	0.0471818512520358	0.742792715921167	10.4628606419109	4.05777116411809	Queen6	north_america	14.520631806029	-1.18039345457549	-1.6526485512249	all
LOC105199327	whole_body_queen	16.4093033227643	0.0471818512520358	0.742792715921167	8.6163813153712	3.61644938084176	Queen2	north_america	12.232830696213	-1.0587104362721	-1.48883028040019	all
LOC105199327	whole_body_queen	16.4093033227643	0.0471818512520358	0.742792715921167	9.79958630686813	5.87975178412087	Queen1	north_america	15.679338090989	-0.650547629303795	-0.939332690803986	all
LOC105199327	whole_body_queen	16.4093033227643	0.0471818512520358	0.742792715921167	14.3067171812586	5.72834476155438	Queen4	north_america	20.035061942813	-1.18584136587831	-1.65998291407749	all
LOC105199327	whole_body_queen	16.4093033227643	0.0471818512520358	0.742792715921167	15.1465407164791	1.9927278380604	Queen3	north_america	17.1392685545395	-2.43169212104237	-3.33723516556062	all
LOC105199327	whole_body_queen_taiwan	37.9297260186387	-0.0665560256069044	0.739710216204057	26.4421210145046	28.3830809305954	SBSb-virgin-queens-4	taiwan	54.8252019451	0.0985936836235619	0.223262712360468	all
LOC105199327	whole_body_queen_taiwan	37.9297260186387	-0.0665560256069044	0.739710216204057	21	24	SBSb-virgin-queens-3	taiwan	45	0.184424571137428	0.339295836729523	all
LOC105199327	whole_body_queen_taiwan	37.9297260186387	-0.0665560256069044	0.739710216204057	18.1337293905425	11.3519432765892	SBSb-virgin-queens-1	taiwan	29.4856726671317	-0.631380066953378	-0.763574747209738	all
LOC105199327	whole_body_queen_taiwan	37.9297260186387	-0.0665560256069044	0.739710216204057	18.0605481352797	12.7989039019978	SBSb-virgin-queens-2	taiwan	30.8594520372775	-0.466035935316986	-0.540049198941819	all
LOC105199531	QA	178.305080921525	0.297259275323424	1.07755291546055	1.25949248616452	72.1419941366006	118QA	south_america	73.4014866227651	5.01662929620503	4.37971068814244	all
LOC105199531	QA	178.305080921525	0.297259275323424	1.07755291546055	3.02781023905836	234.207232055512	111BQA	south_america	237.23504229457	5.86779289431291	5.16961491084514	all
LOC105199531	QA	178.305080921525	0.297259275323424	1.07755291546055	0	205.952714260888	114CQA	south_america	205.952714260888	7.69315735994256	6.8636054698605	all
LOC105199531	QA	178.305080921525	0.297259275323424	1.07755291546055	1.50664698305925	212.526208132643	112BQA	south_america	214.032855115703	6.41251051400667	5.67512847948593	all
LOC105199531	QA	178.305080921525	0.297259275323424	1.07755291546055	0.692788568103137	93.6828928222048	43QA	south_america	94.3756813903079	5.80563009027038	5.11192604642778	all
LOC105199531	QA	178.305080921525	0.297259275323424	1.07755291546055	2.2735068542869	148.383940727875	3QA	south_america	150.657447582162	5.51204425196601	4.83946997110002	all
LOC105199531	QH	394.213497800322	-0.156919105199937	1.54693179210804	1.29763295959644	217.857495432038	118QH	south_america	219.155128391634	6.57369963410625	4.35094732272211	all
LOC105199531	QH	394.213497800322	-0.156919105199937	1.54693179210804	10.0259419410726	388.769672083059	114CQH	south_america	398.795614024132	5.14364802416434	3.42650345439024	all
LOC105199531	QH	394.213497800322	-0.156919105199937	1.54693179210804	5.45641645028855	520.064692918128	111BQH	south_america	525.521109368416	6.33458505356406	4.19637387497084	all
LOC105199531	QH	394.213497800322	-0.156919105199937	1.54693179210804	10.230780844291	1035.14008836745	112BQH	south_america	1045.37086921174	6.52761702374349	4.32115763800695	all
LOC105199531	QH	394.213497800322	-0.156919105199937	1.54693179210804	10.7143030540346	258.641065425171	3QH	south_america	269.355368479206	4.47017555303959	2.99114329529299	all
LOC105199531	QH	394.213497800322	-0.156919105199937	1.54693179210804	0	389.631381576513	43QH	south_america	389.631381576513	8.60966404331639	5.66707801419603	all
LOC105199531	QT	210.677794483426	0.182227205719409	1.1287051691787	5.64307779109464	764.478073006787	112BQT	south_america	770.121150797881	6.8483654337136	5.90600487179908	all
LOC105199531	QT	210.677794483426	0.182227205719409	1.1287051691787	1.1678696636368	111.461713635072	114CQT	south_america	112.629583298709	5.69701210321023	4.88593925861406	all
LOC105199531	QT	210.677794483426	0.182227205719409	1.1287051691787	0.715136586429044	111.698833749552	43QT	south_america	112.413970335981	6.0380053045274	5.1880493318454	all
LOC105199531	QT	210.677794483426	0.182227205719409	1.1287051691787	0.830770536410475	307.895235131733	3QT	south_america	308.726005668143	7.39852282743777	6.39342834494973	all
LOC105199531	QT	210.677794483426	0.182227205719409	1.1287051691787	4.46861692049493	466.936239548413	111BQT	south_america	471.404856468908	6.41899214892718	5.52559261135125	all
LOC105199531	QT	210.677794483426	0.182227205719409	1.1287051691787	2.33573932727359	97.3106129574695	118QT	south_america	99.646352284743	4.88126871039774	4.16321430342841	all
LOC105199531	W	742.987868751162	0.127073279071061	1.3566622902154	6.4881647979822	674.905731933265	112W	south_america	681.393896731247	6.49606605290954	4.69460441244172	all
LOC105199531	W	742.987868751162	0.127073279071061	1.3566622902154	0	804.581840771077	3BW	south_america	804.581840771077	9.65388735260702	7.02224432878089	all
LOC105199531	W	742.987868751162	0.127073279071061	1.3566622902154	8.74636984002829	291.877381792214	28W	south_america	300.623751632242	4.90928800275698	3.52498536900193	all
LOC105199531	W	742.987868751162	0.127073279071061	1.3566622902154	285.974683599945	1134.60242966472	104W	south_america	1420.57711326466	1.98446246526223	1.36908735474344	all
LOC105199531	W	742.987868751162	0.127073279071061	1.3566622902154	2.32615750194933	814.103544028753	43CW	south_america	816.429701530702	7.9369830433414	5.75670881441716	all
LOC105199531	W	742.987868751162	0.127073279071061	1.3566622902154	5.54230854482509	644.11868948373	114W	south_america	649.660998028555	6.62362100235775	4.7886255630023	all
LOC105199531	whole_body_queen	34.7057614247497	0.0471818512520358	0.742792715921167	5.67995276867968	30.8872814899362	Queen3	north_america	36.5672342586159	2.25507130056374	2.97241666751351	all
LOC105199531	whole_body_queen	34.7057614247497	0.0471818512520358	0.742792715921167	12.5554327702931	20.2888558205905	Queen6	north_america	32.8442885908836	0.651227240216584	0.813208552019047	all
LOC105199531	whole_body_queen	34.7057614247497	0.0471818512520358	0.742792715921167	5.39294851940849	19.0556613240927	Queen5	north_america	24.4486098435012	1.64945615760065	2.15709480182714	all
LOC105199531	whole_body_queen	34.7057614247497	0.0471818512520358	0.742792715921167	5.87975178412087	11.7595035682417	Queen1	north_america	17.6392553523626	0.891143779803867	1.13620113722467	all
LOC105199531	whole_body_queen	34.7057614247497	0.0471818512520358	0.742792715921167	15.5094863676682	27.1233703563132	Queen2	north_america	42.6328567239814	0.768474263226817	0.971054772770997	all
LOC105199531	whole_body_queen	34.7057614247497	0.0471818512520358	0.742792715921167	13.3529360358414	50.6003787270637	Queen4	north_america	63.9533147629051	1.84603576980628	2.42174415553256	all
LOC105199531	whole_body_queen_taiwan	1923.59148100301	-0.0665560256069044	0.739710216204057	482.340759195619	1541.84220281041	SBSb-virgin-queens-4	taiwan	2024.18296200603	1.67447795030686	2.35367031274512	all
LOC105199531	whole_body_queen_taiwan	1923.59148100301	-0.0665560256069044	0.739710216204057	346.002080065358	1215.89587068979	SBSb-virgin-queens-2	taiwan	1561.89795075515	1.81018950645808	2.5371361527164	all
LOC105199531	whole_body_queen_taiwan	1923.59148100301	-0.0665560256069044	0.739710216204057	498	1325	SBSb-virgin-queens-3	taiwan	1823	1.40996905477533	1.99608582933903	all
LOC105199531	whole_body_queen_taiwan	1923.59148100301	-0.0665560256069044	0.739710216204057	594.146310031305	1663.57568744197	SBSb-virgin-queens-1	taiwan	2257.72199747328	1.48383818310997	2.09594808176771	all
LOC105199756	QA	6.56578856505971	0.297259275323424	1.07755291546055	5.49585724064375	19.0476498738394	114CQA	south_america	24.5435071144831	1.62584129186147	1.23296220303966	all
LOC105199756	QA	6.56578856505971	0.297259275323424	1.07755291546055	0	0.357568293214522	111BQA	south_america	0.357568293214522	0.441024775417237	0.133418505978769	all
LOC105199756	QA	6.56578856505971	0.297259275323424	1.07755291546055	0.215235283294178	2.11468863813575	112BQA	south_america	2.32992392142993	1.3578522875643	0.984260723555817	all
LOC105199756	QA	6.56578856505971	0.297259275323424	1.07755291546055	13.2246711047274	9.40982532216529	118QA	south_america	22.6344964268927	-0.450449435406988	-0.693895121067758	all
LOC105199756	QA	6.56578856505971	0.297259275323424	1.07755291546055	4.84951997672196	5.00595610500331	43QA	south_america	9.85547608172527	0.0380756917643513	-0.240529796579222	all
LOC105199756	QA	6.56578856505971	0.297259275323424	1.07755291546055	2.2735068542869	1.00259419410726	3QA	south_america	3.27610104839416	-0.708966896844281	-0.933806737219623	all
LOC105199756	QH	169.741984791407	-0.156919105199937	1.54693179210804	1.36410411257214	1.70513014071517	111BQH	south_america	3.06923425328731	0.194404430495068	0.2271099071642	all
LOC105199756	QH	169.741984791407	-0.156919105199937	1.54693179210804	0	0	112BQH	south_america	0	0	0.10143892962863	all
LOC105199756	QH	169.741984791407	-0.156919105199937	1.54693179210804	50.0000809188284	31.4064150873422	3QH	south_america	81.4064960061706	-0.654220102688676	-0.321475710839879	all
LOC105199756	QH	169.741984791407	-0.156919105199937	1.54693179210804	95.2464484401898	162.831025136453	43QH	south_america	258.077473576643	0.767403379664292	0.59751987099873	all
LOC105199756	QH	169.741984791407	-0.156919105199937	1.54693179210804	160.906486989959	163.09550204475	118QH	south_america	324.001989034708	0.0193749040491068	0.113963660290933	all
LOC105199756	QH	169.741984791407	-0.156919105199937	1.54693179210804	180.466954939307	318.290959600166	114CQH	south_america	498.757914539472	0.815164847096674	0.628394837610733	all
LOC105199756	QT	5.71194983543832	0.182227205719409	1.1287051691787	15.733004901439	22.1692341793004	43QT	south_america	37.9022390807393	0.469513812274818	0.254527590021097	all
LOC105199756	QT	5.71194983543832	0.182227205719409	1.1287051691787	0	0	112BQT	south_america	0	0	-0.161448012018946	all
LOC105199756	QT	5.71194983543832	0.182227205719409	1.1287051691787	5.25541348636558	0.58976129065133	118QT	south_america	5.84517477701691	-1.97629509546089	-1.91238807097069	all
LOC105199756	QT	5.71194983543832	0.182227205719409	1.1287051691787	43.2111775545615	52.3385437938599	114CQT	south_america	95.5497213484214	0.27076727746883	0.0784439321863359	all
LOC105199756	QT	5.71194983543832	0.182227205719409	1.1287051691787	0.235190364236576	0	111BQT	south_america	0.235190364236576	-0.304733403247833	-0.431432957219092	all
LOC105199756	QT	5.71194983543832	0.182227205719409	1.1287051691787	3.3230821456419	2.25564274821782	3QT	south_america	5.57872489385972	-0.409117853177664	-0.523914548320324	all
LOC105199756	W	18.1053970994984	0.127073279071061	1.3566622902154	25.8205421308298	27.5713403379497	104W	south_america	53.3918824687794	0.091230318412895	-0.0264199579487648	all
LOC105199756	W	18.1053970994984	0.127073279071061	1.3566622902154	19.4644943939466	2.50648548526815	3BW	south_america	21.9709798792148	-2.54502536202477	-1.96961223170107	all
LOC105199756	W	18.1053970994984	0.127073279071061	1.3566622902154	0	0.55384702427365	28W	south_america	0.55384702427365	0.635844477886412	0.375016835423777	all
LOC105199756	W	18.1053970994984	0.127073279071061	1.3566622902154	1.94644943939466	12.2933648803873	112W	south_america	14.239814319782	2.17365691764411	1.508543174918	all
LOC105199756	W	18.1053970994984	0.127073279071061	1.3566622902154	62.0308667186488	93.6034332014905	43CW	south_america	155.634299920139	0.585834039634233	0.338153985610034	all
LOC105199756	W	18.1053970994984	0.127073279071061	1.3566622902154	0	0	114W	south_america	0	0	-0.093666109825228	all
LOC105199756	whole_body_queen	7.19254119629039	0.0471818512520358	0.742792715921167	0	7.41053495936939	Queen5	north_america	7.41053495936939	3.07219756726803	4.07248974199289	all
LOC105199756	whole_body_queen	7.19254119629039	0.0471818512520358	0.742792715921167	0	5.42467407126264	Queen2	north_america	5.42467407126264	2.68362326711584	3.54936358334404	all
LOC105199756	whole_body_queen	7.19254119629039	0.0471818512520358	0.742792715921167	0	3.81889650770292	Queen4	north_america	3.81889650770292	2.26870281759024	2.99076837820523	all
LOC105199756	whole_body_queen	7.19254119629039	0.0471818512520358	0.742792715921167	1.04628606419109	10.1444279102952	Queen6	north_america	11.1907139744863	2.44524281057102	3.22843898158729	all
LOC105199756	whole_body_queen	7.19254119629039	0.0471818512520358	0.742792715921167	0	6.9745474332114	Queen3	north_america	6.9745474332114	2.99540264622695	3.96910299708406	all
LOC105199756	whole_body_queen	7.19254119629039	0.0471818512520358	0.742792715921167	0.979958630686813	6.85971041480769	Queen1	north_america	7.8396690454945	1.98900587152822	2.61422060105699	all
LOC105199756	whole_body_queen_taiwan	1.52461998624528	-0.0665560256069044	0.739710216204057	0.95055516501472	0	SBSb-virgin-queens-2	taiwan	0.95055516501472	-0.963884800806843	-1.21308149535196	all
LOC105199756	whole_body_queen_taiwan	1.52461998624528	-0.0665560256069044	0.739710216204057	1.06668996414956	1.03199484332629	SBSb-virgin-queens-1	taiwan	2.09868480747585	-0.0244252372222371	0.0569558016933555	all
LOC105199756	whole_body_queen_taiwan	1.52461998624528	-0.0665560256069044	0.739710216204057	0	0.915583255825657	SBSb-virgin-queens-4	taiwan	0.915583255825657	0.937783730098295	1.3577475796659	all
LOC105199756	whole_body_queen_taiwan	1.52461998624528	-0.0665560256069044	0.739710216204057	0	6	SBSb-virgin-queens-3	taiwan	6	2.8073549220576	3.88518488011758	all
LOC105199789	QA	10.2388716697753	0.297259275323424	1.07755291546055	6.92788568103137	1.43027317285809	43QA	south_america	8.35815885388946	-1.70581767132409	-1.85891283658343	sa_taiwan
LOC105199789	QA	10.2388716697753	0.297259275323424	1.07755291546055	26.7923040481383	2.38095623422992	114CQA	south_america	29.1732602823682	-3.03918219626849	-3.09631334454319	sa_taiwan
LOC105199789	QA	10.2388716697753	0.297259275323424	1.07755291546055	3.46035455892384	1.07270487964357	111BQA	south_america	4.53305943856741	-1.10564368212064	-1.30193416705152	sa_taiwan
LOC105199789	QA	10.2388716697753	0.297259275323424	1.07755291546055	11.3354323754807	0.784152110180441	118QA	south_america	12.1195844856611	-2.78949776072439	-2.86459902967135	sa_taiwan
LOC105199789	QA	10.2388716697753	0.297259275323424	1.07755291546055	12.8832055076257	0	3QA	south_america	12.8832055076257	-3.79526880660961	-3.79798339665192	sa_taiwan
LOC105199789	QA	10.2388716697753	0.297259275323424	1.07755291546055	3.44376453270685	1.05734431906788	112BQA	south_america	4.50110885177473	-1.11099910801088	-1.30690415582275	sa_taiwan
LOC105199789	QH	11.6035552201277	-0.156919105199937	1.54693179210804	12.9763295959644	0	118QH	south_america	12.9763295959644	-3.80491363092614	-2.35821291173737	sa_taiwan
LOC105199789	QH	11.6035552201277	-0.156919105199937	1.54693179210804	7.14286870268977	0	3QH	south_america	7.14286870268977	-3.02553714019678	-1.85439206151922	sa_taiwan
LOC105199789	QH	11.6035552201277	-0.156919105199937	1.54693179210804	10.230780844291	0	112BQH	south_america	10.230780844291	-3.48938633260126	-2.15424315693978	sa_taiwan
LOC105199789	QH	11.6035552201277	-0.156919105199937	1.54693179210804	15.0389129116089	0	43QH	south_america	15.0389129116089	-4.00350445674384	-2.48659014648738	sa_taiwan
LOC105199789	QH	11.6035552201277	-0.156919105199937	1.54693179210804	5.45641645028855	0	111BQH	south_america	5.45641645028855	-2.6907336380006	-1.63796137989238	sa_taiwan
LOC105199789	QH	11.6035552201277	-0.156919105199937	1.54693179210804	35.0907967937541	0	114CQH	south_america	35.0907967937541	-5.17355908954141	-3.24296133154338	sa_taiwan
LOC105199789	QT	7.41062596837069	0.182227205719409	1.1287051691787	6.6461642912838	0	3QT	south_america	6.6461642912838	-2.9347361993452	-2.7615390539344	sa_taiwan
LOC105199789	QT	7.41062596837069	0.182227205719409	1.1287051691787	11.4421853828647	0.852662853050014	43QT	south_america	12.2948482359147	-2.74756763780618	-2.59571314416629	sa_taiwan
LOC105199789	QT	7.41062596837069	0.182227205719409	1.1287051691787	2.41846191046913	0	112BQT	south_america	2.41846191046913	-1.77334735047182	-1.7325822629254	sa_taiwan
LOC105199789	QT	7.41062596837069	0.182227205719409	1.1287051691787	14.0144359636416	0	114CQT	south_america	14.0144359636416	-3.90827837412865	-3.62406914714895	sa_taiwan
LOC105199789	QT	7.41062596837069	0.182227205719409	1.1287051691787	8.17508764545757	0	118QT	south_america	8.17508764545757	-3.19772193943411	-2.99453678201274	sa_taiwan
LOC105199789	QT	7.41062596837069	0.182227205719409	1.1287051691787	2.35190364236576	0	111BQT	south_america	2.35190364236576	-1.74498067628094	-1.70745021341816	sa_taiwan
LOC105199789	W	6.81597912001533	0.127073279071061	1.3566622902154	9.30463000779732	0	43CW	south_america	9.30463000779732	-3.36522080010429	-2.57418084394524	sa_taiwan
LOC105199789	W	6.81597912001533	0.127073279071061	1.3566622902154	7.78579775757864	0	112W	south_america	7.78579775757864	-3.13517329006389	-2.40461210771695	sa_taiwan
LOC105199789	W	6.81597912001533	0.127073279071061	1.3566622902154	5.68514039601839	0	28W	south_america	5.68514039601839	-2.74095785897421	-2.11403468551479	sa_taiwan
LOC105199789	W	6.81597912001533	0.127073279071061	1.3566622902154	5.54230854482509	0	114W	south_america	5.54230854482509	-2.70979980063015	-2.0910679836548	sa_taiwan
LOC105199789	W	6.81597912001533	0.127073279071061	1.3566622902154	15.5715955151573	0	3BW	south_america	15.5715955151573	-4.05064060698147	-3.07940591861608	sa_taiwan
LOC105199789	W	6.81597912001533	0.127073279071061	1.3566622902154	5.84616048245202	0	104W	south_america	5.84616048245202	-2.77529511129663	-2.13934478115912	sa_taiwan
LOC105199789	whole_body_queen	5.76167497968278	0.0471818512520358	0.742792715921167	4.31435881552679	1.05864785133848	Queen5	north_america	5.37300666686528	-1.36819857296452	-1.90548506182009	no
LOC105199789	whole_body_queen	5.76167497968278	0.0471818512520358	0.742792715921167	5.16982878922272	1.80822469042088	Queen2	north_america	6.9780534796436	-1.13557208307124	-1.59230685623579	no
LOC105199789	whole_body_queen	5.76167497968278	0.0471818512520358	0.742792715921167	5.67995276867968	0.996363919030199	Queen3	north_america	6.67631668770988	-1.74246316714045	-2.40934648392866	no
LOC105199789	whole_body_queen	5.76167497968278	0.0471818512520358	0.742792715921167	3.91983452274725	0	Queen1	north_america	3.91983452274725	-2.29860979173794	-3.15807033740344	no
LOC105199789	whole_body_queen	5.76167497968278	0.0471818512520358	0.742792715921167	2.09257212838219	4.05777116411809	Queen6	north_america	6.15034329250028	0.709694520868154	0.891921333389101	no
LOC105199789	whole_body_queen	5.76167497968278	0.0471818512520358	0.742792715921167	3.81512458166897	0.95472412692573	Queen4	north_america	4.7698487085947	-1.30060811314715	-1.81449001250334	no
LOC105199789	whole_body_queen_taiwan	28.4786831402762	-0.0665560256069044	0.739710216204057	18	3	SBSb-virgin-queens-3	taiwan	21	-2.24792751344359	-2.94895411750664	sa_taiwan
LOC105199789	whole_body_queen_taiwan	28.4786831402762	-0.0665560256069044	0.739710216204057	40.5342186376833	3.09598452997886	SBSb-virgin-queens-1	taiwan	43.6302031676621	-3.34201824240463	-4.42803430998464	sa_taiwan
LOC105199789	whole_body_queen_taiwan	28.4786831402762	-0.0665560256069044	0.739710216204057	32.3188756105005	1.82841484314254	SBSb-virgin-queens-2	taiwan	34.147290453643	-3.5582740752489	-4.72038640693691	sa_taiwan
LOC105199789	whole_body_queen_taiwan	28.4786831402762	-0.0665560256069044	0.739710216204057	19.1477428036068	3.66233302330263	SBSb-virgin-queens-4	taiwan	22.8100758269094	-2.11149425671965	-2.76451262442566	sa_taiwan
LOC105199797	QA	21.7387984103986	0.297259275323424	1.07755291546055	14.398876743817	6.01556516464357	3QA	south_america	20.4144419084606	-1.13419388352031	-1.32842957251146	sa
LOC105199797	QA	21.7387984103986	0.297259275323424	1.07755291546055	16.6269256344753	6.4362292778614	43QA	south_america	23.0631549123367	-1.24513771377103	-1.43138862784778	sa
LOC105199797	QA	21.7387984103986	0.297259275323424	1.07755291546055	8.86715855724234	7.50893415750496	111BQA	south_america	16.3760927147473	-0.213656263045634	-0.474144268034106	sa
LOC105199797	QA	21.7387984103986	0.297259275323424	1.07755291546055	10.5465288814147	7.13707415370817	112BQA	south_america	17.6836030351229	-0.504877170452505	-0.744405619684205	sa
LOC105199797	QA	21.7387984103986	0.297259275323424	1.07755291546055	12.3656787914484	27.3809966936441	114CQA	south_america	39.7466754850925	1.08639214697383	0.732337930071054	sa
LOC105199797	QA	21.7387984103986	0.297259275323424	1.07755291546055	15.1139098339742	10.1939774323457	118QA	south_america	25.3078872663199	-0.525583843706122	-0.763622006143302	sa
LOC105199797	QH	16.6680263668871	-0.156919105199937	1.54693179210804	12.5324274263408	4.54701370857379	114CQH	south_america	17.0794411349146	-1.28663745500498	-0.73029616145231	sa
LOC105199797	QH	16.6680263668871	-0.156919105199937	1.54693179210804	32.440823989911	11.9047811711496	118QH	south_america	44.3456051610606	-1.37370471862536	-0.786580002837286	sa
LOC105199797	QH	16.6680263668871	-0.156919105199937	1.54693179210804	10.7143030540346	5.54230854482509	3QH	south_america	16.2566115988597	-0.84039941743837	-0.441829637043686	sa
LOC105199797	QH	16.6680263668871	-0.156919105199937	1.54693179210804	17.0513014071517	10.1769390710283	112BQH	south_america	27.22824047818	-0.691577707644286	-0.345625195093934	sa
LOC105199797	QH	16.6680263668871	-0.156919105199937	1.54693179210804	2.50648548526815	5.81539375487332	43QH	south_america	8.32187924014148	0.958771254054304	0.721227894433449	sa
LOC105199797	QH	16.6680263668871	-0.156919105199937	1.54693179210804	9.54872878800497	3.41026028143035	111BQH	south_america	12.9589890694353	-1.25813344502106	-0.711870003214862	sa
LOC105199797	QT	10.7185539368425	0.182227205719409	1.1287051691787	14.9538696553886	3.38346412232673	3QT	south_america	18.3373337777153	-1.86376305113326	-1.81268794785572	sa
LOC105199797	QT	10.7185539368425	0.182227205719409	1.1287051691787	7.86650245071949	1.70532570610003	43QT	south_america	9.57182815681952	-1.71256282314275	-1.67872893701807	sa
LOC105199797	QT	10.7185539368425	0.182227205719409	1.1287051691787	12.8465663000048	2.94880645325665	118QT	south_america	15.7953727532614	-1.81003969573285	-1.76509061520639	sa
LOC105199797	QT	10.7185539368425	0.182227205719409	1.1287051691787	6.11494947015096	3.45622679162408	111BQT	south_america	9.57117626177504	-0.67503085296578	-0.759505743478585	sa
LOC105199797	QT	10.7185539368425	0.182227205719409	1.1287051691787	3.50360899091039	5.81539375487332	114CQT	south_america	9.31900274578371	0.597715433963949	0.36811050360199	sa
LOC105199797	QT	10.7185539368425	0.182227205719409	1.1287051691787	6.8523087463292	5.01297097053631	112BQT	south_america	11.8652797168655	-0.385038906005651	-0.50258130042749	sa
LOC105199797	W	15.6171238678914	0.127073279071061	1.3566622902154	5.42770083788177	3.69487236321673	43CW	south_america	9.1225732010985	-0.453216847055	-0.427733659519591	sa
LOC105199797	W	15.6171238678914	0.127073279071061	1.3566622902154	15.5715955151573	0	3BW	south_america	15.5715955151573	-4.05064060698147	-3.07940591861608	sa
LOC105199797	W	15.6171238678914	0.127073279071061	1.3566622902154	13.6251460757626	4.30267770813557	112W	south_america	17.9278237838982	-1.46365806380586	-1.17253302782107	sa
LOC105199797	W	15.6171238678914	0.127073279071061	1.3566622902154	7.30770060306503	8.35495161756051	104W	south_america	15.6626522206255	0.171280967500616	0.0325856248444386	sa
LOC105199797	W	15.6171238678914	0.127073279071061	1.3566622902154	12.0083351804544	6.30253120825568	114W	south_america	18.31086638871	-0.832967812624732	-0.707649279131484	sa
LOC105199797	W	15.6171238678914	0.127073279071061	1.3566622902154	9.1836883320297	3.3230821456419	28W	south_america	12.5067704776716	-1.23612801670993	-1.00481992137082	sa
LOC105199797	whole_body_queen	26.2699480159599	0.0471818512520358	0.742792715921167	6.89310505229696	14.4657975233671	Queen2	north_america	21.358902575664	0.970416374833665	1.24292350179645	no
LOC105199797	whole_body_queen	26.2699480159599	0.0471818512520358	0.742792715921167	13.2532231269192	15.9418227044832	Queen3	north_america	29.1950458314024	0.249300899528007	0.27210693366226	no
LOC105199797	whole_body_queen	26.2699480159599	0.0471818512520358	0.742792715921167	15.1002558543438	10.5864785133848	Queen5	north_america	25.6867343677286	-0.474641461213262	-0.702515387241196	no
LOC105199797	whole_body_queen	26.2699480159599	0.0471818512520358	0.742792715921167	14.6993794603022	14.6993794603022	Queen1	north_america	29.3987589206044	0	-0.0635195394902651	no
LOC105199797	whole_body_queen	26.2699480159599	0.0471818512520358	0.742792715921167	17.1680606175103	6.68306888848011	Queen4	north_america	23.8511295059905	-1.24164983027738	-1.7351162092793	no
LOC105199797	whole_body_queen	26.2699480159599	0.0471818512520358	0.742792715921167	15.6942909628664	11.1588707013248	Queen6	north_america	26.8531616641912	-0.457345581266294	-0.679230452458928	no
LOC105199797	whole_body_queen_taiwan	58.1423138324416	-0.0665560256069044	0.739710216204057	34.6482965017647	25.6363311631184	SBSb-virgin-queens-4	taiwan	60.2846276648831	-0.420437755276727	-0.4784058972253	no
LOC105199797	whole_body_queen_taiwan	58.1423138324416	-0.0665560256069044	0.739710216204057	41.8244272606477	24.6836003824243	SBSb-virgin-queens-2	taiwan	66.508027643072	-0.737586494915633	-0.907153172430455	no
LOC105199797	whole_body_queen_taiwan	58.1423138324416	-0.0665560256069044	0.739710216204057	33.0673888886363	15.4799226498943	SBSb-virgin-queens-1	taiwan	48.5473115385306	-1.04768190450938	-1.32636518654194	no
LOC105199797	whole_body_queen_taiwan	58.1423138324416	-0.0665560256069044	0.739710216204057	34	22	SBSb-virgin-queens-3	taiwan	56	-0.605721060887954	-0.728886830910436	no
LOC105202818	QA	185.162295518294	0.297259275323424	1.07755291546055	69.6396354983423	276.042722361611	111BQA	south_america	345.682357859953	1.97155866557846	1.55379783789035	sa
LOC105202818	QA	185.162295518294	0.297259275323424	1.07755291546055	213.378878975766	241.716166213017	43QA	south_america	455.095045188783	0.179107427328501	-0.109648302463573	sa
LOC105202818	QA	185.162295518294	0.297259275323424	1.07755291546055	17.8615360320922	120.238289828611	114CQA	south_america	138.099825860703	2.68432633184935	2.21526666790716	sa
LOC105202818	QA	185.162295518294	0.297259275323424	1.07755291546055	18.9458904523908	146.37875233966	3QA	south_america	165.324642792051	2.88536510864946	2.40183641674792	sa
LOC105202818	QA	185.162295518294	0.297259275323424	1.07755291546055	46.6012219880871	158.398726256449	118QA	south_america	204.999948244536	1.74356958583957	1.34221743523193	sa
LOC105202818	QA	185.162295518294	0.297259275323424	1.07755291546055	0	0	112BQA	south_america	0	0	-0.27586513020233	sa
LOC105202818	QH	130.102854875099	-0.156919105199937	1.54693179210804	117.804817807603	168.646418891326	43QH	south_america	286.45123669893	0.513937634245178	0.43366924312217	sa
LOC105202818	QH	130.102854875099	-0.156919105199937	1.54693179210804	40.9231233771641	206.446478298003	112BQH	south_america	247.369601675167	2.30692105522861	1.59272708273131	sa
LOC105202818	QH	130.102854875099	-0.156919105199937	1.54693179210804	10.0259419410726	59.1111782114593	114CQH	south_america	69.1371201525319	2.44673138812481	1.68310620197203	sa
LOC105202818	QH	130.102854875099	-0.156919105199937	1.54693179210804	25.0000404594142	53.5756492666426	3QH	south_america	78.5756897260568	1.06974352026124	0.792964907515137	sa
LOC105202818	QH	130.102854875099	-0.156919105199937	1.54693179210804	40.9231233771641	115.948849568632	111BQH	south_america	156.871972945796	1.48005955953287	1.05820998255008	sa
LOC105202818	QH	130.102854875099	-0.156919105199937	1.54693179210804	25.9526591919288	77.3810776124725	118QH	south_america	103.333736804401	1.5400777892179	1.0970082217428	sa
LOC105202818	QT	94.7269358691965	0.182227205719409	1.1287051691787	46.4838781178879	47.7491197708008	43QT	south_america	94.2329978886887	0.037938401324586	-0.127835690253651	sa
LOC105202818	QT	94.7269358691965	0.182227205719409	1.1287051691787	3.50360899091039	17.44618126462	114CQT	south_america	20.9497902555304	2.03416869858651	1.64076637853503	sa
LOC105202818	QT	94.7269358691965	0.182227205719409	1.1287051691787	30.2307738808641	210.544780762525	112BQT	south_america	240.775554643389	2.75992286785069	2.28376349512684	sa
LOC105202818	QT	94.7269358691965	0.182227205719409	1.1287051691787	9.9692464369257	76.6918534394059	3QT	south_america	86.6610998763316	2.82429891023552	2.34079879906868	sa
LOC105202818	QT	94.7269358691965	0.182227205719409	1.1287051691787	32.1164157500119	63.1044580996923	118QT	south_america	95.2208738497042	0.952878155775368	0.68277436047956	sa
LOC105202818	QT	94.7269358691965	0.182227205719409	1.1287051691787	29.8691762580451	191.129341576812	111BQT	south_america	220.998517834857	2.63783897073384	2.17560070784584	sa
LOC105202818	W	329.051971983637	0.127073279071061	1.3566622902154	55.7982172626469	188.088482669926	112W	south_america	243.886699932573	1.73514393839918	1.18531389198767	sa
LOC105202818	W	329.051971983637	0.127073279071061	1.3566622902154	181.440285152048	232.776958882654	43CW	south_america	414.217244034702	0.357708414255477	0.170001876552342	sa
LOC105202818	W	329.051971983637	0.127073279071061	1.3566622902154	46.7147865454718	175.453983968771	3BW	south_america	222.168770514243	1.88678367982222	1.29708801773489	sa
LOC105202818	W	329.051971983637	0.127073279071061	1.3566622902154	312.682721781011	361.662106850693	28W	south_america	674.344828631705	0.209319946519848	0.0606242747675468	sa
LOC105202818	W	329.051971983637	0.127073279071061	1.3566622902154	29.5589789057338	181.512898797763	114W	south_america	211.071877703497	2.57833018444297	1.80682910039663	sa
LOC105202818	W	329.051971983637	0.127073279071061	1.3566622902154	147.615552181914	329.185093731884	104W	south_america	476.800645913798	1.15168989339877	0.755248098010476	sa
LOC105202818	whole_body_queen	25.1236515497926	0.0471818512520358	0.742792715921167	10.785897038817	12.7037742160618	Queen5	north_america	23.4896712548788	0.217511718804577	0.229310094056736	no
LOC105202818	whole_body_queen	25.1236515497926	0.0471818512520358	0.742792715921167	18.0944007622795	14.4657975233671	Queen2	north_america	32.5601982856466	-0.304068414044122	-0.472877907614587	no
LOC105202818	whole_body_queen	25.1236515497926	0.0471818512520358	0.742792715921167	19.0756229083448	22.9133790462175	Queen4	north_america	41.9890019545624	0.252373249920326	0.276243148687617	no
LOC105202818	whole_body_queen	25.1236515497926	0.0471818512520358	0.742792715921167	2.83997638433984	2.9890917570906	Queen3	north_america	5.82906814143044	0.0549628702064705	0.0104753571052256	no
LOC105202818	whole_body_queen	25.1236515497926	0.0471818512520358	0.742792715921167	6.85971041480769	8.81962767618131	Queen1	north_america	15.679338090989	0.32119216550224	0.368892031891284	no
LOC105202818	whole_body_queen	25.1236515497926	0.0471818512520358	0.742792715921167	12.5554327702931	14.2021990744133	Queen6	north_america	26.7576318447065	0.16540885850027	0.159165544726184	no
LOC105202818	whole_body_queen_taiwan	16.600426903874	-0.0665560256069044	0.739710216204057	9	12	SBSb-virgin-queens-3	taiwan	21	0.37851162325373	0.601678385820559	no
LOC105202818	whole_body_queen_taiwan	16.600426903874	-0.0665560256069044	0.739710216204057	7.29437821089783	11.9025823257335	SBSb-virgin-queens-4	taiwan	19.1969605366314	0.637454097324456	0.951737731221427	no
LOC105202818	whole_body_queen_taiwan	16.600426903874	-0.0665560256069044	0.739710216204057	4.26675985659824	4.12797937330515	SBSb-virgin-queens-1	taiwan	8.39473922990338	-0.0385252209114001	0.0378943052042041	no
LOC105202818	whole_body_queen_taiwan	16.600426903874	-0.0665560256069044	0.739710216204057	7.60444132011776	6.3994519509989	SBSb-virgin-queens-2	taiwan	14.0038932711167	-0.217663102390947	-0.20427874791222	no
LOC105203024	QA	0.689885361591803	0.297259275323424	1.07755291546055	0.692788568103137	0	43QA	south_america	0.692788568103137	-0.75940178965543	-0.980611763764044	sa
LOC105203024	QA	0.689885361591803	0.297259275323424	1.07755291546055	3.03134247238253	2.00518838821452	3QA	south_america	5.03653086059705	-0.423804915919109	-0.669168243059646	sa
LOC105203024	QA	0.689885361591803	0.297259275323424	1.07755291546055	0.21627215993274	0	111BQA	south_america	0.21627215993274	-0.282466090501827	-0.538001760755736	sa
LOC105203024	QA	0.689885361591803	0.297259275323424	1.07755291546055	0	0	112BQA	south_america	0	0	-0.27586513020233	sa
LOC105203024	QA	0.689885361591803	0.297259275323424	1.07755291546055	0	0.784152110180441	118QA	south_america	0.784152110180441	0.83523861932102	0.499260255602077	sa
LOC105203024	QA	0.689885361591803	0.297259275323424	1.07755291546055	0.686982155080468	0	114CQA	south_america	0.686982155080468	-0.754444712858984	-0.976011454372901	sa
LOC105203024	QH	1.9020592224323	-0.156919105199937	1.54693179210804	0	0	43QH	south_america	0	0	0.10143892962863	sa
LOC105203024	QH	1.9020592224323	-0.156919105199937	1.54693179210804	1.70513014071517	1.45384843871833	112BQH	south_america	3.1589785794335	-0.140651858043397	0.0105158141034599	sa
LOC105203024	QH	1.9020592224323	-0.156919105199937	1.54693179210804	2.50648548526815	0	114CQH	south_america	2.50648548526815	-1.81002575613728	-1.06863577267658	sa
LOC105203024	QH	1.9020592224323	-0.156919105199937	1.54693179210804	1.29763295959644	0	118QH	south_america	1.29763295959644	-1.20014834991483	-0.674386065395461	sa
LOC105203024	QH	1.9020592224323	-0.156919105199937	1.54693179210804	0	0	111BQH	south_america	0	0	0.10143892962863	sa
LOC105203024	QH	1.9020592224323	-0.156919105199937	1.54693179210804	3.57143435134488	0	3QH	south_america	3.57143435134488	-2.19264690202237	-1.31597773554599	sa
LOC105203024	QT	1.77248514125408	0.182227205719409	1.1287051691787	1.20923095523457	0	112BQT	south_america	1.20923095523457	-1.14354424737338	-1.17459500434244	sa
LOC105203024	QT	1.77248514125408	0.182227205719409	1.1287051691787	2.33573932727359	0	114CQT	south_america	2.33573932727359	-1.73800655318803	-1.70127134290055	sa
LOC105203024	QT	1.77248514125408	0.182227205719409	1.1287051691787	1.1678696636368	0	118QT	south_america	1.1678696636368	-1.1162780217853	-1.15043792033802	sa
LOC105203024	QT	1.77248514125408	0.182227205719409	1.1287051691787	0.235190364236576	0	111BQT	south_america	0.235190364236576	-0.304733403247833	-0.431432957219092	sa
LOC105203024	QT	1.77248514125408	0.182227205719409	1.1287051691787	3.57568293214522	1.70532570610003	43QT	south_america	5.28100863824525	-0.758184788386645	-0.833177715302168	sa
LOC105203024	QT	1.77248514125408	0.182227205719409	1.1287051691787	1.66154107282095	1.12782137410891	3QT	south_america	2.78936244692986	-0.322884785191909	-0.447514554468518	sa
LOC105203024	W	0.899177537403505	0.127073279071061	1.3566622902154	0	0.614668244019367	112W	south_america	0.614668244019367	0.691237773665631	0.415847406287823	sa
LOC105203024	W	0.899177537403505	0.127073279071061	1.3566622902154	0.923718090804182	0	114W	south_america	0.923718090804182	-0.943897396406448	-0.789415820872763	sa
LOC105203024	W	0.899177537403505	0.127073279071061	1.3566622902154	1.55077166796622	0	43CW	south_america	1.55077166796622	-1.35093376203875	-1.08944359386237	sa
LOC105203024	W	0.899177537403505	0.127073279071061	1.3566622902154	0.874636984002829	0	28W	south_america	0.874636984002829	-0.90661125049711	-0.761932086579965	sa
LOC105203024	W	0.899177537403505	0.127073279071061	1.3566622902154	0	0	3BW	south_america	0	0	-0.093666109825228	sa
LOC105203024	W	0.899177537403505	0.127073279071061	1.3566622902154	0.487180040204335	0.835495161756051	104W	south_america	1.32267520196039	0.303589998845666	0.130111023979726	sa
LOC105203024	whole_body_queen	1.92576399307656	0.0471818512520358	0.742792715921167	1.04628606419109	1.01444279102952	Queen6	north_america	2.06072885522062	-0.0226270089030178	-0.0939816164843254	no
LOC105203024	whole_body_queen	1.92576399307656	0.0471818512520358	0.742792715921167	0	0.904112345210441	Queen2	north_america	0.904112345210441	0.929118602120862	1.18732552428856	no
LOC105203024	whole_body_queen	1.92576399307656	0.0471818512520358	0.742792715921167	0.979958630686813	0.979958630686813	Queen1	north_america	1.95991726137363	0	-0.0635195394902651	no
LOC105203024	whole_body_queen	1.92576399307656	0.0471818512520358	0.742792715921167	1.0785897038817	0	Queen5	north_america	1.0785897038817	-1.05560501043652	-1.48464953687779	no
LOC105203024	whole_body_queen	1.92576399307656	0.0471818512520358	0.742792715921167	0.953781145417242	0.95472412692573	Queen4	north_america	1.90850527234297	0.00069614068680925	-0.0625823457457815	no
LOC105203024	whole_body_queen	1.92576399307656	0.0471818512520358	0.742792715921167	0.946658794779946	0.996363919030199	Queen3	north_america	1.94302271381015	0.0363747004306876	-0.0145493494883641	no
LOC105203024	whole_body_queen_taiwan	1.03334498207478	-0.0665560256069044	0.739710216204057	1	0	SBSb-virgin-queens-3	taiwan	1	-1	-1.26190493783257	no
LOC105203024	whole_body_queen_taiwan	1.03334498207478	-0.0665560256069044	0.739710216204057	0.95055516501472	0	SBSb-virgin-queens-2	taiwan	0.95055516501472	-0.963884800806843	-1.21308149535196	no
LOC105203024	whole_body_queen_taiwan	1.03334498207478	-0.0665560256069044	0.739710216204057	0.911797276362229	0.915583255825657	SBSb-virgin-queens-4	taiwan	1.82738053218789	0.002854179526889	0.0938343199989627	no
LOC105203024	whole_body_queen_taiwan	1.03334498207478	-0.0665560256069044	0.739710216204057	1.06668996414956	0	SBSb-virgin-queens-1	taiwan	1.06668996414956	-1.04732197815267	-1.3258786090298	no
LOC105203040	QA	21.8470896664986	0.297259275323424	1.07755291546055	80.3769121444148	38.0952997476788	114CQA	south_america	118.472211892094	-1.05762436902117	-1.25737086773647	sa
LOC105203040	QA	21.8470896664986	0.297259275323424	1.07755291546055	13.8544173478097	17.2513464239697	118QA	south_america	31.1057637717794	0.297110879514449	-0.000137715565376498	sa
LOC105203040	QA	21.8470896664986	0.297259275323424	1.07755291546055	9.7322471969733	8.58163903714853	111BQA	south_america	18.3138862341218	-0.163607819944368	-0.427697877900332	sa
LOC105203040	QA	21.8470896664986	0.297259275323424	1.07755291546055	8.33619179905195	17.0441012998234	3QA	south_america	25.3802930988754	0.950621185879906	0.606338585495112	sa
LOC105203040	QA	21.8470896664986	0.297259275323424	1.07755291546055	9.69903995344391	8.58163903714853	43QA	south_america	18.2806789905924	-0.159136976586661	-0.423548807081109	sa
LOC105203040	QA	21.8470896664986	0.297259275323424	1.07755291546055	0	0	112BQA	south_america	0	0	-0.27586513020233	sa
LOC105203040	QH	12.0583860686545	-0.156919105199937	1.54693179210804	25.0648548526815	11.3675342714345	114CQH	south_america	36.432389124116	-1.07554792869623	-0.593839255345871	sa
LOC105203040	QH	12.0583860686545	-0.156919105199937	1.54693179210804	2.50648548526815	11.6307875097466	43QH	south_america	14.1372729950148	1.84884693044778	1.29660922729787	sa
LOC105203040	QH	12.0583860686545	-0.156919105199937	1.54693179210804	7.14286870268977	0	3QH	south_america	7.14286870268977	-3.02553714019678	-1.85439206151922	sa
LOC105203040	QH	12.0583860686545	-0.156919105199937	1.54693179210804	7.78579775757864	1.19047811711496	118QH	south_america	8.9762758746936	-2.00392748786019	-1.19398178515893	sa
LOC105203040	QH	12.0583860686545	-0.156919105199937	1.54693179210804	8.52565070357586	1.45384843871833	112BQH	south_america	9.97949914229419	-1.95677150335053	-1.16349822748028	sa
LOC105203040	QH	12.0583860686545	-0.156919105199937	1.54693179210804	16.3692493508657	0	111BQH	south_america	16.3692493508657	-4.11846350114152	-2.56090437610252	sa
LOC105203040	QT	8.50982237116692	0.182227205719409	1.1287051691787	6.44923176125102	2.50648548526815	112BQT	south_america	8.95571724651917	-1.08706589207073	-1.12455682179053	sa
LOC105203040	QT	8.50982237116692	0.182227205719409	1.1287051691787	5.64456874167781	2.41935875413686	111BQT	south_america	8.06392749581467	-0.958449769854313	-1.0106066727804	sa
LOC105203040	QT	8.50982237116692	0.182227205719409	1.1287051691787	6.42328315000238	4.71809032521064	118QT	south_america	11.141373475213	-0.376523989800939	-0.495037331960589	sa
LOC105203040	QT	8.50982237116692	0.182227205719409	1.1287051691787	18.6859146181887	3.87692916991555	114CQT	south_america	22.5628437881043	-2.01311881778613	-1.94501281951511	sa
LOC105203040	QT	8.50982237116692	0.182227205719409	1.1287051691787	2.49231160923143	2.25564274821782	3QT	south_america	4.74795435744925	-0.101239895482751	-0.251143619204318	sa
LOC105203040	QT	8.50982237116692	0.182227205719409	1.1287051691787	5.00595610500331	2.55798855915004	43QT	south_america	7.56394466415335	-0.755332059314055	-0.830650280192904	sa
LOC105203040	W	14.4768394811015	0.127073279071061	1.3566622902154	12.9763295959644	3.6880094641162	112W	south_america	16.6643390600806	-1.57593814866178	-1.25529502811083	sa
LOC105203040	W	14.4768394811015	0.127073279071061	1.3566622902154	13.8557713620627	3.78151872495341	114W	south_america	17.6372900870161	-1.63548268610895	-1.29918549213907	sa
LOC105203040	W	14.4768394811015	0.127073279071061	1.3566622902154	6.99709587202263	7.20001131555745	28W	south_america	14.1971071875801	0.0361497170321561	-0.0670200407976762	sa
LOC105203040	W	14.4768394811015	0.127073279071061	1.3566622902154	4.65231500389866	4.92649648428897	43CW	south_america	9.57881148818763	0.0683376217978742	-0.0432942359324081	sa
LOC105203040	W	14.4768394811015	0.127073279071061	1.3566622902154	0	2.50648548526815	3BW	south_america	2.50648548526815	1.81002575613728	1.24050951309262	sa
LOC105203040	W	14.4768394811015	0.127073279071061	1.3566622902154	9.7436008040867	5.0129709705363	104W	south_america	14.756571774623	-0.83732770658954	-0.710862970553625	sa
LOC105203040	whole_body_queen	15.1421378127791	0.0471818512520358	0.742792715921167	4.89979315343406	5.87975178412087	Queen1	north_america	10.7795449375549	0.221692140078784	0.234938072340048	no
LOC105203040	whole_body_queen	15.1421378127791	0.0471818512520358	0.742792715921167	6.03146692075984	14.4657975233671	Queen2	north_america	20.4972644441269	1.13718362650938	1.46743735081676	no
LOC105203040	whole_body_queen	15.1421378127791	0.0471818512520358	0.742792715921167	7.63024916333793	4.77362063462865	Queen4	north_america	12.4038697979666	-0.579925895951414	-0.84425672702747	no
LOC105203040	whole_body_queen	15.1421378127791	0.0471818512520358	0.742792715921167	9.46658794779946	11.9563670283624	Queen3	north_america	21.4229549761619	0.307870034559847	0.35095683859059	no
LOC105203040	whole_body_queen	15.1421378127791	0.0471818512520358	0.742792715921167	5.39294851940849	8.46918281070788	Queen5	north_america	13.8621313301164	0.566758450387375	0.699490703124345	no
LOC105203040	whole_body_queen	15.1421378127791	0.0471818512520358	0.742792715921167	6.27771638514657	10.1444279102952	Queen6	north_america	16.4221442954418	0.614764823861915	0.764120272646988	no
LOC105203040	whole_body_queen_taiwan	30.7713081578502	-0.0665560256069044	0.739710216204057	18.0605481352797	17.3699410098542	SBSb-virgin-queens-2	taiwan	35.4304891451338	-0.0532426146376909	0.0179981439725592	no
LOC105203040	whole_body_queen_taiwan	30.7713081578502	-0.0665560256069044	0.739710216204057	9.60020967734603	16.5119174932206	SBSb-virgin-queens-1	taiwan	26.1121271705666	0.724244260154728	1.06906768142226	no
LOC105203040	whole_body_queen_taiwan	30.7713081578502	-0.0665560256069044	0.739710216204057	15.5005536981579	22.8895813956414	SBSb-virgin-queens-4	taiwan	38.3901350937993	0.533867137596219	0.811700514674912	no
LOC105203040	whole_body_queen_taiwan	30.7713081578502	-0.0665560256069044	0.739710216204057	13	9	SBSb-virgin-queens-3	taiwan	22	-0.485426827170242	-0.566263372314689	no
LOC105203065	QA	37.532555074288	0.297259275323424	1.07755291546055	18.8156779141484	27.1751902843037	111BQA	south_america	45.9908681984521	0.50778302964338	0.195372079922384	all
LOC105203065	QA	37.532555074288	0.297259275323424	1.07755291546055	14.5485599301659	10.0119122100066	43QA	south_america	24.5604721401725	-0.497715954104396	-0.737759805594371	all
LOC105203065	QA	37.532555074288	0.297259275323424	1.07755291546055	15.7436560770565	13.3305858730675	118QA	south_america	29.074241950124	-0.224516991267052	-0.484223335210846	all
LOC105203065	QA	37.532555074288	0.297259275323424	1.07755291546055	99.6124124866679	173.809805098784	114CQA	south_america	273.422217585452	0.796977807557068	0.463753125311775	all
LOC105203065	QA	37.532555074288	0.297259275323424	1.07755291546055	0	0	112BQA	south_america	0	0	-0.27586513020233	all
LOC105203065	QA	37.532555074288	0.297259275323424	1.07755291546055	51.532822030503	33.0856084055396	3QA	south_america	84.6184304360426	-0.624056352829839	-0.855007317909295	all
LOC105203065	QH	22.9323159811403	-0.156919105199937	1.54693179210804	105.272390381262	97.7607947343366	114CQH	south_america	203.033185115599	-0.105756481577253	0.0330736131248317	all
LOC105203065	QH	22.9323159811403	-0.156919105199937	1.54693179210804	5.45641645028855	10.230780844291	111BQH	south_america	15.6871972945796	0.798652694600661	0.617720706676033	all
LOC105203065	QH	22.9323159811403	-0.156919105199937	1.54693179210804	10.3810636767715	10.7143030540347	118QH	south_america	21.0953667308062	0.0416357246323597	0.128353965472338	all
LOC105203065	QH	22.9323159811403	-0.156919105199937	1.54693179210804	10.0259419410726	5.81539375487332	43QH	south_america	15.8413356959459	-0.694032994507246	-0.34721239297524	all
LOC105203065	QH	22.9323159811403	-0.156919105199937	1.54693179210804	10.230780844291	14.5384843871833	112BQH	south_america	24.7692652314743	0.468387553436536	0.404223807298158	all
LOC105203065	QH	22.9323159811403	-0.156919105199937	1.54693179210804	125.000202297071	38.7961598137757	3QH	south_america	163.796362110847	-1.66272492229906	-0.973414487168262	all
LOC105203065	QT	89.0857029239091	0.182227205719409	1.1287051691787	45.1446223287571	42.108956152505	112BQT	south_america	87.2535784812621	-0.0981748974279757	-0.24842811994156	all
LOC105203065	QT	89.0857029239091	0.182227205719409	1.1287051691787	26.2770674318279	25.9494967886585	118QT	south_america	52.2265642204864	-0.017430213317831	-0.176890674809721	all
LOC105203065	QT	89.0857029239091	0.182227205719409	1.1287051691787	113.283357372769	81.4155125682265	114CQT	south_america	194.698869940996	-0.471627507202152	-0.57929628637861	all
LOC105203065	QT	89.0857029239091	0.182227205719409	1.1287051691787	14.3027317285809	8.52662853050014	43QT	south_america	22.829360259081	-0.683751574522786	-0.767232049510613	all
LOC105203065	QT	89.0857029239091	0.182227205719409	1.1287051691787	610.616344261699	274.060593908465	3QT	south_america	884.676938170164	-1.15287749125444	-1.18286398736469	all
LOC105203065	QT	89.0857029239091	0.182227205719409	1.1287051691787	46.3325017546054	44.5853256119506	111BQT	south_america	90.917827366556	-0.0542616969310857	-0.209522299629916	all
LOC105203065	W	34.3702017262508	0.127073279071061	1.3566622902154	12.9763295959644	10.4493601483292	112W	south_america	23.4256897442936	-0.28771856100268	-0.305744357358001	all
LOC105203065	W	34.3702017262508	0.127073279071061	1.3566622902154	27.2502921515252	7.51945645580446	3BW	south_america	34.7697486073297	-1.72943249322377	-1.36843618760869	all
LOC105203065	W	34.3702017262508	0.127073279071061	1.3566622902154	15.5897612865387	18.3808935586331	104W	south_america	33.9706548451718	0.224341960720287	0.0716970482269267	all
LOC105203065	W	34.3702017262508	0.127073279071061	1.3566622902154	423.98660367912	317.647572896086	114W	south_america	741.634176575206	-0.415455693756026	-0.399899795800287	all
LOC105203065	W	34.3702017262508	0.127073279071061	1.3566622902154	27.1137465040877	27.6923512136825	28W	south_america	54.8060977177702	0.0293904720798776	-0.0720023013064468	all
LOC105203065	W	34.3702017262508	0.127073279071061	1.3566622902154	8.52924417381421	7.38974472643346	43CW	south_america	15.9189889002477	-0.18373487451185	-0.229097658145686	all
LOC105203065	whole_body_queen	22.999302896061	0.0471818512520358	0.742792715921167	3.78663517911978	11.9563670283624	Queen3	north_america	15.7430022074822	1.43657748443061	1.87050250143544	all
LOC105203065	whole_body_queen	22.999302896061	0.0471818512520358	0.742792715921167	5.39294851940849	27.5248441348006	Queen5	north_america	32.9177926542091	2.15766562198469	2.84128226555825	all
LOC105203065	whole_body_queen	22.999302896061	0.0471818512520358	0.742792715921167	4.76890572708621	28.6417238077719	Queen4	north_america	33.4106295348581	2.36125975687061	3.11537506496519	all
LOC105203065	whole_body_queen	22.999302896061	0.0471818512520358	0.742792715921167	6.03146692075984	14.4657975233671	Queen2	north_america	20.4972644441269	1.13718362650938	1.46743735081676	all
LOC105203065	whole_body_queen	22.999302896061	0.0471818512520358	0.742792715921167	4.18514425676438	19.2744130295609	Queen6	north_america	23.4595572863253	1.96720411499349	2.58486953706911	all
LOC105203065	whole_body_queen	22.999302896061	0.0471818512520358	0.742792715921167	2.93987589206044	19.5991726137363	Queen1	north_america	22.5390485057967	2.38636430135124	3.14917257528338	all
LOC105203065	whole_body_queen_taiwan	35.8047983788379	-0.0665560256069044	0.739710216204057	10.6668996414956	62.9516854429035	SBSb-virgin-queens-1	taiwan	73.6185850843991	2.45456115113368	3.40824977337491	all
LOC105203065	whole_body_queen_taiwan	35.8047983788379	-0.0665560256069044	0.739710216204057	6	14	SBSb-virgin-queens-3	taiwan	20	1.09953567355091	1.57641691788685	all
LOC105203065	whole_body_queen_taiwan	35.8047983788379	-0.0665560256069044	0.739710216204057	10.0297700399845	24.7207479072928	SBSb-virgin-queens-4	taiwan	34.7505179472773	1.22152988147822	1.74133853888776	all
LOC105203065	whole_body_queen_taiwan	35.8047983788379	-0.0665560256069044	0.739710216204057	7.60444132011776	29.2546374902807	SBSb-virgin-queens-2	taiwan	36.8590788103984	1.81400287114919	2.54229136702543	all
LOC105204968	QA	7.09716575254635	0.297259275323424	1.07755291546055	2.07836570430941	2.86054634571618	43QA	south_america	4.93891205002559	0.326640401167927	0.0272665271681302	sa
LOC105204968	QA	7.09716575254635	0.297259275323424	1.07755291546055	0	18.0466954939307	3QA	south_america	18.0466954939307	4.25146881396793	3.66961982275783	sa
LOC105204968	QA	7.09716575254635	0.297259275323424	1.07755291546055	0	0	112BQA	south_america	0	0	-0.27586513020233	sa
LOC105204968	QA	7.09716575254635	0.297259275323424	1.07755291546055	0.629746243082259	8.62567321198485	118QA	south_america	9.25541945506711	2.56224009565573	2.10196714039259	sa
LOC105204968	QA	7.09716575254635	0.297259275323424	1.07755291546055	0.21627215993274	1.78784146607261	111BQA	south_america	2.00411362600535	1.19668243246425	0.834690477132079	sa
LOC105204968	QA	7.09716575254635	0.297259275323424	1.07755291546055	0.686982155080468	9.52382493691969	114CQA	south_america	10.2108070920002	2.6411425367149	2.17519086790248	sa
LOC105204968	QH	10.23337851281	-0.156919105199937	1.54693179210804	2.50648548526815	8.72309063230999	43QH	south_america	11.2295761175781	1.47138921316463	1.05260511592799	sa
LOC105204968	QH	10.23337851281	-0.156919105199937	1.54693179210804	2.50648548526815	9.09402741714759	114CQH	south_america	11.6005129024157	1.52540424911697	1.08752264508338	sa
LOC105204968	QH	10.23337851281	-0.156919105199937	1.54693179210804	0	7.26924219359166	112BQH	south_america	7.26924219359166	3.04775512460322	2.07163253490064	sa
LOC105204968	QH	10.23337851281	-0.156919105199937	1.54693179210804	0	9.23718090804182	3QH	south_america	9.23718090804182	3.35574657878684	2.27073081173152	sa
LOC105204968	QH	10.23337851281	-0.156919105199937	1.54693179210804	1.29763295959644	17.8571717567244	118QH	south_america	19.1548047163209	3.03689305839176	2.06461085090211	sa
LOC105204968	QH	10.23337851281	-0.156919105199937	1.54693179210804	0	1.70513014071517	111BQH	south_america	1.70513014071517	1.43569800212899	1.02953285688093	sa
LOC105204968	QT	14.6937919017199	0.182227205719409	1.1287051691787	4.29081951857427	3.41065141220006	43QT	south_america	7.70147093077432	-0.262499460940295	-0.394014910894144	sa
LOC105204968	QT	14.6937919017199	0.182227205719409	1.1287051691787	3.50360899091039	11.7952258130266	118QT	south_america	15.298834803937	1.50645212726874	1.17322482230935	sa
LOC105204968	QT	14.6937919017199	0.182227205719409	1.1287051691787	1.64633254965603	12.4424164498467	111BQT	south_america	14.0887489995027	2.34472623124362	1.91591133324724	sa
LOC105204968	QT	14.6937919017199	0.182227205719409	1.1287051691787	1.1678696636368	10.6615552172678	114CQT	south_america	11.8294248809046	2.42741027627338	1.98916699583088	sa
LOC105204968	QT	14.6937919017199	0.182227205719409	1.1287051691787	0	36.0902839714851	3QT	south_america	36.0902839714851	5.21296940836552	4.45709148856537	sa
LOC105204968	QT	14.6937919017199	0.182227205719409	1.1287051691787	1.20923095523457	21.5557751733061	112BQT	south_america	22.7650061285407	3.35188071545852	2.80822095644827	sa
LOC105204968	W	20.1548452134209	0.127073279071061	1.3566622902154	0	15.0389129116089	3BW	south_america	15.0389129116089	4.00350445674384	2.85732949580055	sa
LOC105204968	W	20.1548452134209	0.127073279071061	1.3566622902154	0	0	28W	south_america	0	0	-0.093666109825228	sa
LOC105204968	W	20.1548452134209	0.127073279071061	1.3566622902154	1.84743618160836	23.9496185913716	114W	south_america	25.7970547729799	3.13128234814163	2.21441186265566	sa
LOC105204968	W	20.1548452134209	0.127073279071061	1.3566622902154	3.2440823989911	41.7974405933169	112W	south_america	45.041522992308	3.33399995040033	2.36383563872783	sa
LOC105204968	W	20.1548452134209	0.127073279071061	1.3566622902154	3.10154333593244	22.1692341793004	43CW	south_america	25.2707775152328	2.49797158226557	1.74759652442177	sa
LOC105204968	W	20.1548452134209	0.127073279071061	1.3566622902154	2.43590020102168	12.5324274263408	104W	south_america	14.9683276273624	1.97766061322711	1.36407368842118	sa
LOC105204968	whole_body_queen	1.92529250232231	0.0471818512520358	0.742792715921167	1.90756229083448	0	Queen4	north_america	1.90756229083448	-1.53981009994109	-2.13652061628665	no
LOC105204968	whole_body_queen	1.92529250232231	0.0471818512520358	0.742792715921167	0	0.979958630686813	Queen1	north_america	0.979958630686813	0.985470286907668	1.26319014113113	no
LOC105204968	whole_body_queen	1.92529250232231	0.0471818512520358	0.742792715921167	1.0785897038817	2.11729570267697	Queen5	north_america	3.19588540655867	0.584690003221407	0.723631425629674	no
LOC105204968	whole_body_queen	1.92529250232231	0.0471818512520358	0.742792715921167	1.72327626307424	0	Queen2	north_america	1.72327626307424	-1.44534334417031	-2.00934279972226	no
LOC105204968	whole_body_queen	1.92529250232231	0.0471818512520358	0.742792715921167	0.946658794779946	0.996363919030199	Queen3	north_america	1.94302271381015	0.0363747004306876	-0.0145493494883641	no
LOC105204968	whole_body_queen	1.92529250232231	0.0471818512520358	0.742792715921167	1.04628606419109	1.01444279102952	Queen6	north_america	2.06072885522062	-0.0226270089030178	-0.0939816164843254	no
LOC105204968	whole_body_queen_taiwan	3.9460998336502	-0.0665560256069044	0.739710216204057	1.06668996414956	3.09598452997886	SBSb-virgin-queens-1	taiwan	4.16267449412842	0.986888288316849	1.42413108653504	no
LOC105204968	whole_body_queen_taiwan	3.9460998336502	-0.0665560256069044	0.739710216204057	1	2	SBSb-virgin-queens-3	taiwan	3	0.584962500721156	0.880775352368977	no
LOC105204968	whole_body_queen_taiwan	3.9460998336502	-0.0665560256069044	0.739710216204057	0.911797276362229	3.66233302330263	SBSb-virgin-queens-4	taiwan	4.57413029966486	1.28612250707166	1.82866006585667	no
LOC105204968	whole_body_queen_taiwan	3.9460998336502	-0.0665560256069044	0.739710216204057	1.90111033002944	1.82841484314254	SBSb-virgin-queens-2	taiwan	3.72952517317198	-0.0366114271590206	0.0404815261326921	no
LOC105204975	QA	0.701059370754756	0.297259275323424	1.07755291546055	0	10.0259419410726	3QA	south_america	10.0259419410726	3.46283000469883	2.93774039674185	sa
LOC105204975	QA	0.701059370754756	0.297259275323424	1.07755291546055	0	0	112BQA	south_america	0	0	-0.27586513020233	sa
LOC105204975	QA	0.701059370754756	0.297259275323424	1.07755291546055	0	4.70491266108265	118QA	south_america	4.70491266108265	2.51220479985533	2.05553295133097	sa
LOC105204975	QA	0.701059370754756	0.297259275323424	1.07755291546055	0.21627215993274	0.357568293214522	111BQA	south_america	0.573840453147262	0.15855868491541	-0.128718124574638	sa
LOC105204975	QA	0.701059370754756	0.297259275323424	1.07755291546055	0	0.715136586429044	43QA	south_america	0.715136586429044	0.778323471277037	0.446441366406592	sa
LOC105204975	QA	0.701059370754756	0.297259275323424	1.07755291546055	0.686982155080468	0	114CQA	south_america	0.686982155080468	-0.754444712858984	-0.976011454372901	sa
LOC105204975	QH	5.87183319665499	-0.156919105199937	1.54693179210804	2.50648548526815	0	114CQH	south_america	2.50648548526815	-1.81002575613728	-1.06863577267658	sa
LOC105204975	QH	5.87183319665499	-0.156919105199937	1.54693179210804	2.50648548526815	8.72309063230999	43QH	south_america	11.2295761175781	1.47138921316463	1.05260511592799	sa
LOC105204975	QH	5.87183319665499	-0.156919105199937	1.54693179210804	0	9.52382493691969	118QH	south_america	9.52382493691969	3.39558724957388	2.29648545132862	sa
LOC105204975	QH	5.87183319665499	-0.156919105199937	1.54693179210804	0	9.23718090804182	3QH	south_america	9.23718090804182	3.35574657878684	2.27073081173152	sa
LOC105204975	QH	5.87183319665499	-0.156919105199937	1.54693179210804	1.70513014071517	0	112BQH	south_america	1.70513014071517	-1.43569800212899	-0.826654997623675	sa
LOC105204975	QH	5.87183319665499	-0.156919105199937	1.54693179210804	0	1.70513014071517	111BQH	south_america	1.70513014071517	1.43569800212899	1.02953285688093	sa
LOC105204975	QT	7.07261655018988	0.182227205719409	1.1287051691787	1.75180449545519	5.8976129065133	118QT	south_america	7.6494174019685	1.32571919108829	1.01310068970531	sa
LOC105204975	QT	7.07261655018988	0.182227205719409	1.1287051691787	4.29081951857427	3.41065141220006	43QT	south_america	7.70147093077432	-0.262499460940295	-0.394014910894144	sa
LOC105204975	QT	7.07261655018988	0.182227205719409	1.1287051691787	1.1678696636368	5.81539375487332	114CQT	south_america	6.98326341851012	1.65251898840628	1.30263581919867	sa
LOC105204975	QT	7.07261655018988	0.182227205719409	1.1287051691787	0	1.12782137410891	3QT	south_america	1.12782137410891	1.0893770448693	0.8037084120116	sa
LOC105204975	QT	7.07261655018988	0.182227205719409	1.1287051691787	0.940761456946302	6.22120822492334	111BQT	south_america	7.16196968186965	1.89561743924083	1.51801398656495	sa
LOC105204975	QT	7.07261655018988	0.182227205719409	1.1287051691787	0	0.501297097053631	112BQT	south_america	0.501297097053631	0.586209505294724	0.357916584956613	sa
LOC105204975	W	1.07767110593821	0.127073279071061	1.3566622902154	0.923718090804182	0	114W	south_america	0.923718090804182	-0.943897396406448	-0.789415820872763	sa
LOC105204975	W	1.07767110593821	0.127073279071061	1.3566622902154	0.437318492001414	0	28W	south_america	0.437318492001414	-0.523379780597576	-0.479450976385114	sa
LOC105204975	W	1.07767110593821	0.127073279071061	1.3566622902154	3.2440823989911	41.7974405933169	112W	south_america	45.041522992308	3.33399995040033	2.36383563872783	sa
LOC105204975	W	1.07767110593821	0.127073279071061	1.3566622902154	0	0	3BW	south_america	0	0	-0.093666109825228	sa
LOC105204975	W	1.07767110593821	0.127073279071061	1.3566622902154	2.43590020102168	12.5324274263408	104W	south_america	14.9683276273624	1.97766061322711	1.36407368842118	sa
LOC105204975	W	1.07767110593821	0.127073279071061	1.3566622902154	0	1.23162412107224	43CW	south_america	1.23162412107224	1.15809405031617	0.759968622022668	sa
LOC105204975	whole_body_queen	0.967341378806271	0.0471818512520358	0.742792715921167	0.979958630686813	0	Queen1	north_america	0.979958630686813	-0.985470286907669	-1.39022922011166	no
LOC105204975	whole_body_queen	0.967341378806271	0.0471818512520358	0.742792715921167	1.0785897038817	0	Queen5	north_america	1.0785897038817	-1.05560501043652	-1.48464953687779	no
LOC105204975	whole_body_queen	0.967341378806271	0.0471818512520358	0.742792715921167	0	0.95472412692573	Queen4	north_america	0.95472412692573	0.966965012238482	1.23827703378295	no
LOC105204975	whole_body_queen	0.967341378806271	0.0471818512520358	0.742792715921167	0.86163813153712	0	Queen2	north_america	0.86163813153712	-0.896572666573614	-1.27054896688811	no
LOC105204975	whole_body_queen	0.967341378806271	0.0471818512520358	0.742792715921167	0.946658794779946	0	Queen3	north_america	0.946658794779946	-0.961000034434703	-1.35728563847917	no
LOC105204975	whole_body_queen	0.967341378806271	0.0471818512520358	0.742792715921167	0	1.01444279102952	Queen6	north_america	1.01444279102952	1.01038083439196	1.29672647899546	no
LOC105204975	whole_body_queen_taiwan	1.932381293293	-0.0665560256069044	0.739710216204057	0.911797276362229	0.915583255825657	SBSb-virgin-queens-4	taiwan	1.82738053218789	0.002854179526889	0.0938343199989627	no
LOC105204975	whole_body_queen_taiwan	1.932381293293	-0.0665560256069044	0.739710216204057	1.06668996414956	1.03199484332629	SBSb-virgin-queens-1	taiwan	2.09868480747585	-0.0244252372222371	0.0569558016933555	no
LOC105204975	whole_body_queen_taiwan	1.932381293293	-0.0665560256069044	0.739710216204057	0.95055516501472	0.914207421571271	SBSb-virgin-queens-2	taiwan	1.86476258658599	-0.0271376335436875	0.053288965326853	no
LOC105204975	whole_body_queen_taiwan	1.932381293293	-0.0665560256069044	0.739710216204057	1	1	SBSb-virgin-queens-3	taiwan	2	0	0.089975809646712	no
