# Supplementary material for: Genomic architecture and evolutionary antagonism drive allelic expression bias in the social supergene of red fire ants
Source: eLife journal article supplement (doi:10.7554/elife.55862), 2020-08-10
Supplement: supp [file elife-55862-supp-v1.zip › elife_poa_e55862_Figure_2_source_data_1.csv]

genome_region	gng_linkage_group	refseq_id	social_bias	social_bias_direction
recombining	lg1	LOC105198619	non-significant	Non-diff
recombining	lg1	LOC105198620	non-significant	Non-diff
recombining	lg1	LOC105198621	non-significant	Non-diff
recombining	lg1	LOC105198622	non-significant	Non-diff
recombining	lg1	LOC105198623	non-significant	Non-diff
recombining	lg1	LOC105198624	non-significant	Non-diff
recombining	lg1	LOC105198625	non-significant	Non-diff
recombining	lg1	LOC105198626	non-significant	Non-diff
recombining	lg1	LOC105198627	non-significant	Non-diff
recombining	lg1	LOC105198628	non-significant	Non-diff
recombining	lg1	LOC105198629	non-significant	Non-diff
recombining	lg1	LOC105198630	non-significant	Non-diff
recombining	lg1	LOC105198631	non-significant	Non-diff
recombining	lg1	LOC105198632	non-significant	Non-diff
recombining	lg1	LOC105198633	non-significant	Non-diff
recombining	lg1	LOC105198634	non-significant	Non-diff
recombining	lg1	LOC105198635	non-significant	Non-diff
recombining	lg1	LOC105198636	non-significant	Non-diff
recombining	lg1	LOC105198637	non-significant	Non-diff
recombining	lg1	LOC105198638	non-significant	Non-diff
recombining	lg1	LOC105198640	non-significant	Non-diff
recombining	lg1	LOC105198641	non-significant	Non-diff
recombining	lg1	LOC105198642	non-significant	Non-diff
recombining	lg1	LOC105198643	non-significant	Non-diff
recombining	lg1	LOC105198644	non-significant	Non-diff
recombining	lg1	LOC105198646	non-significant	Non-diff
recombining	lg1	LOC105198647	non-significant	Non-diff
recombining	lg1	LOC105198648	non-significant	Non-diff
recombining	lg1	LOC105198649	non-significant	Non-diff
recombining	lg1	LOC105198650	non-significant	Non-diff
recombining	lg1	LOC105198651	non-significant	Non-diff
recombining	lg1	LOC105198652	non-significant	Non-diff
recombining	lg1	LOC105198653	non-significant	Non-diff
recombining	lg1	LOC105198654	non-significant	Non-diff
recombining	lg1	LOC105198655	non-significant	Non-diff
recombining	lg1	LOC105198656	non-significant	Non-diff
recombining	lg1	LOC105198657	non-significant	Non-diff
recombining	lg1	LOC105198658	non-significant	Non-diff
recombining	lg1	LOC105198660	non-significant	Non-diff
recombining	lg1	LOC105198661	non-significant	Non-diff
recombining	lg1	LOC105198662	non-significant	Non-diff
recombining	lg1	LOC105198664	non-significant	Non-diff
recombining	lg1	LOC105198665	non-significant	Non-diff
recombining	lg1	LOC105198666	non-significant	Non-diff
recombining	lg1	LOC105198667	non-significant	Non-diff
recombining	lg1	LOC105198668	non-significant	Non-diff
recombining	lg1	LOC105198669	non-significant	Non-diff
recombining	lg1	LOC105198670	non-significant	Non-diff
recombining	lg1	LOC105198672	significant	Poly
recombining	lg1	LOC105198673	non-significant	Non-diff
recombining	lg1	LOC105198674	non-significant	Non-diff
recombining	lg1	LOC105198675	non-significant	Non-diff
recombining	lg1	LOC105198676	non-significant	Non-diff
recombining	lg1	LOC105198677	non-significant	Non-diff
recombining	lg1	LOC105198678	non-significant	Non-diff
recombining	lg1	LOC105198680	non-significant	Non-diff
recombining	lg1	LOC105198681	non-significant	Non-diff
recombining	lg1	LOC105198682	non-significant	Non-diff
recombining	lg1	LOC105198683	non-significant	Non-diff
recombining	lg1	LOC105198684	non-significant	Non-diff
recombining	lg1	LOC105198685	non-significant	Non-diff
recombining	lg1	LOC105198686	non-significant	Non-diff
recombining	lg1	LOC105198688	non-significant	Non-diff
recombining	lg1	LOC105198689	non-significant	Non-diff
recombining	lg1	LOC105198690	non-significant	Non-diff
recombining	lg1	LOC105198691	non-significant	Non-diff
recombining	lg1	LOC105198692	non-significant	Non-diff
recombining	lg1	LOC105198693	non-significant	Non-diff
recombining	lg1	LOC105198694	non-significant	Non-diff
recombining	lg1	LOC105198696	non-significant	Non-diff
recombining	lg1	LOC105198697	non-significant	Non-diff
recombining	lg1	LOC105198698	non-significant	Non-diff
recombining	lg1	LOC105198699	non-significant	Non-diff
recombining	lg1	LOC105198700	non-significant	Non-diff
recombining	lg1	LOC105198701	non-significant	Non-diff
recombining	lg1	LOC105198702	non-significant	Non-diff
recombining	lg1	LOC105198703	non-significant	Non-diff
recombining	lg1	LOC105198704	non-significant	Non-diff
recombining	lg1	LOC105198705	non-significant	Non-diff
recombining	lg1	LOC105198706	non-significant	Non-diff
recombining	lg1	LOC105198707	non-significant	Non-diff
recombining	lg1	LOC105198708	non-significant	Non-diff
recombining	lg1	LOC105198709	non-significant	Non-diff
recombining	lg1	LOC105198710	non-significant	Non-diff
recombining	lg1	LOC105198712	non-significant	Non-diff
recombining	lg1	LOC105198713	non-significant	Non-diff
recombining	lg1	LOC105198714	non-significant	Non-diff
recombining	lg1	LOC105201324	non-significant	Non-diff
recombining	lg1	LOC105201334	non-significant	Non-diff
recombining	lg1	LOC105201337	non-significant	Non-diff
recombining	lg1	LOC105201350	non-significant	Non-diff
recombining	lg1	LOC105201382	non-significant	Non-diff
recombining	lg1	LOC105201391	non-significant	Non-diff
recombining	lg1	LOC105201413	non-significant	Non-diff
recombining	lg1	LOC105201429	non-significant	Non-diff
recombining	lg1	LOC105201437	non-significant	Non-diff
recombining	lg1	LOC105201446	non-significant	Non-diff
recombining	lg1	LOC105201465	non-significant	Non-diff
recombining	lg1	LOC105201486	non-significant	Non-diff
recombining	lg1	LOC105201502	non-significant	Non-diff
recombining	lg1	LOC105201508	non-significant	Non-diff
recombining	lg1	LOC105201524	non-significant	Non-diff
recombining	lg1	LOC105201531	non-significant	Non-diff
recombining	lg1	LOC105201539	non-significant	Non-diff
recombining	lg1	LOC105201550	non-significant	Non-diff
recombining	lg1	LOC105201574	non-significant	Non-diff
recombining	lg1	LOC105201579	non-significant	Non-diff
recombining	lg1	LOC105201588	non-significant	Non-diff
recombining	lg1	LOC105201597	non-significant	Non-diff
recombining	lg1	LOC105201608	non-significant	Non-diff
recombining	lg1	LOC105201670	non-significant	Non-diff
recombining	lg1	LOC105201690	non-significant	Non-diff
recombining	lg1	LOC105201697	non-significant	Non-diff
recombining	lg1	LOC105201720	non-significant	Non-diff
recombining	lg1	LOC105201730	non-significant	Non-diff
recombining	lg1	LOC105201769	non-significant	Non-diff
recombining	lg1	LOC105201780	non-significant	Non-diff
recombining	lg1	LOC105201790	non-significant	Non-diff
recombining	lg1	LOC105201797	non-significant	Non-diff
recombining	lg1	LOC105201803	non-significant	Non-diff
recombining	lg1	LOC105201813	non-significant	Non-diff
recombining	lg1	LOC105201820	non-significant	Non-diff
recombining	lg1	LOC105201830	non-significant	Non-diff
recombining	lg1	LOC105201837	non-significant	Non-diff
recombining	lg1	LOC105201841	non-significant	Non-diff
recombining	lg1	LOC105201844	non-significant	Non-diff
recombining	lg1	LOC105201849	non-significant	Non-diff
recombining	lg1	LOC105201854	non-significant	Non-diff
recombining	lg1	LOC105208064	non-significant	Non-diff
recombining	lg1	LOC105208065	non-significant	Non-diff
recombining	lg1	LOC105208066	non-significant	Non-diff
recombining	lg1	LOC105208067	non-significant	Non-diff
recombining	lg1	LOC105208069	non-significant	Non-diff
recombining	lg1	LOC105208070	non-significant	Non-diff
recombining	lg1	LOC105208071	non-significant	Non-diff
recombining	lg1	LOC105208072	non-significant	Non-diff
recombining	lg1	LOC105208073	non-significant	Non-diff
recombining	lg1	LOC105208074	non-significant	Non-diff
recombining	lg1	LOC105208075	non-significant	Non-diff
recombining	lg1	LOC105208076	non-significant	Non-diff
recombining	lg1	LOC105208077	non-significant	Non-diff
recombining	lg1	LOC105208078	non-significant	Non-diff
recombining	lg1	LOC105208079	non-significant	Non-diff
recombining	lg1	LOC105208080	non-significant	Non-diff
recombining	lg1	LOC105208081	non-significant	Non-diff
recombining	lg1	LOC105208082	non-significant	Non-diff
recombining	lg1	LOC105208083	non-significant	Non-diff
recombining	lg1	LOC105208084	non-significant	Non-diff
recombining	lg1	LOC105208085	non-significant	Non-diff
recombining	lg1	LOC105208086	non-significant	Non-diff
recombining	lg1	LOC105208087	non-significant	Non-diff
recombining	lg1	LOC105208088	non-significant	Non-diff
recombining	lg1	LOC105208090	non-significant	Non-diff
recombining	lg1	LOC105208091	non-significant	Non-diff
recombining	lg1	LOC105208093	non-significant	Non-diff
recombining	lg1	LOC105208094	non-significant	Non-diff
recombining	lg1	LOC105208095	non-significant	Non-diff
recombining	lg1	LOC105208096	non-significant	Non-diff
recombining	lg1	LOC105208097	non-significant	Non-diff
recombining	lg1	LOC105208098	non-significant	Non-diff
recombining	lg1	LOC105208100	non-significant	Non-diff
recombining	lg1	LOC105208101	non-significant	Non-diff
recombining	lg1	LOC105208102	non-significant	Non-diff
recombining	lg1	LOC105208103	non-significant	Non-diff
recombining	lg1	LOC105208104	non-significant	Non-diff
recombining	lg1	LOC105208105	non-significant	Non-diff
recombining	lg1	LOC105208106	non-significant	Non-diff
recombining	lg1	LOC105208108	non-significant	Non-diff
recombining	lg1	LOC105208109	non-significant	Non-diff
recombining	lg1	LOC105208110	non-significant	Non-diff
recombining	lg1	LOC105208111	non-significant	Non-diff
recombining	lg1	LOC105208112	non-significant	Non-diff
recombining	lg1	LOC105208113	non-significant	Non-diff
recombining	lg1	LOC105203609	non-significant	Non-diff
recombining	lg1	LOC105203610	non-significant	Non-diff
recombining	lg1	LOC105203611	non-significant	Non-diff
recombining	lg1	LOC105203612	non-significant	Non-diff
recombining	lg1	LOC105203613	non-significant	Non-diff
recombining	lg1	LOC105203614	non-significant	Non-diff
recombining	lg1	LOC105203616	non-significant	Non-diff
recombining	lg1	LOC105203617	non-significant	Non-diff
recombining	lg1	LOC105203618	non-significant	Non-diff
recombining	lg1	LOC105203619	non-significant	Non-diff
recombining	lg1	LOC105203620	non-significant	Non-diff
recombining	lg1	LOC105203621	non-significant	Non-diff
recombining	lg1	LOC105203622	non-significant	Non-diff
recombining	lg1	LOC105203624	non-significant	Non-diff
recombining	lg1	LOC105203625	significant	Poly
recombining	lg1	LOC105203626	non-significant	Non-diff
recombining	lg1	LOC105203627	non-significant	Non-diff
recombining	lg1	LOC105203628	non-significant	Non-diff
recombining	lg1	LOC105203629	non-significant	Non-diff
recombining	lg1	LOC105203630	non-significant	Non-diff
recombining	lg1	LOC105203632	non-significant	Non-diff
recombining	lg1	LOC105203633	non-significant	Non-diff
recombining	lg1	LOC105203634	non-significant	Non-diff
recombining	lg1	LOC105203635	non-significant	Non-diff
recombining	lg1	LOC105203636	non-significant	Non-diff
recombining	lg1	LOC105203637	non-significant	Non-diff
recombining	lg1	LOC105203638	non-significant	Non-diff
recombining	lg1	LOC105203639	non-significant	Non-diff
recombining	lg1	LOC105203641	non-significant	Non-diff
recombining	lg1	LOC105203642	non-significant	Non-diff
recombining	lg1	LOC105203643	non-significant	Non-diff
recombining	lg1	LOC105203644	non-significant	Non-diff
recombining	lg1	LOC105203645	non-significant	Non-diff
recombining	lg1	LOC105203647	non-significant	Non-diff
recombining	lg1	LOC105203648	non-significant	Non-diff
recombining	lg1	LOC105203649	non-significant	Non-diff
recombining	lg1	LOC105203650	non-significant	Non-diff
recombining	lg1	LOC105203651	non-significant	Non-diff
recombining	lg1	LOC105203652	non-significant	Non-diff
recombining	lg1	LOC105203653	non-significant	Non-diff
recombining	lg1	LOC105203655	non-significant	Non-diff
recombining	lg1	LOC105203656	non-significant	Non-diff
recombining	lg1	LOC105203657	non-significant	Non-diff
recombining	lg1	LOC105203658	non-significant	Non-diff
recombining	lg1	LOC105203659	non-significant	Non-diff
recombining	lg1	LOC105203661	non-significant	Non-diff
recombining	lg1	LOC105203662	non-significant	Non-diff
recombining	lg1	LOC105203663	non-significant	Non-diff
recombining	lg1	LOC105203664	non-significant	Non-diff
recombining	lg1	LOC105203665	non-significant	Non-diff
recombining	lg1	LOC105203666	non-significant	Non-diff
recombining	lg1	LOC105203668	non-significant	Non-diff
recombining	lg1	LOC105203669	non-significant	Non-diff
recombining	lg1	LOC105203670	significant	Poly
recombining	lg1	LOC105203671	non-significant	Non-diff
recombining	lg1	LOC105203672	non-significant	Non-diff
recombining	lg1	LOC105203673	non-significant	Non-diff
recombining	lg1	LOC105203674	non-significant	Non-diff
recombining	lg1	LOC105203675	non-significant	Non-diff
recombining	lg1	LOC105203677	non-significant	Non-diff
recombining	lg1	LOC105203678	non-significant	Non-diff
recombining	lg1	LOC105203679	non-significant	Non-diff
recombining	lg1	LOC105197574	non-significant	Non-diff
recombining	lg1	LOC105197575	non-significant	Non-diff
recombining	lg1	LOC105197577	non-significant	Non-diff
recombining	lg1	LOC105197578	non-significant	Non-diff
recombining	lg1	LOC105197579	non-significant	Non-diff
recombining	lg1	LOC105197581	non-significant	Non-diff
recombining	lg1	LOC105197582	significant	Poly
recombining	lg1	LOC105197583	non-significant	Non-diff
recombining	lg1	LOC105197584	non-significant	Non-diff
recombining	lg1	LOC105197585	non-significant	Non-diff
recombining	lg1	LOC105197586	non-significant	Non-diff
recombining	lg1	LOC105197587	non-significant	Non-diff
recombining	lg1	LOC105197588	non-significant	Non-diff
recombining	lg1	LOC105197589	non-significant	Non-diff
recombining	lg1	LOC105197590	non-significant	Non-diff
recombining	lg1	LOC105197591	non-significant	Non-diff
recombining	lg1	LOC105197592	non-significant	Non-diff
recombining	lg1	LOC105197593	non-significant	Non-diff
recombining	lg1	Trnat-ugu	non-significant	Non-diff
recombining	lg1	LOC105201921	non-significant	Non-diff
recombining	lg1	LOC105201922	non-significant	Non-diff
recombining	lg1	LOC105201923	non-significant	Non-diff
recombining	lg1	LOC105201924	non-significant	Non-diff
recombining	lg1	LOC105201926	non-significant	Non-diff
recombining	lg1	LOC105201927	non-significant	Non-diff
recombining	lg1	LOC105201928	non-significant	Non-diff
recombining	lg1	LOC105201929	non-significant	Non-diff
recombining	lg1	LOC105201930	non-significant	Non-diff
recombining	lg1	LOC105201931	non-significant	Non-diff
recombining	lg1	LOC105201932	non-significant	Non-diff
recombining	lg1	LOC105201934	non-significant	Non-diff
recombining	lg1	LOC105201935	non-significant	Non-diff
recombining	lg1	LOC105201936	non-significant	Non-diff
recombining	lg1	LOC105201937	non-significant	Non-diff
recombining	lg1	LOC105201938	non-significant	Non-diff
recombining	lg1	LOC105201939	non-significant	Non-diff
recombining	lg1	LOC105201941	non-significant	Non-diff
recombining	lg1	LOC105201942	non-significant	Non-diff
recombining	lg1	LOC105201943	non-significant	Non-diff
recombining	lg1	LOC105201944	non-significant	Non-diff
recombining	lg1	LOC105201945	non-significant	Non-diff
recombining	lg1	LOC105201946	non-significant	Non-diff
recombining	lg1	LOC105201947	non-significant	Non-diff
recombining	lg1	LOC105201948	non-significant	Non-diff
recombining	lg1	LOC105201949	non-significant	Non-diff
recombining	lg1	LOC105201950	non-significant	Non-diff
recombining	lg1	LOC105201951	non-significant	Non-diff
recombining	lg1	LOC105201952	non-significant	Non-diff
recombining	lg1	LOC105201954	non-significant	Non-diff
recombining	lg1	LOC105201955	non-significant	Non-diff
recombining	lg1	LOC105201956	non-significant	Non-diff
recombining	lg1	LOC105201957	non-significant	Non-diff
recombining	lg1	LOC105201958	non-significant	Non-diff
recombining	lg1	LOC105201959	non-significant	Non-diff
recombining	lg1	LOC105201960	non-significant	Non-diff
recombining	lg1	LOC105201962	non-significant	Non-diff
recombining	lg1	LOC105201963	non-significant	Non-diff
recombining	lg1	LOC105201964	non-significant	Non-diff
recombining	lg1	LOC105201965	non-significant	Non-diff
recombining	lg1	LOC105201966	non-significant	Non-diff
recombining	lg1	LOC105201967	non-significant	Non-diff
recombining	lg1	LOC105201968	non-significant	Non-diff
recombining	lg1	LOC105201969	non-significant	Non-diff
recombining	lg1	LOC105201971	non-significant	Non-diff
recombining	lg1	LOC105201972	non-significant	Non-diff
recombining	lg1	LOC105201973	non-significant	Non-diff
recombining	lg1	LOC105201974	non-significant	Non-diff
recombining	lg1	LOC105201975	non-significant	Non-diff
recombining	lg1	LOC105201976	non-significant	Non-diff
recombining	lg1	LOC105201977	non-significant	Non-diff
recombining	lg1	LOC105201978	non-significant	Non-diff
recombining	lg1	LOC105201979	non-significant	Non-diff
recombining	lg1	LOC105201980	non-significant	Non-diff
recombining	lg1	LOC105201982	non-significant	Non-diff
recombining	lg1	LOC105201983	non-significant	Non-diff
recombining	lg1	LOC105201984	non-significant	Non-diff
recombining	lg1	LOC105201985	non-significant	Non-diff
recombining	lg1	LOC105201986	non-significant	Non-diff
recombining	lg1	LOC105201987	non-significant	Non-diff
recombining	lg1	LOC105201988	non-significant	Non-diff
recombining	lg1	LOC105201989	non-significant	Non-diff
recombining	lg1	LOC105201990	non-significant	Non-diff
recombining	lg1	LOC105201991	non-significant	Non-diff
recombining	lg1	LOC105201993	non-significant	Non-diff
recombining	lg1	LOC105201994	non-significant	Non-diff
recombining	lg1	LOC105201995	non-significant	Non-diff
recombining	lg1	LOC105201996	non-significant	Non-diff
recombining	lg1	LOC105201997	non-significant	Non-diff
recombining	lg1	LOC105201998	non-significant	Non-diff
recombining	lg1	LOC105202000	non-significant	Non-diff
recombining	lg1	LOC105202001	non-significant	Non-diff
recombining	lg1	LOC105202002	non-significant	Non-diff
recombining	lg1	LOC105202003	non-significant	Non-diff
recombining	lg1	LOC105202004	non-significant	Non-diff
recombining	lg1	LOC105202005	non-significant	Non-diff
recombining	lg1	LOC105202006	non-significant	Non-diff
recombining	lg1	LOC105202007	non-significant	Non-diff
recombining	lg1	LOC105202008	non-significant	Non-diff
recombining	lg1	LOC105202009	non-significant	Non-diff
recombining	lg1	LOC105202010	non-significant	Non-diff
recombining	lg1	LOC105202011	non-significant	Non-diff
recombining	lg1	LOC105202012	non-significant	Non-diff
recombining	lg1	LOC105202013	non-significant	Non-diff
recombining	lg1	LOC105202014	non-significant	Non-diff
recombining	lg1	LOC105202015	non-significant	Non-diff
recombining	lg1	LOC105202016	non-significant	Non-diff
recombining	lg1	LOC105202017	non-significant	Non-diff
recombining	lg1	LOC105202018	non-significant	Non-diff
recombining	lg1	LOC105202019	non-significant	Non-diff
recombining	lg1	LOC105202020	non-significant	Non-diff
recombining	lg1	LOC105202022	non-significant	Non-diff
recombining	lg1	LOC105202023	non-significant	Non-diff
recombining	lg1	LOC105202024	non-significant	Non-diff
recombining	lg1	LOC105202025	non-significant	Non-diff
recombining	lg1	LOC105202026	non-significant	Non-diff
recombining	lg1	LOC105202027	non-significant	Non-diff
recombining	lg1	LOC105202028	non-significant	Non-diff
recombining	lg1	LOC105202029	non-significant	Non-diff
recombining	lg1	LOC105202030	non-significant	Non-diff
recombining	lg1	LOC105202031	non-significant	Non-diff
recombining	lg1	LOC105202032	non-significant	Non-diff
recombining	lg1	LOC105202033	non-significant	Non-diff
recombining	lg1	LOC105202035	non-significant	Non-diff
recombining	lg1	LOC105202036	non-significant	Non-diff
recombining	lg1	LOC105202037	non-significant	Non-diff
recombining	lg1	LOC105202038	non-significant	Non-diff
recombining	lg1	LOC105202039	non-significant	Non-diff
recombining	lg1	LOC105202040	non-significant	Non-diff
recombining	lg1	LOC105202041	non-significant	Non-diff
recombining	lg1	LOC105202042	non-significant	Non-diff
recombining	lg1	LOC105202043	non-significant	Non-diff
recombining	lg1	LOC105202044	non-significant	Non-diff
recombining	lg1	LOC105202046	non-significant	Non-diff
recombining	lg1	LOC105202047	non-significant	Non-diff
recombining	lg1	LOC105202048	non-significant	Non-diff
recombining	lg1	LOC105202049	non-significant	Non-diff
recombining	lg1	LOC105202050	non-significant	Non-diff
recombining	lg1	LOC105202051	non-significant	Non-diff
recombining	lg1	LOC105202052	non-significant	Non-diff
recombining	lg1	LOC105202054	non-significant	Non-diff
recombining	lg1	LOC105202055	non-significant	Non-diff
recombining	lg1	LOC105202056	non-significant	Non-diff
recombining	lg1	LOC105202057	non-significant	Non-diff
recombining	lg1	LOC105202058	non-significant	Non-diff
recombining	lg1	LOC105202059	non-significant	Non-diff
recombining	lg1	LOC105202061	non-significant	Non-diff
recombining	lg1	LOC105202062	non-significant	Non-diff
recombining	lg1	LOC105202063	non-significant	Non-diff
recombining	lg1	LOC105202064	non-significant	Non-diff
recombining	lg1	LOC105202065	non-significant	Non-diff
recombining	lg1	LOC105202066	non-significant	Non-diff
recombining	lg1	LOC105202067	non-significant	Non-diff
recombining	lg1	LOC105202068	non-significant	Non-diff
recombining	lg1	LOC105202069	non-significant	Non-diff
recombining	lg1	LOC105202071	non-significant	Non-diff
recombining	lg1	LOC105202072	non-significant	Non-diff
recombining	lg1	LOC105202073	non-significant	Non-diff
recombining	lg1	LOC105202074	non-significant	Non-diff
recombining	lg1	LOC105202076	non-significant	Non-diff
recombining	lg1	LOC105202077	non-significant	Non-diff
recombining	lg1	LOC105202078	non-significant	Non-diff
recombining	lg1	LOC105202079	non-significant	Non-diff
recombining	lg1	LOC105202080	non-significant	Non-diff
recombining	lg1	LOC105202081	non-significant	Non-diff
recombining	lg1	LOC105202082	non-significant	Non-diff
recombining	lg1	LOC105202083	non-significant	Non-diff
recombining	lg1	LOC105202084	non-significant	Non-diff
recombining	lg1	LOC105202086	non-significant	Non-diff
recombining	lg1	LOC105202088	non-significant	Non-diff
recombining	lg1	LOC105202089	non-significant	Non-diff
recombining	lg1	LOC105202090	non-significant	Non-diff
recombining	lg1	LOC105202091	non-significant	Non-diff
recombining	lg1	LOC105202092	non-significant	Non-diff
recombining	lg1	LOC105202093	non-significant	Non-diff
recombining	lg1	LOC105202094	non-significant	Non-diff
recombining	lg1	LOC105202096	non-significant	Non-diff
recombining	lg1	LOC105202097	non-significant	Non-diff
recombining	lg1	LOC105202098	non-significant	Non-diff
recombining	lg1	LOC105202099	non-significant	Non-diff
recombining	lg1	LOC105202100	non-significant	Non-diff
recombining	lg1	LOC105202101	significant	Mono
recombining	lg1	LOC105202102	non-significant	Non-diff
recombining	lg1	LOC105202103	non-significant	Non-diff
recombining	lg1	LOC105202105	non-significant	Non-diff
recombining	lg1	LOC105202106	non-significant	Non-diff
recombining	lg1	LOC105202107	non-significant	Non-diff
recombining	lg1	LOC105202108	non-significant	Non-diff
recombining	lg1	LOC105202109	non-significant	Non-diff
recombining	lg1	LOC105202110	non-significant	Non-diff
recombining	lg1	LOC105202111	non-significant	Non-diff
recombining	lg1	LOC105202112	non-significant	Non-diff
recombining	lg1	LOC105202113	non-significant	Non-diff
recombining	lg1	LOC105202115	non-significant	Non-diff
recombining	lg1	LOC105202116	non-significant	Non-diff
recombining	lg1	LOC105202117	non-significant	Non-diff
recombining	lg1	LOC105202118	non-significant	Non-diff
recombining	lg1	LOC105202119	non-significant	Non-diff
recombining	lg1	LOC105202120	non-significant	Non-diff
recombining	lg1	LOC105202121	non-significant	Non-diff
recombining	lg1	LOC105202122	non-significant	Non-diff
recombining	lg1	LOC105202123	non-significant	Non-diff
recombining	lg1	LOC105202124	non-significant	Non-diff
recombining	lg1	LOC105202126	non-significant	Non-diff
recombining	lg1	Trnar-acg	non-significant	Non-diff
recombining	lg1	LOC105193254	non-significant	Non-diff
recombining	lg1	LOC105193255	non-significant	Non-diff
recombining	lg1	LOC105193256	non-significant	Non-diff
recombining	lg1	LOC105193257	non-significant	Non-diff
recombining	lg1	LOC105193258	non-significant	Non-diff
recombining	lg1	LOC105193259	non-significant	Non-diff
recombining	lg1	LOC105193260	non-significant	Non-diff
recombining	lg1	LOC105193261	non-significant	Non-diff
recombining	lg1	LOC105193262	non-significant	Non-diff
recombining	lg1	LOC105193263	non-significant	Non-diff
recombining	lg1	LOC105193264	non-significant	Non-diff
recombining	lg1	LOC105193267	non-significant	Non-diff
recombining	lg1	LOC105193268	non-significant	Non-diff
recombining	lg1	LOC105193269	non-significant	Non-diff
recombining	lg1	LOC105193270	non-significant	Non-diff
recombining	lg1	LOC105193271	significant	Poly
recombining	lg1	LOC105193272	non-significant	Non-diff
recombining	lg1	LOC105193273	non-significant	Non-diff
recombining	lg1	LOC105193274	non-significant	Non-diff
recombining	lg1	LOC105193275	non-significant	Non-diff
recombining	lg1	LOC105193276	non-significant	Non-diff
recombining	lg1	LOC105193277	non-significant	Non-diff
recombining	lg1	LOC105193278	non-significant	Non-diff
recombining	lg1	LOC105193279	non-significant	Non-diff
recombining	lg1	LOC105193280	non-significant	Non-diff
recombining	lg1	LOC105193281	non-significant	Non-diff
recombining	lg1	LOC105193282	non-significant	Non-diff
recombining	lg1	LOC105193283	non-significant	Non-diff
recombining	lg1	LOC105193284	non-significant	Non-diff
recombining	lg1	LOC105193285	non-significant	Non-diff
recombining	lg1	LOC105193286	non-significant	Non-diff
recombining	lg1	LOC105193287	non-significant	Non-diff
recombining	lg1	LOC105193288	non-significant	Non-diff
recombining	lg1	LOC105193290	non-significant	Non-diff
recombining	lg1	LOC105193291	non-significant	Non-diff
recombining	lg1	LOC105193292	non-significant	Non-diff
recombining	lg1	LOC105193293	non-significant	Non-diff
recombining	lg1	LOC105193294	non-significant	Non-diff
recombining	lg1	LOC105193295	significant	Poly
recombining	lg1	LOC105193296	non-significant	Non-diff
recombining	lg1	LOC105193298	non-significant	Non-diff
recombining	lg1	LOC105193299	non-significant	Non-diff
recombining	lg1	LOC105193300	non-significant	Non-diff
recombining	lg1	LOC105193301	non-significant	Non-diff
recombining	lg1	LOC105193302	non-significant	Non-diff
recombining	lg1	LOC105193303	non-significant	Non-diff
recombining	lg1	LOC105193304	non-significant	Non-diff
recombining	lg1	LOC105193305	non-significant	Non-diff
recombining	lg1	LOC105193306	non-significant	Non-diff
recombining	lg1	LOC105193307	non-significant	Non-diff
recombining	lg1	LOC105193308	non-significant	Non-diff
recombining	lg1	LOC105193309	non-significant	Non-diff
recombining	lg1	LOC105193310	non-significant	Non-diff
recombining	lg1	LOC105193311	non-significant	Non-diff
recombining	lg1	LOC105193312	non-significant	Non-diff
recombining	lg1	LOC105193313	non-significant	Non-diff
recombining	lg1	LOC105193314	non-significant	Non-diff
recombining	lg1	LOC105193316	non-significant	Non-diff
recombining	lg1	LOC105203727	non-significant	Non-diff
recombining	lg1	LOC105203728	non-significant	Non-diff
recombining	lg1	LOC105203729	non-significant	Non-diff
recombining	lg1	LOC105203730	non-significant	Non-diff
recombining	lg1	LOC105203731	non-significant	Non-diff
recombining	lg1	LOC105203732	non-significant	Non-diff
recombining	lg1	LOC105203734	non-significant	Non-diff
recombining	lg1	LOC105203735	non-significant	Non-diff
recombining	lg1	LOC105203736	non-significant	Non-diff
recombining	lg1	LOC105203737	non-significant	Non-diff
recombining	lg1	LOC105203738	non-significant	Non-diff
recombining	lg1	LOC105203739	non-significant	Non-diff
recombining	lg1	LOC105203740	non-significant	Non-diff
recombining	lg1	LOC105203742	non-significant	Non-diff
recombining	lg1	LOC105203743	non-significant	Non-diff
recombining	lg1	LOC105203744	non-significant	Non-diff
recombining	lg1	LOC105203745	non-significant	Non-diff
recombining	lg1	LOC105203746	non-significant	Non-diff
recombining	lg1	LOC105203747	non-significant	Non-diff
recombining	lg1	LOC105203748	non-significant	Non-diff
recombining	lg1	LOC105203750	non-significant	Non-diff
recombining	lg1	LOC105203751	non-significant	Non-diff
recombining	lg1	LOC105203752	non-significant	Non-diff
recombining	lg1	LOC105203753	non-significant	Non-diff
recombining	lg1	LOC105203754	non-significant	Non-diff
recombining	lg1	LOC105203755	non-significant	Non-diff
recombining	lg1	LOC105203756	non-significant	Non-diff
recombining	lg1	LOC105203757	non-significant	Non-diff
recombining	lg1	LOC105203758	non-significant	Non-diff
recombining	lg1	LOC105203759	non-significant	Non-diff
recombining	lg1	LOC105203761	non-significant	Non-diff
recombining	lg1	LOC105203762	non-significant	Non-diff
recombining	lg1	LOC105203763	non-significant	Non-diff
recombining	lg1	LOC105203764	non-significant	Non-diff
recombining	lg1	LOC105194735	non-significant	Non-diff
recombining	lg1	LOC105194736	non-significant	Non-diff
recombining	lg1	LOC105194737	non-significant	Non-diff
recombining	lg1	LOC105194739	significant	Poly
recombining	lg1	LOC105194740	non-significant	Non-diff
recombining	lg1	LOC105194741	non-significant	Non-diff
recombining	lg1	LOC105194742	non-significant	Non-diff
recombining	lg1	LOC105194743	non-significant	Non-diff
recombining	lg1	LOC105194744	non-significant	Non-diff
recombining	lg1	LOC105194745	non-significant	Non-diff
recombining	lg1	LOC105194746	non-significant	Non-diff
recombining	lg1	LOC105194747	non-significant	Non-diff
recombining	lg1	LOC105194748	non-significant	Non-diff
recombining	lg1	LOC105194749	non-significant	Non-diff
recombining	lg1	LOC105194750	non-significant	Non-diff
recombining	lg1	LOC105194751	non-significant	Non-diff
recombining	lg1	LOC105194752	non-significant	Non-diff
recombining	lg1	LOC105194753	non-significant	Non-diff
recombining	lg1	LOC105194754	non-significant	Non-diff
recombining	lg1	LOC105194756	non-significant	Non-diff
recombining	lg1	LOC105194757	non-significant	Non-diff
recombining	lg1	LOC105194758	non-significant	Non-diff
recombining	lg1	LOC105194759	non-significant	Non-diff
recombining	lg1	LOC105194760	non-significant	Non-diff
recombining	lg1	LOC105194761	non-significant	Non-diff
recombining	lg1	LOC105194762	non-significant	Non-diff
recombining	lg1	LOC105194764	non-significant	Non-diff
recombining	lg1	LOC105194765	non-significant	Non-diff
recombining	lg1	LOC105194766	non-significant	Non-diff
recombining	lg1	LOC105194767	non-significant	Non-diff
recombining	lg1	LOC105194768	non-significant	Non-diff
recombining	lg1	LOC105194769	non-significant	Non-diff
recombining	lg1	LOC105194771	non-significant	Non-diff
recombining	lg1	LOC105194772	non-significant	Non-diff
recombining	lg1	LOC105194773	non-significant	Non-diff
recombining	lg1	LOC105194774	non-significant	Non-diff
recombining	lg1	LOC105194775	non-significant	Non-diff
recombining	lg1	LOC105194776	non-significant	Non-diff
recombining	lg1	LOC105194778	non-significant	Non-diff
recombining	lg1	LOC105194779	non-significant	Non-diff
recombining	lg1	LOC105194780	non-significant	Non-diff
recombining	lg1	LOC105194781	non-significant	Non-diff
recombining	lg1	LOC105194782	non-significant	Non-diff
recombining	lg1	LOC105194783	non-significant	Non-diff
recombining	lg1	LOC105194785	non-significant	Non-diff
recombining	lg1	LOC105194786	non-significant	Non-diff
recombining	lg1	LOC105194787	non-significant	Non-diff
recombining	lg1	LOC105194788	non-significant	Non-diff
recombining	lg1	LOC105194789	non-significant	Non-diff
recombining	lg1	LOC105194790	non-significant	Non-diff
recombining	lg1	LOC105194791	non-significant	Non-diff
recombining	lg1	LOC105194792	non-significant	Non-diff
recombining	lg1	LOC105194793	non-significant	Non-diff
recombining	lg1	LOC105194794	non-significant	Non-diff
recombining	lg1	LOC105194796	non-significant	Non-diff
recombining	lg1	LOC105194797	non-significant	Non-diff
recombining	lg1	LOC105194798	non-significant	Non-diff
recombining	lg1	LOC105194799	non-significant	Non-diff
recombining	lg1	LOC105194800	non-significant	Non-diff
recombining	lg1	LOC105194801	non-significant	Non-diff
recombining	lg1	LOC105194802	non-significant	Non-diff
recombining	lg1	LOC105194803	non-significant	Non-diff
recombining	lg1	LOC105194804	non-significant	Non-diff
recombining	lg1	LOC105194805	non-significant	Non-diff
recombining	lg1	LOC105194806	non-significant	Non-diff
recombining	lg1	LOC105194807	non-significant	Non-diff
recombining	lg1	LOC105194808	non-significant	Non-diff
recombining	lg1	LOC105194809	non-significant	Non-diff
recombining	lg1	LOC105194810	non-significant	Non-diff
recombining	lg1	LOC105194812	non-significant	Non-diff
recombining	lg1	LOC105194813	non-significant	Non-diff
recombining	lg1	LOC105194814	non-significant	Non-diff
recombining	lg1	LOC105194815	non-significant	Non-diff
recombining	lg1	LOC105194816	non-significant	Non-diff
recombining	lg1	LOC105194817	non-significant	Non-diff
recombining	lg1	LOC105194819	non-significant	Non-diff
recombining	lg1	LOC105194820	non-significant	Non-diff
recombining	lg1	LOC105194821	non-significant	Non-diff
recombining	lg1	LOC105194822	non-significant	Non-diff
recombining	lg1	LOC105194823	non-significant	Non-diff
recombining	lg1	LOC105194824	non-significant	Non-diff
recombining	lg1	LOC105194826	non-significant	Non-diff
recombining	lg1	LOC105194827	non-significant	Non-diff
recombining	lg1	LOC105194828	significant	Poly
recombining	lg1	LOC105194829	non-significant	Non-diff
recombining	lg1	LOC105194830	non-significant	Non-diff
recombining	lg1	LOC105194831	non-significant	Non-diff
recombining	lg1	LOC105194832	non-significant	Non-diff
recombining	lg1	LOC105194833	non-significant	Non-diff
recombining	lg1	LOC105194834	non-significant	Non-diff
recombining	lg1	LOC105194835	non-significant	Non-diff
recombining	lg1	LOC105194837	non-significant	Non-diff
recombining	lg1	LOC105194838	non-significant	Non-diff
recombining	lg1	LOC105194839	non-significant	Non-diff
recombining	lg1	LOC105194840	non-significant	Non-diff
recombining	lg1	Trnan-guu	non-significant	Non-diff
recombining	lg1	Trnar-ucg	non-significant	Non-diff
recombining	lg1	Trnay-gua	non-significant	Non-diff
recombining	lg1	LOC105196410	significant	Poly
recombining	lg1	LOC105196411	non-significant	Non-diff
recombining	lg1	LOC105196412	non-significant	Non-diff
recombining	lg1	LOC105196413	non-significant	Non-diff
recombining	lg1	LOC105196414	non-significant	Non-diff
recombining	lg1	LOC105201123	non-significant	Non-diff
recombining	lg1	LOC105201124	non-significant	Non-diff
recombining	lg1	LOC105201125	non-significant	Non-diff
recombining	lg1	LOC105201126	non-significant	Non-diff
recombining	lg1	LOC105201127	non-significant	Non-diff
recombining	lg1	LOC105201128	non-significant	Non-diff
recombining	lg1	LOC105201129	non-significant	Non-diff
recombining	lg1	LOC105201130	non-significant	Non-diff
recombining	lg1	LOC105201131	non-significant	Non-diff
recombining	lg1	LOC105201132	non-significant	Non-diff
recombining	lg1	LOC105201133	non-significant	Non-diff
recombining	lg1	LOC105201134	non-significant	Non-diff
recombining	lg1	LOC105201135	non-significant	Non-diff
recombining	lg1	LOC105201136	non-significant	Non-diff
recombining	lg1	LOC105201137	significant	Mono
recombining	lg1	LOC105201138	non-significant	Non-diff
recombining	lg1	LOC105201139	non-significant	Non-diff
recombining	lg1	LOC105201140	non-significant	Non-diff
recombining	lg1	LOC105201141	non-significant	Non-diff
recombining	lg1	LOC105201142	non-significant	Non-diff
recombining	lg1	LOC105201143	non-significant	Non-diff
recombining	lg1	LOC105201144	non-significant	Non-diff
recombining	lg1	LOC105201145	non-significant	Non-diff
recombining	lg1	LOC105201146	non-significant	Non-diff
recombining	lg1	LOC105201147	non-significant	Non-diff
recombining	lg1	LOC105201148	non-significant	Non-diff
recombining	lg1	LOC105201150	non-significant	Non-diff
recombining	lg1	LOC105201151	non-significant	Non-diff
recombining	lg1	LOC105201152	non-significant	Non-diff
recombining	lg1	LOC105201153	non-significant	Non-diff
recombining	lg1	LOC105201154	non-significant	Non-diff
recombining	lg1	LOC105201155	non-significant	Non-diff
recombining	lg1	LOC105201156	non-significant	Non-diff
recombining	lg1	LOC105201157	non-significant	Non-diff
recombining	lg1	LOC105201158	non-significant	Non-diff
recombining	lg1	LOC105201159	non-significant	Non-diff
recombining	lg1	LOC105201160	non-significant	Non-diff
recombining	lg1	LOC105201161	non-significant	Non-diff
recombining	lg1	LOC105201162	non-significant	Non-diff
recombining	lg1	LOC105201163	non-significant	Non-diff
recombining	lg1	LOC105201164	non-significant	Non-diff
recombining	lg1	LOC105201165	non-significant	Non-diff
recombining	lg1	LOC105201166	non-significant	Non-diff
recombining	lg1	LOC105201167	non-significant	Non-diff
recombining	lg1	LOC105201168	non-significant	Non-diff
recombining	lg1	LOC105201169	non-significant	Non-diff
recombining	lg1	LOC105201170	non-significant	Non-diff
recombining	lg1	LOC105201171	non-significant	Non-diff
recombining	lg1	LOC105201172	non-significant	Non-diff
recombining	lg1	LOC105201173	non-significant	Non-diff
recombining	lg1	LOC105201174	non-significant	Non-diff
recombining	lg1	LOC105201175	non-significant	Non-diff
recombining	lg1	LOC105201176	non-significant	Non-diff
recombining	lg1	LOC105201177	non-significant	Non-diff
recombining	lg1	LOC105201178	non-significant	Non-diff
recombining	lg1	LOC105201180	non-significant	Non-diff
recombining	lg1	LOC105201181	non-significant	Non-diff
recombining	lg1	LOC105201182	non-significant	Non-diff
recombining	lg1	LOC105201183	non-significant	Non-diff
recombining	lg1	LOC105201184	non-significant	Non-diff
recombining	lg1	LOC105201185	non-significant	Non-diff
recombining	lg1	LOC105201187	non-significant	Non-diff
recombining	lg1	LOC105201188	non-significant	Non-diff
recombining	lg1	LOC105201189	non-significant	Non-diff
recombining	lg1	LOC105201190	non-significant	Non-diff
recombining	lg1	LOC105201191	non-significant	Non-diff
recombining	lg1	LOC105201192	non-significant	Non-diff
recombining	lg1	LOC105201193	non-significant	Non-diff
recombining	lg1	LOC105201194	non-significant	Non-diff
recombining	lg1	LOC105201195	non-significant	Non-diff
recombining	lg1	LOC105201196	non-significant	Non-diff
recombining	lg1	LOC105201198	non-significant	Non-diff
recombining	lg1	LOC105201199	non-significant	Non-diff
recombining	lg1	LOC105201200	non-significant	Non-diff
recombining	lg1	LOC105201201	non-significant	Non-diff
recombining	lg1	LOC105201202	non-significant	Non-diff
recombining	lg1	LOC105201203	non-significant	Non-diff
recombining	lg1	LOC105201204	non-significant	Non-diff
recombining	lg1	LOC105201205	non-significant	Non-diff
recombining	lg1	LOC105201206	non-significant	Non-diff
recombining	lg1	LOC105201207	non-significant	Non-diff
recombining	lg1	LOC105201208	non-significant	Non-diff
recombining	lg1	LOC105201209	non-significant	Non-diff
recombining	lg1	LOC105201211	non-significant	Non-diff
recombining	lg1	LOC105201212	non-significant	Non-diff
recombining	lg1	LOC105201213	non-significant	Non-diff
recombining	lg1	LOC105201214	significant	Mono
recombining	lg1	LOC105201215	non-significant	Non-diff
recombining	lg1	LOC105201216	non-significant	Non-diff
recombining	lg1	LOC105201217	non-significant	Non-diff
recombining	lg1	LOC105201218	non-significant	Non-diff
recombining	lg1	LOC105201219	non-significant	Non-diff
recombining	lg1	LOC105201221	non-significant	Non-diff
recombining	lg1	LOC105201222	non-significant	Non-diff
recombining	lg1	LOC105201223	non-significant	Non-diff
recombining	lg1	LOC105201224	non-significant	Non-diff
recombining	lg1	LOC105201225	non-significant	Non-diff
recombining	lg1	LOC105201227	non-significant	Non-diff
recombining	lg1	LOC105201228	non-significant	Non-diff
recombining	lg1	LOC105201229	non-significant	Non-diff
recombining	lg1	LOC105201230	non-significant	Non-diff
recombining	lg1	LOC105201231	non-significant	Non-diff
recombining	lg1	LOC105201232	non-significant	Non-diff
recombining	lg1	LOC105201233	non-significant	Non-diff
recombining	lg1	LOC105201234	non-significant	Non-diff
recombining	lg1	LOC105201235	non-significant	Non-diff
recombining	lg1	LOC105201236	non-significant	Non-diff
recombining	lg1	LOC105201238	non-significant	Non-diff
recombining	lg1	LOC105201239	non-significant	Non-diff
recombining	lg1	LOC105201240	non-significant	Non-diff
recombining	lg1	LOC105201241	non-significant	Non-diff
recombining	lg1	LOC105201242	non-significant	Non-diff
recombining	lg1	LOC105201243	non-significant	Non-diff
recombining	lg1	LOC105201244	non-significant	Non-diff
recombining	lg1	LOC105201245	non-significant	Non-diff
recombining	lg1	LOC105201246	non-significant	Non-diff
recombining	lg1	LOC105201247	non-significant	Non-diff
recombining	lg1	LOC105201249	non-significant	Non-diff
recombining	lg1	LOC105201250	non-significant	Non-diff
recombining	lg1	LOC105197934	non-significant	Non-diff
recombining	lg1	LOC105197936	non-significant	Non-diff
recombining	lg1	LOC105197937	non-significant	Non-diff
recombining	lg1	LOC105197938	non-significant	Non-diff
recombining	lg1	LOC105197939	non-significant	Non-diff
recombining	lg1	LOC105197940	non-significant	Non-diff
recombining	lg1	LOC105197941	non-significant	Non-diff
recombining	lg1	LOC105197942	non-significant	Non-diff
recombining	lg1	LOC105197945	non-significant	Non-diff
recombining	lg1	LOC105197946	non-significant	Non-diff
recombining	lg1	LOC105197947	non-significant	Non-diff
recombining	lg1	LOC105197948	non-significant	Non-diff
recombining	lg1	LOC105197949	non-significant	Non-diff
recombining	lg1	LOC105197950	non-significant	Non-diff
recombining	lg1	LOC105197951	non-significant	Non-diff
recombining	lg1	LOC105197952	non-significant	Non-diff
recombining	lg1	LOC105197953	non-significant	Non-diff
recombining	lg1	LOC105197954	non-significant	Non-diff
recombining	lg1	LOC105197956	non-significant	Non-diff
recombining	lg1	LOC105197957	non-significant	Non-diff
recombining	lg1	LOC105197958	non-significant	Non-diff
recombining	lg1	LOC105197959	non-significant	Non-diff
recombining	lg1	LOC105197960	non-significant	Non-diff
recombining	lg1	LOC105197961	non-significant	Non-diff
recombining	lg1	LOC105197962	non-significant	Non-diff
recombining	lg1	LOC105197963	non-significant	Non-diff
recombining	lg1	LOC105197964	non-significant	Non-diff
recombining	lg1	LOC105197965	non-significant	Non-diff
recombining	lg1	Trnad-guc	non-significant	Non-diff
recombining	lg1	Trnae-cuc	non-significant	Non-diff
recombining	lg1	LOC105195924	non-significant	Non-diff
recombining	lg1	LOC105195925	non-significant	Non-diff
recombining	lg1	LOC105195926	non-significant	Non-diff
recombining	lg1	LOC105195927	non-significant	Non-diff
recombining	lg1	LOC105195929	non-significant	Non-diff
recombining	lg1	LOC105195930	non-significant	Non-diff
recombining	lg1	LOC105195931	non-significant	Non-diff
recombining	lg1	LOC105195932	non-significant	Non-diff
recombining	lg1	LOC105195933	non-significant	Non-diff
recombining	lg1	LOC105195934	non-significant	Non-diff
recombining	lg1	LOC105195935	non-significant	Non-diff
recombining	lg1	LOC105195936	non-significant	Non-diff
recombining	lg1	Trnaa-agc	non-significant	Non-diff
recombining	lg1	LOC105194294	non-significant	Non-diff
recombining	lg1	LOC105194295	non-significant	Non-diff
recombining	lg1	LOC105194296	non-significant	Non-diff
recombining	lg1	LOC105194297	non-significant	Non-diff
recombining	lg1	LOC105194298	non-significant	Non-diff
recombining	lg1	LOC105194299	non-significant	Non-diff
recombining	lg1	LOC105194301	non-significant	Non-diff
recombining	lg1	LOC105194302	non-significant	Non-diff
recombining	lg1	LOC105194303	non-significant	Non-diff
recombining	lg1	LOC105194304	non-significant	Non-diff
recombining	lg1	LOC105194306	non-significant	Non-diff
recombining	lg1	LOC105194307	non-significant	Non-diff
recombining	lg1	LOC105194308	non-significant	Non-diff
recombining	lg1	LOC105194309	non-significant	Non-diff
recombining	lg1	LOC105194310	non-significant	Non-diff
recombining	lg1	LOC105194311	non-significant	Non-diff
recombining	lg1	LOC105194312	non-significant	Non-diff
recombining	lg1	LOC105194314	non-significant	Non-diff
recombining	lg1	LOC105194315	non-significant	Non-diff
recombining	lg1	LOC105194316	non-significant	Non-diff
recombining	lg1	LOC105194317	non-significant	Non-diff
recombining	lg1	LOC105194318	non-significant	Non-diff
recombining	lg1	LOC105194319	non-significant	Non-diff
recombining	lg1	LOC105194320	non-significant	Non-diff
recombining	lg1	LOC105194321	non-significant	Non-diff
recombining	lg1	LOC105194322	non-significant	Non-diff
recombining	lg1	LOC105194323	non-significant	Non-diff
recombining	lg1	LOC105194324	significant	Poly
recombining	lg1	LOC105194325	non-significant	Non-diff
recombining	lg1	LOC105194326	non-significant	Non-diff
recombining	lg1	LOC105194328	non-significant	Non-diff
recombining	lg1	LOC105194329	non-significant	Non-diff
recombining	lg1	LOC105194330	non-significant	Non-diff
recombining	lg1	LOC105194331	significant	Poly
recombining	lg1	LOC105194332	non-significant	Non-diff
recombining	lg1	LOC105194333	non-significant	Non-diff
recombining	lg1	LOC105194334	non-significant	Non-diff
recombining	lg1	LOC105194335	non-significant	Non-diff
recombining	lg1	LOC105194336	non-significant	Non-diff
recombining	lg1	LOC105194337	non-significant	Non-diff
recombining	lg1	LOC105194338	non-significant	Non-diff
recombining	lg1	LOC105194339	non-significant	Non-diff
recombining	lg1	LOC105194340	non-significant	Non-diff
recombining	lg1	LOC105194341	non-significant	Non-diff
recombining	lg1	LOC105194342	non-significant	Non-diff
recombining	lg1	LOC105194343	non-significant	Non-diff
recombining	lg1	LOC105194344	non-significant	Non-diff
recombining	lg1	LOC105194345	non-significant	Non-diff
recombining	lg1	LOC105194346	non-significant	Non-diff
recombining	lg1	LOC105194347	non-significant	Non-diff
recombining	lg1	LOC105194349	non-significant	Non-diff
recombining	lg1	LOC105194350	non-significant	Non-diff
recombining	lg1	LOC105194351	non-significant	Non-diff
recombining	lg1	LOC105194352	non-significant	Non-diff
recombining	lg1	LOC105194353	non-significant	Non-diff
recombining	lg1	LOC105194354	non-significant	Non-diff
recombining	lg1	LOC105193368	non-significant	Non-diff
recombining	lg1	LOC105193369	non-significant	Non-diff
recombining	lg1	LOC105193370	non-significant	Non-diff
recombining	lg1	LOC105193371	non-significant	Non-diff
recombining	lg1	LOC105193373	non-significant	Non-diff
recombining	lg1	LOC105193374	non-significant	Non-diff
recombining	lg1	LOC105193375	significant	Poly
recombining	lg1	LOC105193376	non-significant	Non-diff
recombining	lg1	LOC105193377	non-significant	Non-diff
recombining	lg1	LOC105193378	non-significant	Non-diff
recombining	lg1	LOC105193379	non-significant	Non-diff
recombining	lg1	LOC105193380	non-significant	Non-diff
recombining	lg1	LOC105193381	non-significant	Non-diff
recombining	lg1	LOC105193382	non-significant	Non-diff
recombining	lg1	LOC105193383	non-significant	Non-diff
recombining	lg1	LOC105193384	non-significant	Non-diff
recombining	lg1	LOC105193386	non-significant	Non-diff
recombining	lg1	LOC105193387	non-significant	Non-diff
recombining	lg1	LOC105193388	non-significant	Non-diff
recombining	lg1	LOC105193389	non-significant	Non-diff
recombining	lg1	LOC105193390	non-significant	Non-diff
recombining	lg1	LOC105193391	non-significant	Non-diff
recombining	lg1	LOC105193392	non-significant	Non-diff
recombining	lg1	LOC105193393	non-significant	Non-diff
recombining	lg1	LOC105193395	non-significant	Non-diff
recombining	lg1	LOC105193396	non-significant	Non-diff
recombining	lg1	LOC105193397	non-significant	Non-diff
recombining	lg1	LOC105193398	non-significant	Non-diff
recombining	lg1	LOC105208033	non-significant	Non-diff
recombining	lg1	LOC105208034	non-significant	Non-diff
recombining	lg1	LOC105208035	non-significant	Non-diff
recombining	lg1	LOC105208036	non-significant	Non-diff
recombining	lg1	LOC105208038	non-significant	Non-diff
recombining	lg1	LOC105208039	non-significant	Non-diff
recombining	lg1	LOC105208040	non-significant	Non-diff
recombining	lg1	LOC105208041	non-significant	Non-diff
recombining	lg1	LOC105207082	non-significant	Non-diff
recombining	lg1	LOC105207088	non-significant	Non-diff
recombining	lg1	LOC105207106	non-significant	Non-diff
recombining	lg1	LOC105207113	non-significant	Non-diff
recombining	lg1	LOC105207120	non-significant	Non-diff
recombining	lg1	LOC105207129	non-significant	Non-diff
recombining	lg1	LOC105207136	non-significant	Non-diff
recombining	lg1	LOC105207146	non-significant	Non-diff
recombining	lg1	LOC105200446	non-significant	Non-diff
recombining	lg1	LOC105200447	non-significant	Non-diff
recombining	lg1	LOC105200448	non-significant	Non-diff
recombining	lg1	LOC105200449	non-significant	Non-diff
recombining	lg1	LOC105200450	non-significant	Non-diff
recombining	lg1	LOC105205346	non-significant	Non-diff
recombining	lg1	LOC105205347	non-significant	Non-diff
recombining	lg1	LOC105202191	non-significant	Non-diff
recombining	lg1	LOC105202192	non-significant	Non-diff
recombining	lg1	LOC105202193	non-significant	Non-diff
recombining	lg1	LOC105202194	non-significant	Non-diff
recombining	lg1	LOC105202195	non-significant	Non-diff
recombining	lg1	LOC105199540	non-significant	Non-diff
recombining	lg1	LOC105199541	non-significant	Non-diff
recombining	lg1	LOC105199542	non-significant	Non-diff
recombining	lg1	LOC105199543	non-significant	Non-diff
recombining	lg1	LOC105205627	significant	Poly
recombining	lg1	LOC105205641	non-significant	Non-diff
recombining	lg1	LOC105205650	non-significant	Non-diff
recombining	lg1	LOC105205656	non-significant	Non-diff
recombining	lg1	LOC105205665	non-significant	Non-diff
recombining	lg1	LOC105205668	non-significant	Non-diff
recombining	lg1	LOC105198586	non-significant	Non-diff
recombining	lg1	LOC105198587	non-significant	Non-diff
recombining	lg1	LOC105195900	non-significant	Non-diff
recombining	lg1	LOC105195901	non-significant	Non-diff
recombining	lg1	Trnas-gga	non-significant	Non-diff
recombining	lg1	LOC105198267	non-significant	Non-diff
recombining	lg1	LOC105198268	significant	Poly
recombining	lg1	LOC105198269	non-significant	Non-diff
recombining	lg1	LOC105198270	non-significant	Non-diff
recombining	lg1	LOC105198272	significant	Poly
recombining	lg1	LOC105198273	non-significant	Non-diff
recombining	lg1	LOC105202144	non-significant	Non-diff
recombining	lg1	LOC105193768	non-significant	Non-diff
recombining	lg1	LOC105193769	non-significant	Non-diff
recombining	lg1	LOC105193770	non-significant	Non-diff
recombining	lg1	LOC105193771	non-significant	Non-diff
recombining	lg1	LOC105193772	non-significant	Non-diff
recombining	lg1	LOC105193773	non-significant	Non-diff
recombining	lg1	LOC105193774	non-significant	Non-diff
recombining	lg1	LOC105193776	non-significant	Non-diff
recombining	lg1	LOC105193777	non-significant	Non-diff
recombining	lg1	LOC105193778	non-significant	Non-diff
recombining	lg1	LOC105197629	non-significant	Non-diff
recombining	lg1	LOC105197630	non-significant	Non-diff
recombining	lg1	LOC105197631	non-significant	Non-diff
recombining	lg1	LOC105203545	non-significant	Non-diff
recombining	lg1	LOC105203546	non-significant	Non-diff
recombining	lg1	LOC105203548	non-significant	Non-diff
recombining	lg1	LOC105203549	non-significant	Non-diff
recombining	lg1	LOC105203550	non-significant	Non-diff
recombining	lg1	LOC105203551	non-significant	Non-diff
recombining	lg1	LOC105197313	non-significant	Non-diff
recombining	lg1	LOC105197314	non-significant	Non-diff
recombining	lg1	LOC105197315	non-significant	Non-diff
recombining	lg1	LOC105205054	non-significant	Non-diff
recombining	lg1	LOC105205055	non-significant	Non-diff
recombining	lg1	LOC105205056	non-significant	Non-diff
recombining	lg1	LOC105205057	non-significant	Non-diff
recombining	lg1	LOC105205058	non-significant	Non-diff
recombining	lg1	LOC105205059	non-significant	Non-diff
recombining	lg1	LOC105205060	non-significant	Non-diff
recombining	lg1	LOC105205061	non-significant	Non-diff
recombining	lg1	LOC105205062	non-significant	Non-diff
recombining	lg1	LOC105205063	non-significant	Non-diff
recombining	lg1	LOC105205064	non-significant	Non-diff
recombining	lg1	LOC105198916	non-significant	Non-diff
recombining	lg1	LOC105207372	non-significant	Non-diff
recombining	lg1	LOC105207373	non-significant	Non-diff
recombining	lg1	LOC105207375	non-significant	Non-diff
recombining	lg1	LOC105207376	non-significant	Non-diff
recombining	lg1	LOC105207377	non-significant	Non-diff
recombining	lg1	LOC105205735	non-significant	Non-diff
recombining	lg1	LOC105205743	non-significant	Non-diff
recombining	lg1	LOC105205386	non-significant	Non-diff
recombining	lg1	LOC105205387	non-significant	Non-diff
recombining	lg1	LOC105205388	non-significant	Non-diff
recombining	lg1	LOC105205390	non-significant	Non-diff
recombining	lg1	LOC105205391	non-significant	Non-diff
recombining	lg1	LOC105205392	non-significant	Non-diff
recombining	lg1	LOC105205393	non-significant	Non-diff
recombining	lg1	LOC105203909	non-significant	Non-diff
recombining	lg1	LOC105203910	non-significant	Non-diff
recombining	lg1	LOC105203911	non-significant	Non-diff
recombining	lg1	LOC105202923	non-significant	Non-diff
recombining	lg1	LOC105202924	significant	Poly
recombining	lg1	LOC105202925	non-significant	Non-diff
recombining	lg1	LOC105202926	non-significant	Non-diff
recombining	lg1	LOC105202128	non-significant	Non-diff
recombining	lg1	LOC105207483	non-significant	Non-diff
recombining	lg1	LOC105197093	non-significant	Non-diff
recombining	lg1	LOC105197094	non-significant	Non-diff
recombining	lg1	LOC105193366	non-significant	Non-diff
recombining	lg1	LOC105194958	non-significant	Non-diff
recombining	lg1	LOC105194962	non-significant	Non-diff
recombining	lg1	LOC105198755	non-significant	Non-diff
recombining	lg1	LOC105198756	non-significant	Non-diff
recombining	lg1	LOC105198757	non-significant	Non-diff
recombining	lg1	LOC105198758	non-significant	Non-diff
recombining	lg1	LOC105198759	non-significant	Non-diff
recombining	lg2	LOC105200815	non-significant	Non-diff
recombining	lg2	LOC105194955	non-significant	Non-diff
recombining	lg2	LOC105194956	non-significant	Non-diff
recombining	lg2	LOC105194957	non-significant	Non-diff
recombining	lg2	LOC105194959	non-significant	Non-diff
recombining	lg2	LOC105194960	non-significant	Non-diff
recombining	lg2	LOC105194961	non-significant	Non-diff
recombining	lg2	LOC105194963	non-significant	Non-diff
recombining	lg2	LOC105194964	non-significant	Non-diff
recombining	lg2	LOC105194965	non-significant	Non-diff
recombining	lg2	LOC105194966	non-significant	Non-diff
recombining	lg2	LOC105194967	non-significant	Non-diff
recombining	lg2	LOC105194968	non-significant	Non-diff
recombining	lg2	LOC105194969	non-significant	Non-diff
recombining	lg2	LOC105194970	non-significant	Non-diff
recombining	lg2	LOC105194971	non-significant	Non-diff
recombining	lg2	LOC105194972	non-significant	Non-diff
recombining	lg2	LOC105194973	non-significant	Non-diff
recombining	lg2	LOC105194974	non-significant	Non-diff
recombining	lg2	LOC105194975	non-significant	Non-diff
recombining	lg2	LOC105194976	non-significant	Non-diff
recombining	lg2	LOC105194977	non-significant	Non-diff
recombining	lg2	LOC105194978	non-significant	Non-diff
recombining	lg2	LOC105194979	non-significant	Non-diff
recombining	lg2	LOC105194980	non-significant	Non-diff
recombining	lg2	LOC105194981	non-significant	Non-diff
recombining	lg2	LOC105194982	non-significant	Non-diff
recombining	lg2	LOC105194983	non-significant	Non-diff
recombining	lg2	LOC105194985	non-significant	Non-diff
recombining	lg2	LOC105194986	non-significant	Non-diff
recombining	lg2	LOC105194987	non-significant	Non-diff
recombining	lg2	LOC105194988	non-significant	Non-diff
recombining	lg2	LOC105194990	non-significant	Non-diff
recombining	lg2	LOC105194991	non-significant	Non-diff
recombining	lg2	LOC105194992	non-significant	Non-diff
recombining	lg2	LOC105194993	non-significant	Non-diff
recombining	lg2	LOC105194994	non-significant	Non-diff
recombining	lg2	LOC105194995	non-significant	Non-diff
recombining	lg2	LOC105194996	non-significant	Non-diff
recombining	lg2	LOC105194997	non-significant	Non-diff
recombining	lg2	LOC105194998	non-significant	Non-diff
recombining	lg2	LOC105194999	non-significant	Non-diff
recombining	lg2	LOC105195000	non-significant	Non-diff
recombining	lg2	LOC105195001	non-significant	Non-diff
recombining	lg2	LOC105195002	non-significant	Non-diff
recombining	lg2	LOC105195003	non-significant	Non-diff
recombining	lg2	LOC105195004	non-significant	Non-diff
recombining	lg2	LOC105195006	non-significant	Non-diff
recombining	lg2	LOC105195007	non-significant	Non-diff
recombining	lg2	LOC105195008	non-significant	Non-diff
recombining	lg2	LOC105195009	non-significant	Non-diff
recombining	lg2	LOC105195010	non-significant	Non-diff
recombining	lg2	LOC105195012	non-significant	Non-diff
recombining	lg2	LOC105195013	non-significant	Non-diff
recombining	lg2	LOC105195014	non-significant	Non-diff
recombining	lg2	LOC105195015	non-significant	Non-diff
recombining	lg2	LOC105195016	non-significant	Non-diff
recombining	lg2	LOC105195017	non-significant	Non-diff
recombining	lg2	LOC105195018	non-significant	Non-diff
recombining	lg2	LOC105195020	non-significant	Non-diff
recombining	lg2	LOC105195021	non-significant	Non-diff
recombining	lg2	LOC105195022	non-significant	Non-diff
recombining	lg2	LOC105195023	non-significant	Non-diff
recombining	lg2	LOC105195024	non-significant	Non-diff
recombining	lg2	LOC105195025	non-significant	Non-diff
recombining	lg2	LOC105195026	non-significant	Non-diff
recombining	lg2	LOC105195027	non-significant	Non-diff
recombining	lg2	LOC105195028	non-significant	Non-diff
recombining	lg2	LOC105195030	non-significant	Non-diff
recombining	lg2	LOC105195031	non-significant	Non-diff
recombining	lg2	LOC105195032	non-significant	Non-diff
recombining	lg2	LOC105196741	non-significant	Non-diff
recombining	lg2	LOC105196742	non-significant	Non-diff
recombining	lg2	LOC105196743	non-significant	Non-diff
recombining	lg2	LOC105196744	non-significant	Non-diff
recombining	lg2	LOC105196745	non-significant	Non-diff
recombining	lg2	LOC105196747	non-significant	Non-diff
recombining	lg2	LOC105196748	non-significant	Non-diff
recombining	lg2	LOC105196749	non-significant	Non-diff
recombining	lg2	LOC105196750	non-significant	Non-diff
recombining	lg2	LOC105196751	non-significant	Non-diff
recombining	lg2	LOC105196752	non-significant	Non-diff
recombining	lg2	LOC105196753	non-significant	Non-diff
recombining	lg2	LOC105196754	non-significant	Non-diff
recombining	lg2	LOC105196756	non-significant	Non-diff
recombining	lg2	LOC105196757	non-significant	Non-diff
recombining	lg2	LOC105196758	non-significant	Non-diff
recombining	lg2	LOC105196759	non-significant	Non-diff
recombining	lg2	LOC105196760	non-significant	Non-diff
recombining	lg2	LOC105196761	non-significant	Non-diff
recombining	lg2	LOC105196762	non-significant	Non-diff
recombining	lg2	LOC105196763	non-significant	Non-diff
recombining	lg2	LOC105196764	non-significant	Non-diff
recombining	lg2	LOC105196765	non-significant	Non-diff
recombining	lg2	LOC105196766	non-significant	Non-diff
recombining	lg2	LOC105196767	non-significant	Non-diff
recombining	lg2	LOC105196769	non-significant	Non-diff
recombining	lg2	LOC105196770	non-significant	Non-diff
recombining	lg2	LOC105196771	non-significant	Non-diff
recombining	lg2	LOC105196772	non-significant	Non-diff
recombining	lg2	LOC105196773	non-significant	Non-diff
recombining	lg2	LOC105196774	non-significant	Non-diff
recombining	lg2	LOC105196775	non-significant	Non-diff
recombining	lg2	LOC105196776	non-significant	Non-diff
recombining	lg2	LOC105196777	non-significant	Non-diff
recombining	lg2	LOC105196778	non-significant	Non-diff
recombining	lg2	LOC105196779	non-significant	Non-diff
recombining	lg2	LOC105196780	non-significant	Non-diff
recombining	lg2	LOC105196781	non-significant	Non-diff
recombining	lg2	LOC105196782	non-significant	Non-diff
recombining	lg2	LOC105196783	non-significant	Non-diff
recombining	lg2	LOC105196784	non-significant	Non-diff
recombining	lg2	LOC105196786	non-significant	Non-diff
recombining	lg2	LOC105196787	non-significant	Non-diff
recombining	lg2	LOC105196788	non-significant	Non-diff
recombining	lg2	LOC105196789	non-significant	Non-diff
recombining	lg2	LOC105196790	non-significant	Non-diff
recombining	lg2	LOC105196791	non-significant	Non-diff
recombining	lg2	LOC105196792	non-significant	Non-diff
recombining	lg2	LOC105196793	non-significant	Non-diff
recombining	lg2	LOC105196794	non-significant	Non-diff
recombining	lg2	LOC105196797	non-significant	Non-diff
recombining	lg2	LOC105196798	non-significant	Non-diff
recombining	lg2	LOC105196799	non-significant	Non-diff
recombining	lg2	LOC105196800	non-significant	Non-diff
recombining	lg2	LOC105196801	non-significant	Non-diff
recombining	lg2	LOC105196802	non-significant	Non-diff
recombining	lg2	LOC105196803	non-significant	Non-diff
recombining	lg2	LOC105196805	non-significant	Non-diff
recombining	lg2	LOC105196806	non-significant	Non-diff
recombining	lg2	LOC105196807	non-significant	Non-diff
recombining	lg2	LOC105196808	non-significant	Non-diff
recombining	lg2	LOC105196809	non-significant	Non-diff
recombining	lg2	LOC105196811	non-significant	Non-diff
recombining	lg2	LOC105196812	non-significant	Non-diff
recombining	lg2	LOC105196813	non-significant	Non-diff
recombining	lg2	LOC105196814	non-significant	Non-diff
recombining	lg2	LOC105196815	non-significant	Non-diff
recombining	lg2	LOC105196816	non-significant	Non-diff
recombining	lg2	LOC105196818	non-significant	Non-diff
recombining	lg2	LOC105196819	non-significant	Non-diff
recombining	lg2	LOC105196820	non-significant	Non-diff
recombining	lg2	LOC105196821	non-significant	Non-diff
recombining	lg2	LOC105196822	non-significant	Non-diff
recombining	lg2	LOC105196823	non-significant	Non-diff
recombining	lg2	LOC105196824	non-significant	Non-diff
recombining	lg2	LOC105196825	non-significant	Non-diff
recombining	lg2	LOC105196826	non-significant	Non-diff
recombining	lg2	LOC105196827	non-significant	Non-diff
recombining	lg2	Trnag-ccc	non-significant	Non-diff
recombining	lg2	Trnag-ucc	non-significant	Non-diff
recombining	lg2	LOC105207556	non-significant	Non-diff
recombining	lg2	LOC105207557	non-significant	Non-diff
recombining	lg2	LOC105207558	non-significant	Non-diff
recombining	lg2	LOC105207559	non-significant	Non-diff
recombining	lg2	LOC105207560	non-significant	Non-diff
recombining	lg2	LOC105207562	non-significant	Non-diff
recombining	lg2	LOC105197368	non-significant	Non-diff
recombining	lg2	LOC105197369	non-significant	Non-diff
recombining	lg2	LOC105197370	non-significant	Non-diff
recombining	lg2	LOC105197371	non-significant	Non-diff
recombining	lg2	LOC105197372	non-significant	Non-diff
recombining	lg2	LOC105197373	non-significant	Non-diff
recombining	lg2	LOC105197375	non-significant	Non-diff
recombining	lg2	LOC105197376	non-significant	Non-diff
recombining	lg2	LOC105197377	non-significant	Non-diff
recombining	lg2	LOC105197378	non-significant	Non-diff
recombining	lg2	LOC105197379	non-significant	Non-diff
recombining	lg2	LOC105197380	non-significant	Non-diff
recombining	lg2	LOC105197381	non-significant	Non-diff
recombining	lg2	LOC105197382	non-significant	Non-diff
recombining	lg2	LOC105197383	non-significant	Non-diff
recombining	lg2	LOC105197384	non-significant	Non-diff
recombining	lg2	LOC105197385	non-significant	Non-diff
recombining	lg2	LOC105197386	non-significant	Non-diff
recombining	lg2	LOC105197387	non-significant	Non-diff
recombining	lg2	LOC105197388	non-significant	Non-diff
recombining	lg2	LOC105197389	non-significant	Non-diff
recombining	lg2	LOC105197391	non-significant	Non-diff
recombining	lg2	LOC105197392	non-significant	Non-diff
recombining	lg2	LOC105197394	non-significant	Non-diff
recombining	lg2	LOC105197395	non-significant	Non-diff
recombining	lg2	LOC105197396	non-significant	Non-diff
recombining	lg2	LOC105197397	non-significant	Non-diff
recombining	lg2	LOC105197398	non-significant	Non-diff
recombining	lg2	LOC105197400	non-significant	Non-diff
recombining	lg2	LOC105197401	non-significant	Non-diff
recombining	lg2	LOC105197402	non-significant	Non-diff
recombining	lg2	LOC105197403	non-significant	Non-diff
recombining	lg2	LOC105197404	non-significant	Non-diff
recombining	lg2	LOC105197405	non-significant	Non-diff
recombining	lg2	LOC105197407	non-significant	Non-diff
recombining	lg2	LOC105197408	non-significant	Non-diff
recombining	lg2	LOC105197409	non-significant	Non-diff
recombining	lg2	LOC105197410	non-significant	Non-diff
recombining	lg2	LOC105197411	non-significant	Non-diff
recombining	lg2	LOC105197413	non-significant	Non-diff
recombining	lg2	LOC105197414	non-significant	Non-diff
recombining	lg2	LOC105197415	non-significant	Non-diff
recombining	lg2	LOC105197416	non-significant	Non-diff
recombining	lg2	LOC105197417	non-significant	Non-diff
recombining	lg2	LOC105197418	non-significant	Non-diff
recombining	lg2	LOC105197419	non-significant	Non-diff
recombining	lg2	LOC105197420	non-significant	Non-diff
recombining	lg2	LOC105197422	non-significant	Non-diff
recombining	lg2	LOC105197423	non-significant	Non-diff
recombining	lg2	LOC105197424	non-significant	Non-diff
recombining	lg2	LOC105197425	non-significant	Non-diff
recombining	lg2	LOC105197426	non-significant	Non-diff
recombining	lg2	LOC105197427	non-significant	Non-diff
recombining	lg2	LOC105197428	non-significant	Non-diff
recombining	lg2	LOC105197429	non-significant	Non-diff
recombining	lg2	LOC105197430	non-significant	Non-diff
recombining	lg2	LOC105197431	non-significant	Non-diff
recombining	lg2	LOC105197432	non-significant	Non-diff
recombining	lg2	LOC105197433	non-significant	Non-diff
recombining	lg2	LOC105197434	non-significant	Non-diff
recombining	lg2	LOC105197435	non-significant	Non-diff
recombining	lg2	LOC105197436	non-significant	Non-diff
recombining	lg2	LOC105197437	non-significant	Non-diff
recombining	lg2	LOC105197439	non-significant	Non-diff
recombining	lg2	LOC105197440	non-significant	Non-diff
recombining	lg2	LOC105197441	non-significant	Non-diff
recombining	lg2	LOC105197442	non-significant	Non-diff
recombining	lg2	LOC105197443	non-significant	Non-diff
recombining	lg2	LOC105197444	non-significant	Non-diff
recombining	lg2	LOC105197446	non-significant	Non-diff
recombining	lg2	LOC105197447	non-significant	Non-diff
recombining	lg2	LOC105197448	non-significant	Non-diff
recombining	lg2	LOC105197449	non-significant	Non-diff
recombining	lg2	LOC105197450	non-significant	Non-diff
recombining	lg2	LOC105197451	non-significant	Non-diff
recombining	lg2	LOC105197452	non-significant	Non-diff
recombining	lg2	LOC105197453	non-significant	Non-diff
recombining	lg2	LOC105197454	non-significant	Non-diff
recombining	lg2	LOC105197455	non-significant	Non-diff
recombining	lg2	LOC105197456	non-significant	Non-diff
recombining	lg2	LOC105197457	non-significant	Non-diff
recombining	lg2	LOC105197458	non-significant	Non-diff
recombining	lg2	LOC105197459	non-significant	Non-diff
recombining	lg2	LOC105197461	non-significant	Non-diff
recombining	lg2	LOC105197462	non-significant	Non-diff
recombining	lg2	LOC105197463	non-significant	Non-diff
recombining	lg2	LOC105197464	non-significant	Non-diff
recombining	lg2	LOC105197465	non-significant	Non-diff
recombining	lg2	LOC105197467	significant	Mono
recombining	lg2	LOC105197468	non-significant	Non-diff
recombining	lg2	LOC105197469	non-significant	Non-diff
recombining	lg2	LOC105197470	non-significant	Non-diff
recombining	lg2	LOC105197471	non-significant	Non-diff
recombining	lg2	LOC105197472	non-significant	Non-diff
recombining	lg2	LOC105197473	non-significant	Non-diff
recombining	lg2	LOC105197474	non-significant	Non-diff
recombining	lg2	LOC105197476	non-significant	Non-diff
recombining	lg2	LOC105197477	non-significant	Non-diff
recombining	lg2	LOC105197478	non-significant	Non-diff
recombining	lg2	LOC105197479	non-significant	Non-diff
recombining	lg2	LOC105197480	non-significant	Non-diff
recombining	lg2	LOC105197481	non-significant	Non-diff
recombining	lg2	LOC105197483	non-significant	Non-diff
recombining	lg2	LOC105197484	non-significant	Non-diff
recombining	lg2	LOC105197485	non-significant	Non-diff
recombining	lg2	LOC105197486	non-significant	Non-diff
recombining	lg2	LOC105197487	non-significant	Non-diff
recombining	lg2	LOC105197489	non-significant	Non-diff
recombining	lg2	LOC105197490	non-significant	Non-diff
recombining	lg2	LOC105197491	non-significant	Non-diff
recombining	lg2	LOC105197492	non-significant	Non-diff
recombining	lg2	LOC105197494	non-significant	Non-diff
recombining	lg2	LOC105197495	non-significant	Non-diff
recombining	lg2	LOC105197496	non-significant	Non-diff
recombining	lg2	LOC105197497	non-significant	Non-diff
recombining	lg2	LOC105197498	non-significant	Non-diff
recombining	lg2	LOC105197499	non-significant	Non-diff
recombining	lg2	LOC105197501	non-significant	Non-diff
recombining	lg2	LOC105197502	non-significant	Non-diff
recombining	lg2	LOC105197503	non-significant	Non-diff
recombining	lg2	LOC105197504	non-significant	Non-diff
recombining	lg2	LOC105197506	non-significant	Non-diff
recombining	lg2	LOC105197507	non-significant	Non-diff
recombining	lg2	LOC105197508	non-significant	Non-diff
recombining	lg2	LOC105197510	non-significant	Non-diff
recombining	lg2	LOC105197511	non-significant	Non-diff
recombining	lg2	LOC105197512	significant	Poly
recombining	lg2	LOC105197513	non-significant	Non-diff
recombining	lg2	LOC105197514	non-significant	Non-diff
recombining	lg2	LOC105197516	non-significant	Non-diff
recombining	lg2	LOC105197517	significant	Poly
recombining	lg2	LOC105197518	non-significant	Non-diff
recombining	lg2	LOC105197519	non-significant	Non-diff
recombining	lg2	LOC105197520	non-significant	Non-diff
recombining	lg2	LOC105197521	non-significant	Non-diff
recombining	lg2	LOC105197522	non-significant	Non-diff
recombining	lg2	LOC105197523	non-significant	Non-diff
recombining	lg2	LOC105197524	non-significant	Non-diff
recombining	lg2	LOC105197525	non-significant	Non-diff
recombining	lg2	LOC105197526	non-significant	Non-diff
recombining	lg2	LOC105197527	non-significant	Non-diff
recombining	lg2	LOC105197528	non-significant	Non-diff
recombining	lg2	LOC105197529	non-significant	Non-diff
recombining	lg2	LOC105197530	non-significant	Non-diff
recombining	lg2	LOC105197531	non-significant	Non-diff
recombining	lg2	LOC105197532	non-significant	Non-diff
recombining	lg2	LOC105197533	non-significant	Non-diff
recombining	lg2	LOC105197534	non-significant	Non-diff
recombining	lg2	LOC105197535	non-significant	Non-diff
recombining	lg2	LOC105197536	non-significant	Non-diff
recombining	lg2	LOC105197537	non-significant	Non-diff
recombining	lg2	LOC105197538	non-significant	Non-diff
recombining	lg2	LOC105197539	non-significant	Non-diff
recombining	lg2	LOC105197540	non-significant	Non-diff
recombining	lg2	LOC105197541	non-significant	Non-diff
recombining	lg2	LOC105197542	non-significant	Non-diff
recombining	lg2	LOC105197543	non-significant	Non-diff
recombining	lg2	LOC105197544	non-significant	Non-diff
recombining	lg2	LOC105197545	non-significant	Non-diff
recombining	lg2	LOC105197546	non-significant	Non-diff
recombining	lg2	LOC105197547	non-significant	Non-diff
recombining	lg2	LOC105197548	non-significant	Non-diff
recombining	lg2	LOC105197549	non-significant	Non-diff
recombining	lg2	LOC105197550	non-significant	Non-diff
recombining	lg2	LOC105197551	non-significant	Non-diff
recombining	lg2	Trnai-uau	non-significant	Non-diff
recombining	lg2	Trnap-ugg	non-significant	Non-diff
recombining	lg2	Trnav-uac	non-significant	Non-diff
recombining	lg2	LOC105194560	non-significant	Non-diff
recombining	lg2	LOC105194561	non-significant	Non-diff
recombining	lg2	LOC105194562	non-significant	Non-diff
recombining	lg2	LOC105194563	non-significant	Non-diff
recombining	lg2	LOC105194564	non-significant	Non-diff
recombining	lg2	LOC105194565	non-significant	Non-diff
recombining	lg2	LOC105194567	non-significant	Non-diff
recombining	lg2	LOC105194568	non-significant	Non-diff
recombining	lg2	LOC105194569	non-significant	Non-diff
recombining	lg2	LOC105194570	non-significant	Non-diff
recombining	lg2	LOC105194571	non-significant	Non-diff
recombining	lg2	LOC105194572	non-significant	Non-diff
recombining	lg2	LOC105194573	non-significant	Non-diff
recombining	lg2	LOC105194574	non-significant	Non-diff
recombining	lg2	LOC105194576	non-significant	Non-diff
recombining	lg2	LOC105194577	non-significant	Non-diff
recombining	lg2	LOC105194578	non-significant	Non-diff
recombining	lg2	LOC105194579	non-significant	Non-diff
recombining	lg2	LOC105194580	non-significant	Non-diff
recombining	lg2	LOC105194581	non-significant	Non-diff
recombining	lg2	LOC105194582	non-significant	Non-diff
recombining	lg2	LOC105194583	non-significant	Non-diff
recombining	lg2	LOC105194584	non-significant	Non-diff
recombining	lg2	LOC105194586	non-significant	Non-diff
recombining	lg2	LOC105194587	non-significant	Non-diff
recombining	lg2	LOC105194588	non-significant	Non-diff
recombining	lg2	LOC105193584	non-significant	Non-diff
recombining	lg2	LOC105193597	non-significant	Non-diff
recombining	lg2	LOC105193607	non-significant	Non-diff
recombining	lg2	LOC105193618	non-significant	Non-diff
recombining	lg2	LOC105193625	non-significant	Non-diff
recombining	lg2	LOC105193634	non-significant	Non-diff
recombining	lg2	LOC105193647	non-significant	Non-diff
recombining	lg2	LOC105193658	non-significant	Non-diff
recombining	lg2	LOC105193675	non-significant	Non-diff
recombining	lg2	LOC105193686	non-significant	Non-diff
recombining	lg2	LOC105193696	non-significant	Non-diff
recombining	lg2	LOC105193703	non-significant	Non-diff
recombining	lg2	LOC105193711	non-significant	Non-diff
recombining	lg2	LOC105193718	non-significant	Non-diff
recombining	lg2	LOC105193729	non-significant	Non-diff
recombining	lg2	LOC105193736	non-significant	Non-diff
recombining	lg2	LOC105193746	non-significant	Non-diff
recombining	lg2	LOC105193756	non-significant	Non-diff
recombining	lg2	LOC105193765	non-significant	Non-diff
recombining	lg2	LOC105193775	significant	Poly
recombining	lg2	LOC105193795	non-significant	Non-diff
recombining	lg2	LOC105193805	non-significant	Non-diff
recombining	lg2	LOC105193813	non-significant	Non-diff
recombining	lg2	LOC105193840	non-significant	Non-diff
recombining	lg2	LOC105193852	non-significant	Non-diff
recombining	lg2	LOC105193867	non-significant	Non-diff
recombining	lg2	LOC105193879	non-significant	Non-diff
recombining	lg2	LOC105193900	non-significant	Non-diff
recombining	lg2	LOC105193906	non-significant	Non-diff
recombining	lg2	LOC105193912	non-significant	Non-diff
recombining	lg2	LOC105193928	non-significant	Non-diff
recombining	lg2	LOC105193939	non-significant	Non-diff
recombining	lg2	LOC105193948	non-significant	Non-diff
recombining	lg2	LOC105193959	non-significant	Non-diff
recombining	lg2	LOC105204410	non-significant	Non-diff
recombining	lg2	LOC105206824	non-significant	Non-diff
recombining	lg2	LOC105206831	non-significant	Non-diff
recombining	lg2	LOC105203311	non-significant	Non-diff
recombining	lg2	LOC105203313	non-significant	Non-diff
recombining	lg2	LOC105203314	non-significant	Non-diff
recombining	lg2	LOC105203315	non-significant	Non-diff
recombining	lg2	LOC105203316	non-significant	Non-diff
recombining	lg2	LOC105200090	non-significant	Non-diff
recombining	lg2	LOC105200091	non-significant	Non-diff
recombining	lg2	LOC105200092	non-significant	Non-diff
recombining	lg2	LOC105204985	non-significant	Non-diff
recombining	lg2	LOC105204986	non-significant	Non-diff
recombining	lg2	LOC105204987	non-significant	Non-diff
recombining	lg2	LOC105204990	non-significant	Non-diff
recombining	lg2	LOC105202478	non-significant	Non-diff
recombining	lg2	LOC105204931	non-significant	Non-diff
recombining	lg2	LOC105201496	non-significant	Non-diff
recombining	lg2	LOC105201497	non-significant	Non-diff
recombining	lg2	LOC105198178	non-significant	Non-diff
recombining	lg2	LOC105198186	non-significant	Non-diff
recombining	lg2	LOC105198197	non-significant	Non-diff
recombining	lg2	LOC105198203	non-significant	Non-diff
recombining	lg2	LOC105198213	non-significant	Non-diff
recombining	lg2	LOC105198222	non-significant	Non-diff
recombining	lg2	LOC105198235	non-significant	Non-diff
recombining	lg2	LOC105198243	non-significant	Non-diff
recombining	lg2	LOC105198253	non-significant	Non-diff
recombining	lg2	LOC105198261	non-significant	Non-diff
recombining	lg2	LOC105198271	non-significant	Non-diff
recombining	lg2	LOC105198281	significant	Poly
recombining	lg2	LOC105198290	significant	Poly
recombining	lg2	LOC105198304	non-significant	Non-diff
recombining	lg2	LOC105198317	non-significant	Non-diff
recombining	lg2	LOC105198322	non-significant	Non-diff
recombining	lg2	LOC105198331	non-significant	Non-diff
recombining	lg2	LOC105198349	non-significant	Non-diff
recombining	lg2	LOC105198360	non-significant	Non-diff
recombining	lg2	LOC105198368	non-significant	Non-diff
recombining	lg2	LOC105198376	non-significant	Non-diff
recombining	lg2	LOC105198395	non-significant	Non-diff
recombining	lg2	LOC105198405	non-significant	Non-diff
recombining	lg2	LOC105198413	non-significant	Non-diff
recombining	lg2	LOC105198426	non-significant	Non-diff
recombining	lg2	LOC105198437	significant	Poly
recombining	lg2	LOC105198448	non-significant	Non-diff
recombining	lg2	LOC105198488	non-significant	Non-diff
recombining	lg2	LOC105198493	non-significant	Non-diff
recombining	lg2	LOC105198508	non-significant	Non-diff
recombining	lg2	LOC105198516	non-significant	Non-diff
recombining	lg2	LOC105198525	non-significant	Non-diff
recombining	lg2	LOC105198536	non-significant	Non-diff
recombining	lg2	LOC105198617	non-significant	Non-diff
recombining	lg2	LOC105198639	non-significant	Non-diff
recombining	lg2	LOC105198645	non-significant	Non-diff
recombining	lg2	LOC105198659	non-significant	Non-diff
recombining	lg2	LOC105198663	non-significant	Non-diff
recombining	lg2	LOC105198711	non-significant	Non-diff
recombining	lg2	LOC105198719	non-significant	Non-diff
recombining	lg2	LOC105198727	non-significant	Non-diff
recombining	lg2	LOC105198736	non-significant	Non-diff
recombining	lg2	LOC105198744	non-significant	Non-diff
recombining	lg2	LOC105198752	non-significant	Non-diff
recombining	lg2	LOC105198761	non-significant	Non-diff
recombining	lg2	LOC105196443	non-significant	Non-diff
recombining	lg2	LOC105196444	non-significant	Non-diff
recombining	lg2	LOC105196445	non-significant	Non-diff
recombining	lg2	LOC105196446	non-significant	Non-diff
recombining	lg2	LOC105196447	non-significant	Non-diff
recombining	lg2	LOC105196448	non-significant	Non-diff
recombining	lg2	LOC105196449	non-significant	Non-diff
recombining	lg2	LOC105196450	non-significant	Non-diff
recombining	lg2	LOC105196451	non-significant	Non-diff
recombining	lg2	LOC105196452	non-significant	Non-diff
recombining	lg2	LOC105196453	non-significant	Non-diff
recombining	lg2	LOC105196456	non-significant	Non-diff
recombining	lg2	LOC105196457	non-significant	Non-diff
recombining	lg2	LOC105196458	significant	Poly
recombining	lg2	LOC105196459	non-significant	Non-diff
recombining	lg2	LOC105196460	non-significant	Non-diff
recombining	lg2	LOC105196461	non-significant	Non-diff
recombining	lg2	LOC105196462	non-significant	Non-diff
recombining	lg2	LOC105196463	non-significant	Non-diff
recombining	lg2	LOC105196464	non-significant	Non-diff
recombining	lg2	LOC105196465	non-significant	Non-diff
recombining	lg2	LOC105196466	non-significant	Non-diff
recombining	lg2	LOC105196467	non-significant	Non-diff
recombining	lg2	LOC105196469	non-significant	Non-diff
recombining	lg2	LOC105196470	non-significant	Non-diff
recombining	lg2	LOC105196471	significant	Poly
recombining	lg2	LOC105196472	non-significant	Non-diff
recombining	lg2	LOC105196473	non-significant	Non-diff
recombining	lg2	LOC105196474	non-significant	Non-diff
recombining	lg2	LOC105196475	non-significant	Non-diff
recombining	lg2	LOC105196476	significant	Poly
recombining	lg2	LOC105196478	non-significant	Non-diff
recombining	lg2	LOC105196479	significant	Poly
recombining	lg2	LOC105196480	non-significant	Non-diff
recombining	lg2	LOC105201562	non-significant	Non-diff
recombining	lg2	LOC105198991	non-significant	Non-diff
recombining	lg2	LOC105198992	non-significant	Non-diff
recombining	lg2	LOC105198993	non-significant	Non-diff
recombining	lg2	LOC105198994	non-significant	Non-diff
recombining	lg2	LOC105198996	non-significant	Non-diff
recombining	lg2	LOC105198997	non-significant	Non-diff
recombining	lg2	LOC105198998	significant	Poly
recombining	lg2	LOC105198999	significant	Poly
recombining	lg2	LOC105199000	non-significant	Non-diff
recombining	lg2	LOC105199001	non-significant	Non-diff
recombining	lg2	LOC105199002	non-significant	Non-diff
recombining	lg2	LOC105199003	non-significant	Non-diff
recombining	lg2	LOC105199004	non-significant	Non-diff
recombining	lg2	LOC105199005	non-significant	Non-diff
recombining	lg2	LOC105199006	non-significant	Non-diff
recombining	lg2	LOC105199007	non-significant	Non-diff
recombining	lg2	LOC105199009	non-significant	Non-diff
recombining	lg2	LOC105199010	non-significant	Non-diff
recombining	lg2	LOC105199011	non-significant	Non-diff
recombining	lg2	LOC105199012	non-significant	Non-diff
recombining	lg2	LOC105199013	non-significant	Non-diff
recombining	lg2	LOC105199015	non-significant	Non-diff
recombining	lg2	LOC105199016	non-significant	Non-diff
recombining	lg2	LOC105199017	non-significant	Non-diff
recombining	lg2	LOC105199018	non-significant	Non-diff
recombining	lg2	LOC105199019	non-significant	Non-diff
recombining	lg2	LOC105199020	non-significant	Non-diff
recombining	lg2	LOC105199021	non-significant	Non-diff
recombining	lg2	LOC105199022	non-significant	Non-diff
recombining	lg2	LOC105199023	non-significant	Non-diff
recombining	lg2	LOC105199024	non-significant	Non-diff
recombining	lg2	LOC105199025	non-significant	Non-diff
recombining	lg2	LOC105199026	non-significant	Non-diff
recombining	lg2	LOC105199027	non-significant	Non-diff
recombining	lg2	LOC105199028	non-significant	Non-diff
recombining	lg2	LOC105199030	non-significant	Non-diff
recombining	lg2	LOC105199031	non-significant	Non-diff
recombining	lg2	LOC105199032	non-significant	Non-diff
recombining	lg2	LOC105199033	non-significant	Non-diff
recombining	lg2	LOC105199034	non-significant	Non-diff
recombining	lg2	LOC105199035	non-significant	Non-diff
recombining	lg2	LOC105199036	non-significant	Non-diff
recombining	lg2	LOC105199037	non-significant	Non-diff
recombining	lg2	LOC105199038	non-significant	Non-diff
recombining	lg2	LOC105199039	non-significant	Non-diff
recombining	lg2	LOC105199040	non-significant	Non-diff
recombining	lg2	LOC105199041	non-significant	Non-diff
recombining	lg2	LOC105199042	non-significant	Non-diff
recombining	lg2	LOC105199043	non-significant	Non-diff
recombining	lg2	LOC105199044	non-significant	Non-diff
recombining	lg2	LOC105199045	non-significant	Non-diff
recombining	lg2	LOC105199046	significant	Poly
recombining	lg2	LOC105199047	non-significant	Non-diff
recombining	lg2	LOC105199048	non-significant	Non-diff
recombining	lg2	LOC105199049	non-significant	Non-diff
recombining	lg2	LOC105199050	non-significant	Non-diff
recombining	lg2	LOC105199051	non-significant	Non-diff
recombining	lg2	LOC105199052	non-significant	Non-diff
recombining	lg2	LOC105199053	non-significant	Non-diff
recombining	lg2	LOC105199054	non-significant	Non-diff
recombining	lg2	LOC105199055	non-significant	Non-diff
recombining	lg2	LOC105199056	non-significant	Non-diff
recombining	lg2	LOC105199057	non-significant	Non-diff
recombining	lg2	LOC105199058	non-significant	Non-diff
recombining	lg2	LOC105199059	non-significant	Non-diff
recombining	lg2	LOC105199060	non-significant	Non-diff
recombining	lg2	LOC105199061	non-significant	Non-diff
recombining	lg2	LOC105199062	non-significant	Non-diff
recombining	lg2	LOC105199063	non-significant	Non-diff
recombining	lg2	LOC105199064	non-significant	Non-diff
recombining	lg2	LOC105199065	non-significant	Non-diff
recombining	lg2	LOC105199066	non-significant	Non-diff
recombining	lg2	LOC105199067	non-significant	Non-diff
recombining	lg2	LOC105199068	non-significant	Non-diff
recombining	lg2	LOC105199069	non-significant	Non-diff
recombining	lg2	LOC105199070	non-significant	Non-diff
recombining	lg2	LOC105199071	non-significant	Non-diff
recombining	lg2	LOC105199072	non-significant	Non-diff
recombining	lg2	LOC105199073	non-significant	Non-diff
recombining	lg2	LOC105199074	non-significant	Non-diff
recombining	lg2	LOC105199075	non-significant	Non-diff
recombining	lg2	LOC105199076	non-significant	Non-diff
recombining	lg2	LOC105199077	non-significant	Non-diff
recombining	lg2	LOC105199078	non-significant	Non-diff
recombining	lg2	LOC105199080	non-significant	Non-diff
recombining	lg2	LOC105199081	non-significant	Non-diff
recombining	lg2	LOC105199082	non-significant	Non-diff
recombining	lg2	LOC105199083	non-significant	Non-diff
recombining	lg2	LOC105199084	non-significant	Non-diff
recombining	lg2	LOC105199085	non-significant	Non-diff
recombining	lg2	LOC105199086	non-significant	Non-diff
recombining	lg2	LOC105199087	non-significant	Non-diff
recombining	lg2	LOC105199088	non-significant	Non-diff
recombining	lg2	LOC105199090	non-significant	Non-diff
recombining	lg2	LOC105199091	non-significant	Non-diff
recombining	lg2	LOC105199092	non-significant	Non-diff
recombining	lg2	LOC105199093	non-significant	Non-diff
recombining	lg2	LOC105199094	non-significant	Non-diff
recombining	lg2	LOC105199095	non-significant	Non-diff
recombining	lg2	LOC105199096	non-significant	Non-diff
recombining	lg2	LOC105199098	non-significant	Non-diff
recombining	lg2	LOC105199099	non-significant	Non-diff
recombining	lg2	LOC105199102	non-significant	Non-diff
recombining	lg2	LOC105199103	non-significant	Non-diff
recombining	lg2	LOC105199104	non-significant	Non-diff
recombining	lg2	LOC105199105	non-significant	Non-diff
recombining	lg2	LOC105199106	non-significant	Non-diff
recombining	lg2	LOC105199107	non-significant	Non-diff
recombining	lg2	LOC105199108	non-significant	Non-diff
recombining	lg2	LOC105199109	non-significant	Non-diff
recombining	lg2	LOC105199110	non-significant	Non-diff
recombining	lg2	LOC105199112	non-significant	Non-diff
recombining	lg2	LOC105199113	non-significant	Non-diff
recombining	lg2	LOC105199114	significant	Poly
recombining	lg2	LOC105199115	non-significant	Non-diff
recombining	lg2	LOC105199116	non-significant	Non-diff
recombining	lg2	LOC105199117	non-significant	Non-diff
recombining	lg2	LOC105199118	non-significant	Non-diff
recombining	lg2	LOC105199119	non-significant	Non-diff
recombining	lg2	LOC105199120	non-significant	Non-diff
recombining	lg2	LOC105199122	non-significant	Non-diff
recombining	lg2	LOC105199123	non-significant	Non-diff
recombining	lg2	LOC105199124	non-significant	Non-diff
recombining	lg2	LOC105199125	non-significant	Non-diff
recombining	lg2	LOC105199126	non-significant	Non-diff
recombining	lg2	LOC105199127	non-significant	Non-diff
recombining	lg2	LOC105199128	non-significant	Non-diff
recombining	lg2	LOC105199129	non-significant	Non-diff
recombining	lg2	LOC105199130	non-significant	Non-diff
recombining	lg2	LOC105199131	non-significant	Non-diff
recombining	lg2	LOC105199133	non-significant	Non-diff
recombining	lg2	LOC105199134	significant	Poly
recombining	lg2	LOC105199135	non-significant	Non-diff
recombining	lg2	LOC105199136	non-significant	Non-diff
recombining	lg2	LOC105199137	non-significant	Non-diff
recombining	lg2	LOC105199138	non-significant	Non-diff
recombining	lg2	LOC105199139	non-significant	Non-diff
recombining	lg2	LOC105199140	non-significant	Non-diff
recombining	lg2	LOC105199141	non-significant	Non-diff
recombining	lg2	LOC105199142	non-significant	Non-diff
recombining	lg2	LOC105199143	non-significant	Non-diff
recombining	lg2	LOC105199144	non-significant	Non-diff
recombining	lg2	LOC105199145	non-significant	Non-diff
recombining	lg2	LOC105199146	non-significant	Non-diff
recombining	lg2	LOC105199147	non-significant	Non-diff
recombining	lg2	LOC105199148	non-significant	Non-diff
recombining	lg2	LOC105199149	non-significant	Non-diff
recombining	lg2	LOC105199150	non-significant	Non-diff
recombining	lg2	LOC105199151	non-significant	Non-diff
recombining	lg2	LOC105199152	non-significant	Non-diff
recombining	lg2	LOC105199153	non-significant	Non-diff
recombining	lg2	LOC105199154	non-significant	Non-diff
recombining	lg2	LOC105200708	non-significant	Non-diff
recombining	lg2	LOC105200710	non-significant	Non-diff
recombining	lg2	LOC105200711	non-significant	Non-diff
recombining	lg2	LOC105200712	non-significant	Non-diff
recombining	lg2	LOC105200713	non-significant	Non-diff
recombining	lg2	LOC105200714	non-significant	Non-diff
recombining	lg2	LOC105200716	non-significant	Non-diff
recombining	lg2	LOC105200717	non-significant	Non-diff
recombining	lg2	LOC105200718	non-significant	Non-diff
recombining	lg2	LOC105200719	non-significant	Non-diff
recombining	lg2	LOC105200720	non-significant	Non-diff
recombining	lg2	LOC105200721	non-significant	Non-diff
recombining	lg2	LOC105200722	non-significant	Non-diff
recombining	lg2	LOC105200724	non-significant	Non-diff
recombining	lg2	LOC105200725	non-significant	Non-diff
recombining	lg2	LOC105200726	non-significant	Non-diff
recombining	lg2	LOC105200728	non-significant	Non-diff
recombining	lg2	LOC105200729	non-significant	Non-diff
recombining	lg2	LOC105200730	non-significant	Non-diff
recombining	lg2	LOC105200731	non-significant	Non-diff
recombining	lg2	LOC105200732	non-significant	Non-diff
recombining	lg2	LOC105200733	non-significant	Non-diff
recombining	lg2	LOC105200734	non-significant	Non-diff
recombining	lg2	LOC105200736	non-significant	Non-diff
recombining	lg2	LOC105200737	non-significant	Non-diff
recombining	lg2	LOC105200738	non-significant	Non-diff
recombining	lg2	LOC105200739	non-significant	Non-diff
recombining	lg2	LOC105200740	non-significant	Non-diff
recombining	lg2	LOC105200741	non-significant	Non-diff
recombining	lg2	LOC105200742	non-significant	Non-diff
recombining	lg2	LOC105200743	non-significant	Non-diff
recombining	lg2	LOC105200745	non-significant	Non-diff
recombining	lg2	LOC105200746	significant	Poly
recombining	lg2	LOC105200747	non-significant	Non-diff
recombining	lg2	LOC105200748	non-significant	Non-diff
recombining	lg2	LOC105200750	non-significant	Non-diff
recombining	lg2	LOC105200751	non-significant	Non-diff
recombining	lg2	LOC105200752	non-significant	Non-diff
recombining	lg2	LOC105200753	non-significant	Non-diff
recombining	lg2	LOC105200754	non-significant	Non-diff
recombining	lg2	LOC105200755	non-significant	Non-diff
recombining	lg2	LOC105200757	non-significant	Non-diff
recombining	lg2	LOC105200758	non-significant	Non-diff
recombining	lg2	LOC105200759	non-significant	Non-diff
recombining	lg2	LOC105200760	non-significant	Non-diff
recombining	lg2	LOC105200761	non-significant	Non-diff
recombining	lg2	LOC105200762	non-significant	Non-diff
recombining	lg2	LOC105200763	non-significant	Non-diff
recombining	lg2	LOC105200764	non-significant	Non-diff
recombining	lg2	LOC105200765	non-significant	Non-diff
recombining	lg2	LOC105200766	non-significant	Non-diff
recombining	lg2	LOC105200767	non-significant	Non-diff
recombining	lg2	LOC105200769	non-significant	Non-diff
recombining	lg2	LOC105200770	non-significant	Non-diff
recombining	lg2	LOC105200772	non-significant	Non-diff
recombining	lg2	LOC105200773	non-significant	Non-diff
recombining	lg2	LOC105200774	non-significant	Non-diff
recombining	lg2	LOC105200775	non-significant	Non-diff
recombining	lg2	LOC105200776	non-significant	Non-diff
recombining	lg2	LOC105200778	non-significant	Non-diff
recombining	lg2	LOC105200779	non-significant	Non-diff
recombining	lg2	LOC105200780	significant	Poly
recombining	lg2	LOC105200781	non-significant	Non-diff
recombining	lg2	LOC105200782	non-significant	Non-diff
recombining	lg2	LOC105200783	non-significant	Non-diff
recombining	lg2	LOC105200784	significant	Poly
recombining	lg2	LOC105200786	non-significant	Non-diff
recombining	lg2	LOC105200787	non-significant	Non-diff
recombining	lg2	LOC105200788	non-significant	Non-diff
recombining	lg2	LOC105200789	non-significant	Non-diff
recombining	lg2	LOC105200790	non-significant	Non-diff
recombining	lg2	LOC105200791	non-significant	Non-diff
recombining	lg2	LOC105200792	non-significant	Non-diff
recombining	lg2	LOC105200793	non-significant	Non-diff
recombining	lg2	LOC105200794	non-significant	Non-diff
recombining	lg2	LOC105200795	non-significant	Non-diff
recombining	lg2	LOC105200796	non-significant	Non-diff
recombining	lg2	LOC105200797	non-significant	Non-diff
recombining	lg2	LOC105200798	non-significant	Non-diff
recombining	lg2	LOC105200799	non-significant	Non-diff
recombining	lg2	LOC105200800	non-significant	Non-diff
recombining	lg2	LOC105200802	non-significant	Non-diff
recombining	lg2	LOC105200803	non-significant	Non-diff
recombining	lg2	LOC105200804	non-significant	Non-diff
recombining	lg2	LOC105200805	non-significant	Non-diff
recombining	lg2	LOC105200806	non-significant	Non-diff
recombining	lg2	LOC105200807	non-significant	Non-diff
recombining	lg2	LOC105200809	non-significant	Non-diff
recombining	lg2	LOC105200810	non-significant	Non-diff
recombining	lg2	LOC105200811	non-significant	Non-diff
recombining	lg2	LOC105200812	non-significant	Non-diff
recombining	lg2	LOC105200813	non-significant	Non-diff
recombining	lg2	LOC105200814	non-significant	Non-diff
recombining	lg2	LOC105200816	significant	Poly
recombining	lg2	LOC105200817	non-significant	Non-diff
recombining	lg2	LOC105200818	non-significant	Non-diff
recombining	lg2	LOC105200819	non-significant	Non-diff
recombining	lg2	LOC105200820	non-significant	Non-diff
recombining	lg2	LOC105200821	non-significant	Non-diff
recombining	lg2	LOC105200822	non-significant	Non-diff
recombining	lg2	LOC105200824	non-significant	Non-diff
recombining	lg2	LOC105200825	non-significant	Non-diff
recombining	lg2	LOC105200826	non-significant	Non-diff
recombining	lg2	LOC105200827	non-significant	Non-diff
recombining	lg2	LOC105200829	non-significant	Non-diff
recombining	lg2	LOC105200830	non-significant	Non-diff
recombining	lg2	LOC105200831	non-significant	Non-diff
recombining	lg2	LOC105200832	non-significant	Non-diff
recombining	lg2	LOC105200833	non-significant	Non-diff
recombining	lg2	LOC105200834	non-significant	Non-diff
recombining	lg2	LOC105200836	non-significant	Non-diff
recombining	lg2	LOC105200837	significant	Poly
recombining	lg2	LOC105200838	non-significant	Non-diff
recombining	lg2	LOC105200839	non-significant	Non-diff
recombining	lg2	LOC105200840	non-significant	Non-diff
recombining	lg2	LOC105200841	non-significant	Non-diff
recombining	lg2	LOC105200842	non-significant	Non-diff
recombining	lg2	LOC105200844	non-significant	Non-diff
recombining	lg2	LOC105200845	non-significant	Non-diff
recombining	lg2	LOC105200846	non-significant	Non-diff
recombining	lg2	LOC105200847	non-significant	Non-diff
recombining	lg2	LOC105200848	non-significant	Non-diff
recombining	lg2	LOC105200850	non-significant	Non-diff
recombining	lg2	LOC105200851	non-significant	Non-diff
recombining	lg2	LOC105200852	non-significant	Non-diff
recombining	lg2	LOC105200853	non-significant	Non-diff
recombining	lg2	LOC105200854	non-significant	Non-diff
recombining	lg2	LOC105200855	non-significant	Non-diff
recombining	lg2	LOC105200856	non-significant	Non-diff
recombining	lg2	LOC105200858	non-significant	Non-diff
recombining	lg2	LOC105200859	non-significant	Non-diff
recombining	lg2	LOC105200860	non-significant	Non-diff
recombining	lg2	LOC105200861	non-significant	Non-diff
recombining	lg2	LOC105200862	non-significant	Non-diff
recombining	lg2	LOC105200912	non-significant	Non-diff
recombining	lg2	LOC105200913	non-significant	Non-diff
recombining	lg2	LOC105200914	non-significant	Non-diff
recombining	lg2	LOC105200915	non-significant	Non-diff
recombining	lg2	LOC105200916	non-significant	Non-diff
recombining	lg2	LOC105200917	non-significant	Non-diff
recombining	lg2	LOC105200918	non-significant	Non-diff
recombining	lg2	LOC105200919	non-significant	Non-diff
recombining	lg2	LOC105200920	non-significant	Non-diff
recombining	lg2	LOC105200922	non-significant	Non-diff
recombining	lg2	LOC105200923	non-significant	Non-diff
recombining	lg2	LOC105200924	non-significant	Non-diff
recombining	lg2	LOC105200925	non-significant	Non-diff
recombining	lg2	LOC105200926	non-significant	Non-diff
recombining	lg2	LOC105200927	non-significant	Non-diff
recombining	lg2	LOC105200928	non-significant	Non-diff
recombining	lg2	LOC105200929	non-significant	Non-diff
recombining	lg2	LOC105200930	non-significant	Non-diff
recombining	lg2	LOC105200932	non-significant	Non-diff
recombining	lg2	LOC105200933	non-significant	Non-diff
recombining	lg2	LOC105200934	non-significant	Non-diff
recombining	lg2	LOC105200935	non-significant	Non-diff
recombining	lg2	LOC105200936	non-significant	Non-diff
recombining	lg2	LOC105200937	non-significant	Non-diff
recombining	lg2	LOC105200938	non-significant	Non-diff
recombining	lg2	LOC105200939	non-significant	Non-diff
recombining	lg2	LOC105200940	non-significant	Non-diff
recombining	lg2	LOC105200941	non-significant	Non-diff
recombining	lg2	LOC105200942	non-significant	Non-diff
recombining	lg2	LOC105200943	non-significant	Non-diff
recombining	lg2	LOC105200944	non-significant	Non-diff
recombining	lg2	LOC105200945	non-significant	Non-diff
recombining	lg2	LOC105200946	non-significant	Non-diff
recombining	lg2	LOC105200947	non-significant	Non-diff
recombining	lg2	LOC105200948	non-significant	Non-diff
recombining	lg2	Trnar-acg	non-significant	Non-diff
recombining	lg2	LOC105193761	non-significant	Non-diff
recombining	lg2	LOC105193762	non-significant	Non-diff
recombining	lg2	LOC105193763	non-significant	Non-diff
recombining	lg2	LOC105193764	non-significant	Non-diff
recombining	lg2	LOC105193766	non-significant	Non-diff
recombining	lg2	LOC105193767	non-significant	Non-diff
recombining	lg3	LOC105197332	non-significant	Non-diff
recombining	lg3	LOC105192962	non-significant	Non-diff
recombining	lg3	LOC105192963	non-significant	Non-diff
recombining	lg3	LOC105192964	non-significant	Non-diff
recombining	lg3	LOC105192965	non-significant	Non-diff
recombining	lg3	LOC105192966	non-significant	Non-diff
recombining	lg3	LOC105192967	non-significant	Non-diff
recombining	lg3	LOC105192968	non-significant	Non-diff
recombining	lg3	LOC105192970	non-significant	Non-diff
recombining	lg3	LOC105192971	non-significant	Non-diff
recombining	lg3	LOC105192972	non-significant	Non-diff
recombining	lg3	LOC105192974	non-significant	Non-diff
recombining	lg3	LOC105192975	non-significant	Non-diff
recombining	lg3	LOC105192976	non-significant	Non-diff
recombining	lg3	LOC105192977	non-significant	Non-diff
recombining	lg3	LOC105192978	non-significant	Non-diff
recombining	lg3	LOC105192979	non-significant	Non-diff
recombining	lg3	LOC105192980	non-significant	Non-diff
recombining	lg3	LOC105192982	non-significant	Non-diff
recombining	lg3	LOC105192983	non-significant	Non-diff
recombining	lg3	LOC105192984	non-significant	Non-diff
recombining	lg3	LOC105192985	non-significant	Non-diff
recombining	lg3	LOC105192986	non-significant	Non-diff
recombining	lg3	LOC105192987	non-significant	Non-diff
recombining	lg3	LOC105192989	non-significant	Non-diff
recombining	lg3	LOC105192990	non-significant	Non-diff
recombining	lg3	LOC105192991	non-significant	Non-diff
recombining	lg3	LOC105192992	non-significant	Non-diff
recombining	lg3	LOC105192993	non-significant	Non-diff
recombining	lg3	LOC105192994	non-significant	Non-diff
recombining	lg3	LOC105192995	non-significant	Non-diff
recombining	lg3	LOC105192997	non-significant	Non-diff
recombining	lg3	LOC105192998	non-significant	Non-diff
recombining	lg3	LOC105192999	non-significant	Non-diff
recombining	lg3	LOC105193001	non-significant	Non-diff
recombining	lg3	LOC105193002	non-significant	Non-diff
recombining	lg3	LOC105193003	non-significant	Non-diff
recombining	lg3	LOC105193004	non-significant	Non-diff
recombining	lg3	LOC105193005	non-significant	Non-diff
recombining	lg3	LOC105193006	non-significant	Non-diff
recombining	lg3	LOC105193008	non-significant	Non-diff
recombining	lg3	LOC105193009	non-significant	Non-diff
recombining	lg3	LOC105193010	non-significant	Non-diff
recombining	lg3	LOC105193011	non-significant	Non-diff
recombining	lg3	LOC105193012	non-significant	Non-diff
recombining	lg3	LOC105193013	non-significant	Non-diff
recombining	lg3	LOC105193014	non-significant	Non-diff
recombining	lg3	LOC105193015	non-significant	Non-diff
recombining	lg3	LOC105193017	non-significant	Non-diff
recombining	lg3	LOC105193018	non-significant	Non-diff
recombining	lg3	LOC105193019	non-significant	Non-diff
recombining	lg3	LOC105193020	non-significant	Non-diff
recombining	lg3	Trnag-gcc	non-significant	Non-diff
recombining	lg3	LOC105208230	non-significant	Non-diff
recombining	lg3	LOC105208231	non-significant	Non-diff
recombining	lg3	LOC105208232	non-significant	Non-diff
recombining	lg3	LOC105208233	non-significant	Non-diff
recombining	lg3	LOC105208234	non-significant	Non-diff
recombining	lg3	LOC105208235	non-significant	Non-diff
recombining	lg3	LOC105208237	non-significant	Non-diff
recombining	lg3	LOC105208238	non-significant	Non-diff
recombining	lg3	LOC105208239	non-significant	Non-diff
recombining	lg3	LOC105208240	non-significant	Non-diff
recombining	lg3	LOC105208241	non-significant	Non-diff
recombining	lg3	LOC105208242	non-significant	Non-diff
recombining	lg3	LOC105208243	non-significant	Non-diff
recombining	lg3	LOC105196266	non-significant	Non-diff
recombining	lg3	LOC105193620	non-significant	Non-diff
recombining	lg3	LOC105193621	significant	Poly
recombining	lg3	LOC105193622	non-significant	Non-diff
recombining	lg3	LOC105193623	non-significant	Non-diff
recombining	lg3	LOC105193624	non-significant	Non-diff
recombining	lg3	LOC105202563	non-significant	Non-diff
recombining	lg3	LOC105207504	non-significant	Non-diff
recombining	lg3	LOC105207505	non-significant	Non-diff
recombining	lg3	LOC105207506	non-significant	Non-diff
recombining	lg3	LOC105207507	non-significant	Non-diff
recombining	lg3	LOC105199555	non-significant	Non-diff
recombining	lg3	LOC105199556	non-significant	Non-diff
recombining	lg3	LOC105199557	non-significant	Non-diff
recombining	lg3	LOC105205138	non-significant	Non-diff
recombining	lg3	LOC105205139	significant	Poly
recombining	lg3	LOC105205140	non-significant	Non-diff
recombining	lg3	LOC105205141	non-significant	Non-diff
recombining	lg3	LOC105205142	non-significant	Non-diff
recombining	lg3	LOC105203523	non-significant	Non-diff
recombining	lg3	LOC105203524	non-significant	Non-diff
recombining	lg3	LOC105204390	non-significant	Non-diff
recombining	lg3	LOC105208171	non-significant	Non-diff
recombining	lg3	LOC105208172	non-significant	Non-diff
recombining	lg3	LOC105208173	non-significant	Non-diff
recombining	lg3	LOC105208174	non-significant	Non-diff
recombining	lg3	LOC105208175	non-significant	Non-diff
recombining	lg3	LOC105208176	non-significant	Non-diff
recombining	lg3	LOC105204384	non-significant	Non-diff
recombining	lg3	LOC105202866	non-significant	Non-diff
recombining	lg3	LOC105202867	non-significant	Non-diff
recombining	lg3	LOC105202868	non-significant	Non-diff
recombining	lg3	LOC105202869	non-significant	Non-diff
recombining	lg3	LOC105202870	non-significant	Non-diff
recombining	lg3	LOC105202872	non-significant	Non-diff
recombining	lg3	LOC105202873	non-significant	Non-diff
recombining	lg3	LOC105199771	non-significant	Non-diff
recombining	lg3	LOC105199772	non-significant	Non-diff
recombining	lg3	LOC105199773	non-significant	Non-diff
recombining	lg3	LOC105199774	non-significant	Non-diff
recombining	lg3	LOC105199775	non-significant	Non-diff
recombining	lg3	LOC105199776	non-significant	Non-diff
recombining	lg3	LOC105202918	non-significant	Non-diff
recombining	lg3	LOC105202919	non-significant	Non-diff
recombining	lg3	LOC105202920	non-significant	Non-diff
recombining	lg3	LOC105202921	non-significant	Non-diff
recombining	lg3	LOC105201302	non-significant	Non-diff
recombining	lg3	LOC105201303	non-significant	Non-diff
recombining	lg3	LOC105203173	non-significant	Non-diff
recombining	lg3	LOC105198608	non-significant	Non-diff
recombining	lg3	LOC105198609	non-significant	Non-diff
recombining	lg3	LOC105198610	non-significant	Non-diff
recombining	lg3	LOC105202989	non-significant	Non-diff
recombining	lg3	LOC105202990	non-significant	Non-diff
recombining	lg3	LOC105202991	non-significant	Non-diff
recombining	lg3	LOC105196481	non-significant	Non-diff
recombining	lg3	LOC105196482	non-significant	Non-diff
recombining	lg3	LOC105196483	non-significant	Non-diff
recombining	lg3	LOC105196484	non-significant	Non-diff
recombining	lg3	LOC105196485	non-significant	Non-diff
recombining	lg3	LOC105196486	non-significant	Non-diff
recombining	lg3	LOC105196487	non-significant	Non-diff
recombining	lg3	LOC105196488	non-significant	Non-diff
recombining	lg3	LOC105196489	non-significant	Non-diff
recombining	lg3	LOC105202760	non-significant	Non-diff
recombining	lg3	LOC105202761	non-significant	Non-diff
recombining	lg3	LOC105202762	non-significant	Non-diff
recombining	lg3	LOC105202763	non-significant	Non-diff
recombining	lg3	LOC105202764	non-significant	Non-diff
recombining	lg3	LOC105202765	significant	Poly
recombining	lg3	LOC105202766	non-significant	Non-diff
recombining	lg3	LOC105202767	non-significant	Non-diff
recombining	lg3	LOC105202769	non-significant	Non-diff
recombining	lg3	LOC105202770	non-significant	Non-diff
recombining	lg3	LOC105202771	non-significant	Non-diff
recombining	lg3	LOC105202772	non-significant	Non-diff
recombining	lg3	LOC105202773	non-significant	Non-diff
recombining	lg3	LOC105202774	non-significant	Non-diff
recombining	lg3	LOC105202775	non-significant	Non-diff
recombining	lg3	LOC105202776	non-significant	Non-diff
recombining	lg3	LOC105202778	non-significant	Non-diff
recombining	lg3	LOC105202779	non-significant	Non-diff
recombining	lg3	LOC105202780	non-significant	Non-diff
recombining	lg3	LOC105202781	non-significant	Non-diff
recombining	lg3	LOC105202782	non-significant	Non-diff
recombining	lg3	LOC105202784	non-significant	Non-diff
recombining	lg3	LOC105202785	non-significant	Non-diff
recombining	lg3	LOC105202786	non-significant	Non-diff
recombining	lg3	LOC105202787	non-significant	Non-diff
recombining	lg3	LOC105202788	non-significant	Non-diff
recombining	lg3	LOC105202790	non-significant	Non-diff
recombining	lg3	LOC105202791	non-significant	Non-diff
recombining	lg3	LOC105202792	non-significant	Non-diff
recombining	lg3	LOC105202793	non-significant	Non-diff
recombining	lg3	LOC105202794	non-significant	Non-diff
recombining	lg3	LOC105202795	non-significant	Non-diff
recombining	lg3	LOC105193026	non-significant	Non-diff
recombining	lg3	LOC105193027	non-significant	Non-diff
recombining	lg3	LOC105193028	non-significant	Non-diff
recombining	lg3	LOC105193029	non-significant	Non-diff
recombining	lg3	LOC105193030	non-significant	Non-diff
recombining	lg3	LOC105193031	non-significant	Non-diff
recombining	lg3	LOC105193032	non-significant	Non-diff
recombining	lg3	LOC105193033	non-significant	Non-diff
recombining	lg3	LOC105193035	non-significant	Non-diff
recombining	lg3	LOC105193036	non-significant	Non-diff
recombining	lg3	LOC105193037	non-significant	Non-diff
recombining	lg3	LOC105193038	non-significant	Non-diff
recombining	lg3	LOC105193039	non-significant	Non-diff
recombining	lg3	LOC105193040	non-significant	Non-diff
recombining	lg3	LOC105193041	non-significant	Non-diff
recombining	lg3	LOC105193042	non-significant	Non-diff
recombining	lg3	LOC105193044	non-significant	Non-diff
recombining	lg3	LOC105193045	non-significant	Non-diff
recombining	lg3	LOC105193046	non-significant	Non-diff
recombining	lg3	LOC105193047	non-significant	Non-diff
recombining	lg3	LOC105193048	non-significant	Non-diff
recombining	lg3	LOC105193049	non-significant	Non-diff
recombining	lg3	LOC105193050	non-significant	Non-diff
recombining	lg3	LOC105193051	non-significant	Non-diff
recombining	lg3	LOC105193052	non-significant	Non-diff
recombining	lg3	LOC105193054	non-significant	Non-diff
recombining	lg3	LOC105193055	non-significant	Non-diff
recombining	lg3	LOC105193056	non-significant	Non-diff
[truncated: 8,482 more rows]
