# Supplementary material for: Genomic architecture and evolutionary antagonism drive allelic expression bias in the social supergene of red fire ants
Source: eLife journal article supplement (doi:10.7554/elife.55862), 2020-08-10
Supplement: supp [file elife-55862-supp-v1.zip › elife_poa_e55862_Figure_3_figure_supplement_1_source_data_1.csv]

expression_group	Sb-SB_expression_category	median_expression	confidence_level	lower_median_ci	upper_median_ci
Mono	>1.5	54	0.351	0.95	0.133
Mono	0-0.5	51	0.444	0.95	0.211
Mono	0.5-0.75	66	0.869	0.95	0.571
Mono	0.75-1	198	1.32	0.95	1.13
Mono	1-1.5	228	1.06	0.95	0.863
Poly	>1.5	36	0.901	0.95	0.403
Poly	0-0.5	34	0.394	0.95	0.217
Poly	0.5-0.75	44	0.866	0.95	0.465
Poly	0.75-1	132	1.28	0.95	1.02
Poly	1-1.5	152	0.962	0.95	0.821
PolySb	>1.5	108	0.75	0.95	0.625
PolySb	0-0.5	102	0.125	0.95	0.125
PolySb	0.5-0.75	132	0.75	0.95	0.625
PolySb	0.75-1	396	1	0.95	0.875
PolySb	1-1.5	456	1.5	0.95	1.25
PolySB	>1.5	108	0.25	0.95	0.25
PolySB	0-0.5	102	0.75	0.95	0.562
PolySB	0.5-0.75	132	1.12	0.95	1
PolySB	0.75-1	396	1.12	0.95	1
PolySB	1-1.5	456	1.25	0.95	1.12
