# Supplementary material for: Genomic architecture and evolutionary antagonism drive allelic expression bias in the social supergene of red fire ants
Source: eLife journal article supplement (doi:10.7554/elife.55862), 2020-08-10
Supplement: supp [file elife-55862-supp-v1.zip › elife_poa_e55862_Figure_3_source_data_1.csv]

gene	lfcs_ase	lfcs_social_form	mean_reads_ase	mean_reads_social_form
LOC105193112	-0.140061373628487	0.645175515071867	15.0833333333333	317.021672731583
LOC105193113	-0.133538306274644	0.280559574560427	31.5833333333333	1490.99862544443
LOC105193114	-0.127702496524215	-1.06516459376733	21.8333333333333	393.346723731526
LOC105193116	0.156418536530711	-0.039097523556512	2.5	650.348288376724
LOC105193117	-0.125818833556021	-0.219960623694107	9.08333333333333	259.633912444892
LOC105193118	0.0648115732753701	-0.185570612805207	8.16666666666667	702.561301685696
LOC105193119	0.601558339100008	-1.77084343905423	4.16666666666667	54.6367890874095
LOC105193120	0.707926190079685	-0.988917108542322	4.33333333333333	6541.98727972156
LOC105193121	0.287209698577523	0.368949793352081	1	34.9333245514073
LOC105193122	-0.231234778569436	0.593116374581083	2.5	336.680685462178
LOC105193123	0.394138156986647	0.118741245033087	3	43.4133936910706
LOC105193124	-0.00392941998972039	0.0273652811356341	11.8333333333333	520.003341823357
LOC105193129	-0.534878085986977	1.37959573022016	4.16666666666667	42.3342944914842
LOC105193130	2.37252905041177	0.905300545810567	1.41666666666667	70.5614574920047
LOC105193131	0.271191377330941	-0.820206909314706	13.5	23.2494082819959
LOC105193132	-0.652298996634131	-1.16471906801621	11.75	1244.44808773061
LOC105193134	1.30003527423205	0.224416483778446	14.5833333333333	1231.56557735616
LOC105193135	-0.996187609156658	1.32815824428576	7.25	231.963217498508
LOC105193137	1.00314936394786	-1.10971093981109	2.58333333333333	551.506262734094
LOC105193138	2.4362425954631	-0.329803557508224	1.83333333333333	22.7358539468729
LOC105193145	-0.0255279772337348	0.927665769149688	16.8333333333333	762.167380899133
LOC105193214	-0.0650948209293721	-0.766286562722564	18.5833333333333	3048.87795804279
LOC105193215	0.0181819853911021	-1.01867365061694	2.66666666666667	428.175140776707
LOC105193217	0.17452252776653	1.12620235403205	3.41666666666667	169.290686894508
LOC105193218	-0.0700466686313521	0.75192902123833	7.08333333333333	99.212132653468
LOC105193219	-0.407729441292919	0.455480077862122	14.5833333333333	4475.64433738456
LOC105193220	-0.164678909736233	1.3670555128144	33.75	6684.04381844877
LOC105193222	0.054269330851639	0.766046539646522	1.5	154.411042118889
LOC105193223	-0.172913199905801	0.15735861140838	7.66666666666667	176.155488253945
LOC105193224	0.0322677749059417	-0.33154898852024	5.25	87.8443092973619
LOC105193227	0.386238686657406	0.33164765860912	0.833333333333333	12.0918365566212
LOC105193228	0.401435062951102	0.21883989379391	6.83333333333333	728.949665862346
LOC105193229	-0.101494978963964	-0.123964816423125	9	190.770030524915
LOC105193230	-0.178487492873456	-0.0782670904410308	9.41666666666667	207.812027420715
LOC105193231	0.328714303487738	-0.370991975872813	10.25	336.524973956371
LOC105193804	-0.0299719704927492	0.532857166376757	0.833333333333333	73.9870691144118
LOC105193807	-0.0802497358936108	-1.29400757680359	7	566.116448616639
LOC105193808	0.167821386210052	0.0795467848070692	1.08333333333333	599.619708399662
LOC105193812	0.591783814416427	-0.58092292014165	6.25	1217.07747144718
LOC105193814	-0.188428941096468	0.654883600919388	7.25	12.4958753806607
LOC105193815	0.224403774426769	-0.463151240408966	13.5833333333333	408.846302159704
LOC105193816	0.187713779708471	0.55430410667934	3.58333333333333	119.581311606701
LOC105193817	-0.0996377089096339	0.523103304827388	2.08333333333333	1242.72768681561
LOC105193818	0.183548634700887	-0.0677741522168051	0.916666666666667	79.3535883663171
LOC105193819	0.0125901353366239	0.596209546264633	8.33333333333333	326.94360613585
LOC105193820	-0.00556870105184322	-0.481780107957089	25.6666666666667	1543.17924546394
LOC105193821	0.122242977705876	-0.700457960257038	19.6666666666667	900.369108907364
LOC105193822	1.3390073182461	0.158313738213185	2.16666666666667	12.2051838495192
LOC105193823	-0.183548634854257	-0.616512463973163	0.916666666666667	115.216802884025
LOC105193824	-0.726448230131939	-1.13868159558873	5.75	5157.40815545941
LOC105193825	-1.86959148383485	1.91463594672903	11.75	155.183067778733
LOC105193826	0.134093506583445	-0.0451151952096248	1.25	876.025109305821
LOC105193827	0.301512942512016	-0.602610564711775	10	1496.29008880551
LOC105193828	0.103649570312126	0.263190068244333	4.5	355.486147307679
LOC105193829	0.265213513878673	-0.745148194689884	12.8333333333333	968.59107235811
LOC105193830	0.181608043775243	0.112478572697557	3.83333333333333	182.938907443658
LOC105193831	0.907766547759299	-1.30816584017162	29.5	748.124878603158
LOC105193832	-0.689319743750844	-0.0812762917233501	5.83333333333333	481.659084072753
LOC105193833	0.13657665856869	-0.35888257018301	16.25	1139.36986209904
LOC105193834	-0.0814980435845776	-0.570039276625368	10	1043.57184261796
LOC105193835	0.203779751892042	-0.326266995247051	5.5	118.034971681461
LOC105193837	0.432672657008686	-1.04299796018141	20.5	221.731336206315
LOC105193839	-0.248432219787502	0.51732073731334	7	507.34242010953
LOC105193871	0.168629063970221	-0.239871331744436	12.1666666666667	558.366219039922
LOC105193872	-0.903924111648001	1.53720097091566	0.916666666666667	16.231060259205
LOC105194381	-0.40494161650119	-0.239141081357399	12.25	624.128680707617
LOC105194416	-0.155482959655471	-0.380445271802397	20	1232.057562771
LOC105194425	1.71775010509372	0.706140796510007	1.66666666666667	281.821731948284
LOC105194434	-2.47537799457906	0.0865374207153619	17.1666666666667	40.3268527536444
LOC105194441	-1.43251996278425	0.533202943858884	3.58333333333333	532.965421893776
LOC105194453	-0.0186317175977056	-0.0481006771986909	15.5833333333333	754.760809635461
LOC105194461	-0.0981071085291113	0.00189568989702987	3.83333333333333	221.906124668017
LOC105194481	-0.756431343948667	2.75648307634191	72.5833333333333	202701.579424602
LOC105194487	0.318265430248776	4.77131510001403	5.91666666666667	45.9302071704771
LOC105194495	-1.10749087082657	2.34433201616215	8.58333333333333	2854.35656085509
LOC105194510	0.386238686657406	-0.454121433407957	0.833333333333333	51.2634023216074
LOC105194522	0.0751345404253095	-0.170247826084227	2.75	786.053548577549
LOC105194585	0.0594661357423023	-0.0588625088491508	10.5833333333333	832.113462295414
LOC105194616	-0.201714387835807	0.674603386811437	0.75	73.0135622423464
LOC105194663	-0.37295966756892	0.195486409518841	15	555.517231236478
LOC105194672	-0.122236684343336	-0.0982336244742659	29.5	2409.21777958091
LOC105194675	0.110148623244597	-0.584411584358839	13.4166666666667	582.58862628421
LOC105194680	0.283736733311062	-0.045314766723086	1.91666666666667	38.6741494650228
LOC105194690	0.709266902948662	-2.21887852240981	7	48.4630031660735
LOC105194738	-0.134871055567813	-0.0516667420547217	1.25	30.1263403914783
LOC105194763	-0.0622174420303691	-0.0523319346057583	8	532.378929885959
LOC105194795	-0.320023336906937	0.680356257312373	4.66666666666667	277.28135055155
LOC105194811	2.80830316599586	-1.14133606398689	21.9166666666667	920.702930722706
LOC105194836	0.521197114432348	-0.452299277014764	10.8333333333333	195.380501458077
LOC105194887	0.0178922334157032	-0.658993467805142	1.16666666666667	57.223244146627
LOC105195673	-6.00642469465297e-17	-0.0126133351084265	0.833333333333333	31.7659556644787
LOC105195681	0.215234114127135	0.363655145724657	1.83333333333333	188.818475585707
LOC105195701	0.0827058155721745	-0.467101570805277	8.41666666666667	253.222552021363
LOC105195710	-0.386238687525253	-0.255269621957437	0.833333333333333	165.185095108438
LOC105195720	-0.421409868498881	-0.59366940090824	26.3333333333333	114.15853773473
LOC105195733	-0.783373701862444	0.582302855719362	2.33333333333333	18.7034502146692
LOC105195750	0.332922413460092	0.381725435768223	4.16666666666667	1577.58090415482
LOC105195766	0.0465308567517642	-0.396974490823957	2.16666666666667	30.4886224227753
LOC105195772	-0.25370683350125	1.04590596786825	1.08333333333333	82.1984724042863
LOC105195781	-0.858855384679045	-0.768972734487929	2.91666666666667	425.905392504034
LOC105195789	-0.135530469693729	-0.501171224627508	7.41666666666667	585.837250775169
LOC105195797	-0.0185474161552482	-0.627591575308309	11.5	234.811847096359
LOC105196903	-0.207658926347473	-1.26122396491643	3.08333333333333	54.0284599018855
LOC105196904	-0.260439590800365	-1.0973812358717	1.33333333333333	43.5849083373947
LOC105196907	0.23596819318235	-0.235562880220016	4.08333333333333	826.780195016721
LOC105196909	-0.0768036106637636	-0.458390549844958	14.5833333333333	529.825823841574
LOC105196910	0.250193590349257	-0.297714726574547	5.66666666666667	33.65671469933
LOC105199287	-0.595310154761501	2.75062195787601	15.75	334.949611616259
LOC105199288	-0.995160988369575	2.45000585894627	1	64.1780598767386
LOC105199289	-0.931117042517226	0.209321239881705	2.66666666666667	151.365254061894
LOC105199290	-0.906110578639303	-0.131069827146786	3.58333333333333	1871.77491477678
LOC105199292	-0.0057210127240911	-0.305839767395283	6.5	382.299709421184
LOC105199293	-0.56538187035925	0.315563174198511	10.1666666666667	361.437481611902
LOC105199295	-0.884105053635901	0.190188317319639	24	838.777409411754
LOC105199296	0.389472839502485	0.156645668730211	5.91666666666667	542.714833197034
LOC105199297	-0.273754609584728	0.772082430541165	5	1226.31792380718
LOC105199298	-0.354945666982776	-0.194270835262148	1.41666666666667	11.1970854567802
LOC105199299	-0.370320366155392	-0.772353561704006	4.66666666666667	726.204579767572
LOC105199300	0.148744969708218	-0.157341432632548	10.4166666666667	470.811318780317
LOC105199302	0.219550834508688	0.777266208905455	3.5	139.097084048084
LOC105199303	0.111238728252063	-0.586823946131458	10.5833333333333	531.442372001827
LOC105199304	0.309831447484792	-0.064544315654553	10.0833333333333	561.386525934446
LOC105199305	0.472888636366733	-1.29467670304996	3.75	95.0871418171538
LOC105199307	0.407538492644461	-0.128586553150593	4.5	244.400705074728
LOC105199309	0.226732283339774	0.161376853448274	9.91666666666667	1936.73828002949
LOC105199310	-0.606436496364445	0.698394902618525	5.16666666666667	634.638758067861
LOC105199311	-0.265184290080539	0.159532381445776	11.25	275.649720969339
LOC105199313	0.215733973821424	0.355728704632699	15.5833333333333	1037.11963568111
LOC105199314	0.184619983031515	0.109143971197988	2.16666666666667	688.423193447025
LOC105199315	-2.5770198131121	3.97253225176401	1.58333333333333	36.6974668329206
LOC105199316	-1.14465286348821	1.43982220958249	7.5	181.527034285501
LOC105199317	-0.3270458500312	0.599404697724917	1	33.3577052788415
LOC105199318	0.37936241834604	-0.569313270365324	11	693.330891147846
LOC105199319	0.0558955713214753	3.88471941129598	3.41666666666667	156.309758486066
LOC105199320	-0.514515900969186	-0.922045191316385	3.66666666666667	1357.69350163369
LOC105199321	1.70739096275875	-0.394809305210702	1.91666666666667	58.0809627297289
LOC105199322	0.893233228856635	-0.0453909705923743	1.41666666666667	48.3486116045755
LOC105199323	-0.898438134312342	2.07039292131537	1.66666666666667	102.058326546124
LOC105199326	0.298459467152766	2.92414972934119	2.5	126.518607718516
LOC105199327	-1.5159546222663	2.80144843012128	8.25	686.588590592179
LOC105199328	0.519472942666922	1.87211704730286	8.16666666666667	170.615075684409
LOC105199329	-0.321722093193723	-1.08133242571785	13.25	1406.1884480579
LOC105199332	1.73172003209102	-0.82290590359181	16.9166666666667	689.75875710069
LOC105199335	-0.319297441083779	1.1126023825001	0.833333333333333	253.732711610227
LOC105199336	-0.0734609063828539	-0.0631594144808009	35.6666666666667	429.040443779169
LOC105199337	0.105535900121983	-0.501960403244062	12.6666666666667	329.710983583394
LOC105199338	0.402514408009359	-0.48911825952802	5.58333333333333	465.537404153644
LOC105199340	0.246393523731069	-0.440141671394744	9.91666666666667	219.224410098883
LOC105199341	-0.243035439689926	0.407254402088877	12.5833333333333	1434.35691311814
LOC105199342	0.513159844171443	-0.826251000059323	11.4166666666667	224.517763184953
LOC105199343	0.259636851422791	-0.186784375615261	11.25	448.368225253638
LOC105199345	0.794635123855683	-0.428015198712212	11.75	1086.10895605108
LOC105199346	0.327045849403641	-1.05042304941557	1	37.9181976705049
LOC105199349	-0.127313283119121	-0.0370776331207735	1.41666666666667	56.8627745303664
LOC105199351	-0.0675353968232141	-0.118853086013129	14	362.766062272032
LOC105199354	-0.12987323109836	2.66195502798574	5.66666666666667	41.3486568892641
LOC105199355	1.17074423080704	0.336674513487715	1.41666666666667	11.9002004718644
LOC105199356	0.991284773378593	-1.44729833119657	1.5	114.542779099823
LOC105199484	0.0366340688897861	0.0745109668433775	1.33333333333333	291.271808737381
LOC105199492	-0.0956846225712894	-1.14709577854854	10.4166666666667	255.15413267748
LOC105199531	1.34292528971447	2.08182458120361	18.75	12219.0699660024
LOC105199549	-0.41289058225762	0.626025042019815	1.83333333333333	21.1601216507981
LOC105199559	1.13101477688552	-0.96952078627746	1.08333333333333	8.73044772500369
LOC105199565	0.461361538161063	-0.792599012799052	8.91666666666667	1565.38807229412
LOC105199580	-0.386238687525253	-0.412743760789112	0.833333333333333	266.374231009583
LOC105199591	0.416072604034915	-0.891117764463135	5.33333333333333	1321.89110923611
LOC105199601	-0.294909280312712	0.0574574236011082	15.5833333333333	1068.30675994717
LOC105199617	-0.675409811179535	0.34779694282848	3.33333333333333	45.0819037447695
LOC105199655	0.282391785451382	-0.0734610120764518	1.91666666666667	87.9657352469584
LOC105199708	0.445387304929079	-0.876625036447821	7.75	95.3465849131065
LOC105199719	0.214487755637031	-0.577619298112097	37.6666666666667	5028.71873679372
LOC105199727	-1.23826785728101	-0.387132479901334	1.5	38.092735720708
LOC105199746	-0.0196028052014412	0.259256291199658	1.83333333333333	123.78451805203
LOC105199756	3.03346241535113	0.549634381260104	3.58333333333333	80.3386623047883
LOC105199767	0.466620286241097	0.0386684345967595	5.66666666666667	311.377951644302
LOC105199780	0.274035214616476	-0.299474473015003	3.75	602.735709437893
LOC105199786	-0.638393868798014	-0.758025025523675	2	81.3378567225249
LOC105199789	-1.26970151769403	2.12777393671991	2.91666666666667	60.6171649816286
LOC105199797	-0.162228594829886	-0.686250458632811	13.25	751.880609438913
LOC105199803	0.204907598739085	1.87244245942055	2	19.1589207503071
LOC105199810	0.3849521407569	0.769208968403134	2.08333333333333	7.27292538751109
LOC105199816	0.0301551248249819	-0.035642672650529	0.833333333333333	7.55861716924933
LOC105199893	0.722073593861679	0.879395988432318	1.25	5.73432586889221
LOC105199901	0.544201551981824	1.48188949549007	13.1666666666667	299.836292329562
LOC105201520	0.220958551549687	-0.47893007045713	4.25	182.297661965558
LOC105201521	0.625930364284241	2.62381021863909	5.41666666666667	228.642705789882
LOC105201523	-0.259960631472141	-0.671403476216848	4.75	198.432312703256
LOC105201526	0.553371783569747	1.5793612069651	1.16666666666667	9.79396765861853
LOC105201527	-0.121923793768699	-0.450198110493952	5.08333333333333	1673.63666115074
LOC105201528	-0.235910454859176	-1.46074630221742	2.75	71.4059734561951
LOC105201529	0.011301540283884	-1.22607633690719	1.83333333333333	406.500445312883
LOC105201533	-0.252343644406103	-0.601794099560083	33.0833333333333	552.870549783468
LOC105201534	-0.042633312238679	0.270782275810739	5.5	687.248709617913
LOC105201536	1.3283220212751	-1.79372135713992	1.33333333333333	5447.34051422516
LOC105201541	-1.60171325190746e-16	-0.949589719001056	1.83333333333333	2245.99918775881
LOC105202812	4.53675033898683	-0.997262280408932	9.91666666666667	166.88906518424
LOC105202813	-0.359607429538342	-0.318445779461118	7.91666666666667	394.07203817177
LOC105202814	1.8019258808831e-16	1.27725356707602	3.16666666666667	41.534892891836
LOC105202816	2.889411000019	-2.2409957411274	2.08333333333333	1443.2311909395
LOC105202817	1.55823415210014	0.110081850939948	0.916666666666667	34.2109095222676
LOC105202818	0.102310420112994	1.21078865423315	12.5833333333333	2095.00062948575
LOC105202820	1.32198189193494	3.53389449102868	3.08333333333333	794.994039580233
LOC105202821	-1.63851772617622	1.02892513265026	0.75	77.1760012202121
LOC105202822	0.167821386210053	1.32405913271656	1.08333333333333	2277.35547604978
LOC105202823	2.93909559174604	1.76236102733302	3.41666666666667	60.6024995824784
LOC105202826	-0.838446579417881	0.806860075636746	3.25	78.8614824283374
LOC105202831	-0.200082167068082	0.641463277208022	0.75	5.41076418265929
LOC105202834	-0.327598424941737	2.77699631840359	2.66666666666667	81.1485639653293
LOC105203016	0.376366760037699	-0.0928592089762906	3.75	569.914957643828
LOC105203017	-0.12144956725227	-0.40188526425235	1.58333333333333	69.8054844053747
LOC105203018	-0.566091062677797	-1.23222395964188	6.08333333333333	61.8258000680026
LOC105203020	-0.136833759428582	-0.356997253920507	9.5	413.223969611596
LOC105203021	-0.128024298145005	-0.195289826313062	4.5	634.418402653795
LOC105203023	-0.256244378029767	0.378435768279654	4.58333333333333	1785.79116228615
LOC105203024	-1.40149909541903e-15	-0.881670169744565	0.833333333333333	421.865984239548
LOC105203026	-0.157075108559084	-0.645089340097337	0.916666666666667	17.4220799415353
LOC105203027	-0.305000299401757	0.0328642414533959	17.1666666666667	1179.73533802709
LOC105203028	-0.136650040539142	-0.782470298851341	0.916666666666667	80.7352242293887
LOC105203029	-1.21632003435756	1.26812284848264	1.16666666666667	26.3835042665165
LOC105203031	-0.166523586704096	-0.459186268902075	15.25	266.819324506186
LOC105203032	-0.412948651355907	0.346704178173241	15.5833333333333	291.874300071046
LOC105203033	0.25610117753561	-0.262729334832306	12.1666666666667	3651.18101529298
LOC105203034	0.376905136028087	-0.134301228097326	54.9166666666667	5839.21505064219
LOC105203035	0.0778324602156329	0.207698050121614	1.75	848.515290740939
LOC105203036	-0.184249838326492	0.0394050443294279	12.0833333333333	325.942457268353
LOC105203037	0.0825103695328313	0.685539172269896	8.83333333333333	1824.67707750159
LOC105203038	0.0278709162108817	-0.145426837950613	10.4166666666667	698.187419761928
LOC105203039	-0.0295531996557511	0.234210920859715	10.25	260.529892890126
LOC105203040	0.417399079055621	-0.578054522242267	8.16666666666667	381.319663672301
LOC105203041	-0.389530174134775	0.949985913413792	2.33333333333333	1169.53024328976
LOC105203044	-0.0220201328153227	-1.04247083533739	1.33333333333333	52.227133444847
LOC105203046	0.293236261237649	-0.888101199589048	1	132.499391760778
LOC105203048	0.0267426621437922	-0.121262796146125	10.6666666666667	604.029190147081
LOC105203049	-0.298563666322291	0.612737242680528	13.3333333333333	135.951078704387
LOC105203050	-0.0593476167368031	-0.309331053277114	18.9166666666667	966.793484879979
LOC105203051	-0.228707856955312	-0.25662828223861	1.5	126.279760737648
LOC105203052	-0.0887097555932036	-0.233772658025054	20.6666666666667	2058.58713810389
LOC105203053	-0.0279649456689299	0.0176541133025784	5.5	145.324546289377
LOC105203055	0.140186805282512	-0.272668045058672	2.66666666666667	15.6232067233112
LOC105203056	0.161348008768894	-0.0623234588643002	16.25	1008.17514649232
LOC105203057	0.209781034509325	-0.228270670365635	7	793.293549315554
LOC105203059	0.653315539111757	1.76341626883182	1.66666666666667	236.768400995722
LOC105203060	0.00819955549335581	0.618659653576117	4.83333333333333	386.622342161205
LOC105203061	0.390166528198843	-0.781638346330975	10.5	115.221277927894
LOC105203063	0.172008049344928	1.32871462247985	2.91666666666667	468.83315248487
LOC105203064	-0.00749169276990572	1.22844732692707	3.83333333333333	8728.41618214104
LOC105203065	1.97829291269536	-1.3381135349532	12.5833333333333	1413.81565625329
LOC105203067	-0.176109078099881	0.873683785746176	2	285.111857774052
LOC105203068	-0.038155516844073	0.352522492038306	4	5.18952395702098
LOC105203069	0	-0.0800611961226111	1	597.768070337976
LOC105203071	-0.249895432228624	1.15811456004194	1.66666666666667	138.132266580331
LOC105203072	0.223683497623139	-0.13591298889118	19	287.317783128649
LOC105203073	-0.386238687525253	0.115854003550218	0.833333333333333	313.621218213482
LOC105203074	-0.475646272998967	-0.410978149288622	35.8333333333333	1502.97746997545
LOC105203076	0.860060861806353	0.155015940538962	2.33333333333333	690.01118746986
LOC105203077	0.751323817980579	0.654185203126293	7.75	51.4750864391988
LOC105203079	0.528194124314084	0.824105126498092	0.916666666666667	41.1283175565173
LOC105203080	0.100102458656432	1.20002074999519	8.41666666666667	1777.74926161076
LOC105203081	0.194290453554346	0.262282268778391	1.66666666666667	428.691173190407
LOC105203082	0.416895215661167	0.463253111697427	15.0833333333333	361.118173739085
LOC105203085	1.59170254408304e-15	-1.84274454690674	0.833333333333333	15.8633721976435
LOC105203086	-2.94455791589413	2.52718549877564	16.0833333333333	737.548973656537
LOC105203090	0.722135700590749	0.494875069599936	4.83333333333333	1506.3437710747
LOC105203091	0.591674492991822	-1.77218685847999	41.3333333333333	1150.58895582914
LOC105203092	-0.033964689400142	-1.38521402844387	15	71.5589411522272
LOC105203095	0.0270704469514155	0.0821666985421617	5.25	730.554971759664
LOC105203096	0.716612937791229	0.415258192414433	3.41666666666667	393.70263315328
LOC105203097	-0.325333700069146	-0.327147631202587	21	406.420032981424
LOC105204968	-0.315529500761938	0.392950541673796	1	11.7957412610174
LOC105204969	1.76932944208208	0.0800561851010734	4.33333333333333	71.0687996858018
LOC105206526	0.215502537918172	1.32776174040712	0.75	16.7193694912302
LOC105206540	0.363551770333111	-0.115089649357148	12.8333333333333	783.386876187385
LOC105206549	0.125617398352819	-0.405908324017088	12.75	67.5602932816324
LOC105206559	-0.256952100444561	-0.0690878479596101	2.08333333333333	37.2251130435365
LOC105206574	0.67049804670204	-1.11899758246507	11.5	476.098429916967
LOC105206598	-0.0656228098557487	-0.688640145783325	3.08333333333333	138.636779936714
LOC105206612	1.17476943722777	-1.14957454290126	2.66666666666667	292.383165849551
LOC105206620	-0.15545058508927	-0.222656094555459	35.0833333333333	11489.9911342385
LOC105206630	-1.07719424516177	0.195148243580165	1.33333333333333	220.269303220975
LOC105206635	0.274746570092509	-1.94742261280549	10.5	2254.51982998649
LOC105206689	-0.0920614262386642	-0.392117763971688	17.3333333333333	171.211356812131
LOC105206711	0.210958005308483	0.761696831172853	0.916666666666667	257.260840604333
LOC105207370	0.481819072375724	-0.577220452140321	2.83333333333333	2157.12304620803
LOC105207387	-0.238298317101994	-0.326040094463695	4.16666666666667	95.6073464476626
LOC105207396	-0.115039829692511	-0.824264488104167	7.75	346.00897197701
LOC105207402	0.165942572620969	-0.688557151591711	45.4166666666667	7661.23765789101
LOC105207412	-0.60426220609965	0.0497305509960386	9.41666666666667	354.88113376641
LOC105207423	-0.610668290311671	0.973360369309841	0.75	4.91866927474759
LOC105207434	0.183438534808815	0.561418777390777	1.66666666666667	145.00990223704
LOC105207450	0.0499391576610929	3.26647842241543	30.1666666666667	2600.80188620488
LOC105207460	0.0602897428268593	0.187227967593515	4.91666666666667	763.379591205907
LOC105207466	1.36418639502908	-0.174487775640903	1	248.216969980769
LOC105207481	-0.0783440096252324	1.630100723617	39.3333333333333	4319.08878714918
LOC105207492	1.1854632136263	-1.24605010165877	7.66666666666667	1136.09082293322
