# Supplementary material for: Genomic architecture and evolutionary antagonism drive allelic expression bias in the social supergene of red fire ants
Source: eLife journal article supplement (doi:10.7554/elife.55862), 2020-08-10
Supplement: supp [file elife-55862-supp-v1.zip › elife_poa_e55862_Figure_4_figure_supplement_1.pdf]

Differentially expressed  
between variants

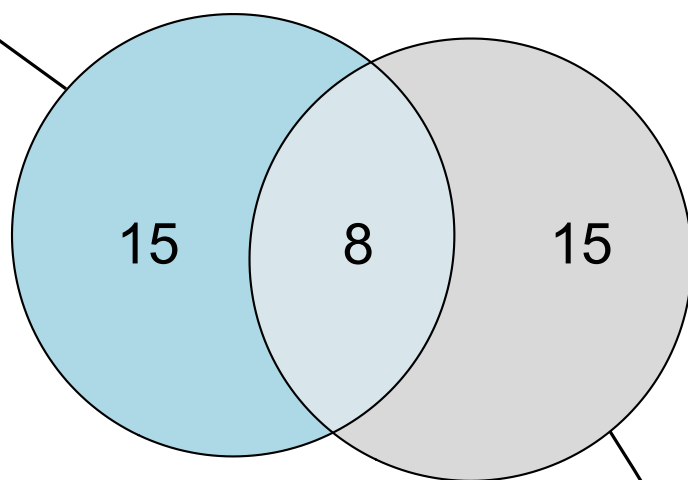

Differentially expressed  
between social forms

256 genes  
analyzed in total
