# Supplementary material for: Genomic architecture and evolutionary antagonism drive allelic expression bias in the social supergene of red fire ants
Source: eLife journal article supplement (doi:10.7554/elife.55862), 2020-08-10
Supplement: supp [file elife-55862-supp-v1.zip › elife_poa_e55862_Figure_4_figure_supplement_2_source_data_1.csv]

gene	reads_b	sample	population	reads_B	total_reads	median_expression	lfc	missense_muts	stop_gain_id	stop_loss_id	all_nonsyn_muts
LOC105193112	16	Queen4	north_america	17	33	34	0.082462160191973	0	0	0	0
LOC105193112	18	Queen6	north_america	12	30	34	-0.547487795302493	0	0	0	0
LOC105193112	16	Queen5	north_america	14	30	34	-0.180572245641821	0	0	0	0
LOC105193112	65	SBSb-virgin-queens-1	taiwan	60	125	34	-0.113656781795567	0	0	0	0
LOC105193112	63	SBSb-virgin-queens-3	taiwan	58	121	34	-0.117356950638159	0	0	0	0
LOC105193112	15	Queen1	north_america	17	32	34	0.169925001442312	0	0	0	0
LOC105193112	11	Queen3	north_america	10	21	34	-0.125530882083859	0	0	0	0
LOC105193112	19	Queen2	north_america	16	35	34	-0.234465253637023	0	0	0	0
LOC105193112	86	SBSb-virgin-queens-2	taiwan	66	152	34	-0.376854305390956	0	0	0	0
LOC105193112	77	SBSb-virgin-queens-4	taiwan	67	144	34	-0.197939377611909	0	0	0	0
LOC105193113	38	Queen6	north_america	36	74	59.5	-0.0759488532332986	0	0	0	0
LOC105193113	25	SBSb-virgin-queens-3	taiwan	17	42	59.5	-0.53051471669878	0	0	0	0
LOC105193113	28	SBSb-virgin-queens-2	taiwan	31	59	59.5	0.142019004872428	0	0	0	0
LOC105193113	32	Queen5	north_america	28	60	59.5	-0.186413124230881	0	0	0	0
LOC105193113	28	SBSb-virgin-queens-4	taiwan	19	47	59.5	-0.53605290024021	0	0	0	0
LOC105193113	32	Queen4	north_america	32	64	59.5	0	0	0	0	0
LOC105193113	31	Queen1	north_america	34	65	59.5	0.129283016944966	0	0	0	0
LOC105193113	37	Queen2	north_america	31	68	59.5	-0.247927513443586	0	0	0	0
LOC105193113	28	SBSb-virgin-queens-1	taiwan	28	56	59.5	0	0	0	0	0
LOC105193113	28	Queen3	north_america	20	48	59.5	-0.465663572348812	0	0	0	0
LOC105193114	8	112W	south_america	7	15	17	-0.169925001442312	0	0	0	0
LOC105193114	7	43QA	south_america	7	14	17	0	0	0	0	0
LOC105193114	20	114CQA	south_america	7	27	17	-1.39231742277876	0	0	0	0
LOC105193114	3	114W	south_america	5	8	17	0.584962500721156	0	0	0	0
LOC105193114	7	43CW	south_america	5	12	17	-0.415037499278844	0	0	0	0
LOC105193114	23	SBSb-virgin-queens-1	taiwan	12	35	17	-0.884522782580064	0	0	0	0
LOC105193114	3	114CQT	south_america	2	5	17	-0.415037499278844	0	0	0	0
LOC105193114	26	SBSb-virgin-queens-3	taiwan	14	40	17	-0.84799690655495	0	0	0	0
LOC105193114	22	Queen1	north_america	22	44	17	0	0	0	0	0
LOC105193114	3	3QT	south_america	9	12	17	1.32192809488736	0	0	0	0
LOC105193114	10	111BQT	south_america	15	25	17	0.540568381362703	0	0	0	0
LOC105193114	0	43QH	south_america	0	0	17	0	0	0	0	0
LOC105193114	11	3QA	south_america	4	15	17	-1.26303440583379	0	0	0	0
LOC105193114	30	SBSb-virgin-queens-4	taiwan	16	46	17	-0.866733469136536	0	0	0	0
LOC105193114	32	SBSb-virgin-queens-2	taiwan	24	56	17	-0.400537929583729	0	0	0	0
LOC105193114	22	Queen4	north_america	20	42	17	-0.131244533278253	0	0	0	0
LOC105193114	29	Queen3	north_america	20	49	17	-0.514573172829758	0	0	0	0
LOC105193114	3	118QH	south_america	4	7	17	0.321928094887362	0	0	0	0
LOC105193114	1	112BQH	south_america	1	2	17	0	0	0	0	0
LOC105193114	2	3QH	south_america	1	3	17	-0.584962500721156	0	0	0	0
LOC105193114	7	112BQT	south_america	10	17	17	0.459431618637297	0	0	0	0
LOC105193114	42	112BQA	south_america	40	82	17	-0.0687127500840142	0	0	0	0
LOC105193114	2	114CQH	south_america	0	2	17	-1.58496250072116	0	0	0	0
LOC105193114	0	43QT	south_america	2	2	17	1.58496250072116	0	0	0	0
LOC105193114	12	118QT	south_america	11	23	17	-0.115477217419936	0	0	0	0
LOC105193114	7	28W	south_america	13	20	17	0.807354922057604	0	0	0	0
LOC105193114	1	111BQH	south_america	0	1	17	-1	0	0	0	0
LOC105193114	10	104W	south_america	7	17	17	-0.459431618637297	0	0	0	0
LOC105193114	20	Queen5	north_america	19	39	17	-0.070389327891398	0	0	0	0
LOC105193114	2	3BW	south_america	2	4	17	0	0	0	0	0
LOC105193114	24	Queen2	north_america	26	50	17	0.111031312388744	0	0	0	0
LOC105193114	40	111BQA	south_america	34	74	17	-0.228268987673117	0	0	0	0
LOC105193114	6	118QA	south_america	9	15	17	0.514573172829758	0	0	0	0
LOC105193114	20	Queen6	north_america	18	38	17	-0.144389909335175	0	0	0	0
LOC105193116	4	3BW	south_america	0	4	14	-2.32192809488736	0	0	0	0
LOC105193116	7	SBSb-virgin-queens-1	taiwan	8	15	14	0.169925001442312	0	0	0	0
LOC105193116	1	Queen6	north_america	1	2	14	0	0	0	0	0
LOC105193116	13	SBSb-virgin-queens-2	taiwan	11	24	14	-0.222392421336448	0	0	0	0
LOC105193116	18	SBSb-virgin-queens-4	taiwan	15	33	14	-0.247927513443586	0	0	0	0
LOC105193116	3	111BQH	south_america	4	7	14	0.321928094887362	0	0	0	0
LOC105193116	8	3QH	south_america	1	9	14	-2.16992500144231	0	0	0	0
LOC105193116	18	SBSb-virgin-queens-3	taiwan	23	41	14	0.337034987277571	0	0	0	0
LOC105193116	6	118QH	south_america	6	12	14	0	0	0	0	0
LOC105193116	10	43CW	south_america	7	17	14	-0.459431618637297	0	0	0	0
LOC105193116	4	43QT	south_america	5	9	14	0.263034405833794	0	0	0	0
LOC105193116	8	3QA	south_america	5	13	14	-0.584962500721156	0	0	0	0
LOC105193116	10	112BQH	south_america	6	16	14	-0.652076696579693	0	0	0	0
LOC105193116	7	114CQH	south_america	6	13	14	-0.192645077942396	0	0	0	0
LOC105193116	11	3QT	south_america	9	20	14	-0.263034405833794	0	0	0	0
LOC105193116	4	Queen3	north_america	4	8	14	0	0	0	0	0
LOC105193116	20	28W	south_america	14	34	14	-0.485426827170242	0	0	0	0
LOC105193116	9	118QT	south_america	8	17	14	-0.15200309344505	0	0	0	0
LOC105193116	13	118QA	south_america	13	26	14	0	0	0	0	0
LOC105193116	17	112BQA	south_america	13	30	14	-0.362570079384708	0	0	0	0
LOC105193116	2	Queen5	north_america	2	4	14	0	0	0	0	0
LOC105193116	3	Queen4	north_america	4	7	14	0.321928094887362	0	0	0	0
LOC105193116	7	43QA	south_america	13	20	14	0.807354922057604	0	0	0	0
LOC105193116	11	104W	south_america	11	22	14	0	0	0	0	0
LOC105193116	5	114W	south_america	6	11	14	0.222392421336448	0	0	0	0
LOC105193116	3	114CQT	south_america	3	6	14	0	0	0	0	0
LOC105193116	18	114CQA	south_america	27	45	14	0.559427408614019	0	0	0	0
LOC105193116	2	Queen1	north_america	3	5	14	0.415037499278844	0	0	0	0
LOC105193116	9	111BQT	south_america	31	40	14	1.67807190511264	0	0	0	0
LOC105193116	2	Queen2	north_america	2	4	14	0	0	0	0	0
LOC105193116	3	43QH	south_america	2	5	14	-0.415037499278844	0	0	0	0
LOC105193116	4	112W	south_america	8	12	14	0.84799690655495	0	0	0	0
LOC105193116	13	112BQT	south_america	10	23	14	-0.347923303420307	0	0	0	0
LOC105193116	25	111BQA	south_america	24	49	14	-0.0565835283663674	0	0	0	0
LOC105193117	10	Queen6	north_america	10	20	21.5	0	0	0	0	0
LOC105193117	12	Queen4	north_america	8	20	21.5	-0.53051471669878	0	0	0	0
LOC105193117	8	Queen1	north_america	9	17	21.5	0.15200309344505	0	0	0	0
LOC105193117	37	SBSb-virgin-queens-4	taiwan	34	71	21.5	-0.118644496498619	0	0	0	0
LOC105193117	10	Queen2	north_america	11	21	21.5	0.125530882083859	0	0	0	0
LOC105193117	30	SBSb-virgin-queens-2	taiwan	33	63	21.5	0.133266530863464	0	0	0	0
LOC105193117	34	SBSb-virgin-queens-1	taiwan	46	80	21.5	0.425305834732671	0	0	0	0
LOC105193117	5	Queen5	north_america	4	9	21.5	-0.263034405833794	0	0	0	0
LOC105193117	27	SBSb-virgin-queens-3	taiwan	35	62	21.5	0.362570079384708	0	0	0	0
LOC105193117	12	Queen3	north_america	10	22	21.5	-0.241008099503795	0	0	0	0
LOC105193118	10	SBSb-virgin-queens-3	taiwan	10	20	18.5	0	0	0	0	0
LOC105193118	6	Queen6	north_america	8	14	18.5	0.362570079384708	0	0	0	0
LOC105193118	8	Queen1	north_america	8	16	18.5	0	0	0	0	0
LOC105193118	16	SBSb-virgin-queens-4	taiwan	14	30	18.5	-0.180572245641821	0	0	0	0
LOC105193118	12	SBSb-virgin-queens-2	taiwan	12	24	18.5	0	0	0	0	0
LOC105193118	5	Queen4	north_america	10	15	18.5	0.874469117916141	0	0	0	0
LOC105193118	8	Queen5	north_america	8	16	18.5	0	0	0	0	0
LOC105193118	11	Queen2	north_america	6	17	18.5	-0.777607578663552	0	0	0	0
LOC105193118	8	SBSb-virgin-queens-1	taiwan	12	20	18.5	0.53051471669878	0	0	0	0
LOC105193118	10	Queen3	north_america	10	20	18.5	0	0	0	0	0
LOC105193119	4	Queen6	north_america	5	9	6	0.263034405833794	0	0	0	0
LOC105193119	1	SBSb-virgin-queens-3	taiwan	2	3	6	0.584962500721156	0	0	0	0
LOC105193119	2	Queen3	north_america	4	6	6	0.736965594166206	0	0	0	0
LOC105193119	3	Queen2	north_america	4	7	6	0.321928094887362	0	0	0	0
LOC105193119	2	SBSb-virgin-queens-1	taiwan	2	4	6	0	0	0	0	0
LOC105193119	2	SBSb-virgin-queens-4	taiwan	3	5	6	0.415037499278844	0	0	0	0
LOC105193119	4	Queen5	north_america	8	12	6	0.84799690655495	0	0	0	0
LOC105193119	2	Queen4	north_america	2	4	6	0	0	0	0	0
LOC105193119	4	Queen1	north_america	8	12	6	0.84799690655495	0	0	0	0
LOC105193119	2	SBSb-virgin-queens-2	taiwan	4	6	6	0.736965594166206	0	0	0	0
LOC105193122	2	SBSb-virgin-queens-4	taiwan	5	7	6.5	1	0	0	0	0
LOC105193122	8	SBSb-virgin-queens-2	taiwan	3	11	6.5	-1.16992500144231	0	0	0	0
LOC105193122	1	Queen1	north_america	1	2	6.5	0	0	0	0	0
LOC105193122	8	Queen2	north_america	4	12	6.5	-0.84799690655495	0	0	0	0
LOC105193122	13	SBSb-virgin-queens-1	taiwan	11	24	6.5	-0.222392421336448	0	0	0	0
LOC105193122	4	Queen6	north_america	2	6	6.5	-0.736965594166206	0	0	0	0
LOC105193122	6	SBSb-virgin-queens-3	taiwan	4	10	6.5	-0.485426827170242	0	0	0	0
LOC105193122	1	Queen3	north_america	3	4	6.5	1	0	0	0	0
LOC105193122	2	Queen4	north_america	2	4	6.5	0	0	0	0	0
LOC105193122	1	Queen5	north_america	1	2	6.5	0	0	0	0	0
LOC105193128	3	SBSb-virgin-queens-2	taiwan	4	7	6.5	0.321928094887362	0	0	0	0
LOC105193128	2	SBSb-virgin-queens-1	taiwan	0	2	6.5	-1.58496250072116	0	0	0	0
LOC105193128	2	SBSb-virgin-queens-4	taiwan	4	6	6.5	0.736965594166206	0	0	0	0
LOC105193128	4	SBSb-virgin-queens-3	taiwan	8	12	6.5	0.84799690655495	0	0	0	0
LOC105193131	12	Queen1	north_america	16	28	21	0.387023123109247	0	0	0	0
LOC105193131	12	Queen3	north_america	14	26	21	0.206450877467426	0	0	0	0
LOC105193131	0	SBSb-virgin-queens-3	taiwan	1	1	21	1	0	0	0	0
LOC105193131	1	SBSb-virgin-queens-1	taiwan	1	2	21	0	0	0	0	0
LOC105193131	10	Queen4	north_america	11	21	21	0.125530882083859	0	0	0	0
LOC105193131	9	Queen2	north_america	12	21	21	0.37851162325373	0	0	0	0
LOC105193131	16	Queen6	north_america	15	31	21	-0.0874628412503394	0	0	0	0
LOC105193131	1	SBSb-virgin-queens-2	taiwan	1	2	21	0	0	0	0	0
LOC105193131	0	SBSb-virgin-queens-4	taiwan	1	1	21	1	0	0	0	0
LOC105193131	14	Queen5	north_america	21	35	21	0.552541023028779	0	0	0	0
LOC105193132	6	Queen4	north_america	10	16	8	0.652076696579693	0	0	0	0
LOC105193132	0	114W	south_america	4	4	8	2.32192809488736	0	0	0	0
LOC105193132	1	112BQT	south_america	5	6	8	1.58496250072116	0	0	0	0
LOC105193132	2	118QT	south_america	2	4	8	0	0	0	0	0
LOC105193132	4	104W	south_america	10	14	8	1.13750352374994	0	0	0	0
LOC105193132	13	Queen3	north_america	6	19	8	-1	0	0	0	0
LOC105193132	8	111BQT	south_america	6	14	8	-0.362570079384708	0	0	0	0
LOC105193132	19	SBSb-virgin-queens-1	taiwan	17	36	8	-0.15200309344505	0	0	0	0
LOC105193132	2	43QT	south_america	3	5	8	0.415037499278844	0	0	0	0
LOC105193132	1	112BQH	south_america	4	5	8	1.32192809488736	0	0	0	0
LOC105193132	14	Queen2	north_america	9	23	8	-0.584962500721156	0	0	0	0
LOC105193132	0	114CQH	south_america	2	2	8	1.58496250072116	0	0	0	0
LOC105193132	2	114CQA	south_america	2	4	8	0	0	0	0	0
LOC105193132	5	3QA	south_america	7	12	8	0.415037499278844	0	0	0	0
LOC105193132	1	28W	south_america	6	7	8	1.8073549220576	0	0	0	0
LOC105193132	1	111BQH	south_america	2	3	8	0.584962500721156	0	0	0	0
LOC105193132	0	118QH	south_america	2	2	8	1.58496250072116	0	0	0	0
LOC105193132	1	112W	south_america	4	5	8	1.32192809488736	0	0	0	0
LOC105193132	20	Queen5	north_america	15	35	8	-0.39231742277876	0	0	0	0
LOC105193132	18	SBSb-virgin-queens-4	taiwan	23	41	8	0.337034987277571	0	0	0	0
LOC105193132	6	43QA	south_america	4	10	8	-0.485426827170242	0	0	0	0
LOC105193132	14	111BQA	south_america	30	44	8	1.04730571477836	0	0	0	0
LOC105193132	22	112BQA	south_america	30	52	8	0.430634354329862	0	0	0	0
LOC105193132	17	Queen1	north_america	4	21	8	-1.84799690655495	0	0	0	0
LOC105193132	0	114CQT	south_america	1	1	8	1	0	0	0	0
LOC105193132	1	3QH	south_america	2	3	8	0.584962500721156	0	0	0	0
LOC105193132	2	43CW	south_america	4	6	8	0.736965594166206	0	0	0	0
LOC105193132	0	3BW	south_america	1	1	8	1	0	0	0	0
LOC105193132	2	118QA	south_america	4	6	8	0.736965594166206	0	0	0	0
LOC105193132	17	Queen6	north_america	10	27	8	-0.710493382805015	0	0	0	0
LOC105193132	12	SBSb-virgin-queens-3	taiwan	16	28	8	0.387023123109247	0	0	0	0
LOC105193132	0	43QH	south_america	2	2	8	1.58496250072116	0	0	0	0
LOC105193132	3	3QT	south_america	6	9	8	0.807354922057604	0	0	0	0
LOC105193132	16	SBSb-virgin-queens-2	taiwan	7	23	8	-1.08746284125034	0	0	0	0
LOC105193134	23	118QA	south_america	39	62	38	0.736965594166206	1	0	0	1
LOC105193134	5	43QA	south_america	46	51	38	2.96962635095648	1	0	0	1
LOC105193134	16	118QH	south_america	28	44	38	0.770518153877233	1	0	0	1
LOC105193134	9	Queen4	north_america	29	38	38	1.58496250072116	1	0	0	1
LOC105193134	47	118QT	south_america	105	152	38	1.14295795384204	1	0	0	1
LOC105193134	16	111BQT	south_america	45	61	38	1.43609911480667	1	0	0	1
LOC105193134	4	114CQH	south_america	4	8	38	0	1	0	0	1
LOC105193134	5	Queen5	north_america	17	22	38	1.58496250072116	1	0	0	1
LOC105193134	4	3QH	south_america	9	13	38	1	1	0	0	1
LOC105193134	18	112BQA	south_america	64	82	38	1.77444029958487	1	0	0	1
LOC105193134	9	112W	south_america	37	46	38	1.92599941855622	1	0	0	1
LOC105193134	12	43CW	south_america	59	71	38	2.20645087746743	1	0	0	1
LOC105193134	1	SBSb-virgin-queens-4	taiwan	1	2	38	0	1	0	0	1
LOC105193134	12	Queen3	north_america	24	36	38	0.943416471633633	1	0	0	1
LOC105193134	4	43QH	south_america	10	14	38	1.13750352374994	1	0	0	1
LOC105193134	18	114CQT	south_america	34	52	38	0.881355503501381	1	0	0	1
LOC105193134	1	114CQA	south_america	1	2	38	0	1	0	0	1
LOC105193134	13	43QT	south_america	45	58	38	1.71620703399941	1	0	0	1
LOC105193134	6	3QT	south_america	44	50	38	2.68449817427207	1	0	0	1
LOC105193134	10	112BQH	south_america	22	32	38	1.06413033741972	1	0	0	1
LOC105193134	1	SBSb-virgin-queens-3	taiwan	1	2	38	0	1	0	0	1
LOC105193134	14	111BQH	south_america	24	38	38	0.736965594166206	1	0	0	1
LOC105193134	9	Queen2	north_america	25	34	38	1.37851162325373	1	0	0	1
LOC105193134	40	111BQA	south_america	86	126	38	1.08539149123064	1	0	0	1
LOC105193134	1	SBSb-virgin-queens-2	taiwan	3	4	38	1	1	0	0	1
LOC105193134	8	Queen6	north_america	18	26	38	1.07800251200127	1	0	0	1
LOC105193134	7	3QA	south_america	42	49	38	2.4262647547021	1	0	0	1
LOC105193134	27	28W	south_america	76	103	38	1.4594316186373	1	0	0	1
LOC105193134	14	104W	south_america	47	61	38	1.67807190511264	1	0	0	1
LOC105193134	0	3BW	south_america	6	6	38	2.8073549220576	1	0	0	1
LOC105193134	30	112BQT	south_america	60	90	38	0.976541027176011	1	0	0	1
LOC105193134	9	114W	south_america	24	33	38	1.32192809488736	1	0	0	1
LOC105193134	6	Queen1	north_america	13	19	38	1	1	0	0	1
LOC105193134	6	SBSb-virgin-queens-1	taiwan	6	12	38	0	1	0	0	1
LOC105193135	2	3QH	south_america	4	6	16	0.736965594166206	0	0	0	0
LOC105193135	6	3QT	south_america	17	23	16	1.36257007938471	0	0	0	0
LOC105193135	1	3BW	south_america	2	3	16	0.584962500721156	0	0	0	0
LOC105193135	22	118QA	south_america	4	26	16	-2.20163386116965	0	0	0	0
LOC105193135	18	114CQT	south_america	16	34	16	-0.160464672193246	0	0	0	0
LOC105193135	20	112BQT	south_america	9	29	16	-1.0703893278914	0	0	0	0
LOC105193135	9	112W	south_america	3	12	16	-1.32192809488736	0	0	0	0
LOC105193135	7	114CQA	south_america	2	9	16	-1.41503749927884	0	0	0	0
LOC105193135	14	43QT	south_america	6	20	16	-1.09953567355091	0	0	0	0
LOC105193135	4	112BQH	south_america	2	6	16	-0.736965594166206	0	0	0	0
LOC105193135	36	112BQA	south_america	13	49	16	-1.40209844357135	0	0	0	0
LOC105193135	13	SBSb-virgin-queens-2	taiwan	8	21	16	-0.637429920615292	0	0	0	0
LOC105193135	4	43QH	south_america	7	11	16	0.678071905112638	0	0	0	0
LOC105193135	9	Queen1	north_america	4	13	16	-1	0	0	0	0
LOC105193135	2	SBSb-virgin-queens-4	taiwan	4	6	16	0.736965594166206	0	0	0	0
LOC105193135	40	111BQA	south_america	8	48	16	-2.18762700317577	0	0	0	0
LOC105193135	9	3QA	south_america	2	11	16	-1.73696559416621	0	0	0	0
LOC105193135	3	114CQH	south_america	3	6	16	0	0	0	0	0
LOC105193135	29	111BQT	south_america	9	38	16	-1.58496250072116	0	0	0	0
LOC105193135	2	SBSb-virgin-queens-3	taiwan	2	4	16	0	0	0	0	0
LOC105193135	10	SBSb-virgin-queens-1	taiwan	6	16	16	-0.652076696579693	0	0	0	0
LOC105193135	7	118QH	south_america	2	9	16	-1.41503749927884	0	0	0	0
LOC105193135	8	Queen5	north_america	3	11	16	-1.16992500144231	0	0	0	0
LOC105193135	12	114W	south_america	1	13	16	-2.70043971814109	0	0	0	0
LOC105193135	27	28W	south_america	4	31	16	-2.48542682717024	0	0	0	0
LOC105193135	12	Queen2	north_america	6	18	16	-0.893084796083488	0	0	0	0
LOC105193135	14	104W	south_america	4	18	16	-1.58496250072116	0	0	0	0
LOC105193135	8	43QA	south_america	16	24	16	0.917537839808027	0	0	0	0
LOC105193135	5	111BQH	south_america	4	9	16	-0.263034405833794	0	0	0	0
LOC105193135	12	Queen3	north_america	5	17	16	-1.11547721741994	0	0	0	0
LOC105193135	7	Queen6	north_america	4	11	16	-0.678071905112638	0	0	0	0
LOC105193135	36	118QT	south_america	7	43	16	-2.20945336562895	0	0	0	0
LOC105193135	12	43CW	south_america	4	16	16	-1.37851162325373	0	0	0	0
LOC105193135	11	Queen4	north_america	6	17	16	-0.777607578663552	0	0	0	0
LOC105193144	4	SBSb-virgin-queens-4	taiwan	17	21	7.5	1.84799690655495	0	0	0	0
LOC105193144	3	SBSb-virgin-queens-3	taiwan	7	10	7.5	1	0	0	0	0
LOC105193144	0	SBSb-virgin-queens-2	taiwan	2	2	7.5	1.58496250072116	0	0	0	0
LOC105193144	3	SBSb-virgin-queens-1	taiwan	2	5	7.5	-0.415037499278844	0	0	0	0
LOC105193145	38	SBSb-virgin-queens-2	taiwan	22	60	38	-0.761840262805235	0	0	0	0
LOC105193145	19	Queen6	north_america	21	40	38	0.137503523749935	0	0	0	0
LOC105193145	18	SBSb-virgin-queens-3	taiwan	17	35	38	-0.0780025120012732	0	0	0	0
LOC105193145	20	Queen2	north_america	18	38	38	-0.144389909335175	0	0	0	0
LOC105193145	16	Queen5	north_america	15	31	38	-0.0874628412503394	0	0	0	0
LOC105193145	28	SBSb-virgin-queens-1	taiwan	13	41	38	-1.05062607306997	0	0	0	0
LOC105193145	20	Queen4	north_america	18	38	38	-0.144389909335175	0	0	0	0
LOC105193145	32	SBSb-virgin-queens-4	taiwan	22	54	38	-0.52083216330144	0	0	0	0
LOC105193145	15	Queen3	north_america	14	29	38	-0.0931094043914815	0	0	0	0
LOC105193145	12	Queen1	north_america	14	26	38	0.206450877467426	0	0	0	0
LOC105193217	5	SBSb-virgin-queens-4	taiwan	14	19	10	1.32192809488736	0	0	0	0
LOC105193217	2	SBSb-virgin-queens-2	taiwan	15	17	10	2.41503749927884	0	0	0	0
LOC105193217	3	Queen3	north_america	4	7	10	0.321928094887362	0	0	0	0
LOC105193217	5	Queen4	north_america	6	11	10	0.222392421336448	0	0	0	0
LOC105193217	3	Queen5	north_america	3	6	10	0	0	0	0	0
LOC105193217	6	SBSb-virgin-queens-1	taiwan	17	23	10	1.36257007938471	0	0	0	0
LOC105193217	4	Queen2	north_america	5	9	10	0.263034405833794	0	0	0	0
LOC105193217	3	Queen6	north_america	3	6	10	0	0	0	0	0
LOC105193217	5	SBSb-virgin-queens-3	taiwan	17	22	10	1.58496250072116	0	0	0	0
LOC105193217	1	Queen1	north_america	1	2	10	0	0	0	0	0
LOC105193218	13	Queen2	north_america	12	25	9.5	-0.106915203916512	0	0	0	0
LOC105193218	1	Queen1	north_america	1	2	9.5	0	0	0	0	0
LOC105193218	5	SBSb-virgin-queens-3	taiwan	6	11	9.5	0.222392421336448	0	0	0	0
LOC105193218	6	Queen6	north_america	4	10	9.5	-0.485426827170242	0	0	0	0
LOC105193218	3	SBSb-virgin-queens-1	taiwan	6	9	9.5	0.807354922057604	0	0	0	0
LOC105193218	4	SBSb-virgin-queens-2	taiwan	4	8	9.5	0	0	0	0	0
LOC105193218	5	SBSb-virgin-queens-4	taiwan	4	9	9.5	-0.263034405833794	0	0	0	0
LOC105193218	3	Queen5	north_america	5	8	9.5	0.584962500721156	0	0	0	0
LOC105193218	7	Queen3	north_america	8	15	9.5	0.169925001442312	0	0	0	0
LOC105193218	14	Queen4	north_america	11	25	9.5	-0.321928094887362	0	0	0	0
LOC105193219	11	Queen5	north_america	8	19	38.5	-0.415037499278844	0	0	0	0
LOC105193219	16	Queen6	north_america	10	26	38.5	-0.628031222613042	0	0	0	0
LOC105193219	12	Queen1	north_america	10	22	38.5	-0.241008099503795	0	0	0	0
LOC105193219	92	SBSb-virgin-queens-2	taiwan	68	160	38.5	-0.430634354329862	0	0	0	0
LOC105193219	20	Queen3	north_america	15	35	38.5	-0.39231742277876	0	0	0	0
LOC105193219	22	Queen2	north_america	20	42	38.5	-0.131244533278253	0	0	0	0
LOC105193219	94	SBSb-virgin-queens-4	taiwan	76	170	38.5	-0.303069067636047	0	0	0	0
LOC105193219	19	Queen4	north_america	12	31	38.5	-0.62148837674627	0	0	0	0
LOC105193219	86	SBSb-virgin-queens-3	taiwan	74	160	38.5	-0.214124805352848	0	0	0	0
LOC105193219	36	SBSb-virgin-queens-1	taiwan	22	58	38.5	-0.685891409571937	0	0	0	0
LOC105193220	7	114CQH	south_america	5	12	75	-0.415037499278844	4	0	0	4
LOC105193220	214	111BQA	south_america	773	987	75	1.84799690655495	4	0	0	4
LOC105193220	83	114CQA	south_america	34	117	75	-1.26303440583379	4	0	0	4
LOC105193220	10	112BQH	south_america	34	44	75	1.66985139830767	4	0	0	4
LOC105193220	20	111BQH	south_america	61	81	75	1.56187888760811	4	0	0	4
LOC105193220	404	SBSb-virgin-queens-2	taiwan	334	738	75	-0.273760812426852	4	0	0	4
LOC105193220	26	Queen5	north_america	20	46	75	-0.362570079384708	4	0	0	4
LOC105193220	150	111BQT	south_america	453	603	75	1.58814374796584	4	0	0	4
LOC105193220	9	118QH	south_america	15	24	75	0.678071905112638	4	0	0	4
LOC105193220	10	114W	south_america	22	32	75	1.06413033741972	4	0	0	4
LOC105193220	111	SBSb-virgin-queens-1	taiwan	84	195	75	-0.397963985919902	4	0	0	4
LOC105193220	12	3QT	south_america	11	23	75	-0.115477217419936	4	0	0	4
LOC105193220	2	114CQT	south_america	2	4	75	0	4	0	0	4
LOC105193220	324	SBSb-virgin-queens-3	taiwan	240	564	75	-0.431406571685855	4	0	0	4
LOC105193220	85	118QA	south_america	119	204	75	0.480625840906421	4	0	0	4
LOC105193220	28	112W	south_america	44	72	75	0.633872101202103	4	0	0	4
LOC105193220	178	112BQA	south_america	313	491	75	0.810804971627371	4	0	0	4
LOC105193220	0	104W	south_america	20	20	75	4.39231742277876	4	0	0	4
LOC105193220	12	118QT	south_america	23	35	75	0.884522782580064	4	0	0	4
LOC105193220	35	Queen6	north_america	34	69	75	-0.0406419844973459	4	0	0	4
LOC105193220	44	Queen4	north_america	44	88	75	0	4	0	0	4
LOC105193220	10	43QT	south_america	14	24	75	0.447458976971221	4	0	0	4
LOC105193220	80	28W	south_america	227	307	75	1.49304001128012	4	0	0	4
LOC105193220	368	SBSb-virgin-queens-4	taiwan	214	582	75	-0.779284156470936	4	0	0	4
LOC105193220	43	112BQT	south_america	94	137	75	1.11042398969365	4	0	0	4
LOC105193220	59	43QA	south_america	121	180	75	1.02384674195437	4	0	0	4
LOC105193220	41	43CW	south_america	26	67	75	-0.637429920615292	4	0	0	4
LOC105193220	46	Queen2	north_america	46	92	75	0	4	0	0	4
LOC105193220	4	43QH	south_america	5	9	75	0.263034405833794	4	0	0	4
LOC105193220	4	3QH	south_america	4	8	75	0	4	0	0	4
LOC105193220	38	Queen3	north_america	40	78	75	0.0721497857558354	4	0	0	4
LOC105193220	14	3BW	south_america	14	28	75	0	4	0	0	4
LOC105193220	22	Queen1	north_america	10	32	75	-1.06413033741972	4	0	0	4
LOC105193220	93	3QA	south_america	74	167	75	-0.325770161181757	4	0	0	4
LOC105193223	7	Queen6	north_america	8	15	12.5	0.169925001442312	0	0	0	0
LOC105193223	10	Queen4	north_america	6	16	12.5	-0.652076696579693	0	0	0	0
LOC105193223	5	SBSb-virgin-queens-4	taiwan	2	7	12.5	-1	0	0	0	0
LOC105193223	7	Queen5	north_america	8	15	12.5	0.169925001442312	0	0	0	0
LOC105193223	4	SBSb-virgin-queens-1	taiwan	4	8	12.5	0	0	0	0	0
LOC105193223	12	Queen1	north_america	9	21	12.5	-0.37851162325373	0	0	0	0
LOC105193223	6	Queen2	north_america	8	14	12.5	0.362570079384708	0	0	0	0
LOC105193223	7	Queen3	north_america	4	11	12.5	-0.678071905112638	0	0	0	0
LOC105193223	6	SBSb-virgin-queens-3	taiwan	2	8	12.5	-1.22239242133645	0	0	0	0
LOC105193223	0	SBSb-virgin-queens-2	taiwan	3	3	12.5	2	0	0	0	0
LOC105193224	1	SBSb-virgin-queens-2	taiwan	3	4	10	1	0	0	0	0
LOC105193224	6	SBSb-virgin-queens-4	taiwan	6	12	10	0	0	0	0	0
LOC105193224	6	Queen4	north_america	4	10	10	-0.485426827170242	0	0	0	0
LOC105193224	5	Queen6	north_america	4	9	10	-0.263034405833794	0	0	0	0
LOC105193224	4	Queen3	north_america	4	8	10	0	0	0	0	0
LOC105193224	4	Queen1	north_america	6	10	10	0.485426827170242	0	0	0	0
LOC105193224	5	SBSb-virgin-queens-3	taiwan	2	7	10	-1	0	0	0	0
LOC105193224	6	Queen2	north_america	8	14	10	0.362570079384708	0	0	0	0
LOC105193224	6	Queen5	north_america	6	12	10	0	0	0	0	0
LOC105193224	5	SBSb-virgin-queens-1	taiwan	5	10	10	0	0	0	0	0
LOC105193228	14	112BQT	south_america	22	36	22.5	0.616671360448494	0	0	0	0
LOC105193228	6	Queen1	north_america	6	12	22.5	0	0	0	0	0
LOC105193228	12	3QA	south_america	8	20	22.5	-0.53051471669878	0	0	0	0
LOC105193228	6	112BQH	south_america	8	14	22.5	0.362570079384708	0	0	0	0
LOC105193228	24	111BQT	south_america	38	62	22.5	0.641546029087524	0	0	0	0
LOC105193228	16	28W	south_america	21	37	22.5	0.371968777386958	0	0	0	0
LOC105193228	4	3BW	south_america	2	6	22.5	-0.736965594166206	0	0	0	0
LOC105193228	10	114CQT	south_america	12	22	22.5	0.241008099503795	0	0	0	0
LOC105193228	8	118QH	south_america	19	27	22.5	1.15200309344505	0	0	0	0
LOC105193228	49	112BQA	south_america	44	93	22.5	-0.15200309344505	0	0	0	0
LOC105193228	14	3QT	south_america	16	30	22.5	0.180572245641821	0	0	0	0
LOC105193228	6	Queen2	north_america	12	18	22.5	0.893084796083488	0	0	0	0
LOC105193228	8	114CQH	south_america	6	14	22.5	-0.362570079384708	0	0	0	0
LOC105193228	2	Queen6	north_america	1	3	22.5	-0.584962500721156	0	0	0	0
LOC105193228	12	118QT	south_america	24	36	22.5	0.943416471633633	0	0	0	0
LOC105193228	4	111BQH	south_america	3	7	22.5	-0.321928094887362	0	0	0	0
LOC105193228	6	114W	south_america	9	15	22.5	0.514573172829758	0	0	0	0
LOC105193228	8	104W	south_america	17	25	22.5	1	0	0	0	0
LOC105193228	8	Queen5	north_america	15	23	22.5	0.830074998557688	0	0	0	0
LOC105193228	19	114CQA	south_america	26	45	22.5	0.432959407276106	0	0	0	0
LOC105193228	6	Queen3	north_america	8	14	22.5	0.362570079384708	0	0	0	0
LOC105193228	17	112W	south_america	20	37	22.5	0.222392421336448	0	0	0	0
LOC105193228	2	3QH	south_america	9	11	22.5	1.73696559416621	0	0	0	0
LOC105193228	7	118QA	south_america	19	26	22.5	1.32192809488736	0	0	0	0
LOC105193228	61	111BQA	south_america	54	115	22.5	-0.172836596862216	0	0	0	0
LOC105193228	15	43QA	south_america	12	27	22.5	-0.299560281858908	0	0	0	0
LOC105193228	6	Queen4	north_america	6	12	22.5	0	0	0	0	0
LOC105193228	15	43CW	south_america	10	25	22.5	-0.540568381362703	0	0	0	0
LOC105193228	8	SBSb-virgin-queens-2	taiwan	20	28	22.5	1.22239242133645	0	0	0	0
LOC105193228	2	43QH	south_america	4	6	22.5	0.736965594166206	0	0	0	0
LOC105193228	11	43QT	south_america	12	23	22.5	0.115477217419936	0	0	0	0
LOC105193228	4	SBSb-virgin-queens-3	taiwan	8	12	22.5	0.84799690655495	0	0	0	0
LOC105193228	6	SBSb-virgin-queens-1	taiwan	12	18	22.5	0.893084796083488	0	0	0	0
LOC105193228	6	SBSb-virgin-queens-4	taiwan	11	17	22.5	0.777607578663552	0	0	0	0
LOC105193229	4	112BQH	south_america	4	8	13	0	0	0	0	0
LOC105193229	4	3QA	south_america	3	7	13	-0.321928094887362	0	0	0	0
LOC105193229	4	43CW	south_america	5	9	13	0.263034405833794	0	0	0	0
LOC105193229	4	118QH	south_america	2	6	13	-0.736965594166206	0	0	0	0
LOC105193229	11	43QA	south_america	6	17	13	-0.777607578663552	0	0	0	0
LOC105193229	1	111BQH	south_america	1	2	13	0	0	0	0	0
LOC105193229	4	112W	south_america	8	12	13	0.84799690655495	0	0	0	0
LOC105193229	1	112BQT	south_america	1	2	13	0	0	0	0	0
LOC105193229	18	111BQA	south_america	11	29	13	-0.662965012722429	0	0	0	0
LOC105193229	16	SBSb-virgin-queens-4	taiwan	8	24	13	-0.917537839808027	0	0	0	0
LOC105193229	1	114CQT	south_america	2	3	13	0.584962500721156	0	0	0	0
LOC105193229	6	112BQA	south_america	9	15	13	0.514573172829758	0	0	0	0
LOC105193229	2	111BQT	south_america	2	4	13	0	0	0	0	0
LOC105193229	13	118QA	south_america	4	17	13	-1.48542682717024	0	0	0	0
LOC105193229	8	104W	south_america	11	19	13	0.415037499278844	0	0	0	0
LOC105193229	0	3BW	south_america	2	2	13	1.58496250072116	0	0	0	0
LOC105193229	11	28W	south_america	9	20	13	-0.263034405833794	0	0	0	0
LOC105193229	10	Queen6	north_america	7	17	13	-0.459431618637297	0	0	0	0
LOC105193229	1	43QH	south_america	2	3	13	0.584962500721156	0	0	0	0
LOC105193229	6	118QT	south_america	3	9	13	-0.807354922057604	0	0	0	0
LOC105193229	19	114CQA	south_america	21	40	13	0.137503523749935	0	0	0	0
LOC105193229	7	114W	south_america	7	14	13	0	0	0	0	0
LOC105193229	3	114CQH	south_america	3	6	13	0	0	0	0	0
LOC105193229	4	43QT	south_america	2	6	13	-0.736965594166206	0	0	0	0
LOC105193229	1	3QH	south_america	3	4	13	1	0	0	0	0
LOC105193229	10	Queen1	north_america	9	19	13	-0.137503523749935	0	0	0	0
LOC105193229	8	Queen3	north_america	8	16	13	0	0	0	0	0
LOC105193229	15	Queen2	north_america	15	30	13	0	0	0	0	0
LOC105193229	10	SBSb-virgin-queens-1	taiwan	7	17	13	-0.459431618637297	0	0	0	0
LOC105193229	1	3QT	south_america	2	3	13	0.584962500721156	0	0	0	0
LOC105193229	14	SBSb-virgin-queens-3	taiwan	13	27	13	-0.0995356735509144	0	0	0	0
LOC105193229	8	Queen4	north_america	7	15	13	-0.169925001442312	0	0	0	0
LOC105193229	18	SBSb-virgin-queens-2	taiwan	12	30	13	-0.547487795302493	0	0	0	0
LOC105193229	5	Queen5	north_america	6	11	13	0.222392421336448	0	0	0	0
LOC105193230	2	114CQT	south_america	2	4	12.5	0	0	0	0	0
LOC105193230	7	28W	south_america	8	15	12.5	0.169925001442312	0	0	0	0
LOC105193230	4	3QT	south_america	4	8	12.5	0	0	0	0	0
LOC105193230	10	118QA	south_america	3	13	12.5	-1.4594316186373	0	0	0	0
LOC105193230	10	Queen3	north_america	8	18	12.5	-0.289506617194985	0	0	0	0
LOC105193230	7	SBSb-virgin-queens-1	taiwan	4	11	12.5	-0.678071905112638	0	0	0	0
LOC105193230	4	114W	south_america	3	7	12.5	-0.321928094887362	0	0	0	0
LOC105193230	1	3QH	south_america	2	3	12.5	0.584962500721156	0	0	0	0
LOC105193230	10	Queen1	north_america	9	19	12.5	-0.137503523749935	0	0	0	0
LOC105193230	9	104W	south_america	11	20	12.5	0.263034405833794	0	0	0	0
LOC105193230	3	118QH	south_america	2	5	12.5	-0.415037499278844	0	0	0	0
LOC105193230	3	114CQH	south_america	3	6	12.5	0	0	0	0	0
LOC105193230	9	Queen6	north_america	6	15	12.5	-0.514573172829758	0	0	0	0
LOC105193230	8	118QT	south_america	4	12	12.5	-0.84799690655495	0	0	0	0
LOC105193230	6	112BQA	south_america	9	15	12.5	0.514573172829758	0	0	0	0
LOC105193230	11	Queen4	north_america	7	18	12.5	-0.584962500721156	0	0	0	0
LOC105193230	1	112BQT	south_america	2	3	12.5	0.584962500721156	0	0	0	0
LOC105193230	4	SBSb-virgin-queens-2	taiwan	4	8	12.5	0	0	0	0	0
LOC105193230	4	43CW	south_america	5	9	12.5	0.263034405833794	0	0	0	0
LOC105193230	8	43QA	south_america	5	13	12.5	-0.584962500721156	0	0	0	0
LOC105193230	14	Queen2	north_america	15	29	12.5	0.0931094043914815	0	0	0	0
LOC105193230	1	3BW	south_america	2	3	12.5	0.584962500721156	0	0	0	0
LOC105193230	1	43QH	south_america	2	3	12.5	0.584962500721156	0	0	0	0
LOC105193230	2	111BQH	south_america	1	3	12.5	-0.584962500721156	0	0	0	0
LOC105193230	9	114CQA	south_america	12	21	12.5	0.37851162325373	0	0	0	0
LOC105193230	7	3QA	south_america	6	13	12.5	-0.192645077942396	0	0	0	0
LOC105193230	3	111BQT	south_america	6	9	12.5	0.807354922057604	0	0	0	0
LOC105193230	6	112W	south_america	7	13	12.5	0.192645077942396	0	0	0	0
LOC105193230	12	111BQA	south_america	10	22	12.5	-0.241008099503795	0	0	0	0
LOC105193230	6	Queen5	north_america	8	14	12.5	0.362570079384708	0	0	0	0
LOC105193230	4	43QT	south_america	3	7	12.5	-0.321928094887362	0	0	0	0
LOC105193230	0	112BQH	south_america	1	1	12.5	1	0	0	0	0
LOC105193230	10	SBSb-virgin-queens-3	taiwan	7	17	12.5	-0.459431618637297	0	0	0	0
LOC105193230	14	SBSb-virgin-queens-4	taiwan	8	22	12.5	-0.736965594166206	0	0	0	0
LOC105193812	1	3QT	south_america	4	5	10	1.32192809488736	1	0	0	1
LOC105193812	2	3QH	south_america	2	4	10	0	1	0	0	1
LOC105193812	12	Queen1	north_america	12	24	10	0	1	0	0	1
LOC105193812	6	SBSb-virgin-queens-3	taiwan	10	16	10	0.652076696579693	1	0	0	1
LOC105193812	2	Queen4	north_america	8	10	10	1.58496250072116	1	0	0	1
LOC105193812	2	3QA	south_america	8	10	10	1.58496250072116	1	0	0	1
LOC105193812	6	Queen5	north_america	9	15	10	0.514573172829758	1	0	0	1
LOC105193812	3	SBSb-virgin-queens-4	taiwan	6	9	10	0.807354922057604	1	0	0	1
LOC105193812	4	Queen6	north_america	7	11	10	0.678071905112638	1	0	0	1
LOC105193812	4	Queen3	north_america	5	9	10	0.263034405833794	1	0	0	1
LOC105193812	4	28W	south_america	5	9	10	0.263034405833794	1	0	0	1
LOC105193812	0	3BW	south_america	1	1	10	1	1	0	0	1
LOC105193812	11	111BQT	south_america	9	20	10	-0.263034405833794	1	0	0	1
LOC105193812	0	43QH	south_america	1	1	10	1	1	0	0	1
LOC105193812	4	43QT	south_america	3	7	10	-0.321928094887362	1	0	0	1
LOC105193812	2	Queen2	north_america	4	6	10	0.736965594166206	1	0	0	1
LOC105193812	4	112BQH	south_america	3	7	10	-0.321928094887362	1	0	0	1
LOC105193812	24	111BQA	south_america	28	52	10	0.214124805352847	1	0	0	1
LOC105193812	7	104W	south_america	6	13	10	-0.192645077942396	1	0	0	1
LOC105193812	6	SBSb-virgin-queens-2	taiwan	10	16	10	0.652076696579693	1	0	0	1
LOC105193812	10	118QT	south_america	5	15	10	-0.874469117916141	1	0	0	1
LOC105193812	3	SBSb-virgin-queens-1	taiwan	9	12	10	1.32192809488736	1	0	0	1
LOC105193812	8	114CQA	south_america	7	15	10	-0.169925001442312	1	0	0	1
LOC105193812	2	118QH	south_america	2	4	10	0	1	0	0	1
LOC105193812	4	111BQH	south_america	1	5	10	-1.32192809488736	1	0	0	1
LOC105193812	13	118QA	south_america	8	21	10	-0.637429920615292	1	0	0	1
LOC105193812	2	114W	south_america	3	5	10	0.415037499278844	1	0	0	1
LOC105193812	0	112BQA	south_america	0	0	10	0	1	0	0	1
LOC105193812	4	43QA	south_america	10	14	10	1.13750352374994	1	0	0	1
LOC105193812	2	114CQT	south_america	4	6	10	0.736965594166206	1	0	0	1
LOC105193812	9	112W	south_america	8	17	10	-0.15200309344505	1	0	0	1
LOC105193812	6	114CQH	south_america	4	10	10	-0.485426827170242	1	0	0	1
LOC105193812	2	43CW	south_america	6	8	10	1.22239242133645	1	0	0	1
LOC105193812	6	112BQT	south_america	14	20	10	1.09953567355091	1	0	0	1
LOC105193814	45	SBSb-virgin-queens-2	taiwan	48	93	19	0.0911478880581954	0	0	0	0
LOC105193814	10	Queen2	north_america	9	19	19	-0.137503523749935	0	0	0	0
LOC105193814	46	SBSb-virgin-queens-4	taiwan	40	86	19	-0.197036847059554	0	0	0	0
LOC105193814	54	SBSb-virgin-queens-3	taiwan	46	100	19	-0.226770861847022	0	0	0	0
LOC105193814	5	Queen5	north_america	6	11	19	0.222392421336448	0	0	0	0
LOC105193814	8	Queen1	north_america	6	14	19	-0.362570079384708	0	0	0	0
LOC105193814	74	SBSb-virgin-queens-1	taiwan	74	148	19	0	0	0	0	0
LOC105193814	13	Queen6	north_america	6	19	19	-1	0	0	0	0
LOC105193814	5	Queen3	north_america	6	11	19	0.222392421336448	0	0	0	0
LOC105193814	6	Queen4	north_america	7	13	19	0.192645077942396	0	0	0	0
LOC105193815	5	3QT	south_america	4	9	25	-0.263034405833794	0	0	0	0
LOC105193815	34	43QT	south_america	39	73	25	0.192645077942396	0	0	0	0
LOC105193815	59	118QT	south_america	46	105	25	-0.352301743930881	0	0	0	0
LOC105193815	8	Queen1	north_america	9	17	25	0.15200309344505	0	0	0	0
LOC105193815	22	111BQT	south_america	54	76	25	1.25779775746765	0	0	0	0
LOC105193815	50	SBSb-virgin-queens-1	taiwan	40	90	25	-0.314873337353412	0	0	0	0
LOC105193815	9	Queen4	north_america	16	25	25	0.765534746362977	0	0	0	0
LOC105193815	4	43QH	south_america	1	5	25	-1.32192809488736	0	0	0	0
LOC105193815	13	28W	south_america	13	26	25	0	0	0	0	0
LOC105193815	2	3BW	south_america	2	4	25	0	0	0	0	0
LOC105193815	4	111BQH	south_america	4	8	25	0	0	0	0	0
LOC105193815	17	Queen6	north_america	19	36	25	0.15200309344505	0	0	0	0
LOC105193815	14	Queen5	north_america	16	30	25	0.180572245641821	0	0	0	0
LOC105193815	20	111BQA	south_america	30	50	25	0.561878887608115	0	0	0	0
LOC105193815	23	114CQT	south_america	19	42	25	-0.263034405833794	0	0	0	0
LOC105193815	14	114CQA	south_america	11	25	25	-0.321928094887362	0	0	0	0
LOC105193815	8	114W	south_america	6	14	25	-0.362570079384708	0	0	0	0
LOC105193815	2	112W	south_america	19	21	25	2.73696559416621	0	0	0	0
LOC105193815	8	104W	south_america	14	22	25	0.736965594166206	0	0	0	0
LOC105193815	7	43CW	south_america	8	15	25	0.169925001442312	0	0	0	0
LOC105193815	14	SBSb-virgin-queens-4	taiwan	18	32	25	0.341036917835067	0	0	0	0
LOC105193815	7	118QH	south_america	6	13	25	-0.192645077942396	0	0	0	0
LOC105193815	10	118QA	south_america	15	25	25	0.540568381362703	0	0	0	0
LOC105193815	16	112BQT	south_america	19	35	25	0.234465253637023	0	0	0	0
LOC105193815	12	Queen2	north_america	16	28	25	0.387023123109247	0	0	0	0
LOC105193815	6	43QA	south_america	17	23	25	1.36257007938471	0	0	0	0
LOC105193815	38	SBSb-virgin-queens-3	taiwan	31	69	25	-0.285402218862248	0	0	0	0
LOC105193815	15	Queen3	north_america	12	27	25	-0.299560281858908	0	0	0	0
LOC105193815	8	114CQH	south_america	2	10	25	-1.58496250072116	0	0	0	0
LOC105193815	1	112BQH	south_america	3	4	25	1	0	0	0	0
LOC105193815	37	SBSb-virgin-queens-2	taiwan	46	83	25	0.306661338234052	0	0	0	0
LOC105193815	3	3QA	south_america	8	11	25	1.16992500144231	0	0	0	0
LOC105193815	0	112BQA	south_america	0	0	25	0	0	0	0	0
LOC105193815	1	3QH	south_america	4	5	25	1.32192809488736	0	0	0	0
LOC105193816	1	SBSb-virgin-queens-1	taiwan	1	2	6.5	0	0	0	0	0
LOC105193816	3	Queen2	north_america	3	6	6.5	0	0	0	0	0
LOC105193816	0	SBSb-virgin-queens-2	taiwan	2	2	6.5	1.58496250072116	0	0	0	0
LOC105193816	0	SBSb-virgin-queens-4	taiwan	2	2	6.5	1.58496250072116	0	0	0	0
LOC105193816	2	Queen4	north_america	3	5	6.5	0.415037499278844	0	0	0	0
LOC105193816	5	SBSb-virgin-queens-3	taiwan	9	14	6.5	0.736965594166206	0	0	0	0
LOC105193816	4	Queen1	north_america	4	8	6.5	0	0	0	0	0
LOC105193816	2	Queen5	north_america	5	7	6.5	1	0	0	0	0
LOC105193816	5	Queen3	north_america	4	9	6.5	-0.263034405833794	0	0	0	0
LOC105193816	4	Queen6	north_america	4	8	6.5	0	0	0	0	0
LOC105193827	5	43QA	south_america	10	15	11	0.874469117916141	0	0	0	0
LOC105193827	2	3BW	south_america	0	2	11	-1.58496250072116	0	0	0	0
LOC105193827	6	114CQH	south_america	2	8	11	-1.22239242133645	0	0	0	0
LOC105193827	3	43CW	south_america	2	5	11	-0.415037499278844	0	0	0	0
LOC105193827	19	111BQA	south_america	25	44	11	0.37851162325373	0	0	0	0
LOC105193827	20	3QT	south_america	16	36	11	-0.304854581528421	0	0	0	0
LOC105193827	21	Queen3	north_america	24	45	11	0.184424571137428	0	0	0	0
LOC105193827	7	Queen1	north_america	7	14	11	0	0	0	0	0
LOC105193827	9	118QT	south_america	9	18	11	0	0	0	0	0
LOC105193827	2	SBSb-virgin-queens-1	taiwan	7	9	11	1.41503749927884	0	0	0	0
LOC105193827	4	118QA	south_america	4	8	11	0	0	0	0	0
LOC105193827	4	Queen2	north_america	9	13	11	1	0	0	0	0
LOC105193827	10	Queen5	north_america	10	20	11	0	0	0	0	0
LOC105193827	16	SBSb-virgin-queens-4	taiwan	16	32	11	0	0	0	0	0
LOC105193827	7	28W	south_america	7	14	11	0	0	0	0	0
LOC105193827	4	104W	south_america	6	10	11	0.485426827170242	0	0	0	0
LOC105193827	8	Queen6	north_america	8	16	11	0	0	0	0	0
LOC105193827	1	118QH	south_america	2	3	11	0.584962500721156	0	0	0	0
LOC105193827	0	43QH	south_america	0	0	11	0	0	0	0	0
LOC105193827	10	SBSb-virgin-queens-2	taiwan	10	20	11	0	0	0	0	0
LOC105193827	7	114W	south_america	7	14	11	0	0	0	0	0
LOC105193827	4	Queen4	north_america	8	12	11	0.84799690655495	0	0	0	0
LOC105193827	3	112BQH	south_america	0	3	11	-2	0	0	0	0
LOC105193827	0	111BQH	south_america	0	0	11	0	0	0	0	0
LOC105193827	4	43QT	south_america	4	8	11	0	0	0	0	0
LOC105193827	2	112W	south_america	4	6	11	0.736965594166206	0	0	0	0
LOC105193827	8	SBSb-virgin-queens-3	taiwan	6	14	11	-0.362570079384708	0	0	0	0
LOC105193827	10	114CQT	south_america	3	13	11	-1.4594316186373	0	0	0	0
LOC105193827	4	112BQT	south_america	4	8	11	0	0	0	0	0
LOC105193827	0	3QH	south_america	0	0	11	0	0	0	0	0
LOC105193827	0	112BQA	south_america	0	0	11	0	0	0	0	0
LOC105193827	2	111BQT	south_america	4	6	11	0.736965594166206	0	0	0	0
LOC105193827	10	3QA	south_america	13	23	11	0.347923303420307	0	0	0	0
LOC105193827	4	114CQA	south_america	5	9	11	0.263034405833794	0	0	0	0
LOC105193829	1	114CQT	south_america	2	3	9.5	0.584962500721156	1	0	0	1
LOC105193829	23	SBSb-virgin-queens-2	taiwan	33	56	9.5	0.502500340529183	1	0	0	1
LOC105193829	15	Queen2	north_america	16	31	9.5	0.0874628412503394	1	0	0	1
LOC105193829	2	43QT	south_america	1	3	9.5	-0.584962500721156	1	0	0	1
LOC105193829	0	114W	south_america	1	1	9.5	1	1	0	0	1
LOC105193829	6	114CQA	south_america	4	10	9.5	-0.485426827170242	1	0	0	1
LOC105193829	2	112W	south_america	3	5	9.5	0.415037499278844	1	0	0	1
LOC105193829	10	3QT	south_america	8	18	9.5	-0.289506617194985	1	0	0	1
LOC105193829	2	43QH	south_america	0	2	9.5	-1.58496250072116	1	0	0	1
LOC105193829	4	43QA	south_america	6	10	9.5	0.485426827170242	1	0	0	1
LOC105193829	2	43CW	south_america	1	3	9.5	-0.584962500721156	1	0	0	1
LOC105193829	1	112BQH	south_america	2	3	9.5	0.584962500721156	1	0	0	1
LOC105193829	6	Queen5	north_america	10	16	9.5	0.652076696579693	1	0	0	1
LOC105193829	4	111BQT	south_america	7	11	9.5	0.678071905112638	1	0	0	1
LOC105193829	0	112BQA	south_america	0	0	9.5	0	1	0	0	1
LOC105193829	20	28W	south_america	4	24	9.5	-2.0703893278914	1	0	0	1
LOC105193829	10	Queen6	north_america	14	24	9.5	0.447458976971221	1	0	0	1
LOC105193829	0	114CQH	south_america	1	1	9.5	1	1	0	0	1
LOC105193829	24	SBSb-virgin-queens-4	taiwan	32	56	9.5	0.400537929583729	1	0	0	1
LOC105193829	1	3QH	south_america	0	1	9.5	-1	1	0	0	1
LOC105193829	2	118QT	south_america	2	4	9.5	0	1	0	0	1
LOC105193829	11	Queen4	north_america	15	26	9.5	0.415037499278844	1	0	0	1
LOC105193829	13	Queen1	north_america	13	26	9.5	0	1	0	0	1
LOC105193829	27	111BQA	south_america	37	64	9.5	0.440572591385981	1	0	0	1
LOC105193829	2	3BW	south_america	0	2	9.5	-1.58496250072116	1	0	0	1
LOC105193829	1	104W	south_america	1	2	9.5	0	1	0	0	1
LOC105193829	17	SBSb-virgin-queens-1	taiwan	31	48	9.5	0.830074998557688	1	0	0	1
LOC105193829	1	112BQT	south_america	2	3	9.5	0.584962500721156	1	0	0	1
LOC105193829	2	111BQH	south_america	0	2	9.5	-1.58496250072116	1	0	0	1
LOC105193829	6	3QA	south_america	3	9	9.5	-0.807354922057604	1	0	0	1
LOC105193829	15	Queen3	north_america	16	31	9.5	0.0874628412503394	1	0	0	1
LOC105193829	1	118QH	south_america	2	3	9.5	0.584962500721156	1	0	0	1
LOC105193829	18	SBSb-virgin-queens-3	taiwan	29	47	9.5	0.658963082164933	1	0	0	1
LOC105193829	4	118QA	south_america	7	11	9.5	0.678071905112638	1	0	0	1
LOC105193830	4	Queen5	north_america	7	11	6	0.678071905112638	1	0	0	1
LOC105193830	10	43QT	south_america	1	11	6	-2.4594316186373	1	0	0	1
LOC105193830	9	SBSb-virgin-queens-1	taiwan	9	18	6	0	1	0	0	1
LOC105193830	4	114CQA	south_america	2	6	6	-0.736965594166206	1	0	0	1
LOC105193830	2	112W	south_america	0	2	6	-1.58496250072116	1	0	0	1
LOC105193830	8	SBSb-virgin-queens-2	taiwan	14	22	6	0.736965594166206	1	0	0	1
LOC105193830	4	SBSb-virgin-queens-3	taiwan	7	11	6	0.678071905112638	1	0	0	1
LOC105193830	4	Queen2	north_america	6	10	6	0.485426827170242	1	0	0	1
LOC105193830	1	43QH	south_america	0	1	6	-1	1	0	0	1
LOC105193830	2	114CQT	south_america	1	3	6	-0.584962500721156	1	0	0	1
LOC105193830	8	SBSb-virgin-queens-4	taiwan	10	18	6	0.289506617194985	1	0	0	1
LOC105193830	4	Queen4	north_america	2	6	6	-0.736965594166206	1	0	0	1
LOC105193830	3	112BQT	south_america	3	6	6	0	1	0	0	1
LOC105193830	3	Queen3	north_america	3	6	6	0	1	0	0	1
LOC105193830	1	3BW	south_america	0	1	6	-1	1	0	0	1
LOC105193830	3	Queen6	north_america	2	5	6	-0.415037499278844	1	0	0	1
LOC105193830	3	43QA	south_america	3	6	6	0	1	0	0	1
LOC105193830	4	43CW	south_america	2	6	6	-0.736965594166206	1	0	0	1
LOC105193830	0	111BQH	south_america	0	0	6	0	1	0	0	1
LOC105193830	8	111BQA	south_america	8	16	6	0	1	0	0	1
LOC105193830	4	104W	south_america	2	6	6	-0.736965594166206	1	0	0	1
LOC105193830	3	Queen1	north_america	5	8	6	0.584962500721156	1	0	0	1
LOC105193830	1	112BQH	south_america	1	2	6	0	1	0	0	1
LOC105193830	2	114CQH	south_america	0	2	6	-1.58496250072116	1	0	0	1
LOC105193830	1	3QH	south_america	1	2	6	0	1	0	0	1
LOC105193830	2	3QT	south_america	6	8	6	1.22239242133645	1	0	0	1
LOC105193830	4	3QA	south_america	2	6	6	-0.736965594166206	1	0	0	1
LOC105193830	4	118QT	south_america	2	6	6	-0.736965594166206	1	0	0	1
LOC105193830	4	111BQT	south_america	3	7	6	-0.321928094887362	1	0	0	1
LOC105193830	2	118QH	south_america	2	4	6	0	1	0	0	1
LOC105193830	0	112BQA	south_america	0	0	6	0	1	0	0	1
LOC105193830	2	114W	south_america	1	3	6	-0.584962500721156	1	0	0	1
LOC105193830	3	28W	south_america	2	5	6	-0.415037499278844	1	0	0	1
LOC105193830	4	118QA	south_america	1	5	6	-1.32192809488736	1	0	0	1
LOC105193831	10	Queen5	north_america	40	50	67.5	1.89812038598079	0	0	0	0
LOC105193831	22	Queen3	north_america	43	65	67.5	0.935869662580284	0	0	0	0
LOC105193831	24	Queen2	north_america	32	56	67.5	0.400537929583729	0	0	0	0
LOC105193831	46	SBSb-virgin-queens-2	taiwan	93	139	67.5	1	0	0	0	0
LOC105193831	46	SBSb-virgin-queens-4	taiwan	84	130	67.5	0.854802084460064	0	0	0	0
LOC105193831	34	SBSb-virgin-queens-3	taiwan	58	92	67.5	0.753360032416875	0	0	0	0
LOC105193831	48	SBSb-virgin-queens-1	taiwan	105	153	67.5	1.11321061044799	0	0	0	0
LOC105193831	17	Queen4	north_america	37	54	67.5	1.07800251200127	0	0	0	0
LOC105193831	21	Queen6	north_america	38	59	67.5	0.825970600224951	0	0	0	0
LOC105193831	29	Queen1	north_america	41	70	67.5	0.485426827170242	0	0	0	0
LOC105193832	2	114CQA	south_america	7	9	10	1.41503749927884	0	0	0	0
LOC105193832	6	Queen4	north_america	6	12	10	0	0	0	0	0
LOC105193832	6	3QA	south_america	1	7	10	-1.8073549220576	0	0	0	0
LOC105193832	6	Queen6	north_america	4	10	10	-0.485426827170242	0	0	0	0
LOC105193832	10	43QA	south_america	2	12	10	-1.87446911791614	0	0	0	0
LOC105193832	0	112BQA	south_america	0	0	10	0	0	0	0	0
LOC105193832	8	43QT	south_america	2	10	10	-1.58496250072116	0	0	0	0
LOC105193832	6	Queen5	north_america	4	10	10	-0.485426827170242	0	0	0	0
LOC105193832	10	Queen2	north_america	2	12	10	-1.87446911791614	0	0	0	0
LOC105193832	6	43CW	south_america	0	6	10	-2.8073549220576	0	0	0	0
LOC105193832	19	SBSb-virgin-queens-3	taiwan	3	22	10	-2.32192809488736	0	0	0	0
LOC105193832	6	112BQT	south_america	6	12	10	0	0	0	0	0
LOC105193832	1	43QH	south_america	0	1	10	-1	0	0	0	0
LOC105193832	8	111BQT	south_america	5	13	10	-0.584962500721156	0	0	0	0
LOC105193832	1	3BW	south_america	0	1	10	-1	0	0	0	0
LOC105193832	15	SBSb-virgin-queens-1	taiwan	4	19	10	-1.67807190511264	0	0	0	0
LOC105193832	4	112W	south_america	2	6	10	-0.736965594166206	0	0	0	0
LOC105193832	1	114CQH	south_america	0	1	10	-1	0	0	0	0
LOC105193832	6	Queen1	north_america	4	10	10	-0.485426827170242	0	0	0	0
LOC105193832	10	Queen3	north_america	6	16	10	-0.652076696579693	0	0	0	0
LOC105193832	2	118QH	south_america	2	4	10	0	0	0	0	0
LOC105193832	2	112BQH	south_america	0	2	10	-1.58496250072116	0	0	0	0
LOC105193832	2	3QH	south_america	0	2	10	-1.58496250072116	0	0	0	0
LOC105193832	2	118QT	south_america	8	10	10	1.58496250072116	0	0	0	0
LOC105193832	12	104W	south_america	2	14	10	-2.11547721741994	0	0	0	0
LOC105193832	4	118QA	south_america	5	9	10	0.263034405833794	0	0	0	0
LOC105193832	20	SBSb-virgin-queens-4	taiwan	13	33	10	-0.584962500721156	0	0	0	0
LOC105193832	25	SBSb-virgin-queens-2	taiwan	10	35	10	-1.24100809950379	0	0	0	0
LOC105193832	16	111BQA	south_america	16	32	10	0	0	0	0	0
LOC105193832	6	3QT	south_america	5	11	10	-0.222392421336448	0	0	0	0
LOC105193832	2	114CQT	south_america	2	4	10	0	0	0	0	0
LOC105193832	4	28W	south_america	5	9	10	0.263034405833794	0	0	0	0
LOC105193832	2	111BQH	south_america	0	2	10	-1.58496250072116	0	0	0	0
LOC105193832	2	114W	south_america	2	4	10	0	0	0	0	0
LOC105193834	32	SBSb-virgin-queens-2	taiwan	51	83	6.5	0.656045598782639	0	0	0	0
LOC105193834	1	3QH	south_america	0	1	6.5	-1	0	0	0	0
LOC105193834	10	Queen5	north_america	12	22	6.5	0.241008099503795	0	0	0	0
LOC105193834	10	Queen2	north_america	5	15	6.5	-0.874469117916141	0	0	0	0
LOC105193834	19	SBSb-virgin-queens-4	taiwan	54	73	6.5	1.4594316186373	0	0	0	0
LOC105193834	24	SBSb-virgin-queens-1	taiwan	44	68	6.5	0.84799690655495	0	0	0	0
LOC105193834	3	104W	south_america	1	4	6.5	-1	0	0	0	0
LOC105193834	2	118QT	south_america	3	5	6.5	0.415037499278844	0	0	0	0
LOC105193834	10	111BQT	south_america	5	15	6.5	-0.874469117916141	0	0	0	0
LOC105193834	0	28W	south_america	2	2	6.5	1.58496250072116	0	0	0	0
LOC105193834	4	3QA	south_america	3	7	6.5	-0.321928094887362	0	0	0	0
LOC105193834	10	Queen4	north_america	10	20	6.5	0	0	0	0	0
LOC105193834	29	SBSb-virgin-queens-3	taiwan	40	69	6.5	0.450661409009565	0	0	0	0
LOC105193834	2	112W	south_america	4	6	6.5	0.736965594166206	0	0	0	0
LOC105193834	11	Queen3	north_america	5	16	6.5	-1	0	0	0	0
LOC105193834	8	Queen6	north_america	12	20	6.5	0.53051471669878	0	0	0	0
LOC105193834	0	112BQA	south_america	0	0	6.5	0	0	0	0	0
LOC105193834	1	43QT	south_america	1	2	6.5	0	0	0	0	0
LOC105193834	5	43QA	south_america	2	7	6.5	-1	0	0	0	0
LOC105193834	2	118QA	south_america	2	4	6.5	0	0	0	0	0
LOC105193834	12	Queen1	north_america	15	27	6.5	0.299560281858908	0	0	0	0
LOC105193834	0	111BQH	south_america	1	1	6.5	1	0	0	0	0
LOC105193834	2	43CW	south_america	8	10	6.5	1.58496250072116	0	0	0	0
LOC105193834	1	3QT	south_america	1	2	6.5	0	0	0	0	0
LOC105193834	0	114CQT	south_america	2	2	6.5	1.58496250072116	0	0	0	0
LOC105193834	0	114CQH	south_america	1	1	6.5	1	0	0	0	0
LOC105193834	5	114CQA	south_america	4	9	6.5	-0.263034405833794	0	0	0	0
LOC105193834	6	111BQA	south_america	8	14	6.5	0.362570079384708	0	0	0	0
LOC105193834	1	118QH	south_america	2	3	6.5	0.584962500721156	0	0	0	0
LOC105193834	3	112BQH	south_america	2	5	6.5	-0.415037499278844	0	0	0	0
LOC105193834	0	3BW	south_america	0	0	6.5	0	0	0	0	0
LOC105193834	1	112BQT	south_america	4	5	6.5	1.32192809488736	0	0	0	0
LOC105193834	4	114W	south_america	3	7	6.5	-0.321928094887362	0	0	0	0
LOC105193834	0	43QH	south_america	0	0	6.5	0	0	0	0	0
LOC105193835	9	Queen1	north_america	10	19	11	0.137503523749935	0	0	0	0
LOC105193835	7	Queen5	north_america	4	11	11	-0.678071905112638	0	0	0	0
LOC105193835	0	Queen2	north_america	1	1	11	1	0	0	0	0
LOC105193835	4	Queen6	north_america	7	11	11	0.678071905112638	0	0	0	0
LOC105193835	1	SBSb-virgin-queens-1	taiwan	1	2	11	0	0	0	0	0
LOC105193835	2	Queen4	north_america	8	10	11	1.58496250072116	0	0	0	0
LOC105193835	18	SBSb-virgin-queens-3	taiwan	19	37	11	0.0740005814437768	0	0	0	0
LOC105193835	9	Queen3	north_america	5	14	11	-0.736965594166206	0	0	0	0
LOC105193835	8	SBSb-virgin-queens-4	taiwan	8	16	11	0	0	0	0	0
LOC105193835	0	SBSb-virgin-queens-2	taiwan	2	2	11	1.58496250072116	0	0	0	0
LOC105193871	15	111BQH	south_america	11	26	30.5	-0.415037499278844	0	0	0	0
LOC105193871	15	Queen1	north_america	15	30	30.5	0	0	0	0	0
LOC105193871	0	112BQA	south_america	0	0	30.5	0	0	0	0	0
LOC105193871	14	Queen6	north_america	10	24	30.5	-0.447458976971221	0	0	0	0
LOC105193871	9	Queen4	north_america	11	20	30.5	0.263034405833794	0	0	0	0
LOC105193871	16	Queen2	north_america	16	32	30.5	0	0	0	0	0
LOC105193871	22	28W	south_america	20	42	30.5	-0.131244533278253	0	0	0	0
LOC105193871	8	Queen5	north_america	14	22	30.5	0.736965594166206	0	0	0	0
LOC105193871	14	118QT	south_america	12	26	30.5	-0.206450877467426	0	0	0	0
LOC105193871	14	43CW	south_america	15	29	30.5	0.0931094043914815	0	0	0	0
LOC105193871	17	118QH	south_america	14	31	30.5	-0.263034405833794	0	0	0	0
LOC105193871	8	3QH	south_america	12	20	30.5	0.53051471669878	0	0	0	0
LOC105193871	7	Queen3	north_america	11	18	30.5	0.584962500721156	0	0	0	0
LOC105193871	12	112BQT	south_america	13	25	30.5	0.106915203916512	0	0	0	0
LOC105193871	36	SBSb-virgin-queens-1	taiwan	36	72	30.5	0	0	0	0	0
LOC105193871	17	114CQT	south_america	11	28	30.5	-0.584962500721156	0	0	0	0
LOC105193871	8	3BW	south_america	4	12	30.5	-0.84799690655495	0	0	0	0
LOC105193871	28	118QA	south_america	32	60	30.5	0.186413124230881	0	0	0	0
LOC105193871	104	111BQA	south_america	98	202	30.5	-0.0848888975865131	0	0	0	0
LOC105193871	35	104W	south_america	28	63	30.5	-0.31194400631474	0	0	0	0
LOC105193871	26	3QT	south_america	25	51	30.5	-0.0544477840223765	0	0	0	0
LOC105193871	16	112BQH	south_america	9	25	30.5	-0.765534746362977	0	0	0	0
LOC105193871	38	114CQA	south_america	35	73	30.5	-0.115477217419936	0	0	0	0
LOC105193871	11	43QH	south_america	8	19	30.5	-0.415037499278844	0	0	0	0
LOC105193871	47	SBSb-virgin-queens-3	taiwan	35	82	30.5	-0.415037499278844	0	0	0	0
LOC105193871	16	114CQH	south_america	10	26	30.5	-0.628031222613042	0	0	0	0
LOC105193871	46	111BQT	south_america	37	83	30.5	-0.306661338234052	0	0	0	0
LOC105193871	36	SBSb-virgin-queens-4	taiwan	32	68	30.5	-0.165059246270496	0	0	0	0
LOC105193871	22	114W	south_america	11	33	30.5	-0.938599455335857	0	0	0	0
LOC105193871	38	SBSb-virgin-queens-2	taiwan	35	73	30.5	-0.115477217419936	0	0	0	0
LOC105193871	13	43QT	south_america	10	23	30.5	-0.347923303420307	0	0	0	0
LOC105193871	36	43QA	south_america	30	66	30.5	-0.255257055242075	0	0	0	0
LOC105193871	29	112W	south_america	28	57	30.5	-0.0489096004809464	0	0	0	0
LOC105193871	26	3QA	south_america	22	48	30.5	-0.231325546106456	0	0	0	0
LOC105194381	1	114CQA	south_america	0	1	24	-1	0	0	0	0
LOC105194381	53	SBSb-virgin-queens-4	taiwan	46	99	24	-0.200298650485831	0	0	0	0
LOC105194381	50	SBSb-virgin-queens-3	taiwan	45	95	24	-0.148863385914483	0	0	0	0
LOC105194381	1	3BW	south_america	1	2	24	0	0	0	0	0
LOC105194381	78	SBSb-virgin-queens-2	taiwan	22	100	24	-1.78021879212009	0	0	0	0
LOC105194381	9	3QA	south_america	16	25	24	0.765534746362977	0	0	0	0
LOC105194381	25	112BQT	south_america	40	65	24	0.657112286476991	0	0	0	0
LOC105194381	7	112BQH	south_america	12	19	24	0.700439718141092	0	0	0	0
LOC105194381	0	43QT	south_america	21	21	24	4.4594316186373	0	0	0	0
LOC105194381	0	43QH	south_america	3	3	24	2	0	0	0	0
LOC105194381	0	3QT	south_america	1	1	24	1	0	0	0	0
LOC105194381	12	Queen1	north_america	7	19	24	-0.700439718141092	0	0	0	0
LOC105194381	63	SBSb-virgin-queens-1	taiwan	21	84	24	-1.5405683813627	0	0	0	0
LOC105194381	14	Queen3	north_america	11	25	24	-0.321928094887362	0	0	0	0
LOC105194381	0	43QA	south_america	40	40	24	5.35755200461808	0	0	0	0
LOC105194381	7	3QH	south_america	4	11	24	-0.678071905112638	0	0	0	0
LOC105194381	14	Queen4	north_america	10	24	24	-0.447458976971221	0	0	0	0
LOC105194381	18	118QH	south_america	10	28	24	-0.788495894806288	0	0	0	0
LOC105194381	13	Queen6	north_america	11	24	24	-0.222392421336448	0	0	0	0
LOC105194381	13	Queen5	north_america	9	22	24	-0.485426827170242	0	0	0	0
LOC105194381	71	112BQA	south_america	56	127	24	-0.337034987277571	0	0	0	0
LOC105194381	31	111BQH	south_america	0	31	24	-5	0	0	0	0
LOC105194381	18	Queen2	north_america	15	33	24	-0.247927513443586	0	0	0	0
LOC105194381	0	43CW	south_america	14	14	24	3.90689059560852	0	0	0	0
LOC105194381	33	28W	south_america	17	50	24	-0.917537839808027	0	0	0	0
LOC105194381	1	112W	south_america	1	2	24	0	0	0	0	0
LOC105194381	10	104W	south_america	10	20	24	0	0	0	0	0
LOC105194381	4	114CQH	south_america	6	10	24	0.485426827170242	0	0	0	0
LOC105194381	130	111BQA	south_america	0	130	24	-7.03342300153745	0	0	0	0
LOC105194381	53	111BQT	south_america	0	53	24	-5.75488750216347	0	0	0	0
LOC105194381	10	118QA	south_america	7	17	24	-0.459431618637297	0	0	0	0
LOC105194381	16	118QT	south_america	16	32	24	0	0	0	0	0
LOC105194381	13	114CQT	south_america	7	20	24	-0.807354922057604	0	0	0	0
LOC105194381	9	114W	south_america	9	18	24	0	0	0	0	0
LOC105194416	14	Queen5	north_america	17	31	47	0.263034405833794	0	0	0	0
LOC105194416	76	SBSb-virgin-queens-3	taiwan	55	131	47	-0.459431618637297	0	0	0	0
LOC105194416	87	SBSb-virgin-queens-1	taiwan	70	157	47	-0.309684499132615	0	0	0	0
LOC105194416	22	Queen2	north_america	21	43	47	-0.0641303374197156	0	0	0	0
LOC105194416	19	Queen1	north_america	18	37	47	-0.0740005814437769	0	0	0	0
LOC105194416	28	Queen6	north_america	23	51	47	-0.273018494406416	0	0	0	0
LOC105194416	20	Queen3	north_america	16	36	47	-0.304854581528421	0	0	0	0
LOC105194416	75	SBSb-virgin-queens-4	taiwan	56	131	47	-0.415037499278844	0	0	0	0
LOC105194416	85	SBSb-virgin-queens-2	taiwan	62	147	47	-0.448984831202182	0	0	0	0
LOC105194416	24	Queen4	north_america	18	42	47	-0.395928676331139	0	0	0	0
LOC105194434	35	Queen2	north_america	7	42	40	-2.16992500144231	0	0	0	0
LOC105194434	32	Queen3	north_america	5	37	40	-2.4594316186373	0	0	0	0
LOC105194434	87	SBSb-virgin-queens-2	taiwan	8	95	40	-3.28950661719498	0	0	0	0
LOC105194434	33	Queen1	north_america	5	38	40	-2.50250034052918	0	0	0	0
LOC105194434	26	Queen6	north_america	5	31	40	-2.16992500144231	0	0	0	0
LOC105194434	64	SBSb-virgin-queens-3	taiwan	4	68	40	-3.70043971814109	0	0	0	0
LOC105194434	18	Queen5	north_america	2	20	40	-2.66296501272243	0	0	0	0
LOC105194434	64	SBSb-virgin-queens-4	taiwan	2	66	40	-4.4374053123073	0	0	0	0
LOC105194434	33	Queen4	north_america	5	38	40	-2.50250034052918	0	0	0	0
LOC105194434	62	SBSb-virgin-queens-1	taiwan	8	70	40	-2.8073549220576	0	0	0	0
LOC105194441	4	Queen6	north_america	2	6	9.5	-0.736965594166206	0	0	0	0
LOC105194441	25	SBSb-virgin-queens-1	taiwan	9	34	9.5	-1.37851162325373	0	0	0	0
LOC105194441	8	Queen1	north_america	1	9	9.5	-2.16992500144231	0	0	0	0
LOC105194441	6	SBSb-virgin-queens-2	taiwan	5	11	9.5	-0.222392421336448	0	0	0	0
LOC105194441	11	SBSb-virgin-queens-4	taiwan	3	14	9.5	-1.58496250072116	0	0	0	0
LOC105194441	4	Queen5	north_america	1	5	9.5	-1.32192809488736	0	0	0	0
LOC105194441	4	Queen4	north_america	4	8	9.5	0	0	0	0	0
LOC105194441	4	Queen2	north_america	1	5	9.5	-1.32192809488736	0	0	0	0
LOC105194441	9	Queen3	north_america	1	10	9.5	-2.32192809488736	0	0	0	0
LOC105194441	14	SBSb-virgin-queens-3	taiwan	10	24	9.5	-0.447458976971221	0	0	0	0
LOC105194453	19	104W	south_america	15	34	34.5	-0.321928094887362	2	0	0	2
LOC105194453	13	43QH	south_america	0	13	34.5	-3.8073549220576	2	0	0	2
LOC105194453	106	43QT	south_america	0	106	34.5	-6.74146698640115	2	0	0	2
LOC105194453	16	Queen3	north_america	22	38	34.5	0.436099114806674	2	0	0	2
LOC105194453	76	111BQT	south_america	47	123	34.5	-0.681824039973745	2	0	0	2
LOC105194453	50	43QA	south_america	0	50	34.5	-5.6724253419715	2	0	0	2
LOC105194453	0	3QA	south_america	26	26	34.5	4.75488750216347	2	0	0	2
LOC105194453	20	118QA	south_america	24	44	34.5	0.251538766995964	2	0	0	2
LOC105194453	29	112W	south_america	23	52	34.5	-0.321928094887362	2	0	0	2
LOC105194453	5	111BQH	south_america	5	10	34.5	0	2	0	0	2
LOC105194453	14	Queen5	north_america	10	24	34.5	-0.447458976971221	2	0	0	2
LOC105194453	18	Queen4	north_america	16	34	34.5	-0.160464672193246	2	0	0	2
LOC105194453	0	3QH	south_america	6	6	34.5	2.8073549220576	2	0	0	2
LOC105194453	21	28W	south_america	20	41	34.5	-0.0671141958585369	2	0	0	2
LOC105194453	2	3BW	south_america	2	4	34.5	0	2	0	0	2
LOC105194453	11	Queen6	north_america	14	25	34.5	0.321928094887362	2	0	0	2
LOC105194453	39	112BQT	south_america	29	68	34.5	-0.415037499278844	2	0	0	2
LOC105194453	134	111BQA	south_america	108	242	34.5	-0.308631272273904	2	0	0	2
LOC105194453	18	114CQT	south_america	16	34	34.5	-0.160464672193246	2	0	0	2
LOC105194453	21	Queen2	north_america	14	35	34.5	-0.552541023028779	2	0	0	2
LOC105194453	6	114CQH	south_america	7	13	34.5	0.192645077942396	2	0	0	2
LOC105194453	14	Queen1	north_america	17	31	34.5	0.263034405833794	2	0	0	2
LOC105194453	25	43CW	south_america	0	25	34.5	-4.70043971814109	2	0	0	2
LOC105194453	11	114W	south_america	12	23	34.5	0.115477217419936	2	0	0	2
LOC105194453	77	SBSb-virgin-queens-4	taiwan	61	138	34.5	-0.331205908475373	2	0	0	2
LOC105194453	68	118QT	south_america	44	112	34.5	-0.616671360448494	2	0	0	2
LOC105194453	63	SBSb-virgin-queens-1	taiwan	41	104	34.5	-0.60768257722124	2	0	0	2
LOC105194453	5	112BQH	south_america	4	9	34.5	-0.263034405833794	2	0	0	2
LOC105194453	40	114CQA	south_america	29	69	34.5	-0.450661409009565	2	0	0	2
LOC105194453	70	SBSb-virgin-queens-3	taiwan	56	126	34.5	-0.31685710533994	2	0	0	2
LOC105194453	9	118QH	south_america	13	22	34.5	0.485426827170242	2	0	0	2
LOC105194453	119	112BQA	south_america	109	228	34.5	-0.125530882083859	2	0	0	2
LOC105194453	1	3QT	south_america	32	33	34.5	4.04439411935845	2	0	0	2
LOC105194453	96	SBSb-virgin-queens-2	taiwan	73	169	34.5	-0.390459476558178	2	0	0	2
LOC105194461	4	SBSb-virgin-queens-2	taiwan	6	10	8	0.485426827170242	0	0	0	0
LOC105194461	4	SBSb-virgin-queens-3	taiwan	6	10	8	0.485426827170242	0	0	0	0
LOC105194461	4	SBSb-virgin-queens-1	taiwan	2	6	8	-0.736965594166206	0	0	0	0
LOC105194461	4	SBSb-virgin-queens-4	taiwan	3	7	8	-0.321928094887362	0	0	0	0
LOC105194461	2	Queen5	north_america	2	4	8	0	0	0	0	0
LOC105194461	6	Queen3	north_america	2	8	8	-1.22239242133645	0	0	0	0
LOC105194461	6	Queen1	north_america	5	11	8	-0.222392421336448	0	0	0	0
LOC105194461	4	Queen2	north_america	4	8	8	0	0	0	0	0
LOC105194461	4	Queen4	north_america	4	8	8	0	0	0	0	0
LOC105194461	2	Queen6	north_america	5	7	8	1	0	0	0	0
LOC105194495	154	SBSb-virgin-queens-3	taiwan	130	284	32.5	-0.242701403736787	0	0	0	0
LOC105194495	689	SBSb-virgin-queens-1	taiwan	232	921	32.5	-1.56626640701125	0	0	0	0
LOC105194495	29	Queen6	north_america	14	43	32.5	-1	0	0	0	0
LOC105194495	18	Queen4	north_america	2	20	32.5	-2.66296501272243	0	0	0	0
LOC105194495	89	SBSb-virgin-queens-4	taiwan	75	164	32.5	-0.243925582886089	0	0	0	0
LOC105194495	3	Queen3	north_america	3	6	32.5	0	0	0	0	0
LOC105194495	190	SBSb-virgin-queens-2	taiwan	116	306	32.5	-0.707064108452344	0	0	0	0
LOC105194495	12	Queen2	north_america	10	22	32.5	-0.241008099503795	0	0	0	0
LOC105194495	9	Queen5	north_america	1	10	32.5	-2.32192809488736	0	0	0	0
LOC105194495	1	Queen1	north_america	1	2	32.5	0	0	0	0	0
LOC105194501	10	SBSb-virgin-queens-1	taiwan	10	20	17	0	0	0	0	0
LOC105194501	6	SBSb-virgin-queens-2	taiwan	0	6	17	-2.8073549220576	0	0	0	0
LOC105194501	11	SBSb-virgin-queens-4	taiwan	15	26	17	0.415037499278844	0	0	0	0
LOC105194501	3	Queen4	north_america	1	4	17	-1	0	0	0	0
LOC105194501	7	Queen5	north_america	3	10	17	-1	0	0	0	0
LOC105194501	21	Queen3	north_america	2	23	17	-2.87446911791614	0	0	0	0
LOC105194501	37	Queen2	north_america	7	44	17	-2.24792751344359	0	0	0	0
LOC105194501	11	Queen1	north_america	3	14	17	-1.58496250072116	0	0	0	0
LOC105194501	0	Queen6	north_america	2	2	17	1.58496250072116	0	0	0	0
LOC105194501	13	SBSb-virgin-queens-3	taiwan	7	20	17	-0.807354922057604	0	0	0	0
LOC105194585	8	43CW	south_america	8	16	18	0	3	0	0	3
LOC105194585	10	28W	south_america	5	15	18	-0.874469117916141	3	0	0	3
LOC105194585	10	118QT	south_america	11	21	18	0.125530882083859	3	0	0	3
LOC105194585	8	112W	south_america	8	16	18	0	3	0	0	3
LOC105194585	18	3QT	south_america	20	38	18	0.144389909335175	3	0	0	3
LOC105194585	12	112BQT	south_america	10	22	18	-0.241008099503795	3	0	0	3
LOC105194585	4	118QH	south_america	5	9	18	0.263034405833794	3	0	0	3
LOC105194585	12	43QT	south_america	6	18	18	-0.893084796083488	3	0	0	3
LOC105194585	1	3BW	south_america	5	6	18	1.58496250072116	3	0	0	3
LOC105194585	1	112BQH	south_america	0	1	18	-1	3	0	0	3
LOC105194585	16	SBSb-virgin-queens-4	taiwan	12	28	18	-0.387023123109247	3	0	0	3
LOC105194585	11	Queen1	north_america	12	23	18	0.115477217419936	3	0	0	3
LOC105194585	10	SBSb-virgin-queens-1	taiwan	9	19	18	-0.137503523749935	3	0	0	3
LOC105194585	14	3QA	south_america	23	37	18	0.678071905112638	3	0	0	3
LOC105194585	12	Queen2	north_america	11	23	18	-0.115477217419936	3	0	0	3
LOC105194585	19	111BQT	south_america	26	45	18	0.432959407276106	3	0	0	3
LOC105194585	44	112BQA	south_america	29	73	18	-0.584962500721156	3	0	0	3
LOC105194585	8	43QA	south_america	8	16	18	0	3	0	0	3
LOC105194585	6	118QA	south_america	9	15	18	0.514573172829758	3	0	0	3
LOC105194585	13	SBSb-virgin-queens-3	taiwan	9	22	18	-0.485426827170242	3	0	0	3
LOC105194585	2	114W	south_america	4	6	18	0.736965594166206	3	0	0	3
LOC105194585	9	Queen5	north_america	8	17	18	-0.15200309344505	3	0	0	3
LOC105194585	11	Queen4	north_america	11	22	18	0	3	0	0	3
LOC105194585	2	43QH	south_america	0	2	18	-1.58496250072116	3	0	0	3
LOC105194585	18	SBSb-virgin-queens-2	taiwan	16	34	18	-0.160464672193246	3	0	0	3
LOC105194585	8	3QH	south_america	5	13	18	-0.584962500721156	3	0	0	3
LOC105194585	4	104W	south_america	5	9	18	0.263034405833794	3	0	0	3
LOC105194585	10	114CQT	south_america	8	18	18	-0.289506617194985	3	0	0	3
LOC105194585	10	Queen3	north_america	14	24	18	0.447458976971221	3	0	0	3
LOC105194585	9	Queen6	north_america	9	18	18	0	3	0	0	3
LOC105194585	2	114CQH	south_america	2	4	18	0	3	0	0	3
LOC105194585	5	114CQA	south_america	6	11	18	0.222392421336448	3	0	0	3
LOC105194585	0	111BQH	south_america	2	2	18	1.58496250072116	3	0	0	3
LOC105194585	29	111BQA	south_america	30	59	18	0.0473057147783568	3	0	0	3
LOC105194610	2	SBSb-virgin-queens-1	taiwan	6	8	6.5	1.22239242133645	0	0	0	0
LOC105194610	1	SBSb-virgin-queens-3	taiwan	4	5	6.5	1.32192809488736	0	0	0	0
LOC105194610	1	SBSb-virgin-queens-2	taiwan	5	6	6.5	1.58496250072116	0	0	0	0
LOC105194610	1	SBSb-virgin-queens-4	taiwan	6	7	6.5	1.8073549220576	0	0	0	0
LOC105194663	24	SBSb-virgin-queens-3	taiwan	22	46	32.5	-0.120294233717712	0	0	0	0
LOC105194663	18	Queen3	north_america	14	32	32.5	-0.341036917835067	0	0	0	0
LOC105194663	16	Queen6	north_america	13	29	32.5	-0.280107919192735	0	0	0	0
LOC105194663	38	SBSb-virgin-queens-2	taiwan	26	64	32.5	-0.53051471669878	0	0	0	0
LOC105194663	14	Queen5	north_america	10	24	32.5	-0.447458976971221	0	0	0	0
LOC105194663	16	Queen1	north_america	17	33	32.5	0.082462160191973	0	0	0	0
LOC105194663	22	Queen2	north_america	12	34	32.5	-0.823122237915921	0	0	0	0
LOC105194663	23	SBSb-virgin-queens-1	taiwan	20	43	32.5	-0.192645077942396	0	0	0	0
LOC105194663	16	Queen4	north_america	12	28	32.5	-0.387023123109247	0	0	0	0
LOC105194663	15	SBSb-virgin-queens-4	taiwan	15	30	32.5	0	0	0	0	0
LOC105194672	13	114CQT	south_america	31	44	59.5	1.1926450779424	0	0	0	0
LOC105194672	1	114CQA	south_america	1	2	59.5	0	0	0	0	0
LOC105194672	8	114CQH	south_america	10	18	59.5	0.289506617194985	0	0	0	0
LOC105194672	10	112W	south_america	22	32	59.5	1.06413033741972	0	0	0	0
LOC105194672	24	114W	south_america	28	52	59.5	0.214124805352847	0	0	0	0
LOC105194672	98	SBSb-virgin-queens-3	taiwan	85	183	59.5	-0.203091865377512	0	0	0	0
LOC105194672	31	Queen3	north_america	29	60	59.5	-0.0931094043914815	0	0	0	0
LOC105194672	117	SBSb-virgin-queens-2	taiwan	126	243	59.5	0.106041637410325	0	0	0	0
LOC105194672	55	112BQT	south_america	70	125	59.5	0.342392197447078	0	0	0	0
LOC105194672	4	112BQH	south_america	12	16	59.5	1.37851162325373	0	0	0	0
LOC105194672	106	111BQT	south_america	100	206	59.5	-0.0832555036493522	0	0	0	0
LOC105194672	114	SBSb-virgin-queens-4	taiwan	104	218	59.5	-0.131244533278253	0	0	0	0
LOC105194672	4	111BQH	south_america	6	10	59.5	0.485426827170242	0	0	0	0
LOC105194672	26	Queen6	north_america	23	49	59.5	-0.169925001442312	0	0	0	0
LOC105194672	38	Queen2	north_america	35	73	59.5	-0.115477217419936	0	0	0	0
LOC105194672	64	SBSb-virgin-queens-1	taiwan	68	132	59.5	0.0861566437497146	0	0	0	0
LOC105194672	10	3QH	south_america	12	22	59.5	0.241008099503795	0	0	0	0
LOC105194672	83	118QA	south_america	76	159	59.5	-0.125530882083859	0	0	0	0
LOC105194672	24	104W	south_america	22	46	59.5	-0.120294233717712	0	0	0	0
LOC105194672	31	43QT	south_america	26	57	59.5	-0.245112497836531	0	0	0	0
LOC105194672	36	Queen1	north_america	23	59	59.5	-0.624490864907794	0	0	0	0
LOC105194672	103	112BQA	south_america	124	227	59.5	0.265344566520995	0	0	0	0
LOC105194672	30	3QA	south_america	28	58	59.5	-0.0962153152593032	0	0	0	0
LOC105194672	209	118QT	south_america	168	377	59.5	-0.313366081383938	0	0	0	0
LOC105194672	4	43QH	south_america	4	8	59.5	0	0	0	0	0
LOC105194672	21	Queen5	north_america	28	49	59.5	0.398549376490275	0	0	0	0
LOC105194672	33	Queen4	north_america	31	64	59.5	-0.0874628412503394	0	0	0	0
LOC105194672	52	3QT	south_america	44	96	59.5	-0.236067358233524	0	0	0	0
LOC105194672	32	43QA	south_america	31	63	59.5	-0.0443941193584534	0	0	0	0
LOC105194672	4	3BW	south_america	7	11	59.5	0.678071905112638	0	0	0	0
LOC105194672	72	28W	south_america	68	140	59.5	-0.0813001021018482	0	0	0	0
LOC105194672	30	118QH	south_america	34	64	59.5	0.175086706558091	0	0	0	0
LOC105194672	16	111BQA	south_america	62	78	59.5	1.88981708224958	0	0	0	0
LOC105194672	16	43CW	south_america	18	34	59.5	0.160464672193246	0	0	0	0
LOC105194675	22	3QA	south_america	17	39	30	-0.3536369546147	1	0	0	1
LOC105194675	54	111BQA	south_america	58	112	30	0.101283335837182	1	0	0	1
LOC105194675	3	3BW	south_america	7	10	30	1	1	0	0	1
LOC105194675	1	111BQH	south_america	7	8	30	2	1	0	0	1
LOC105194675	3	3QH	south_america	1	4	30	-1	1	0	0	1
LOC105194675	28	SBSb-virgin-queens-1	taiwan	26	54	30	-0.103093492964104	1	0	0	1
LOC105194675	59	SBSb-virgin-queens-2	taiwan	50	109	30	-0.234465253637023	1	0	0	1
LOC105194675	52	SBSb-virgin-queens-4	taiwan	52	104	30	0	1	0	0	1
LOC105194675	20	118QT	south_america	25	45	30	0.308122295362332	1	0	0	1
LOC105194675	47	SBSb-virgin-queens-3	taiwan	48	95	30	0.0297473433940519	1	0	0	1
LOC105194675	9	118QH	south_america	13	22	30	0.485426827170242	1	0	0	1
LOC105194675	19	28W	south_america	21	40	30	0.137503523749935	1	0	0	1
LOC105194675	3	43QH	south_america	2	5	30	-0.415037499278844	1	0	0	1
LOC105194675	16	43QT	south_america	14	30	30	-0.180572245641821	1	0	0	1
LOC105194675	12	Queen1	north_america	10	22	30	-0.241008099503795	1	0	0	1
LOC105194675	10	114CQT	south_america	6	16	30	-0.652076696579693	1	0	0	1
LOC105194675	21	118QA	south_america	23	44	30	0.125530882083859	1	0	0	1
LOC105194675	16	114W	south_america	14	30	30	-0.180572245641821	1	0	0	1
LOC105194675	17	114CQA	south_america	20	37	30	0.222392421336448	1	0	0	1
LOC105194675	25	43QA	south_america	24	49	30	-0.0565835283663674	1	0	0	1
LOC105194675	25	104W	south_america	13	38	30	-0.893084796083488	1	0	0	1
LOC105194675	11	Queen6	north_america	16	27	30	0.502500340529183	1	0	0	1
LOC105194675	4	114CQH	south_america	12	16	30	1.37851162325373	1	0	0	1
LOC105194675	11	112BQT	south_america	10	21	30	-0.125530882083859	1	0	0	1
LOC105194675	18	112W	south_america	19	37	30	0.0740005814437768	1	0	0	1
LOC105194675	16	Queen3	north_america	14	30	30	-0.180572245641821	1	0	0	1
LOC105194675	3	112BQH	south_america	4	7	30	0.321928094887362	1	0	0	1
LOC105194675	18	3QT	south_america	9	27	30	-0.925999418556223	1	0	0	1
LOC105194675	10	Queen5	north_america	10	20	30	0	1	0	0	1
LOC105194675	14	Queen4	north_america	14	28	30	0	1	0	0	1
LOC105194675	14	Queen2	north_america	20	34	30	0.485426827170242	1	0	0	1
LOC105194675	13	43CW	south_america	16	29	30	0.280107919192735	1	0	0	1
LOC105194675	20	111BQT	south_america	31	51	30	0.60768257722124	1	0	0	1
LOC105194675	17	112BQA	south_america	32	49	30	0.874469117916141	1	0	0	1
LOC105194690	3	SBSb-virgin-queens-4	taiwan	9	12	13.5	1.32192809488736	0	0	0	0
LOC105194690	5	Queen6	north_america	12	17	13.5	1.11547721741994	0	0	0	0
LOC105194690	4	Queen5	north_america	9	13	13.5	1	0	0	0	0
LOC105194690	7	SBSb-virgin-queens-2	taiwan	11	18	13.5	0.584962500721156	0	0	0	0
LOC105194690	6	Queen2	north_america	8	14	13.5	0.362570079384708	0	0	0	0
LOC105194690	2	SBSb-virgin-queens-1	taiwan	8	10	13.5	1.58496250072116	0	0	0	0
LOC105194690	6	Queen3	north_america	9	15	13.5	0.514573172829758	0	0	0	0
LOC105194690	6	Queen4	north_america	6	12	13.5	0	0	0	0	0
LOC105194690	12	SBSb-virgin-queens-3	taiwan	6	18	13.5	-0.893084796083488	0	0	0	0
LOC105194690	4	Queen1	north_america	9	13	13.5	1	0	0	0	0
LOC105194763	7	114W	south_america	8	15	18.5	0.169925001442312	0	0	0	0
LOC105194763	10	114CQT	south_america	14	24	18.5	0.447458976971221	0	0	0	0
LOC105194763	31	114CQA	south_america	18	49	18.5	-0.752072486556414	0	0	0	0
LOC105194763	18	112W	south_america	12	30	18.5	-0.547487795302493	0	0	0	0
LOC105194763	24	112BQT	south_america	20	44	18.5	-0.251538766995965	0	0	0	0
LOC105194763	4	114CQH	south_america	4	8	18.5	0	0	0	0	0
LOC105194763	1	SBSb-virgin-queens-2	taiwan	1	2	18.5	0	0	0	0	0
LOC105194763	49	112BQA	south_america	54	103	18.5	0.137503523749935	0	0	0	0
LOC105194763	4	3BW	south_america	4	8	18.5	0	0	0	0	0
LOC105194763	1	Queen5	north_america	1	2	18.5	0	0	0	0	0
LOC105194763	2	Queen1	north_america	2	4	18.5	0	0	0	0	0
LOC105194763	1	3QH	south_america	8	9	18.5	2.16992500144231	0	0	0	0
LOC105194763	26	111BQT	south_america	17	43	18.5	-0.584962500721156	0	0	0	0
LOC105194763	9	111BQH	south_america	6	15	18.5	-0.514573172829758	0	0	0	0
LOC105194763	1	SBSb-virgin-queens-3	taiwan	3	4	18.5	1	0	0	0	0
LOC105194763	1	SBSb-virgin-queens-1	taiwan	1	2	18.5	0	0	0	0	0
LOC105194763	10	112BQH	south_america	8	18	18.5	-0.289506617194985	0	0	0	0
LOC105194763	9	3QA	south_america	10	19	18.5	0.137503523749935	0	0	0	0
LOC105194763	24	43QT	south_america	2	26	18.5	-3.05889368905357	0	0	0	0
LOC105194763	18	28W	south_america	16	34	18.5	-0.160464672193246	0	0	0	0
LOC105194763	4	43QH	south_america	1	5	18.5	-1.32192809488736	0	0	0	0
LOC105194763	41	111BQA	south_america	28	69	18.5	-0.534336427651188	0	0	0	0
LOC105194763	1	Queen6	north_america	1	2	18.5	0	0	0	0	0
LOC105194763	18	43QA	south_america	4	22	18.5	-1.92599941855622	0	0	0	0
LOC105194763	5	118QH	south_america	4	9	18.5	-0.263034405833794	0	0	0	0
LOC105194763	16	104W	south_america	12	28	18.5	-0.387023123109247	0	0	0	0
LOC105194763	1	SBSb-virgin-queens-4	taiwan	2	3	18.5	0.584962500721156	0	0	0	0
LOC105194763	20	Queen2	north_america	21	41	18.5	0.067114195858537	0	0	0	0
LOC105194763	9	Queen3	north_america	8	17	18.5	-0.15200309344505	0	0	0	0
LOC105194763	15	3QT	south_america	8	23	18.5	-0.830074998557688	0	0	0	0
LOC105194763	16	Queen4	north_america	14	30	18.5	-0.180572245641821	0	0	0	0
LOC105194763	13	43CW	south_america	2	15	18.5	-2.22239242133645	0	0	0	0
LOC105194763	20	118QT	south_america	17	37	18.5	-0.222392421336448	0	0	0	0
LOC105194763	12	118QA	south_america	12	24	18.5	0	0	0	0	0
LOC105195701	12	3QT	south_america	7	19	19	-0.700439718141092	0	0	0	0
LOC105195701	6	Queen5	north_america	8	14	19	0.362570079384708	0	0	0	0
LOC105195701	8	118QT	south_america	8	16	19	0	0	0	0	0
LOC105195701	3	3QA	south_america	9	12	19	1.32192809488736	0	0	0	0
LOC105195701	16	SBSb-virgin-queens-3	taiwan	26	42	19	0.667424660913129	0	0	0	0
LOC105195701	20	111BQT	south_america	24	44	19	0.251538766995964	0	0	0	0
LOC105195701	14	SBSb-virgin-queens-1	taiwan	16	30	19	0.180572245641821	0	0	0	0
LOC105195701	4	118QH	south_america	1	5	19	-1.32192809488736	0	0	0	0
LOC105195701	5	111BQH	south_america	2	7	19	-1	0	0	0	0
LOC105195701	3	3QH	south_america	9	12	19	1.32192809488736	0	0	0	0
LOC105195701	12	104W	south_america	21	33	19	0.758991900496205	0	0	0	0
LOC105195701	6	Queen1	north_america	6	12	19	0	0	0	0	0
LOC105195701	0	3BW	south_america	1	1	19	1	0	0	0	0
LOC105195701	10	Queen4	north_america	8	18	19	-0.289506617194985	0	0	0	0
LOC105195701	20	SBSb-virgin-queens-2	taiwan	26	46	19	0.362570079384708	0	0	0	0
LOC105195701	12	43QT	south_america	6	18	19	-0.893084796083488	0	0	0	0
LOC105195701	5	112BQH	south_america	1	6	19	-1.58496250072116	0	0	0	0
LOC105195701	15	112BQT	south_america	15	30	19	0	0	0	0	0
LOC105195701	27	111BQA	south_america	24	51	19	-0.163498732282879	0	0	0	0
LOC105195701	11	114W	south_america	7	18	19	-0.584962500721156	0	0	0	0
LOC105195701	2	114CQH	south_america	2	4	19	0	0	0	0	0
LOC105195701	11	118QA	south_america	10	21	19	-0.125530882083859	0	0	0	0
LOC105195701	19	28W	south_america	14	33	19	-0.415037499278844	0	0	0	0
LOC105195701	8	43CW	south_america	12	20	19	0.53051471669878	0	0	0	0
LOC105195701	10	Queen3	north_america	9	19	19	-0.137503523749935	0	0	0	0
LOC105195701	18	SBSb-virgin-queens-4	taiwan	18	36	19	0	0	0	0	0
LOC105195701	10	Queen2	north_america	12	22	19	0.241008099503795	0	0	0	0
LOC105195701	1	43QH	south_america	5	6	19	1.58496250072116	0	0	0	0
LOC105195701	11	112W	south_america	11	22	19	0	0	0	0	0
LOC105195701	18	114CQA	south_america	25	43	19	0.452512204697507	0	0	0	0
LOC105195701	7	Queen6	north_america	9	16	19	0.321928094887362	0	0	0	0
LOC105195701	10	43QA	south_america	17	27	19	0.710493382805015	0	0	0	0
LOC105195701	2	114CQT	south_america	3	5	19	0.415037499278844	0	0	0	0
LOC105195701	60	112BQA	south_america	43	103	19	-0.471305718925589	0	0	0	0
LOC105195720	14	SBSb-virgin-queens-1	taiwan	16	30	51.5	0.180572245641821	0	0	0	0
LOC105195720	30	Queen6	north_america	20	50	51.5	-0.561878887608115	0	0	0	0
LOC105195720	25	SBSb-virgin-queens-4	taiwan	20	45	51.5	-0.308122295362332	0	0	0	0
LOC105195720	30	Queen5	north_america	24	54	51.5	-0.310340120612151	0	0	0	0
LOC105195720	33	Queen3	north_america	20	53	51.5	-0.695145418471579	0	0	0	0
LOC105195720	28	SBSb-virgin-queens-3	taiwan	27	55	51.5	-0.050626073069968	0	0	0	0
LOC105195720	28	SBSb-virgin-queens-2	taiwan	26	54	51.5	-0.103093492964104	0	0	0	0
LOC105195720	24	Queen4	north_america	13	37	51.5	-0.83650126771712	0	0	0	0
LOC105195720	28	Queen2	north_america	18	46	51.5	-0.610053481683987	0	0	0	0
LOC105195720	34	Queen1	north_america	42	76	51.5	0.296981737757132	0	0	0	0
LOC105195733	3	SBSb-virgin-queens-4	taiwan	3	6	5.5	0	0	0	0	0
LOC105195733	1	SBSb-virgin-queens-3	taiwan	0	1	5.5	-1	0	0	0	0
LOC105195733	5	Queen2	north_america	2	7	5.5	-1	0	0	0	0
LOC105195733	5	Queen1	north_america	1	6	5.5	-1.58496250072116	0	0	0	0
LOC105195733	4	Queen3	north_america	1	5	5.5	-1.32192809488736	0	0	0	0
LOC105195733	2	SBSb-virgin-queens-2	taiwan	2	4	5.5	0	0	0	0	0
LOC105195733	2	SBSb-virgin-queens-1	taiwan	4	6	5.5	0.736965594166206	0	0	0	0
LOC105195733	4	Queen5	north_america	2	6	5.5	-0.736965594166206	0	0	0	0
LOC105195733	0	Queen6	north_america	2	2	5.5	1.58496250072116	0	0	0	0
LOC105195733	1	Queen4	north_america	1	2	5.5	0	0	0	0	0
LOC105195750	2	Queen3	north_america	5	7	10.5	1	0	0	0	0
LOC105195750	4	Queen5	north_america	4	8	10.5	0	0	0	0	0
LOC105195750	3	Queen1	north_america	4	7	10.5	0.321928094887362	0	0	0	0
LOC105195750	7	Queen4	north_america	5	12	10.5	-0.415037499278844	0	0	0	0
LOC105195750	13	SBSb-virgin-queens-3	taiwan	23	36	10.5	0.777607578663552	0	0	0	0
LOC105195750	11	SBSb-virgin-queens-2	taiwan	12	23	10.5	0.115477217419936	0	0	0	0
LOC105195750	3	Queen2	north_america	4	7	10.5	0.321928094887362	0	0	0	0
LOC105195750	8	SBSb-virgin-queens-1	taiwan	14	22	10.5	0.736965594166206	0	0	0	0
LOC105195750	11	SBSb-virgin-queens-4	taiwan	11	22	10.5	0	0	0	0	0
LOC105195750	3	Queen6	north_america	6	9	10.5	0.807354922057604	0	0	0	0
LOC105195766	1	Queen3	north_america	2	3	6	0.584962500721156	0	0	0	0
LOC105195766	0	Queen2	north_america	2	2	6	1.58496250072116	0	0	0	0
LOC105195766	4	Queen4	north_america	1	5	6	-1.32192809488736	0	0	0	0
LOC105195766	2	Queen1	north_america	2	4	6	0	0	0	0	0
LOC105195766	9	SBSb-virgin-queens-4	taiwan	5	14	6	-0.736965594166206	0	0	0	0
LOC105195766	8	SBSb-virgin-queens-1	taiwan	14	22	6	0.736965594166206	0	0	0	0
LOC105195766	4	Queen5	north_america	2	6	6	-0.736965594166206	0	0	0	0
LOC105195766	6	SBSb-virgin-queens-3	taiwan	9	15	6	0.514573172829758	0	0	0	0
LOC105195766	11	SBSb-virgin-queens-2	taiwan	10	21	6	-0.125530882083859	0	0	0	0
LOC105195766	2	Queen6	north_america	4	6	6	0.736965594166206	0	0	0	0
LOC105195781	1	Queen6	north_america	2	3	8.5	0.584962500721156	0	0	0	0
LOC105195781	1	Queen5	north_america	1	2	8.5	0	0	0	0	0
LOC105195781	7	Queen1	north_america	2	9	8.5	-1.41503749927884	0	0	0	0
LOC105195781	9	SBSb-virgin-queens-2	taiwan	3	12	8.5	-1.32192809488736	0	0	0	0
LOC105195781	6	SBSb-virgin-queens-1	taiwan	6	12	8.5	0	0	0	0	0
LOC105195781	14	SBSb-virgin-queens-3	taiwan	8	22	8.5	-0.736965594166206	0	0	0	0
LOC105195781	16	SBSb-virgin-queens-4	taiwan	6	22	8.5	-1.28010791919274	0	0	0	0
LOC105195781	3	Queen4	north_america	3	6	8.5	0	0	0	0	0
LOC105195781	6	Queen3	north_america	2	8	8.5	-1.22239242133645	0	0	0	0
LOC105195781	6	Queen2	north_america	1	7	8.5	-1.8073549220576	0	0	0	0
LOC105195789	11	112BQA	south_america	12	23	6	0.115477217419936	0	0	0	0
LOC105195789	2	111BQH	south_america	1	3	6	-0.584962500721156	0	0	0	0
LOC105195789	17	111BQA	south_america	16	33	6	-0.082462160191973	0	0	0	0
LOC105195789	2	118QH	south_america	0	2	6	-1.58496250072116	0	0	0	0
LOC105195789	2	111BQT	south_america	5	7	6	1	0	0	0	0
LOC105195789	8	Queen5	north_america	6	14	6	-0.362570079384708	0	0	0	0
LOC105195789	1	3QT	south_america	2	3	6	0.584962500721156	0	0	0	0
LOC105195789	3	118QT	south_america	4	7	6	0.321928094887362	0	0	0	0
LOC105195789	2	114W	south_america	2	4	6	0	0	0	0	0
LOC105195789	4	3QH	south_america	0	4	6	-2.32192809488736	0	0	0	0
LOC105195789	20	SBSb-virgin-queens-3	taiwan	22	42	6	0.131244533278253	0	0	0	0
LOC105195789	2	114CQT	south_america	3	5	6	0.415037499278844	0	0	0	0
LOC105195789	2	3QA	south_america	1	3	6	-0.584962500721156	0	0	0	0
LOC105195789	11	Queen1	north_america	9	20	6	-0.263034405833794	0	0	0	0
LOC105195789	3	104W	south_america	3	6	6	0	0	0	0	0
LOC105195789	25	SBSb-virgin-queens-2	taiwan	22	47	6	-0.176877762084079	0	0	0	0
LOC105195789	0	43QH	south_america	0	0	6	0	0	0	0	0
LOC105195789	4	112W	south_america	1	5	6	-1.32192809488736	0	0	0	0
LOC105195789	0	3BW	south_america	0	0	6	0	0	0	0	0
LOC105195789	8	Queen6	north_america	6	14	6	-0.362570079384708	0	0	0	0
LOC105195789	10	Queen2	north_america	7	17	6	-0.459431618637297	0	0	0	0
LOC105195789	14	SBSb-virgin-queens-1	taiwan	8	22	6	-0.736965594166206	0	0	0	0
LOC105195789	2	118QA	south_america	3	5	6	0.415037499278844	0	0	0	0
LOC105195789	4	28W	south_america	2	6	6	-0.736965594166206	0	0	0	0
LOC105195789	3	112BQT	south_america	0	3	6	-2	0	0	0	0
LOC105195789	22	SBSb-virgin-queens-4	taiwan	24	46	6	0.120294233717712	0	0	0	0
LOC105195789	0	112BQH	south_america	1	1	6	1	0	0	0	0
LOC105195789	9	114CQA	south_america	4	13	6	-1	0	0	0	0
LOC105195789	2	114CQH	south_america	0	2	6	-1.58496250072116	0	0	0	0
LOC105195789	0	43QT	south_america	0	0	6	0	0	0	0	0
LOC105195789	4	Queen4	north_america	6	10	6	0.485426827170242	0	0	0	0
LOC105195789	2	43CW	south_america	0	2	6	-1.58496250072116	0	0	0	0
LOC105195789	6	Queen3	north_america	8	14	6	0.362570079384708	0	0	0	0
LOC105195789	3	43QA	south_america	4	7	6	0.321928094887362	0	0	0	0
LOC105195797	10	Queen6	north_america	8	18	17	-0.289506617194985	0	0	0	0
LOC105195797	8	Queen5	north_america	8	16	17	0	0	0	0	0
LOC105195797	1	SBSb-virgin-queens-1	taiwan	3	4	17	1	0	0	0	0
LOC105195797	1	SBSb-virgin-queens-4	taiwan	2	3	17	0.584962500721156	0	0	0	0
LOC105195797	1	SBSb-virgin-queens-3	taiwan	3	4	17	1	0	0	0	0
LOC105195797	12	Queen3	north_america	10	22	17	-0.241008099503795	0	0	0	0
LOC105195797	1	SBSb-virgin-queens-2	taiwan	2	3	17	0.584962500721156	0	0	0	0
LOC105195797	16	Queen4	north_america	20	36	17	0.304854581528421	0	0	0	0
LOC105195797	13	Queen1	north_america	10	23	17	-0.347923303420307	0	0	0	0
LOC105195797	10	Queen2	north_america	13	23	17	0.347923303420307	0	0	0	0
LOC105195826	12	Queen2	north_america	0	12	26.5	-3.70043971814109	0	0	0	0
LOC105195826	32	SBSb-virgin-queens-1	taiwan	32	64	26.5	0	0	0	0	0
LOC105195826	22	SBSb-virgin-queens-2	taiwan	20	42	26.5	-0.131244533278253	0	0	0	0
LOC105195826	8	SBSb-virgin-queens-3	taiwan	4	12	26.5	-0.84799690655495	0	0	0	0
LOC105195826	11	SBSb-virgin-queens-4	taiwan	17	28	26.5	0.584962500721156	0	0	0	0
LOC105195826	13	Queen3	north_america	4	17	26.5	-1.48542682717024	0	0	0	0
LOC105195826	14	Queen4	north_america	6	20	26.5	-1.09953567355091	0	0	0	0
LOC105195826	22	Queen6	north_america	10	32	26.5	-1.06413033741972	0	0	0	0
LOC105195826	21	Queen5	north_america	4	25	26.5	-2.13750352374994	0	0	0	0
LOC105195826	24	Queen1	north_america	6	30	26.5	-1.83650126771712	0	0	0	0
LOC105196903	4	Queen1	north_america	4	8	6	0	1	0	0	1
LOC105196903	4	Queen5	north_america	3	7	6	-0.321928094887362	1	0	0	1
LOC105196903	2	SBSb-virgin-queens-1	taiwan	2	4	6	0	1	0	0	1
LOC105196903	2	SBSb-virgin-queens-4	taiwan	3	5	6	0.415037499278844	1	0	0	1
LOC105196903	4	SBSb-virgin-queens-2	taiwan	3	7	6	-0.321928094887362	1	0	0	1
LOC105196903	4	Queen6	north_america	4	8	6	0	1	0	0	1
LOC105196903	3	SBSb-virgin-queens-3	taiwan	4	7	6	0.321928094887362	1	0	0	1
LOC105196903	2	Queen2	north_america	2	4	6	0	1	0	0	1
LOC105196903	3	Queen4	north_america	2	5	6	-0.415037499278844	1	0	0	1
LOC105196903	3	Queen3	north_america	2	5	6	-0.415037499278844	1	0	0	1
LOC105196907	3	Queen1	north_america	1	4	5.5	-1	0	0	0	0
LOC105196907	0	114W	south_america	1	1	5.5	1	0	0	0	0
LOC105196907	13	SBSb-virgin-queens-3	taiwan	12	25	5.5	-0.106915203916512	0	0	0	0
LOC105196907	5	28W	south_america	5	10	5.5	0	0	0	0	0
LOC105196907	4	114CQA	south_america	1	5	5.5	-1.32192809488736	0	0	0	0
LOC105196907	3	Queen6	north_america	6	9	5.5	0.807354922057604	0	0	0	0
LOC105196907	0	114CQH	south_america	0	0	5.5	0	0	0	0	0
LOC105196907	0	118QH	south_america	0	0	5.5	0	0	0	0	0
LOC105196907	0	114CQT	south_america	3	3	5.5	2	0	0	0	0
LOC105196907	6	118QT	south_america	8	14	5.5	0.362570079384708	0	0	0	0
LOC105196907	4	3QA	south_america	2	6	5.5	-0.736965594166206	0	0	0	0
LOC105196907	3	Queen3	north_america	4	7	5.5	0.321928094887362	0	0	0	0
LOC105196907	6	Queen5	north_america	8	14	5.5	0.362570079384708	0	0	0	0
LOC105196907	6	112BQT	south_america	2	8	5.5	-1.22239242133645	0	0	0	0
LOC105196907	0	118QA	south_america	4	4	5.5	2.32192809488736	0	0	0	0
LOC105196907	0	112BQA	south_america	0	0	5.5	0	0	0	0	0
LOC105196907	4	3QT	south_america	10	14	5.5	1.13750352374994	0	0	0	0
LOC105196907	11	SBSb-virgin-queens-4	taiwan	9	20	5.5	-0.263034405833794	0	0	0	0
LOC105196907	3	104W	south_america	6	9	5.5	0.807354922057604	0	0	0	0
LOC105196907	13	111BQA	south_america	4	17	5.5	-1.48542682717024	0	0	0	0
LOC105196907	8	SBSb-virgin-queens-1	taiwan	3	11	5.5	-1.16992500144231	0	0	0	0
LOC105196907	0	43CW	south_america	7	7	5.5	3	0	0	0	0
LOC105196907	0	112BQH	south_america	2	2	5.5	1.58496250072116	0	0	0	0
LOC105196907	2	Queen4	north_america	3	5	5.5	0.415037499278844	0	0	0	0
LOC105196907	0	3QH	south_america	1	1	5.5	1	0	0	0	0
LOC105196907	14	SBSb-virgin-queens-2	taiwan	6	20	5.5	-1.09953567355091	0	0	0	0
LOC105196907	0	43QH	south_america	0	0	5.5	0	0	0	0	0
LOC105196907	3	43QT	south_america	1	4	5.5	-1	0	0	0	0
LOC105196907	5	Queen2	north_america	5	10	5.5	0	0	0	0	0
LOC105196907	2	43QA	south_america	2	4	5.5	0	0	0	0	0
LOC105196907	2	112W	south_america	1	3	5.5	-0.584962500721156	0	0	0	0
LOC105196907	0	111BQH	south_america	0	0	5.5	0	0	0	0	0
LOC105196907	0	3BW	south_america	0	0	5.5	0	0	0	0	0
LOC105196907	7	111BQT	south_america	5	12	5.5	-0.415037499278844	0	0	0	0
LOC105199289	4	Queen4	north_america	1	5	6.5	-1.32192809488736	0	0	0	0
LOC105199289	2	Queen6	north_america	2	4	6.5	0	0	0	0	0
LOC105199289	14	SBSb-virgin-queens-4	taiwan	3	17	6.5	-1.90689059560852	0	0	0	0
LOC105199289	4	Queen3	north_america	2	6	6.5	-0.736965594166206	0	0	0	0
LOC105199289	3	Queen1	north_america	2	5	6.5	-0.415037499278844	0	0	0	0
LOC105199289	5	Queen2	north_america	2	7	6.5	-1	0	0	0	0
LOC105199289	12	SBSb-virgin-queens-2	taiwan	6	18	6.5	-0.893084796083488	0	0	0	0
LOC105199289	4	Queen5	north_america	1	5	6.5	-1.32192809488736	0	0	0	0
LOC105199289	8	SBSb-virgin-queens-3	taiwan	3	11	6.5	-1.16992500144231	0	0	0	0
LOC105199289	11	SBSb-virgin-queens-1	taiwan	6	17	6.5	-0.777607578663552	0	0	0	0
LOC105199290	7	Queen6	north_america	4	11	9.5	-0.678071905112638	0	0	0	0
LOC105199290	4	Queen1	north_america	2	6	9.5	-0.736965594166206	0	0	0	0
LOC105199290	3	Queen5	north_america	2	5	9.5	-0.415037499278844	0	0	0	0
LOC105199290	6	Queen4	north_america	2	8	9.5	-1.22239242133645	0	0	0	0
LOC105199290	5	Queen2	north_america	2	7	9.5	-1	0	0	0	0
LOC105199290	12	SBSb-virgin-queens-1	taiwan	9	21	9.5	-0.37851162325373	0	0	0	0
LOC105199290	8	SBSb-virgin-queens-3	taiwan	3	11	9.5	-1.16992500144231	0	0	0	0
LOC105199290	4	Queen3	north_america	2	6	9.5	-0.736965594166206	0	0	0	0
LOC105199290	15	SBSb-virgin-queens-4	taiwan	3	18	9.5	-2	0	0	0	0
LOC105199290	12	SBSb-virgin-queens-2	taiwan	8	20	9.5	-0.53051471669878	0	0	0	0
LOC105199292	1	112BQH	south_america	0	1	15	-1	0	0	0	0
LOC105199292	1	111BQH	south_america	1	2	15	0	0	0	0	0
LOC105199292	4	114CQT	south_america	6	10	15	0.485426827170242	0	0	0	0
LOC105199292	13	3QA	south_america	10	23	15	-0.347923303420307	0	0	0	0
LOC105199292	3	114W	south_america	0	3	15	-2	0	0	0	0
LOC105199292	9	112W	south_america	10	19	15	0.137503523749935	0	0	0	0
LOC105199292	0	112BQA	south_america	0	0	15	0	0	0	0	0
LOC105199292	24	SBSb-virgin-queens-4	taiwan	29	53	15	0.263034405833794	0	0	0	0
LOC105199292	7	Queen5	north_america	7	14	15	0	0	0	0	0
LOC105199292	1	114CQH	south_america	1	2	15	0	0	0	0	0
LOC105199292	11	112BQT	south_america	4	15	15	-1.26303440583379	0	0	0	0
LOC105199292	7	114CQA	south_america	17	24	15	1.16992500144231	0	0	0	0
LOC105199292	0	3BW	south_america	1	1	15	1	0	0	0	0
LOC105199292	5	Queen3	north_america	4	9	15	-0.263034405833794	0	0	0	0
LOC105199292	9	104W	south_america	15	24	15	0.678071905112638	0	0	0	0
LOC105199292	22	111BQT	south_america	13	35	15	-0.716207033999409	0	0	0	0
LOC105199292	22	111BQA	south_america	21	43	15	-0.0641303374197156	0	0	0	0
LOC105199292	1	118QH	south_america	0	1	15	-1	0	0	0	0
LOC105199292	4	3QH	south_america	1	5	15	-1.32192809488736	0	0	0	0
LOC105199292	11	118QT	south_america	8	19	15	-0.415037499278844	0	0	0	0
LOC105199292	9	28W	south_america	6	15	15	-0.514573172829758	0	0	0	0
LOC105199292	8	Queen2	north_america	6	14	15	-0.362570079384708	0	0	0	0
LOC105199292	9	Queen1	north_america	7	16	15	-0.321928094887362	0	0	0	0
LOC105199292	20	SBSb-virgin-queens-3	taiwan	24	44	15	0.251538766995964	0	0	0	0
LOC105199292	24	SBSb-virgin-queens-2	taiwan	26	50	15	0.111031312388744	0	0	0	0
LOC105199292	22	SBSb-virgin-queens-1	taiwan	22	44	15	0	0	0	0	0
LOC105199292	5	43QA	south_america	14	19	15	1.32192809488736	0	0	0	0
LOC105199292	5	Queen6	north_america	10	15	15	0.874469117916141	0	0	0	0
LOC105199292	5	Queen4	north_america	5	10	15	0	0	0	0	0
LOC105199292	1	43QT	south_america	9	10	15	2.32192809488736	0	0	0	0
LOC105199292	10	118QA	south_america	8	18	15	-0.289506617194985	0	0	0	0
LOC105199292	7	43CW	south_america	14	21	15	0.906890595608518	0	0	0	0
LOC105199292	5	3QT	south_america	15	20	15	1.41503749927884	0	0	0	0
LOC105199292	1	43QH	south_america	0	1	15	-1	0	0	0	0
LOC105199293	4	114CQT	south_america	2	6	21	-0.736965594166206	0	0	0	0
LOC105199293	10	Queen3	north_america	8	18	21	-0.289506617194985	0	0	0	0
LOC105199293	4	114CQH	south_america	3	7	21	-0.321928094887362	0	0	0	0
LOC105199293	24	114CQA	south_america	23	47	21	-0.0588936890535686	0	0	0	0
LOC105199293	8	Queen1	north_america	6	14	21	-0.362570079384708	0	0	0	0
LOC105199293	0	112BQA	south_america	0	0	21	0	0	0	0	0
LOC105199293	4	43QH	south_america	3	7	21	-0.321928094887362	0	0	0	0
LOC105199293	11	112BQH	south_america	7	18	21	-0.584962500721156	0	0	0	0
LOC105199293	17	Queen4	north_america	13	30	21	-0.362570079384708	0	0	0	0
LOC105199293	31	112W	south_america	13	44	21	-1.1926450779424	0	0	0	0
LOC105199293	31	104W	south_america	11	42	21	-1.41503749927884	0	0	0	0
LOC105199293	16	43CW	south_america	6	22	21	-1.28010791919274	0	0	0	0
LOC105199293	22	Queen2	north_america	15	37	21	-0.523561956057013	0	0	0	0
LOC105199293	16	SBSb-virgin-queens-3	taiwan	9	25	21	-0.765534746362977	0	0	0	0
LOC105199293	22	43QA	south_america	10	32	21	-1.06413033741972	0	0	0	0
LOC105199293	7	114W	south_america	10	17	21	0.459431618637297	0	0	0	0
LOC105199293	44	111BQT	south_america	53	97	21	0.263034405833794	0	0	0	0
LOC105199293	34	111BQA	south_america	48	82	21	0.485426827170242	0	0	0	0
LOC105199293	7	3QH	south_america	1	8	21	-2	0	0	0	0
LOC105199293	21	118QA	south_america	5	26	21	-1.87446911791614	0	0	0	0
LOC105199293	19	28W	south_america	27	46	21	0.485426827170242	0	0	0	0
LOC105199293	14	112BQT	south_america	16	30	21	0.180572245641821	0	0	0	0
LOC105199293	8	Queen5	north_america	4	12	21	-0.84799690655495	0	0	0	0
LOC105199293	5	3BW	south_america	0	5	21	-2.58496250072116	0	0	0	0
LOC105199293	14	SBSb-virgin-queens-1	taiwan	12	26	21	-0.206450877467426	0	0	0	0
LOC105199293	7	3QT	south_america	12	19	21	0.700439718141092	0	0	0	0
LOC105199293	15	SBSb-virgin-queens-4	taiwan	24	39	21	0.643856189774725	0	0	0	0
LOC105199293	26	118QT	south_america	7	33	21	-1.75488750216347	0	0	0	0
LOC105199293	9	111BQH	south_america	4	13	21	-1	0	0	0	0
LOC105199293	4	118QH	south_america	2	6	21	-0.736965594166206	0	0	0	0
LOC105199293	10	SBSb-virgin-queens-2	taiwan	3	13	21	-1.4594316186373	0	0	0	0
LOC105199293	15	43QT	south_america	5	20	21	-1.41503749927884	0	0	0	0
LOC105199293	9	3QA	south_america	15	24	21	0.678071905112638	0	0	0	0
LOC105199293	8	Queen6	north_america	3	11	21	-1.16992500144231	0	0	0	0
LOC105199295	170	SBSb-virgin-queens-4	taiwan	40	210	54	-2.06030051026781	0	0	0	0
LOC105199295	166	SBSb-virgin-queens-2	taiwan	84	250	54	-0.97431335633635	0	0	0	0
LOC105199295	36	Queen2	north_america	18	54	54	-0.961525852185364	0	0	0	0
LOC105199295	28	Queen1	north_america	14	42	54	-0.951090399519053	0	0	0	0
LOC105199295	34	Queen4	north_america	18	52	54	-0.881355503501381	0	0	0	0
LOC105199295	169	SBSb-virgin-queens-3	taiwan	47	216	54	-1.82442843541655	0	0	0	0
LOC105199295	36	Queen3	north_america	18	54	54	-0.961525852185364	0	0	0	0
LOC105199295	134	SBSb-virgin-queens-1	taiwan	44	178	54	-1.58496250072116	0	0	0	0
LOC105199295	26	Queen5	north_america	17	43	54	-0.584962500721156	0	0	0	0
LOC105199295	28	Queen6	north_america	15	43	54	-0.857980995127572	0	0	0	0
LOC105199296	3	Queen5	north_america	6	9	15.5	0.807354922057604	0	0	0	0
LOC105199296	11	SBSb-virgin-queens-4	taiwan	15	26	15.5	0.415037499278844	0	0	0	0
LOC105199296	6	Queen1	north_america	5	11	15.5	-0.222392421336448	0	0	0	0
LOC105199296	10	SBSb-virgin-queens-2	taiwan	18	28	15.5	0.788495894806288	0	0	0	0
LOC105199296	5	Queen4	north_america	8	13	15.5	0.584962500721156	0	0	0	0
LOC105199296	4	Queen3	north_america	6	10	15.5	0.485426827170242	0	0	0	0
LOC105199296	7	SBSb-virgin-queens-3	taiwan	11	18	15.5	0.584962500721156	0	0	0	0
LOC105199296	8	SBSb-virgin-queens-1	taiwan	25	33	15.5	1.53051471669878	0	0	0	0
LOC105199296	6	Queen6	north_america	4	10	15.5	-0.485426827170242	0	0	0	0
LOC105199296	6	Queen2	north_america	12	18	15.5	0.893084796083488	0	0	0	0
LOC105199297	126	104W	south_america	156	282	75.5	0.305936062119461	0	0	0	0
LOC105199297	26	112BQH	south_america	36	62	75.5	0.454565863465481	0	0	0	0
LOC105199297	1	SBSb-virgin-queens-4	taiwan	2	3	75.5	0.584962500721156	0	0	0	0
LOC105199297	4	Queen6	north_america	4	8	75.5	0	0	0	0	0
LOC105199297	8	3QH	south_america	10	18	75.5	0.289506617194985	0	0	0	0
LOC105199297	3	Queen3	north_america	2	5	75.5	-0.415037499278844	0	0	0	0
LOC105199297	34	3QA	south_america	39	73	75.5	0.192645077942396	0	0	0	0
LOC105199297	12	Queen4	north_america	12	24	75.5	0	0	0	0	0
LOC105199297	37	3QT	south_america	45	82	75.5	0.275634442613427	0	0	0	0
LOC105199297	100	112W	south_america	131	231	75.5	0.386182636606659	0	0	0	0
LOC105199297	64	112BQT	south_america	82	146	75.5	0.35267161831847	0	0	0	0
LOC105199297	211	114CQA	south_america	237	448	75.5	0.166897308744744	0	0	0	0
LOC105199297	2	SBSb-virgin-queens-2	taiwan	2	4	75.5	0	0	0	0	0
LOC105199297	3	Queen5	north_america	2	5	75.5	-0.415037499278844	0	0	0	0
LOC105199297	65	111BQA	south_america	68	133	75.5	0.0641303374197156	0	0	0	0
LOC105199297	171	118QT	south_america	186	357	75.5	0.120629705185539	0	0	0	0
LOC105199297	110	43QT	south_america	115	225	75.5	0.0635651287774661	0	0	0	0
LOC105199297	0	112BQA	south_america	0	0	75.5	0	0	0	0	0
LOC105199297	14	3BW	south_america	14	28	75.5	0	0	0	0	0
LOC105199297	82	111BQT	south_america	100	182	75.5	0.28317205140487	0	0	0	0
LOC105199297	49	28W	south_america	46	95	75.5	-0.0892673380970874	0	0	0	0
LOC105199297	9	SBSb-virgin-queens-1	taiwan	6	15	75.5	-0.514573172829758	0	0	0	0
LOC105199297	94	118QH	south_america	91	185	75.5	-0.0462936522739349	0	0	0	0
LOC105199297	128	43QA	south_america	148	276	75.5	0.207941265038908	0	0	0	0
LOC105199297	22	114W	south_america	22	44	75.5	0	0	0	0	0
LOC105199297	78	114CQT	south_america	116	194	75.5	0.566583971406301	0	0	0	0
LOC105199297	1	Queen1	north_america	1	2	75.5	0	0	0	0	0
LOC105199297	10	Queen2	north_america	6	16	75.5	-0.652076696579693	0	0	0	0
LOC105199297	1	SBSb-virgin-queens-3	taiwan	2	3	75.5	0.584962500721156	0	0	0	0
LOC105199297	66	114CQH	south_america	64	130	75.5	-0.0437213774293179	0	0	0	0
LOC105199297	15	111BQH	south_america	21	36	75.5	0.459431618637297	0	0	0	0
LOC105199297	156	118QA	south_america	153	309	75.5	-0.0278342081967256	0	0	0	0
LOC105199297	114	43CW	south_america	134	248	75.5	0.231325546106456	0	0	0	0
LOC105199297	22	43QH	south_america	56	78	75.5	1.30932805810773	0	0	0	0
LOC105199299	5	Queen5	north_america	3	8	8	-0.584962500721156	0	0	0	0
LOC105199299	1	3QH	south_america	1	2	8	0	0	0	0	0
LOC105199299	7	Queen6	north_america	4	11	8	-0.678071905112638	0	0	0	0
LOC105199299	2	3QA	south_america	2	4	8	0	0	0	0	0
LOC105199299	4	Queen4	north_america	4	8	8	0	0	0	0	0
LOC105199299	6	Queen1	north_america	5	11	8	-0.222392421336448	0	0	0	0
LOC105199299	12	SBSb-virgin-queens-4	taiwan	10	22	8	-0.241008099503795	0	0	0	0
LOC105199299	4	43QA	south_america	4	8	8	0	0	0	0	0
LOC105199299	5	3QT	south_america	2	7	8	-1	0	0	0	0
LOC105199299	1	111BQH	south_america	2	3	8	0.584962500721156	0	0	0	0
LOC105199299	6	114CQA	south_america	3	9	8	-0.807354922057604	0	0	0	0
LOC105199299	0	112BQA	south_america	0	0	8	0	0	0	0	0
LOC105199299	5	Queen2	north_america	4	9	8	-0.263034405833794	0	0	0	0
LOC105199299	4	28W	south_america	4	8	8	0	0	0	0	0
LOC105199299	6	118QT	south_america	2	8	8	-1.22239242133645	0	0	0	0
LOC105199299	0	3BW	south_america	2	2	8	1.58496250072116	0	0	0	0
LOC105199299	1	114W	south_america	0	1	8	-1	0	0	0	0
LOC105199299	10	SBSb-virgin-queens-2	taiwan	7	17	8	-0.459431618637297	0	0	0	0
LOC105199299	1	114CQT	south_america	1	2	8	0	0	0	0	0
LOC105199299	7	111BQT	south_america	10	17	8	0.459431618637297	0	0	0	0
LOC105199299	5	SBSb-virgin-queens-1	taiwan	3	8	8	-0.584962500721156	0	0	0	0
LOC105199299	5	Queen3	north_america	4	9	8	-0.263034405833794	0	0	0	0
LOC105199299	15	111BQA	south_america	19	34	8	0.321928094887362	0	0	0	0
LOC105199299	2	43CW	south_america	3	5	8	0.415037499278844	0	0	0	0
LOC105199299	7	112BQT	south_america	3	10	8	-1	0	0	0	0
LOC105199299	2	112BQH	south_america	0	2	8	-1.58496250072116	0	0	0	0
LOC105199299	4	118QA	south_america	4	8	8	0	0	0	0	0
LOC105199299	12	SBSb-virgin-queens-3	taiwan	8	20	8	-0.53051471669878	0	0	0	0
LOC105199299	3	43QT	south_america	0	3	8	-2	0	0	0	0
LOC105199299	8	104W	south_america	4	12	8	-0.84799690655495	0	0	0	0
LOC105199299	1	114CQH	south_america	2	3	8	0.584962500721156	0	0	0	0
LOC105199299	2	112W	south_america	2	4	8	0	0	0	0	0
LOC105199299	3	43QH	south_america	1	4	8	-1	0	0	0	0
LOC105199299	3	118QH	south_america	1	4	8	-1	0	0	0	0
LOC105199302	4	Queen3	north_america	2	6	39	-0.736965594166206	0	0	0	0
LOC105199302	37	118QH	south_america	63	100	39	0.752072486556414	0	0	0	0
LOC105199302	3	Queen2	north_america	7	10	39	1	0	0	0	0
LOC105199302	26	112BQT	south_america	32	58	39	0.289506617194985	0	0	0	0
LOC105199302	12	111BQA	south_america	24	36	39	0.943416471633633	0	0	0	0
LOC105199302	1	Queen1	north_america	2	3	39	0.584962500721156	0	0	0	0
LOC105199302	11	112BQH	south_america	12	23	39	0.115477217419936	0	0	0	0
LOC105199302	30	114CQH	south_america	34	64	39	0.175086706558091	0	0	0	0
LOC105199302	22	114CQA	south_america	18	40	39	-0.275634442613427	0	0	0	0
LOC105199302	4	Queen6	north_america	4	8	39	0	0	0	0	0
LOC105199302	34	28W	south_america	33	67	39	-0.0418201756946271	0	0	0	0
LOC105199302	0	112BQA	south_america	0	0	39	0	0	0	0	0
LOC105199302	24	43QT	south_america	42	66	39	0.782408564927373	0	0	0	0
LOC105199302	34	112W	south_america	36	70	39	0.0801703486839834	0	0	0	0
LOC105199302	14	SBSb-virgin-queens-3	taiwan	19	33	39	0.415037499278844	0	0	0	0
LOC105199302	4	Queen4	north_america	5	9	39	0.263034405833794	0	0	0	0
LOC105199302	58	104W	south_america	59	117	39	0.0242475462466772	0	0	0	0
LOC105199302	8	43QA	south_america	10	18	39	0.289506617194985	0	0	0	0
LOC105199302	21	SBSb-virgin-queens-2	taiwan	24	45	39	0.184424571137428	0	0	0	0
LOC105199302	14	SBSb-virgin-queens-4	taiwan	14	28	39	0	0	0	0	0
LOC105199302	16	118QA	south_america	22	38	39	0.436099114806674	0	0	0	0
LOC105199302	3	Queen5	north_america	3	6	39	0	0	0	0	0
LOC105199302	17	3QH	south_america	28	45	39	0.68805599368526	0	0	0	0
LOC105199302	34	111BQT	south_america	46	80	39	0.425305834732671	0	0	0	0
LOC105199302	6	111BQH	south_america	5	11	39	-0.222392421336448	0	0	0	0
LOC105199302	22	114W	south_america	26	48	39	0.231325546106456	0	0	0	0
LOC105199302	44	3QT	south_america	42	86	39	-0.0655883416275767	0	0	0	0
LOC105199302	10	SBSb-virgin-queens-1	taiwan	10	20	39	0	0	0	0	0
LOC105199302	42	114CQT	south_america	29	71	39	-0.519374159093579	0	0	0	0
LOC105199302	28	43CW	south_america	44	72	39	0.633872101202103	0	0	0	0
LOC105199302	49	118QT	south_america	71	120	39	0.526068811667588	0	0	0	0
LOC105199302	6	3BW	south_america	8	14	39	0.362570079384708	0	0	0	0
LOC105199302	22	43QH	south_america	26	48	39	0.231325546106456	0	0	0	0
LOC105199302	12	3QA	south_america	14	26	39	0.206450877467426	0	0	0	0
LOC105199303	6	114CQA	south_america	7	13	10	0.192645077942396	1	0	0	1
LOC105199303	26	SBSb-virgin-queens-1	taiwan	24	50	10	-0.111031312388744	1	0	0	1
LOC105199303	0	112BQA	south_america	0	0	10	0	1	0	0	1
LOC105199303	8	Queen5	north_america	8	16	10	0	1	0	0	1
LOC105199303	2	114W	south_america	2	4	10	0	1	0	0	1
LOC105199303	3	3QT	south_america	4	7	10	0.321928094887362	1	0	0	1
LOC105199303	2	111BQH	south_america	1	3	10	-0.584962500721156	1	0	0	1
LOC105199303	8	111BQT	south_america	10	18	10	0.289506617194985	1	0	0	1
LOC105199303	11	Queen4	north_america	11	22	10	0	1	0	0	1
LOC105199303	6	112BQT	south_america	4	10	10	-0.485426827170242	1	0	0	1
LOC105199303	4	118QA	south_america	2	6	10	-0.736965594166206	1	0	0	1
LOC105199303	3	112BQH	south_america	4	7	10	0.321928094887362	1	0	0	1
LOC105199303	16	111BQA	south_america	13	29	10	-0.280107919192735	1	0	0	1
LOC105199303	2	114CQT	south_america	2	4	10	0	1	0	0	1
LOC105199303	14	Queen2	north_america	10	24	10	-0.447458976971221	1	0	0	1
LOC105199303	7	112W	south_america	6	13	10	-0.192645077942396	1	0	0	1
LOC105199303	8	Queen1	north_america	10	18	10	0.289506617194985	1	0	0	1
LOC105199303	26	SBSb-virgin-queens-2	taiwan	32	58	10	0.289506617194985	1	0	0	1
LOC105199303	12	Queen3	north_america	15	27	10	0.299560281858908	1	0	0	1
LOC105199303	2	43QH	south_america	1	3	10	-0.584962500721156	1	0	0	1
LOC105199303	3	43QT	south_america	6	9	10	0.807354922057604	1	0	0	1
LOC105199303	4	43CW	south_america	4	8	10	0	1	0	0	1
LOC105199303	8	Queen6	north_america	12	20	10	0.53051471669878	1	0	0	1
LOC105199303	2	3QH	south_america	2	4	10	0	1	0	0	1
LOC105199303	9	118QT	south_america	5	14	10	-0.736965594166206	1	0	0	1
LOC105199303	3	104W	south_america	7	10	10	1	1	0	0	1
LOC105199303	2	118QH	south_america	3	5	10	0.415037499278844	1	0	0	1
LOC105199303	24	SBSb-virgin-queens-4	taiwan	26	50	10	0.111031312388744	1	0	0	1
LOC105199303	2	3BW	south_america	1	3	10	-0.584962500721156	1	0	0	1
LOC105199303	5	3QA	south_america	5	10	10	0	1	0	0	1
LOC105199303	1	114CQH	south_america	3	4	10	1	1	0	0	1
LOC105199303	3	43QA	south_america	7	10	10	1	1	0	0	1
LOC105199303	22	SBSb-virgin-queens-3	taiwan	20	42	10	-0.131244533278253	1	0	0	1
LOC105199303	7	28W	south_america	4	11	10	-0.678071905112638	1	0	0	1
LOC105199304	4	114CQT	south_america	5	9	15.5	0.263034405833794	1	0	0	1
LOC105199304	3	118QH	south_america	5	8	15.5	0.584962500721156	1	0	0	1
LOC105199304	2	114CQH	south_america	4	6	15.5	0.736965594166206	1	0	0	1
LOC105199304	22	111BQT	south_america	21	43	15.5	-0.0641303374197156	1	0	0	1
LOC105199304	11	112BQT	south_america	14	25	15.5	0.321928094887362	1	0	0	1
LOC105199304	2	118QA	south_america	7	9	15.5	1.41503749927884	1	0	0	1
LOC105199304	20	SBSb-virgin-queens-3	taiwan	11	31	15.5	-0.807354922057604	1	0	0	1
LOC105199304	4	3QA	south_america	6	10	15.5	0.485426827170242	1	0	0	1
LOC105199304	5	Queen6	north_america	12	17	15.5	1.11547721741994	1	0	0	1
LOC105199304	6	114CQA	south_america	8	14	15.5	0.362570079384708	1	0	0	1
LOC105199304	8	3QH	south_america	8	16	15.5	0	1	0	0	1
LOC105199304	7	Queen5	north_america	8	15	15.5	0.169925001442312	1	0	0	1
LOC105199304	8	Queen3	north_america	16	24	15.5	0.917537839808027	1	0	0	1
LOC105199304	14	118QT	south_america	18	32	15.5	0.341036917835067	1	0	0	1
LOC105199304	2	112BQH	south_america	4	6	15.5	0.736965594166206	1	0	0	1
LOC105199304	2	111BQH	south_america	4	6	15.5	0.736965594166206	1	0	0	1
LOC105199304	2	3BW	south_america	0	2	15.5	-1.58496250072116	1	0	0	1
LOC105199304	12	Queen1	north_america	8	20	15.5	-0.53051471669878	1	0	0	1
LOC105199304	2	43QH	south_america	1	3	15.5	-0.584962500721156	1	0	0	1
LOC105199304	8	104W	south_america	8	16	15.5	0	1	0	0	1
LOC105199304	11	Queen4	north_america	6	17	15.5	-0.777607578663552	1	0	0	1
LOC105199304	32	SBSb-virgin-queens-2	taiwan	32	64	15.5	0	1	0	0	1
LOC105199304	0	112BQA	south_america	0	0	15.5	0	1	0	0	1
LOC105199304	14	111BQA	south_america	16	30	15.5	0.180572245641821	1	0	0	1
LOC105199304	4	28W	south_america	10	14	15.5	1.13750352374994	1	0	0	1
LOC105199304	6	112W	south_america	6	12	15.5	0	1	0	0	1
LOC105199304	14	3QT	south_america	10	24	15.5	-0.447458976971221	1	0	0	1
LOC105199304	7	114W	south_america	8	15	15.5	0.169925001442312	1	0	0	1
LOC105199304	34	SBSb-virgin-queens-1	taiwan	49	83	15.5	0.514573172829758	1	0	0	1
LOC105199304	6	43QA	south_america	8	14	15.5	0.362570079384708	1	0	0	1
LOC105199304	10	Queen2	north_america	18	28	15.5	0.788495894806288	1	0	0	1
LOC105199304	2	43CW	south_america	6	8	15.5	1.22239242133645	1	0	0	1
LOC105199304	14	SBSb-virgin-queens-4	taiwan	20	34	15.5	0.485426827170242	1	0	0	1
LOC105199304	8	43QT	south_america	11	19	15.5	0.415037499278844	1	0	0	1
LOC105199307	18	111BQA	south_america	14	32	9	-0.341036917835067	0	0	0	0
LOC105199307	0	112BQA	south_america	0	0	9	0	0	0	0	0
LOC105199307	1	SBSb-virgin-queens-3	taiwan	2	3	9	0.584962500721156	0	0	0	0
LOC105199307	13	111BQT	south_america	21	34	9	0.652076696579693	0	0	0	0
LOC105199307	8	118QA	south_america	10	18	9	0.289506617194985	0	0	0	0
LOC105199307	3	43QT	south_america	8	11	9	1.16992500144231	0	0	0	0
LOC105199307	2	Queen6	north_america	3	5	9	0.415037499278844	0	0	0	0
LOC105199307	2	Queen5	north_america	5	7	9	1	0	0	0	0
LOC105199307	6	Queen3	north_america	5	11	9	-0.222392421336448	0	0	0	0
LOC105199307	0	111BQH	south_america	3	3	9	2	0	0	0	0
LOC105199307	1	112BQH	south_america	2	3	9	0.584962500721156	0	0	0	0
LOC105199307	16	SBSb-virgin-queens-4	taiwan	13	29	9	-0.280107919192735	0	0	0	0
LOC105199307	15	104W	south_america	9	24	9	-0.678071905112638	0	0	0	0
LOC105199307	6	3QA	south_america	6	12	9	0	0	0	0	0
LOC105199307	4	43QA	south_america	9	13	9	1	0	0	0	0
LOC105199307	1	3QH	south_america	2	3	9	0.584962500721156	0	0	0	0
LOC105199307	2	114W	south_america	0	2	9	-1.58496250072116	0	0	0	0
LOC105199307	3	112BQT	south_america	3	6	9	0	0	0	0	0
LOC105199307	3	118QH	south_america	1	4	9	-1	0	0	0	0
LOC105199307	5	43CW	south_america	16	21	9	1.50250034052918	0	0	0	0
LOC105199307	5	Queen2	north_america	8	13	9	0.584962500721156	0	0	0	0
LOC105199307	15	SBSb-virgin-queens-2	taiwan	11	26	9	-0.415037499278844	0	0	0	0
LOC105199307	2	Queen1	north_america	4	6	9	0.736965594166206	0	0	0	0
LOC105199307	18	114CQA	south_america	15	33	9	-0.247927513443586	0	0	0	0
LOC105199307	6	Queen4	north_america	6	12	9	0	0	0	0	0
LOC105199307	23	112W	south_america	14	37	9	-0.678071905112638	0	0	0	0
LOC105199307	3	SBSb-virgin-queens-1	taiwan	2	5	9	-0.415037499278844	0	0	0	0
LOC105199307	1	3QT	south_america	3	4	9	1	0	0	0	0
LOC105199307	5	3BW	south_america	1	6	9	-1.58496250072116	0	0	0	0
LOC105199307	22	28W	south_america	27	49	9	0.283792966000591	0	0	0	0
LOC105199307	1	118QT	south_america	13	14	9	2.8073549220576	0	0	0	0
LOC105199307	3	114CQH	south_america	0	3	9	-2	0	0	0	0
LOC105199307	0	43QH	south_america	0	0	9	0	0	0	0	0
LOC105199307	1	114CQT	south_america	4	5	9	1.32192809488736	0	0	0	0
LOC105199309	64	43QA	south_america	87	151	25	0.437063805608843	0	0	0	0
LOC105199309	74	111BQA	south_america	104	178	25	0.485426827170242	0	0	0	0
LOC105199309	34	118QA	south_america	32	66	25	-0.0848888975865131	0	0	0	0
LOC105199309	52	43CW	south_america	68	120	25	0.38060400221497	0	0	0	0
LOC105199309	8	118QH	south_america	9	17	25	0.15200309344505	0	0	0	0
LOC105199309	7	114CQT	south_america	10	17	25	0.459431618637297	0	0	0	0
LOC105199309	32	114CQA	south_america	38	70	25	0.241008099503795	0	0	0	0
LOC105199309	3	Queen6	north_america	2	5	25	-0.415037499278844	0	0	0	0
LOC105199309	82	28W	south_america	115	197	25	0.482941563780647	0	0	0	0
LOC105199309	18	114W	south_america	22	40	25	0.275634442613427	0	0	0	0
LOC105199309	55	104W	south_america	72	127	25	0.382469636822413	0	0	0	0
LOC105199309	21	3QT	south_america	50	71	25	1.2129937233342	0	0	0	0
LOC105199309	2	Queen4	north_america	4	6	25	0.736965594166206	0	0	0	0
LOC105199309	17	Queen5	north_america	23	40	25	0.415037499278844	0	0	0	0
LOC105199309	2	43QH	south_america	2	4	25	0	0	0	0	0
LOC105199309	5	Queen3	north_america	5	10	25	0	0	0	0	0
LOC105199309	10	3BW	south_america	4	14	25	-1.13750352374993	0	0	0	0
LOC105199309	4	3QH	south_america	5	9	25	0.263034405833794	0	0	0	0
LOC105199309	24	112BQT	south_america	28	52	25	0.214124805352847	0	0	0	0
LOC105199309	64	111BQT	south_america	92	156	25	0.516790998079577	0	0	0	0
LOC105199309	15	43QT	south_america	18	33	25	0.247927513443586	0	0	0	0
LOC105199309	2	111BQH	south_america	5	7	25	1	0	0	0	0
LOC105199309	1	Queen1	north_america	1	2	25	0	0	0	0	0
LOC105199309	4	114CQH	south_america	4	8	25	0	0	0	0	0
LOC105199309	51	112W	south_america	84	135	25	0.70895121799661	0	0	0	0
LOC105199309	50	3QA	south_america	75	125	25	0.57550217147209	0	0	0	0
LOC105199309	8	SBSb-virgin-queens-1	taiwan	7	15	25	-0.169925001442312	0	0	0	0
LOC105199309	1	SBSb-virgin-queens-2	taiwan	1	2	25	0	0	0	0	0
LOC105199309	26	Queen2	north_america	30	56	25	0.199308808223407	0	0	0	0
LOC105199309	2	112BQH	south_america	6	8	25	1.22239242133645	0	0	0	0
LOC105199309	40	118QT	south_america	50	90	25	0.314873337353412	0	0	0	0
LOC105199309	0	112BQA	south_america	0	0	25	0	0	0	0	0
LOC105199309	2	SBSb-virgin-queens-3	taiwan	2	4	25	0	0	0	0	0
LOC105199309	2	SBSb-virgin-queens-4	taiwan	1	3	25	-0.584962500721156	0	0	0	0
LOC105199310	19	28W	south_america	18	37	14	-0.0740005814437769	0	0	0	0
LOC105199310	9	104W	south_america	10	19	14	0.137503523749935	0	0	0	0
LOC105199310	8	3QT	south_america	9	17	14	0.15200309344505	0	0	0	0
LOC105199310	13	111BQT	south_america	10	23	14	-0.347923303420307	0	0	0	0
LOC105199310	0	3BW	south_america	0	0	14	0	0	0	0	0
LOC105199310	12	43QA	south_america	7	19	14	-0.700439718141092	0	0	0	0
LOC105199310	23	111BQA	south_america	15	38	14	-0.584962500721156	0	0	0	0
LOC105199310	1	3QH	south_america	0	1	14	-1	0	0	0	0
LOC105199310	10	43CW	south_america	4	14	14	-1.13750352374993	0	0	0	0
LOC105199310	6	118QT	south_america	10	16	14	0.652076696579693	0	0	0	0
LOC105199310	37	SBSb-virgin-queens-2	taiwan	22	59	14	-0.724365557386573	0	0	0	0
LOC105199310	5	43QH	south_america	2	7	14	-1	0	0	0	0
LOC105199310	5	Queen5	north_america	3	8	14	-0.584962500721156	0	0	0	0
LOC105199310	44	SBSb-virgin-queens-1	taiwan	28	72	14	-0.633872101202102	0	0	0	0
LOC105199310	2	114CQT	south_america	1	3	14	-0.584962500721156	0	0	0	0
LOC105199310	7	114W	south_america	7	14	14	0	0	0	0	0
LOC105199310	5	3QA	south_america	5	10	14	0	0	0	0	0
LOC105199310	16	112W	south_america	13	29	14	-0.280107919192735	0	0	0	0
LOC105199310	6	118QH	south_america	4	10	14	-0.485426827170242	0	0	0	0
LOC105199310	11	118QA	south_america	10	21	14	-0.125530882083859	0	0	0	0
LOC105199310	8	Queen6	north_america	4	12	14	-0.84799690655495	0	0	0	0
LOC105199310	0	112BQA	south_america	0	0	14	0	0	0	0	0
LOC105199310	5	Queen4	north_america	3	8	14	-0.584962500721156	0	0	0	0
LOC105199310	10	43QT	south_america	5	15	14	-0.874469117916141	0	0	0	0
LOC105199310	34	SBSb-virgin-queens-4	taiwan	27	61	14	-0.321928094887362	0	0	0	0
LOC105199310	6	Queen2	north_america	5	11	14	-0.222392421336448	0	0	0	0
LOC105199310	5	114CQH	south_america	2	7	14	-1	0	0	0	0
LOC105199310	33	SBSb-virgin-queens-3	taiwan	19	52	14	-0.765534746362977	0	0	0	0
LOC105199310	3	111BQH	south_america	6	9	14	0.807354922057604	0	0	0	0
LOC105199310	27	114CQA	south_america	20	47	14	-0.415037499278844	0	0	0	0
LOC105199310	14	112BQT	south_america	12	26	14	-0.206450877467426	0	0	0	0
LOC105199310	7	Queen3	north_america	3	10	14	-1	0	0	0	0
LOC105199310	7	Queen1	north_america	6	13	14	-0.192645077942396	0	0	0	0
LOC105199310	5	112BQH	south_america	5	10	14	0	0	0	0	0
LOC105199311	10	3QA	south_america	12	22	24	0.241008099503795	0	0	0	0
LOC105199311	15	Queen4	north_america	11	26	24	-0.415037499278844	0	0	0	0
LOC105199311	19	43QT	south_america	11	30	24	-0.736965594166206	0	0	0	0
LOC105199311	6	3BW	south_america	4	10	24	-0.485426827170242	0	0	0	0
LOC105199311	0	112BQA	south_america	0	0	24	0	0	0	0	0
LOC105199311	24	114CQA	south_america	22	46	24	-0.120294233717712	0	0	0	0
LOC105199311	10	43CW	south_america	14	24	24	0.447458976971221	0	0	0	0
LOC105199311	12	Queen1	north_america	12	24	24	0	0	0	0	0
LOC105199311	20	111BQT	south_america	24	44	24	0.251538766995964	0	0	0	0
LOC105199311	40	SBSb-virgin-queens-4	taiwan	30	70	24	-0.403355694231209	0	0	0	0
LOC105199311	6	43QH	south_america	2	8	24	-1.22239242133645	0	0	0	0
LOC105199311	6	112BQH	south_america	6	12	24	0	0	0	0	0
LOC105199311	26	SBSb-virgin-queens-1	taiwan	31	57	24	0.245112497836531	0	0	0	0
LOC105199311	32	118QT	south_america	20	52	24	-0.652076696579693	0	0	0	0
LOC105199311	23	112BQT	south_america	18	41	24	-0.337034987277571	0	0	0	0
LOC105199311	16	43QA	south_america	18	34	24	0.160464672193246	0	0	0	0
LOC105199311	6	114CQH	south_america	4	10	24	-0.485426827170242	0	0	0	0
LOC105199311	14	Queen2	north_america	12	26	24	-0.206450877467426	0	0	0	0
LOC105199311	22	112W	south_america	10	32	24	-1.06413033741972	0	0	0	0
LOC105199311	10	Queen5	north_america	9	19	24	-0.137503523749935	0	0	0	0
LOC105199311	12	118QH	south_america	10	22	24	-0.241008099503795	0	0	0	0
LOC105199311	20	28W	south_america	17	37	24	-0.222392421336448	0	0	0	0
LOC105199311	13	Queen3	north_america	8	21	24	-0.637429920615292	0	0	0	0
LOC105199311	32	111BQA	south_america	36	68	24	0.165059246270496	0	0	0	0
LOC105199311	10	3QT	south_america	9	19	24	-0.137503523749935	0	0	0	0
LOC105199311	17	104W	south_america	16	33	24	-0.082462160191973	0	0	0	0
LOC105199311	10	Queen6	north_america	9	19	24	-0.137503523749935	0	0	0	0
LOC105199311	39	SBSb-virgin-queens-2	taiwan	34	73	24	-0.192645077942396	0	0	0	0
LOC105199311	34	SBSb-virgin-queens-3	taiwan	25	59	24	-0.428843298803874	0	0	0	0
LOC105199311	6	3QH	south_america	6	12	24	0	0	0	0	0
LOC105199311	7	114CQT	south_america	4	11	24	-0.678071905112638	0	0	0	0
LOC105199311	12	118QA	south_america	8	20	24	-0.53051471669878	0	0	0	0
LOC105199311	4	111BQH	south_america	3	7	24	-0.321928094887362	0	0	0	0
LOC105199311	14	114W	south_america	10	24	24	-0.447458976971221	0	0	0	0
LOC105199313	16	3QH	south_america	9	25	42.5	-0.765534746362977	0	0	0	0
LOC105199313	42	3QA	south_america	50	92	42.5	0.246160587269398	0	0	0	0
LOC105199313	60	28W	south_america	54	114	42.5	-0.149377624038227	0	0	0	0
LOC105199313	25	43CW	south_america	28	53	42.5	0.15754127698648	0	0	0	0
LOC105199313	24	118QT	south_america	18	42	42.5	-0.395928676331139	0	0	0	0
LOC105199313	8	114CQT	south_america	13	21	42.5	0.637429920615292	0	0	0	0
LOC105199313	8	114CQH	south_america	12	20	42.5	0.53051471669878	0	0	0	0
LOC105199313	27	111BQA	south_america	33	60	42.5	0.280107919192735	0	0	0	0
LOC105199313	6	3BW	south_america	12	18	42.5	0.893084796083488	0	0	0	0
LOC105199313	29	SBSb-virgin-queens-3	taiwan	14	43	42.5	-1	0	0	0	0
LOC105199313	38	43QA	south_america	40	78	42.5	0.0721497857558354	0	0	0	0
LOC105199313	50	104W	south_america	36	86	42.5	-0.462971976342546	0	0	0	0
LOC105199313	16	Queen5	north_america	20	36	42.5	0.304854581528421	0	0	0	0
LOC105199313	24	Queen1	north_america	27	51	42.5	0.16349873228288	0	0	0	0
LOC105199313	18	118QH	south_america	8	26	42.5	-1.07800251200127	0	0	0	0
LOC105199313	31	114W	south_america	33	64	42.5	0.0874628412503394	0	0	0	0
LOC105199313	91	SBSb-virgin-queens-4	taiwan	90	181	42.5	-0.0157673158583167	0	0	0	0
LOC105199313	14	112BQH	south_america	20	34	42.5	0.485426827170242	0	0	0	0
LOC105199313	14	Queen6	north_america	27	41	42.5	0.900464326449086	0	0	0	0
LOC105199313	18	43QH	south_america	2	20	42.5	-2.66296501272243	0	0	0	0
LOC105199313	26	3QT	south_america	32	58	42.5	0.289506617194985	0	0	0	0
LOC105199313	48	114CQA	south_america	36	84	42.5	-0.405256478486259	0	0	0	0
LOC105199313	43	111BQT	south_america	48	91	42.5	0.155278225477911	0	0	0	0
LOC105199313	32	118QA	south_america	26	58	42.5	-0.289506617194985	0	0	0	0
LOC105199313	2	Queen4	north_america	1	3	42.5	-0.584962500721156	0	0	0	0
LOC105199313	33	112BQT	south_america	45	78	42.5	0.436099114806674	0	0	0	0
LOC105199313	0	112BQA	south_america	0	0	42.5	0	0	0	0	0
LOC105199313	19	Queen2	north_america	19	38	42.5	0	0	0	0	0
LOC105199313	10	Queen3	north_america	8	18	42.5	-0.289506617194985	0	0	0	0
LOC105199313	52	112W	south_america	68	120	42.5	0.38060400221497	0	0	0	0
LOC105199313	64	SBSb-virgin-queens-1	taiwan	76	140	42.5	0.244418727666447	0	0	0	0
LOC105199313	1	SBSb-virgin-queens-2	taiwan	2	3	42.5	0.584962500721156	0	0	0	0
LOC105199313	20	43QT	south_america	14	34	42.5	-0.485426827170242	0	0	0	0
LOC105199313	14	111BQH	south_america	10	24	42.5	-0.447458976971221	0	0	0	0
LOC105199314	2	Queen6	north_america	2	4	7	0	0	0	0	0
LOC105199314	1	Queen3	north_america	2	3	7	0.584962500721156	0	0	0	0
LOC105199314	2	104W	south_america	4	6	7	0.736965594166206	0	0	0	0
LOC105199314	2	Queen4	north_america	3	5	7	0.415037499278844	0	0	0	0
LOC105199314	0	3QH	south_america	4	4	7	2.32192809488736	0	0	0	0
LOC105199314	6	SBSb-virgin-queens-4	taiwan	3	9	7	-0.807354922057604	0	0	0	0
LOC105199314	5	SBSb-virgin-queens-3	taiwan	1	6	7	-1.58496250072116	0	0	0	0
LOC105199314	6	SBSb-virgin-queens-2	taiwan	2	8	7	-1.22239242133645	0	0	0	0
LOC105199314	1	Queen5	north_america	4	5	7	1.32192809488736	0	0	0	0
LOC105199314	24	28W	south_america	22	46	7	-0.120294233717712	0	0	0	0
LOC105199314	5	3QT	south_america	4	9	7	-0.263034405833794	0	0	0	0
LOC105199314	7	111BQA	south_america	8	15	7	0.169925001442312	0	0	0	0
LOC105199314	12	112BQT	south_america	32	44	7	1.34395440121736	0	0	0	0
LOC105199314	4	Queen2	north_america	1	5	7	-1.32192809488736	0	0	0	0
LOC105199314	0	112BQA	south_america	0	0	7	0	0	0	0	0
LOC105199314	0	111BQT	south_america	4	4	7	2.32192809488736	0	0	0	0
LOC105199314	14	43CW	south_america	16	30	7	0.180572245641821	0	0	0	0
LOC105199314	6	112BQH	south_america	4	10	7	-0.485426827170242	0	0	0	0
LOC105199314	17	112W	south_america	34	51	7	0.959358015502654	0	0	0	0
LOC105199314	1	118QT	south_america	2	3	7	0.584962500721156	0	0	0	0
LOC105199314	3	3BW	south_america	7	10	7	1	0	0	0	0
LOC105199314	4	SBSb-virgin-queens-1	taiwan	1	5	7	-1.32192809488736	0	0	0	0
LOC105199314	2	43QT	south_america	6	8	7	1.22239242133645	0	0	0	0
LOC105199314	14	3QA	south_america	20	34	7	0.485426827170242	0	0	0	0
LOC105199314	1	114CQH	south_america	5	6	7	1.58496250072116	0	0	0	0
LOC105199314	20	114CQA	south_america	14	34	7	-0.485426827170242	0	0	0	0
LOC105199314	2	Queen1	north_america	2	4	7	0	0	0	0	0
LOC105199314	5	111BQH	south_america	1	6	7	-1.58496250072116	0	0	0	0
LOC105199314	4	43QH	south_america	1	5	7	-1.32192809488736	0	0	0	0
LOC105199314	14	118QA	south_america	12	26	7	-0.206450877467426	0	0	0	0
LOC105199314	0	114W	south_america	2	2	7	1.58496250072116	0	0	0	0
LOC105199314	4	118QH	south_america	4	8	7	0	0	0	0	0
LOC105199314	16	43QA	south_america	24	40	7	0.556393348524385	0	0	0	0
LOC105199314	8	114CQT	south_america	8	16	7	0	0	0	0	0
LOC105199316	10	SBSb-virgin-queens-2	taiwan	6	16	13.5	-0.652076696579693	0	0	0	0
LOC105199316	0	SBSb-virgin-queens-1	taiwan	1	1	13.5	1	0	0	0	0
LOC105199316	12	Queen3	north_america	4	16	13.5	-1.37851162325373	0	0	0	0
LOC105199316	1	SBSb-virgin-queens-4	taiwan	1	2	13.5	0	0	0	0	0
LOC105199316	11	SBSb-virgin-queens-3	taiwan	2	13	13.5	-2	0	0	0	0
LOC105199316	10	Queen1	north_america	3	13	13.5	-1.4594316186373	0	0	0	0
LOC105199316	11	Queen6	north_america	7	18	13.5	-0.584962500721156	0	0	0	0
LOC105199316	10	Queen4	north_america	3	13	13.5	-1.4594316186373	0	0	0	0
LOC105199316	10	Queen2	north_america	6	16	13.5	-0.652076696579693	0	0	0	0
LOC105199316	10	Queen5	north_america	4	14	13.5	-1.13750352374993	0	0	0	0
LOC105199318	10	SBSb-virgin-queens-3	taiwan	13	23	22.5	0.347923303420307	0	0	0	0
LOC105199318	14	SBSb-virgin-queens-2	taiwan	16	30	22.5	0.180572245641821	0	0	0	0
LOC105199318	11	Queen1	north_america	11	22	22.5	0	0	0	0	0
LOC105199318	12	SBSb-virgin-queens-4	taiwan	15	27	22.5	0.299560281858908	0	0	0	0
LOC105199318	6	Queen4	north_america	8	14	22.5	0.362570079384708	0	0	0	0
LOC105199318	12	Queen3	north_america	20	32	22.5	0.691877704637668	0	0	0	0
LOC105199318	8	Queen5	north_america	12	20	22.5	0.53051471669878	0	0	0	0
LOC105199318	6	SBSb-virgin-queens-1	taiwan	9	15	22.5	0.514573172829758	0	0	0	0
LOC105199318	6	Queen6	north_america	11	17	22.5	0.777607578663552	0	0	0	0
LOC105199318	14	Queen2	north_america	13	27	22.5	-0.0995356735509144	0	0	0	0
LOC105199328	7	Queen3	north_america	9	16	27	0.321928094887362	0	0	0	0
LOC105199328	20	SBSb-virgin-queens-1	taiwan	27	47	27	0.415037499278844	0	0	0	0
LOC105199328	39	SBSb-virgin-queens-2	taiwan	30	69	27	-0.367731784500487	0	0	0	0
LOC105199328	6	Queen1	north_america	7	13	27	0.192645077942396	0	0	0	0
LOC105199328	3	Queen5	north_america	3	6	27	0	0	0	0	0
LOC105199328	12	Queen4	north_america	12	24	27	0	0	0	0	0
LOC105199328	36	SBSb-virgin-queens-4	taiwan	62	98	27	0.767826557870967	0	0	0	0
LOC105199328	20	SBSb-virgin-queens-3	taiwan	35	55	27	0.777607578663552	0	0	0	0
LOC105199328	5	Queen6	north_america	5	10	27	0	0	0	0	0
LOC105199328	12	Queen2	north_america	18	30	27	0.547487795302493	0	0	0	0
LOC105199337	11	SBSb-virgin-queens-2	taiwan	14	25	25	0.321928094887362	0	0	0	0
LOC105199337	10	Queen5	north_america	15	25	25	0.540568381362703	0	0	0	0
LOC105199337	14	Queen3	north_america	11	25	25	-0.321928094887362	0	0	0	0
LOC105199337	12	Queen4	north_america	10	22	25	-0.241008099503795	0	0	0	0
LOC105199337	12	SBSb-virgin-queens-3	taiwan	18	30	25	0.547487795302493	0	0	0	0
LOC105199337	11	SBSb-virgin-queens-1	taiwan	21	32	25	0.874469117916141	0	0	0	0
LOC105199337	10	Queen6	north_america	15	25	25	0.540568381362703	0	0	0	0
LOC105199337	14	Queen2	north_america	16	30	25	0.180572245641821	0	0	0	0
LOC105199337	13	Queen1	north_america	12	25	25	-0.106915203916512	0	0	0	0
LOC105199337	29	SBSb-virgin-queens-4	taiwan	22	51	25	-0.383328639551506	0	0	0	0
LOC105199338	1	Queen6	north_america	4	5	16	1.32192809488736	0	0	0	0
LOC105199338	2	111BQH	south_america	2	4	16	0	0	0	0	0
LOC105199338	3	112BQH	south_america	0	3	16	-2	0	0	0	0
LOC105199338	62	111BQA	south_america	39	101	16	-0.655351828612554	0	0	0	0
LOC105199338	17	SBSb-virgin-queens-1	taiwan	8	25	16	-1	0	0	0	0
LOC105199338	0	112BQA	south_america	0	0	16	0	0	0	0	0
LOC105199338	14	SBSb-virgin-queens-3	taiwan	19	33	16	0.415037499278844	0	0	0	0
LOC105199338	16	SBSb-virgin-queens-4	taiwan	25	41	16	0.612976876890753	0	0	0	0
LOC105199338	17	28W	south_america	16	33	16	-0.082462160191973	0	0	0	0
LOC105199338	13	112BQT	south_america	4	17	16	-1.48542682717024	0	0	0	0
LOC105199338	7	Queen3	north_america	9	16	16	0.321928094887362	0	0	0	0
LOC105199338	20	112W	south_america	12	32	16	-0.691877704637668	0	0	0	0
LOC105199338	4	43QH	south_america	3	7	16	-0.321928094887362	0	0	0	0
LOC105199338	8	Queen5	north_america	3	11	16	-1.16992500144231	0	0	0	0
LOC105199338	17	111BQT	south_america	16	33	16	-0.082462160191973	0	0	0	0
LOC105199338	11	43QT	south_america	18	29	16	0.662965012722429	0	0	0	0
LOC105199338	22	104W	south_america	18	40	16	-0.275634442613427	0	0	0	0
LOC105199338	14	118QA	south_america	16	30	16	0.180572245641821	0	0	0	0
LOC105199338	38	114CQA	south_america	36	74	16	-0.0759488532332986	0	0	0	0
LOC105199338	10	SBSb-virgin-queens-2	taiwan	17	27	16	0.710493382805015	0	0	0	0
LOC105199338	22	43QA	south_america	16	38	16	-0.436099114806674	0	0	0	0
LOC105199338	16	118QT	south_america	17	33	16	0.082462160191973	0	0	0	0
LOC105199338	5	114CQH	south_america	3	8	16	-0.584962500721156	0	0	0	0
LOC105199338	15	43CW	south_america	12	27	16	-0.299560281858908	0	0	0	0
LOC105199338	4	114CQT	south_america	4	8	16	0	0	0	0	0
LOC105199338	6	Queen4	north_america	7	13	16	0.192645077942396	0	0	0	0
LOC105199338	5	3QA	south_america	10	15	16	0.874469117916141	0	0	0	0
LOC105199338	6	Queen2	north_america	8	14	16	0.362570079384708	0	0	0	0
LOC105199338	8	118QH	south_america	6	14	16	-0.362570079384708	0	0	0	0
LOC105199338	10	114W	south_america	6	16	16	-0.652076696579693	0	0	0	0
LOC105199338	2	3QH	south_america	2	4	16	0	0	0	0	0
LOC105199338	3	3QT	south_america	12	15	16	1.70043971814109	0	0	0	0
LOC105199338	2	3BW	south_america	1	3	16	-0.584962500721156	0	0	0	0
LOC105199338	1	Queen1	north_america	7	8	16	2	0	0	0	0
LOC105199340	6	Queen5	north_america	6	12	23	0	0	0	0	0
LOC105199340	9	Queen4	north_america	10	19	23	0.137503523749935	0	0	0	0
LOC105199340	11	Queen3	north_america	10	21	23	-0.125530882083859	0	0	0	0
LOC105199340	12	Queen2	north_america	17	29	23	0.46948528330122	0	0	0	0
LOC105199340	16	SBSb-virgin-queens-2	taiwan	21	37	23	0.371968777386958	0	0	0	0
LOC105199340	7	SBSb-virgin-queens-1	taiwan	9	16	23	0.321928094887362	0	0	0	0
LOC105199340	11	Queen6	north_america	14	25	23	0.321928094887362	0	0	0	0
LOC105199340	16	SBSb-virgin-queens-3	taiwan	12	28	23	-0.387023123109247	0	0	0	0
LOC105199340	19	SBSb-virgin-queens-4	taiwan	16	35	23	-0.234465253637023	0	0	0	0
LOC105199340	5	Queen1	north_america	8	13	23	0.584962500721156	0	0	0	0
LOC105199341	3	SBSb-virgin-queens-1	taiwan	1	4	11.5	-1	0	0	0	0
LOC105199341	21	Queen4	north_america	20	41	11.5	-0.0671141958585369	0	0	0	0
LOC105199341	8	Queen3	north_america	3	11	11.5	-1.16992500144231	0	0	0	0
LOC105199341	2	SBSb-virgin-queens-3	taiwan	0	2	11.5	-1.58496250072116	0	0	0	0
LOC105199341	2	Queen5	north_america	10	12	11.5	1.87446911791614	0	0	0	0
LOC105199341	28	Queen6	north_america	10	38	11.5	-1.39854937649027	0	0	0	0
LOC105199341	3	SBSb-virgin-queens-4	taiwan	2	5	11.5	-0.415037499278844	0	0	0	0
LOC105199341	2	Queen2	north_america	3	5	11.5	0.415037499278844	0	0	0	0
LOC105199341	52	SBSb-virgin-queens-2	taiwan	15	67	11.5	-1.7279204545632	0	0	0	0
LOC105199341	24	Queen1	north_america	20	44	11.5	-0.251538766995965	0	0	0	0
LOC105199342	11	112W	south_america	11	22	17	0	0	0	0	0
LOC105199342	6	43QT	south_america	1	7	17	-1.8073549220576	0	0	0	0
LOC105199342	0	114CQT	south_america	3	3	17	2	0	0	0	0
LOC105199342	18	SBSb-virgin-queens-1	taiwan	20	38	17	0.144389909335175	0	0	0	0
LOC105199342	10	112BQT	south_america	4	14	17	-1.13750352374993	0	0	0	0
LOC105199342	2	43QH	south_america	1	3	17	-0.584962500721156	0	0	0	0
LOC105199342	6	Queen5	north_america	12	18	17	0.893084796083488	0	0	0	0
LOC105199342	12	Queen3	north_america	16	28	17	0.387023123109247	0	0	0	0
LOC105199342	17	43QA	south_america	7	24	17	-1.16992500144231	0	0	0	0
LOC105199342	15	3QA	south_america	13	28	17	-0.192645077942396	0	0	0	0
LOC105199342	8	118QH	south_america	6	14	17	-0.362570079384708	0	0	0	0
LOC105199342	18	111BQA	south_america	15	33	17	-0.247927513443586	0	0	0	0
LOC105199342	3	3QH	south_america	0	3	17	-2	0	0	0	0
LOC105199342	10	Queen4	north_america	14	24	17	0.447458976971221	0	0	0	0
LOC105199342	12	43CW	south_america	11	23	17	-0.115477217419936	0	0	0	0
LOC105199342	0	112BQA	south_america	0	0	17	0	0	0	0	0
LOC105199342	12	SBSb-virgin-queens-4	taiwan	26	38	17	1.05444778402238	0	0	0	0
LOC105199342	0	3BW	south_america	0	0	17	0	0	0	0	0
LOC105199342	3	112BQH	south_america	3	6	17	0	0	0	0	0
LOC105199342	2	114CQH	south_america	4	6	17	0.736965594166206	0	0	0	0
LOC105199342	11	118QA	south_america	8	19	17	-0.415037499278844	0	0	0	0
LOC105199342	9	114W	south_america	7	16	17	-0.321928094887362	0	0	0	0
LOC105199342	8	114CQA	south_america	8	16	17	0	0	0	0	0
LOC105199342	4	111BQT	south_america	4	8	17	0	0	0	0	0
LOC105199342	7	3QT	south_america	5	12	17	-0.415037499278844	0	0	0	0
LOC105199342	8	Queen1	north_america	15	23	17	0.830074998557688	0	0	0	0
LOC105199342	11	Queen6	north_america	13	24	17	0.222392421336448	0	0	0	0
LOC105199342	9	28W	south_america	26	35	17	1.43295940727611	0	0	0	0
LOC105199342	4	111BQH	south_america	1	5	17	-1.32192809488736	0	0	0	0
LOC105199342	7	118QT	south_america	3	10	17	-1	0	0	0	0
LOC105199342	9	Queen2	north_america	11	20	17	0.263034405833794	0	0	0	0
LOC105199342	14	SBSb-virgin-queens-2	taiwan	22	36	17	0.616671360448494	0	0	0	0
LOC105199342	4	104W	south_america	3	7	17	-0.321928094887362	0	0	0	0
LOC105199342	17	SBSb-virgin-queens-3	taiwan	25	42	17	0.53051471669878	0	0	0	0
LOC105199343	75	111BQA	south_america	39	114	27	-0.925999418556223	0	0	0	0
LOC105199343	8	43CW	south_america	14	22	27	0.736965594166206	0	0	0	0
LOC105199343	13	43QA	south_america	17	30	27	0.362570079384708	0	0	0	0
LOC105199343	25	112BQT	south_america	22	47	27	-0.176877762084079	0	0	0	0
LOC105199343	2	3QH	south_america	2	4	27	0	0	0	0	0
LOC105199343	12	Queen4	north_america	12	24	27	0	0	0	0	0
LOC105199343	5	118QH	south_america	3	8	27	-0.584962500721156	0	0	0	0
LOC105199343	22	114CQA	south_america	19	41	27	-0.201633861169651	0	0	0	0
LOC105199343	18	28W	south_america	26	44	27	0.506959988719883	0	0	0	0
LOC105199343	14	SBSb-virgin-queens-1	taiwan	16	30	27	0.180572245641821	0	0	0	0
LOC105199343	11	118QT	south_america	13	24	27	0.222392421336448	0	0	0	0
LOC105199343	20	104W	south_america	27	47	27	0.415037499278844	0	0	0	0
LOC105199343	15	Queen6	north_america	19	34	27	0.321928094887362	0	0	0	0
LOC105199343	6	Queen5	north_america	6	12	27	0	0	0	0	0
LOC105199343	3	3BW	south_america	2	5	27	-0.415037499278844	0	0	0	0
LOC105199343	28	SBSb-virgin-queens-3	taiwan	26	54	27	-0.103093492964104	0	0	0	0
LOC105199343	0	112BQA	south_america	0	0	27	0	0	0	0	0
LOC105199343	16	112W	south_america	12	28	27	-0.387023123109247	0	0	0	0
LOC105199343	12	Queen2	north_america	16	28	27	0.387023123109247	0	0	0	0
LOC105199343	7	114CQT	south_america	2	9	27	-1.41503749927884	0	0	0	0
LOC105199343	29	SBSb-virgin-queens-4	taiwan	29	58	27	0	0	0	0	0
LOC105199343	4	114CQH	south_america	2	6	27	-0.736965594166206	0	0	0	0
LOC105199343	5	43QT	south_america	2	7	27	-1	0	0	0	0
LOC105199343	6	Queen1	north_america	12	18	27	0.893084796083488	0	0	0	0
LOC105199343	20	3QT	south_america	15	35	27	-0.39231742277876	0	0	0	0
LOC105199343	16	3QA	south_america	18	34	27	0.160464672193246	0	0	0	0
LOC105199343	10	Queen3	north_america	9	19	27	-0.137503523749935	0	0	0	0
LOC105199343	27	111BQT	south_america	30	57	27	0.146841388329271	0	0	0	0
LOC105199343	1	111BQH	south_america	2	3	27	0.584962500721156	0	0	0	0
LOC105199343	3	112BQH	south_america	2	5	27	-0.415037499278844	0	0	0	0
LOC105199343	19	118QA	south_america	18	37	27	-0.0740005814437769	0	0	0	0
LOC105199343	28	SBSb-virgin-queens-2	taiwan	36	64	27	0.351472370501378	0	0	0	0
LOC105199343	2	43QH	south_america	5	7	27	1	0	0	0	0
LOC105199343	13	114W	south_america	13	26	27	0	0	0	0	0
LOC105199345	23	SBSb-virgin-queens-4	taiwan	39	62	32.5	0.736965594166206	0	0	0	0
LOC105199345	8	Queen3	north_america	13	21	32.5	0.637429920615292	0	0	0	0
LOC105199345	21	SBSb-virgin-queens-1	taiwan	41	62	32.5	0.932885804141463	0	0	0	0
LOC105199345	23	SBSb-virgin-queens-3	taiwan	27	50	32.5	0.222392421336448	0	0	0	0
LOC105199345	24	SBSb-virgin-queens-2	taiwan	36	60	32.5	0.565597175854225	0	0	0	0
LOC105199345	6	Queen5	north_america	11	17	32.5	0.777607578663552	0	0	0	0
LOC105199345	12	Queen4	north_america	22	34	32.5	0.823122237915921	0	0	0	0
LOC105199345	5	Queen2	north_america	9	14	32.5	0.736965594166206	0	0	0	0
LOC105199345	5	Queen1	north_america	19	24	32.5	1.73696559416621	0	0	0	0
LOC105199345	15	Queen6	north_america	16	31	32.5	0.0874628412503394	0	0	0	0
LOC105199351	4	3BW	south_america	0	4	20.5	-2.32192809488736	0	0	0	0
LOC105199351	4	114CQH	south_america	3	7	20.5	-0.321928094887362	0	0	0	0
LOC105199351	14	28W	south_america	12	26	20.5	-0.206450877467426	0	0	0	0
LOC105199351	12	Queen4	north_america	14	26	20.5	0.206450877467426	0	0	0	0
LOC105199351	0	112BQA	south_america	0	0	20.5	0	0	0	0	0
LOC105199351	15	Queen5	north_america	11	26	20.5	-0.415037499278844	0	0	0	0
LOC105199351	6	112BQH	south_america	4	10	20.5	-0.485426827170242	0	0	0	0
LOC105199351	8	118QH	south_america	4	12	20.5	-0.84799690655495	0	0	0	0
LOC105199351	12	118QA	south_america	9	21	20.5	-0.37851162325373	0	0	0	0
LOC105199351	4	114CQT	south_america	4	8	20.5	0	0	0	0	0
LOC105199351	10	104W	south_america	10	20	20.5	0	0	0	0	0
LOC105199351	10	118QT	south_america	7	17	20.5	-0.459431618637297	0	0	0	0
LOC105199351	14	114CQA	south_america	14	28	20.5	0	0	0	0	0
LOC105199351	23	SBSb-virgin-queens-4	taiwan	29	52	20.5	0.321928094887362	0	0	0	0
LOC105199351	16	Queen1	north_america	17	33	20.5	0.082462160191973	0	0	0	0
LOC105199351	4	111BQH	south_america	2	6	20.5	-0.736965594166206	0	0	0	0
LOC105199351	8	114W	south_america	5	13	20.5	-0.584962500721156	0	0	0	0
LOC105199351	14	Queen6	north_america	13	27	20.5	-0.0995356735509144	0	0	0	0
LOC105199351	9	3QA	south_america	8	17	20.5	-0.15200309344505	0	0	0	0
LOC105199351	14	112BQT	south_america	12	26	20.5	-0.206450877467426	0	0	0	0
LOC105199351	28	111BQA	south_america	24	52	20.5	-0.214124805352848	0	0	0	0
LOC105199351	16	SBSb-virgin-queens-3	taiwan	19	35	20.5	0.234465253637023	0	0	0	0
LOC105199351	12	112W	south_america	9	21	20.5	-0.37851162325373	0	0	0	0
LOC105199351	17	111BQT	south_america	17	34	20.5	0	0	0	0	0
LOC105199351	16	Queen2	north_america	13	29	20.5	-0.280107919192735	0	0	0	0
LOC105199351	23	SBSb-virgin-queens-1	taiwan	19	42	20.5	-0.263034405833794	0	0	0	0
LOC105199351	25	SBSb-virgin-queens-2	taiwan	30	55	20.5	0.253756592245783	0	0	0	0
LOC105199351	2	43QH	south_america	2	4	20.5	0	0	0	0	0
LOC105199351	6	43QT	south_america	4	10	20.5	-0.485426827170242	0	0	0	0
LOC105199351	13	Queen3	north_america	14	27	20.5	0.0995356735509144	0	0	0	0
LOC105199351	10	43QA	south_america	10	20	20.5	0	0	0	0	0
LOC105199351	8	43CW	south_america	6	14	20.5	-0.362570079384708	0	0	0	0
LOC105199351	1	3QH	south_america	5	6	20.5	1.58496250072116	0	0	0	0
LOC105199351	3	3QT	south_america	4	7	20.5	0.321928094887362	0	0	0	0
LOC105199492	9	Queen2	north_america	11	20	18	0.263034405833794	0	0	0	0
LOC105199492	8	Queen5	north_america	10	18	18	0.289506617194985	0	0	0	0
LOC105199492	15	Queen1	north_america	11	26	18	-0.415037499278844	0	0	0	0
LOC105199492	14	Queen3	north_america	9	23	18	-0.584962500721156	0	0	0	0
LOC105199492	10	Queen4	north_america	10	20	18	0	0	0	0	0
LOC105199492	1	SBSb-virgin-queens-1	taiwan	2	3	18	0.584962500721156	0	0	0	0
LOC105199492	9	Queen6	north_america	9	18	18	0	0	0	0	0
LOC105199492	3	SBSb-virgin-queens-4	taiwan	2	5	18	-0.415037499278844	0	0	0	0
LOC105199492	1	SBSb-virgin-queens-2	taiwan	1	2	18	0	0	0	0	0
LOC105199492	6	SBSb-virgin-queens-3	taiwan	2	8	18	-1.22239242133645	0	0	0	0
LOC105199591	4	Queen3	north_america	6	10	11	0.485426827170242	1	0	0	1
LOC105199591	6	SBSb-virgin-queens-4	taiwan	6	12	11	0	1	0	0	1
LOC105199591	7	Queen5	north_america	7	14	11	0	1	0	0	1
LOC105199591	3	Queen2	north_america	5	8	11	0.584962500721156	1	0	0	1
LOC105199591	3	SBSb-virgin-queens-1	taiwan	3	6	11	0	1	0	0	1
LOC105199591	4	Queen4	north_america	4	8	11	0	1	0	0	1
LOC105199591	8	SBSb-virgin-queens-2	taiwan	7	15	11	-0.169925001442312	1	0	0	1
LOC105199591	4	Queen1	north_america	8	12	11	0.84799690655495	1	0	0	1
LOC105199591	5	Queen6	north_america	7	12	11	0.415037499278844	1	0	0	1
LOC105199591	4	SBSb-virgin-queens-3	taiwan	3	7	11	-0.321928094887362	1	0	0	1
LOC105199601	13	Queen1	north_america	19	32	34	0.514573172829758	0	0	0	0
LOC105199601	17	Queen5	north_america	8	25	34	-1	0	0	0	0
LOC105199601	30	SBSb-virgin-queens-4	taiwan	26	56	34	-0.199308808223407	0	0	0	0
LOC105199601	41	SBSb-virgin-queens-3	taiwan	38	79	34	-0.106915203916512	0	0	0	0
LOC105199601	17	Queen6	north_america	14	31	34	-0.263034405833794	0	0	0	0
LOC105199601	73	SBSb-virgin-queens-2	taiwan	56	129	34	-0.376563351464208	0	0	0	0
LOC105199601	20	Queen2	north_america	16	36	34	-0.304854581528421	0	0	0	0
LOC105199601	17	Queen4	north_america	15	32	34	-0.169925001442312	0	0	0	0
LOC105199601	19	Queen3	north_america	12	31	34	-0.62148837674627	0	0	0	0
LOC105199601	43	SBSb-virgin-queens-1	taiwan	32	75	34	-0.415037499278844	0	0	0	0
LOC105199708	20	SBSb-virgin-queens-2	taiwan	13	33	16.5	-0.584962500721156	0	0	0	0
LOC105199708	8	Queen6	north_america	9	17	16.5	0.15200309344505	0	0	0	0
LOC105199708	13	SBSb-virgin-queens-4	taiwan	17	30	16.5	0.362570079384708	0	0	0	0
LOC105199708	7	Queen2	north_america	9	16	16.5	0.321928094887362	0	0	0	0
LOC105199708	5	Queen4	north_america	7	12	16.5	0.415037499278844	0	0	0	0
LOC105199708	6	SBSb-virgin-queens-1	taiwan	9	15	16.5	0.514573172829758	0	0	0	0
LOC105199708	13	SBSb-virgin-queens-3	taiwan	14	27	16.5	0.0995356735509144	0	0	0	0
LOC105199708	9	Queen1	north_america	10	19	16.5	0.137503523749935	0	0	0	0
LOC105199708	5	Queen3	north_america	11	16	16.5	1	0	0	0	0
LOC105199708	5	Queen5	north_america	8	13	16.5	0.584962500721156	0	0	0	0
LOC105199719	3	43CW	south_america	1	4	7	-1	0	0	0	0
LOC105199719	4	3QT	south_america	1	5	7	-1.32192809488736	0	0	0	0
LOC105199719	2	3QH	south_america	2	4	7	0	0	0	0	0
LOC105199719	0	3QA	south_america	4	4	7	2.32192809488736	0	0	0	0
LOC105199719	155	SBSb-virgin-queens-2	taiwan	208	363	7	0.421956913218634	0	0	0	0
LOC105199719	2	112BQH	south_america	0	2	7	-1.58496250072116	0	0	0	0
LOC105199719	66	112BQA	south_america	86	152	7	0.376854305390956	0	0	0	0
LOC105199719	4	28W	south_america	3	7	7	-0.321928094887362	0	0	0	0
LOC105199719	5	111BQT	south_america	4	9	7	-0.263034405833794	0	0	0	0
LOC105199719	0	3BW	south_america	0	0	7	0	0	0	0	0
LOC105199719	193	SBSb-virgin-queens-4	taiwan	195	388	7	0.0147970019280805	0	0	0	0
LOC105199719	48	Queen1	north_america	35	83	7	-0.444784842672896	0	0	0	0
LOC105199719	1	43QH	south_america	0	1	7	-1	0	0	0	0
LOC105199719	146	SBSb-virgin-queens-3	taiwan	160	306	7	0.131244533278253	0	0	0	0
LOC105199719	0	118QH	south_america	1	1	7	1	0	0	0	0
LOC105199719	28	Queen5	north_america	39	67	7	0.46394709975979	0	0	0	0
LOC105199719	1	118QT	south_america	6	7	7	1.8073549220576	0	0	0	0
LOC105199719	146	SBSb-virgin-queens-1	taiwan	140	286	7	-0.0601209924375709	0	0	0	0
LOC105199719	5	43QA	south_america	1	6	7	-1.58496250072116	0	0	0	0
LOC105199719	4	118QA	south_america	3	7	7	-0.321928094887362	0	0	0	0
LOC105199719	42	Queen3	north_america	41	83	7	-0.0339473319233377	0	0	0	0
LOC105199719	1	111BQH	south_america	0	1	7	-1	0	0	0	0
LOC105199719	34	Queen4	north_america	40	74	7	0.228268987673117	0	0	0	0
LOC105199719	0	114CQH	south_america	0	0	7	0	0	0	0	0
LOC105199719	6	104W	south_america	1	7	7	-1.8073549220576	0	0	0	0
LOC105199719	2	114CQT	south_america	3	5	7	0.415037499278844	0	0	0	0
LOC105199719	1	43QT	south_america	0	1	7	-1	0	0	0	0
LOC105199719	2	112W	south_america	1	3	7	-0.584962500721156	0	0	0	0
LOC105199719	62	111BQA	south_america	74	136	7	0.251538766995964	0	0	0	0
LOC105199719	3	114CQA	south_america	2	5	7	-0.415037499278844	0	0	0	0
LOC105199719	20	Queen6	north_america	41	61	7	1	0	0	0	0
LOC105199719	2	114W	south_america	0	2	7	-1.58496250072116	0	0	0	0
LOC105199719	2	112BQT	south_america	5	7	7	1	0	0	0	0
LOC105199719	39	Queen2	north_america	45	84	7	0.20163386116965	0	0	0	0
LOC105199746	3	Queen4	north_america	5	8	7	0.584962500721156	0	0	0	0
LOC105199746	4	Queen3	north_america	2	6	7	-0.736965594166206	0	0	0	0
LOC105199746	1	Queen5	north_america	1	2	7	0	0	0	0	0
LOC105199746	0	Queen2	north_america	2	2	7	1.58496250072116	0	0	0	0
LOC105199746	12	SBSb-virgin-queens-1	taiwan	3	15	7	-1.70043971814109	0	0	0	0
LOC105199746	2	Queen6	north_america	1	3	7	-0.584962500721156	0	0	0	0
LOC105199746	10	SBSb-virgin-queens-3	taiwan	8	18	7	-0.289506617194985	0	0	0	0
LOC105199746	1	Queen1	north_america	0	1	7	-1	0	0	0	0
LOC105199746	8	SBSb-virgin-queens-4	taiwan	10	18	7	0.289506617194985	0	0	0	0
LOC105199746	6	SBSb-virgin-queens-2	taiwan	12	18	7	0.893084796083488	0	0	0	0
LOC105199756	37	114CQT	south_america	54	91	7	0.533432200081074	0	0	0	0
[truncated: 929 more rows]
