# Supplementary material for: Genomic architecture and evolutionary antagonism drive allelic expression bias in the social supergene of red fire ants
Source: eLife journal article supplement (doi:10.7554/elife.55862), 2020-08-10
Supplement: supp [file elife-55862-supp-v1.zip › elife_poa_e55862_Figure_4_source_data_1.csv]

gene_id	lfcs_allele_bias	padj_allele_bias	lfcs_social_bias	padj_social_bias
LOC105193112	-0.140062024617045	0.999525128080171	0.645175515071867	0.611499110834923
LOC105193113	-0.133539485600369	0.999525128080171	0.280559574560427	0.867411514456139
LOC105193114	-0.127702364009421	0.999525128080171	-1.06516459376733	0.52545094347847
LOC105193116	0.156415796452232	0.999525128080171	-0.039097523556512	0.986454098504249
LOC105193117	-0.125820173839786	0.999525128080171	-0.219960623694107	0.924089898213702
LOC105193118	0.0648162019876965	0.999525128080171	-0.185570612805207	0.927231466011535
LOC105193119	0.601547393532511	0.62910477516952	-1.77084343905423	0.165219209919468
LOC105193120	0.707936073038544	0.514125518500256	-0.988917108542322	0.523031106927917
LOC105193121	0.287167956518198	0.999525128080171	0.368949793352081	0.891318656484946
LOC105193122	-0.231161664288955	0.999525128080171	0.593116374581083	0.729383745111232
LOC105193123	0.394263743822944	0.98939172536629	0.118741245033087	0.977094595826083
LOC105193124	-0.00393132620770926	1	0.0273652811356341	0.990197446095228
LOC105193129	-0.534814629354155	0.786476116585806	1.37959573022016	0.31239668479277
LOC105193130	2.37238135049061	0.0105927105434066	0.905300545810567	0.623002925301025
LOC105193131	0.271191120451582	0.887512728640875	-0.820206909314706	0.72756738708661
LOC105193132	-0.652301206367408	0.317135889086985	-1.16471906801621	0.468681481379826
LOC105193134	1.30003904183017	0.000342410737069825	0.224416483778446	0.909952540899128
LOC105193135	-0.996191039387853	0.0910938089212996	1.32815824428576	0.151796893762747
LOC105193137	1.00310973369096	0.392264059911057	-1.10971093981109	0.223025722946878
LOC105193138	2.43620151042476	0.00646078061067305	-0.329803557508224	0.89897043069035
LOC105193145	-0.0255274159418616	1	0.927665769149688	0.450446398369713
LOC105193214	-0.0650951268739468	0.999525128080171	-0.766286562722564	0.549656403618963
LOC105193215	0.0181961174443971	1	-1.01867365061694	0.539891157096737
LOC105193217	0.174517000417527	0.999525128080171	1.12620235403205	0.407994759949563
LOC105193218	-0.0700367285321902	0.999525128080171	0.75192902123833	0.679808186435026
LOC105193219	-0.407732941416889	0.550885335913998	0.455480077862122	0.731160045915749
LOC105193220	-0.164688636787262	0.95462264495942	1.3670555128144	0.142406746745207
LOC105193222	0.0543563131121353	1	0.766046539646522	0.599962168975491
LOC105193223	-0.172913098370385	0.999525128080171	0.15735861140838	0.93717309707897
LOC105193224	0.0322624543354867	1	-0.33154898852024	0.892239786900744
LOC105193227	0.38628477813717	0.999525128080171	0.33164765860912	0.911371804632779
LOC105193228	0.401409776523846	0.83528451218073	0.21883989379391	0.940651390074404
LOC105193229	-0.101495021733027	0.999525128080171	-0.123964816423125	0.956661303356479
LOC105193230	-0.178490989329807	0.999525128080171	-0.0782670904410308	0.975919150659294
LOC105193231	0.328713834033342	0.843787949313811	-0.370991975872813	0.87707280375616
LOC105193804	-0.029996414238102	1	0.532857166376757	0.765611441917726
LOC105193807	-0.0802505384015912	0.999525128080171	-1.29400757680359	0.275394791060891
LOC105193808	0.167849740510819	0.999525128080171	0.0795467848070692	0.97314586296743
LOC105193812	0.591820871445634	0.550885335913998	-0.58092292014165	0.682957866939664
LOC105193814	-0.188416171477807	0.999525128080171	0.654883600919388	0.804050730833022
LOC105193815	0.224405290806918	0.95462264495942	-0.463151240408966	0.738485770208977
LOC105193816	0.18772379563353	0.999525128080171	0.55430410667934	0.744000122030106
LOC105193817	-0.0996456386721579	1	0.523103304827388	0.695147132608302
LOC105193818	0.183571403154866	0.999525128080171	-0.0677741522168051	0.980346702502246
LOC105193819	0.0125958520830409	1	0.596209546264633	0.639616886445894
LOC105193820	-0.00556980142541111	1	-0.481780107957089	0.820130913463671
LOC105193821	0.122244140005097	0.999525128080171	-0.700457960257038	0.597301725225081
LOC105193822	1.33899844340901	0.19562640465289	0.158313738213185	0.969222690426201
LOC105193823	-0.183571403308089	0.999525128080171	-0.616512463973163	0.716698960496377
LOC105193824	-0.726569402496475	0.498169149103094	-1.13868159558873	0.237441824920117
LOC105193825	-1.86963653534279	7.4338373180917e-06	1.91463594672903	0.0247791828751858
LOC105193826	0.134088061017949	0.999525128080171	-0.0451151952096248	0.984397808120103
LOC105193827	0.301528525953533	0.906273462816231	-0.602610564711775	0.651182294767976
LOC105193828	0.103668750436015	0.999525128080171	0.263190068244333	0.909782176733253
LOC105193829	0.265218609026964	0.906273462816231	-0.745148194689884	0.605343671601676
LOC105193830	0.181578269745837	0.999525128080171	0.112478572697557	0.958048775286195
LOC105193831	0.907772059847944	0.00278914773785684	-1.30816584017162	0.101619452679496
LOC105193832	-0.689320928800615	0.447866800447189	-0.0812762917233501	0.974526108689936
LOC105193833	0.136597830957898	0.999525128080171	-0.35888257018301	0.841422717770746
LOC105193834	-0.0815135974721342	0.999525128080171	-0.570039276625368	0.752796479402047
LOC105193835	0.203823821534961	0.999525128080171	-0.326266995247051	0.853314361491847
LOC105193837	0.432667188088003	0.458346989726127	-1.04299796018141	0.407182666940272
LOC105193839	-0.248467741549171	0.999525128080171	0.51732073731334	0.699559734963862
LOC105193871	0.16863552562894	0.999525128080171	-0.239871331744436	0.902446339619005
LOC105193872	-0.903991401346753	0.639540460958772	1.53720097091566	0.356213803988387
LOC105194381	-0.404944806466829	0.592763437091149	-0.239141081357399	0.90492454478758
LOC105194416	-0.155481315970905	0.999525128080171	-0.380445271802397	0.838514148460667
LOC105194425	1.71778006928577	0.0952248245761796	0.706140796510007	0.594189275737747
LOC105194434	-2.47538655907098	2.01534413643862e-12	0.0865374207153619	0.977094595826083
LOC105194441	-1.43252435158175	0.0780450767724457	0.533202943858884	0.718672003259251
LOC105194453	-0.0186327733063386	1	-0.0481006771986909	0.98314146732363
LOC105194461	-0.0980982510375471	0.999525128080171	0.00189568989702987	0.999383575054441
LOC105194481	-0.756431636477525	7.19673817174024e-05	2.75648307634191	0.00313602014319255
LOC105194487	0.318284268500764	0.999525128080171	4.77131510001403	7.23265170936049e-08
LOC105194495	-1.10753483693886	0.0990097644467557	2.34433201616215	0.118483530181945
LOC105194510	0.38628477813717	0.999525128080171	-0.454121433407957	0.848974012573448
LOC105194522	0.075140734881159	1	-0.170247826084227	0.923792545618664
LOC105194585	0.0594642909556513	0.999525128080171	-0.0588625088491508	0.980388566105953
LOC105194616	-0.201737122154033	0.999525128080171	0.674603386811437	0.645927946570492
LOC105194663	-0.372960156364288	0.598049756134545	0.195486409518841	0.929591875890222
LOC105194672	-0.122235789146987	0.999525128080171	-0.0982336244742659	0.958506116315055
LOC105194675	0.110145804410174	0.999525128080171	-0.584411584358839	0.676247543221645
LOC105194680	-0.111560327672989	0.999525128080171	-0.045314766723086	0.987552583282894
LOC105194690	0.709264614323207	0.358054361991615	-2.21887852240981	0.0605925570550366
LOC105194738	-0.13486610351943	0.999525128080171	-0.0516667420547217	0.986236471758205
LOC105194763	-0.0622219314733502	1	-0.0523319346057583	0.98314146732363
LOC105194795	-0.319991625034698	0.999525128080171	0.680356257312373	0.708104121388969
LOC105194811	2.8083084660426	8.10151623427105e-16	-1.14133606398689	0.200540261491981
LOC105194836	0.521146756216256	0.565671974661845	-0.452299277014764	0.829628939824789
LOC105194887	0.0179138680255686	1	-0.658993467805142	0.763565878390614
LOC105195673	-1.20128493893059e-16	1	-0.0126133351084265	0.997277375795561
LOC105195681	0.215245128259718	0.999525128080171	0.363655145724657	0.845816624986835
LOC105195701	0.0827070867178171	0.999525128080171	-0.467101570805277	0.804982812239019
LOC105195710	-0.38628477900444	0.999525128080171	-0.255269621957437	0.91592455832321
LOC105195720	-0.421419289046286	0.392264059911057	-0.59366940090824	0.707092952937824
LOC105195733	-0.783289128506864	0.598049756134545	0.582302855719362	0.827573203583285
LOC105195750	0.33294071091407	0.990661736203897	0.381725435768223	0.795823108083619
LOC105195766	0.0465946115817321	1	-0.396974490823957	0.866967200166076
LOC105195772	-0.253873953124187	0.999525128080171	1.04590596786825	0.597583458624173
LOC105195781	-0.858790852832065	0.498169149103094	-0.768972734487929	0.565008196936877
LOC105195789	-0.135523016532225	0.999525128080171	-0.501171224627508	0.714750386644433
LOC105195797	-0.0185529531344596	1	-0.627591575308309	0.746877099161798
LOC105196903	-0.207665401119967	0.999525128080171	-1.26122396491643	0.48301600827385
LOC105196904	-0.260434519318572	0.999525128080171	-1.0973812358717	0.484829195694033
LOC105196907	0.235950040246767	0.999525128080171	-0.235562880220016	0.897793214791654
LOC105196909	-0.076803074352182	0.999525128080171	-0.458390549844958	0.794352804451693
LOC105196910	0.250205502062019	0.999525128080171	-0.297714726574547	0.904578758803246
LOC105199287	-0.595367024549171	0.329475447975889	2.75062195787601	0.000819256022040042
LOC105199288	-0.995191205905539	0.555053379819783	2.45000585894627	0.00168989988235564
LOC105199289	-0.931112013160673	0.428700435027169	0.209321239881705	0.924113808632139
LOC105199290	-0.906112599673332	0.358054361991615	-0.131069827146786	0.953620572558974
LOC105199292	-0.00572437855625753	1	-0.305839767395283	0.876016380008049
LOC105199293	-0.565398956055906	0.428700435027169	0.315563174198511	0.84779721752174
LOC105199295	-0.884104934360785	0.00278914773785684	0.190188317319639	0.927231466011535
LOC105199296	0.389463470735774	0.887512728640875	0.156645668730211	0.930814531101965
LOC105199297	-0.273770640247282	0.999525128080171	0.772082430541165	0.540178357118404
LOC105199298	-0.35494153882674	0.999525128080171	-0.194270835262148	0.952347243913677
LOC105199299	-0.370319058922246	0.917475024590087	-0.772353561704006	0.648243592889607
LOC105199300	0.148743457946903	0.999525128080171	-0.157341432632548	0.935891556915301
LOC105199302	0.219539520453731	0.999525128080171	0.777266208905455	0.532896203099949
LOC105199303	0.111240182782013	0.999525128080171	-0.586823946131458	0.696378769161624
LOC105199304	0.309821491689056	0.916243522724381	-0.064544315654553	0.977740158165724
LOC105199305	0.472777026457962	0.906273462816231	-1.29467670304996	0.4559416415332
LOC105199307	0.407560214314482	0.906273462816231	-0.128586553150593	0.950325098733139
LOC105199309	0.226736047771854	0.999525128080171	0.161376853448274	0.933636674455533
LOC105199310	-0.60644226964419	0.555053379819783	0.698394902618525	0.610983932146988
LOC105199311	-0.265184415595809	0.916243522724381	0.159532381445776	0.934750527523818
LOC105199313	0.215724647465028	0.974994582783491	0.355728704632699	0.879194832845232
LOC105199314	0.184629406571361	0.999525128080171	0.109143971197988	0.955725309350086
LOC105199315	-2.57695495803167	0.00451818518298678	3.97253225176401	2.55110254368485e-05
LOC105199316	-1.14466190337512	0.0329106381154238	1.43982220958249	0.23284440547506
LOC105199317	-0.327055297188383	0.999525128080171	0.599404697724917	0.763565878390614
LOC105199318	0.379366004407642	0.698835579640793	-0.569313270365324	0.696625991841698
LOC105199319	0.0558895572356934	1	3.88471941129598	2.13573106462794e-09
LOC105199320	-0.514466568160666	0.825276861724964	-0.922045191316385	0.561560660486127
LOC105199321	1.7071480483859	0.0972038146772008	-0.394809305210702	0.8740703694261
LOC105199322	0.89327905878895	0.598049756134545	-0.0453909705923743	0.987552583282894
LOC105199323	-0.898436160358632	0.555053379819783	2.07039292131537	0.0111296934495546
LOC105199326	0.298441513393625	0.999525128080171	2.92414972934119	0.00118025188700675
LOC105199327	-1.51595947731244	0.00277055098301883	2.80144843012128	0.00104192462503671
LOC105199328	0.22361030939664	0.999525128080171	1.87211704730286	0.176333324264367
LOC105199329	-0.43920693754522	0.550885335913998	-1.08133242571785	0.412512736489283
LOC105199332	1.73172132158594	2.00711956573128e-07	-0.82290590359181	0.579346681960038
LOC105199335	-1.42800992885344	0.300429399968003	1.1126023825001	0.244656330178836
LOC105199336	-0.0734601198348372	0.999525128080171	-0.0631594144808009	0.977755960014993
LOC105199337	0.105534845330907	0.999525128080171	-0.501960403244062	0.735517737326942
LOC105199338	0.402563813585388	0.906273462816231	-0.48911825952802	0.729383745111232
LOC105199340	0.246393037452913	0.96635667811393	-0.440141671394744	0.789806591949763
LOC105199341	-0.242986158661332	0.999525128080171	0.407254402088877	0.843468358632942
LOC105199342	0.513162587445895	0.447866800447189	-0.826251000059323	0.473645848833408
LOC105199343	0.25963653924364	0.924866510203365	-0.186784375615261	0.927827696331547
LOC105199345	0.794646193724123	0.12661537926477	-0.428015198712212	0.766803315450386
LOC105199346	0.327055296560985	0.999525128080171	-1.05042304941557	0.564206139099589
LOC105199349	-0.127315367973562	0.999525128080171	-0.0370776331207735	0.990197446095228
LOC105199351	-0.0675358105664064	0.999525128080171	-0.118853086013129	0.955885225049097
LOC105199354	-0.12990861557127	0.999525128080171	2.66195502798574	0.00357413491978462
LOC105199355	1.17074372430443	0.394086596612673	0.336674513487715	0.911371804632779
LOC105199356	0.99128320880613	0.514125518500256	-1.44729833119657	0.208425599102015
LOC105199484	0.0366902205649674	1	0.0745109668433775	0.980614046879547
LOC105199492	-0.0956798158753621	0.999525128080171	-1.14709577854854	0.429022178862497
LOC105199531	1.34293418884502	0.000297254772919625	2.08182458120361	0.0253768274320305
LOC105199549	-0.412890061307315	0.999525128080171	0.626025042019815	0.763565878390614
LOC105199559	1.13109943500925	0.462916622123949	-0.96952078627746	0.676258551822805
LOC105199565	0.461374271958269	0.598049756134545	-0.792599012799052	0.68043870756896
LOC105199580	-0.386284779004439	0.999525128080171	-0.412743760789112	0.847795366338582
LOC105199591	0.416075437633693	0.852203123155117	-0.891117764463135	0.473890415712326
LOC105199601	-0.294913304393481	0.825276861724964	0.0574574236011082	0.985633848555084
LOC105199617	-0.675356901379452	0.623008444074829	0.34779694282848	0.874668573832444
LOC105199655	0.28237580705515	0.999525128080171	-0.0734610120764518	0.982074077846269
LOC105199708	0.445391226411712	0.666410393293857	-0.876625036447821	0.558068747885413
LOC105199719	0.214492721807763	0.852203123155117	-0.577619298112097	0.637267071822008
LOC105199727	-1.2382911836058	0.358054361991615	-0.387132479901334	0.890569410430564
LOC105199746	-0.0196226411474256	1	0.259256291199658	0.897793214791654
LOC105199756	3.03349009677643	6.00529349261436e-05	0.549634381260104	0.751882600879969
LOC105199767	0.466622310763473	0.772937834024184	0.0386684345967595	0.986422278348738
LOC105199780	0.27403207935297	0.999525128080171	-0.299474473015003	0.889402334286645
LOC105199786	-0.638487510598957	0.822177652833445	-0.758025025523675	0.711507832037006
LOC105199789	-1.26974848562704	0.19562640465289	2.12777393671991	0.0330951720744365
LOC105199797	-0.162231067590207	0.999525128080171	-0.686250458632811	0.573094731849975
LOC105199803	0.204924400815189	0.999525128080171	1.87244245942055	0.172568844483047
LOC105199810	0.384877836737299	0.999525128080171	0.769208968403134	0.763565878390614
LOC105199816	0.030209729890682	1	-0.035642672650529	0.99323339775794
LOC105199893	0.722124188012028	0.800140516158651	0.879395988432318	0.719583287981748
LOC105199901	0.544206522202768	0.358054361991615	1.48188949549007	0.0681875212466281
LOC105201520	0.22093678651291	0.999525128080171	-0.47893007045713	0.756132869255214
LOC105201521	0.62595554728895	0.550885335913998	2.62381021863909	0.00205104959640817
LOC105201523	-0.259985813103765	0.999525128080171	-0.671403476216848	0.642782907528966
LOC105201526	0.553369231512048	0.944099537599274	1.5793612069651	0.396816632485725
LOC105201527	-0.121943494368208	0.999525128080171	-0.450198110493952	0.772367566468872
LOC105201528	-0.235923203360045	0.999525128080171	-1.46074630221742	0.226757323786175
LOC105201529	0.0113151596465371	1	-1.22607633690719	0.378564595800443
LOC105201533	-0.252334536435418	0.900262226372909	-0.601794099560083	0.652691789198096
LOC105201534	-0.0426131003829316	1	0.270782275810739	0.866967200166076
LOC105201536	1.32825409022579	0.317135889086985	-1.79372135713992	0.00526491860258878
LOC105201541	3.40364142405975e-16	1	-0.949589719001056	0.367421573198544
LOC105202812	4.53677557465102	2.01534413643862e-12	-0.997262280408932	0.43563678049948
LOC105202813	-0.359604694211801	0.852203123155117	-0.318445779461118	0.870962070490831
LOC105202814	-8.00856625953729e-17	1	1.27725356707602	0.367421573198544
LOC105202816	2.88930826907447	0.000650516661993638	-2.2409957411274	0.00497080501593069
LOC105202817	1.55819977096599	0.218836164049564	0.110081850939948	0.9765028348777
LOC105202818	0.102315701451464	0.999525128080171	1.21078865423315	0.215281384724331
LOC105202820	1.3219710881645	0.132083536513897	3.53389449102868	2.37994427685105e-07
LOC105202821	-1.63848933432464	0.193285321013568	1.02892513265026	0.511757298072923
LOC105202822	0.167849740510819	0.999525128080171	1.32405913271656	0.142406746745207
LOC105202823	2.93891934541155	0.000202075842951857	1.76236102733302	0.230438646490652
LOC105202826	-0.838436017390364	0.451148039244562	0.806860075636746	0.559278942046052
LOC105202831	-0.200118001937377	0.999525128080171	0.641463277208022	0.820130913463671
LOC105202834	-0.327623510682087	0.999525128080171	2.77699631840359	0.00057461447800104
LOC105203016	0.376352433533094	0.95462264495942	-0.0928592089762906	0.965704227664303
LOC105203017	-0.121463900792678	0.999525128080171	-0.40188526425235	0.831656010392832
LOC105203018	-0.566102389288342	0.584943334645171	-1.23222395964188	0.339450743089546
LOC105203020	-0.136831554688096	0.999525128080171	-0.356997253920507	0.814389743648526
LOC105203021	-0.127982236592899	0.999525128080171	-0.195289826313062	0.921089030496903
LOC105203023	-0.256260662949945	0.999525128080171	0.378435768279654	0.849201716022169
LOC105203024	3.30353358205913e-16	1	-0.881670169744565	0.508983171034812
LOC105203026	-0.157055868399844	0.999525128080171	-0.645089340097337	0.788978009357292
LOC105203027	-0.305002190536581	0.718544939710569	0.0328642414533959	0.987915468924702
LOC105203028	-0.136625728678793	0.999525128080171	-0.782470298851341	0.575408727278621
LOC105203029	-1.21638324753605	0.397836494391834	1.26812284848264	0.406938651725947
LOC105203031	-0.166523463932436	0.999525128080171	-0.459186268902075	0.754609502309147
LOC105203032	-0.412952216981468	0.550885335913998	0.346704178173241	0.873025957906251
LOC105203033	0.256112326407534	0.947223866981317	-0.262729334832306	0.893314576582057
LOC105203034	0.376905272359485	0.276643811237307	-0.134301228097326	0.943420486931557
LOC105203035	0.0777995943730121	1	0.207698050121614	0.919518973169231
LOC105203036	-0.184254383405031	0.999525128080171	0.0394050443294279	0.986236471758205
LOC105203037	0.0824735380798551	0.999525128080171	0.685539172269896	0.572104941173447
LOC105203038	0.0278737758940509	1	-0.145426837950613	0.935891556915301
LOC105203039	-0.0295560000678925	1	0.234210920859715	0.89897043069035
LOC105203040	0.417389623184541	0.743935046853798	-0.578054522242267	0.735831591080785
LOC105203041	-0.38958459400981	0.999525128080171	0.949985913413792	0.344800860314171
LOC105203044	-0.0220587909717601	1	-1.04247083533739	0.471036027323721
LOC105203046	0.293204963743428	0.999525128080171	-0.888101199589048	0.4544409657228
LOC105203048	0.0267371818543643	1	-0.121262796146125	0.950733603016507
LOC105203049	-0.298559488843433	0.852203123155117	0.612737242680528	0.762506630912362
LOC105203050	-0.0593471156479739	0.999525128080171	-0.309331053277114	0.861209486238617
LOC105203051	-0.228704417903512	0.999525128080171	-0.25662828223861	0.890569410430564
LOC105203052	-0.088709448674958	0.999525128080171	-0.233772658025054	0.885933631675351
LOC105203053	-0.0279822726193918	1	0.0176541133025784	0.994991140115734
LOC105203055	0.140174609437022	0.999525128080171	-0.272668045058672	0.921951827917056
LOC105203056	0.161349161348246	0.999525128080171	-0.0623234588643002	0.981132449426041
LOC105203057	0.209792969588185	0.999525128080171	-0.228270670365635	0.892946535186333
LOC105203059	0.653290222797641	0.822177652833445	1.76341626883182	0.0249524729552803
LOC105203060	0.0082049862375822	1	0.618659653576117	0.671313421276204
LOC105203061	0.390158575730095	0.666410393293857	-0.781638346330975	0.546097650634688
LOC105203063	0.172096234454805	0.999525128080171	1.32871462247985	0.307822091842377
LOC105203064	-0.00749701922615966	1	1.22844732692707	0.400209903882852
LOC105203065	1.97829172125861	1.38560838970146e-06	-1.3381135349532	0.233452249326699
LOC105203067	-0.176093114419736	0.999525128080171	0.873683785746176	0.471024679283398
LOC105203068	-0.0380529008375143	1	0.352522492038306	0.915192733597721
LOC105203069	0	1	-0.0800611961226111	0.971568983242552
LOC105203071	-0.249938943974539	0.999525128080171	1.15811456004194	0.244656330178836
LOC105203072	0.22368414620043	0.909169203588355	-0.13591298889118	0.948564749719898
LOC105203073	-0.386284779004439	0.999525128080171	0.115854003550218	0.96183363151299
LOC105203074	-0.475651710299049	0.19562640465289	-0.410978149288622	0.80733601034295
LOC105203076	0.860054809945384	0.524857800666501	0.155015940538962	0.946314431651315
LOC105203077	0.751337727194016	0.3138801557264	0.654185203126293	0.732424214538837
LOC105203079	0.528226596711827	0.96635667811393	0.824105126498092	0.654344517838323
LOC105203080	0.0999615492119276	0.999525128080171	1.20002074999519	0.324455664121021
LOC105203081	0.194259952371239	0.999525128080171	0.262282268778391	0.886098168631336
LOC105203082	0.416896925893264	0.52572733836538	0.463253111697427	0.742811729169649
LOC105203085	-5.15551452957713e-15	1	-1.84274454690674	0.269642636983497
LOC105203086	-2.94456783541891	4.09151604441497e-13	2.52718549877564	0.000194099593291416
LOC105203090	0.722107453021075	0.514125518500256	0.494875069599936	0.738485770208977
LOC105203091	0.591674987882147	0.0261223740418059	-1.77218685847999	0.030174668662264
LOC105203092	-0.0339655603555989	1	-1.38521402844387	0.307610467949208
LOC105203095	0.0270568281489208	1	0.0821666985421617	0.976198259398036
LOC105203096	0.716657249676567	0.561012248288554	0.415258192414433	0.793824228314729
LOC105203097	-0.32533932955152	0.630565280110441	-0.327147631202587	0.86834232443496
LOC105204968	-0.315535367806701	0.999525128080171	0.392950541673796	0.899073354480472
LOC105204969	1.76935372502314	0.00872660793488039	0.0800561851010734	0.977755960014993
LOC105206526	0.215632323458203	0.999525128080171	1.32776174040712	0.404136296572168
LOC105206540	0.363554816858012	0.674310038100839	-0.115089649357148	0.950733603016507
LOC105206549	0.125617735741437	0.999525128080171	-0.405908324017088	0.850505412574299
LOC105206559	-0.256960754185838	0.999525128080171	-0.0690878479596101	0.98300066460129
LOC105206574	0.670494218543708	0.274120098597941	-1.11899758246507	0.437645131769138
LOC105206598	-0.0656217480465154	1	-0.688640145783325	0.699559734963862
LOC105206612	1.17469264322688	0.281814959547931	-1.14957454290126	0.339621796166987
LOC105206620	-0.155450687657773	0.95462264495942	-0.222656094555459	0.893232476403194
LOC105206630	-1.07719430943523	0.462916622123949	0.195148243580165	0.921951827917056
LOC105206635	0.274756074266934	0.924866510203365	-1.94742261280549	0.0091725211530111
LOC105206689	-0.0920642971643311	0.999525128080171	-0.392117763971688	0.808724037665038
LOC105206711	0.211033900175806	0.999525128080171	0.761696831172853	0.543989572963423
LOC105207370	0.48177062102802	0.916243522724381	-0.577220452140321	0.722572325189715
LOC105207387	-0.238328159630458	0.999525128080171	-0.326040094463695	0.870393548404808
LOC105207396	-0.115053748420182	0.999525128080171	-0.824264488104167	0.510763826087367
LOC105207402	0.165941799878996	0.916243522724381	-0.688557151591711	0.575868233284509
LOC105207412	-0.60425989716533	0.394742596563336	0.0497305509960386	0.983422506571451
LOC105207423	-0.610735344870717	0.916243522724381	0.973360369309841	0.689555411420506
LOC105207434	0.183388141771546	0.999525128080171	0.561418777390777	0.742012830342437
LOC105207450	0.0499331011704868	0.999525128080171	3.26647842241543	6.93521681131548e-05
LOC105207460	0.0603010658793849	1	0.187227967593515	0.925083443155252
LOC105207466	1.36389903125938	0.346317001682823	-0.174487775640903	0.933723438064286
LOC105207481	-0.0783435124669685	0.999525128080171	1.630100723617	0.0529725470476724
LOC105207492	1.18548541021762	0.0261223740418059	-1.24605010165877	0.156218508874451
