# Supplementary material for: Genomic architecture and evolutionary antagonism drive allelic expression bias in the social supergene of red fire ants
Source: eLife journal article supplement (doi:10.7554/elife.55862), 2020-08-10
Supplement: supp [file elife-55862-supp-v1.zip › elife_poa_e55862_Supplementary_file_1.xlsx]

## Sheet: Sheet1
Scaffold	Position in scaffold	Reference allele	Alternative allele	Position in gene	Gene(s) affected	SNP effect
NW_011803911.1	150360	C	T	downstream gene variant	LOC105204974	MODIFIER
NW_011803911.1	150385	T	G	downstream gene variant	LOC105204974	MODIFIER
NW_011803911.1	172497	G	A	intron variant	LOC105204974	MODIFIER
NW_011803911.1	233223	C	T	intron variant	LOC105204975	MODIFIER
NW_011803911.1	286162	C	T	intron variant	LOC105204975	MODIFIER
NW_011803911.1	290724	G	A	intron variant	LOC105204975	MODIFIER
NW_011803911.1	300686	C	T	intron variant	LOC105204975	MODIFIER
NW_011803911.1	352332	G	A	intron variant	LOC105204975	MODIFIER
NW_011803911.1	353967	C	T	intron variant	LOC105204975	MODIFIER
NW_011803911.1	355472	C	T	intron variant	LOC105204975	MODIFIER
NW_011803911.1	355508	G	A	intron variant	LOC105204975	MODIFIER
NW_011803911.1	356555	T	C	intron variant	LOC105204975	MODIFIER
NW_011803911.1	356796	C	T	intron variant	LOC105204975	MODIFIER
NW_011803911.1	358117	G	A	intron variant	LOC105204975	MODIFIER
NW_011803911.1	367678	C	T	upstream gene variant	LOC105204968	MODIFIER
NW_011803911.1	369983	T	C	missense variant	LOC105204968	MODERATE
NW_011803911.1	371001	C	T	intron variant	LOC105204975	MODIFIER
NW_011803911.1	371604	A	G	intron variant	LOC105204975	MODIFIER
NW_011803911.1	382501	T	C	intron variant	LOC105204975	MODIFIER
NW_011803911.1	382506	G	A	intron variant	LOC105204975	MODIFIER
NW_011803911.1	383227	A	G	intron variant	LOC105204975	MODIFIER
NW_011803911.1	406534	T	C	intron variant	LOC105204975	MODIFIER
NW_011803911.1	406626	C	T	intron variant	LOC105204975	MODIFIER
NW_011803911.1	421722	G	A	intron variant	LOC105204975	MODIFIER
NW_011803911.1	423310	T	C	intron variant	LOC105204975	MODIFIER
NW_011803911.1	428226	T	A	intron variant	LOC105204975	MODIFIER
NW_011803911.1	428483	T	C	intron variant	LOC105204975	MODIFIER
NW_011803911.1	428960	T	C	intron variant	LOC105204975	MODIFIER
NW_011803911.1	444348	G	A	intron variant	LOC105204975	MODIFIER
NW_011803911.1	445888	C	T	intron variant	LOC105204975	MODIFIER
NW_011803911.1	446093	C	T	intron variant	LOC105204975	MODIFIER
NW_011803911.1	447030	A	G	intron variant	LOC105204975	MODIFIER
NW_011803911.1	447092	A	C	intron variant	LOC105204975	MODIFIER
NW_011803911.1	455794	A	G	intron variant	LOC105204975	MODIFIER
NW_011803911.1	455806	T	C	intron variant	LOC105204975	MODIFIER
NW_011803911.1	456143	A	C	intron variant	LOC105204975	MODIFIER
NW_011803911.1	467116	C	T	intron variant	LOC105204975	MODIFIER
NW_011803911.1	467262	C	T	intron variant	LOC105204975	MODIFIER
NW_011803911.1	472874	C	T	intron variant	LOC105204975	MODIFIER
NW_011803911.1	481597	G	T	intron variant	LOC105204975	MODIFIER
NW_011803911.1	496394	A	G	intron variant	LOC105204975	MODIFIER
NW_011803911.1	501595	A	G	intron variant	LOC105204975	MODIFIER
NW_011803911.1	507299	T	C	intron variant	LOC105204975	MODIFIER
NW_011803911.1	507640	G	C	intron variant	LOC105204975	MODIFIER
NW_011803911.1	514589	G	A	intron variant	LOC105204975	MODIFIER
NW_011803911.1	514853	A	C	intron variant	LOC105204975	MODIFIER
NW_011803911.1	519874	G	A	intron variant	LOC105204975	MODIFIER
NW_011803911.1	520538	G	A	intron variant	LOC105204975	MODIFIER
NW_011803911.1	521211	C	T	intron variant	LOC105204975	MODIFIER
NW_011803911.1	521900	T	C	intron variant	LOC105204975	MODIFIER
NW_011803911.1	523135	A	G	intron variant	LOC105204975	MODIFIER
NW_011803911.1	530591	C	T	intron variant	LOC105204975	MODIFIER
NW_011803911.1	533710	T	G	intron variant	LOC105204975	MODIFIER
NW_011803911.1	544017	G	T	intron variant	LOC105204975	MODIFIER
NW_011803911.1	561818	G	A	intron variant	LOC105204975	MODIFIER
NW_011803911.1	562124	C	T	intron variant	LOC105204975	MODIFIER
NW_011803911.1	564231	T	C	intron variant	LOC105204975	MODIFIER
NW_011803911.1	566284	G	A	intron variant	LOC105204975	MODIFIER
NW_011803911.1	566639	T	C	intron variant	LOC105204975	MODIFIER
NW_011803911.1	566872	C	T	intron variant	LOC105204975	MODIFIER
NW_011803911.1	566888	A	G	intron variant	LOC105204975	MODIFIER
NW_011803911.1	567174	C	T	intron variant	LOC105204975	MODIFIER
NW_011803911.1	567249	C	T	intron variant	LOC105204975	MODIFIER
NW_011803911.1	568710	C	T	intron variant	LOC105204975	MODIFIER
NW_011803911.1	585953	T	A	intron variant	LOC105204975	MODIFIER
NW_011803911.1	586148	G	A	intron variant	LOC105204975	MODIFIER
NW_011803911.1	620974	T	C	intron variant	LOC105204975	MODIFIER
NW_011803911.1	626465	C	T	intron variant	LOC105204975	MODIFIER
NW_011803911.1	633123	T	C	upstream gene variant	LOC105204975	MODIFIER
NW_011803911.1	642508	A	G	intergenic region	LOC105204969-CHR_END	MODIFIER
NW_011803911.1	643046	T	C	intergenic region	LOC105204969-CHR_END	MODIFIER
NW_011803911.1	645286	C	T	intergenic region	LOC105204969-CHR_END	MODIFIER
NW_011803911.1	647747	T	C	intergenic region	LOC105204969-CHR_END	MODIFIER
NW_011803911.1	648604	G	A	intergenic region	LOC105204969-CHR_END	MODIFIER
NW_011803911.1	654651	C	T	intergenic region	LOC105204969-CHR_END	MODIFIER
NW_011800721.1	77904	T	C	intergenic region	LOC105201538-LOC105201519	MODIFIER
NW_011800721.1	79551	C	G	intergenic region	LOC105201538-LOC105201519	MODIFIER
NW_011800721.1	80341	C	A	intergenic region	LOC105201538-LOC105201519	MODIFIER
NW_011800721.1	80754	C	T	intergenic region	LOC105201538-LOC105201519	MODIFIER
NW_011800721.1	82826	T	C	intergenic region	LOC105201538-LOC105201519	MODIFIER
NW_011800721.1	82907	T	C	intergenic region	LOC105201538-LOC105201519	MODIFIER
NW_011800721.1	83027	G	A	intergenic region	LOC105201538-LOC105201519	MODIFIER
NW_011800721.1	83206	G	A	intergenic region	LOC105201538-LOC105201519	MODIFIER
NW_011800721.1	83329	A	T	intergenic region	LOC105201538-LOC105201519	MODIFIER
NW_011800721.1	86911	A	G	upstream gene variant	LOC105201519	MODIFIER
NW_011800721.1	87095	C	T	upstream gene variant	LOC105201519	MODIFIER
NW_011800721.1	87198	A	G	upstream gene variant	LOC105201519	MODIFIER
NW_011800721.1	87242	C	T	upstream gene variant	LOC105201519	MODIFIER
NW_011800721.1	87675	A	T	upstream gene variant	LOC105201519	MODIFIER
NW_011800721.1	88695	A	G	upstream gene variant	LOC105201519	MODIFIER
NW_011800721.1	90350	G	A	downstream gene variant	LOC105201520	MODIFIER
NW_011800721.1	90436	A	C	downstream gene variant	LOC105201520	MODIFIER
NW_011800721.1	90567	A	G	stop lost	LOC105201519	HIGH
NW_011800721.1	90692	G	A	stop gained	LOC105201519	HIGH
NW_011800721.1	90754	T	C	missense variant	LOC105201519	MODERATE
NW_011800721.1	91001	C	T	missense variant	LOC105201519	MODERATE
NW_011800721.1	91333	A	G	synonymous variant	LOC105201519	LOW
NW_011800721.1	91647	G	C	downstream gene variant	LOC105201519	MODIFIER
NW_011800721.1	91675	A	G	downstream gene variant	LOC105201519	MODIFIER
NW_011800721.1	93861	A	G	synonymous variant	LOC105201520	LOW
NW_011800721.1	97157	T	C	intron variant	LOC105201520	MODIFIER
NW_011800721.1	130966	C	T	synonymous variant	LOC105201526	LOW
NW_011800721.1	130972	C	A	missense variant	LOC105201526	MODERATE
NW_011800721.1	161303	T	C	upstream gene variant	LOC105201529	MODIFIER
NW_011800721.1	206399	C	T	intron variant	LOC105201534	MODIFIER
NW_011800721.1	239847	T	G	intron variant	LOC105201535	MODIFIER
NW_011800721.1	239881	T	C	intron variant	LOC105201535	MODIFIER
NW_011800721.1	240183	T	C	intron variant	LOC105201535	MODIFIER
NW_011800721.1	242044	C	T	intron variant	LOC105201535	MODIFIER
NW_011800721.1	243332	G	A	intron variant	LOC105201535	MODIFIER
NW_011800721.1	243753	G	A	intron variant	LOC105201535	MODIFIER
NW_011800721.1	244973	T	A	intron variant	LOC105201535	MODIFIER
NW_011800721.1	245303	C	T	intron variant	LOC105201535	MODIFIER
NW_011800721.1	245720	C	T	intron variant	LOC105201535	MODIFIER
NW_011800721.1	246931	C	T	intron variant	LOC105201535	MODIFIER
NW_011800721.1	253762	G	C	intron variant	LOC105201535	MODIFIER
NW_011800721.1	253797	T	C	intron variant	LOC105201535	MODIFIER
NW_011800721.1	253805	A	G	intron variant	LOC105201535	MODIFIER
NW_011800721.1	257631	G	A	intron variant	LOC105201535	MODIFIER
NW_011800721.1	279258	A	C	intron variant	LOC105201535	MODIFIER
NW_011800721.1	280181	G	T	intron variant	LOC105201535	MODIFIER
NW_011800721.1	280263	A	G	intron variant	LOC105201535	MODIFIER
NW_011800721.1	280456	A	G	intron variant	LOC105201535	MODIFIER
NW_011800721.1	292100	C	T	intron variant	LOC105201535	MODIFIER
NW_011800721.1	292408	C	T	intron variant	LOC105201535	MODIFIER
NW_011800721.1	294324	C	T	intron variant	LOC105201535	MODIFIER
NW_011800721.1	297281	A	T	intron variant	LOC105201535	MODIFIER
NW_011800721.1	300770	C	A	intron variant	LOC105201535	MODIFIER
NW_011800721.1	301116	G	A	intron variant	LOC105201535	MODIFIER
NW_011800721.1	301162	C	G	intron variant	LOC105201535	MODIFIER
NW_011800721.1	307741	A	C	intron variant	LOC105201535	MODIFIER
NW_011800721.1	313644	C	G	intron variant	LOC105201535	MODIFIER
NW_011800721.1	313652	A	G	intron variant	LOC105201535	MODIFIER
NW_011800721.1	316062	G	A	intron variant	LOC105201535	MODIFIER
NW_011800721.1	317241	G	A	intron variant	LOC105201535	MODIFIER
NW_011800721.1	318959	G	A	intron variant	LOC105201535	MODIFIER
NW_011800721.1	319101	T	C	intron variant	LOC105201535	MODIFIER
NW_011800721.1	320089	G	T	intron variant	LOC105201535	MODIFIER
NW_011800721.1	322157	C	T	intron variant	LOC105201535	MODIFIER
NW_011800721.1	322182	A	G	intron variant	LOC105201535	MODIFIER
NW_011800721.1	325010	C	T	intron variant	LOC105201535	MODIFIER
NW_011800721.1	325557	G	A	intron variant	LOC105201535	MODIFIER
NW_011800721.1	325680	A	G	intron variant	LOC105201535	MODIFIER
NW_011800721.1	325834	T	C	intron variant	LOC105201535	MODIFIER
NW_011800721.1	328427	C	T	intron variant	LOC105201535	MODIFIER
NW_011800721.1	329644	C	T	intron variant	LOC105201535	MODIFIER
NW_011800721.1	329998	G	A	intron variant	LOC105201535	MODIFIER
NW_011800721.1	339144	A	G	intron variant	LOC105201535	MODIFIER
NW_011800721.1	339160	C	T	intron variant	LOC105201535	MODIFIER
NW_011800721.1	341174	T	C	intron variant	LOC105201535	MODIFIER
NW_011800721.1	344420	G	A	intron variant	LOC105201535	MODIFIER
NW_011800721.1	347943	C	T	intron variant	LOC105201535	MODIFIER
NW_011800721.1	348742	C	T	intron variant	LOC105201535	MODIFIER
NW_011800721.1	349176	C	T	intron variant	LOC105201535	MODIFIER
NW_011800721.1	351225	G	A	intron variant	LOC105201535	MODIFIER
NW_011800721.1	363318	G	A	intron variant	LOC105201535	MODIFIER
NW_011800721.1	369208	C	T	intron variant	LOC105201535	MODIFIER
NW_011800721.1	369480	C	T	intron variant	LOC105201535	MODIFIER
NW_011800721.1	369541	T	A	intron variant	LOC105201535	MODIFIER
NW_011800721.1	371384	T	C	intron variant	LOC105201535	MODIFIER
NW_011800721.1	371395	T	A	intron variant	LOC105201535	MODIFIER
NW_011800721.1	371724	C	T	intron variant	LOC105201535	MODIFIER
NW_011800721.1	376965	A	G	upstream gene variant	LOC105201535	MODIFIER
NW_011800721.1	389056	C	T	intron variant	LOC105201535	MODIFIER
NW_011800721.1	407393	G	A	intron variant	LOC105201535	MODIFIER
NW_011800721.1	407400	C	T	intron variant	LOC105201535	MODIFIER
NW_011800721.1	412030	G	A	intron variant	LOC105201535	MODIFIER
NW_011800721.1	412090	G	T	intron variant	LOC105201535	MODIFIER
NW_011800721.1	416927	C	A	intron variant	LOC105201535	MODIFIER
NW_011800721.1	417746	A	C	intron variant	LOC105201535	MODIFIER
NW_011800721.1	435294	C	T	upstream gene variant	LOC105201536	MODIFIER
NW_011800721.1	436048	C	T	upstream gene variant	LOC105201536	MODIFIER
NW_011800721.1	436400	T	C	upstream gene variant	LOC105201536	MODIFIER
NW_011800721.1	440592	C	T	intron variant	LOC105201536	MODIFIER
NW_011800721.1	440667	G	A	intron variant	LOC105201536	MODIFIER
NW_011800721.1	444497	A	G	intron variant	LOC105201536	MODIFIER
NW_011800721.1	444537	C	T	intron variant	LOC105201536	MODIFIER
NW_011800721.1	444984	T	A	intron variant	LOC105201536	MODIFIER
NW_011800721.1	446482	G	A	missense variant	LOC105201536	MODERATE
NW_011800721.1	446689	A	G	missense variant	LOC105201536	MODERATE
NW_011800721.1	447450	A	G	missense variant	LOC105201536	MODERATE
NW_011800721.1	456888	G	A	intron variant	LOC105201541	MODIFIER
NW_011800721.1	457362	G	A	intron variant	LOC105201541	MODIFIER
NW_011800721.1	458458	G	A	missense variant	LOC105201541	MODERATE
NW_011800721.1	459482	T	A	missense variant	LOC105201541	MODERATE
NW_011800721.1	459547	T	A	missense variant	LOC105201541	MODERATE
NW_011800721.1	459600	A	G	synonymous variant	LOC105201541	LOW
NW_011800721.1	462076	G	A	missense variant	LOC105201541	MODERATE
NW_011800721.1	462530	G	A	missense variant	LOC105201541	MODERATE
NW_011800721.1	463372	A	T	3 prime UTR variant	LOC105201541	MODIFIER
NW_011800721.1	463623	C	A	downstream gene variant	LOC105201541	MODIFIER
NW_011800721.1	463714	A	G	downstream gene variant	LOC105201541	MODIFIER
NW_011800721.1	463731	A	C	downstream gene variant	LOC105201541	MODIFIER
NW_011800721.1	464710	T	C	downstream gene variant	LOC105201541	MODIFIER
NW_011800721.1	465806	T	C	downstream gene variant	LOC105201541	MODIFIER
NW_011800721.1	474261	T	C	intron variant	LOC105201542	MODIFIER
NW_011800721.1	475530	T	C	intron variant	LOC105201542	MODIFIER
NW_011800721.1	476206	T	A	intron variant	LOC105201542	MODIFIER
NW_011799419.1	15844	C	T	3 prime UTR variant	LOC105199289	MODIFIER
NW_011799419.1	16774	T	A	downstream gene variant	LOC105199289	MODIFIER
NW_011799419.1	16790	A	G	downstream gene variant	LOC105199289	MODIFIER
NW_011799419.1	17508	T	G	downstream gene variant	LOC105199289	MODIFIER
NW_011799419.1	18603	G	A	upstream gene variant	LOC105199290	MODIFIER
NW_011799419.1	18721	T	A	upstream gene variant	LOC105199290	MODIFIER
NW_011799419.1	18943	G	A	missense variant	LOC105199288	MODERATE
NW_011799419.1	23338	T	C	downstream gene variant	LOC105199288	MODIFIER
NW_011799419.1	23452	A	G	synonymous variant	LOC105199287	LOW
NW_011799419.1	23616	C	T	downstream gene variant	LOC105199288	MODIFIER
NW_011799419.1	25935	C	T	3 prime UTR variant	LOC105199291	MODIFIER
NW_011799419.1	30558	G	A	upstream gene variant	LOC105199291	MODIFIER
NW_011799419.1	30962	T	C	upstream gene variant	LOC105199291	MODIFIER
NW_011799419.1	31325	C	T	synonymous variant	LOC105199292	LOW
NW_011799419.1	38414	T	A	synonymous variant	LOC105199293	LOW
NW_011799419.1	45026	G	A	downstream gene variant	LOC105199293	MODIFIER
NW_011799419.1	47266	G	A	3 prime UTR variant	LOC105199297	MODIFIER
NW_011799419.1	47329	T	C	3 prime UTR variant	LOC105199297	MODIFIER
NW_011799419.1	50587	T	C	3 prime UTR variant	LOC105199299	MODIFIER
NW_011799419.1	52007	C	T	synonymous variant	LOC105199299	LOW
NW_011799419.1	52809	C	T	synonymous variant	LOC105199299	LOW
NW_011799419.1	53860	A	G	downstream gene variant	LOC105199297	MODIFIER
NW_011799419.1	53958	T	C	downstream gene variant	LOC105199297	MODIFIER
NW_011799419.1	57987	T	G	upstream gene variant	LOC105199298	MODIFIER
NW_011799419.1	58014	T	C	upstream gene variant	LOC105199298	MODIFIER
NW_011799419.1	59969	A	G	upstream gene variant	LOC105199298	MODIFIER
NW_011799419.1	97540	A	G	intergenic region	LOC105199300-LOC105199302	MODIFIER
NW_011799419.1	112037	C	A	3 prime UTR variant	LOC105199302	MODIFIER
NW_011799419.1	112091	G	A	3 prime UTR variant	LOC105199302	MODIFIER
NW_011799419.1	112904	T	C	3 prime UTR variant	LOC105199302	MODIFIER
NW_011799419.1	113231	G	C	3 prime UTR variant	LOC105199302	MODIFIER
NW_011799419.1	115476	C	T	downstream gene variant	LOC105199302	MODIFIER
NW_011799419.1	117055	G	A	missense variant	LOC105199304	MODERATE
NW_011799419.1	118782	G	A	downstream gene variant	LOC105199304	MODIFIER
NW_011799419.1	118798	C	T	downstream gene variant	LOC105199304	MODIFIER
NW_011799419.1	118841	A	G	synonymous variant	LOC105199303	LOW
NW_011799419.1	118970	G	A	synonymous variant	LOC105199303	LOW
NW_011799419.1	120461	G	A	downstream gene variant	LOC105199304	MODIFIER
NW_011799419.1	120810	T	A	downstream gene variant	LOC105199304	MODIFIER
NW_011799419.1	121404	C	A	missense variant	LOC105199303	MODERATE
NW_011799419.1	130088	C	T	intergenic region	LOC105199303-LOC105199305	MODIFIER
NW_011799419.1	140446	C	T	intergenic region	LOC105199303-LOC105199305	MODIFIER
NW_011799419.1	141076	T	A	intergenic region	LOC105199303-LOC105199305	MODIFIER
NW_011799419.1	142622	T	C	intergenic region	LOC105199303-LOC105199305	MODIFIER
NW_011799419.1	149146	A	T	intergenic region	LOC105199303-LOC105199305	MODIFIER
NW_011799419.1	159669	G	A	5 prime UTR variant	LOC105199305	MODIFIER
NW_011799419.1	161266	C	T	intron variant	LOC105199305	MODIFIER
NW_011799419.1	161283	A	T	intron variant	LOC105199305	MODIFIER
NW_011799419.1	161759	G	A	intron variant	LOC105199305	MODIFIER
NW_011799419.1	169919	T	C	intron variant	LOC105199305	MODIFIER
NW_011799419.1	169945	A	T	intron variant	LOC105199305	MODIFIER
NW_011799419.1	176987	C	T	intron variant	LOC105199305	MODIFIER
NW_011799419.1	177083	C	A	intron variant	LOC105199305	MODIFIER
NW_011799419.1	177999	G	A	intron variant	LOC105199305	MODIFIER
NW_011799419.1	204016	G	C	intergenic region	LOC105199305-LOC105199306	MODIFIER
NW_011799419.1	214046	T	C	intergenic region	LOC105199305-LOC105199306	MODIFIER
NW_011799419.1	247683	A	G	intergenic region	LOC105199305-LOC105199306	MODIFIER
NW_011799419.1	248881	A	C	intergenic region	LOC105199305-LOC105199306	MODIFIER
NW_011799419.1	250655	C	T	intergenic region	LOC105199305-LOC105199306	MODIFIER
NW_011799419.1	260380	G	A	intergenic region	LOC105199305-LOC105199306	MODIFIER
NW_011799419.1	271078	A	C	intergenic region	LOC105199305-LOC105199306	MODIFIER
NW_011799419.1	272981	C	T	intergenic region	LOC105199305-LOC105199306	MODIFIER
NW_011799419.1	277630	C	T	intergenic region	LOC105199305-LOC105199306	MODIFIER
NW_011799419.1	295016	G	A	intron variant	LOC105199306	MODIFIER
NW_011799419.1	313974	G	A	intron variant	LOC105199306	MODIFIER
NW_011799419.1	329744	G	A	upstream gene variant	LOC105199306	MODIFIER
NW_011799419.1	332943	A	G	upstream gene variant	LOC105199306	MODIFIER
NW_011799419.1	333744	C	T	upstream gene variant	LOC105199306	MODIFIER
NW_011799419.1	333882	T	G	upstream gene variant	LOC105199306	MODIFIER
NW_011799419.1	335465	T	A	downstream gene variant	LOC105199308	MODIFIER
NW_011799419.1	337528	C	T	synonymous variant	LOC105199307	LOW
NW_011799419.1	343148	C	T	upstream gene variant	LOC105199308	MODIFIER
NW_011799419.1	343300	T	C	upstream gene variant	LOC105199308	MODIFIER
NW_011799419.1	343829	T	A	upstream gene variant	LOC105199308	MODIFIER
NW_011799419.1	346437	T	A	3 prime UTR variant	LOC105199310	MODIFIER
NW_011799419.1	353337	C	T	upstream gene variant	LOC105199313	MODIFIER
NW_011799419.1	353351	C	T	upstream gene variant	LOC105199313	MODIFIER
NW_011799419.1	354402	A	G	splice region variant&intron variant	LOC105199309	LOW
NW_011799419.1	354622	G	A	synonymous variant	LOC105199309	LOW
NW_011799419.1	354631	G	A	synonymous variant	LOC105199309	LOW
NW_011799419.1	355840	C	T	synonymous variant	LOC105199309	LOW
NW_011799419.1	358601	C	A	upstream gene variant	LOC105199309	MODIFIER
NW_011799419.1	359026	C	T	synonymous variant	LOC105199313	LOW
NW_011799419.1	359400	A	G	3 prime UTR variant	LOC105199313	MODIFIER
NW_011799419.1	360763	G	A	splice region variant&synonymous variant	LOC105199311	LOW
NW_011799419.1	363829	C	T	5 prime UTR variant	LOC105199314	MODIFIER
NW_011799419.1	364926	C	T	upstream gene variant	LOC105199311	MODIFIER
NW_011799419.1	365316	C	T	synonymous variant	LOC105199314	LOW
NW_011799419.1	377397	G	A	upstream gene variant	LOC105199316	MODIFIER
NW_011799419.1	383514	A	G	intergenic region	LOC105199316-LOC105199317	MODIFIER
NW_011799419.1	384846	C	T	intergenic region	LOC105199316-LOC105199317	MODIFIER
NW_011799419.1	395109	G	A	downstream gene variant	LOC105199317	MODIFIER
NW_011799419.1	402414	G	A	synonymous variant	LOC105199317	LOW
NW_011799419.1	404893	G	A	intron variant	LOC105199317	MODIFIER
NW_011799419.1	405583	C	T	intron variant	LOC105199317	MODIFIER
NW_011799419.1	405669	A	G	intron variant	LOC105199317	MODIFIER
NW_011799419.1	411127	C	T	intron variant	LOC105199317	MODIFIER
NW_011799419.1	412873	C	T	intron variant	LOC105199317	MODIFIER
NW_011799419.1	413318	C	T	intron variant	LOC105199317	MODIFIER
NW_011799419.1	413790	G	A	intron variant	LOC105199317	MODIFIER
NW_011799419.1	417224	C	A	intron variant	LOC105199317	MODIFIER
NW_011799419.1	421450	A	C	intron variant	LOC105199317	MODIFIER
NW_011799419.1	423524	C	T	intron variant	LOC105199317	MODIFIER
NW_011799419.1	431054	C	T	intron variant	LOC105199317	MODIFIER
NW_011799419.1	436515	G	C	intron variant	LOC105199317	MODIFIER
NW_011799419.1	437588	G	A	intron variant	LOC105199317	MODIFIER
NW_011799419.1	439047	G	C	intron variant	LOC105199317	MODIFIER
NW_011799419.1	447964	A	G	intron variant	LOC105199317	MODIFIER
NW_011799419.1	449281	C	T	intron variant	LOC105199317	MODIFIER
NW_011799419.1	450641	G	A	intron variant	LOC105199317	MODIFIER
NW_011799419.1	451569	C	T	intron variant	LOC105199317	MODIFIER
NW_011799419.1	460085	C	T	intron variant	LOC105199317	MODIFIER
NW_011799419.1	461092	A	G	intron variant	LOC105199317	MODIFIER
NW_011799419.1	468382	T	A	intron variant	LOC105199317	MODIFIER
NW_011799419.1	470592	G	A	intron variant	LOC105199317	MODIFIER
NW_011799419.1	470667	G	A	intron variant	LOC105199317	MODIFIER
NW_011799419.1	470730	G	A	intron variant	LOC105199317	MODIFIER
NW_011799419.1	471270	G	A	intron variant	LOC105199317	MODIFIER
NW_011799419.1	477441	G	A	intron variant	LOC105199317	MODIFIER
NW_011799419.1	489327	C	T	intron variant	LOC105199317	MODIFIER
NW_011799419.1	494997	C	T	intron variant	LOC105199317	MODIFIER
NW_011799419.1	496214	C	G	intron variant	LOC105199317	MODIFIER
NW_011799419.1	497952	C	T	intron variant	LOC105199317	MODIFIER
NW_011799419.1	506471	T	A	intron variant	LOC105199317	MODIFIER
NW_011799419.1	506544	T	C	intron variant	LOC105199317	MODIFIER
NW_011799419.1	511708	G	A	intron variant	LOC105199317	MODIFIER
NW_011799419.1	516208	C	G	intron variant	LOC105199317	MODIFIER
NW_011799419.1	521925	G	A	intron variant	LOC105199317	MODIFIER
NW_011799419.1	523806	G	A	intron variant	LOC105199317	MODIFIER
NW_011799419.1	525779	T	G	intron variant	LOC105199317	MODIFIER
NW_011799419.1	525929	C	G	intron variant	LOC105199317	MODIFIER
NW_011799419.1	525957	C	T	intron variant	LOC105199317	MODIFIER
NW_011799419.1	527471	G	A	intron variant	LOC105199317	MODIFIER
NW_011799419.1	539726	G	A	intron variant	LOC105199317	MODIFIER
NW_011799419.1	540365	G	A	intron variant	LOC105199317	MODIFIER
NW_011799419.1	541663	G	A	intron variant	LOC105199317	MODIFIER
NW_011799419.1	543027	C	T	intron variant	LOC105199317	MODIFIER
NW_011799419.1	545635	A	G	intron variant	LOC105199317	MODIFIER
NW_011799419.1	545645	T	A	intron variant	LOC105199317	MODIFIER
NW_011799419.1	545943	T	A	intron variant	LOC105199317	MODIFIER
NW_011799419.1	546248	G	A	intron variant	LOC105199317	MODIFIER
NW_011799419.1	549621	A	C	intron variant	LOC105199317	MODIFIER
NW_011799419.1	550020	T	C	intron variant	LOC105199317	MODIFIER
NW_011799419.1	552392	C	T	intron variant	LOC105199317	MODIFIER
NW_011799419.1	554853	C	T	intron variant	LOC105199317	MODIFIER
NW_011799419.1	554955	G	A	intron variant	LOC105199317	MODIFIER
NW_011799419.1	558686	G	A	intron variant	LOC105199317	MODIFIER
NW_011799419.1	558709	C	T	intron variant	LOC105199317	MODIFIER
NW_011799419.1	559385	C	T	intron variant	LOC105199317	MODIFIER
NW_011799419.1	559422	G	C	intron variant	LOC105199317	MODIFIER
NW_011799419.1	564351	G	A	intron variant	LOC105199317	MODIFIER
NW_011799419.1	564481	G	A	intron variant	LOC105199317	MODIFIER
NW_011799419.1	565582	G	A	intron variant	LOC105199317	MODIFIER
NW_011799419.1	566356	A	C	intron variant	LOC105199317	MODIFIER
NW_011799419.1	566377	C	T	intron variant	LOC105199317	MODIFIER
NW_011799419.1	566382	C	G	intron variant	LOC105199317	MODIFIER
NW_011799419.1	567530	C	T	intron variant	LOC105199317	MODIFIER
NW_011799419.1	569137	G	A	intron variant	LOC105199317	MODIFIER
NW_011799419.1	570289	C	T	intron variant	LOC105199317	MODIFIER
NW_011799419.1	577220	C	T	upstream gene variant	LOC105199317	MODIFIER
NW_011799419.1	579978	T	C	intergenic region	LOC105199317-LOC105199318	MODIFIER
NW_011799419.1	580268	C	T	intergenic region	LOC105199317-LOC105199318	MODIFIER
NW_011799419.1	584157	C	A	intergenic region	LOC105199317-LOC105199318	MODIFIER
NW_011799419.1	585148	C	T	intergenic region	LOC105199317-LOC105199318	MODIFIER
NW_011799419.1	588285	C	T	intergenic region	LOC105199317-LOC105199318	MODIFIER
NW_011799419.1	589737	G	A	intergenic region	LOC105199317-LOC105199318	MODIFIER
NW_011799419.1	589874	C	T	intergenic region	LOC105199317-LOC105199318	MODIFIER
NW_011799419.1	590516	C	T	intergenic region	LOC105199317-LOC105199318	MODIFIER
NW_011799419.1	594350	G	A	intergenic region	LOC105199317-LOC105199318	MODIFIER
NW_011799419.1	601754	A	C	intergenic region	LOC105199317-LOC105199318	MODIFIER
NW_011799419.1	602184	C	T	intergenic region	LOC105199317-LOC105199318	MODIFIER
NW_011799419.1	602207	G	A	intergenic region	LOC105199317-LOC105199318	MODIFIER
NW_011799419.1	608614	C	T	downstream gene variant	LOC105199318	MODIFIER
NW_011799419.1	610692	C	T	intron variant	LOC105199318	MODIFIER
NW_011799419.1	623123	C	T	intron variant	LOC105199320	MODIFIER
NW_011799419.1	631723	C	A	upstream gene variant	LOC105199320	MODIFIER
NW_011799419.1	643331	G	T	intron variant	LOC105199320	MODIFIER
NW_011799419.1	646787	A	T	intron variant	LOC105199320	MODIFIER
NW_011799419.1	650056	T	G	intron variant	LOC105199320	MODIFIER
NW_011799419.1	653445	G	A	intron variant	LOC105199320	MODIFIER
NW_011799419.1	656034	C	T	intron variant	LOC105199320	MODIFIER
NW_011799419.1	656914	C	T	intron variant	LOC105199320	MODIFIER
NW_011799419.1	657430	G	A	intron variant	LOC105199320	MODIFIER
NW_011799419.1	657629	G	A	intron variant	LOC105199320	MODIFIER
NW_011799419.1	662422	C	T	intron variant	LOC105199320	MODIFIER
NW_011799419.1	662541	A	T	intron variant	LOC105199320	MODIFIER
NW_011799419.1	670128	T	G	intron variant	LOC105199320	MODIFIER
NW_011799419.1	670210	G	C	intron variant	LOC105199320	MODIFIER
NW_011799419.1	676524	A	G	intron variant	LOC105199320	MODIFIER
NW_011799419.1	679905	C	T	missense variant	LOC105199320	MODERATE
NW_011799419.1	682420	C	T	intron variant	LOC105199320	MODIFIER
NW_011799419.1	685829	A	T	intron variant	LOC105199320	MODIFIER
NW_011799419.1	706091	C	T	intron variant	LOC105199322	MODIFIER
NW_011799419.1	708411	C	T	intron variant	LOC105199322	MODIFIER
NW_011799419.1	708815	G	A	intron variant	LOC105199322	MODIFIER
NW_011799419.1	708893	T	A	intron variant	LOC105199322	MODIFIER
NW_011799419.1	709132	C	T	intron variant	LOC105199322	MODIFIER
NW_011799419.1	709151	G	A	intron variant	LOC105199322	MODIFIER
NW_011799419.1	712642	C	T	intron variant	LOC105199322	MODIFIER
NW_011799419.1	713069	C	T	intron variant	LOC105199322	MODIFIER
NW_011799419.1	713396	C	T	intron variant	LOC105199322	MODIFIER
NW_011799419.1	713517	G	A	intron variant	LOC105199322	MODIFIER
NW_011799419.1	714589	C	T	intron variant	LOC105199322	MODIFIER
NW_011799419.1	717068	A	G	intron variant	LOC105199322	MODIFIER
NW_011799419.1	722712	A	G	intron variant	LOC105199322	MODIFIER
NW_011799419.1	723742	C	T	intron variant	LOC105199322	MODIFIER
NW_011799419.1	725586	G	A	intron variant	LOC105199322	MODIFIER
NW_011799419.1	733748	G	A	intron variant	LOC105199322	MODIFIER
NW_011799419.1	737484	A	G	intron variant	LOC105199322	MODIFIER
NW_011799419.1	739973	G	A	upstream gene variant	LOC105199322	MODIFIER
NW_011799419.1	748544	C	T	intron variant	LOC105199322	MODIFIER
NW_011799419.1	748990	C	T	intron variant	LOC105199322	MODIFIER
NW_011799419.1	772812	A	G	downstream gene variant	LOC105199323	MODIFIER
NW_011799419.1	773846	G	A	downstream gene variant	LOC105199329	MODIFIER
NW_011799419.1	776866	C	T	upstream gene variant	LOC105199323	MODIFIER
NW_011799419.1	776927	A	G	upstream gene variant	LOC105199323	MODIFIER
NW_011799419.1	777229	A	G	upstream gene variant	LOC105199323	MODIFIER
NW_011799419.1	783596	A	G	upstream gene variant	LOC105199329	MODIFIER
NW_011799419.1	783788	G	A	upstream gene variant	LOC105199329	MODIFIER
NW_011799419.1	784602	G	A	synonymous variant	LOC105199327	LOW
NW_011799419.1	784701	G	A	upstream gene variant	LOC105199328	MODIFIER
NW_011799419.1	839550	C	T	upstream gene variant	LOC105199335	MODIFIER
NW_011799419.1	851505	A	G	intron variant	LOC105199334	MODIFIER
NW_011799419.1	856882	C	A	intron variant	LOC105199334	MODIFIER
NW_011799419.1	880486	T	C	splice region variant&intron variant	LOC105199337	LOW
NW_011799419.1	885945	A	G	3 prime UTR variant	LOC105199338	MODIFIER
NW_011799419.1	886651	C	G	3 prime UTR variant	LOC105199338	MODIFIER
NW_011799419.1	887568	G	T	downstream gene variant	LOC105199338	MODIFIER
NW_011799419.1	887886	C	T	downstream gene variant	LOC105199338	MODIFIER
NW_011799419.1	894611	T	A	downstream gene variant	LOC105199355	MODIFIER
NW_011799419.1	895188	T	C	downstream gene variant	LOC105199355	MODIFIER
NW_011799419.1	904239	C	T	intron variant	LOC105199355	MODIFIER
NW_011799419.1	904418	C	T	intron variant	LOC105199355	MODIFIER
NW_011799419.1	904953	G	A	intron variant	LOC105199355	MODIFIER
NW_011799419.1	912776	T	C	intron variant	LOC105199355	MODIFIER
NW_011799419.1	912785	C	T	intron variant	LOC105199355	MODIFIER
NW_011799419.1	917208	C	T	intron variant	LOC105199355	MODIFIER
NW_011799419.1	917977	C	T	missense variant	LOC105199355	MODERATE
NW_011799419.1	924341	C	T	downstream gene variant	LOC105199340	MODIFIER
NW_011799419.1	924377	A	G	downstream gene variant	LOC105199340	MODIFIER
NW_011799419.1	947517	G	A	downstream gene variant	LOC105199341	MODIFIER
NW_011799419.1	948077	A	G	downstream gene variant	LOC105199343	MODIFIER
NW_011799419.1	948150	C	T	downstream gene variant	LOC105199343	MODIFIER
NW_011799419.1	948448	C	A	synonymous variant	LOC105199342	LOW
NW_011799419.1	950384	G	A	downstream gene variant	LOC105199342	MODIFIER
NW_011799419.1	952645	A	G	synonymous variant	LOC105199343	LOW
NW_011799419.1	952843	C	T	synonymous variant	LOC105199343	LOW
NW_011799419.1	953891	C	T	synonymous variant	LOC105199343	LOW
NW_011799419.1	966384	T	A	upstream gene variant	LOC105199345	MODIFIER
NW_011799419.1	968917	G	A	upstream gene variant	LOC105199356	MODIFIER
NW_011799419.1	990327	T	C	intron variant	LOC105199346	MODIFIER
NW_011799419.1	990380	T	C	intron variant	LOC105199346	MODIFIER
NW_011799419.1	990937	T	C	intron variant	LOC105199346	MODIFIER
NW_011799419.1	991988	C	T	intron variant	LOC105199346	MODIFIER
NW_011799419.1	992030	G	C	intron variant	LOC105199346	MODIFIER
NW_011799419.1	992325	A	G	intron variant	LOC105199346	MODIFIER
NW_011799419.1	998205	C	T	synonymous variant	LOC105199346	LOW
NW_011799419.1	1002731	A	G	3 prime UTR variant	LOC105199346	MODIFIER
NW_011799419.1	1003521	C	T	3 prime UTR variant	LOC105199346	MODIFIER
NW_011799419.1	1003839	G	A	3 prime UTR variant	LOC105199346	MODIFIER
NW_011799419.1	1004725	G	A	3 prime UTR variant	LOC105199346	MODIFIER
NW_011799419.1	1008025	A	T	downstream gene variant	LOC105199346	MODIFIER
NW_011799419.1	1008415	T	G	downstream gene variant	LOC105199346	MODIFIER
NW_011799419.1	1010903	C	T	downstream gene variant	LOC105199349	MODIFIER
NW_011799419.1	1011320	A	G	downstream gene variant	LOC105199349	MODIFIER
NW_011799419.1	1014510	A	G	downstream gene variant	LOC105199349	MODIFIER
NW_011799419.1	1015092	T	G	downstream gene variant	LOC105199349	MODIFIER
NW_011799419.1	1017533	C	T	intron variant	LOC105199349	MODIFIER
NW_011799419.1	1018441	T	C	intron variant	LOC105199349	MODIFIER
NW_011799419.1	1018667	A	G	intron variant	LOC105199349	MODIFIER
NW_011799419.1	1018729	T	C	intron variant	LOC105199349	MODIFIER
NW_011799419.1	1020438	C	T	intron variant	LOC105199349	MODIFIER
NW_011799419.1	1020523	T	G	intron variant	LOC105199349	MODIFIER
NW_011799419.1	1025120	G	A	intron variant	LOC105199349	MODIFIER
NW_011799419.1	1025643	A	C	intron variant	LOC105199349	MODIFIER
NW_011799419.1	1026250	C	T	intron variant	LOC105199349	MODIFIER
NW_011799419.1	1034279	C	T	intron variant	LOC105199349	MODIFIER
NW_011799419.1	1034387	G	A	intron variant	LOC105199349	MODIFIER
NW_011799419.1	1034515	C	A	intron variant	LOC105199349	MODIFIER
NW_011799419.1	1034616	A	C	intron variant	LOC105199349	MODIFIER
NW_011799419.1	1035444	C	T	intron variant	LOC105199349	MODIFIER
NW_011799419.1	1036232	G	A	intron variant	LOC105199349	MODIFIER
NW_011799419.1	1036566	G	A	intron variant	LOC105199349	MODIFIER
NW_011799419.1	1037925	C	T	intron variant	LOC105199349	MODIFIER
NW_011799419.1	1037936	G	A	intron variant	LOC105199349	MODIFIER
NW_011799419.1	1039934	C	T	intron variant	LOC105199349	MODIFIER
NW_011799419.1	1040178	T	A	intron variant	LOC105199349	MODIFIER
NW_011799419.1	1041372	C	T	intron variant	LOC105199349	MODIFIER
NW_011799419.1	1041803	G	A	intron variant	LOC105199349	MODIFIER
NW_011799419.1	1049113	A	G	upstream gene variant	LOC105199349	MODIFIER
NW_011799419.1	1098583	A	C	downstream gene variant	LOC105199358	MODIFIER
NW_011799419.1	1098606	A	T	downstream gene variant	LOC105199358	MODIFIER
NW_011799419.1	1098682	G	A	downstream gene variant	LOC105199358	MODIFIER
NW_011799419.1	1100946	T	C	3 prime UTR variant	LOC105199351	MODIFIER
NW_011799419.1	1101022	C	T	3 prime UTR variant	LOC105199351	MODIFIER
NW_011799419.1	1101234	T	A	3 prime UTR variant	LOC105199351	MODIFIER
NW_011799419.1	1101888	G	A	3 prime UTR variant	LOC105199351	MODIFIER
NW_011799419.1	1102199	G	A	3 prime UTR variant	LOC105199351	MODIFIER
NW_011799419.1	1102447	G	C	3 prime UTR variant	LOC105199351	MODIFIER
NW_011801243.1	97550	G	A	intron variant	LOC105203024	MODIFIER
NW_011801243.1	103205	A	T	intron variant	LOC105203024	MODIFIER
NW_011801243.1	103351	C	T	intron variant	LOC105203024	MODIFIER
NW_011801243.1	104660	C	T	intron variant	LOC105203024	MODIFIER
NW_011801243.1	112881	C	T	intron variant	LOC105203024	MODIFIER
NW_011801243.1	115023	C	T	intron variant	LOC105203024	MODIFIER
NW_011801243.1	116159	T	G	intron variant	LOC105203024	MODIFIER
NW_011801243.1	187815	C	T	intron variant	LOC105203024	MODIFIER
NW_011801243.1	195261	G	A	intron variant	LOC105203024	MODIFIER
NW_011801243.1	199046	T	A	intron variant	LOC105203024	MODIFIER
NW_011801243.1	239639	T	G	3 prime UTR variant	LOC105203024	MODIFIER
NW_011801243.1	306722	T	C	intergenic region	LOC105203027-LOC105203085	MODIFIER
NW_011801243.1	306829	C	T	intergenic region	LOC105203027-LOC105203085	MODIFIER
NW_011801243.1	306870	A	G	intergenic region	LOC105203027-LOC105203085	MODIFIER
NW_011801243.1	309039	C	T	intergenic region	LOC105203027-LOC105203085	MODIFIER
NW_011801243.1	310046	G	A	intergenic region	LOC105203027-LOC105203085	MODIFIER
NW_011801243.1	320836	C	T	intergenic region	LOC105203027-LOC105203085	MODIFIER
NW_011801243.1	320863	A	G	intergenic region	LOC105203027-LOC105203085	MODIFIER
NW_011801243.1	323305	C	T	intergenic region	LOC105203027-LOC105203085	MODIFIER
NW_011801243.1	328028	G	A	intergenic region	LOC105203027-LOC105203085	MODIFIER
NW_011801243.1	331708	G	A	intergenic region	LOC105203027-LOC105203085	MODIFIER
NW_011801243.1	331878	C	T	intergenic region	LOC105203027-LOC105203085	MODIFIER
NW_011801243.1	335004	C	T	intergenic region	LOC105203027-LOC105203085	MODIFIER
NW_011801243.1	342768	A	T	intergenic region	LOC105203027-LOC105203085	MODIFIER
NW_011801243.1	349474	T	A	intergenic region	LOC105203027-LOC105203085	MODIFIER
NW_011801243.1	351446	C	T	intergenic region	LOC105203027-LOC105203085	MODIFIER
NW_011801243.1	352666	G	A	upstream gene variant	LOC105203085	MODIFIER
NW_011801243.1	354845	G	C	upstream gene variant	LOC105203085	MODIFIER
NW_011801243.1	362754	C	T	intron variant	LOC105203085	MODIFIER
NW_011801243.1	369765	A	G	intron variant	LOC105203085	MODIFIER
NW_011801243.1	370864	C	T	intron variant	LOC105203085	MODIFIER
NW_011801243.1	378150	C	T	downstream gene variant	LOC105203085	MODIFIER
NW_011801243.1	402095	A	G	downstream gene variant	LOC105203088	MODIFIER
NW_011801243.1	402105	C	T	downstream gene variant	LOC105203088	MODIFIER
NW_011801243.1	403150	C	G	upstream gene variant	LOC105203089	MODIFIER
NW_011801243.1	405043	A	T	upstream gene variant	LOC105203087	MODIFIER
NW_011801243.1	405059	G	A	upstream gene variant	LOC105203087	MODIFIER
NW_011801243.1	416570	A	G	upstream gene variant	LOC105203029	MODIFIER
NW_011801243.1	417351	C	T	upstream gene variant	LOC105203029	MODIFIER
NW_011801243.1	418082	T	C	upstream gene variant	LOC105203029	MODIFIER
NW_011801243.1	445577	T	C	intron variant	LOC105203034	MODIFIER
NW_011801243.1	453429	G	C	intron variant	LOC105203035	MODIFIER
NW_011801243.1	453495	A	G	intron variant	LOC105203035	MODIFIER
NW_011801243.1	478976	A	G	upstream gene variant	LOC105203037	MODIFIER
NW_011801243.1	481763	C	T	upstream gene variant	LOC105203037	MODIFIER
NW_011801243.1	483739	G	A	upstream gene variant	LOC105203037	MODIFIER
NW_011801243.1	484115	T	A	upstream gene variant	LOC105203037	MODIFIER
NW_011801243.1	484569	G	T	upstream gene variant	LOC105203037	MODIFIER
NW_011801243.1	484660	A	G	upstream gene variant	LOC105203037	MODIFIER
NW_011801243.1	485051	C	T	upstream gene variant	LOC105203037	MODIFIER
NW_011801243.1	486472	A	G	intron variant	LOC105203038	MODIFIER
NW_011801243.1	488312	T	C	upstream gene variant	LOC105203036	MODIFIER
NW_011801243.1	488371	C	T	upstream gene variant	LOC105203036	MODIFIER
NW_011801243.1	489830	C	A	upstream gene variant	LOC105203036	MODIFIER
NW_011801243.1	490646	A	G	3 prime UTR variant	LOC105203037	MODIFIER
NW_011801243.1	491353	T	G	upstream gene variant	LOC105203036	MODIFIER
NW_011801243.1	501064	A	C	3 prime UTR variant	LOC105203036	MODIFIER
NW_011801243.1	502571	G	C	missense variant	LOC105203040	MODERATE
NW_011801243.1	507668	C	T	downstream gene variant	LOC105203040	MODIFIER
NW_011801243.1	508474	C	T	downstream gene variant	LOC105203040	MODIFIER
NW_011801243.1	511541	C	T	intron variant	LOC105203041	MODIFIER
NW_011801243.1	512213	G	T	intron variant	LOC105203041	MODIFIER
NW_011801243.1	513864	C	T	intron variant	LOC105203041	MODIFIER
NW_011801243.1	517339	T	A	intron variant	LOC105203041	MODIFIER
NW_011801243.1	517662	C	A	intron variant	LOC105203041	MODIFIER
NW_011801243.1	517706	C	T	intron variant	LOC105203041	MODIFIER
NW_011801243.1	527958	C	T	intron variant	LOC105203041	MODIFIER
NW_011801243.1	531627	G	A	intron variant	LOC105203041	MODIFIER
NW_011801243.1	532419	C	T	intron variant	LOC105203041	MODIFIER
NW_011801243.1	532519	C	T	intron variant	LOC105203041	MODIFIER
NW_011801243.1	535062	T	C	intron variant	LOC105203041	MODIFIER
NW_011801243.1	537611	T	C	downstream gene variant	LOC105192719-2	MODIFIER
NW_011801243.1	537624	T	C	downstream gene variant	LOC105192719-2	MODIFIER
NW_011801243.1	539495	G	A	downstream gene variant	LOC105192719-2	MODIFIER
NW_011801243.1	541547	A	G	upstream gene variant	LOC105192719-2	MODIFIER
NW_011801243.1	541586	C	T	upstream gene variant	LOC105192719-2	MODIFIER
NW_011801243.1	544741	G	A	3 prime UTR variant	LOC105203041	MODIFIER
NW_011801243.1	544828	G	A	3 prime UTR variant	LOC105203041	MODIFIER
NW_011801243.1	545485	A	T	downstream gene variant	LOC105203041	MODIFIER
NW_011801243.1	546027	A	T	downstream gene variant	LOC105203041	MODIFIER
NW_011801243.1	548803	A	G	downstream gene variant	LOC105203041	MODIFIER
NW_011801243.1	549311	T	A	downstream gene variant	LOC105203041	MODIFIER
NW_011801243.1	549636	C	T	downstream gene variant	LOC105203041	MODIFIER
NW_011801243.1	551629	A	T	intergenic region	LOC105203041-LOC105203092	MODIFIER
NW_011801243.1	551645	A	G	intergenic region	LOC105203041-LOC105203092	MODIFIER
NW_011801243.1	553737	C	T	upstream gene variant	LOC105203092	MODIFIER
NW_011801243.1	553869	G	A	upstream gene variant	LOC105203092	MODIFIER
NW_011801243.1	557201	A	G	upstream gene variant	LOC105203092	MODIFIER
NW_011801243.1	557566	C	T	upstream gene variant	LOC105203092	MODIFIER
NW_011801243.1	558143	C	T	splice region variant	LOC105203092	LOW
NW_011801243.1	637534	T	C	upstream gene variant	LOC105203095	MODIFIER
NW_011801243.1	639589	C	T	upstream gene variant	LOC105203095	MODIFIER
NW_011801243.1	640481	G	A	upstream gene variant	LOC105203095	MODIFIER
NW_011801243.1	661275	G	A	upstream gene variant	LOC105203047	MODIFIER
NW_011801243.1	666877	A	G	upstream gene variant	LOC105203049	MODIFIER
NW_011801243.1	668693	G	A	upstream gene variant	LOC105203050	MODIFIER
NW_011801243.1	670573	A	T	upstream gene variant	LOC105203050	MODIFIER
NW_011801243.1	670590	G	C	upstream gene variant	LOC105203050	MODIFIER
NW_011801243.1	691307	C	T	upstream gene variant	LOC105203053	MODIFIER
NW_011801243.1	693781	C	T	missense variant	LOC105203053	MODERATE
NW_011801243.1	695700	C	T	missense variant	LOC105203053	MODERATE
NW_011801243.1	697712	G	A	synonymous variant	LOC105203053	LOW
NW_011801243.1	700542	C	T	missense variant	LOC105203053	MODERATE
NW_011801243.1	702960	A	G	upstream gene variant	LOC105203054	MODIFIER
NW_011801243.1	707374	T	C	downstream gene variant	LOC105203053	MODIFIER
NW_011801243.1	709112	T	C	downstream gene variant	LOC105203054	MODIFIER
NW_011801243.1	709123	A	G	downstream gene variant	LOC105203054	MODIFIER
NW_011801243.1	746331	C	A	upstream gene variant	LOC105203069	MODIFIER
NW_011801243.1	746579	G	A	upstream gene variant	LOC105203069	MODIFIER
NW_011801243.1	747512	T	C	missense variant&splice region variant	LOC105203058	MODERATE
NW_011801243.1	750594	C	T	upstream gene variant	LOC105203058	MODIFIER
NW_011801243.1	753762	G	A	downstream gene variant	LOC105203068	MODIFIER
NW_011801243.1	754968	C	T	downstream gene variant	LOC105203068	MODIFIER
NW_011801243.1	755614	G	A	upstream gene variant	LOC105203067	MODIFIER
NW_011801243.1	781143	G	C	intron variant	LOC105203066	MODIFIER
NW_011801243.1	785999	C	T	upstream gene variant	LOC105203065	MODIFIER
NW_011801243.1	788327	G	A	intron variant	LOC105203066	MODIFIER
NW_011801243.1	788710	C	T	missense variant	LOC105203065	MODERATE
NW_011801243.1	790768	A	G	synonymous variant	LOC105203065	LOW
NW_011801243.1	791169	G	A	missense variant	LOC105203065	MODERATE
NW_011801243.1	791598	T	A	3 prime UTR variant	LOC105203065	MODIFIER
NW_011801243.1	791762	T	C	upstream gene variant	LOC105203064	MODIFIER
NW_011801243.1	791977	G	A	upstream gene variant	LOC105203064	MODIFIER
NW_011801243.1	794991	C	T	5 prime UTR premature start codon gain variant	LOC105203064	LOW
NW_011801243.1	795177	G	A	upstream gene variant	LOC105203063	MODIFIER
NW_011801243.1	795481	G	T	upstream gene variant	LOC105203063	MODIFIER
NW_011801243.1	795535	C	T	synonymous variant	LOC105203064	LOW
NW_011801243.1	799966	A	G	missense variant	LOC105203061	MODERATE
NW_011801243.1	812175	T	A	intron variant	LOC105203066	MODIFIER
NW_011801243.1	812419	A	T	intron variant	LOC105203066	MODIFIER
NW_011801243.1	812432	A	G	intron variant	LOC105203066	MODIFIER
NW_011801243.1	812504	A	G	intron variant	LOC105203066	MODIFIER
NW_011801243.1	812750	A	G	intron variant	LOC105203066	MODIFIER
NW_011801243.1	814081	T	C	intron variant	LOC105203066	MODIFIER
NW_011801243.1	814381	T	C	intron variant	LOC105203066	MODIFIER
NW_011801243.1	814398	C	T	intron variant	LOC105203066	MODIFIER
NW_011801243.1	815315	C	A	intron variant	LOC105203066	MODIFIER
NW_011801243.1	818803	T	C	intron variant	LOC105203066	MODIFIER
NW_011801243.1	819052	A	G	intron variant	LOC105203066	MODIFIER
NW_011801243.1	819257	C	T	intron variant	LOC105203066	MODIFIER
NW_011801243.1	819310	T	C	intron variant	LOC105203066	MODIFIER
NW_011801243.1	821401	C	T	intron variant	LOC105203066	MODIFIER
NW_011801243.1	822900	T	C	intron variant	LOC105203066	MODIFIER
NW_011801243.1	825131	T	C	upstream gene variant	LOC105203059	MODIFIER
NW_011801243.1	829858	C	T	intron variant	LOC105203066	MODIFIER
NW_011801243.1	837522	G	A	intron variant	LOC105203066	MODIFIER
NW_011801243.1	840112	C	T	intron variant	LOC105203066	MODIFIER
NW_011801243.1	841789	T	C	intron variant	LOC105203066	MODIFIER
NW_011801243.1	845036	G	A	intron variant	LOC105203066	MODIFIER
NW_011801243.1	846051	A	G	intron variant	LOC105203066	MODIFIER
NW_011801243.1	847727	G	A	intron variant	LOC105203066	MODIFIER
NW_011801243.1	852423	C	T	upstream gene variant	LOC105203066	MODIFIER
NW_011801243.1	858890	C	A	intron variant	LOC105203059	MODIFIER
NW_011801243.1	859465	C	T	intron variant	LOC105203059	MODIFIER
NW_011801243.1	863906	T	G	intron variant	LOC105203059	MODIFIER
NW_011801243.1	864112	A	G	intron variant	LOC105203059	MODIFIER
NW_011801243.1	892257	G	T	upstream gene variant	LOC105203070	MODIFIER
NW_011801243.1	895891	T	A	downstream gene variant	LOC105203070	MODIFIER
NW_011801243.1	895922	A	T	downstream gene variant	LOC105203070	MODIFIER
NW_011801243.1	899984	C	T	upstream gene variant	LOC105203071	MODIFIER
NW_011801243.1	901129	G	C	upstream gene variant	LOC105203071	MODIFIER
NW_011801243.1	902818	G	A	upstream gene variant	LOC105203071	MODIFIER
NW_011801243.1	905544	C	A	missense variant	LOC105203072	MODERATE
NW_011801243.1	919671	C	T	intron variant	LOC105203073	MODIFIER
NW_011801243.1	920030	C	T	intron variant	LOC105203073	MODIFIER
NW_011801243.1	921524	G	A	intron variant	LOC105203073	MODIFIER
NW_011801243.1	936826	T	A	intron variant	LOC105203073	MODIFIER
NW_011801243.1	941426	C	A	intron variant	LOC105203073	MODIFIER
NW_011801243.1	947827	A	G	intron variant	LOC105203073	MODIFIER
NW_011801243.1	947834	G	A	intron variant	LOC105203073	MODIFIER
NW_011801243.1	947841	G	A	intron variant	LOC105203073	MODIFIER
NW_011801243.1	960986	G	T	intron variant	LOC105203073	MODIFIER
NW_011801243.1	968384	A	G	intron variant	LOC105203073	MODIFIER
NW_011801243.1	1009010	C	T	intron variant	LOC105203097	MODIFIER
NW_011801243.1	1013776	G	T	intron variant	LOC105203097	MODIFIER
NW_011801243.1	1022129	G	T	intron variant	LOC105203097	MODIFIER
NW_011801243.1	1022149	C	T	intron variant	LOC105203097	MODIFIER
NW_011801243.1	1024466	G	A	intron variant	LOC105203097	MODIFIER
NW_011801243.1	1030240	G	A	intron variant	LOC105203097	MODIFIER
NW_011801243.1	1047682	G	A	downstream gene variant	LOC105203074	MODIFIER
NW_011801243.1	1048525	G	A	downstream gene variant	LOC105203076	MODIFIER
NW_011801243.1	1058855	G	A	intron variant	LOC105203079	MODIFIER
NW_011801243.1	1058904	G	A	intron variant	LOC105203079	MODIFIER
NW_011801243.1	1070828	T	C	intron variant	LOC105203079	MODIFIER
NW_011801243.1	1070843	C	T	intron variant	LOC105203079	MODIFIER
NW_011801243.1	1070872	A	T	intron variant	LOC105203079	MODIFIER
NW_011801243.1	1071767	C	G	intron variant	LOC105203079	MODIFIER
NW_011801243.1	1072689	G	A	intron variant	LOC105203079	MODIFIER
NW_011801243.1	1072891	T	A	intron variant	LOC105203079	MODIFIER
NW_011801243.1	1082052	G	A	intron variant	LOC105203079	MODIFIER
NW_011801243.1	1082270	C	T	intron variant	LOC105203079	MODIFIER
NW_011801243.1	1088808	C	T	intron variant	LOC105203079	MODIFIER
NW_011801243.1	1091965	T	C	intron variant	LOC105203079	MODIFIER
NW_011801243.1	1095126	C	T	intron variant	LOC105203079	MODIFIER
NW_011801243.1	1096260	C	T	intron variant	LOC105203079	MODIFIER
NW_011801243.1	1099799	C	T	intron variant	LOC105203079	MODIFIER
NW_011801243.1	1101357	A	C	intron variant	LOC105203079	MODIFIER
NW_011801243.1	1106876	A	G	intron variant	LOC105203079	MODIFIER
NW_011801243.1	1107683	A	G	intron variant	LOC105203079	MODIFIER
NW_011801243.1	1108449	T	C	intron variant	LOC105203079	MODIFIER
NW_011801243.1	1110225	A	G	intron variant	LOC105203079	MODIFIER
NW_011801243.1	1119287	G	A	intron variant	LOC105203079	MODIFIER
NW_011801243.1	1119767	G	A	intron variant	LOC105203079	MODIFIER
NW_011801243.1	1128799	C	T	intron variant	LOC105203079	MODIFIER
NW_011801243.1	1128840	G	A	intron variant	LOC105203079	MODIFIER
NW_011801243.1	1130160	G	A	intron variant	LOC105203079	MODIFIER
NW_011801243.1	1132852	C	A	intron variant	LOC105203079	MODIFIER
NW_011801243.1	1133008	C	T	intron variant	LOC105203079	MODIFIER
NW_011801243.1	1133215	C	A	intron variant	LOC105203079	MODIFIER
NW_011801243.1	1135198	G	A	intron variant	LOC105203079	MODIFIER
NW_011801243.1	1136177	T	A	intron variant	LOC105203079	MODIFIER
NW_011801243.1	1136443	G	T	intron variant	LOC105203079	MODIFIER
NW_011801243.1	1138102	G	A	intron variant	LOC105203079	MODIFIER
NW_011801243.1	1140806	G	A	downstream gene variant	LOC105203078	MODIFIER
NW_011801243.1	1140921	C	T	downstream gene variant	LOC105203078	MODIFIER
NW_011801243.1	1142389	G	A	downstream gene variant	LOC105203078	MODIFIER
NW_011801243.1	1142425	A	C	downstream gene variant	LOC105203078	MODIFIER
NW_011801243.1	1142910	A	G	synonymous variant	LOC105203079	LOW
NW_011801243.1	1144584	G	A	downstream gene variant	LOC105203078	MODIFIER
NW_011801243.1	1144906	G	A	downstream gene variant	LOC105203078	MODIFIER
NW_011801243.1	1145516	A	G	downstream gene variant	LOC105203078	MODIFIER
NW_011801243.1	1151601	C	T	upstream gene variant	LOC105203078	MODIFIER
NW_011801243.1	1167127	G	A	intergenic region	LOC105203077-LOC105203080	MODIFIER
NW_011801243.1	1169356	T	C	intergenic region	LOC105203077-LOC105203080	MODIFIER
NW_011801243.1	1170013	C	T	intergenic region	LOC105203077-LOC105203080	MODIFIER
NW_011801243.1	1171310	G	A	downstream gene variant	LOC105203080	MODIFIER
NW_011801243.1	1171574	C	T	downstream gene variant	LOC105203080	MODIFIER
NW_011801243.1	1173113	A	G	downstream gene variant	LOC105203080	MODIFIER
NW_011801243.1	1173681	T	A	downstream gene variant	LOC105203080	MODIFIER
NW_011801243.1	1174388	G	A	downstream gene variant	LOC105203080	MODIFIER
NW_011801243.1	1177902	T	C	intron variant	LOC105203080	MODIFIER
NW_011801243.1	1177930	C	A	intron variant	LOC105203080	MODIFIER
NW_011801243.1	1180192	C	A	upstream gene variant	LOC105203080	MODIFIER
NW_011801243.1	1183950	A	G	upstream gene variant	LOC105203080	MODIFIER
NW_011801243.1	1185048	T	C	intron variant	LOC105203081	MODIFIER
NW_011801243.1	1186515	C	A	intron variant	LOC105203081	MODIFIER
NW_011801243.1	1186613	A	C	intron variant	LOC105203081	MODIFIER
NW_011801243.1	1186656	C	T	intron variant	LOC105203081	MODIFIER
NW_011801243.1	1200943	G	A	intron variant	LOC105203081	MODIFIER
NW_011801243.1	1201335	G	A	intron variant	LOC105203081	MODIFIER
NW_011801243.1	1206460	G	C	intron variant	LOC105203081	MODIFIER
NW_011801243.1	1213138	G	A	intron variant	LOC105203081	MODIFIER
NW_011801243.1	1213666	A	G	intron variant	LOC105203081	MODIFIER
NW_011801243.1	1228314	C	T	intron variant	LOC105203081	MODIFIER
NW_011801243.1	1234986	A	G	intron variant	LOC105203081	MODIFIER
NW_011801243.1	1235056	C	T	intron variant	LOC105203081	MODIFIER
NW_011801243.1	1236175	C	A	intron variant	LOC105203081	MODIFIER
NW_011801243.1	1236225	T	A	intron variant	LOC105203081	MODIFIER
NW_011801243.1	1238083	C	T	intron variant	LOC105203081	MODIFIER
NW_011801243.1	1238443	C	T	intron variant	LOC105203081	MODIFIER
NW_011801243.1	1267234	G	A	intron variant	LOC105203081	MODIFIER
NW_011801243.1	1276086	C	T	intron variant	LOC105203081	MODIFIER
NW_011801243.1	1277502	C	T	intron variant	LOC105203081	MODIFIER
NW_011801243.1	1281930	G	A	intron variant	LOC105203081	MODIFIER
NW_011801243.1	1283380	G	A	splice region variant&synonymous variant	LOC105203081	LOW
NW_011801243.1	1284443	C	T	intron variant	LOC105203081	MODIFIER
NW_011801243.1	1284570	A	C	intron variant	LOC105203081	MODIFIER
NW_011801243.1	1288886	C	T	3 prime UTR variant	LOC105203081	MODIFIER
NW_011801243.1	1294128	G	A	splice region variant&intron variant	LOC105203082	LOW
NW_011794409.1	4527	T	C	intergenic region	CHR_START-LOC105207370	MODIFIER
NW_011794409.1	8997	C	T	upstream gene variant	LOC105207370	MODIFIER
NW_011794409.1	16311	G	A	intron variant	LOC105207370	MODIFIER
NW_011794409.1	18418	T	G	intron variant	LOC105207370	MODIFIER
NW_011794409.1	18733	C	T	intron variant	LOC105207370	MODIFIER
NW_011794409.1	19042	C	T	intron variant	LOC105207370	MODIFIER
NW_011794409.1	25295	C	T	intron variant	LOC105207370	MODIFIER
NW_011794409.1	30742	G	A	intron variant	LOC105207370	MODIFIER
NW_011794409.1	33541	G	A	intron variant	LOC105207370	MODIFIER
NW_011794409.1	38140	A	G	intron variant	LOC105207370	MODIFIER
NW_011794409.1	41718	C	T	intron variant	LOC105207370	MODIFIER
NW_011794409.1	41818	A	G	intron variant	LOC105207370	MODIFIER
NW_011794409.1	41837	T	C	intron variant	LOC105207370	MODIFIER
NW_011794409.1	43856	C	T	intron variant	LOC105207370	MODIFIER
NW_011794409.1	45013	A	T	intron variant	LOC105207370	MODIFIER
NW_011794409.1	51607	G	A	intron variant	LOC105207370	MODIFIER
NW_011794409.1	51641	C	T	intron variant	LOC105207370	MODIFIER
NW_011794409.1	52507	C	T	intron variant	LOC105207370	MODIFIER
NW_011794409.1	53550	G	A	intron variant	LOC105207370	MODIFIER
NW_011794409.1	57938	G	A	intron variant	LOC105207370	MODIFIER
NW_011794409.1	59093	A	G	intron variant	LOC105207370	MODIFIER
NW_011794409.1	61132	C	T	intron variant	LOC105207370	MODIFIER
NW_011794409.1	64437	G	A	intron variant	LOC105207370	MODIFIER
NW_011794409.1	64976	G	A	intron variant	LOC105207370	MODIFIER
NW_011794409.1	65097	C	T	intron variant	LOC105207370	MODIFIER
NW_011794409.1	65183	G	A	intron variant	LOC105207370	MODIFIER
NW_011794409.1	68734	G	T	synonymous variant	LOC105207370	LOW
NW_011794409.1	71105	C	T	3 prime UTR variant	LOC105207370	MODIFIER
NW_011794409.1	73910	C	G	upstream gene variant	LOC105207387	MODIFIER
NW_011794409.1	76463	A	G	downstream gene variant	LOC105207370	MODIFIER
NW_011794409.1	78423	G	T	intron variant	LOC105207387	MODIFIER
NW_011794409.1	82105	C	T	intron variant	LOC105207387	MODIFIER
NW_011794409.1	84827	T	C	intron variant	LOC105207387	MODIFIER
NW_011794409.1	85489	T	C	intron variant	LOC105207387	MODIFIER
NW_011794409.1	85601	G	T	intron variant	LOC105207387	MODIFIER
NW_011794409.1	99290	G	A	downstream gene variant	LOC105207534	MODIFIER
NW_011794409.1	101044	G	T	missense variant	LOC105207534	MODERATE
NW_011794409.1	102294	C	T	missense variant	LOC105207534	MODERATE
NW_011794409.1	106302	A	C	upstream gene variant	LOC105207534	MODIFIER
NW_011794409.1	108891	C	T	intergenic region	LOC105207534-LOC105207396	MODIFIER
NW_011794409.1	109850	C	T	intergenic region	LOC105207534-LOC105207396	MODIFIER
NW_011794409.1	114668	A	G	intergenic region	LOC105207534-LOC105207396	MODIFIER
NW_011794409.1	114675	G	A	intergenic region	LOC105207534-LOC105207396	MODIFIER
NW_011794409.1	114696	G	A	intergenic region	LOC105207534-LOC105207396	MODIFIER
NW_011794409.1	119882	A	T	upstream gene variant	LOC105207396	MODIFIER
NW_011794409.1	120106	C	T	upstream gene variant	LOC105207396	MODIFIER
NW_011794409.1	120209	A	G	upstream gene variant	LOC105207396	MODIFIER
NW_011794409.1	120534	C	T	upstream gene variant	LOC105207396	MODIFIER
NW_011794409.1	120789	T	A	upstream gene variant	LOC105207396	MODIFIER
NW_011794409.1	122407	C	T	upstream gene variant	LOC105207396	MODIFIER
NW_011794409.1	122786	C	T	upstream gene variant	LOC105207396	MODIFIER
NW_011794409.1	123076	A	T	upstream gene variant	LOC105207396	MODIFIER
NW_011794409.1	123239	T	A	upstream gene variant	LOC105207396	MODIFIER
NW_011794409.1	124508	C	T	upstream gene variant	LOC105207402	MODIFIER
NW_011794409.1	125545	T	G	synonymous variant	LOC105207396	LOW
NW_011794409.1	127508	C	T	upstream gene variant	LOC105207402	MODIFIER
NW_011794409.1	133848	G	A	intron variant	LOC105207402	MODIFIER
NW_011794409.1	138354	T	C	downstream gene variant	LOC105207402	MODIFIER
NW_011794409.1	140496	G	A	missense variant	LOC105207412	MODERATE
NW_011794409.1	159511	C	T	intergenic region	LOC105207412-LOC105207423	MODIFIER
NW_011794409.1	161092	G	A	intergenic region	LOC105207412-LOC105207423	MODIFIER
NW_011794409.1	163674	C	T	downstream gene variant	LOC105207423	MODIFIER
NW_011794409.1	168269	G	A	intron variant	LOC105207423	MODIFIER
NW_011794409.1	168326	A	T	intron variant	LOC105207423	MODIFIER
NW_011794409.1	174352	A	T	intron variant	LOC105207423	MODIFIER
NW_011794409.1	175189	G	A	intron variant	LOC105207423	MODIFIER
NW_011794409.1	182515	T	A	intron variant	LOC105207423	MODIFIER
NW_011794409.1	183437	A	G	intron variant	LOC105207423	MODIFIER
NW_011794409.1	188797	G	A	intron variant	LOC105207423	MODIFIER
NW_011794409.1	194083	C	T	intron variant	LOC105207423	MODIFIER
NW_011794409.1	194329	G	T	intron variant	LOC105207423	MODIFIER
NW_011794409.1	194831	G	A	intron variant	LOC105207423	MODIFIER
NW_011794409.1	199549	C	T	intron variant	LOC105207423	MODIFIER
NW_011794409.1	215293	T	C	intron variant	LOC105207423	MODIFIER
NW_011794409.1	215450	G	T	intron variant	LOC105207423	MODIFIER
NW_011794409.1	215596	T	A	intron variant	LOC105207423	MODIFIER
NW_011794409.1	216060	C	T	intron variant	LOC105207423	MODIFIER
NW_011794409.1	225453	G	A	intron variant	LOC105207423	MODIFIER
NW_011794409.1	231112	T	A	intron variant	LOC105207423	MODIFIER
NW_011794409.1	242291	A	T	intron variant	LOC105207423	MODIFIER
NW_011794409.1	245421	T	G	intron variant	LOC105207423	MODIFIER
NW_011794409.1	246894	T	C	intron variant	LOC105207423	MODIFIER
NW_011794409.1	252601	A	G	intron variant	LOC105207423	MODIFIER
NW_011794409.1	252621	G	C	intron variant	LOC105207423	MODIFIER
NW_011794409.1	253099	C	T	intron variant	LOC105207423	MODIFIER
NW_011794409.1	258315	G	A	intron variant	LOC105207423	MODIFIER
NW_011794409.1	258333	C	T	intron variant	LOC105207423	MODIFIER
NW_011794409.1	265286	G	A	intron variant	LOC105207423	MODIFIER
NW_011794409.1	276192	G	A	intron variant	LOC105207423	MODIFIER
NW_011794409.1	278094	C	T	intron variant	LOC105207423	MODIFIER
NW_011794409.1	290771	A	G	intron variant	LOC105207423	MODIFIER
NW_011794409.1	291182	C	T	intron variant	LOC105207423	MODIFIER
NW_011794409.1	291419	A	G	intron variant	LOC105207423	MODIFIER
NW_011794409.1	292616	C	T	intron variant	LOC105207423	MODIFIER
NW_011794409.1	294631	C	T	intron variant	LOC105207423	MODIFIER
NW_011794409.1	294804	G	A	intron variant	LOC105207423	MODIFIER
NW_011794409.1	295119	C	T	synonymous variant	LOC105207423	LOW
NW_011794409.1	299198	C	T	intron variant	LOC105207423	MODIFIER
NW_011794409.1	299926	C	T	intron variant	LOC105207423	MODIFIER
NW_011794409.1	303929	G	A	intron variant	LOC105207423	MODIFIER
NW_011794409.1	313680	G	T	upstream gene variant	LOC105207423	MODIFIER
NW_011794409.1	421935	G	A	upstream gene variant	LOC105207481	MODIFIER
NW_011794409.1	423486	C	T	synonymous variant	LOC105207603	LOW
NW_011794409.1	423647	A	G	missense variant	LOC105207603	MODERATE
NW_011794634.1	1545	A	G	intergenic region	CHR_START-LOC105195673	MODIFIER
NW_011794634.1	1799	T	A	intergenic region	CHR_START-LOC105195673	MODIFIER
NW_011794634.1	1859	G	A	intergenic region	CHR_START-LOC105195673	MODIFIER
NW_011794634.1	10507	G	A	intergenic region	CHR_START-LOC105195673	MODIFIER
NW_011794634.1	11509	G	A	intergenic region	CHR_START-LOC105195673	MODIFIER
NW_011794634.1	16394	C	T	intergenic region	CHR_START-LOC105195673	MODIFIER
NW_011794634.1	28727	G	A	intergenic region	CHR_START-LOC105195673	MODIFIER
NW_011794634.1	35272	T	C	intergenic region	CHR_START-LOC105195673	MODIFIER
NW_011794634.1	35300	G	A	intergenic region	CHR_START-LOC105195673	MODIFIER
NW_011794634.1	35537	G	A	intergenic region	CHR_START-LOC105195673	MODIFIER
NW_011794634.1	36383	G	A	intergenic region	CHR_START-LOC105195673	MODIFIER
NW_011794634.1	37858	T	G	intergenic region	CHR_START-LOC105195673	MODIFIER
NW_011794634.1	39940	C	T	intergenic region	CHR_START-LOC105195673	MODIFIER
NW_011794634.1	41469	G	A	intergenic region	CHR_START-LOC105195673	MODIFIER
NW_011794634.1	41871	G	A	downstream gene variant	LOC105195673	MODIFIER
NW_011794634.1	42725	G	A	downstream gene variant	LOC105195673	MODIFIER
NW_011794634.1	49408	G	A	intron variant	LOC105195673	MODIFIER
NW_011794634.1	55040	T	C	intron variant	LOC105195673	MODIFIER
NW_011794634.1	58941	A	G	intron variant	LOC105195673	MODIFIER
NW_011794634.1	78185	T	C	intron variant	LOC105195673	MODIFIER
NW_011794634.1	78209	T	C	intron variant	LOC105195673	MODIFIER
NW_011794634.1	78267	A	G	intron variant	LOC105195673	MODIFIER
NW_011794634.1	84781	G	A	intron variant	LOC105195673	MODIFIER
NW_011794634.1	94367	G	A	intron variant	LOC105195673	MODIFIER
NW_011794634.1	94857	A	G	intron variant	LOC105195673	MODIFIER
NW_011794634.1	96080	T	C	intron variant	LOC105195673	MODIFIER
NW_011794634.1	99446	G	A	intron variant	LOC105195673	MODIFIER
NW_011794634.1	111483	G	A	intron variant	LOC105195673	MODIFIER
NW_011794634.1	115794	G	A	intron variant	LOC105195673	MODIFIER
NW_011794634.1	117090	G	A	intron variant	LOC105195673	MODIFIER
NW_011794634.1	117122	T	C	intron variant	LOC105195673	MODIFIER
NW_011794634.1	117536	T	A	intron variant	LOC105195673	MODIFIER
NW_011794634.1	118550	G	A	intron variant	LOC105195673	MODIFIER
NW_011794634.1	118571	G	A	intron variant	LOC105195673	MODIFIER
NW_011794634.1	132100	C	T	intron variant	LOC105195673	MODIFIER
NW_011794634.1	135641	G	A	intron variant	LOC105195673	MODIFIER
NW_011794634.1	140352	C	T	intron variant	LOC105195673	MODIFIER
NW_011794634.1	144696	G	A	intron variant	LOC105195673	MODIFIER
NW_011794634.1	145725	A	G	intron variant	LOC105195673	MODIFIER
NW_011794634.1	150615	A	G	intron variant	LOC105195673	MODIFIER
NW_011794634.1	150671	T	G	intron variant	LOC105195673	MODIFIER
NW_011794634.1	150698	C	T	intron variant	LOC105195673	MODIFIER
NW_011794634.1	152756	C	A	intron variant	LOC105195673	MODIFIER
NW_011794634.1	153499	G	A	intron variant	LOC105195673	MODIFIER
NW_011794634.1	155429	A	G	intron variant	LOC105195673	MODIFIER
NW_011794634.1	155472	A	G	intron variant	LOC105195673	MODIFIER
NW_011794634.1	156471	C	T	intron variant	LOC105195673	MODIFIER
NW_011794634.1	156635	C	T	intron variant	LOC105195673	MODIFIER
NW_011794634.1	157435	G	A	intron variant	LOC105195673	MODIFIER
NW_011794634.1	161400	T	C	intron variant	LOC105195673	MODIFIER
NW_011794634.1	163161	G	A	intron variant	LOC105195673	MODIFIER
NW_011794634.1	163537	G	A	intron variant	LOC105195673	MODIFIER
NW_011794634.1	164113	A	G	intron variant	LOC105195673	MODIFIER
NW_011794634.1	169084	A	C	intron variant	LOC105195673	MODIFIER
NW_011794634.1	169919	A	G	intron variant	LOC105195673	MODIFIER
NW_011794634.1	173050	G	C	intron variant	LOC105195673	MODIFIER
NW_011794634.1	173080	T	C	intron variant	LOC105195673	MODIFIER
NW_011794634.1	173360	A	C	intron variant	LOC105195673	MODIFIER
NW_011794634.1	179564	C	T	intron variant	LOC105195673	MODIFIER
NW_011794634.1	185793	G	A	intron variant	LOC105195673	MODIFIER
NW_011794634.1	186651	T	C	intron variant	LOC105195673	MODIFIER
NW_011794634.1	187111	A	G	intron variant	LOC105195673	MODIFIER
NW_011794634.1	187230	G	A	intron variant	LOC105195673	MODIFIER
NW_011794634.1	187807	A	G	intron variant	LOC105195673	MODIFIER
NW_011794634.1	187841	T	G	intron variant	LOC105195673	MODIFIER
NW_011794634.1	189057	A	G	intron variant	LOC105195673	MODIFIER
NW_011794634.1	190766	C	T	intron variant	LOC105195673	MODIFIER
NW_011794634.1	194472	G	T	intron variant	LOC105195673	MODIFIER
NW_011794634.1	194560	G	A	intron variant	LOC105195673	MODIFIER
NW_011794634.1	195445	C	T	intron variant	LOC105195673	MODIFIER
NW_011794634.1	196269	G	A	intron variant	LOC105195673	MODIFIER
NW_011794634.1	196427	G	A	intron variant	LOC105195673	MODIFIER
NW_011794634.1	204143	A	T	intron variant	LOC105195673	MODIFIER
NW_011794634.1	204687	C	T	intron variant	LOC105195673	MODIFIER
NW_011794634.1	204751	G	A	intron variant	LOC105195673	MODIFIER
NW_011794634.1	204797	G	A	intron variant	LOC105195673	MODIFIER
NW_011794634.1	204843	A	G	intron variant	LOC105195673	MODIFIER
NW_011794634.1	204972	G	A	intron variant	LOC105195673	MODIFIER
NW_011794634.1	206115	A	G	intron variant	LOC105195673	MODIFIER
NW_011794634.1	216477	G	A	intron variant	LOC105195673	MODIFIER
NW_011794634.1	216599	G	A	intron variant	LOC105195673	MODIFIER
NW_011794634.1	216960	G	A	intron variant	LOC105195673	MODIFIER
NW_011794634.1	217473	G	A	intron variant	LOC105195673	MODIFIER
NW_011794634.1	217505	A	G	intron variant	LOC105195673	MODIFIER
NW_011794634.1	219136	G	A	intron variant	LOC105195673	MODIFIER
NW_011794634.1	219708	C	T	intron variant	LOC105195673	MODIFIER
NW_011794634.1	219772	C	T	intron variant	LOC105195673	MODIFIER
NW_011794634.1	222036	C	T	intron variant	LOC105195673	MODIFIER
NW_011794634.1	222997	A	G	intron variant	LOC105195673	MODIFIER
NW_011794634.1	225017	G	A	intron variant	LOC105195673	MODIFIER
NW_011794634.1	225196	G	A	intron variant	LOC105195673	MODIFIER
NW_011794634.1	225459	G	A	intron variant	LOC105195673	MODIFIER
NW_011794634.1	225519	C	T	intron variant	LOC105195673	MODIFIER
NW_011794634.1	231768	T	C	upstream gene variant	LOC105195673	MODIFIER
NW_011794634.1	234593	G	T	intron variant	LOC105195681	MODIFIER
NW_011794634.1	235718	G	C	intron variant	LOC105195681	MODIFIER
NW_011794634.1	236203	C	A	intron variant	LOC105195681	MODIFIER
NW_011794634.1	236451	A	G	intron variant	LOC105195681	MODIFIER
NW_011794634.1	247533	A	G	intron variant	LOC105195681	MODIFIER
NW_011794634.1	247649	C	T	intron variant	LOC105195681	MODIFIER
NW_011794634.1	248412	G	A	intron variant	LOC105195681	MODIFIER
NW_011794634.1	248726	A	G	intron variant	LOC105195681	MODIFIER
NW_011794634.1	251620	C	T	upstream gene variant	LOC105195681	MODIFIER
NW_011794634.1	253402	T	G	upstream gene variant	LOC105195681	MODIFIER
NW_011794634.1	257246	A	G	intron variant	LOC105195681	MODIFIER
NW_011794634.1	258000	C	A	intron variant	LOC105195681	MODIFIER
NW_011794634.1	260521	G	A	intron variant	LOC105195681	MODIFIER
NW_011794634.1	262402	C	T	intron variant	LOC105195681	MODIFIER
NW_011794634.1	268496	T	A	3 prime UTR variant	LOC105195681	MODIFIER
NW_011794634.1	271740	A	G	synonymous variant	LOC105195701	LOW
NW_011794634.1	289574	C	T	intron variant	LOC105195710	MODIFIER
NW_011794634.1	301984	A	G	intron variant	LOC105195710	MODIFIER
NW_011794634.1	309890	A	G	upstream gene variant	LOC105195710	MODIFIER
NW_011794634.1	320619	T	G	intron variant	LOC105195710	MODIFIER
NW_011794634.1	320687	G	T	intron variant	LOC105195710	MODIFIER
NW_011794634.1	322089	G	T	intron variant	LOC105195710	MODIFIER
NW_011794634.1	322268	G	A	intron variant	LOC105195710	MODIFIER
NW_011794634.1	327130	T	C	intron variant	LOC105195710	MODIFIER
NW_011794634.1	334103	C	T	intron variant	LOC105195710	MODIFIER
NW_011794634.1	336574	G	A	intron variant	LOC105195710	MODIFIER
NW_011794634.1	338059	G	A	intron variant	LOC105195710	MODIFIER
NW_011794634.1	344412	G	A	intron variant	LOC105195710	MODIFIER
NW_011794634.1	352488	T	C	intron variant	LOC105195710	MODIFIER
NW_011794634.1	353745	T	C	intron variant	LOC105195710	MODIFIER
NW_011794634.1	354513	T	C	intron variant	LOC105195710	MODIFIER
NW_011794634.1	354800	G	A	intron variant	LOC105195710	MODIFIER
NW_011794634.1	354879	C	T	intron variant	LOC105195710	MODIFIER
NW_011794634.1	354928	C	T	intron variant	LOC105195710	MODIFIER
NW_011794634.1	355118	G	A	intron variant	LOC105195710	MODIFIER
NW_011794634.1	357935	A	G	intron variant	LOC105195710	MODIFIER
NW_011794634.1	359222	C	T	intron variant	LOC105195710	MODIFIER
NW_011794634.1	359674	C	T	intron variant	LOC105195710	MODIFIER
NW_011794634.1	365862	A	C	intron variant	LOC105195710	MODIFIER
NW_011794634.1	366505	G	A	intron variant	LOC105195710	MODIFIER
NW_011794634.1	370582	T	A	intron variant	LOC105195710	MODIFIER
NW_011794634.1	370641	G	T	intron variant	LOC105195710	MODIFIER
NW_011794634.1	370922	C	G	intron variant	LOC105195710	MODIFIER
NW_011794634.1	378896	G	A	intron variant	LOC105195710	MODIFIER
NW_011794634.1	394456	A	G	intron variant	LOC105195710	MODIFIER
NW_011794634.1	398409	C	T	intron variant	LOC105195710	MODIFIER
NW_011794634.1	398982	A	G	intron variant	LOC105195710	MODIFIER
NW_011794634.1	399281	T	A	intron variant	LOC105195710	MODIFIER
NW_011794634.1	399347	G	A	intron variant	LOC105195710	MODIFIER
NW_011794634.1	402597	A	G	3 prime UTR variant	LOC105195710	MODIFIER
NW_011794634.1	403293	A	G	3 prime UTR variant	LOC105195710	MODIFIER
NW_011794634.1	417321	A	G	upstream gene variant	LOC105195837	MODIFIER
NW_011794634.1	417328	T	C	upstream gene variant	LOC105195837	MODIFIER
NW_011794634.1	418155	C	T	upstream gene variant	LOC105195720	MODIFIER
NW_011794634.1	418762	A	T	upstream gene variant	LOC105195720	MODIFIER
NW_011794634.1	419268	T	C	upstream gene variant	LOC105195720	MODIFIER
NW_011794634.1	423274	C	T	downstream gene variant	LOC105195837	MODIFIER
NW_011794634.1	428605	T	G	upstream gene variant	LOC105195845	MODIFIER
NW_011794634.1	429556	C	T	upstream gene variant	LOC105195845	MODIFIER
NW_011794634.1	434866	A	G	synonymous variant	LOC105195733	LOW
NW_011794634.1	437143	C	T	upstream gene variant	LOC105192747-1	MODIFIER
NW_011794634.1	468107	A	G	upstream gene variant	LOC105195781	MODIFIER
NW_011794634.1	470715	A	G	upstream gene variant	LOC105195772	MODIFIER
NW_011794634.1	471096	A	G	upstream gene variant	LOC105195772	MODIFIER
NW_011794634.1	471213	C	T	upstream gene variant	LOC105195772	MODIFIER
NW_011794634.1	472261	T	C	upstream gene variant	LOC105195772	MODIFIER
NW_011794634.1	479930	C	T	upstream gene variant	LOC105195766	MODIFIER
NW_011794634.1	482335	C	T	upstream gene variant	LOC105195750	MODIFIER
NW_011794634.1	483323	T	C	upstream gene variant	LOC105195750	MODIFIER
NW_011794634.1	483770	C	T	upstream gene variant	LOC105195750	MODIFIER
NW_011794634.1	484226	G	C	upstream gene variant	LOC105195750	MODIFIER
NW_011794634.1	484304	G	A	upstream gene variant	LOC105195750	MODIFIER
NW_011794634.1	495184	C	T	synonymous variant	LOC105195789	LOW
NW_011794634.1	503603	C	T	intron variant	LOC105195797	MODIFIER
NW_011794634.1	503640	C	T	intron variant	LOC105195797	MODIFIER
NW_011794634.1	503669	A	C	intron variant	LOC105195797	MODIFIER
NW_011795711.1	18017	T	C	intergenic region	LOC105193138-LOC105193110	MODIFIER
NW_011795711.1	18358	T	C	intergenic region	LOC105193138-LOC105193110	MODIFIER
NW_011795711.1	18360	C	T	intergenic region	LOC105193138-LOC105193110	MODIFIER
NW_011795711.1	19418	A	G	intergenic region	LOC105193138-LOC105193110	MODIFIER
NW_011795711.1	19458	A	G	intergenic region	LOC105193138-LOC105193110	MODIFIER
NW_011795711.1	21218	A	T	intergenic region	LOC105193138-LOC105193110	MODIFIER
NW_011795711.1	28963	G	A	upstream gene variant	LOC105193113	MODIFIER
NW_011795711.1	40547	C	T	synonymous variant	LOC105193114	LOW
NW_011795711.1	43222	G	A	upstream gene variant	LOC105193111	MODIFIER
NW_011795711.1	46825	G	A	3 prime UTR variant	LOC105193116	MODIFIER
NW_011795711.1	60599	C	A	downstream gene variant	LOC105193118	MODIFIER
NW_011795711.1	61998	G	A	downstream gene variant	LOC105193119	MODIFIER
NW_011795711.1	66386	C	T	5 prime UTR variant	LOC105193119	MODIFIER
NW_011795711.1	77931	G	T	downstream gene variant	LOC105193121	MODIFIER
NW_011795711.1	78001	C	T	downstream gene variant	LOC105193121	MODIFIER
NW_011795711.1	93263	C	T	intron variant	LOC105193139	MODIFIER
NW_011795711.1	95253	T	C	downstream gene variant	LOC105193122	MODIFIER
NW_011795711.1	95307	T	C	downstream gene variant	LOC105193122	MODIFIER
NW_011795711.1	98264	C	T	3 prime UTR variant	LOC105193139	MODIFIER
NW_011795711.1	101171	G	A	upstream gene variant	LOC105193122	MODIFIER
NW_011795711.1	125907	C	T	splice region variant&intron variant	LOC105193141	LOW
NW_011795711.1	134519	C	T	upstream gene variant	LOC105193142	MODIFIER
NW_011795711.1	135720	G	A	upstream gene variant	LOC105193142	MODIFIER
NW_011795711.1	136360	A	T	intron variant	LOC105193142	MODIFIER
NW_011795711.1	142528	T	C	intron variant	LOC105193142	MODIFIER
NW_011795711.1	142543	C	T	intron variant	LOC105193142	MODIFIER
NW_011795711.1	145783	A	T	intron variant	LOC105193142	MODIFIER
NW_011795711.1	145792	C	T	intron variant	LOC105193142	MODIFIER
NW_011795711.1	145863	A	G	intron variant	LOC105193142	MODIFIER
NW_011795711.1	148594	C	T	intron variant	LOC105193142	MODIFIER
NW_011795711.1	150474	C	T	intron variant	LOC105193142	MODIFIER
NW_011795711.1	152718	A	T	intron variant	LOC105193142	MODIFIER
NW_011795711.1	173208	C	T	intron variant	LOC105193142	MODIFIER
NW_011795711.1	180777	T	A	downstream gene variant	LOC105193142	MODIFIER
NW_011795711.1	183156	T	C	upstream gene variant	LOC105193123	MODIFIER
NW_011795711.1	184925	G	A	upstream gene variant	LOC105193123	MODIFIER
NW_011795711.1	184980	C	T	upstream gene variant	LOC105193123	MODIFIER
NW_011795711.1	194374	T	C	downstream gene variant	LOC105193126	MODIFIER
NW_011795711.1	195497	G	A	3 prime UTR variant	LOC105193126	MODIFIER
NW_011795711.1	196164	G	A	missense variant	LOC105193126	MODERATE
NW_011795711.1	231481	A	G	upstream gene variant	LOC105193144	MODIFIER
NW_011795711.1	246445	C	T	upstream gene variant	LOC105193145	MODIFIER
NW_011795711.1	253864	G	A	upstream gene variant	LOC105193127	MODIFIER
NW_011795711.1	260131	C	T	downstream gene variant	LOC105193127	MODIFIER
NW_011795711.1	270888	G	A	intron variant	LOC105193131	MODIFIER
NW_011795711.1	274014	A	C	intron variant	LOC105193131	MODIFIER
NW_011795711.1	275527	C	T	intron variant	LOC105193131	MODIFIER
NW_011795711.1	282174	C	A	intron variant	LOC105193131	MODIFIER
NW_011795711.1	283329	G	A	intron variant	LOC105193131	MODIFIER
NW_011795711.1	285435	T	A	intron variant	LOC105193131	MODIFIER
NW_011795711.1	291548	G	A	3 prime UTR variant	LOC105193132	MODIFIER
NW_011795711.1	295035	G	T	intron variant	LOC105193132	MODIFIER
NW_011795711.1	295062	C	T	intron variant	LOC105193132	MODIFIER
NW_011795711.1	295382	A	C	intron variant	LOC105193132	MODIFIER
NW_011795711.1	296810	A	G	synonymous variant	LOC105193132	LOW
NW_011795711.1	297700	A	T	intron variant	LOC105193132	MODIFIER
NW_011795711.1	298288	A	G	intron variant	LOC105193132	MODIFIER
NW_011795711.1	298630	G	A	intron variant	LOC105193132	MODIFIER
NW_011795711.1	315292	T	C	5 prime UTR variant	LOC105193135	MODIFIER
NW_011795711.1	316822	G	T	downstream gene variant	LOC105193134	MODIFIER
NW_011795711.1	317995	C	A	3 prime UTR variant	LOC105193134	MODIFIER
NW_011795711.1	318524	T	C	intron variant	LOC105193135	MODIFIER
NW_011795711.1	319361	C	T	missense variant	LOC105193134	MODERATE
NW_011795711.1	327910	G	A	intron variant	LOC105193135	MODIFIER
NW_011795711.1	329417	G	A	intron variant	LOC105193135	MODIFIER
NW_011795711.1	336280	G	A	upstream gene variant	LOC105193134	MODIFIER
NW_011795711.1	337146	G	A	synonymous variant	LOC105193135	LOW
NW_011795711.1	368762	A	T	intron variant	LOC105193137	MODIFIER
NW_011795711.1	395036	G	C	intron variant	LOC105193137	MODIFIER
NW_011795711.1	395317	A	G	intron variant	LOC105193137	MODIFIER
NW_011795711.1	395325	A	G	intron variant	LOC105193137	MODIFIER
NW_011795711.1	404347	G	A	intron variant	LOC105193137	MODIFIER
NW_011795711.1	413736	C	T	intron variant	LOC105193137	MODIFIER
NW_011795711.1	437603	C	T	intergenic region	LOC105193137-LOC105193136	MODIFIER
NW_011795711.1	438794	G	A	intergenic region	LOC105193137-LOC105193136	MODIFIER
NW_011795711.1	440919	G	A	intergenic region	LOC105193137-LOC105193136	MODIFIER
NW_011795711.1	441072	C	T	intergenic region	LOC105193137-LOC105193136	MODIFIER
NW_011795711.1	443508	C	T	intergenic region	LOC105193137-LOC105193136	MODIFIER
NW_011795711.1	444048	A	G	intergenic region	LOC105193137-LOC105193136	MODIFIER
NW_011795711.1	459042	A	G	intron variant	LOC105193136	MODIFIER
NW_011795711.1	464293	A	G	intron variant	LOC105193136	MODIFIER
NW_011795711.1	477729	T	A	intron variant	LOC105193136	MODIFIER
NW_011795711.1	490669	C	T	intergenic region	LOC105193136-CHR_END	MODIFIER
NW_011795711.1	491611	A	T	intergenic region	LOC105193136-CHR_END	MODIFIER
NW_011797558.1	47535	C	T	downstream gene variant	LOC105196902	MODIFIER
NW_011797558.1	54120	G	T	upstream gene variant	LOC105196902	MODIFIER
NW_011797558.1	57690	G	A	missense variant	LOC105196903	MODERATE
NW_011797558.1	69350	C	T	intron variant	LOC105196908	MODIFIER
NW_011797558.1	69538	A	G	intron variant	LOC105196908	MODIFIER
NW_011797558.1	69568	G	A	intron variant	LOC105196908	MODIFIER
NW_011797558.1	74291	T	A	intron variant	LOC105196908	MODIFIER
NW_011797558.1	76288	T	C	intron variant	LOC105196908	MODIFIER
NW_011797558.1	81416	T	C	intron variant	LOC105196908	MODIFIER
NW_011797558.1	81535	C	T	intron variant	LOC105196908	MODIFIER
NW_011797558.1	81600	C	A	intron variant	LOC105196908	MODIFIER
NW_011797558.1	81683	G	A	intron variant	LOC105196908	MODIFIER
NW_011797558.1	81702	C	T	intron variant	LOC105196908	MODIFIER
NW_011797558.1	81900	C	T	intron variant	LOC105196908	MODIFIER
NW_011797558.1	82194	T	C	intron variant	LOC105196908	MODIFIER
NW_011797558.1	82234	A	G	intron variant	LOC105196908	MODIFIER
NW_011797558.1	93638	G	C	intron variant	LOC105196908	MODIFIER
NW_011797558.1	93687	G	A	intron variant	LOC105196908	MODIFIER
NW_011797558.1	100582	C	T	intron variant	LOC105196908	MODIFIER
NW_011797558.1	100711	A	G	intron variant	LOC105196908	MODIFIER
NW_011797558.1	103042	G	A	intron variant	LOC105196908	MODIFIER
NW_011797558.1	103226	A	G	intron variant	LOC105196908	MODIFIER
NW_011797558.1	109035	G	A	intron variant	LOC105196908	MODIFIER
NW_011797558.1	120661	C	T	intron variant	LOC105196908	MODIFIER
NW_011797558.1	120874	C	T	intron variant	LOC105196908	MODIFIER
NW_011797558.1	122628	T	C	intron variant	LOC105196908	MODIFIER
NW_011797558.1	125084	C	T	intron variant	LOC105196908	MODIFIER
NW_011797558.1	132948	C	T	intron variant	LOC105196908	MODIFIER
NW_011797558.1	132995	G	A	intron variant	LOC105196908	MODIFIER
NW_011797558.1	133000	T	A	intron variant	LOC105196908	MODIFIER
NW_011797558.1	138994	T	C	intron variant	LOC105196908	MODIFIER
NW_011797558.1	161332	C	T	intron variant	LOC105196908	MODIFIER
NW_011797558.1	164815	A	T	intron variant	LOC105196908	MODIFIER
NW_011797558.1	182130	C	T	intron variant	LOC105196908	MODIFIER
NW_011797558.1	182288	A	G	intron variant	LOC105196908	MODIFIER
NW_011797558.1	189409	G	A	intron variant	LOC105196908	MODIFIER
NW_011797558.1	192013	T	C	intron variant	LOC105196908	MODIFIER
NW_011797558.1	193817	G	A	intron variant	LOC105196908	MODIFIER
NW_011797558.1	205512	G	A	intron variant	LOC105196908	MODIFIER
NW_011797558.1	208690	G	T	intron variant	LOC105196908	MODIFIER
NW_011797558.1	211009	C	T	intron variant	LOC105196908	MODIFIER
NW_011797558.1	221058	T	A	upstream gene variant	LOC105196904	MODIFIER
NW_011797558.1	221238	G	A	upstream gene variant	LOC105196904	MODIFIER
NW_011797558.1	227837	G	A	intron variant	LOC105196908	MODIFIER
NW_011797558.1	231866	C	T	intron variant	LOC105196908	MODIFIER
NW_011797558.1	236606	G	A	intron variant	LOC105196908	MODIFIER
NW_011797558.1	241104	C	T	upstream gene variant	LOC105196904	MODIFIER
NW_011797558.1	241994	C	T	upstream gene variant	LOC105196904	MODIFIER
NW_011797558.1	253325	A	G	intron variant	LOC105196908	MODIFIER
NW_011797558.1	270225	A	G	intron variant	LOC105196908	MODIFIER
NW_011797558.1	270269	G	A	intron variant	LOC105196908	MODIFIER
NW_011797558.1	270299	C	T	intron variant	LOC105196908	MODIFIER
NW_011797558.1	270396	A	G	intron variant	LOC105196908	MODIFIER
NW_011797558.1	283813	G	A	intron variant	LOC105196908	MODIFIER
NW_011797558.1	290466	G	T	intron variant	LOC105196908	MODIFIER
NW_011797558.1	290475	A	T	intron variant	LOC105196908	MODIFIER
NW_011797558.1	290506	C	T	intron variant	LOC105196908	MODIFIER
NW_011797558.1	336275	A	G	5 prime UTR variant	LOC105196907	MODIFIER
NW_011797558.1	339197	G	T	upstream gene variant	LOC105196907	MODIFIER
NW_011794567.1	11456	C	T	upstream gene variant	LOC105194381	MODIFIER
NW_011794567.1	11794	G	C	upstream gene variant	LOC105194381	MODIFIER
NW_011794567.1	21451	G	A	upstream gene variant	LOC105194416	MODIFIER
NW_011794567.1	21774	G	A	synonymous variant	LOC105194381	LOW
NW_011794567.1	22118	G	A	upstream gene variant	LOC105194416	MODIFIER
NW_011794567.1	22986	C	T	upstream gene variant	LOC105194416	MODIFIER
NW_011794567.1	23011	T	C	5 prime UTR variant	LOC105194425	MODIFIER
NW_011794567.1	23119	A	T	missense variant	LOC105194425	MODERATE
NW_011794567.1	23367	G	A	upstream gene variant	LOC105194416	MODIFIER
NW_011794567.1	23433	T	C	upstream gene variant	LOC105194416	MODIFIER
NW_011794567.1	23487	A	G	upstream gene variant	LOC105194416	MODIFIER
NW_011794567.1	23562	G	A	upstream gene variant	LOC105194416	MODIFIER
NW_011794567.1	54948	A	C	splice region variant&intron variant	LOC105194434	LOW
NW_011794567.1	58992	G	A	missense variant	LOC105194453	MODERATE
NW_011794567.1	59256	C	T	missense variant	LOC105194453	MODERATE
NW_011794567.1	59266	C	G	synonymous variant	LOC105194453	LOW
NW_011794567.1	59731	C	T	upstream gene variant	LOC105194461	MODIFIER
NW_011794567.1	71822	T	A	intron variant	LOC105194469	MODIFIER
NW_011794567.1	73894	T	A	intron variant	LOC105194469	MODIFIER
NW_011794567.1	73914	C	T	intron variant	LOC105194469	MODIFIER
NW_011794567.1	73937	T	C	intron variant	LOC105194469	MODIFIER
NW_011794567.1	75502	C	G	intron variant	LOC105194469	MODIFIER
NW_011794567.1	77373	A	G	intron variant	LOC105194469	MODIFIER
NW_011794567.1	78528	C	T	intron variant	LOC105194469	MODIFIER
NW_011794567.1	80338	C	T	intron variant	LOC105194469	MODIFIER
NW_011794567.1	80851	T	A	intron variant	LOC105194469	MODIFIER
NW_011794567.1	80878	C	T	intron variant	LOC105194469	MODIFIER
NW_011794567.1	81402	C	T	intron variant	LOC105194469	MODIFIER
NW_011794567.1	82583	T	C	intron variant	LOC105194469	MODIFIER
NW_011794567.1	83043	T	C	intron variant	LOC105194469	MODIFIER
NW_011794567.1	86175	A	G	intron variant	LOC105194469	MODIFIER
NW_011794567.1	86427	A	C	intron variant	LOC105194469	MODIFIER
NW_011794567.1	87063	T	C	intron variant	LOC105194469	MODIFIER
NW_011794567.1	87711	C	T	intron variant	LOC105194469	MODIFIER
NW_011794567.1	88328	C	G	intron variant	LOC105194469	MODIFIER
NW_011794567.1	88545	G	A	intron variant	LOC105194469	MODIFIER
NW_011794567.1	89373	T	C	intron variant	LOC105194469	MODIFIER
NW_011794567.1	90472	C	T	intron variant	LOC105194469	MODIFIER
NW_011794567.1	90569	T	A	intron variant	LOC105194469	MODIFIER
NW_011794567.1	90669	C	T	intron variant	LOC105194469	MODIFIER
NW_011794567.1	94272	C	T	intron variant	LOC105194469	MODIFIER
NW_011794567.1	98638	G	C	upstream gene variant	LOC105194469	MODIFIER
NW_011794567.1	99551	C	T	upstream gene variant	LOC105194469	MODIFIER
NW_011794567.1	99607	C	T	upstream gene variant	LOC105194469	MODIFIER
NW_011794567.1	105177	G	A	intron variant	LOC105194469	MODIFIER
NW_011794567.1	105729	G	A	intron variant	LOC105194469	MODIFIER
NW_011794567.1	109395	T	A	missense variant	LOC105194469	MODERATE
NW_011794567.1	109506	A	G	intron variant	LOC105194469	MODIFIER
NW_011794567.1	109987	T	A	intron variant	LOC105194469	MODIFIER
NW_011794567.1	112063	G	T	intron variant	LOC105194469	MODIFIER
NW_011794567.1	112409	A	G	intron variant	LOC105194469	MODIFIER
NW_011794567.1	114322	C	T	downstream gene variant	LOC105194469	MODIFIER
NW_011794567.1	116467	T	A	downstream gene variant	LOC105194469	MODIFIER
NW_011794567.1	116486	C	T	downstream gene variant	LOC105194469	MODIFIER
NW_011794567.1	117185	T	C	downstream gene variant	LOC105194469	MODIFIER
NW_011794567.1	117323	C	T	downstream gene variant	LOC105194469	MODIFIER
NW_011794567.1	117514	T	C	downstream gene variant	LOC105194469	MODIFIER
NW_011794567.1	118241	C	T	missense variant	LOC105194481	MODERATE
NW_011794567.1	118569	C	T	missense variant	LOC105194481	MODERATE
NW_011794567.1	119516	T	C	missense variant	LOC105194481	MODERATE
NW_011794567.1	119525	C	T	missense variant	LOC105194481	MODERATE
NW_011794567.1	119936	T	C	5 prime UTR premature start codon gain variant	LOC105194481	LOW
NW_011794567.1	123042	T	C	upstream gene variant	LOC105194481	MODIFIER
NW_011794567.1	123078	T	C	upstream gene variant	LOC105194481	MODIFIER
NW_011794567.1	123140	C	T	upstream gene variant	LOC105194481	MODIFIER
NW_011794567.1	123240	A	G	upstream gene variant	LOC105194481	MODIFIER
NW_011794567.1	123248	T	C	upstream gene variant	LOC105194481	MODIFIER
NW_011794567.1	123309	C	T	upstream gene variant	LOC105194481	MODIFIER
NW_011794567.1	123914	C	T	upstream gene variant	LOC105194481	MODIFIER
NW_011794567.1	124332	A	G	upstream gene variant	LOC105194481	MODIFIER
NW_011794567.1	130764	C	T	upstream gene variant	LOC105194487	MODIFIER
NW_011794567.1	130862	G	A	upstream gene variant	LOC105194487	MODIFIER
NW_011794567.1	130897	C	T	upstream gene variant	LOC105194487	MODIFIER
NW_011794567.1	131228	A	T	upstream gene variant	LOC105194487	MODIFIER
NW_011794567.1	131316	A	G	upstream gene variant	LOC105194487	MODIFIER
NW_011794567.1	131568	T	C	upstream gene variant	LOC105194487	MODIFIER
NW_011794567.1	131722	A	G	upstream gene variant	LOC105194487	MODIFIER
NW_011794567.1	131833	T	C	upstream gene variant	LOC105194495	MODIFIER
NW_011794567.1	132179	A	G	upstream gene variant	LOC105194495	MODIFIER
NW_011794567.1	142566	G	C	downstream gene variant	LOC105194510	MODIFIER
NW_011794567.1	142752	A	G	5 prime UTR variant	LOC105194845	MODIFIER
NW_011794567.1	142967	A	G	upstream gene variant	LOC105194845	MODIFIER
NW_011794567.1	143005	A	T	upstream gene variant	LOC105194845	MODIFIER
NW_011794567.1	144471	C	T	upstream gene variant	LOC105194845	MODIFIER
NW_011794567.1	145617	T	C	upstream gene variant	LOC105194845	MODIFIER
NW_011794567.1	145679	A	G	upstream gene variant	LOC105194845	MODIFIER
NW_011794567.1	145727	T	C	upstream gene variant	LOC105194845	MODIFIER
NW_011794567.1	146210	G	A	upstream gene variant	LOC105194845	MODIFIER
NW_011794567.1	146349	A	C	upstream gene variant	LOC105194845	MODIFIER
NW_011794567.1	146380	G	A	upstream gene variant	LOC105194845	MODIFIER
NW_011794567.1	147403	A	T	3 prime UTR variant	LOC105194510	MODIFIER
NW_011794567.1	155761	C	T	intron variant	LOC105194510	MODIFIER
NW_011794567.1	156990	C	T	intron variant	LOC105194510	MODIFIER
NW_011794567.1	158549	C	T	intron variant	LOC105194510	MODIFIER
NW_011794567.1	162786	G	A	intron variant	LOC105194510	MODIFIER
NW_011794567.1	162810	T	C	intron variant	LOC105194510	MODIFIER
NW_011794567.1	162874	G	A	intron variant	LOC105194510	MODIFIER
NW_011794567.1	162917	A	G	intron variant	LOC105194510	MODIFIER
NW_011794567.1	163178	A	G	intron variant	LOC105194510	MODIFIER
NW_011794567.1	163874	G	A	intron variant	LOC105194510	MODIFIER
NW_011794567.1	163906	T	A	intron variant	LOC105194510	MODIFIER
NW_011794567.1	167517	G	A	intron variant	LOC105194510	MODIFIER
NW_011794567.1	173537	T	C	intron variant	LOC105194510	MODIFIER
NW_011794567.1	173565	G	A	intron variant	LOC105194510	MODIFIER
NW_011794567.1	179447	C	G	intron variant	LOC105194510	MODIFIER
NW_011794567.1	179461	G	C	intron variant	LOC105194510	MODIFIER
NW_011794567.1	183260	T	A	intron variant	LOC105194510	MODIFIER
NW_011794567.1	186596	A	C	intron variant	LOC105194510	MODIFIER
NW_011794567.1	188370	G	A	intron variant	LOC105194510	MODIFIER
NW_011794567.1	192578	A	G	intron variant	LOC105194510	MODIFIER
NW_011794567.1	192607	T	C	intron variant	LOC105194510	MODIFIER
NW_011794567.1	194696	C	A	intron variant	LOC105194510	MODIFIER
NW_011794567.1	194838	T	C	intron variant	LOC105194510	MODIFIER
NW_011794567.1	212772	A	G	intron variant	LOC105194510	MODIFIER
NW_011794567.1	212931	A	G	intron variant	LOC105194510	MODIFIER
NW_011794567.1	213049	T	C	intron variant	LOC105194510	MODIFIER
NW_011794567.1	216089	G	A	intron variant	LOC105194510	MODIFIER
NW_011794567.1	222474	C	T	intron variant	LOC105194510	MODIFIER
NW_011794567.1	223908	C	T	intron variant	LOC105194510	MODIFIER
NW_011794567.1	224656	C	A	intron variant	LOC105194510	MODIFIER
NW_011794567.1	228454	C	T	intron variant	LOC105194510	MODIFIER
NW_011794567.1	228614	T	C	intron variant	LOC105194510	MODIFIER
NW_011794567.1	230152	G	A	intron variant	LOC105194510	MODIFIER
NW_011794567.1	230196	A	G	intron variant	LOC105194510	MODIFIER
NW_011794567.1	230527	C	T	intron variant	LOC105194510	MODIFIER
NW_011794567.1	232899	G	A	intron variant	LOC105194510	MODIFIER
NW_011794567.1	232963	C	T	intron variant	LOC105194510	MODIFIER
NW_011794567.1	232996	G	A	intron variant	LOC105194510	MODIFIER
NW_011794567.1	240230	G	C	intron variant	LOC105194510	MODIFIER
NW_011794567.1	243662	G	A	intron variant	LOC105194510	MODIFIER
NW_011794567.1	247558	G	A	intron variant	LOC105194510	MODIFIER
NW_011794567.1	247730	G	T	intron variant	LOC105194510	MODIFIER
NW_011794567.1	259271	G	A	intron variant	LOC105194510	MODIFIER
NW_011794567.1	259459	C	A	intron variant	LOC105194510	MODIFIER
NW_011794567.1	261332	G	A	intron variant	LOC105194510	MODIFIER
NW_011794567.1	261601	C	A	intron variant	LOC105194510	MODIFIER
NW_011794567.1	262466	C	G	intron variant	LOC105194510	MODIFIER
NW_011794567.1	273383	C	G	intron variant	LOC105194510	MODIFIER
NW_011794567.1	273399	A	G	intron variant	LOC105194510	MODIFIER
NW_011794567.1	280349	A	G	intron variant	LOC105194510	MODIFIER
NW_011794567.1	283283	T	C	intron variant	LOC105194510	MODIFIER
NW_011794567.1	290706	C	T	intron variant	LOC105194510	MODIFIER
NW_011794567.1	292297	C	T	intron variant	LOC105194510	MODIFIER
NW_011794567.1	297252	G	A	intron variant	LOC105194510	MODIFIER
NW_011794567.1	298254	C	T	intron variant	LOC105194510	MODIFIER
NW_011794567.1	298326	C	T	intron variant	LOC105194510	MODIFIER
NW_011794567.1	300046	G	A	intron variant	LOC105194510	MODIFIER
NW_011794567.1	305449	G	A	intron variant	LOC105194510	MODIFIER
NW_011794567.1	305484	G	A	intron variant	LOC105194510	MODIFIER
NW_011794567.1	310558	A	G	intron variant	LOC105194510	MODIFIER
NW_011794567.1	310595	C	A	intron variant	LOC105194510	MODIFIER
NW_011794567.1	315078	T	A	intron variant	LOC105194510	MODIFIER
NW_011794567.1	315426	T	A	intron variant	LOC105194510	MODIFIER
NW_011794567.1	315524	C	A	intron variant	LOC105194510	MODIFIER
NW_011794567.1	315830	C	T	intron variant	LOC105194510	MODIFIER
NW_011794567.1	317306	A	G	intron variant	LOC105194510	MODIFIER
NW_011794567.1	327709	G	A	intron variant	LOC105194510	MODIFIER
NW_011794567.1	327829	G	C	intron variant	LOC105194510	MODIFIER
NW_011794567.1	331230	A	G	intron variant	LOC105194510	MODIFIER
NW_011794567.1	334625	T	C	intron variant	LOC105194510	MODIFIER
NW_011794567.1	340106	T	C	intron variant	LOC105194510	MODIFIER
NW_011794567.1	340852	T	C	intron variant	LOC105194510	MODIFIER
NW_011794567.1	342695	A	G	intron variant	LOC105194510	MODIFIER
NW_011794567.1	345984	G	A	intron variant	LOC105194510	MODIFIER
NW_011794567.1	346129	C	T	intron variant	LOC105194510	MODIFIER
NW_011794567.1	352524	G	A	intron variant	LOC105194510	MODIFIER
NW_011794567.1	355716	A	G	intron variant	LOC105194510	MODIFIER
NW_011794567.1	358667	C	G	intron variant	LOC105194510	MODIFIER
NW_011794567.1	359068	G	A	intron variant	LOC105194510	MODIFIER
NW_011794567.1	361340	A	G	intron variant	LOC105194510	MODIFIER
NW_011794567.1	369537	T	A	intron variant	LOC105194510	MODIFIER
NW_011794567.1	379476	A	G	intron variant	LOC105194510	MODIFIER
NW_011794567.1	387030	G	T	intron variant	LOC105194510	MODIFIER
NW_011794567.1	392359	A	G	intron variant	LOC105194510	MODIFIER
NW_011794567.1	400022	C	T	intron variant	LOC105194510	MODIFIER
NW_011794567.1	400072	G	C	intron variant	LOC105194510	MODIFIER
NW_011794567.1	421816	G	A	intron variant	LOC105194510	MODIFIER
NW_011794567.1	423384	C	T	intron variant	LOC105194510	MODIFIER
NW_011794567.1	432506	G	A	intron variant	LOC105194510	MODIFIER
NW_011794567.1	433733	T	C	intron variant	LOC105194510	MODIFIER
NW_011794567.1	433971	C	T	intron variant	LOC105194510	MODIFIER
NW_011794567.1	440014	G	A	intron variant	LOC105194510	MODIFIER
NW_011794567.1	442006	C	A	intron variant	LOC105194510	MODIFIER
NW_011794567.1	442168	C	T	intron variant	LOC105194510	MODIFIER
NW_011794567.1	442186	G	A	intron variant	LOC105194510	MODIFIER
NW_011794567.1	442966	A	C	intron variant	LOC105194510	MODIFIER
NW_011794567.1	444866	T	G	intron variant	LOC105194510	MODIFIER
NW_011794567.1	445018	C	T	intron variant	LOC105194510	MODIFIER
NW_011794567.1	446018	C	G	intron variant	LOC105194510	MODIFIER
NW_011794567.1	448910	C	T	intron variant	LOC105194510	MODIFIER
NW_011794567.1	449129	A	G	intron variant	LOC105194510	MODIFIER
NW_011794567.1	449178	A	G	intron variant	LOC105194510	MODIFIER
NW_011794567.1	450190	G	C	intron variant	LOC105194510	MODIFIER
NW_011794567.1	450449	T	G	intron variant	LOC105194510	MODIFIER
NW_011794567.1	452432	G	A	intron variant	LOC105194510	MODIFIER
NW_011794567.1	452449	G	A	intron variant	LOC105194510	MODIFIER
NW_011794567.1	452471	A	G	intron variant	LOC105194510	MODIFIER
NW_011794567.1	452494	G	A	intron variant	LOC105194510	MODIFIER
NW_011794567.1	452621	C	T	intron variant	LOC105194510	MODIFIER
NW_011794567.1	457508	G	A	intron variant	LOC105194510	MODIFIER
NW_011794567.1	461575	A	G	intron variant	LOC105194510	MODIFIER
NW_011794567.1	469723	C	G	downstream gene variant	LOC105194855	MODIFIER
NW_011794567.1	478449	G	A	intron variant	LOC105194855	MODIFIER
NW_011794567.1	478775	G	A	intron variant	LOC105194855	MODIFIER
NW_011794567.1	480063	G	T	intron variant	LOC105194855	MODIFIER
NW_011794567.1	481676	G	A	intron variant	LOC105194855	MODIFIER
NW_011794567.1	483558	T	C	intron variant	LOC105194855	MODIFIER
NW_011794567.1	486300	G	A	intron variant	LOC105194855	MODIFIER
NW_011794567.1	495789	G	A	intron variant	LOC105194855	MODIFIER
NW_011794567.1	503202	C	T	upstream gene variant	LOC105194855	MODIFIER
NW_011794567.1	503391	G	A	upstream gene variant	LOC105194855	MODIFIER
NW_011794567.1	517930	C	T	intron variant	LOC105194522	MODIFIER
NW_011794567.1	526937	T	C	5 prime UTR variant	LOC105194522	MODIFIER
NW_011794567.1	526957	T	C	5 prime UTR variant	LOC105194522	MODIFIER
NW_011794567.1	527021	A	G	5 prime UTR variant	LOC105194522	MODIFIER
NW_011794567.1	527162	T	C	upstream gene variant	LOC105194522	MODIFIER
NW_011794567.1	527167	A	G	upstream gene variant	LOC105194522	MODIFIER
NW_011794567.1	528633	G	A	upstream gene variant	LOC105194864	MODIFIER
NW_011794567.1	541729	T	A	downstream gene variant	LOC105194551	MODIFIER
NW_011794567.1	545033	G	A	intergenic region	LOC105194551-LOC105194566	MODIFIER
NW_011794567.1	546858	G	A	intergenic region	LOC105194551-LOC105194566	MODIFIER
NW_011794567.1	546932	A	T	intergenic region	LOC105194551-LOC105194566	MODIFIER
NW_011794567.1	547066	C	T	intergenic region	LOC105194551-LOC105194566	MODIFIER
NW_011794567.1	552186	A	C	upstream gene variant	LOC105194566	MODIFIER
NW_011794567.1	553019	G	A	missense variant	LOC105194566	MODERATE
NW_011794567.1	553374	A	T	upstream gene variant	LOC105194575	MODIFIER
NW_011794567.1	553401	C	T	upstream gene variant	LOC105194575	MODIFIER
NW_011794567.1	553421	T	C	upstream gene variant	LOC105194575	MODIFIER
NW_011794567.1	553432	A	G	upstream gene variant	LOC105194575	MODIFIER
NW_011794567.1	556996	G	T	missense variant	LOC105194575	MODERATE
NW_011794567.1	557332	C	T	downstream gene variant	LOC105194566	MODIFIER
NW_011794567.1	558799	T	C	downstream gene variant	LOC105194566	MODIFIER
NW_011794567.1	560202	A	G	downstream gene variant	LOC105194575	MODIFIER
NW_011794567.1	560253	C	T	downstream gene variant	LOC105194575	MODIFIER
NW_011794567.1	560562	C	T	downstream gene variant	LOC105194575	MODIFIER
NW_011794567.1	562267	C	T	downstream gene variant	LOC105194575	MODIFIER
NW_011794567.1	562671	G	A	downstream gene variant	LOC105194575	MODIFIER
NW_011794567.1	562680	C	G	downstream gene variant	LOC105194575	MODIFIER
NW_011794567.1	562787	C	T	downstream gene variant	LOC105194575	MODIFIER
NW_011794567.1	564950	C	T	intergenic region	LOC105194575-LOC105194585	MODIFIER
NW_011794567.1	565368	G	A	intergenic region	LOC105194575-LOC105194585	MODIFIER
NW_011794567.1	566875	C	T	upstream gene variant	LOC105194585	MODIFIER
NW_011794567.1	567313	C	T	upstream gene variant	LOC105194585	MODIFIER
NW_011794567.1	569206	A	T	upstream gene variant	LOC105194585	MODIFIER
NW_011794567.1	570178	A	G	upstream gene variant	LOC105194585	MODIFIER
NW_011794567.1	571990	C	T	intron variant	LOC105194585	MODIFIER
NW_011794567.1	579236	C	T	intron variant	LOC105194585	MODIFIER
NW_011794567.1	580814	G	A	missense variant	LOC105194585	MODERATE
NW_011794567.1	583191	A	G	missense variant	LOC105194585	MODERATE
NW_011794567.1	583225	C	T	missense variant	LOC105194585	MODERATE
NW_011794567.1	589199	G	A	upstream gene variant	LOC105194872	MODIFIER
NW_011794567.1	591988	A	G	downstream gene variant	LOC105194585	MODIFIER
NW_011794567.1	593402	A	G	intron variant	LOC105194872	MODIFIER
NW_011794567.1	598482	G	A	intron variant	LOC105194872	MODIFIER
NW_011794567.1	598920	G	A	intron variant	LOC105194872	MODIFIER
NW_011794567.1	598941	T	A	intron variant	LOC105194872	MODIFIER
NW_011794567.1	599400	T	C	intron variant	LOC105194872	MODIFIER
NW_011794567.1	602711	C	T	intron variant	LOC105194872	MODIFIER
NW_011794567.1	603073	G	A	intron variant	LOC105194872	MODIFIER
NW_011794567.1	617016	G	A	downstream gene variant	LOC105194872	MODIFIER
NW_011794567.1	617303	C	T	downstream gene variant	LOC105194872	MODIFIER
NW_011794567.1	619018	C	T	upstream gene variant	LOC105194601	MODIFIER
NW_011794567.1	619173	T	C	upstream gene variant	LOC105194601	MODIFIER
NW_011794567.1	621083	G	A	upstream gene variant	LOC105194601	MODIFIER
NW_011794567.1	621155	T	A	upstream gene variant	LOC105194601	MODIFIER
NW_011794567.1	621716	A	C	upstream gene variant	LOC105194601	MODIFIER
NW_011794567.1	623604	A	G	intron variant	LOC105194601	MODIFIER
NW_011794567.1	624316	A	G	intron variant	LOC105194601	MODIFIER
NW_011794567.1	638579	A	T	intergenic region	LOC105194601-LOC105194610	MODIFIER
NW_011794567.1	640290	C	T	intergenic region	LOC105194601-LOC105194610	MODIFIER
NW_011794567.1	641662	T	A	intergenic region	LOC105194601-LOC105194610	MODIFIER
NW_011794567.1	642931	A	G	intergenic region	LOC105194601-LOC105194610	MODIFIER
NW_011794567.1	648359	G	A	intergenic region	LOC105194601-LOC105194610	MODIFIER
NW_011794567.1	649848	A	C	intergenic region	LOC105194601-LOC105194610	MODIFIER
NW_011794567.1	650642	G	A	upstream gene variant	LOC105194610	MODIFIER
NW_011794567.1	650700	G	A	upstream gene variant	LOC105194610	MODIFIER
NW_011794567.1	650742	C	T	upstream gene variant	LOC105194610	MODIFIER
NW_011794567.1	650802	G	A	upstream gene variant	LOC105194610	MODIFIER
NW_011794567.1	650998	C	T	upstream gene variant	LOC105194610	MODIFIER
NW_011794567.1	651048	A	C	upstream gene variant	LOC105194610	MODIFIER
NW_011794567.1	652009	G	A	upstream gene variant	LOC105194610	MODIFIER
NW_011794567.1	652081	G	A	upstream gene variant	LOC105194610	MODIFIER
NW_011794567.1	652241	C	T	upstream gene variant	LOC105194610	MODIFIER
NW_011794567.1	654069	G	A	upstream gene variant	LOC105194610	MODIFIER
NW_011794567.1	663491	G	T	intergenic region	LOC105194610-LOC105194616	MODIFIER
NW_011794567.1	664505	A	G	intergenic region	LOC105194610-LOC105194616	MODIFIER
NW_011794567.1	665689	G	A	intergenic region	LOC105194610-LOC105194616	MODIFIER
NW_011794567.1	666467	G	A	intergenic region	LOC105194610-LOC105194616	MODIFIER
NW_011794567.1	668770	A	C	intergenic region	LOC105194610-LOC105194616	MODIFIER
NW_011794567.1	669135	C	G	intergenic region	LOC105194610-LOC105194616	MODIFIER
NW_011794567.1	670001	T	C	intergenic region	LOC105194610-LOC105194616	MODIFIER
NW_011794567.1	673640	T	C	intergenic region	LOC105194610-LOC105194616	MODIFIER
NW_011794567.1	673872	G	A	intergenic region	LOC105194610-LOC105194616	MODIFIER
NW_011794567.1	680220	A	T	intergenic region	LOC105194610-LOC105194616	MODIFIER
NW_011794567.1	682469	A	G	intergenic region	LOC105194610-LOC105194616	MODIFIER
NW_011794567.1	692319	C	T	intergenic region	LOC105194610-LOC105194616	MODIFIER
NW_011794567.1	692346	C	T	intergenic region	LOC105194610-LOC105194616	MODIFIER
NW_011794567.1	692934	T	C	intergenic region	LOC105194610-LOC105194616	MODIFIER
NW_011794567.1	695180	G	A	intergenic region	LOC105194610-LOC105194616	MODIFIER
NW_011794567.1	698121	A	T	intergenic region	LOC105194610-LOC105194616	MODIFIER
NW_011794567.1	698602	C	A	intergenic region	LOC105194610-LOC105194616	MODIFIER
NW_011794567.1	706515	C	A	upstream gene variant	LOC105194616	MODIFIER
NW_011794567.1	706875	C	T	upstream gene variant	LOC105194616	MODIFIER
NW_011794567.1	708631	G	A	upstream gene variant	LOC105194616	MODIFIER
NW_011794567.1	710075	A	G	5 prime UTR variant	LOC105194616	MODIFIER
NW_011794567.1	712769	C	T	intron variant	LOC105194616	MODIFIER
NW_011794567.1	714585	T	A	intron variant	LOC105194616	MODIFIER
NW_011794567.1	716232	C	T	intron variant	LOC105194616	MODIFIER
NW_011794567.1	716930	G	A	intron variant	LOC105194616	MODIFIER
NW_011794567.1	723263	T	C	intron variant	LOC105194616	MODIFIER
NW_011794567.1	727775	C	T	intron variant	LOC105194616	MODIFIER
NW_011794567.1	730463	G	A	intron variant	LOC105194616	MODIFIER
NW_011794567.1	736454	G	A	intron variant	LOC105194616	MODIFIER
NW_011794567.1	739546	C	T	intron variant	LOC105194616	MODIFIER
NW_011794567.1	751264	C	T	intron variant	LOC105194616	MODIFIER
NW_011794567.1	751315	C	T	intron variant	LOC105194616	MODIFIER
NW_011794567.1	752821	A	G	intron variant	LOC105194616	MODIFIER
NW_011794567.1	752907	A	G	intron variant	LOC105194616	MODIFIER
NW_011794567.1	753630	T	C	intron variant	LOC105194616	MODIFIER
NW_011794567.1	767295	T	A	intron variant	LOC105194616	MODIFIER
NW_011794567.1	770370	G	A	intron variant	LOC105194616	MODIFIER
NW_011794567.1	773454	C	T	intron variant	LOC105194616	MODIFIER
NW_011794567.1	775027	G	A	intron variant	LOC105194616	MODIFIER
NW_011794567.1	779269	T	C	intron variant	LOC105194616	MODIFIER
NW_011794567.1	779457	G	A	intron variant	LOC105194616	MODIFIER
NW_011794567.1	790722	C	T	intron variant	LOC105194616	MODIFIER
NW_011794567.1	793759	T	A	intron variant	LOC105194616	MODIFIER
NW_011794567.1	793778	C	T	intron variant	LOC105194616	MODIFIER
NW_011794567.1	796244	G	A	intron variant	LOC105194616	MODIFIER
NW_011794567.1	802650	C	T	intron variant	LOC105194616	MODIFIER
NW_011794567.1	803187	C	T	intron variant	LOC105194616	MODIFIER
NW_011794567.1	804781	G	A	intron variant	LOC105194616	MODIFIER
NW_011794567.1	805351	T	C	intron variant	LOC105194616	MODIFIER
NW_011794567.1	807190	T	A	intron variant	LOC105194616	MODIFIER
NW_011794567.1	813522	T	C	intron variant	LOC105194616	MODIFIER
NW_011794567.1	832270	A	G	intron variant	LOC105194616	MODIFIER
NW_011794567.1	846198	C	T	intron variant	LOC105194616	MODIFIER
NW_011794567.1	847574	C	T	intron variant	LOC105194616	MODIFIER
NW_011794567.1	849605	A	T	intron variant	LOC105194616	MODIFIER
NW_011794567.1	850027	A	G	intron variant	LOC105194616	MODIFIER
NW_011794567.1	851058	G	C	intron variant	LOC105194616	MODIFIER
NW_011794567.1	853676	T	A	intron variant	LOC105194616	MODIFIER
NW_011794567.1	853708	C	A	intron variant	LOC105194616	MODIFIER
NW_011794567.1	853839	T	C	intron variant	LOC105194616	MODIFIER
NW_011794567.1	854521	A	G	intron variant	LOC105194616	MODIFIER
NW_011794567.1	855373	C	T	intron variant	LOC105194616	MODIFIER
NW_011794567.1	857366	C	T	intron variant	LOC105194616	MODIFIER
NW_011794567.1	862179	T	C	intron variant	LOC105194616	MODIFIER
NW_011794567.1	863950	A	T	intron variant	LOC105194616	MODIFIER
NW_011794567.1	866748	A	G	intron variant	LOC105194616	MODIFIER
NW_011794567.1	866898	A	C	intron variant	LOC105194616	MODIFIER
NW_011794567.1	871593	T	C	intron variant	LOC105194616	MODIFIER
NW_011794567.1	871954	G	A	intron variant	LOC105194616	MODIFIER
NW_011794567.1	877843	A	T	upstream gene variant	LOC105194616	MODIFIER
NW_011794567.1	879111	A	C	upstream gene variant	LOC105194616	MODIFIER
NW_011794567.1	879826	A	G	upstream gene variant	LOC105194616	MODIFIER
NW_011794567.1	879941	C	T	upstream gene variant	LOC105194616	MODIFIER
NW_011794567.1	880061	T	A	upstream gene variant	LOC105194616	MODIFIER
NW_011794567.1	880221	C	T	upstream gene variant	LOC105194616	MODIFIER
NW_011794567.1	886620	T	C	intron variant	LOC105194616	MODIFIER
NW_011794567.1	887028	T	C	intron variant	LOC105194616	MODIFIER
NW_011794567.1	887081	C	T	intron variant	LOC105194616	MODIFIER
NW_011794567.1	889227	T	G	intron variant	LOC105194616	MODIFIER
NW_011794567.1	894100	C	T	intron variant	LOC105194616	MODIFIER
NW_011794567.1	896947	G	A	intron variant	LOC105194616	MODIFIER
NW_011794567.1	903444	G	A	intron variant	LOC105194616	MODIFIER
NW_011794567.1	904571	G	A	intron variant	LOC105194616	MODIFIER
NW_011794567.1	905870	C	T	intron variant	LOC105194616	MODIFIER
NW_011794567.1	907308	T	C	intron variant	LOC105194616	MODIFIER
NW_011794567.1	907397	A	G	intron variant	LOC105194616	MODIFIER
NW_011794567.1	909159	C	T	intron variant	LOC105194616	MODIFIER
NW_011794567.1	910583	G	C	intron variant	LOC105194616	MODIFIER
NW_011794567.1	911174	T	C	intron variant	LOC105194616	MODIFIER
NW_011794567.1	912835	A	C	intron variant	LOC105194616	MODIFIER
NW_011794567.1	914111	C	T	intron variant	LOC105194616	MODIFIER
NW_011794567.1	914873	C	T	intron variant	LOC105194616	MODIFIER
NW_011794567.1	915600	G	T	intron variant	LOC105194616	MODIFIER
NW_011794567.1	915656	G	A	intron variant	LOC105194616	MODIFIER
NW_011794567.1	915948	G	C	intron variant	LOC105194616	MODIFIER
NW_011794567.1	919222	A	G	intron variant	LOC105194616	MODIFIER
NW_011794567.1	922056	T	A	intron variant	LOC105194616	MODIFIER
NW_011794567.1	927713	C	T	intron variant	LOC105194616	MODIFIER
NW_011794567.1	929748	G	A	intron variant	LOC105194616	MODIFIER
NW_011794567.1	930951	C	G	intron variant	LOC105194616	MODIFIER
NW_011794567.1	932386	G	T	intron variant	LOC105194616	MODIFIER
NW_011794567.1	934264	G	A	intron variant	LOC105194616	MODIFIER
NW_011794567.1	935001	C	T	intron variant	LOC105194616	MODIFIER
NW_011794567.1	941936	G	A	intron variant	LOC105194616	MODIFIER
NW_011794567.1	944231	T	C	intron variant	LOC105194616	MODIFIER
NW_011794567.1	944755	A	C	intron variant	LOC105194616	MODIFIER
NW_011794567.1	944804	A	G	intron variant	LOC105194616	MODIFIER
NW_011794567.1	945272	G	A	intron variant	LOC105194616	MODIFIER
NW_011794567.1	946893	G	A	upstream gene variant	LOC105194616	MODIFIER
NW_011794567.1	979292	A	G	intron variant	LOC105194616	MODIFIER
NW_011794567.1	979804	T	C	intron variant	LOC105194616	MODIFIER
NW_011794567.1	979997	A	G	intron variant	LOC105194616	MODIFIER
NW_011794567.1	1000064	A	G	intron variant	LOC105194616	MODIFIER
NW_011794567.1	1004387	G	A	intron variant	LOC105194616	MODIFIER
NW_011794567.1	1007343	G	A	intron variant	LOC105194616	MODIFIER
NW_011794567.1	1007989	T	C	intron variant	LOC105194616	MODIFIER
NW_011794567.1	1008138	C	T	intron variant	LOC105194616	MODIFIER
NW_011794567.1	1010869	A	G	intron variant	LOC105194616	MODIFIER
NW_011794567.1	1013504	G	A	intron variant	LOC105194616	MODIFIER
NW_011794567.1	1017779	G	C	intron variant	LOC105194616	MODIFIER
NW_011794567.1	1019012	C	T	intron variant	LOC105194616	MODIFIER
NW_011794567.1	1019184	A	G	intron variant	LOC105194616	MODIFIER
NW_011794567.1	1023107	A	G	intron variant	LOC105194616	MODIFIER
NW_011794567.1	1025146	A	G	intron variant	LOC105194616	MODIFIER
NW_011794567.1	1034782	T	C	intron variant	LOC105194616	MODIFIER
NW_011794567.1	1036994	T	G	intron variant	LOC105194616	MODIFIER
NW_011794567.1	1042124	A	G	intron variant	LOC105194616	MODIFIER
NW_011794567.1	1043620	A	G	intron variant	LOC105194616	MODIFIER
NW_011794567.1	1047917	G	A	intron variant	LOC105194616	MODIFIER
NW_011794567.1	1057749	C	T	intron variant	LOC105194616	MODIFIER
NW_011794567.1	1058405	G	A	intron variant	LOC105194616	MODIFIER
NW_011794567.1	1058548	G	C	intron variant	LOC105194616	MODIFIER
NW_011794567.1	1058803	G	A	intron variant	LOC105194616	MODIFIER
NW_011794567.1	1060680	G	A	intron variant	LOC105194616	MODIFIER
NW_011794567.1	1061208	T	A	intron variant	LOC105194616	MODIFIER
NW_011794567.1	1064313	G	A	intron variant	LOC105194616	MODIFIER
NW_011794567.1	1066918	G	A	intron variant	LOC105194616	MODIFIER
NW_011794567.1	1067039	G	A	intron variant	LOC105194616	MODIFIER
NW_011794567.1	1073376	C	T	intron variant	LOC105194616	MODIFIER
NW_011794567.1	1074726	A	G	intron variant	LOC105194616	MODIFIER
NW_011794567.1	1079540	T	C	intron variant	LOC105194616	MODIFIER
NW_011794567.1	1079816	C	T	intron variant	LOC105194616	MODIFIER
NW_011794567.1	1082678	A	G	intron variant	LOC105194616	MODIFIER
NW_011794567.1	1085340	A	C	intron variant	LOC105194616	MODIFIER
NW_011794567.1	1085384	C	T	intron variant	LOC105194616	MODIFIER
NW_011794567.1	1091558	G	A	intron variant	LOC105194616	MODIFIER
NW_011794567.1	1105336	A	G	intron variant	LOC105194616	MODIFIER
NW_011794567.1	1105748	A	G	intron variant	LOC105194616	MODIFIER
NW_011794567.1	1109371	T	C	intron variant	LOC105194616	MODIFIER
NW_011794567.1	1125059	C	T	upstream gene variant	LOC105194663	MODIFIER
NW_011794567.1	1126179	G	A	upstream gene variant	LOC105194663	MODIFIER
NW_011794567.1	1126362	C	T	upstream gene variant	LOC105194663	MODIFIER
NW_011794567.1	1126865	C	T	upstream gene variant	LOC105194663	MODIFIER
NW_011794567.1	1129113	C	T	upstream gene variant	LOC105194663	MODIFIER
NW_011794567.1	1134272	C	T	upstream gene variant	LOC105194878	MODIFIER
NW_011794567.1	1136332	C	T	downstream gene variant	LOC105194663	MODIFIER
NW_011794567.1	1138942	C	T	upstream gene variant	LOC105194672	MODIFIER
NW_011794567.1	1139913	T	A	upstream gene variant	LOC105194672	MODIFIER
NW_011794567.1	1143253	A	G	downstream gene variant	LOC105194878	MODIFIER
NW_011794567.1	1143258	A	C	downstream gene variant	LOC105194878	MODIFIER
NW_011794567.1	1143565	A	G	synonymous variant	LOC105194672	LOW
NW_011794567.1	1143963	T	G	upstream gene variant	LOC105194675	MODIFIER
NW_011794567.1	1143979	G	A	upstream gene variant	LOC105194675	MODIFIER
NW_011794567.1	1145121	G	T	upstream gene variant	LOC105194675	MODIFIER
NW_011794567.1	1147334	C	T	3 prime UTR variant	LOC105194672	MODIFIER
NW_011794567.1	1150113	C	T	missense variant	LOC105194675	MODERATE
NW_011794567.1	1150228	A	G	downstream gene variant	LOC105194672	MODIFIER
NW_011794567.1	1152012	C	T	downstream gene variant	LOC105194672	MODIFIER
NW_011794567.1	1154128	G	A	downstream gene variant	LOC105194675	MODIFIER
NW_011794567.1	1156114	C	T	downstream gene variant	LOC105194700	MODIFIER
NW_011794567.1	1159074	G	A	downstream gene variant	LOC105194700	MODIFIER
NW_011794567.1	1161611	C	T	intron variant	LOC105194700	MODIFIER
NW_011794567.1	1164334	G	A	intron variant	LOC105194700	MODIFIER
NW_011794567.1	1164395	T	C	intron variant	LOC105194700	MODIFIER
NW_011794567.1	1164416	G	C	intron variant	LOC105194700	MODIFIER
NW_011794567.1	1166551	C	T	intron variant	LOC105194700	MODIFIER
NW_011794567.1	1173421	T	G	intron variant	LOC105194700	MODIFIER
NW_011794567.1	1173426	T	G	intron variant	LOC105194700	MODIFIER
NW_011794567.1	1173709	G	A	intron variant	LOC105194700	MODIFIER
NW_011794567.1	1176173	A	G	intron variant	LOC105194700	MODIFIER
NW_011794567.1	1178509	G	A	intron variant	LOC105194700	MODIFIER
NW_011794567.1	1180289	C	T	intron variant	LOC105194700	MODIFIER
NW_011794567.1	1180297	T	C	intron variant	LOC105194700	MODIFIER
NW_011794567.1	1180539	C	T	intron variant	LOC105194700	MODIFIER
NW_011794567.1	1185081	G	A	intron variant	LOC105194700	MODIFIER
NW_011794567.1	1185513	T	C	intron variant	LOC105194700	MODIFIER
NW_011794567.1	1186163	C	T	intron variant	LOC105194700	MODIFIER
NW_011794567.1	1186169	G	T	intron variant	LOC105194700	MODIFIER
NW_011794567.1	1188115	C	T	intron variant	LOC105194700	MODIFIER
NW_011794567.1	1193361	C	T	upstream gene variant	LOC105194700	MODIFIER
NW_011794567.1	1194021	T	C	upstream gene variant	LOC105194700	MODIFIER
NW_011794567.1	1203584	C	T	intron variant	LOC105194700	MODIFIER
NW_011794567.1	1206022	G	A	intron variant	LOC105194700	MODIFIER
NW_011794567.1	1206219	G	A	intron variant	LOC105194700	MODIFIER
NW_011794567.1	1209417	C	T	intron variant	LOC105194700	MODIFIER
NW_011794567.1	1209810	G	A	intron variant	LOC105194700	MODIFIER
NW_011794567.1	1209948	C	T	intron variant	LOC105194700	MODIFIER
NW_011794567.1	1210265	C	G	intron variant	LOC105194700	MODIFIER
NW_011794567.1	1211406	G	A	intron variant	LOC105194700	MODIFIER
NW_011794567.1	1212741	C	T	intron variant	LOC105194700	MODIFIER
NW_011794567.1	1213693	C	G	intron variant	LOC105194700	MODIFIER
NW_011794567.1	1213719	C	T	intron variant	LOC105194700	MODIFIER
NW_011794567.1	1213742	C	T	intron variant	LOC105194700	MODIFIER
NW_011794567.1	1213757	C	T	intron variant	LOC105194700	MODIFIER
NW_011794567.1	1214455	T	C	intron variant	LOC105194700	MODIFIER
NW_011794567.1	1217716	G	A	intron variant	LOC105194700	MODIFIER
NW_011794567.1	1218338	A	G	intron variant	LOC105194700	MODIFIER
NW_011794567.1	1218362	C	T	intron variant	LOC105194700	MODIFIER
NW_011794567.1	1218396	C	T	intron variant	LOC105194700	MODIFIER
NW_011794567.1	1225041	G	A	intron variant	LOC105194700	MODIFIER
NW_011794567.1	1225086	G	C	intron variant	LOC105194700	MODIFIER
NW_011794567.1	1226211	G	T	intron variant	LOC105194700	MODIFIER
NW_011794567.1	1226273	C	T	intron variant	LOC105194700	MODIFIER
NW_011794567.1	1226541	T	C	intron variant	LOC105194700	MODIFIER
NW_011794567.1	1226546	G	T	intron variant	LOC105194700	MODIFIER
NW_011794567.1	1226601	G	A	intron variant	LOC105194700	MODIFIER
NW_011794567.1	1228081	A	T	intron variant	LOC105194700	MODIFIER
NW_011794567.1	1228436	C	A	intron variant	LOC105194700	MODIFIER
NW_011794567.1	1229103	A	G	intron variant	LOC105194700	MODIFIER
NW_011794567.1	1238045	G	A	intron variant	LOC105194700	MODIFIER
NW_011794567.1	1243324	G	A	intron variant	LOC105194700	MODIFIER
NW_011794567.1	1244011	G	A	intron variant	LOC105194700	MODIFIER
NW_011794567.1	1244408	G	T	intron variant	LOC105194700	MODIFIER
NW_011794567.1	1245709	C	T	intron variant	LOC105194700	MODIFIER
NW_011794567.1	1247615	C	T	intron variant	LOC105194700	MODIFIER
NW_011794567.1	1249954	A	G	intron variant	LOC105194700	MODIFIER
NW_011794567.1	1249989	G	A	intron variant	LOC105194700	MODIFIER
NW_011794567.1	1250042	T	C	intron variant	LOC105194700	MODIFIER
NW_011794567.1	1250900	G	A	intron variant	LOC105194700	MODIFIER
NW_011794567.1	1257392	A	G	intron variant	LOC105194700	MODIFIER
NW_011794567.1	1258764	G	A	intron variant	LOC105194700	MODIFIER
NW_011794567.1	1258996	C	T	intron variant	LOC105194700	MODIFIER
NW_011794567.1	1259686	A	G	intron variant	LOC105194700	MODIFIER
NW_011794567.1	1259716	T	C	intron variant	LOC105194700	MODIFIER
NW_011794567.1	1259747	G	A	intron variant	LOC105194700	MODIFIER
NW_011794567.1	1259836	T	C	intron variant	LOC105194700	MODIFIER
NW_011794567.1	1259916	T	G	intron variant	LOC105194700	MODIFIER
NW_011794567.1	1260183	G	T	intron variant	LOC105194700	MODIFIER
NW_011794567.1	1260354	G	A	intron variant	LOC105194700	MODIFIER
NW_011794567.1	1260521	C	T	intron variant	LOC105194700	MODIFIER
NW_011794567.1	1272450	G	A	intron variant	LOC105194700	MODIFIER
NW_011794567.1	1276379	G	A	intron variant	LOC105194700	MODIFIER
NW_011794567.1	1276489	G	A	intron variant	LOC105194700	MODIFIER
NW_011794567.1	1277330	C	A	intron variant	LOC105194700	MODIFIER
NW_011794567.1	1277652	A	G	intron variant	LOC105194700	MODIFIER
NW_011794567.1	1278060	G	A	intron variant	LOC105194700	MODIFIER
NW_011794567.1	1282547	G	A	upstream gene variant	LOC105194700	MODIFIER
NW_011794567.1	1283869	C	T	upstream gene variant	LOC105194700	MODIFIER
NW_011794567.1	1290625	C	T	intergenic region	LOC105194700-LOC105194690	MODIFIER
NW_011794567.1	1291110	C	T	intergenic region	LOC105194700-LOC105194690	MODIFIER
NW_011794567.1	1294184	A	G	intergenic region	LOC105194700-LOC105194690	MODIFIER
NW_011794567.1	1294212	T	C	intergenic region	LOC105194700-LOC105194690	MODIFIER
NW_011794567.1	1294247	G	A	intergenic region	LOC105194700-LOC105194690	MODIFIER
NW_011794567.1	1294256	G	A	intergenic region	LOC105194700-LOC105194690	MODIFIER
NW_011794567.1	1294388	C	T	intergenic region	LOC105194700-LOC105194690	MODIFIER
NW_011794567.1	1294481	T	A	intergenic region	LOC105194700-LOC105194690	MODIFIER
NW_011794567.1	1294887	T	C	intergenic region	LOC105194700-LOC105194690	MODIFIER
NW_011794567.1	1297794	C	A	intergenic region	LOC105194700-LOC105194690	MODIFIER
NW_011794567.1	1297804	C	T	intergenic region	LOC105194700-LOC105194690	MODIFIER
NW_011794567.1	1298281	C	T	intergenic region	LOC105194700-LOC105194690	MODIFIER
NW_011794567.1	1298375	G	A	intergenic region	LOC105194700-LOC105194690	MODIFIER
NW_011794567.1	1300487	C	T	intergenic region	LOC105194700-LOC105194690	MODIFIER
NW_011794567.1	1301600	A	C	intergenic region	LOC105194700-LOC105194690	MODIFIER
NW_011794567.1	1302235	G	A	intergenic region	LOC105194700-LOC105194690	MODIFIER
NW_011794567.1	1302689	G	C	intergenic region	LOC105194700-LOC105194690	MODIFIER
NW_011794567.1	1303139	G	A	intergenic region	LOC105194700-LOC105194690	MODIFIER
NW_011794567.1	1305014	C	T	intergenic region	LOC105194700-LOC105194690	MODIFIER
NW_011794567.1	1305993	C	T	intergenic region	LOC105194700-LOC105194690	MODIFIER
NW_011794567.1	1306701	A	G	intergenic region	LOC105194700-LOC105194690	MODIFIER
NW_011794567.1	1307276	T	C	intergenic region	LOC105194700-LOC105194690	MODIFIER
NW_011794567.1	1307536	A	G	intergenic region	LOC105194700-LOC105194690	MODIFIER
NW_011794567.1	1308419	G	A	intergenic region	LOC105194700-LOC105194690	MODIFIER
NW_011794567.1	1308762	C	T	intergenic region	LOC105194700-LOC105194690	MODIFIER
NW_011794567.1	1308776	G	A	intergenic region	LOC105194700-LOC105194690	MODIFIER
NW_011794567.1	1309208	T	C	intergenic region	LOC105194700-LOC105194690	MODIFIER
NW_011794567.1	1311307	G	A	intergenic region	LOC105194700-LOC105194690	MODIFIER
NW_011794567.1	1311396	T	C	intergenic region	LOC105194700-LOC105194690	MODIFIER
NW_011794567.1	1312296	G	A	intergenic region	LOC105194700-LOC105194690	MODIFIER
NW_011794567.1	1313378	C	T	intergenic region	LOC105194700-LOC105194690	MODIFIER
NW_011794567.1	1313680	C	T	intergenic region	LOC105194700-LOC105194690	MODIFIER
NW_011794567.1	1314346	G	A	intergenic region	LOC105194700-LOC105194690	MODIFIER
NW_011794567.1	1314722	C	A	intergenic region	LOC105194700-LOC105194690	MODIFIER
NW_011794567.1	1315830	C	T	intergenic region	LOC105194700-LOC105194690	MODIFIER
NW_011794567.1	1316638	C	T	intergenic region	LOC105194700-LOC105194690	MODIFIER
NW_011794567.1	1322029	C	T	intergenic region	LOC105194700-LOC105194690	MODIFIER
NW_011794567.1	1323241	C	A	intergenic region	LOC105194700-LOC105194690	MODIFIER
NW_011794567.1	1323419	C	T	intergenic region	LOC105194700-LOC105194690	MODIFIER
NW_011794567.1	1323983	G	A	intergenic region	LOC105194700-LOC105194690	MODIFIER
NW_011794567.1	1324343	G	A	intergenic region	LOC105194700-LOC105194690	MODIFIER
NW_011794567.1	1324917	T	C	intergenic region	LOC105194700-LOC105194690	MODIFIER
NW_011794567.1	1325451	T	C	intergenic region	LOC105194700-LOC105194690	MODIFIER
NW_011794567.1	1326301	G	A	intergenic region	LOC105194700-LOC105194690	MODIFIER
NW_011794567.1	1327157	G	A	upstream gene variant	LOC105194690	MODIFIER
NW_011794567.1	1327206	T	C	upstream gene variant	LOC105194690	MODIFIER
NW_011794567.1	1327305	G	A	upstream gene variant	LOC105194690	MODIFIER
NW_011794567.1	1327320	G	T	upstream gene variant	LOC105194690	MODIFIER
NW_011794567.1	1327394	G	A	upstream gene variant	LOC105194690	MODIFIER
NW_011794567.1	1327566	T	C	upstream gene variant	LOC105194690	MODIFIER
NW_011794567.1	1329158	T	C	upstream gene variant	LOC105194690	MODIFIER
NW_011794567.1	1329372	G	A	upstream gene variant	LOC105194690	MODIFIER
NW_011794567.1	1353074	A	T	intergenic region	LOC105194690-LOC105194887	MODIFIER
NW_011794567.1	1359351	T	C	intergenic region	LOC105194690-LOC105194887	MODIFIER
NW_011794567.1	1359750	C	T	intergenic region	LOC105194690-LOC105194887	MODIFIER
NW_011794567.1	1362446	C	T	intergenic region	LOC105194690-LOC105194887	MODIFIER
NW_011794567.1	1362627	T	C	intergenic region	LOC105194690-LOC105194887	MODIFIER
NW_011794567.1	1363677	G	A	intergenic region	LOC105194690-LOC105194887	MODIFIER
NW_011794567.1	1370006	G	A	intergenic region	LOC105194690-LOC105194887	MODIFIER
NW_011794567.1	1377655	G	A	intron variant	LOC105194887	MODIFIER
NW_011794567.1	1378812	G	A	intron variant	LOC105194887	MODIFIER
NW_011794567.1	1380136	C	T	intron variant	LOC105194887	MODIFIER
NW_011794567.1	1382234	A	G	intron variant	LOC105194887	MODIFIER
NW_011794567.1	1382248	A	G	intron variant	LOC105194887	MODIFIER
NW_011794567.1	1390912	G	A	intron variant	LOC105194887	MODIFIER
NW_011794567.1	1395102	A	G	intron variant	LOC105194887	MODIFIER
NW_011794567.1	1400769	G	A	intron variant	LOC105194887	MODIFIER
NW_011794567.1	1400868	C	T	intron variant	LOC105194887	MODIFIER
NW_011794567.1	1400918	T	G	intron variant	LOC105194887	MODIFIER
NW_011794567.1	1426417	G	A	upstream gene variant	LOC105194894	MODIFIER
NW_011794567.1	1426547	G	A	upstream gene variant	LOC105194894	MODIFIER
NW_011794567.1	1430565	C	T	downstream gene variant	LOC105194894	MODIFIER
NW_011794567.1	1432492	A	G	downstream gene variant	LOC105194894	MODIFIER
NW_011794567.1	1434922	C	T	intergenic region	LOC105194894-LOC105194680	MODIFIER
NW_011794567.1	1457287	A	T	intron variant	LOC105194680	MODIFIER
NW_011794567.1	1457681	G	A	intron variant	LOC105194680	MODIFIER
NW_011794567.1	1457729	G	C	intron variant	LOC105194680	MODIFIER
NW_011794567.1	1458585	C	A	intron variant	LOC105194680	MODIFIER
NW_011794567.1	1460848	C	T	intron variant	LOC105194680	MODIFIER
NW_011794567.1	1462647	T	C	intron variant	LOC105194680	MODIFIER
NW_011794567.1	1462652	C	T	intron variant	LOC105194680	MODIFIER
NW_011794567.1	1462961	A	T	intron variant	LOC105194680	MODIFIER
NW_011794567.1	1468202	C	T	intron variant	LOC105194680	MODIFIER
NW_011794567.1	1470654	C	T	intron variant	LOC105194680	MODIFIER
NW_011794567.1	1470882	C	T	intron variant	LOC105194680	MODIFIER
NW_011794567.1	1470895	C	T	intron variant	LOC105194680	MODIFIER
NW_011794567.1	1470924	C	T	intron variant	LOC105194680	MODIFIER
NW_011794567.1	1470935	A	G	intron variant	LOC105194680	MODIFIER
NW_011794567.1	1481404	T	C	intron variant	LOC105194680	MODIFIER
NW_011794567.1	1483868	T	C	intron variant	LOC105194680	MODIFIER
NW_011794567.1	1492107	C	T	intron variant	LOC105194680	MODIFIER
NW_011794567.1	1494563	T	C	intron variant	LOC105194680	MODIFIER
NW_011794567.1	1495341	G	A	intron variant	LOC105194680	MODIFIER
NW_011794567.1	1495518	A	C	intron variant	LOC105194680	MODIFIER
NW_011794567.1	1496749	A	C	intron variant	LOC105194680	MODIFIER
NW_011794567.1	1498867	C	T	intron variant	LOC105194680	MODIFIER
NW_011794567.1	1499344	G	A	intron variant	LOC105194680	MODIFIER
NW_011794567.1	1507239	T	C	intron variant	LOC105194680	MODIFIER
NW_011794567.1	1515924	C	T	downstream gene variant	LOC105194680	MODIFIER
NW_011794567.1	1517390	A	C	upstream gene variant	LOC105194714	MODIFIER
NW_011794567.1	1521163	C	T	upstream gene variant	LOC105194714	MODIFIER
NW_011794567.1	1545487	A	G	intergenic region	LOC105194714-LOC105194727	MODIFIER
NW_011794567.1	1551911	C	T	intergenic region	LOC105194714-LOC105194727	MODIFIER
NW_011794567.1	1552153	A	T	intergenic region	LOC105194714-LOC105194727	MODIFIER
NW_011794567.1	1556508	G	A	intergenic region	LOC105194714-LOC105194727	MODIFIER
NW_011794567.1	1561665	G	A	intergenic region	LOC105194714-LOC105194727	MODIFIER
NW_011794567.1	1561829	G	A	intergenic region	LOC105194714-LOC105194727	MODIFIER
NW_011794567.1	1561897	A	G	intergenic region	LOC105194714-LOC105194727	MODIFIER
NW_011794567.1	1561903	C	T	intergenic region	LOC105194714-LOC105194727	MODIFIER
NW_011794567.1	1561908	T	A	intergenic region	LOC105194714-LOC105194727	MODIFIER
NW_011794567.1	1563827	G	T	intergenic region	LOC105194714-LOC105194727	MODIFIER
NW_011794567.1	1579075	A	C	intron variant	LOC105194727	MODIFIER
NW_011794567.1	1579537	C	T	intron variant	LOC105194727	MODIFIER
NW_011794567.1	1592521	A	G	intron variant	LOC105194727	MODIFIER
NW_011794567.1	1592544	C	T	intron variant	LOC105194727	MODIFIER
NW_011794567.1	1596881	G	A	intron variant	LOC105194727	MODIFIER
NW_011794567.1	1596916	T	C	intron variant	LOC105194727	MODIFIER
NW_011794567.1	1598256	G	A	intron variant	LOC105194727	MODIFIER
NW_011794567.1	1598298	T	C	intron variant	LOC105194727	MODIFIER
NW_011794567.1	1609756	C	A	intron variant	LOC105194727	MODIFIER
NW_011794567.1	1610137	C	T	intron variant	LOC105194727	MODIFIER
NW_011794567.1	1618500	G	A	intron variant	LOC105194727	MODIFIER
NW_011794567.1	1626519	G	A	intron variant	LOC105194727	MODIFIER
NW_011794567.1	1640430	T	C	intron variant	LOC105194727	MODIFIER
NW_011794567.1	1653998	C	T	intron variant	LOC105194727	MODIFIER
NW_011794567.1	1655053	C	T	downstream gene variant	LOC105194727	MODIFIER
NW_011794567.1	1669141	G	A	intergenic region	LOC105192714-1-LOC105194738	MODIFIER
NW_011794567.1	1669185	G	A	intergenic region	LOC105192714-1-LOC105194738	MODIFIER
NW_011794567.1	1669235	A	G	intergenic region	LOC105192714-1-LOC105194738	MODIFIER
NW_011794567.1	1671042	T	C	intergenic region	LOC105192714-1-LOC105194738	MODIFIER
NW_011794567.1	1671066	C	T	intergenic region	LOC105192714-1-LOC105194738	MODIFIER
NW_011794567.1	1671641	C	T	intergenic region	LOC105192714-1-LOC105194738	MODIFIER
NW_011794567.1	1672263	G	A	intergenic region	LOC105192714-1-LOC105194738	MODIFIER
NW_011794567.1	1672306	A	T	intergenic region	LOC105192714-1-LOC105194738	MODIFIER
NW_011794567.1	1672945	G	A	intergenic region	LOC105192714-1-LOC105194738	MODIFIER
NW_011794567.1	1673023	A	G	intergenic region	LOC105192714-1-LOC105194738	MODIFIER
NW_011794567.1	1673267	G	A	intergenic region	LOC105192714-1-LOC105194738	MODIFIER
NW_011794567.1	1673953	T	C	intergenic region	LOC105192714-1-LOC105194738	MODIFIER
NW_011794567.1	1674092	G	T	intergenic region	LOC105192714-1-LOC105194738	MODIFIER
NW_011794567.1	1674123	G	A	intergenic region	LOC105192714-1-LOC105194738	MODIFIER
NW_011794567.1	1674315	C	T	intergenic region	LOC105192714-1-LOC105194738	MODIFIER
NW_011794567.1	1677124	A	G	intergenic region	LOC105192714-1-LOC105194738	MODIFIER
NW_011794567.1	1677319	T	C	intergenic region	LOC105192714-1-LOC105194738	MODIFIER
NW_011794567.1	1701566	C	T	intron variant	LOC105194738	MODIFIER
NW_011794567.1	1701843	G	C	intron variant	LOC105194738	MODIFIER
NW_011794567.1	1702337	G	A	intron variant	LOC105194738	MODIFIER
NW_011794567.1	1702720	C	T	intron variant	LOC105194738	MODIFIER
NW_011794567.1	1703600	C	T	intron variant	LOC105194738	MODIFIER
NW_011794567.1	1703836	G	A	intron variant	LOC105194738	MODIFIER
NW_011794567.1	1705279	A	G	intron variant	LOC105194738	MODIFIER
NW_011794567.1	1706066	C	T	intron variant	LOC105194738	MODIFIER
NW_011794567.1	1710730	G	A	intron variant	LOC105194738	MODIFIER
NW_011794567.1	1722562	T	C	intron variant	LOC105194738	MODIFIER
NW_011794567.1	1724203	A	G	intron variant	LOC105194738	MODIFIER
NW_011794567.1	1729003	T	C	intron variant	LOC105194738	MODIFIER
NW_011794567.1	1729893	C	T	intron variant	LOC105194738	MODIFIER
NW_011794567.1	1729913	C	T	intron variant	LOC105194738	MODIFIER
NW_011794567.1	1734807	C	T	intron variant	LOC105194738	MODIFIER
NW_011794567.1	1734812	A	G	intron variant	LOC105194738	MODIFIER
NW_011794567.1	1737506	T	C	intron variant	LOC105194738	MODIFIER
NW_011794567.1	1737533	C	T	intron variant	LOC105194738	MODIFIER
NW_011794567.1	1737885	T	C	intron variant	LOC105194738	MODIFIER
NW_011794567.1	1741745	C	T	intron variant	LOC105194738	MODIFIER
NW_011794567.1	1742311	G	A	intron variant	LOC105194738	MODIFIER
NW_011794567.1	1742706	G	A	intron variant	LOC105194738	MODIFIER
NW_011794567.1	1750606	T	C	upstream gene variant	LOC105194738	MODIFIER
NW_011794567.1	1764967	G	A	intron variant	LOC105194738	MODIFIER
NW_011794567.1	1764989	G	A	intron variant	LOC105194738	MODIFIER
NW_011794567.1	1776685	T	C	intron variant	LOC105194738	MODIFIER
NW_011794567.1	1782542	A	G	intron variant	LOC105194738	MODIFIER
NW_011794567.1	1785457	G	A	intron variant	LOC105194738	MODIFIER
NW_011794567.1	1788781	T	C	intron variant	LOC105194738	MODIFIER
NW_011794567.1	1794776	G	A	intron variant	LOC105194738	MODIFIER
NW_011794567.1	1800016	C	T	intron variant	LOC105194738	MODIFIER
NW_011794567.1	1819386	G	A	downstream gene variant	LOC105194763	MODIFIER
NW_011794567.1	1824590	G	A	3 prime UTR variant	LOC105194763	MODIFIER
NW_011794567.1	1824893	A	G	3 prime UTR variant	LOC105194763	MODIFIER
NW_011794567.1	1851679	T	C	intron variant	LOC105194763	MODIFIER
NW_011795727.1	20264	C	T	intron variant	LOC105193215	MODIFIER
NW_011795727.1	43361	C	A	intron variant	LOC105193215	MODIFIER
NW_011795727.1	52259	G	A	intron variant	LOC105193215	MODIFIER
NW_011795727.1	53550	C	T	intron variant	LOC105193215	MODIFIER
NW_011795727.1	62625	G	A	intron variant	LOC105193215	MODIFIER
NW_011795727.1	99715	T	C	upstream gene variant	LOC105193215	MODIFIER
NW_011795727.1	99779	C	G	upstream gene variant	LOC105193215	MODIFIER
NW_011795727.1	104646	C	T	upstream gene variant	LOC105193215	MODIFIER
NW_011795727.1	108196	A	C	upstream gene variant	LOC105193215	MODIFIER
NW_011795727.1	122288	G	A	downstream gene variant	LOC105193216	MODIFIER
NW_011795727.1	122316	A	G	downstream gene variant	LOC105193216	MODIFIER
NW_011795727.1	129628	G	A	splice region variant&intron variant	LOC105193216	LOW
NW_011795727.1	131388	C	A	intron variant	LOC105193216	MODIFIER
NW_011795727.1	138670	A	T	upstream gene variant	LOC105193216	MODIFIER
NW_011795727.1	144901	T	C	downstream gene variant	LOC105193217	MODIFIER
NW_011795727.1	144955	T	A	downstream gene variant	LOC105193217	MODIFIER
NW_011795727.1	145948	C	T	downstream gene variant	LOC105193217	MODIFIER
NW_011795727.1	146111	A	T	downstream gene variant	LOC105193217	MODIFIER
NW_011795727.1	146125	C	T	downstream gene variant	LOC105193217	MODIFIER
NW_011795727.1	146195	A	G	downstream gene variant	LOC105193217	MODIFIER
NW_011795727.1	151282	C	T	downstream gene variant	LOC105193218	MODIFIER
NW_011795727.1	153490	C	A	downstream gene variant	LOC105193218	MODIFIER
NW_011795727.1	154258	C	G	upstream gene variant	LOC105193219	MODIFIER
NW_011795727.1	167972	C	T	synonymous variant	LOC105193220	LOW
NW_011795727.1	168589	T	C	missense variant	LOC105193220	MODERATE
NW_011795727.1	169248	A	G	missense variant	LOC105193220	MODERATE
NW_011795727.1	169919	T	A	missense variant	LOC105193220	MODERATE
NW_011795727.1	169968	A	T	missense variant	LOC105193220	MODERATE
NW_011795727.1	179210	T	C	downstream gene variant	LOC105193224	MODIFIER
NW_011795727.1	180779	G	A	3 prime UTR variant	LOC105193222	MODIFIER
NW_011795727.1	181051	G	A	3 prime UTR variant	LOC105193222	MODIFIER
NW_011795727.1	182182	G	A	3 prime UTR variant	LOC105193222	MODIFIER
NW_011795727.1	182838	A	G	3 prime UTR variant	LOC105193222	MODIFIER
NW_011795727.1	184696	C	T	upstream gene variant	LOC105193223	MODIFIER
NW_011795727.1	191614	G	A	upstream gene variant	LOC105193224	MODIFIER
NW_011795727.1	192574	A	T	upstream gene variant	LOC105193225	MODIFIER
NW_011795727.1	197005	C	T	intron variant	LOC105193225	MODIFIER
NW_011795727.1	197342	G	A	intron variant	LOC105193225	MODIFIER
NW_011795727.1	200179	A	G	intron variant	LOC105193225	MODIFIER
NW_011795727.1	200846	C	T	intron variant	LOC105193225	MODIFIER
NW_011795727.1	201322	C	A	intron variant	LOC105193225	MODIFIER
NW_011795727.1	202515	G	A	intron variant	LOC105193225	MODIFIER
NW_011795727.1	210729	T	A	intron variant	LOC105193225	MODIFIER
NW_011795727.1	213806	C	T	intron variant	LOC105193225	MODIFIER
NW_011795727.1	216128	A	G	intron variant	LOC105193225	MODIFIER
NW_011795727.1	219694	C	T	intron variant	LOC105193225	MODIFIER
NW_011795727.1	219794	T	G	intron variant	LOC105193225	MODIFIER
NW_011795727.1	220164	G	C	intron variant	LOC105193225	MODIFIER
NW_011795727.1	223124	A	G	intron variant	LOC105193225	MODIFIER
NW_011795727.1	223424	G	A	intron variant	LOC105193225	MODIFIER
NW_011795727.1	232892	T	C	intron variant	LOC105193225	MODIFIER
NW_011795727.1	237767	C	T	intron variant	LOC105193225	MODIFIER
NW_011795727.1	239065	C	T	intron variant	LOC105193225	MODIFIER
NW_011795727.1	247212	T	C	intron variant	LOC105193225	MODIFIER
NW_011795727.1	248326	A	G	intron variant	LOC105193225	MODIFIER
NW_011795727.1	252259	G	A	intron variant	LOC105193225	MODIFIER
NW_011795727.1	257430	T	A	intron variant	LOC105193225	MODIFIER
NW_011795727.1	260473	C	T	intron variant	LOC105193225	MODIFIER
NW_011795727.1	262075	G	A	intron variant	LOC105193225	MODIFIER
NW_011795727.1	262778	A	G	intron variant	LOC105193225	MODIFIER
NW_011795727.1	262937	A	G	intron variant	LOC105193225	MODIFIER
NW_011795727.1	262963	G	C	intron variant	LOC105193225	MODIFIER
NW_011795727.1	264105	A	T	intron variant	LOC105193225	MODIFIER
NW_011795727.1	264150	A	C	intron variant	LOC105193225	MODIFIER
NW_011795727.1	264649	T	G	intron variant	LOC105193225	MODIFIER
NW_011795727.1	268262	A	T	intron variant	LOC105193225	MODIFIER
NW_011795727.1	270297	T	C	intron variant	LOC105193225	MODIFIER
NW_011795727.1	274055	C	T	intron variant	LOC105193225	MODIFIER
NW_011795727.1	283646	C	G	intron variant	LOC105193225	MODIFIER
NW_011795727.1	285726	T	C	intron variant	LOC105193225	MODIFIER
NW_011795727.1	286339	C	T	intron variant	LOC105193225	MODIFIER
NW_011795727.1	288301	G	A	intron variant	LOC105193225	MODIFIER
NW_011795727.1	288327	C	A	intron variant	LOC105193225	MODIFIER
NW_011795727.1	291005	T	C	intron variant	LOC105193225	MODIFIER
NW_011795727.1	295282	C	G	intron variant	LOC105193225	MODIFIER
NW_011795727.1	297523	T	G	intron variant	LOC105193225	MODIFIER
NW_011795727.1	298357	C	T	intron variant	LOC105193225	MODIFIER
NW_011795727.1	299388	G	A	intron variant	LOC105193225	MODIFIER
NW_011795727.1	300997	C	T	intron variant	LOC105193225	MODIFIER
NW_011795727.1	305826	G	C	intron variant	LOC105193225	MODIFIER
NW_011795727.1	306460	C	T	intron variant	LOC105193225	MODIFIER
NW_011795727.1	316178	C	T	intron variant	LOC105193225	MODIFIER
NW_011795727.1	316389	A	G	intron variant	LOC105193225	MODIFIER
NW_011795727.1	318709	T	C	intron variant	LOC105193225	MODIFIER
NW_011795727.1	318718	A	C	intron variant	LOC105193225	MODIFIER
NW_011795727.1	319360	C	T	intron variant	LOC105193225	MODIFIER
NW_011795727.1	321154	C	T	intron variant	LOC105193225	MODIFIER
NW_011795727.1	322327	G	A	intron variant	LOC105193225	MODIFIER
NW_011795727.1	323832	G	A	intron variant	LOC105193225	MODIFIER
NW_011795727.1	324043	C	T	intron variant	LOC105193225	MODIFIER
NW_011795727.1	326637	G	C	intron variant	LOC105193225	MODIFIER
NW_011795727.1	331609	T	C	intron variant	LOC105193225	MODIFIER
NW_011795727.1	333864	G	A	intron variant	LOC105193225	MODIFIER
NW_011795727.1	336249	A	G	intron variant	LOC105193225	MODIFIER
NW_011795727.1	341776	C	T	intron variant	LOC105193225	MODIFIER
NW_011795727.1	342785	G	A	intron variant	LOC105193225	MODIFIER
NW_011795727.1	342866	A	C	intron variant	LOC105193225	MODIFIER
NW_011795727.1	350176	C	T	intron variant	LOC105193225	MODIFIER
NW_011795727.1	350274	G	T	intron variant	LOC105193225	MODIFIER
NW_011795727.1	352572	A	G	intron variant	LOC105193225	MODIFIER
NW_011795727.1	352780	A	G	intron variant	LOC105193225	MODIFIER
NW_011795727.1	352785	A	G	intron variant	LOC105193225	MODIFIER
NW_011795727.1	353663	T	A	intron variant	LOC105193225	MODIFIER
NW_011795727.1	354173	C	T	intron variant	LOC105193225	MODIFIER
NW_011795727.1	354601	A	G	intron variant	LOC105193225	MODIFIER
NW_011795727.1	369606	T	G	intron variant	LOC105193225	MODIFIER
NW_011795727.1	369849	C	T	intron variant	LOC105193225	MODIFIER
NW_011795727.1	374298	G	A	intron variant	LOC105193225	MODIFIER
NW_011795727.1	377443	G	A	intron variant	LOC105193225	MODIFIER
NW_011795727.1	386688	G	A	intron variant	LOC105193225	MODIFIER
NW_011795727.1	386913	G	A	intron variant	LOC105193225	MODIFIER
NW_011795727.1	400818	T	C	intron variant	LOC105193225	MODIFIER
NW_011795727.1	408195	G	A	intron variant	LOC105193225	MODIFIER
NW_011795727.1	410889	C	T	intron variant	LOC105193225	MODIFIER
NW_011795727.1	416138	C	T	intron variant	LOC105193225	MODIFIER
NW_011795727.1	419577	C	T	intron variant	LOC105193225	MODIFIER
[truncated: 878 more rows]
