# Supplementary material for: Genomic architecture and evolutionary antagonism drive allelic expression bias in the social supergene of red fire ants
Source: eLife journal article supplement (doi:10.7554/elife.55862), 2020-08-10
Supplement: supp [file elife-55862-supp-v1.zip › elife_poa_e55862_Supplementary_file_2.xlsx]

## Sheet: Sheet1
Gene description	Gene RefSeq ID	Differentially expressed in social forms	Allele-specific expression bias
carbohydrate sulfotransferase 11-like	LOC105193134	No	SB
uncharacterized LOC105193135	LOC105193135	No	Sb
pheromone-binding protein Gp-9	LOC105194481	Higher in multiple-queen	Sb
retinol-binding protein pinta-like	LOC105199327	Higher in multiple-queen	Sb
ejaculatory bulb-specific protein 3	LOC105199531	Higher in multiple-queen	SB
uncharacterized LOC105199756	LOC105199756	No	SB
calcium-independent phospholipase A2-gamma	LOC105203065	No	SB
