# Supplementary material for: Genomic architecture and evolutionary antagonism drive allelic expression bias in the social supergene of red fire ants
Source: eLife journal article supplement (doi:10.7554/elife.55862), 2020-08-10
Supplement: supp [file elife-55862-supp-v1.zip › elife_poa_e55862_Supplementary_file_3.xlsx]

## Sheet: Sheet1
a)	Gene description	Gene RefSeq ID	Log2 expression ratio	Highly expressed in	Significant	b)	Gene description	Gene RefSeq ID	Log2 expression ratio	Highly expressed in	Significant	c)	Gene description	Gene RefSeq ID	Log2 expression ratio	Highly expressed in	Significant
	tankyrase	LOC105193132	0.953692	SB	Yes		venom serine protease Bi-VSP-like	LOC105193130	2.36685	SB	Yes		high affinity copper uptake protein 1	LOC105193217	1.44074	SB	Yes
	carbohydrate sulfotransferase 11-like	LOC105193134	1.44455	SB	Yes		carbohydrate sulfotransferase 11-like	LOC105193134	1.2999	SB	Yes		histone RNA hairpin-binding protein	LOC105193831	0.911404	SB	Yes
	uncharacterized LOC105193135	LOC105193135	-1.02357	Sb	Yes		leucine-rich repeat-containing protein 15-like	LOC105193138	2.43203	SB	Yes		modular serine protease-like	LOC105194425	2.59797	SB	Yes
	leishmanolysin-like peptidase	LOC105193225	-1.6753	Sb	Yes		uncharacterized LOC105193825	LOC105193825	-1.86935	Sb	Yes		modular serine protease-like	LOC105194434	-3.18513	Sb	Yes
	ejaculatory bulb-specific protein 3	LOC105199531	5.74012	SB	Yes		histone RNA hairpin-binding protein	LOC105193831	0.907764	SB	Yes		pheromone-binding protein Gp-9	LOC105194481	-0.600368	Sb	Yes
	NADH dehydrogenase [ubiquinone] 1 alpha subcomplex subunit 9, mitochondrial-like	LOC105199789	-3.95145	Sb	Yes		modular serine protease-like	LOC105194434	-2.47525	Sb	Yes		NADH dehydrogenase [ubiquinone] 1 alpha subcomplex subunit 9, mitochondrial-like	LOC105194811	1.49363	SB	Yes
	ubiquitin-like domain-containing CTD phosphatase 1	LOC105199797	-1.10294	Sb	Yes		pheromone-binding protein Gp-9	LOC105194481	-0.756475	Sb	Yes		NADH dehydrogenase [ubiquinone] 1 alpha subcomplex subunit 9, mitochondrial-like	LOC105194902	-2.0882	Sb	Yes
	cytochrome P450 4C1	LOC105202818	1.3512	SB	Yes		pheromone-binding protein Gp-9-like	LOC105194501	-1.67578	Sb	Yes		alpha-2-macroglobulin receptor-associated protein	LOC105199295	-1.5405	Sb	Yes
	DE-cadherin	LOC105203024	-1.32726	Sb	Yes		NADH dehydrogenase [ubiquinone] 1 alpha subcomplex subunit 9, mitochondrial-like	LOC105194811	2.80838	SB	Yes		dynein regulatory complex subunit 4	LOC105199315	-2.42582	Sb	Yes
	uncharacterized LOC105203040	LOC105203040	-1.00784	Sb	Yes		NADH dehydrogenase [ubiquinone] 1 alpha subcomplex subunit 9, mitochondrial-like	LOC105194902	-2.38605	Sb	Yes		copper homeostasis protein cutC homolog	LOC105199321	1.68609	SB	Yes
	acyl-CoA Delta(11) desaturase	LOC105204968	2.56567	SB	Yes		nanos homolog 3-like	LOC105195826	-1.74419	Sb	Yes		retinol-binding protein pinta-like	LOC105199352	-1.85625	Sb	Yes
	suppressor of lurcher protein 1	LOC105204975	1.5965	SB	Yes		alpha-2-macroglobulin receptor-associated protein	LOC105199295	-0.884091	Sb	Yes		ejaculatory bulb-specific protein 3	LOC105199531	1.5979	SB	Yes
	bromodomain-containing protein 8	LOC105193114	-0.0642694	Sb	No		dynein regulatory complex subunit 4	LOC105199315	-2.57112	Sb	Yes		venom allergen 3	LOC105199698	2.35871	SB	Yes
	tetraspanin-33	LOC105193116	-0.0619162	Sb	No		galactoside 2-alpha-L-fucosyltransferase 2-like	LOC105199316	-1.14438	Sb	Yes		NADH dehydrogenase [ubiquinone] 1 alpha subcomplex subunit 9, mitochondrial-like	LOC105199789	-2.46797	Sb	Yes
	E3 ubiquitin-protein ligase COP1-like	LOC105193120	0.0730833	SB	No		retinol-binding protein pinta-like	LOC105199327	-1.51556	Sb	Yes		pre-mRNA-splicing factor Slu7	LOC105202812	3.93272	SB	Yes
	interleukin enhancer-binding factor 2	LOC105193124	-0.403469	Sb	No		retinol-binding protein pinta-like	LOC105199330	-1.59751	Sb	Yes		aldose reductase	LOC105203029	-2.07397	Sb	Yes
	uncharacterized LOC105193126	LOC105193126	-0.420414	Sb	No		uncharacterized LOC105199332	LOC105199332	1.73161	SB	Yes		calcium-independent phospholipase A2-gamma	LOC105203065	1.56594	SB	Yes
	neuronal acetylcholine receptor subunit alpha-7	LOC105193139	0.397454	SB	No		ejaculatory bulb-specific protein 3	LOC105199531	1.34293	SB	Yes		uncharacterized LOC105204969	LOC105204969	1.21815	SB	Yes
	segmentation protein capncollar	LOC105193215	-0.578737	Sb	No		uncharacterized LOC105199756	LOC105199756	3.03074	SB	Yes		uncharacterized LOC105207492	LOC105207492	1.30044	SB	Yes
	uncharacterized LOC105193220	LOC105193220	0.654036	SB	No		cytochrome P450 4C1	LOC105199861	-2.32667	Sb	Yes		tektin-3-like	LOC105193110	0.12615	SB	No
	uncharacterized LOC105193222	LOC105193222	-0.26162	Sb	No		pre-mRNA-splicing factor Slu7	LOC105202812	4.53578	SB	Yes		heparanase-like	LOC105193112	-0.198769	Sb	No
	prominin-2	LOC105193227	-0.600411	Sb	No		uncharacterized LOC105202816	LOC105202816	2.88453	SB	Yes		uncharacterized LOC105193113	LOC105193113	-0.205937	Sb	No
	trafficking protein particle complex subunit 1	LOC105193228	0.315712	SB	No		pheromone-binding protein Gp-9	LOC105202823	2.9355	SB	Yes		bromodomain-containing protein 8	LOC105193114	-0.695546	Sb	No
	uncharacterized oxidoreductase dhs-27	LOC105193229	-0.0696754	Sb	No		calcium-independent phospholipase A2-gamma	LOC105203065	1.97802	SB	Yes		tetraspanin-33	LOC105193116	0.00894032	SB	No
	E3 ubiquitin-protein ligase RNF19A	LOC105193230	-0.00351356	Sb	No		uncharacterized LOC105203078	LOC105203078	2.38209	SB	Yes		AN1-type zinc finger protein 1	LOC105193117	0.192543	SB	No
	uncharacterized LOC105193812	LOC105193812	0.21088	SB	No		cytochrome P450 4C1-like	LOC105203086	-2.94444	Sb	Yes		mediator of RNA polymerase II transcription subunit 28	LOC105193118	0.0697463	SB	No
	protein PTCD3 homolog, mitochondrial	LOC105193815	0.36179	SB	No		histone-binding protein N1/N2-like	LOC105203091	0.591709	SB	Yes		E3 ubiquitin-protein ligase RFWD2-like	LOC105193119	0.3354	SB	No
	signal transducer and activator of transcription 5B	LOC105193817	0.362333	SB	No		uncharacterized LOC105204969	LOC105204969	1.76811	SB	Yes		E3 ubiquitin-protein ligase COP1-like	LOC105193120	0.438491	SB	No
	uncharacterized LOC105193818	LOC105193818	-0.609725	Sb	No		uncharacterized LOC105207492	LOC105207492	1.18511	SB	Yes		F-box/LRR-repeat protein 7	LOC105193121	-0.454264	Sb	No
	phosphatidylinositol 4-kinase type 2-alpha	LOC105193819	0.220857	SB	No		heparanase-like	LOC105193112	-0.140053	Sb	No		calmodulin-like protein 4	LOC105193122	-0.211539	Sb	No
	uncharacterized LOC105193822	LOC105193822	-0.0335019	Sb	No		uncharacterized LOC105193113	LOC105193113	-0.133531	Sb	No		uncharacterized LOC105193123	LOC105193123	0.81553	SB	No
	RNA-binding protein Musashi homolog 2	LOC105193823	0.293668	SB	No		bromodomain-containing protein 8	LOC105193114	-0.127699	Sb	No		interleukin enhancer-binding factor 2	LOC105193124	0.100194	SB	No
	beta-TrCP	LOC105193827	-0.0680061	Sb	No		tetraspanin-33	LOC105193116	0.156224	SB	No		uncharacterized LOC105193126	LOC105193126	0.0363298	SB	No
	crossover junction endonuclease EME1	LOC105193829	-0.114456	Sb	No		AN1-type zinc finger protein 1	LOC105193117	-0.125795	Sb	No		serine protease persephone-like	LOC105193128	0.1825	SB	No
	KAT8 regulatory NSL complex subunit 3	LOC105193830	-0.674806	Sb	No		mediator of RNA polymerase II transcription subunit 28	LOC105193118	0.0648331	SB	No		serine protease persephone-like	LOC105193129	-0.191515	Sb	No
	uncharacterized LOC105193832	LOC105193832	-0.670853	Sb	No		E3 ubiquitin-protein ligase RFWD2-like	LOC105193119	0.601011	SB	No		venom serine protease Bi-VSP-like	LOC105193130	0.361694	SB	No
	phosphoglycerate mutase 2	LOC105193833	-0.50235	Sb	No		E3 ubiquitin-protein ligase COP1-like	LOC105193120	0.707501	SB	No		protein phosphatase 1 regulatory subunit 3C-B	LOC105193131	0.285797	SB	No
	ras-related protein Rab-24	LOC105193834	0.172415	SB	No		F-box/LRR-repeat protein 7	LOC105193121	0.286338	SB	No		tankyrase	LOC105193132	-0.0862372	Sb	No
	major facilitator superfamily domain-containing protein 6-A	LOC105193870	0.464413	SB	No		calmodulin-like protein 4	LOC105193122	-0.230672	Sb	No		carbohydrate sulfotransferase 11-like	LOC105193134	0.186811	SB	No
	SWI/SNF complex subunit SMARCC2	LOC105193871	-0.227262	Sb	No		uncharacterized LOC105193123	LOC105193123	0.394083	SB	No		uncharacterized LOC105193135	LOC105193135	-0.18838	Sb	No
	tRNA pseudouridine synthase A	LOC105194381	-0.0830412	Sb	No		interleukin enhancer-binding factor 2	LOC105193124	-0.00394213	Sb	No		potassium/sodium hyperpolarization-activated cyclic nucleotide-gated channel 2	LOC105193137	0.194693	SB	No
	charged multivesicular body protein 7	LOC105194453	-0.291494	Sb	No		uncharacterized LOC105193126	LOC105193126	-0.409543	Sb	No		neuronal acetylcholine receptor subunit alpha-7	LOC105193139	-0.071128	Sb	No
	pheromone-binding protein Gp-9	LOC105194481	-0.446369	Sb	No		serine protease persephone-like	LOC105193129	-0.534215	Sb	No		disintegrin and metalloproteinase domain-containing protein 10	LOC105193142	-0.071128	Sb	No
	protein slit	LOC105194510	-0.689359	Sb	No		protein phosphatase 1 regulatory subunit 3C-B	LOC105193131	0.271152	SB	No		serine protease persephone-like	LOC105193144	0.79393	SB	No
	SEC23-interacting protein	LOC105194585	-0.0327786	Sb	No		tankyrase	LOC105193132	-0.65222	Sb	No		venom protease-like	LOC105193145	-0.570337	Sb	No
	nucleolysin TIAR	LOC105194616	-0.0761748	Sb	No		uncharacterized LOC105193135	LOC105193135	-0.99585	Sb	No		ATP-dependent RNA helicase vasa	LOC105193214	-0.408537	Sb	No
	heat shock 70 kDa protein cognate 5	LOC105194672	0.200463	SB	No		potassium/sodium hyperpolarization-activated cyclic nucleotide-gated channel 2	LOC105193137	1.00183	SB	No		segmentation protein capncollar	LOC105193215	0	Sb	No
	protein farnesyltransferase/geranylgeranyltransferase type-1 subunit alpha	LOC105194675	0.112344	SB	No		neuronal acetylcholine receptor subunit alpha-7	LOC105193139	5.00535e-17	SB	No		endoplasmic reticulum aminopeptidase 1	LOC105193216	0.0414321	SB	No
	Kv channel-interacting protein 4-like	LOC105194700	0.892522	SB	No		disintegrin and metalloproteinase domain-containing protein 10	LOC105193142	0.823603	SB	No		integrin beta-like protein 1	LOC105193218	0.157713	SB	No
	fibroblast growth factor 17	LOC105194738	0.144575	SB	No		venom protease-like	LOC105193145	-0.0255212	Sb	No		uncharacterized LOC105193219	LOC105193219	-0.375196	Sb	No
	RNA/RNP complex-1-interacting phosphatase	LOC105194763	-0.459781	Sb	No		ATP-dependent RNA helicase vasa	LOC105193214	-0.0650906	Sb	No		uncharacterized LOC105193220	LOC105193220	-0.464583	Sb	No
	probable JmjC domain-containing histone demethylation protein 2C	LOC105195673	-0.477443	Sb	No		segmentation protein capncollar	LOC105193215	0.0182045	SB	No		uncharacterized LOC105193222	LOC105193222	-0.106768	Sb	No
	putative leucine-rich repeat-containing protein DDB_G0290503	LOC105195681	-0.238819	Sb	No		endoplasmic reticulum aminopeptidase 1	LOC105193216	-2.00214e-16	Sb	No		ferrochelatase, mitochondrial	LOC105193223	-0.141437	Sb	No
	conserved oligomeric Golgi complex subunit 7	LOC105195701	0.0342501	SB	No		high affinity copper uptake protein 1	LOC105193217	0.174317	SB	No		EEF1A lysine methyltransferase 2	LOC105193224	-0.0284267	Sb	No
	uncharacterized LOC105195710	LOC105195710	-0.070473	Sb	No		integrin beta-like protein 1	LOC105193218	-0.0698901	Sb	No		leishmanolysin-like peptidase	LOC105193225	-0.388589	Sb	No
	biorientation of chromosomes in cell division protein 1-like 1	LOC105195789	-0.417424	Sb	No		uncharacterized LOC105193219	LOC105193219	-0.407703	Sb	No		trace amine-associated receptor 9	LOC105193226	0.195324	SB	No
	protein O-GlcNAcase	LOC105196907	0.278288	SB	No		uncharacterized LOC105193220	LOC105193220	-0.164552	Sb	No		prominin-2	LOC105193227	0.150727	SB	No
	esterase FE4-like	LOC105199287	0.0830038	SB	No		uncharacterized LOC105193222	LOC105193222	0.0541755	SB	No		trafficking protein particle complex subunit 1	LOC105193228	0.84547	SB	No
	retinol dehydrogenase 14	LOC105199288	-0.0601261	Sb	No		ferrochelatase, mitochondrial	LOC105193223	-0.172857	Sb	No		uncharacterized oxidoreductase dhs-27	LOC105193229	-0.455262	Sb	No
	melanotransferrin	LOC105199292	0.045542	SB	No		EEF1A lysine methyltransferase 2	LOC105193224	0.0322003	SB	No		E3 ubiquitin-protein ligase RNF19A	LOC105193230	-0.428872	Sb	No
	X-ray repair cross-complementing protein 5	LOC105199293	-0.544803	Sb	No		leishmanolysin-like peptidase	LOC105193225	-1.17369	Sb	No		dihydroorotate dehydrogenase (quinone)	LOC105193231	-0.123706	Sb	No
	uncharacterized LOC105199297	LOC105199297	0.221633	SB	No		trace amine-associated receptor 9	LOC105193226	0.538922	SB	No		insulin-like growth factor-binding protein-related protein 1	LOC105193233	0.129548	SB	No
	stress response protein NST1	LOC105199299	-0.384612	Sb	No		prominin-2	LOC105193227	0.385353	SB	No		uncharacterized LOC105193804	LOC105193804	0.581012	SB	No
	trichohyalin	LOC105199302	0.284089	SB	No		trafficking protein particle complex subunit 1	LOC105193228	0.400969	SB	No		isoaspartyl peptidase/L-asparaginase-like	LOC105193806	-0.100685	Sb	No
	transcription initiation protein SPT3 homolog	LOC105199303	0.0376442	SB	No		uncharacterized oxidoreductase dhs-27	LOC105193229	-0.101461	Sb	No		transferrin	LOC105193807	-0.463219	Sb	No
	WD repeat-containing protein 91	LOC105199304	0.334554	SB	No		E3 ubiquitin-protein ligase RNF19A	LOC105193230	-0.178477	Sb	No		WD repeat-containing protein 60	LOC105193808	0.150549	SB	No
	major facilitator superfamily domain-containing protein 6	LOC105199307	0.244411	SB	No		dihydroorotate dehydrogenase (quinone)	LOC105193231	0.328631	SB	No		cell death specification protein 2	LOC105193811	-0.68286	Sb	No
	cytoplasmic aconitate hydratase	LOC105199309	0.427799	SB	No		uncharacterized LOC105193804	LOC105193804	-0.0300787	Sb	No		uncharacterized LOC105193812	LOC105193812	0.727747	SB	No
	F-box/WD repeat-containing protein 4	LOC105199310	-0.299329	Sb	No		isoaspartyl peptidase/L-asparaginase-like	LOC105193806	0.566406	SB	No		uncharacterized LOC105193814	LOC105193814	-0.0781322	Sb	No
	protein RFT1 homolog	LOC105199311	-0.246399	Sb	No		transferrin	LOC105193807	-0.0801635	Sb	No		protein PTCD3 homolog, mitochondrial	LOC105193815	-0.0094404	Sb	No
	uncharacterized LOC105199313	LOC105199313	-0.0814968	Sb	No		WD repeat-containing protein 60	LOC105193808	0.167543	SB	No		major facilitator superfamily domain-containing protein 10	LOC105193816	0.658407	SB	No
	pantothenate kinase 1	LOC105199314	0.357685	SB	No		cell death specification protein 2	LOC105193811	-1.77912	Sb	No		signal transducer and activator of transcription 5B	LOC105193817	0.36178	SB	No
	uncharacterized LOC105199317	LOC105199317	-0.120303	Sb	No		uncharacterized LOC105193812	LOC105193812	0.591736	SB	No		uncharacterized LOC105193818	LOC105193818	0	Sb	No
	uncharacterized LOC105199320	LOC105199320	-0.0758259	Sb	No		uncharacterized LOC105193814	LOC105193814	-0.188238	Sb	No		phosphatidylinositol 4-kinase type 2-alpha	LOC105193819	-0.258002	Sb	No
	ABC transporter G family member 23	LOC105199322	0.438964	SB	No		protein PTCD3 homolog, mitochondrial	LOC105193815	0.224386	SB	No		39S ribosomal protein L51, mitochondrial	LOC105193820	0.23458	SB	No
	retinol-binding protein pinta-like	LOC105199327	-0.540904	Sb	No		major facilitator superfamily domain-containing protein 10	LOC105193816	0.187642	SB	No		dipeptidyl peptidase 9	LOC105193821	0.132457	SB	No
	retinol-binding protein pinta-like	LOC105199329	-0.16766	Sb	No		signal transducer and activator of transcription 5B	LOC105193817	-0.0995575	Sb	No		uncharacterized LOC105193822	LOC105193822	0.537753	SB	No
	serine/arginine-rich splicing factor 1A	LOC105199338	-0.205256	Sb	No		uncharacterized LOC105193818	LOC105193818	0.183197	SB	No		RNA-binding protein Musashi homolog 2	LOC105193823	0	Sb	No
	N-acetyl-D-glucosamine kinase	LOC105199342	-0.327086	Sb	No		phosphatidylinositol 4-kinase type 2-alpha	LOC105193819	0.0126535	SB	No		fibrillin-1	LOC105193824	-0.578126	Sb	No
	uncharacterized LOC105199343	LOC105199343	-0.0817334	Sb	No		39S ribosomal protein L51, mitochondrial	LOC105193820	-0.00556176	Sb	No		uncharacterized LOC105193825	LOC105193825	-0.645283	Sb	No
	Y+L amino acid transporter 2	LOC105199346	-0.101048	Sb	No		dipeptidyl peptidase 9	LOC105193821	0.122242	SB	No		exportin-7	LOC105193826	-0.443647	Sb	No
	golgin subfamily A member 7	LOC105199351	-0.240677	Sb	No		uncharacterized LOC105193822	LOC105193822	1.33739	SB	No		beta-TrCP	LOC105193827	0.160688	SB	No
	MAP kinase-activating death domain protein	LOC105199355	0.144998	SB	No		RNA-binding protein Musashi homolog 2	LOC105193823	-0.183197	Sb	No		phospholipid phosphatase 5	LOC105193828	-0.124855	Sb	No
	vacuolar protein sorting-associated protein 13B	LOC105199580	-0.478183	Sb	No		fibrillin-1	LOC105193824	-0.7262	Sb	No		crossover junction endonuclease EME1	LOC105193829	0.563368	SB	No
	exonuclease 3-5 domain-containing protein 2	LOC105199719	-0.233205	Sb	No		exportin-7	LOC105193826	0.133847	SB	No		KAT8 regulatory NSL complex subunit 3	LOC105193830	0.370031	SB	No
	octopamine receptor Oamb	LOC105199739	-0.488378	Sb	No		beta-TrCP	LOC105193827	0.301538	SB	No		uncharacterized LOC105193832	LOC105193832	-1.22339	Sb	No
	uncharacterized LOC105199756	LOC105199756	0.293189	SB	No		phospholipid phosphatase 5	LOC105193828	0.103628	SB	No		phosphoglycerate mutase 2	LOC105193833	0.131989	SB	No
	serine protease HTRA2, mitochondrial	LOC105199767	-0.202748	Sb	No		crossover junction endonuclease EME1	LOC105193829	0.265226	SB	No		ras-related protein Rab-24	LOC105193834	0.803033	SB	No
	ornithine aminotransferase, mitochondrial-like	LOC105201526	0.416585	SB	No		KAT8 regulatory NSL complex subunit 3	LOC105193830	0.181252	SB	No		S-adenosylmethionine mitochondrial carrier protein	LOC105193835	0.216396	SB	No
	activin receptor type-2A-like	LOC105201534	0.145156	SB	No		uncharacterized LOC105193832	LOC105193832	-0.689021	Sb	No		uncharacterized LOC105193836	LOC105193836	-0.752696	Sb	No
	complexin	LOC105201535	0.169171	SB	No		phosphoglycerate mutase 2	LOC105193833	0.13659	SB	No		ELMO domain-containing protein 2	LOC105193837	0.120301	SB	No
	uncharacterized protein MAL13P1.304-like	LOC105201536	-0.534253	Sb	No		ras-related protein Rab-24	LOC105193834	-0.0815668	Sb	No		uncharacterized protein C3orf18-like	LOC105193839	-0.178369	Sb	No
	uncharacterized LOC105202814	LOC105202814	0.17871	SB	No		S-adenosylmethionine mitochondrial carrier protein	LOC105193835	0.20382	SB	No		major facilitator superfamily domain-containing protein 6-A	LOC105193870	0.181957	SB	No
	pheromone-binding protein Gp-9	LOC105202824	-0.512185	Sb	No		ELMO domain-containing protein 2	LOC105193837	0.432698	SB	No		SWI/SNF complex subunit SMARCC2	LOC105193871	-0.169064	Sb	No
	PH domain-containing protein DDB_G0287875-like	LOC105203035	-0.295278	Sb	No		uncharacterized protein C3orf18-like	LOC105193839	-0.248364	Sb	No		uncharacterized protein DDB_G0272420	LOC105193872	-0.674649	Sb	No
	hexokinase type 2-like	LOC105203037	0.0120991	SB	No		SWI/SNF complex subunit SMARCC2	LOC105193871	0.168654	SB	No		glucose dehydrogenase [FAD, quinone]	LOC105193873	-0.150297	Sb	No
	BRISC complex subunit FAM175B	LOC105203038	0.361677	SB	No		uncharacterized protein DDB_G0272420	LOC105193872	-0.901698	Sb	No		tRNA pseudouridine synthase A	LOC105194381	-0.821321	Sb	No
	Hermansky-Pudlak syndrome 1 protein homolog	LOC105203039	0.2284	SB	No		glucose dehydrogenase [FAD, quinone]	LOC105193873	-0.0204759	Sb	No		probable 39S ribosomal protein L45, mitochondrial	LOC105194416	-0.397787	Sb	No
	max dimerization protein 1	LOC105203041	-0.476604	Sb	No		tRNA pseudouridine synthase A	LOC105194381	-0.404912	Sb	No		modular serine protease-like	LOC105194441	-0.801382	Sb	No
	huntingtin	LOC105203053	0.392938	SB	No		probable 39S ribosomal protein L45, mitochondrial	LOC105194416	-0.155467	Sb	No		charged multivesicular body protein 7	LOC105194453	-0.397176	Sb	No
	uncharacterized LOC105203058	LOC105203058	0.681143	SB	No		modular serine protease-like	LOC105194425	1.71492	SB	No		flap endonuclease GEN	LOC105194461	0.0101523	SB	No
	microtubule-associated protein futsch	LOC105203059	-0.163997	Sb	No		modular serine protease-like	LOC105194441	-1.43136	Sb	No		tyramine receptor 1	LOC105194469	1.86281e-16	SB	No
	m7GpppN-mRNA hydrolase	LOC105203061	-0.417715	Sb	No		charged multivesicular body protein 7	LOC105194453	-0.018636	Sb	No		pheromone-binding protein Gp-9	LOC105194487	0.874635	SB	No
	60S ribosomal protein L29-1	LOC105203064	0.270684	SB	No		flap endonuclease GEN	LOC105194461	-0.0979829	Sb	No		pheromone-binding protein Gp-9	LOC105194495	-0.681651	Sb	No
	calcium-independent phospholipase A2-gamma	LOC105203065	-0.465903	Sb	No		pheromone-binding protein Gp-9	LOC105194487	0.317789	SB	No		pheromone-binding protein Gp-9-like	LOC105194501	-0.424744	Sb	No
	atrial natriuretic peptide receptor 1	LOC105203066	-0.0683576	Sb	No		pheromone-binding protein Gp-9	LOC105194495	-1.10704	Sb	No		protein slit	LOC105194510	0	Sb	No
	uncharacterized LOC105203069	LOC105203069	0.404439	SB	No		protein slit	LOC105194510	0.385353	SB	No		protein unc-13 homolog 4B	LOC105194522	0.434119	SB	No
	sorting nexin-27	LOC105203072	-0.288607	Sb	No		protein unc-13 homolog 4B	LOC105194522	0.0750934	SB	No		SEC23-interacting protein	LOC105194585	-0.267047	Sb	No
	fumarylacetoacetate hydrolase domain-containing protein 2A	LOC105203075	0.514313	SB	No		SEC23-interacting protein	LOC105194585	0.059433	SB	No		uncharacterized LOC105194601	LOC105194601	0.195343	SB	No
	atrial natriuretic peptide receptor 1	LOC105203079	-0.107906	Sb	No		uncharacterized LOC105194601	LOC105194601	1.05675	SB	No		peritrophin-1-like	LOC105194610	1.16301	SB	No
	semaphorin-5B	LOC105203081	0.432808	SB	No		nucleolysin TIAR	LOC105194616	-0.201151	Sb	No		nucleolysin TIAR	LOC105194616	-0.150727	Sb	No
	cytochrome P450 4C1-like	LOC105203087	-0.0551103	Sb	No		U4/U6 small nuclear ribonucleoprotein Prp3	LOC105194663	-0.372931	Sb	No		U4/U6 small nuclear ribonucleoprotein Prp3	LOC105194663	-0.212565	Sb	No
	aldose reductase-like	LOC105203090	0.344991	SB	No		heat shock 70 kDa protein cognate 5	LOC105194672	-0.122249	Sb	No		heat shock 70 kDa protein cognate 5	LOC105194672	-0.0360813	Sb	No
	uncharacterized LOC105203092	LOC105203092	-0.256171	Sb	No		protein farnesyltransferase/geranylgeranyltransferase type-1 subunit alpha	LOC105194675	0.110106	SB	No		protein farnesyltransferase/geranylgeranyltransferase type-1 subunit alpha	LOC105194675	-0.0742294	Sb	No
	vesicular integral-membrane protein VIP36	LOC105206540	-0.287984	Sb	No		uncharacterized LOC105194680	LOC105194680	0.283295	SB	No		uncharacterized LOC105194680	LOC105194680	0.0440407	SB	No
	wolframin	LOC105206549	0.278586	SB	No		uncharacterized LOC105194690	LOC105194690	0.709006	SB	No		uncharacterized LOC105194690	LOC105194690	0.469661	SB	No
	uncharacterized LOC105206574	LOC105206574	-0.0951428	Sb	No		Kv channel-interacting protein 4-like	LOC105194700	-0.282381	Sb	No		Kv channel-interacting protein 4-like	LOC105194700	-0.195324	Sb	No
	uncharacterized LOC105206612	LOC105206612	1.0217	SB	No		fibroblast growth factor 17	LOC105194738	-0.134624	Sb	No		transcription factor collier	LOC105194727	-0.128738	Sb	No
	cilia- and flagella-associated protein 206	LOC105206630	0.165651	SB	No		RNA/RNP complex-1-interacting phosphatase	LOC105194763	-0.0621783	Sb	No		fibroblast growth factor 17	LOC105194738	-0.150727	Sb	No
	uncharacterized LOC105206689	LOC105206689	0.0901222	SB	No		NADH dehydrogenase [ubiquinone] 1 alpha subcomplex subunit 9, mitochondrial-like	LOC105194795	-0.319601	Sb	No		RNA/RNP complex-1-interacting phosphatase	LOC105194763	0.301144	SB	No
	probable JmjC domain-containing histone demethylation protein 2C	LOC105207370	0.228486	SB	No		limulus clotting factor C-like	LOC105194836	0.521156	SB	No		protein DPCD	LOC105194770	0.648599	SB	No
	cell division cycle protein 16 homolog	LOC105207396	-0.383607	Sb	No		uncharacterized LOC105194855	LOC105194855	0.00262811	SB	No		NADH dehydrogenase [ubiquinone] 1 alpha subcomplex subunit 9, mitochondrial-like	LOC105194795	0.00929303	SB	No
	peroxisomal membrane protein 11C	LOC105207412	-0.328731	Sb	No		chorion peroxidase-like	LOC105194878	-0.173501	Sb	No		limulus clotting factor C-like	LOC105194836	0.750833	SB	No
	cytoplasmic polyadenylation element-binding protein 2	LOC105207423	-0.166506	Sb	No		uncharacterized LOC105194887	LOC105194887	0.0178358	SB	No		cytochrome P450 4c21-like	LOC105194845	0.298617	SB	No
							probable JmjC domain-containing histone demethylation protein 2C	LOC105195673	-2.10225e-16	Sb	No		uncharacterized LOC105194855	LOC105194855	-0.195324	Sb	No
							putative leucine-rich repeat-containing protein DDB_G0290503	LOC105195681	0.214998	SB	No		chorion peroxidase-like	LOC105194878	0.363559	SB	No
							conserved oligomeric Golgi complex subunit 7	LOC105195701	0.0826962	SB	No		uncharacterized LOC105194887	LOC105194887	-0.0599045	Sb	No
							uncharacterized LOC105195710	LOC105195710	-0.385353	Sb	No		probable JmjC domain-containing histone demethylation protein 2C	LOC105195673	0.12615	SB	No
							nanos homolog 3	LOC105195720	-0.421356	Sb	No		putative leucine-rich repeat-containing protein DDB_G0290503	LOC105195681	-0.221361	Sb	No
							phenoloxidase-activating factor 2-like	LOC105195733	-0.782024	Sb	No		conserved oligomeric Golgi complex subunit 7	LOC105195701	0.288367	SB	No
							mitoferrin-2	LOC105195750	0.332831	SB	No		uncharacterized LOC105195710	LOC105195710	-1.00107e-16	Sb	No
							uncharacterized LOC105195766	LOC105195766	0.0466097	SB	No		nanos homolog 3	LOC105195720	-0.0743352	Sb	No
							ejaculatory bulb-specific protein 3	LOC105195772	-0.25291	Sb	No		phenoloxidase-activating factor 2-like	LOC105195733	0.014355	SB	No
							ATP-dependent RNA helicase SUV3 homolog, mitochondrial	LOC105195781	-0.857725	Sb	No		mitoferrin-2	LOC105195750	0.378758	SB	No
							biorientation of chromosomes in cell division protein 1-like 1	LOC105195789	-0.135407	Sb	No		uncharacterized LOC105195766	LOC105195766	0.0989715	SB	No
							glycerol-3-phosphate acyltransferase 1, mitochondrial	LOC105195797	-0.0186035	Sb	No		ejaculatory bulb-specific protein 3	LOC105195772	0.292119	SB	No
							meiosis-specific nuclear structural protein 1	LOC105195859	0.770574	SB	No		ATP-dependent RNA helicase SUV3 homolog, mitochondrial	LOC105195781	-0.727742	Sb	No
							tyrosine-protein kinase transmembrane receptor Ror	LOC105196903	-0.207519	Sb	No		biorientation of chromosomes in cell division protein 1-like 1	LOC105195789	-0.123172	Sb	No
							uncharacterized LOC105196904	LOC105196904	-0.259989	Sb	No		glycerol-3-phosphate acyltransferase 1, mitochondrial	LOC105195797	0.594124	SB	No
							protein O-GlcNAcase	LOC105196907	0.23564	SB	No		nanos homolog 3-like	LOC105195826	-0.0372052	Sb	No
							tyrosine-protein kinase transmembrane receptor ROR1-like	LOC105196908	0	Sb	No		meiosis-specific nuclear structural protein 1	LOC105195859	0.0367908	SB	No
							transcription elongation factor SPT5	LOC105196909	-0.0767908	Sb	No		tyrosine-protein kinase transmembrane receptor Ror	LOC105196903	0.0791491	SB	No
							leucine-rich repeat and death domain-containing protein 1	LOC105196910	0.250185	SB	No		uncharacterized LOC105196904	LOC105196904	0.0206141	SB	No
							esterase FE4-like	LOC105199287	-0.595208	Sb	No		protein O-GlcNAcase	LOC105196907	-0.542083	Sb	No
							retinol dehydrogenase 14	LOC105199288	-0.992796	Sb	No		tyrosine-protein kinase transmembrane receptor ROR1-like	LOC105196908	-0.150727	Sb	No
							sperm flagellar protein 1	LOC105199289	-0.930154	Sb	No		transcription elongation factor SPT5	LOC105196909	0.199396	SB	No
							proteasome subunit alpha type-2	LOC105199290	-0.90541	Sb	No		leucine-rich repeat and death domain-containing protein 1	LOC105196910	0.29334	SB	No
							melanotransferrin	LOC105199292	-0.00574916	Sb	No		esterase FE4-like	LOC105199287	-0.632002	Sb	No
							X-ray repair cross-complementing protein 5	LOC105199293	-0.565341	Sb	No		retinol dehydrogenase 14	LOC105199288	-0.988847	Sb	No
							beta-1,4-galactosyltransferase 7	LOC105199296	0.389222	SB	No		sperm flagellar protein 1	LOC105199289	-1.01063	Sb	No
							uncharacterized LOC105199297	LOC105199297	-0.273594	Sb	No		proteasome subunit alpha type-2	LOC105199290	-0.832482	Sb	No
							pickpocket protein 28	LOC105199298	-0.354185	Sb	No		melanotransferrin	LOC105199292	0.149265	SB	No
							stress response protein NST1	LOC105199299	-0.370101	Sb	No		X-ray repair cross-complementing protein 5	LOC105199293	-0.311973	Sb	No
							uncharacterized LOC105199300	LOC105199300	0.1487	SB	No		beta-1,4-galactosyltransferase 7	LOC105199296	0.756879	SB	No
							trichohyalin	LOC105199302	0.2193	SB	No		uncharacterized LOC105199297	LOC105199297	0.067647	SB	No
							transcription initiation protein SPT3 homolog	LOC105199303	0.111231	SB	No		pickpocket protein 28	LOC105199298	-0.411186	Sb	No
							WD repeat-containing protein 91	LOC105199304	0.309761	SB	No		stress response protein NST1	LOC105199299	-0.391519	Sb	No
							homeotic protein empty spiracles	LOC105199305	0.471996	SB	No		uncharacterized LOC105199300	LOC105199300	0.20828	SB	No
							major facilitator superfamily domain-containing protein 6	LOC105199307	0.407424	SB	No		trichohyalin	LOC105199302	0.146858	SB	No
							cytoplasmic aconitate hydratase	LOC105199309	0.226501	SB	No		transcription initiation protein SPT3 homolog	LOC105199303	0.0422395	SB	No
							F-box/WD repeat-containing protein 4	LOC105199310	-0.606172	Sb	No		WD repeat-containing protein 91	LOC105199304	0.0762372	SB	No
							protein RFT1 homolog	LOC105199311	-0.26514	Sb	No		homeotic protein empty spiracles	LOC105199305	-0.55705	Sb	No
							uncharacterized LOC105199313	LOC105199313	0.215638	SB	No		major facilitator superfamily domain-containing protein 6	LOC105199307	-0.185347	Sb	No
							pantothenate kinase 1	LOC105199314	0.18442	SB	No		cytoplasmic aconitate hydratase	LOC105199309	-0.147447	Sb	No
							uncharacterized LOC105199317	LOC105199317	-0.326396	Sb	No		F-box/WD repeat-containing protein 4	LOC105199310	-0.58097	Sb	No
							erythroid differentiation-related factor 1	LOC105199318	0.37931	SB	No		protein RFT1 homolog	LOC105199311	-0.189098	Sb	No
							arrestin homolog	LOC105199319	0.0557998	SB	No		uncharacterized LOC105199313	LOC105199313	-0.121862	Sb	No
							uncharacterized LOC105199320	LOC105199320	-0.513723	Sb	No		pantothenate kinase 1	LOC105199314	-0.963766	Sb	No
							copper homeostasis protein cutC homolog	LOC105199321	1.7042	SB	No		galactoside 2-alpha-L-fucosyltransferase 2-like	LOC105199316	-0.475177	Sb	No
							ABC transporter G family member 23	LOC105199322	0.891519	SB	No		uncharacterized LOC105199317	LOC105199317	-0.280173	Sb	No
							retinol-binding protein pinta	LOC105199323	-0.897025	Sb	No		erythroid differentiation-related factor 1	LOC105199318	0.296635	SB	No
							retinol-binding protein pinta-like	LOC105199326	0.298032	SB	No		arrestin homolog	LOC105199319	-0.208896	Sb	No
							retinol-binding protein pinta	LOC105199328	0.519126	SB	No		uncharacterized LOC105199320	LOC105199320	-0.106808	Sb	No
							retinol-binding protein pinta-like	LOC105199329	-0.321657	Sb	No		ABC transporter G family member 23	LOC105199322	0.256823	SB	No
							BCL2/adenovirus E1B 19 kDa protein-interacting protein 3	LOC105199334	0.398924	SB	No		retinol-binding protein pinta	LOC105199323	-0.576237	Sb	No
							kinesin-like protein KIF9	LOC105199335	-0.318487	Sb	No		retinol-binding protein pinta	LOC105199325	-0.917728	Sb	No
							polyadenylate-binding protein-interacting protein 2	LOC105199336	-0.0734739	Sb	No		retinol-binding protein pinta-like	LOC105199326	0.587899	SB	No
							catenin alpha	LOC105199337	0.105512	SB	No		retinol-binding protein pinta-like	LOC105199327	-0.143387	Sb	No
							serine/arginine-rich splicing factor 1A	LOC105199338	0.402464	SB	No		retinol-binding protein pinta	LOC105199328	0.374653	SB	No
							cholinephosphotransferase 1	LOC105199340	0.246312	SB	No		retinol-binding protein pinta-like	LOC105199329	-0.268637	Sb	No
							39S ribosomal protein L21, mitochondrial	LOC105199341	-0.243182	Sb	No		retinol-binding protein pinta-like	LOC105199330	-0.912638	Sb	No
							N-acetyl-D-glucosamine kinase	LOC105199342	0.5131	SB	No		uncharacterized LOC105199332	LOC105199332	0.754663	SB	No
							uncharacterized LOC105199343	LOC105199343	0.259571	SB	No		BCL2/adenovirus E1B 19 kDa protein-interacting protein 3	LOC105199334	0	Sb	No
							glutaredoxin-3	LOC105199345	0.79455	SB	No		kinesin-like protein KIF9	LOC105199335	-0.0494044	Sb	No
							Y+L amino acid transporter 2	LOC105199346	0.326396	SB	No		polyadenylate-binding protein-interacting protein 2	LOC105199336	0.024553	SB	No
							lysyl oxidase homolog 3	LOC105199348	-0.522948	Sb	No		catenin alpha	LOC105199337	0.287946	SB	No
							G protein-coupled receptor kinase 5	LOC105199349	-0.127103	Sb	No		serine/arginine-rich splicing factor 1A	LOC105199338	0.190612	SB	No
							golgin subfamily A member 7	LOC105199351	-0.0675323	Sb	No		uncharacterized LOC105199339	LOC105199339	0.51318	SB	No
							farnesol dehydrogenase	LOC105199354	-0.130053	Sb	No		cholinephosphotransferase 1	LOC105199340	0.00695092	SB	No
							MAP kinase-activating death domain protein	LOC105199355	1.16861	SB	No		39S ribosomal protein L21, mitochondrial	LOC105199341	-1.09525	Sb	No
							serine/arginine repetitive matrix protein 1	LOC105199356	0.989667	SB	No		N-acetyl-D-glucosamine kinase	LOC105199342	0.541744	SB	No
							cGMP-specific 3,5-cyclic phosphodiesterase	LOC105199358	0.209762	SB	No		uncharacterized LOC105199343	LOC105199343	0.10053	SB	No
							uncharacterized LOC105199473	LOC105199473	-0.0921689	Sb	No		glutaredoxin-3	LOC105199345	0.587934	SB	No
							COMM domain-containing protein 4	LOC105199484	0.0366898	SB	No		Y+L amino acid transporter 2	LOC105199346	0.0128916	SB	No
							protein tincar	LOC105199492	-0.0956129	Sb	No		uncharacterized LOC105199347	LOC105199347	-6.00642e-17	Sb	No
							uncharacterized LOC105199549	LOC105199549	-0.412327	Sb	No		lysyl oxidase homolog 3	LOC105199348	0.454536	SB	No
							uncharacterized LOC105199559	LOC105199559	1.12828	SB	No		G protein-coupled receptor kinase 5	LOC105199349	-6.00642e-17	Sb	No
							RING finger protein 37	LOC105199565	0.46136	SB	No		synaptic vesicular amine transporter	LOC105199350	-0.0681972	Sb	No
							vacuolar protein sorting-associated protein 13B	LOC105199580	-0.385353	Sb	No		golgin subfamily A member 7	LOC105199351	0.132766	SB	No
							meiosis regulator and mRNA stability factor 1-like	LOC105199591	0.415885	SB	No		farnesol dehydrogenase	LOC105199354	-0.438585	Sb	No
							H/ACA ribonucleoprotein complex subunit 2-like protein	LOC105199601	-0.294905	Sb	No		MAP kinase-activating death domain protein	LOC105199355	0.348157	SB	No
							uncharacterized LOC105199609	LOC105199609	1.00107e-17	SB	No		serine/arginine repetitive matrix protein 1	LOC105199356	0.348157	SB	No
							rho-related BTB domain-containing protein 1	LOC105199617	-0.674325	Sb	No		cGMP-specific 3,5-cyclic phosphodiesterase	LOC105199358	0.207077	SB	No
							alpha-tocopherol transfer protein-like	LOC105199655	0.281953	SB	No		uncharacterized LOC105199473	LOC105199473	0.0802536	SB	No
							zinc finger protein 699	LOC105199708	0.445288	SB	No		COMM domain-containing protein 4	LOC105199484	6.60855e-17	SB	No
							exonuclease 3-5 domain-containing protein 2	LOC105199719	0.214423	SB	No		protein tincar	LOC105199492	-0.239083	Sb	No
							attractin-like protein 1	LOC105199727	-1.23586	Sb	No		uncharacterized LOC105199549	LOC105199549	-1.20128e-16	Sb	No
							octopamine receptor Oamb	LOC105199739	-1.17369	Sb	No		uncharacterized LOC105199559	LOC105199559	0.285691	SB	No
							facilitated trehalose transporter Tret1-like	LOC105199746	-0.0196041	Sb	No		RING finger protein 37	LOC105199565	0.609608	SB	No
							serine protease HTRA2, mitochondrial	LOC105199767	0.466364	SB	No		vacuolar protein sorting-associated protein 13B	LOC105199580	4.00428e-17	SB	No
							zinc finger CCHC domain-containing protein 4	LOC105199780	0.273768	SB	No		meiosis regulator and mRNA stability factor 1-like	LOC105199591	-0.102818	Sb	No
							phosphatidylinositide phosphatase SAC2	LOC105199786	-0.637704	Sb	No		H/ACA ribonucleoprotein complex subunit 2-like protein	LOC105199601	-0.269507	Sb	No
							NADH dehydrogenase [ubiquinone] 1 alpha subcomplex subunit 9, mitochondrial-like	LOC105199789	-1.26848	Sb	No		uncharacterized LOC105199609	LOC105199609	-0.114622	Sb	No
							ubiquitin-like domain-containing CTD phosphatase 1	LOC105199797	-0.16222	Sb	No		rho-related BTB domain-containing protein 1	LOC105199617	-0.287575	Sb	No
							peroxidase	LOC105199803	0.204698	SB	No		alpha-tocopherol transfer protein-like	LOC105199655	-0.060539	Sb	No
							coiled-coil domain-containing protein 142	LOC105199810	0.384272	SB	No		zinc finger protein 699	LOC105199708	0.0655981	SB	No
							dynein heavy chain 2, axonemal	LOC105199816	0.0301021	SB	No		exonuclease 3-5 domain-containing protein 2	LOC105199719	0.126146	SB	No
							dynein heavy chain 8, axonemal	LOC105199837	-0.441893	Sb	No		attractin-like protein 1	LOC105199727	1.80193e-16	SB	No
							uncharacterized LOC105199885	LOC105199885	-1.69818	Sb	No		octopamine receptor Oamb	LOC105199739	-0.376942	Sb	No
							neurophysin 1	LOC105199893	0.720732	SB	No		facilitated trehalose transporter Tret1-like	LOC105199746	-0.12946	Sb	No
							cytochrome P450 4V2-like	LOC105199901	0.544172	SB	No		uncharacterized LOC105199756	LOC105199756	0.3861	SB	No
							ornithine aminotransferase, mitochondrial	LOC105201519	-1.76883	Sb	No		serine protease HTRA2, mitochondrial	LOC105199767	-0.268676	Sb	No
							uncharacterized LOC105201520	LOC105201520	0.220643	SB	No		zinc finger CCHC domain-containing protein 4	LOC105199780	-0.0799135	Sb	No
							ornithine aminotransferase, mitochondrial-like	LOC105201521	0.625618	SB	No		phosphatidylinositide phosphatase SAC2	LOC105199786	-0.808141	Sb	No
							zinc finger protein 665	LOC105201523	-0.259946	Sb	No		ubiquitin-like domain-containing CTD phosphatase 1	LOC105199797	-0.637744	Sb	No
							ornithine aminotransferase, mitochondrial-like	LOC105201526	0.552049	SB	No		peroxidase	LOC105199803	-0.316049	Sb	No
							methyltransferase-like protein 25	LOC105201527	-0.121951	Sb	No		coiled-coil domain-containing protein 142	LOC105199810	-0.207113	Sb	No
							uncharacterized LOC105201528	LOC105201528	-0.235694	Sb	No		dynein heavy chain 2, axonemal	LOC105199816	-7.16291e-17	Sb	No
							hippocampus abundant transcript 1 protein	LOC105201529	0.011341	SB	No		uncharacterized LOC105199827	LOC105199827	0.0681972	SB	No
							pre-mRNA-splicing factor Slu7	LOC105201533	-0.252463	Sb	No		dynein heavy chain 8, axonemal	LOC105199837	-0.277963	Sb	No
							activin receptor type-2A-like	LOC105201534	-0.0424089	Sb	No		cytochrome P450 4C1	LOC105199870	-0.07806	Sb	No
							complexin	LOC105201535	-0.409543	Sb	No		uncharacterized LOC105199885	LOC105199885	-0.901454	Sb	No
							uncharacterized protein MAL13P1.304-like	LOC105201536	1.32578	SB	No		neurophysin 1	LOC105199893	0.194765	SB	No
							protein PFC0760c-like	LOC105201541	-2.00215e-17	Sb	No		uncharacterized LOC105199896	LOC105199896	-0.470689	Sb	No
							UDP-glucuronosyltransferase 1-9-like	LOC105202813	-0.359436	Sb	No		cytochrome P450 4V2-like	LOC105199901	0.299514	SB	No
							uncharacterized LOC105202814	LOC105202814	0	Sb	No		ornithine aminotransferase, mitochondrial	LOC105201519	-0.218888	Sb	No
							tachykinins	LOC105202817	1.55353	SB	No		uncharacterized LOC105201520	LOC105201520	-0.0138022	Sb	No
							cytochrome P450 4C1	LOC105202818	0.102321	SB	No		ornithine aminotransferase, mitochondrial-like	LOC105201521	0.469095	SB	No
							uncharacterized LOC105202820	LOC105202820	1.32062	SB	No		zinc finger protein 665	LOC105201523	-0.405081	Sb	No
							cytochrome P450 4C1-like	LOC105202821	-1.63198	Sb	No		TBC1 domain family member 7	LOC105201525	-0.34256	Sb	No
							cytochrome P450 4C1	LOC105202822	0.167543	SB	No		ornithine aminotransferase, mitochondrial-like	LOC105201526	0.334165	SB	No
							alpha-tocopherol transfer protein-like	LOC105202826	-0.837664	Sb	No		methyltransferase-like protein 25	LOC105201527	0.168229	SB	No
							UDP-glucuronosyltransferase 2B1-like	LOC105202831	-0.199317	Sb	No		uncharacterized LOC105201528	LOC105201528	-0.226528	Sb	No
							uncharacterized LOC105202832	LOC105202832	-0.182493	Sb	No		hippocampus abundant transcript 1 protein	LOC105201529	0.383222	SB	No
							cytochrome P450 4C1	LOC105202834	-0.0675378	Sb	No		serine/threonine-protein kinase WNK1	LOC105201530	-0.333271	Sb	No
							4-hydroxybutyrate coenzyme A transferase-like	LOC105203016	0.375967	SB	No		pre-mRNA-splicing factor Slu7	LOC105201533	-0.432394	Sb	No
							4-hydroxybutyrate coenzyme A transferase-like	LOC105203017	-0.12132	Sb	No		activin receptor type-2A-like	LOC105201534	-0.402424	Sb	No
							TGF-beta-activated kinase 1 and MAP3K7-binding protein 1	LOC105203018	-0.565937	Sb	No		complexin	LOC105201535	0.195324	SB	No
							V-type proton ATPase subunit B	LOC105203019	0.116684	SB	No		uncharacterized protein MAL13P1.304-like	LOC105201536	0.110554	SB	No
							DNA repair and recombination protein RAD54-like	LOC105203020	-0.136775	Sb	No		protein PFC0760c-like	LOC105201541	-0.267663	Sb	No
							serine/threonine-protein phosphatase 1 regulatory subunit 10	LOC105203021	-0.127562	Sb	No		epidermal growth factor receptor substrate 15-like 1	LOC105202480	-0.195343	Sb	No
							U6 snRNA-associated Sm-like protein LSm8	LOC105203023	-0.256196	Sb	No		uncharacterized LOC105202811	LOC105202811	-0.129926	Sb	No
							DE-cadherin	LOC105203024	-2.00214e-16	Sb	No		UDP-glucuronosyltransferase 1-9-like	LOC105202813	-0.225302	Sb	No
							tubby-related protein 4	LOC105203026	-0.156682	Sb	No		uncharacterized LOC105202814	LOC105202814	-0.185832	Sb	No
							sphingosine-1-phosphate lyase	LOC105203027	-0.304992	Sb	No		uncharacterized LOC105202816	LOC105202816	1.18961	SB	No
							peptide deformylase, mitochondrial	LOC105203028	-0.136146	Sb	No		tachykinins	LOC105202817	0.150727	SB	No
							aldose reductase	LOC105203029	-1.21347	Sb	No		cytochrome P450 4C1	LOC105202818	0.206757	SB	No
							uncharacterized LOC105203030	LOC105203030	-0.802681	Sb	No		uncharacterized LOC105202820	LOC105202820	0.472563	SB	No
							probable tRNA (guanine(26)-N(2))-dimethyltransferase	LOC105203031	-0.166508	Sb	No		cytochrome P450 4C1-like	LOC105202821	-0.985862	Sb	No
							1,5-anhydro-D-fructose reductase-like	LOC105203032	-0.412929	Sb	No		cytochrome P450 4C1	LOC105202822	-0.0830389	Sb	No
							uncharacterized LOC105203033	LOC105203033	0.256065	SB	No		pheromone-binding protein Gp-9	LOC105202823	1.00006	SB	No
							60S ribosomal protein L4	LOC105203034	0.376938	SB	No		alpha-tocopherol transfer protein-like	LOC105202826	-0.102302	Sb	No
							PH domain-containing protein DDB_G0287875-like	LOC105203035	0.0776106	SB	No		glucose dehydrogenase [FAD, quinone]-like	LOC105202827	-0.388589	Sb	No
							protein FAM160B1	LOC105203036	-0.184262	Sb	No		UDP-glucuronosyltransferase 2B1-like	LOC105202831	-0.369894	Sb	No
							hexokinase type 2-like	LOC105203037	0.0821286	SB	No		uncharacterized LOC105202832	LOC105202832	-0.727294	Sb	No
							BRISC complex subunit FAM175B	LOC105203038	0.0278907	SB	No		cytochrome P450 4C1	LOC105202834	-0.828157	Sb	No
							Hermansky-Pudlak syndrome 1 protein homolog	LOC105203039	-0.0295781	Sb	No		4-hydroxybutyrate coenzyme A transferase-like	LOC105203016	-0.100852	Sb	No
							uncharacterized LOC105203040	LOC105203040	0.417193	SB	No		4-hydroxybutyrate coenzyme A transferase-like	LOC105203017	-0.3354	Sb	No
							max dimerization protein 1	LOC105203041	-0.389204	Sb	No		TGF-beta-activated kinase 1 and MAP3K7-binding protein 1	LOC105203018	-1.11852	Sb	No
							ABC transporter G family member 20-like	LOC105203042	4.2045e-16	SB	No		V-type proton ATPase subunit B	LOC105203019	0.113944	SB	No
							ABC transporter G family member 20	LOC105203044	-0.0220032	Sb	No		DNA repair and recombination protein RAD54-like	LOC105203020	0.0548937	SB	No
							uncharacterized LOC105203046	LOC105203046	0.29237	SB	No		serine/threonine-protein phosphatase 1 regulatory subunit 10	LOC105203021	-0.206116	Sb	No
							phosphoglucomutase	LOC105203048	0.0266729	SB	No		U6 snRNA-associated Sm-like protein LSm8	LOC105203023	-0.210042	Sb	No
							protein N-lysine methyltransferase FAM173B	LOC105203049	-0.298508	Sb	No		DE-cadherin	LOC105203024	-0.376942	Sb	No
							ribulose-phosphate 3-epimerase	LOC105203050	-0.0593425	Sb	No		tubby-related protein 4	LOC105203026	-0.260289	Sb	No
							putative methyltransferase C9orf114 homolog	LOC105203051	-0.228281	Sb	No		sphingosine-1-phosphate lyase	LOC105203027	0.232879	SB	No
							U3 small nucleolar ribonucleoprotein protein IMP3	LOC105203052	-0.0887058	Sb	No		peptide deformylase, mitochondrial	LOC105203028	-0.0628788	Sb	No
							huntingtin	LOC105203053	-0.0281119	Sb	No		uncharacterized LOC105203030	LOC105203030	-0.782115	Sb	No
							probable sodium/potassium/calcium exchanger CG1090	LOC105203055	0.139973	SB	No		probable tRNA (guanine(26)-N(2))-dimethyltransferase	LOC105203031	-0.0782391	Sb	No
							tetratricopeptide repeat protein 1	LOC105203056	0.161344	SB	No		1,5-anhydro-D-fructose reductase-like	LOC105203032	-0.43339	Sb	No
							endoplasmic reticulum metallopeptidase 1	LOC105203057	0.2098	SB	No		uncharacterized LOC105203033	LOC105203033	0.0129033	SB	No
							uncharacterized LOC105203058	LOC105203058	0.823603	SB	No		60S ribosomal protein L4	LOC105203034	0.38243	SB	No
							microtubule-associated protein futsch	LOC105203059	0.652254	SB	No		PH domain-containing protein DDB_G0287875-like	LOC105203035	-0.157772	Sb	No
							uncharacterized LOC105203060	LOC105203060	0.00824689	SB	No		protein FAM160B1	LOC105203036	-0.443146	Sb	No
							m7GpppN-mRNA hydrolase	LOC105203061	0.390077	SB	No		hexokinase type 2-like	LOC105203037	6.10653e-16	SB	No
							phosphomevalonate kinase	LOC105203063	0.172046	SB	No		BRISC complex subunit FAM175B	LOC105203038	-0.194693	Sb	No
							60S ribosomal protein L29-1	LOC105203064	-0.00752605	Sb	No		Hermansky-Pudlak syndrome 1 protein homolog	LOC105203039	-0.298224	Sb	No
							atrial natriuretic peptide receptor 1	LOC105203066	0.692658	SB	No		uncharacterized LOC105203040	LOC105203040	0.194727	SB	No
							cysteine and histidine-rich protein 1 homolog	LOC105203067	-0.175812	Sb	No		max dimerization protein 1	LOC105203041	-0.37237	Sb	No
							uncharacterized LOC105203068	LOC105203068	-0.0376792	Sb	No		ABC transporter G family member 20-like	LOC105203042	1.11114	SB	No
							uncharacterized LOC105203069	LOC105203069	0	Sb	No		uncharacterized LOC105203043	LOC105203043	-0.286363	Sb	No
							nucleoside diphosphate kinase homolog 5-like	LOC105203070	0.301509	SB	No		ABC transporter G family member 20	LOC105203044	-0.142892	Sb	No
							myogenesis-regulating glycosidase	LOC105203071	-0.249584	Sb	No		phosphoglucomutase	LOC105203048	0.0605394	SB	No
							sorting nexin-27	LOC105203072	0.223677	SB	No		protein N-lysine methyltransferase FAM173B	LOC105203049	-0.128853	Sb	No
							uncharacterized LOC105203073	LOC105203073	-0.385353	Sb	No		ribulose-phosphate 3-epimerase	LOC105203050	-0.080457	Sb	No
							39S ribosomal protein L35, mitochondrial	LOC105203074	-0.475592	Sb	No		putative methyltransferase C9orf114 homolog	LOC105203051	0.0783034	SB	No
							fumarylacetoacetate hydrolase domain-containing protein 2A	LOC105203075	-0.625435	Sb	No		U3 small nucleolar ribonucleoprotein protein IMP3	LOC105203052	-0.0652211	Sb	No
							nucleolar protein 16	LOC105203076	0.859051	SB	No		huntingtin	LOC105203053	-0.186986	Sb	No
							proclotting enzyme	LOC105203077	0.75117	SB	No		probable sodium/potassium/calcium exchanger CG1090	LOC105203055	0.214265	SB	No
							atrial natriuretic peptide receptor 1	LOC105203079	0.527017	SB	No		tetratricopeptide repeat protein 1	LOC105203056	0.295899	SB	No
							uncharacterized LOC105203080	LOC105203080	0.100227	SB	No		endoplasmic reticulum metallopeptidase 1	LOC105203057	-0.044217	Sb	No
							semaphorin-5B	LOC105203081	0.19391	SB	No		uncharacterized LOC105203058	LOC105203058	0.12615	SB	No
							cysteine sulfinic acid decarboxylase	LOC105203082	0.416849	SB	No		microtubule-associated protein futsch	LOC105203059	0.192357	SB	No
							tachykinin-like peptides receptor 99D	LOC105203085	-4.05434e-15	Sb	No		uncharacterized LOC105203060	LOC105203060	-0.163006	Sb	No
							cytochrome P450 4C1-like	LOC105203087	-0.697506	Sb	No		m7GpppN-mRNA hydrolase	LOC105203061	0.450424	SB	No
							aldose reductase-like	LOC105203090	0.720946	SB	No		phosphomevalonate kinase	LOC105203063	0.0382289	SB	No
							uncharacterized LOC105203092	LOC105203092	-0.0339697	Sb	No		60S ribosomal protein L29-1	LOC105203064	0.0987629	SB	No
							ABC transporter G family member 20-like	LOC105203095	0.0269328	SB	No		atrial natriuretic peptide receptor 1	LOC105203066	0.40717	SB	No
							sodium-coupled neutral amino acid transporter 9	LOC105203096	0.716204	SB	No		cysteine and histidine-rich protein 1 homolog	LOC105203067	-0.141898	Sb	No
							MICOS complex subunit Mic60-like	LOC105203097	-0.325289	Sb	No		uncharacterized LOC105203068	LOC105203068	-0.370596	Sb	No
							acyl-CoA Delta(11) desaturase	LOC105204968	-0.314674	Sb	No		uncharacterized LOC105203069	LOC105203069	-0.444326	Sb	No
							suppressor of lurcher protein 1	LOC105204975	-0.409543	Sb	No		nucleoside diphosphate kinase homolog 5-like	LOC105203070	-0.101582	Sb	No
							dopamine receptor 1	LOC105206526	0.214079	SB	No		myogenesis-regulating glycosidase	LOC105203071	-0.165718	Sb	No
							vesicular integral-membrane protein VIP36	LOC105206540	0.363512	SB	No		sorting nexin-27	LOC105203072	0.18053	SB	No
							wolframin	LOC105206549	0.125599	SB	No		uncharacterized LOC105203073	LOC105203073	-0.110554	Sb	No
							epsilon-sarcoglycan	LOC105206559	-0.256543	Sb	No		39S ribosomal protein L35, mitochondrial	LOC105203074	-0.123771	Sb	No
							uncharacterized LOC105206574	LOC105206574	0.670362	SB	No		fumarylacetoacetate hydrolase domain-containing protein 2A	LOC105203075	-0.222274	Sb	No
							uncharacterized LOC105206598	LOC105206598	-0.0655549	Sb	No		nucleolar protein 16	LOC105203076	0.177066	SB	No
							uncharacterized LOC105206612	LOC105206612	1.17287	SB	No		proclotting enzyme	LOC105203077	-0.126352	Sb	No
							upstream activation factor subunit spp27	LOC105206620	-0.155455	Sb	No		uncharacterized LOC105203078	LOC105203078	0.28355	SB	No
							cilia- and flagella-associated protein 206	LOC105206630	-1.07512	Sb	No		atrial natriuretic peptide receptor 1	LOC105203079	0.37237	SB	No
							uncharacterized LOC105206635	LOC105206635	0.274739	SB	No		uncharacterized LOC105203080	LOC105203080	-0.288094	Sb	No
							ADP-ribosylation factor-like protein 3	LOC105206648	0.00357021	SB	No		semaphorin-5B	LOC105203081	6.00642e-17	SB	No
							uncharacterized LOC105206689	LOC105206689	-0.0920701	Sb	No		cysteine sulfinic acid decarboxylase	LOC105203082	0.487625	SB	No
							uncharacterized LOC105206701	LOC105206701	0.209762	SB	No		tachykinin-like peptides receptor 99D	LOC105203085	-0.376942	Sb	No
							mushroom body large-type Kenyon cell-specific protein 1	LOC105206711	0.21055	SB	No		cytochrome P450 4C1-like	LOC105203086	-0.481574	Sb	No
							probable JmjC domain-containing histone demethylation protein 2C	LOC105207370	0.480874	SB	No		cytochrome P450 4C1-like	LOC105203087	-0.0809641	Sb	No
							tyrosine-protein phosphatase non-receptor type 9	LOC105207387	-0.238334	Sb	No		aldose reductase-like	LOC105203090	-0.110554	Sb	No
							cell division cycle protein 16 homolog	LOC105207396	-0.115127	Sb	No		histone-binding protein N1/N2-like	LOC105203091	0.340135	SB	No
							cytoplasmic polyadenylation element-binding protein 1	LOC105207402	0.165974	SB	No		uncharacterized LOC105203092	LOC105203092	0.14816	SB	No
							peroxisomal membrane protein 11C	LOC105207412	-0.60412	Sb	No		ABC transporter G family member 20-like	LOC105203095	-0.14811	Sb	No
							cytoplasmic polyadenylation element-binding protein 2	LOC105207423	-0.608986	Sb	No		sodium-coupled neutral amino acid transporter 9	LOC105203096	0.385875	SB	No
							tubulin epsilon chain	LOC105207434	0.183023	SB	No		MICOS complex subunit Mic60-like	LOC105203097	-0.157702	Sb	No
							uncharacterized LOC105207450	LOC105207450	0.0499882	SB	No		acyl-CoA Delta(11) desaturase	LOC105204968	0.538681	SB	No
							nuclear envelope integral membrane protein 1	LOC105207460	0.0603471	SB	No		suppressor of lurcher protein 1-like	LOC105204974	0.12615	SB	No
							uncharacterized LOC105207466	LOC105207466	1.35943	SB	No		suppressor of lurcher protein 1	LOC105204975	0	Sb	No
							uncharacterized LOC105207526	LOC105207526	-1.15506	Sb	No		dopamine receptor 1	LOC105206526	-0.285797	Sb	No
							ATP-dependent RNA helicase vasa	LOC105207534	1.55084	SB	No		hypothetical protein	LOC105206534	-0.388589	Sb	No
							ATP-dependent RNA helicase vasa	LOC105207577	-1.18877e-16	Sb	No		vesicular integral-membrane protein VIP36	LOC105206540	0.443849	SB	No
							uncharacterized LOC105207586	LOC105207586	0.377996	SB	No		wolframin	LOC105206549	0.0655536	SB	No
							cilia- and flagella-associated protein 43-like	LOC105207603	0.647536	SB	No		epsilon-sarcoglycan	LOC105206559	0	Sb	No
							uncharacterized LOC105207609	LOC105207609	1.48933	SB	No		uncharacterized LOC105206574	LOC105206574	0.179049	SB	No
							transferrin	LOC105207481	-0.083	Sb	No		probable small nuclear ribonucleoprotein G	LOC105206590	0.37237	SB	No
													uncharacterized LOC105206598	LOC105206598	-0.298506	Sb	No
													uncharacterized LOC105206612	LOC105206612	0.150727	SB	No
													upstream activation factor subunit spp27	LOC105206620	0.126639	SB	No
													cilia- and flagella-associated protein 206	LOC105206630	0.386112	SB	No
													uncharacterized LOC105206635	LOC105206635	0.16108	SB	No
													ADP-ribosylation factor-like protein 3	LOC105206648	-8.00857e-17	Sb	No
													uncharacterized LOC105206673	LOC105206673	0.912589	SB	No
													uncharacterized LOC105206689	LOC105206689	-0.0439642	Sb	No
													uncharacterized LOC105206701	LOC105206701	-0.213384	Sb	No
													mushroom body large-type Kenyon cell-specific protein 1	LOC105206711	1.86281e-16	SB	No
													probable JmjC domain-containing histone demethylation protein 2C	LOC105207370	0.110554	SB	No
													tyrosine-protein phosphatase non-receptor type 9	LOC105207387	-0.049487	Sb	No
													cell division cycle protein 16 homolog	LOC105207396	0.132551	SB	No
													cytoplasmic polyadenylation element-binding protein 1	LOC105207402	0.0580321	SB	No
													peroxisomal membrane protein 11C	LOC105207412	-0.463071	Sb	No
													cytoplasmic polyadenylation element-binding protein 2	LOC105207423	-0.285797	Sb	No
													tubulin epsilon chain	LOC105207434	-0.17631	Sb	No
													uncharacterized LOC105207450	LOC105207450	0.38811	SB	No
													nuclear envelope integral membrane protein 1	LOC105207460	0.421315	SB	No
													uncharacterized LOC105207466	LOC105207466	0.190957	SB	No
													uncharacterized LOC105207472	LOC105207472	-0.376942	Sb	No
													transferrin	LOC105207481	-0.209257	Sb	No
													uncharacterized LOC105207526	LOC105207526	-0.714796	Sb	No
													ATP-dependent RNA helicase vasa	LOC105207534	-0.492145	Sb	No
													probable glutamate receptor	LOC105207542	-0.492145	Sb	No
													uncharacterized LOC105207561	LOC105207561	1.10118e-16	SB	No
													uncharacterized LOC105207569	LOC105207569	0.12615	SB	No
													ATP-dependent RNA helicase vasa	LOC105207577	0.131864	SB	No
													uncharacterized LOC105207586	LOC105207586	-2.00214e-17	Sb	No
													cilia- and flagella-associated protein 43-like	LOC105207603	-0.204274	Sb	No
													uncharacterized LOC105207609	LOC105207609	-0.279795	Sb	No
