# Supplementary material for: Genomic architecture and evolutionary antagonism drive allelic expression bias in the social supergene of red fire ants
Source: eLife journal article supplement (doi:10.7554/elife.55862), 2020-08-10
Supplement: supp [file elife-55862-supp-v1.zip › elife_poa_e55862_Supplementary_file_4.xlsx]

## Sheet: Sheet1
Gene description	Gene RefSeq ID	Log2 fold difference	Highly expressed in	Region
endocuticle structural glycoprotein SgAbd-1-like	LOC105192793	2.07972	Multiple queen	Rest of the genome
uncharacterized LOC105193076	LOC105193076	2.29795	Multiple queen	Unknown
ankyrin-1	LOC105193099	2.04647	Multiple queen	Rest of the genome
cuticle protein CP14.6-like	LOC105193179	2.49347	Multiple queen	Rest of the genome
lipase 3	LOC105193250	-2.03598	Single queen	Unknown
serine protease 53	LOC105193271	2.74684	Multiple queen	Rest of the genome
uncharacterized LOC105193295	LOC105193295	1.829	Multiple queen	Rest of the genome
general odorant-binding protein 72	LOC105193332	2.8183	Multiple queen	Unknown
venom allergen 2	LOC105193335	2.08894	Multiple queen	Rest of the genome
juvenile hormone acid O-methyltransferase	LOC105193367	3.06523	Multiple queen	Unknown
uncharacterized LOC105193375	LOC105193375	3.12201	Multiple queen	Rest of the genome
hemocytin	LOC105193532	2.4757	Multiple queen	Rest of the genome
MD-2-related lipid-recognition protein	LOC105193603	3.33677	Multiple queen	Unknown
peptidyl-alpha-hydroxyglycine alpha-amidating lyase 2	LOC105193621	2.62224	Multiple queen	Rest of the genome
uncharacterized LOC105193725	LOC105193725	2.52615	Multiple queen	Rest of the genome
leucine-rich repeat-containing protein let-4	LOC105193775	2.90691	Multiple queen	Rest of the genome
uncharacterized LOC105193825	LOC105193825	1.91463	Multiple queen	Supergene
alpha-glucosidase-like	LOC105193841	2.18364	Multiple queen	Rest of the genome
major facilitator superfamily domain-containing protein 6-A	LOC105193870	2.76497	Multiple queen	Supergene
cytochrome P450 4C1-like	LOC105193888	3.71668	Multiple queen	Rest of the genome
uncharacterized LOC105193901	LOC105193901	1.70342	Multiple queen	Rest of the genome
uncharacterized LOC105193905	LOC105193905	3.22902	Multiple queen	Rest of the genome
uncharacterized LOC105193908	LOC105193908	4.28868	Multiple queen	Rest of the genome
uncharacterized LOC105193910	LOC105193910	3.78967	Multiple queen	Rest of the genome
cytochrome P450 4C1-like	LOC105193924	1.78306	Multiple queen	Rest of the genome
uncharacterized LOC105194018	LOC105194018	3.4258	Multiple queen	Unknown
uncharacterized LOC105194074	LOC105194074	1.78837	Multiple queen	Unknown
glycerol-3-phosphate dehydrogenase [NAD(+)], cytoplasmic	LOC105194115	2.22587	Multiple queen	Rest of the genome
caspase-1-like	LOC105194248	4.45676	Multiple queen	Unknown
synaptic vesicle glycoprotein 2B	LOC105194261	2.43553	Multiple queen	Rest of the genome
uncharacterized LOC105194283	LOC105194283	1.95524	Multiple queen	Unknown
muscle LIM protein Mlp84B	LOC105194324	1.67556	Multiple queen	Rest of the genome
maltase 1	LOC105194331	3.4683	Multiple queen	Rest of the genome
facilitated trehalose transporter Tret1	LOC105194443	2.63593	Multiple queen	Rest of the genome
tyrosine 3-monooxygenase	LOC105194448	2.60777	Multiple queen	Rest of the genome
pheromone-binding protein Gp-9	LOC105194481	2.75648	Multiple queen	Supergene
pheromone-binding protein Gp-9	LOC105194487	4.77132	Multiple queen	Supergene
clavesin-2	LOC105194531	2.26481	Multiple queen	Rest of the genome
trypsin 5G1	LOC105194551	2.97427	Multiple queen	Supergene
uncharacterized LOC105194595	LOC105194595	2.01688	Multiple queen	Rest of the genome
calumenin-B	LOC105194606	-1.98784	Single queen	Rest of the genome
chymotrypsin-1-like	LOC105194637	4.07638	Multiple queen	Rest of the genome
glutamate decarboxylase	LOC105194684	2.41527	Multiple queen	Rest of the genome
uncharacterized LOC105194686	LOC105194686	-1.75819	Single queen	Rest of the genome
putative defense protein 3	LOC105194739	2.10373	Multiple queen	Rest of the genome
glucosylceramidase	LOC105194828	2.60712	Multiple queen	Rest of the genome
protein lethal(2)essential for life	LOC105195168	2.04299	Multiple queen	Rest of the genome
uncharacterized LOC105195289	LOC105195289	2.8011	Multiple queen	Rest of the genome
lysosomal aspartic protease	LOC105195296	2.25692	Multiple queen	Rest of the genome
rab GDP dissociation inhibitor beta	LOC105195302	-2.43631	Single queen	Rest of the genome
putative fatty acyl-CoA reductase CG5065	LOC105195515	4.05845	Multiple queen	Rest of the genome
sensory neuron membrane protein 1	LOC105195544	2.52408	Multiple queen	Rest of the genome
ecotropic viral integration site 5 ortholog	LOC105195578	-2.3184	Single queen	Rest of the genome
retinol dehydrogenase 12-like	LOC105195606	3.57369	Multiple queen	Rest of the genome
retinol dehydrogenase 12	LOC105195607	2.86891	Multiple queen	Rest of the genome
probable cytochrome P450 6a14	LOC105195645	1.87262	Multiple queen	Rest of the genome
uncharacterized LOC105195721	LOC105195721	2.52858	Multiple queen	Rest of the genome
putative odorant-binding protein A10	LOC105195741	2.95875	Multiple queen	Supergene
uncharacterized LOC105195876	LOC105195876	4.10374	Multiple queen	Rest of the genome
cytochrome P450 4C1-like	LOC105195914	3.75271	Multiple queen	Unknown
cohesin subunit SA-1	LOC105195944	-2.85986	Single queen	Unknown
homogentisate 1,2-dioxygenase	LOC105195952	3.20978	Multiple queen	Rest of the genome
pupal cuticle protein C1B	LOC105195966	2.19572	Multiple queen	Rest of the genome
uncharacterized LOC105196041	LOC105196041	3.35678	Multiple queen	Rest of the genome
serine proteinase stubble-like	LOC105196044	1.76351	Multiple queen	Rest of the genome
luciferin 4-monooxygenase-like	LOC105196064	4.76421	Multiple queen	Rest of the genome
putative serine protease K12H4.7	LOC105196079	2.42662	Multiple queen	Rest of the genome
putative odorant-binding protein A10	LOC105196153	2.03189	Multiple queen	Rest of the genome
ejaculatory bulb-specific protein 3	LOC105196156	2.68721	Multiple queen	Rest of the genome
uncharacterized LOC105196181	LOC105196181	2.59114	Multiple queen	Rest of the genome
ejaculatory bulb-specific protein 3	LOC105196234	3.065	Multiple queen	Rest of the genome
uncharacterized LOC105196285	LOC105196285	2.03082	Multiple queen	Rest of the genome
solute carrier organic anion transporter family member 2A1	LOC105196351	1.8763	Multiple queen	Rest of the genome
uncharacterized LOC105196357	LOC105196357	1.68429	Multiple queen	Rest of the genome
apolipoprotein D-like	LOC105196364	2.56268	Multiple queen	Rest of the genome
elongation of very long chain fatty acids protein 4-like	LOC105196410	1.69047	Multiple queen	Rest of the genome
uncharacterized LOC105196415	LOC105196415	3.52538	Multiple queen	Unknown
nucleolar protein 12	LOC105196458	2.34776	Multiple queen	Rest of the genome
PI-actitoxin-Afv2a-like	LOC105196471	3.16185	Multiple queen	Rest of the genome
deoxycytidylate deaminase	LOC105196476	2.23599	Multiple queen	Rest of the genome
nose resistant to fluoxetine protein 6	LOC105196479	4.40165	Multiple queen	Rest of the genome
fatty acid synthase-like	LOC105196493	6.86105	Multiple queen	Unknown
leucine-rich repeat transmembrane neuronal protein 4-like	LOC105196510	4.03721	Multiple queen	Unknown
rootletin	LOC105196526	2.71378	Multiple queen	Rest of the genome
ejaculatory bulb-specific protein 3	LOC105196606	2.75705	Multiple queen	Rest of the genome
sulfhydryl oxidase 2	LOC105196608	-2.74345	Single queen	Rest of the genome
cytochrome P450 4c21-like	LOC105196615	3.59318	Multiple queen	Unknown
zinc carboxypeptidase-like	LOC105196618	3.2858	Multiple queen	Unknown
D-aspartate oxidase	LOC105196680	1.83704	Multiple queen	Unknown
probable salivary secreted peptide	LOC105196694	1.8907	Multiple queen	Rest of the genome
probable salivary secreted peptide	LOC105196696	2.008	Multiple queen	Rest of the genome
uncharacterized LOC105196746	LOC105196746	2.4903	Multiple queen	Rest of the genome
uncharacterized LOC105196785	LOC105196785	4.8453	Multiple queen	Rest of the genome
muscle M-line assembly protein unc-89	LOC105196829	1.86044	Multiple queen	Unknown
uncharacterized LOC105196875	LOC105196875	3.11999	Multiple queen	Rest of the genome
ATP-binding cassette sub-family G member 4	LOC105196913	2.59674	Multiple queen	Unknown
uncharacterized LOC105196995	LOC105196995	3.07219	Multiple queen	Rest of the genome
acyl-CoA Delta(11) desaturase	LOC105197000	3.21376	Multiple queen	Rest of the genome
4-nitrophenylphosphatase	LOC105197007	2.17946	Multiple queen	Unknown
prostatic acid phosphatase	LOC105197025	-2.22625	Single queen	Rest of the genome
uncharacterized LOC105197092	LOC105197092	2.91755	Multiple queen	Unknown
homeodomain-only protein	LOC105197127	2.51239	Multiple queen	Unknown
keratin, type I cytoskeletal 14	LOC105197140	3.85277	Multiple queen	Rest of the genome
uncharacterized LOC105197153	LOC105197153	1.96889	Multiple queen	Unknown
troponin I	LOC105197190	1.73483	Multiple queen	Rest of the genome
soma ferritin	LOC105197193	1.79342	Multiple queen	Rest of the genome
transient-receptor-potential-like protein	LOC105197202	2.86568	Multiple queen	Rest of the genome
tyrosine aminotransferase	LOC105197229	3.17538	Multiple queen	Rest of the genome
neural-cadherin	LOC105197230	4.6895	Multiple queen	Rest of the genome
FCH and double SH3 domains protein 1-like	LOC105197282	3.27217	Multiple queen	Unknown
probable cytochrome P450 6a20	LOC105197284	2.33034	Multiple queen	Unknown
NPC intracellular cholesterol transporter 2 homolog a	LOC105197297	3.10915	Multiple queen	Rest of the genome
uncharacterized LOC105197467	LOC105197467	-1.46389	Single queen	Rest of the genome
guanine nucleotide-binding protein G(q) subunit alpha	LOC105197512	1.86795	Multiple queen	Rest of the genome
aminopeptidase N	LOC105197517	2.61895	Multiple queen	Rest of the genome
cysteine-rich secretory protein 1	LOC105197582	2.37826	Multiple queen	Rest of the genome
optomotor-blind protein	LOC105197768	3.07928	Multiple queen	Rest of the genome
SET domain-containing protein SmydA-8	LOC105197844	2.40177	Multiple queen	Rest of the genome
glutamic acid-rich protein	LOC105197879	2.18125	Multiple queen	Unknown
fatty acid synthase	LOC105197914	2.29016	Multiple queen	Rest of the genome
venom allergen 3-like	LOC105197917	4.7443	Multiple queen	Unknown
fatty acid synthase-like	LOC105197918	2.59039	Multiple queen	Unknown
serine protease 48	LOC105197985	2.19825	Multiple queen	Unknown
tropomyosin-1	LOC105198027	2.03597	Multiple queen	Rest of the genome
hypothetical protein	LOC105198103	3.31712	Multiple queen	Rest of the genome
caspase-1	LOC105198123	2.53621	Multiple queen	Unknown
fatty acid synthase	LOC105198163	4.59694	Multiple queen	Unknown
uncharacterized LOC105198202	LOC105198202	2.30861	Multiple queen	Rest of the genome
uncharacterized LOC105198268	LOC105198268	2.46871	Multiple queen	Rest of the genome
probable cytochrome P450 4aa1	LOC105198272	4.01818	Multiple queen	Rest of the genome
alpha-tocopherol transfer protein-like	LOC105198281	2.05042	Multiple queen	Rest of the genome
alpha-tocopherol transfer protein-like	LOC105198290	2.26449	Multiple queen	Rest of the genome
scavenger receptor class B member 1	LOC105198403	2.47126	Multiple queen	Rest of the genome
alpha-glucosidase	LOC105198437	2.9722	Multiple queen	Rest of the genome
lipase 3-like	LOC105198588	1.87305	Multiple queen	Unknown
uncharacterized LOC105198590	LOC105198590	1.9212	Multiple queen	Unknown
acylphosphatase-2	LOC105198671	1.98814	Multiple queen	Unknown
ejaculatory bulb-specific protein 3	LOC105198672	2.7101	Multiple queen	Rest of the genome
catalase	LOC105198687	1.61401	Multiple queen	Unknown
elongation of very long chain fatty acids protein 4-like	LOC105198876	3.57383	Multiple queen	Rest of the genome
elongation of very long chain fatty acids protein 4	LOC105198878	2.79561	Multiple queen	Unknown
uncharacterized LOC105198934	LOC105198934	2.79046	Multiple queen	Rest of the genome
protein obstructor-E	LOC105198948	2.95917	Multiple queen	Rest of the genome
hypothetical protein	LOC105198998	3.26814	Multiple queen	Rest of the genome
uncharacterized LOC105198999	LOC105198999	2.5474	Multiple queen	Rest of the genome
uncharacterized LOC105199046	LOC105199046	2.64211	Multiple queen	Rest of the genome
aquaporin AQPAn.G	LOC105199101	1.96048	Multiple queen	Rest of the genome
putative transcription factor SOX-15	LOC105199114	2.18934	Multiple queen	Rest of the genome
endocuticle structural glycoprotein SgAbd-5-like	LOC105199134	2.7673	Multiple queen	Rest of the genome
uncharacterized LOC105199157	LOC105199157	2.531	Multiple queen	Rest of the genome
calmodulin-binding transcription activator 2	LOC105199172	1.93944	Multiple queen	Rest of the genome
rhodopsin	LOC105199190	3.5191	Multiple queen	Rest of the genome
rhodopsin	LOC105199191	2.71198	Multiple queen	Rest of the genome
protein yellow	LOC105199196	1.94451	Multiple queen	Rest of the genome
neuroligin-1	LOC105199207	3.15329	Multiple queen	Rest of the genome
protein takeout-like	LOC105199218	1.97102	Multiple queen	Rest of the genome
cytochrome P450 6k1	LOC105199236	2.09986	Multiple queen	Rest of the genome
esterase FE4-like	LOC105199287	2.75062	Multiple queen	Supergene
retinol dehydrogenase 14	LOC105199288	2.45001	Multiple queen	Supergene
dynein regulatory complex subunit 4	LOC105199315	3.97255	Multiple queen	Supergene
arrestin homolog	LOC105199319	3.88472	Multiple queen	Supergene
retinol-binding protein pinta	LOC105199323	2.07039	Multiple queen	Supergene
retinol-binding protein pinta	LOC105199325	2.33834	Multiple queen	Supergene
retinol-binding protein pinta-like	LOC105199326	2.92415	Multiple queen	Supergene
retinol-binding protein pinta-like	LOC105199327	2.80144	Multiple queen	Supergene
farnesol dehydrogenase	LOC105199354	2.66196	Multiple queen	Supergene
lysozyme	LOC105199375	1.97555	Multiple queen	Rest of the genome
ejaculatory bulb-specific protein 3	LOC105199523	3.98011	Multiple queen	Supergene
homeobox protein SIX2	LOC105199529	-2.92931	Single queen	Rest of the genome
ejaculatory bulb-specific protein 3	LOC105199531	2.08182	Multiple queen	Supergene
ejaculatory bulb-specific protein 3-like	LOC105199539	3.01025	Multiple queen	Supergene
pre-mRNA-splicing factor CWC22 homolog	LOC105199554	-2.49704	Single queen	Unknown
plasminogen activator inhibitor 2, macrophage-like	LOC105199561	-1.6177	Single queen	Rest of the genome
oxysterol-binding protein-related protein 2	LOC105199568	2.25693	Multiple queen	Rest of the genome
uncharacterized LOC105199588	LOC105199588	2.52825	Multiple queen	Rest of the genome
uncharacterized LOC105199589	LOC105199589	3.50564	Multiple queen	Rest of the genome
uncharacterized LOC105199670	LOC105199670	3.08203	Multiple queen	Rest of the genome
venom allergen 3	LOC105199698	3.56445	Multiple queen	Supergene
uncharacterized LOC105199732	LOC105199732	3.16215	Multiple queen	Unknown
putative protein kinase C delta type homolog	LOC105199761	2.68315	Multiple queen	Unknown
NADH dehydrogenase [ubiquinone] 1 alpha subcomplex subunit 9, mitochondrial-like	LOC105199789	2.12778	Multiple queen	Supergene
synaptotagmin-7	LOC105199815	3.68241	Multiple queen	Rest of the genome
cingulin-like	LOC105199831	5.19714	Multiple queen	Unknown
fatty acyl-CoA reductase wat	LOC105199852	2.11533	Multiple queen	Unknown
uncharacterized LOC105199900	LOC105199900	1.94057	Multiple queen	Rest of the genome
ankyrin repeat domain-containing protein 63-like	LOC105199979	2.79849	Multiple queen	Rest of the genome
uncharacterized LOC105200008	LOC105200008	4.10716	Multiple queen	Rest of the genome
acyl-CoA Delta(11) desaturase	LOC105200009	2.02573	Multiple queen	Rest of the genome
feline leukemia virus subgroup C receptor-related protein 2-like	LOC105200033	3.11131	Multiple queen	Rest of the genome
feline leukemia virus subgroup C receptor-related protein 2-like	LOC105200036	2.03793	Multiple queen	Rest of the genome
transmembrane protease serine 9	LOC105200094	3.26792	Multiple queen	Unknown
tyrocidine synthase 1	LOC105200114	1.73819	Multiple queen	Unknown
uncharacterized LOC105200182	LOC105200182	3.27687	Multiple queen	Unknown
muscle-specific protein 20	LOC105200269	1.88493	Multiple queen	Rest of the genome
chymotrypsin inhibitor	LOC105200274	2.09023	Multiple queen	Rest of the genome
peritrophin-1-like	LOC105200309	2.56372	Multiple queen	Rest of the genome
uncharacterized LOC105200310	LOC105200310	2.58707	Multiple queen	Rest of the genome
uncharacterized LOC105200311	LOC105200311	2.63708	Multiple queen	Rest of the genome
xanthine dehydrogenase/oxidase-like	LOC105200323	2.00659	Multiple queen	Unknown
uncharacterized LOC105200370	LOC105200370	2.35901	Multiple queen	Rest of the genome
fatty acyl-CoA reductase 1	LOC105200457	1.74381	Multiple queen	Unknown
uncharacterized LOC105200569	LOC105200569	2.64999	Multiple queen	Rest of the genome
uncharacterized LOC105200593	LOC105200593	1.81472	Multiple queen	Rest of the genome
putative fatty acyl-CoA reductase CG5065	LOC105200655	2.07067	Multiple queen	Rest of the genome
DDB1- and CUL4-associated factor 8	LOC105200663	2.19621	Multiple queen	Rest of the genome
uncharacterized LOC105200695	LOC105200695	2.74481	Multiple queen	Unknown
uncharacterized LOC105200746	LOC105200746	2.12212	Multiple queen	Rest of the genome
UDP-glucuronosyltransferase 3A1-like	LOC105200780	2.18718	Multiple queen	Rest of the genome
UDP-glucuronosyltransferase 2B7	LOC105200784	2.6553	Multiple queen	Rest of the genome
uncharacterized LOC105200816	LOC105200816	2.43839	Multiple queen	Rest of the genome
MORN repeat-containing protein 4 homolog	LOC105200837	3.66556	Multiple queen	Rest of the genome
uncharacterized LOC105200900	LOC105200900	2.32651	Multiple queen	Rest of the genome
opsin, blue-sensitive	LOC105200910	3.00564	Multiple queen	Rest of the genome
uncharacterized LOC105201013	LOC105201013	2.30714	Multiple queen	Rest of the genome
uncharacterized LOC105201020	LOC105201020	2.78409	Multiple queen	Rest of the genome
acetylcholine receptor subunit alpha-type acr-16	LOC105201027	3.76987	Multiple queen	Rest of the genome
uncharacterized LOC105201059	LOC105201059	3.48543	Multiple queen	Unknown
transcription termination factor 2	LOC105201137	-1.80135	Single queen	Rest of the genome
N-acetylgalactosaminyltransferase 6	LOC105201214	-2.03725	Single queen	Rest of the genome
uncharacterized LOC105201266	LOC105201266	2.21207	Multiple queen	Unknown
general odorant-binding protein 56d	LOC105201278	1.9759	Multiple queen	Unknown
cytochrome b5-related protein	LOC105201285	3.25606	Multiple queen	Rest of the genome
elongation of very long chain fatty acids protein AAEL008004	LOC105201316	3.35351	Multiple queen	Unknown
uncharacterized LOC105201362	LOC105201362	2.17346	Multiple queen	Rest of the genome
kielin/chordin-like protein	LOC105201363	3.43979	Multiple queen	Rest of the genome
probable cytochrome P450 6a13	LOC105201377	2.72912	Multiple queen	Rest of the genome
ornithine aminotransferase, mitochondrial-like	LOC105201521	2.62381	Multiple queen	Supergene
ornithine aminotransferase, mitochondrial-like	LOC105201522	2.38888	Multiple queen	Supergene
uncharacterized protein MAL13P1.304-like	LOC105201536	-1.79372	Single queen	Supergene
fatty acyl-CoA reductase 1	LOC105201567	4.62454	Multiple queen	Rest of the genome
immunoglobulin domain-containing protein oig-4-like	LOC105201583	2.64296	Multiple queen	Rest of the genome
adenosine deaminase 2	LOC105201619	2.59033	Multiple queen	Rest of the genome
putative odorant-binding protein A10	LOC105201829	1.86117	Multiple queen	Rest of the genome
uncharacterized LOC105201866	LOC105201866	4.10554	Multiple queen	Rest of the genome
uncharacterized LOC105201875	LOC105201875	2.43825	Multiple queen	Rest of the genome
protein G12-like	LOC105201876	2.34688	Multiple queen	Rest of the genome
uncharacterized LOC105201877	LOC105201877	2.55057	Multiple queen	Rest of the genome
lysophospholipase D GDPD1-like	LOC105202101	-2.71475	Single queen	Rest of the genome
uncharacterized LOC105202151	LOC105202151	2.44391	Multiple queen	Rest of the genome
fatty acid synthase	LOC105202182	2.33553	Multiple queen	Unknown
keratin-associated protein 19-2-like	LOC105202214	2.2165	Multiple queen	Rest of the genome
toll-like receptor 3	LOC105202230	2.97429	Multiple queen	Rest of the genome
leucine-rich repeats and immunoglobulin-like domains protein 2	LOC105202239	2.76919	Multiple queen	Rest of the genome
uncharacterized LOC105202242	LOC105202242	3.51893	Multiple queen	Rest of the genome
ABC transporter F family member 4-like	LOC105202345	1.64883	Multiple queen	Rest of the genome
mitochondrial pyruvate carrier 1	LOC105202348	2.83161	Multiple queen	Rest of the genome
uncharacterized LOC105202373	LOC105202373	3.42223	Multiple queen	Rest of the genome
uncharacterized LOC105202374	LOC105202374	1.97881	Multiple queen	Rest of the genome
piggyBac transposable element-derived protein 4-like	LOC105202398	4.42739	Multiple queen	Rest of the genome
uncharacterized LOC105202399	LOC105202399	3.00116	Multiple queen	Rest of the genome
glycine, alanine and asparagine-rich protein-like	LOC105202425	4.51358	Multiple queen	Rest of the genome
histone H1-like	LOC105202472	2.73154	Multiple queen	Rest of the genome
uncharacterized LOC105202523	LOC105202523	1.99023	Multiple queen	Unknown
uncharacterized LOC105202556	LOC105202556	4.89927	Multiple queen	Unknown
fatty acid synthase	LOC105202557	3.83768	Multiple queen	Rest of the genome
fatty acid synthase-like	LOC105202560	2.85364	Multiple queen	Rest of the genome
POU domain protein CF1A	LOC105202647	3.40054	Multiple queen	Rest of the genome
glutamic acid-rich protein	LOC105202662	2.84842	Multiple queen	Rest of the genome
arrestin homolog	LOC105202669	3.1228	Multiple queen	Rest of the genome
uncharacterized LOC105202739	LOC105202739	2.01661	Multiple queen	Rest of the genome
uncharacterized LOC105202756	LOC105202756	2.06265	Multiple queen	Unknown
ejaculatory bulb-specific protein 3	LOC105202765	3.62156	Multiple queen	Rest of the genome
uncharacterized LOC105202816	LOC105202816	-2.24099	Single queen	Supergene
uncharacterized LOC105202819	LOC105202819	2.72857	Multiple queen	Supergene
uncharacterized LOC105202820	LOC105202820	3.53389	Multiple queen	Supergene
pheromone-binding protein Gp-9	LOC105202824	2.48482	Multiple queen	Supergene
cytochrome P450 4C1	LOC105202834	2.777	Multiple queen	Supergene
peroxisomal membrane protein PMP34	LOC105202854	1.68163	Multiple queen	Rest of the genome
piggyBac transposable element-derived protein 4-like	LOC105202899	3.82165	Multiple queen	Unknown
glycine-rich protein DOT1	LOC105202924	2.95516	Multiple queen	Rest of the genome
fatty acid synthase	LOC105202953	2.44042	Multiple queen	Unknown
fatty acid synthase-like	LOC105202955	3.50078	Multiple queen	Unknown
fatty acid synthase	LOC105202956	6.50432	Multiple queen	Unknown
X-linked retinitis pigmentosa GTPase regulator-interacting protein 1-like	LOC105202972	2.88688	Multiple queen	Unknown
troponin C	LOC105202999	2.1909	Multiple queen	Unknown
uncharacterized LOC105203006	LOC105203006	3.15937	Multiple queen	Unknown
microtubule-associated protein futsch	LOC105203059	1.76341	Multiple queen	Supergene
cytochrome P450 4C1-like	LOC105203086	2.52718	Multiple queen	Supergene
histone-binding protein N1/N2-like	LOC105203091	-1.77218	Single queen	Supergene
uncharacterized LOC105203130	LOC105203130	3.29205	Multiple queen	Unknown
uncharacterized LOC105203228	LOC105203228	2.92455	Multiple queen	Unknown
probable cytochrome P450 6a14	LOC105203235	2.74355	Multiple queen	Rest of the genome
probable cytochrome P450 6a14	LOC105203236	3.97644	Multiple queen	Rest of the genome
uncharacterized LOC105203245	LOC105203245	2.28641	Multiple queen	Rest of the genome
uncharacterized LOC105203246	LOC105203246	3.08559	Multiple queen	Rest of the genome
protein snakeskin	LOC105203249	1.84524	Multiple queen	Rest of the genome
uncharacterized LOC105203281	LOC105203281	3.90575	Multiple queen	Unknown
fatty acid synthase-like	LOC105203326	2.87848	Multiple queen	Unknown
fatty acid synthase	LOC105203328	2.77101	Multiple queen	Unknown
uncharacterized LOC105203393	LOC105203393	2.5273	Multiple queen	Unknown
uncharacterized LOC105203404	LOC105203404	2.32047	Multiple queen	Rest of the genome
allatotropin-like	LOC105203405	2.30786	Multiple queen	Rest of the genome
uncharacterized LOC105203417	LOC105203417	1.96064	Multiple queen	Rest of the genome
flavin reductase (NADPH)-like	LOC105203429	2.1131	Multiple queen	Rest of the genome
flavin reductase (NADPH)	LOC105203443	3.69838	Multiple queen	Rest of the genome
fatty acid synthase-like	LOC105203494	2.91289	Multiple queen	Unknown
uncharacterized LOC105203496	LOC105203496	2.19896	Multiple queen	Rest of the genome
uncharacterized LOC105203531	LOC105203531	3.75619	Multiple queen	Unknown
glucose dehydrogenase [FAD, quinone]	LOC105203623	2.65764	Multiple queen	Rest of the genome
uncharacterized LOC105203625	LOC105203625	1.7946	Multiple queen	Rest of the genome
glucose dehydrogenase [FAD, quinone]-like	LOC105203631	3.08658	Multiple queen	Rest of the genome
cytochrome P450 4C1-like	LOC105203670	2.03058	Multiple queen	Rest of the genome
uncharacterized LOC105203686	LOC105203686	1.9726	Multiple queen	Unknown
neuroendocrine convertase 2	LOC105203804	2.52456	Multiple queen	Rest of the genome
uncharacterized LOC105203817	LOC105203817	1.78372	Multiple queen	Rest of the genome
circadian clock-controlled protein	LOC105203820	3.99747	Multiple queen	Rest of the genome
uncharacterized LOC105203821	LOC105203821	2.71434	Multiple queen	Rest of the genome
uncharacterized LOC105203822	LOC105203822	4.46195	Multiple queen	Rest of the genome
uncharacterized LOC105203824	LOC105203824	2.87455	Multiple queen	Rest of the genome
uncharacterized LOC105203827	LOC105203827	2.26136	Multiple queen	Rest of the genome
uncharacterized LOC105203828	LOC105203828	3.19176	Multiple queen	Rest of the genome
circadian clock-controlled protein	LOC105203833	3.03325	Multiple queen	Rest of the genome
lipase 3-like	LOC105203838	5.2153	Multiple queen	Rest of the genome
neuronal acetylcholine receptor subunit alpha-2-like	LOC105203848	4.23468	Multiple queen	Rest of the genome
circadian clock-controlled protein	LOC105203866	2.62163	Multiple queen	Rest of the genome
uncharacterized LOC105203874	LOC105203874	2.79926	Multiple queen	Rest of the genome
centrosomal and chromosomal factor	LOC105203960	3.17087	Multiple queen	Rest of the genome
uncharacterized LOC105203971	LOC105203971	2.94422	Multiple queen	Unknown
general odorant-binding protein 69a-like	LOC105203994	2.40061	Multiple queen	Rest of the genome
uncharacterized LOC105204000	LOC105204000	2.25764	Multiple queen	Rest of the genome
translocating chain-associated membrane protein 1	LOC105204006	-1.78631	Single queen	Rest of the genome
juvenile hormone epoxide hydrolase 1-like	LOC105204044	2.15223	Multiple queen	Rest of the genome
uncharacterized LOC105204050	LOC105204050	2.77732	Multiple queen	Rest of the genome
pheromone-binding protein Gp-9	LOC105204062	2.17444	Multiple queen	Rest of the genome
uncharacterized LOC105204082	LOC105204082	2.70706	Multiple queen	Rest of the genome
juvenile hormone epoxide hydrolase 1-like	LOC105204118	1.9714	Multiple queen	Rest of the genome
uncharacterized LOC105204140	LOC105204140	2.6367	Multiple queen	Unknown
uncharacterized LOC105204172	LOC105204172	1.56801	Multiple queen	Unknown
cytochrome P450 4C1-like	LOC105204192	2.3477	Multiple queen	Unknown
fatty acyl-CoA reductase 1-like	LOC105204265	4.58376	Multiple queen	Rest of the genome
uncharacterized LOC105204314	LOC105204314	1.86333	Multiple queen	Rest of the genome
hexamerin	LOC105204474	2.69355	Multiple queen	Unknown
uncharacterized LOC105204491	LOC105204491	4.87151	Multiple queen	Unknown
cytochrome P450 6j1	LOC105204661	2.34611	Multiple queen	Rest of the genome
uncharacterized LOC105204663	LOC105204663	2.85929	Multiple queen	Rest of the genome
cytochrome P450 9e2-like	LOC105204669	4.22214	Multiple queen	Rest of the genome
fatty acid synthase	LOC105204773	2.66437	Multiple queen	Unknown
sterol O-acyltransferase 1-like	LOC105204780	2.63793	Multiple queen	Rest of the genome
uncharacterized LOC105204823	LOC105204823	2.63903	Multiple queen	Rest of the genome
fatty-acid amide hydrolase 2-B-like	LOC105204824	1.66923	Multiple queen	Rest of the genome
alpha-1,3-mannosyl-glycoprotein 4-beta-N-acetylglucosaminyltransferase B-like	LOC105204896	-2.59389	Single queen	Rest of the genome
uncharacterized LOC105204955	LOC105204955	2.27404	Multiple queen	Unknown
venom allergen 4-like	LOC105205100	3.04186	Multiple queen	Unknown
uncharacterized LOC105205139	LOC105205139	3.56696	Multiple queen	Rest of the genome
probable cytochrome P450 4aa1	LOC105205156	6.17596	Multiple queen	Unknown
uncharacterized LOC105205177	LOC105205177	2.24905	Multiple queen	Unknown
cytochrome P450 9e2-like	LOC105205188	2.6361	Multiple queen	Rest of the genome
cytochrome P450 9e2-like	LOC105205192	2.60234	Multiple queen	Rest of the genome
cytochrome P450 9e2-like	LOC105205214	2.6098	Multiple queen	Rest of the genome
cytochrome P450 9e2-like	LOC105205219	2.61321	Multiple queen	Rest of the genome
guanine nucleotide-binding protein subunit gamma-e	LOC105205228	2.49796	Multiple queen	Rest of the genome
NADPH oxidase 5-like	LOC105205234	2.76905	Multiple queen	Rest of the genome
uncharacterized LOC105205245	LOC105205245	2.52149	Multiple queen	Rest of the genome
aminopeptidase N	LOC105205292	3.04413	Multiple queen	Rest of the genome
pro-corazonin	LOC105205323	2.91301	Multiple queen	Rest of the genome
cytochrome P450 4C1	LOC105205339	5.42899	Multiple queen	Unknown
uncharacterized LOC105205382	LOC105205382	2.71058	Multiple queen	Unknown
elongation of very long chain fatty acids protein 7-like	LOC105205458	2.69365	Multiple queen	Unknown
fatty acid synthase-like	LOC105205615	2.65662	Multiple queen	Unknown
acyl-CoA-binding protein homolog	LOC105205627	2.8745	Multiple queen	Rest of the genome
protein PELPK1	LOC105205670	2.10199	Multiple queen	Rest of the genome
eukaryotic translation initiation factor 4B	LOC105205711	-2.20197	Single queen	Rest of the genome
fatty acid synthase-like	LOC105205905	8.78694	Multiple queen	Unknown
uncharacterized LOC105205974	LOC105205974	2.41582	Multiple queen	Unknown
fibroblast growth factor receptor 3	LOC105206010	2.2027	Multiple queen	Rest of the genome
rho guanine nucleotide exchange factor 7-like	LOC105206011	-2.73626	Single queen	Unknown
fatty acid synthase-like	LOC105206041	3.25354	Multiple queen	Unknown
elongation of very long chain fatty acids protein AAEL008004-like	LOC105206101	1.73339	Multiple queen	Unknown
putative fatty acyl-CoA reductase CG5065	LOC105206143	6.83946	Multiple queen	Unknown
uncharacterized LOC105206152	LOC105206152	2.32765	Multiple queen	Unknown
pre-mRNA-splicing factor SYF1-like	LOC105206185	-2.63198	Single queen	Unknown
protein arginine N-methyltransferase 3-like	LOC105206276	-2.35976	Single queen	Unknown
cytochrome P450 4C1-like	LOC105206282	2.80944	Multiple queen	Unknown
uncharacterized LOC105206333	LOC105206333	2.66293	Multiple queen	Unknown
uncharacterized LOC105206374	LOC105206374	2.01979	Multiple queen	Unknown
fatty acid synthase-like	LOC105206400	2.22288	Multiple queen	Unknown
uncharacterized LOC105206443	LOC105206443	2.73165	Multiple queen	Unknown
fatty acyl-CoA reductase 1-like	LOC105206453	4.73386	Multiple queen	Unknown
cytochrome P450 4C1-like	LOC105206456	3.6444	Multiple queen	Unknown
cytochrome P450 4C1-like	LOC105206463	3.68142	Multiple queen	Unknown
uncharacterized LOC105206506	LOC105206506	2.402	Multiple queen	Unknown
elongation of very long chain fatty acids protein 1-like	LOC105206531	2.78679	Multiple queen	Unknown
cytochrome P450 4C1-like	LOC105206532	2.00093	Multiple queen	Unknown
venom allergen 4-like	LOC105206564	2.7818	Multiple queen	Unknown
proline-, glutamic acid- and leucine-rich protein 1-like	LOC105206580	2.65916	Multiple queen	Unknown
cytochrome P450 6k1-like	LOC105206584	2.51485	Multiple queen	Unknown
uncharacterized LOC105206606	LOC105206606	3.18478	Multiple queen	Unknown
uncharacterized LOC105206635	LOC105206635	-1.94742	Single queen	Supergene
juvenile hormone acid O-methyltransferase-like	LOC105206645	2.12919	Multiple queen	Unknown
uncharacterized LOC105206657	LOC105206657	2.0868	Multiple queen	Unknown
probable cytochrome P450 4aa1	LOC105206700	6.52797	Multiple queen	Unknown
uncharacterized LOC105206713	LOC105206713	3.82578	Multiple queen	Unknown
WAS/WASL-interacting protein family member 1-like	LOC105206806	3.29567	Multiple queen	Unknown
uncharacterized LOC105206906	LOC105206906	3.87854	Multiple queen	Unknown
uncharacterized LOC105206938	LOC105206938	2.97385	Multiple queen	Unknown
cytochrome P450 4C1-like	LOC105206965	4.57218	Multiple queen	Unknown
myb-like protein V	LOC105206977	2.29831	Multiple queen	Unknown
apoptosis inhibitor 5-like protein API5	LOC105206997	6.01206	Multiple queen	Unknown
uncharacterized LOC105207010	LOC105207010	5.11864	Multiple queen	Unknown
uncharacterized LOC105207080	LOC105207080	3.33512	Multiple queen	Unknown
uncharacterized LOC105207135	LOC105207135	2.27251	Multiple queen	Unknown
nucleolar complex protein 3 homolog	LOC105207194	4.62665	Multiple queen	Unknown
elongation of very long chain fatty acids protein 7	LOC105207261	2.40685	Multiple queen	Rest of the genome
uncharacterized LOC105207295	LOC105207295	1.92873	Multiple queen	Unknown
uncharacterized LOC105207314	LOC105207314	3.43507	Multiple queen	Unknown
uncharacterized LOC105207323	LOC105207323	4.06762	Multiple queen	Unknown
fatty acid synthase-like	LOC105207358	2.70072	Multiple queen	Unknown
farnesyl pyrophosphate synthase	LOC105207424	2.661	Multiple queen	Unknown
uncharacterized LOC105207450	LOC105207450	3.26647	Multiple queen	Supergene
farnesyl pyrophosphate synthase	LOC105207474	2.4181	Multiple queen	Rest of the genome
cytochrome P450 9e2-like	LOC105207591	2.41734	Multiple queen	Rest of the genome
cytochrome P450 9e2-like	LOC105207595	2.75146	Multiple queen	Rest of the genome
anionic trypsin-2	LOC105207761	2.68899	Multiple queen	Rest of the genome
uncharacterized LOC105207773	LOC105207773	3.91651	Multiple queen	Rest of the genome
glutathione S-transferase 1-like	LOC105207856	1.94904	Multiple queen	Unknown
regucalcin	LOC105207866	1.71759	Multiple queen	Rest of the genome
fatty acid synthase-like	LOC105207924	3.94535	Multiple queen	Unknown
rab GTPase-activating protein 1-like	LOC105207928	-2.38616	Single queen	Unknown
15-hydroxyprostaglandin dehydrogenase [NAD(+)]	LOC105208006	2.68621	Multiple queen	Rest of the genome
15-hydroxyprostaglandin dehydrogenase [NAD(+)]-like	LOC105208007	2.14306	Multiple queen	Rest of the genome
uncharacterized LOC105208032	LOC105208032	2.49748	Multiple queen	Rest of the genome
uncharacterized LOC105208058	LOC105208058	3.47206	Multiple queen	Rest of the genome
lipase 3	LOC105208099	4.05362	Multiple queen	Rest of the genome
fatty acid synthase-like	LOC105208165	2.44065	Multiple queen	Rest of the genome
cytochrome P450 4c3-like	LOC105208246	2.37558	Multiple queen	Unknown
uncharacterized LOC105208281	LOC105208281	1.98518	Multiple queen	Rest of the genome
