# Supplementary material for: Genomic architecture and evolutionary antagonism drive allelic expression bias in the social supergene of red fire ants
Source: eLife journal article supplement (doi:10.7554/elife.55862), 2020-08-10
Supplement: supp [file elife-55862-supp-v1.zip › elife_poa_e55862_Supplementary_file_5.xlsx]

## Sheet: Sheet1
a)	Publication	Project	Sequencing method	Body part	SRA	Description	b)	Colony	Caste	Body part	Town	Coordinates	Represented in VCF?
	Morandin et al 2016	PRJDB4088	Illumina paired-end	Whole body	DRS023315	Pool of 3 multiple-queen queen 1		AR43	Female alate	Thorax, head, abdomen	Ceres	-29.88, -61.94	No
				Whole body	DRS023316*	Pool of 3 multiple-queenqueen 2			Worker	Whole body
				Whole body	DRS023317	Pool of 3 multiple-queen queen 3		AR3	Female alate	Thorax, head, abdomen	Alta Gracia	-31.65, -64.44	No
				Whole body	DRS023309	Pool of 3 single-queen queens 1			Worker	Whole body
				Whole body	DRS023310	Pool of 3 single-queen queens 2		AR28	Worker	Whole body	Tortugas	-32.74, -61.82	Yes
				Whole body	DRS023311	Pool of 3 single-queen queens 3		AR118	Female alate	Thorax, head, abdomen	San Carlos	-27.75, -55.89	No
	Wurm et al 2011	PRJNA49629	Illumina single-end	Whole body	SRS377035	4 pooled multiple-queen queens 1			Worker	Whole body
				Whole body	SRS376911	4 pooled multiple-queen queens 2		AR114	Worker	Whole body	Berón de Astrada	-27.53, -57.56	Yes
				Whole body	SRS376910	4 pooled multiple-queen queens 3			Female alate	Thorax, head, abdomen
				Whole body	SRS376905	4 pooled multiple-queen queens 4		AR112	Female alate	Thorax, head, abdomen	Berón de Astrada	-27.53, -57.56	Yes
				Whole body	SRS376904	4 pooled multiple-queen queens 5			Worker	Whole body
				Whole body	SRS376903	4 pooled multiple-queen queens 6		AR111	Female alate	Thorax, head, abdomen	Berón de Astrada	-27.53, -57.56	Yes
	Fontana et al 2019	PRJNA542500	Illumina paired-end	Whole body	SRX5822395	2 pooled multiple-queen queens 1		AR104	Whole body	Worker	Barranqueras	-27.46, -58.91	No
				Whole body	SRX5822389	2 pooled multiple-queen queens 2
				Whole body	SRX5822391	2 pooled multiple-queen queens 3
				Whole body	SRX5822393	2 pooled multiple-queen queens 4
