# Supplementary material for: Genomic architecture and evolutionary antagonism drive allelic expression bias in the social supergene of red fire ants
Source: eLife journal article supplement (doi:10.7554/elife.55862), 2020-08-10
Supplement: supp [file elife-55862-supp-v1.zip › elife_poa_e55862_Supplementary_file_6.xlsx]

## Sheet: Sheet1
Colony	Town	Coordinates
AR102	Barranqueras	-27.46, -58.91
AR103	Barranqueras	-27.46, -58.91
AR111	Berón de Astrada	-27.53, -57.56
AR112	Berón de Astrada	-27.53, -57.56
AR113	Berón de Astrada	-27.53, -57.56
AR114	Berón de Astrada	-27.53, -57.56
AR116	Vellejos Cué	-27.61, -57.00
AR122	Carlos Pellegrini	-28.54, -57.18
AR179	Villa Maria	-32.39, -63.24
AR181	Villa Maria	-32.39, -63.24
AR28	Tortugas	-32.74, -61.82
AR46	Santa Fe - Santa Rosa	-31.56, -60.52
AR58	Médanos	-33.44, -59.07
