# Supplementary figures and images for: Genomic architecture and evolutionary antagonism drive allelic expression bias in the social supergene of red fire ants
Source: eLife journal article supplement (doi:10.7554/elife.55862), 2020-08-10

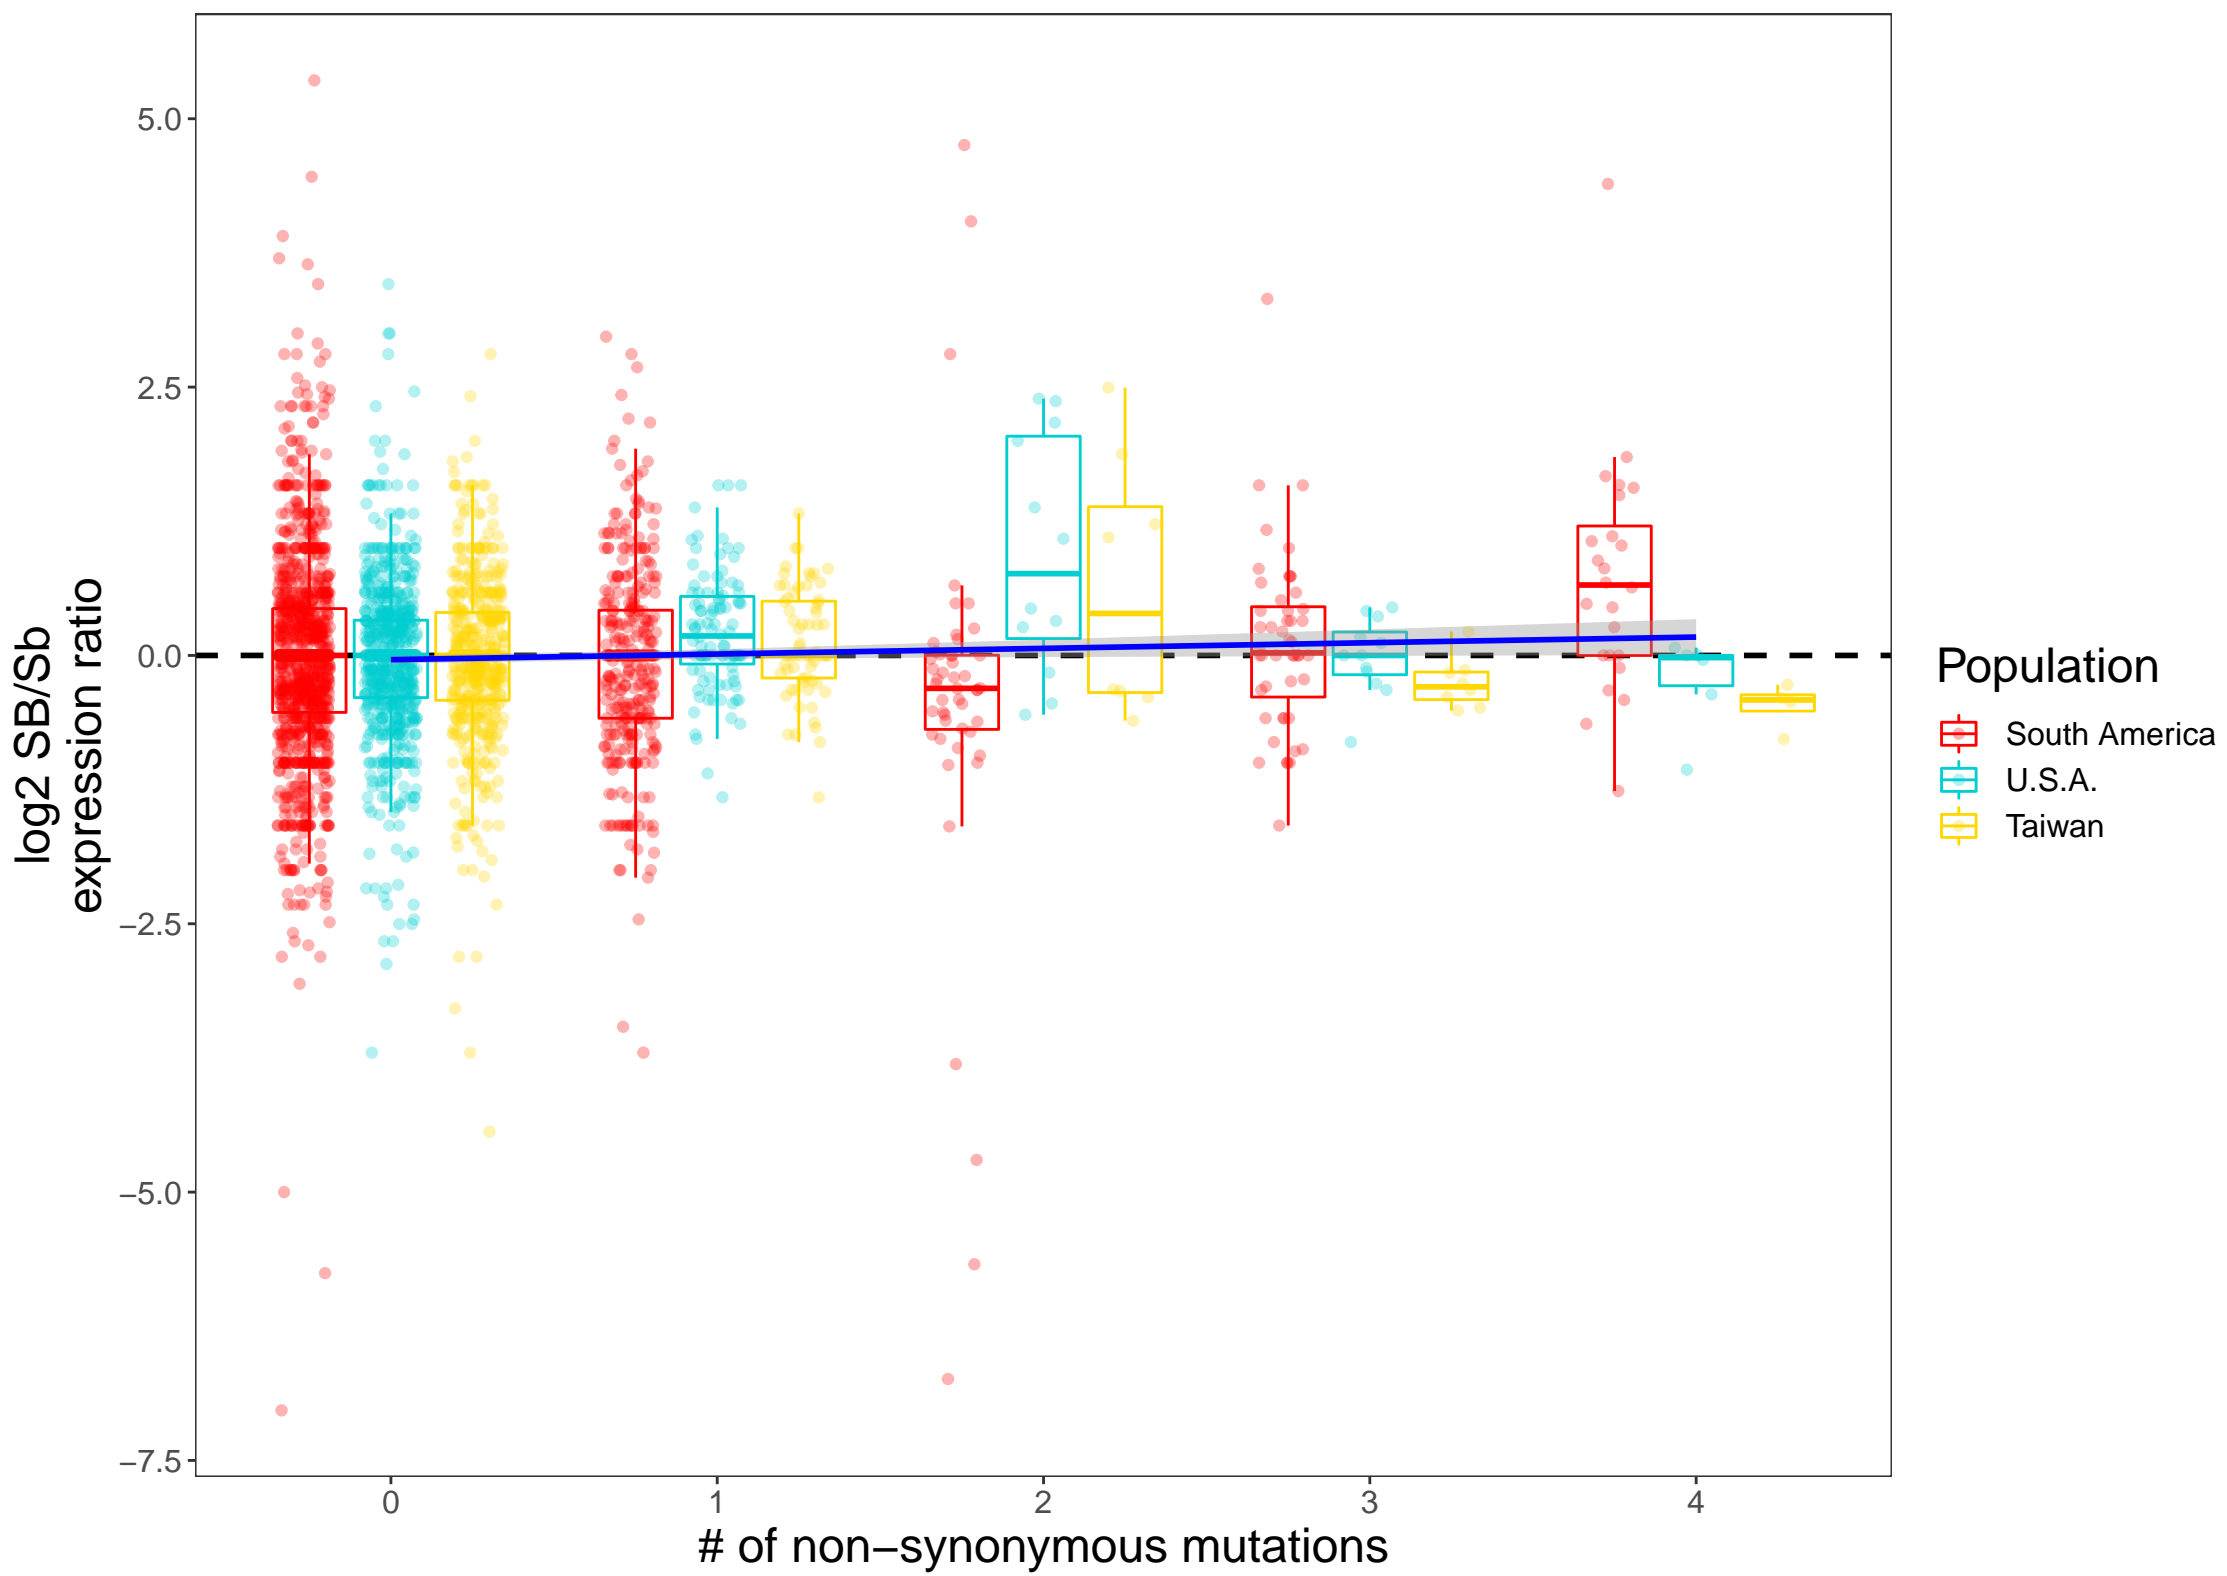

Supplement: supp [file elife-55862-supp-v1.zip]

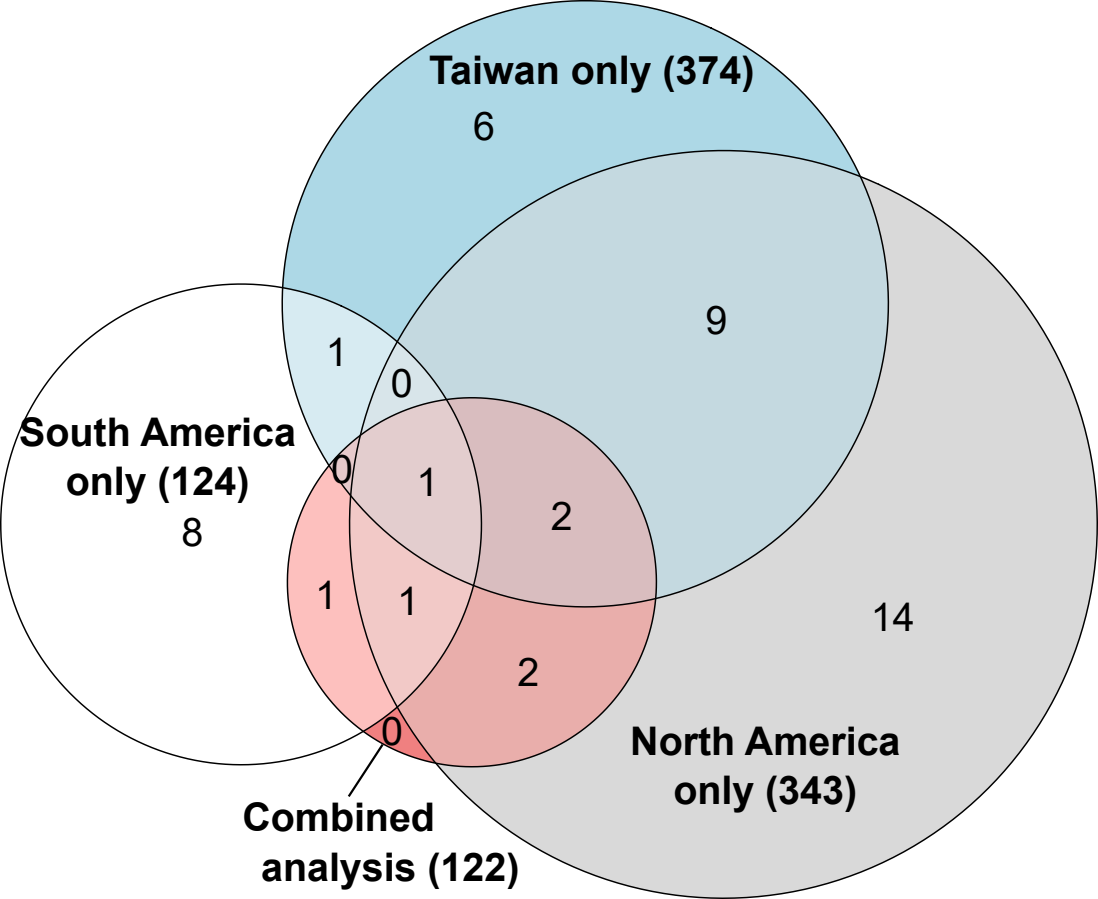

Supplement: supp [file elife-55862-supp-v1.zip › elife_poa_e55862_Figure_1_figure_supplement_1.pdf]

Log2 expression ratios

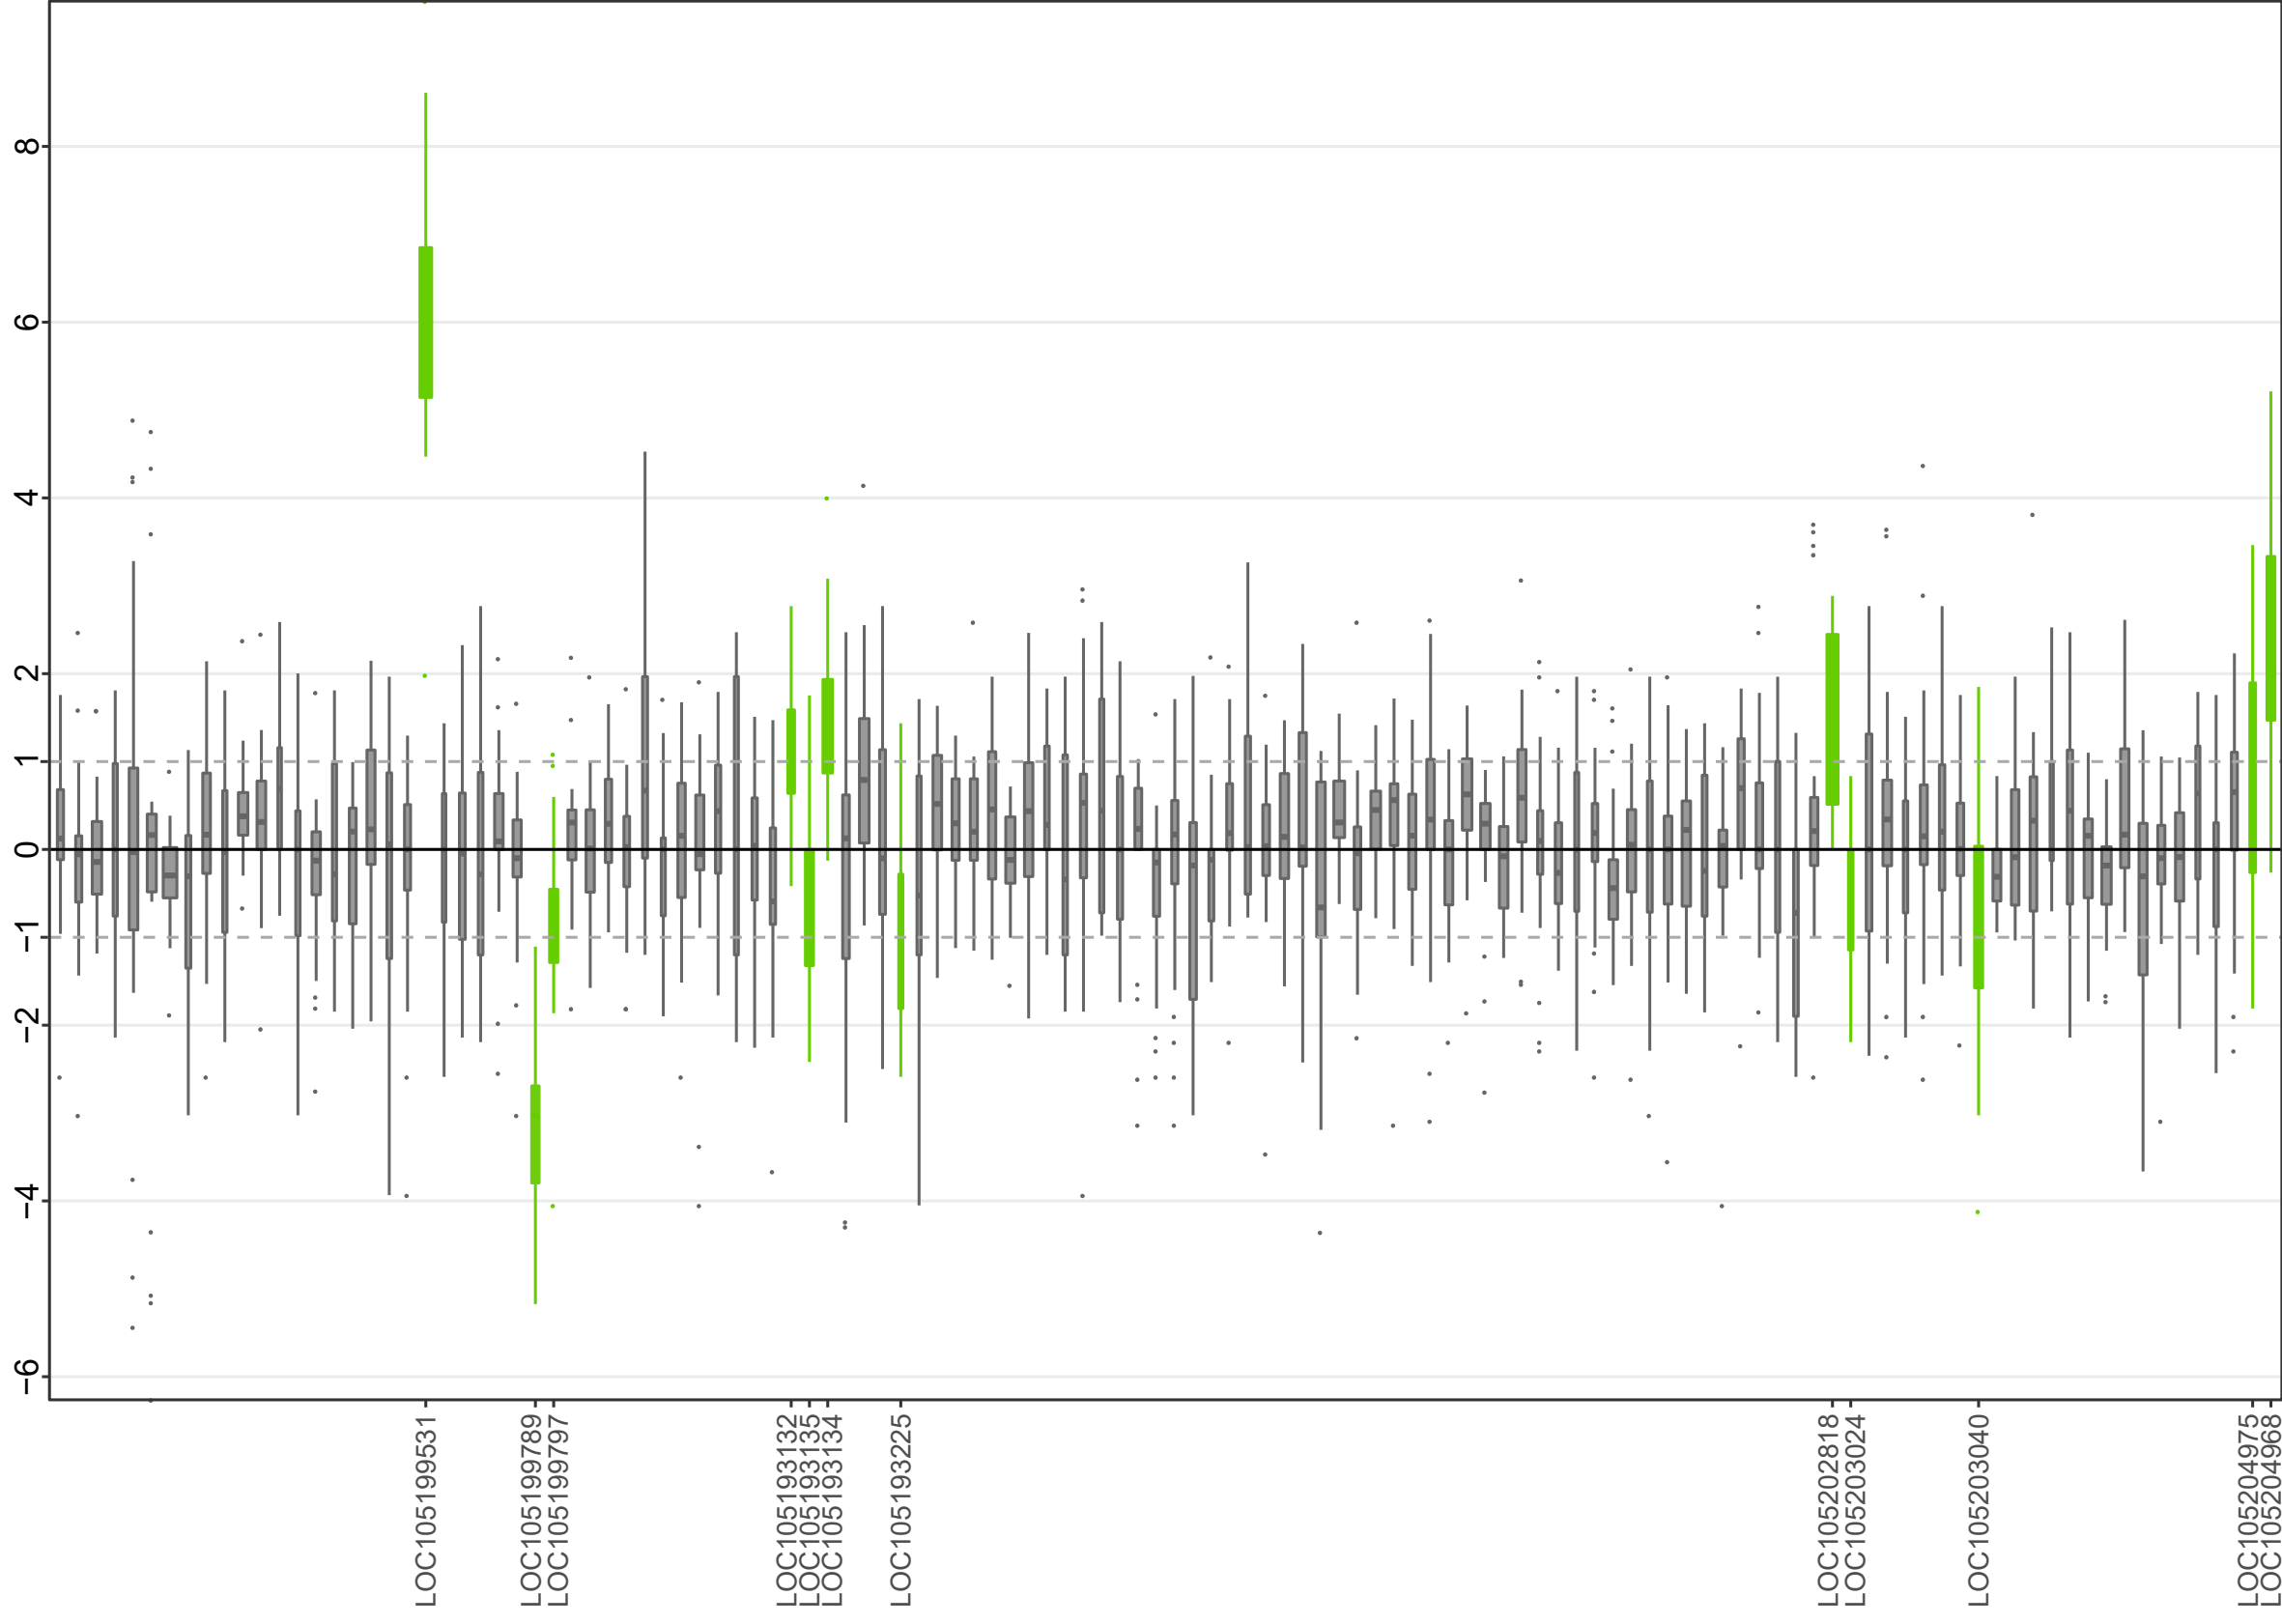

Supplement: supp [file elife-55862-supp-v1.zip › elife_poa_e55862_Figure_1_figure_supplement_2.pdf]

Log2 expression ratios

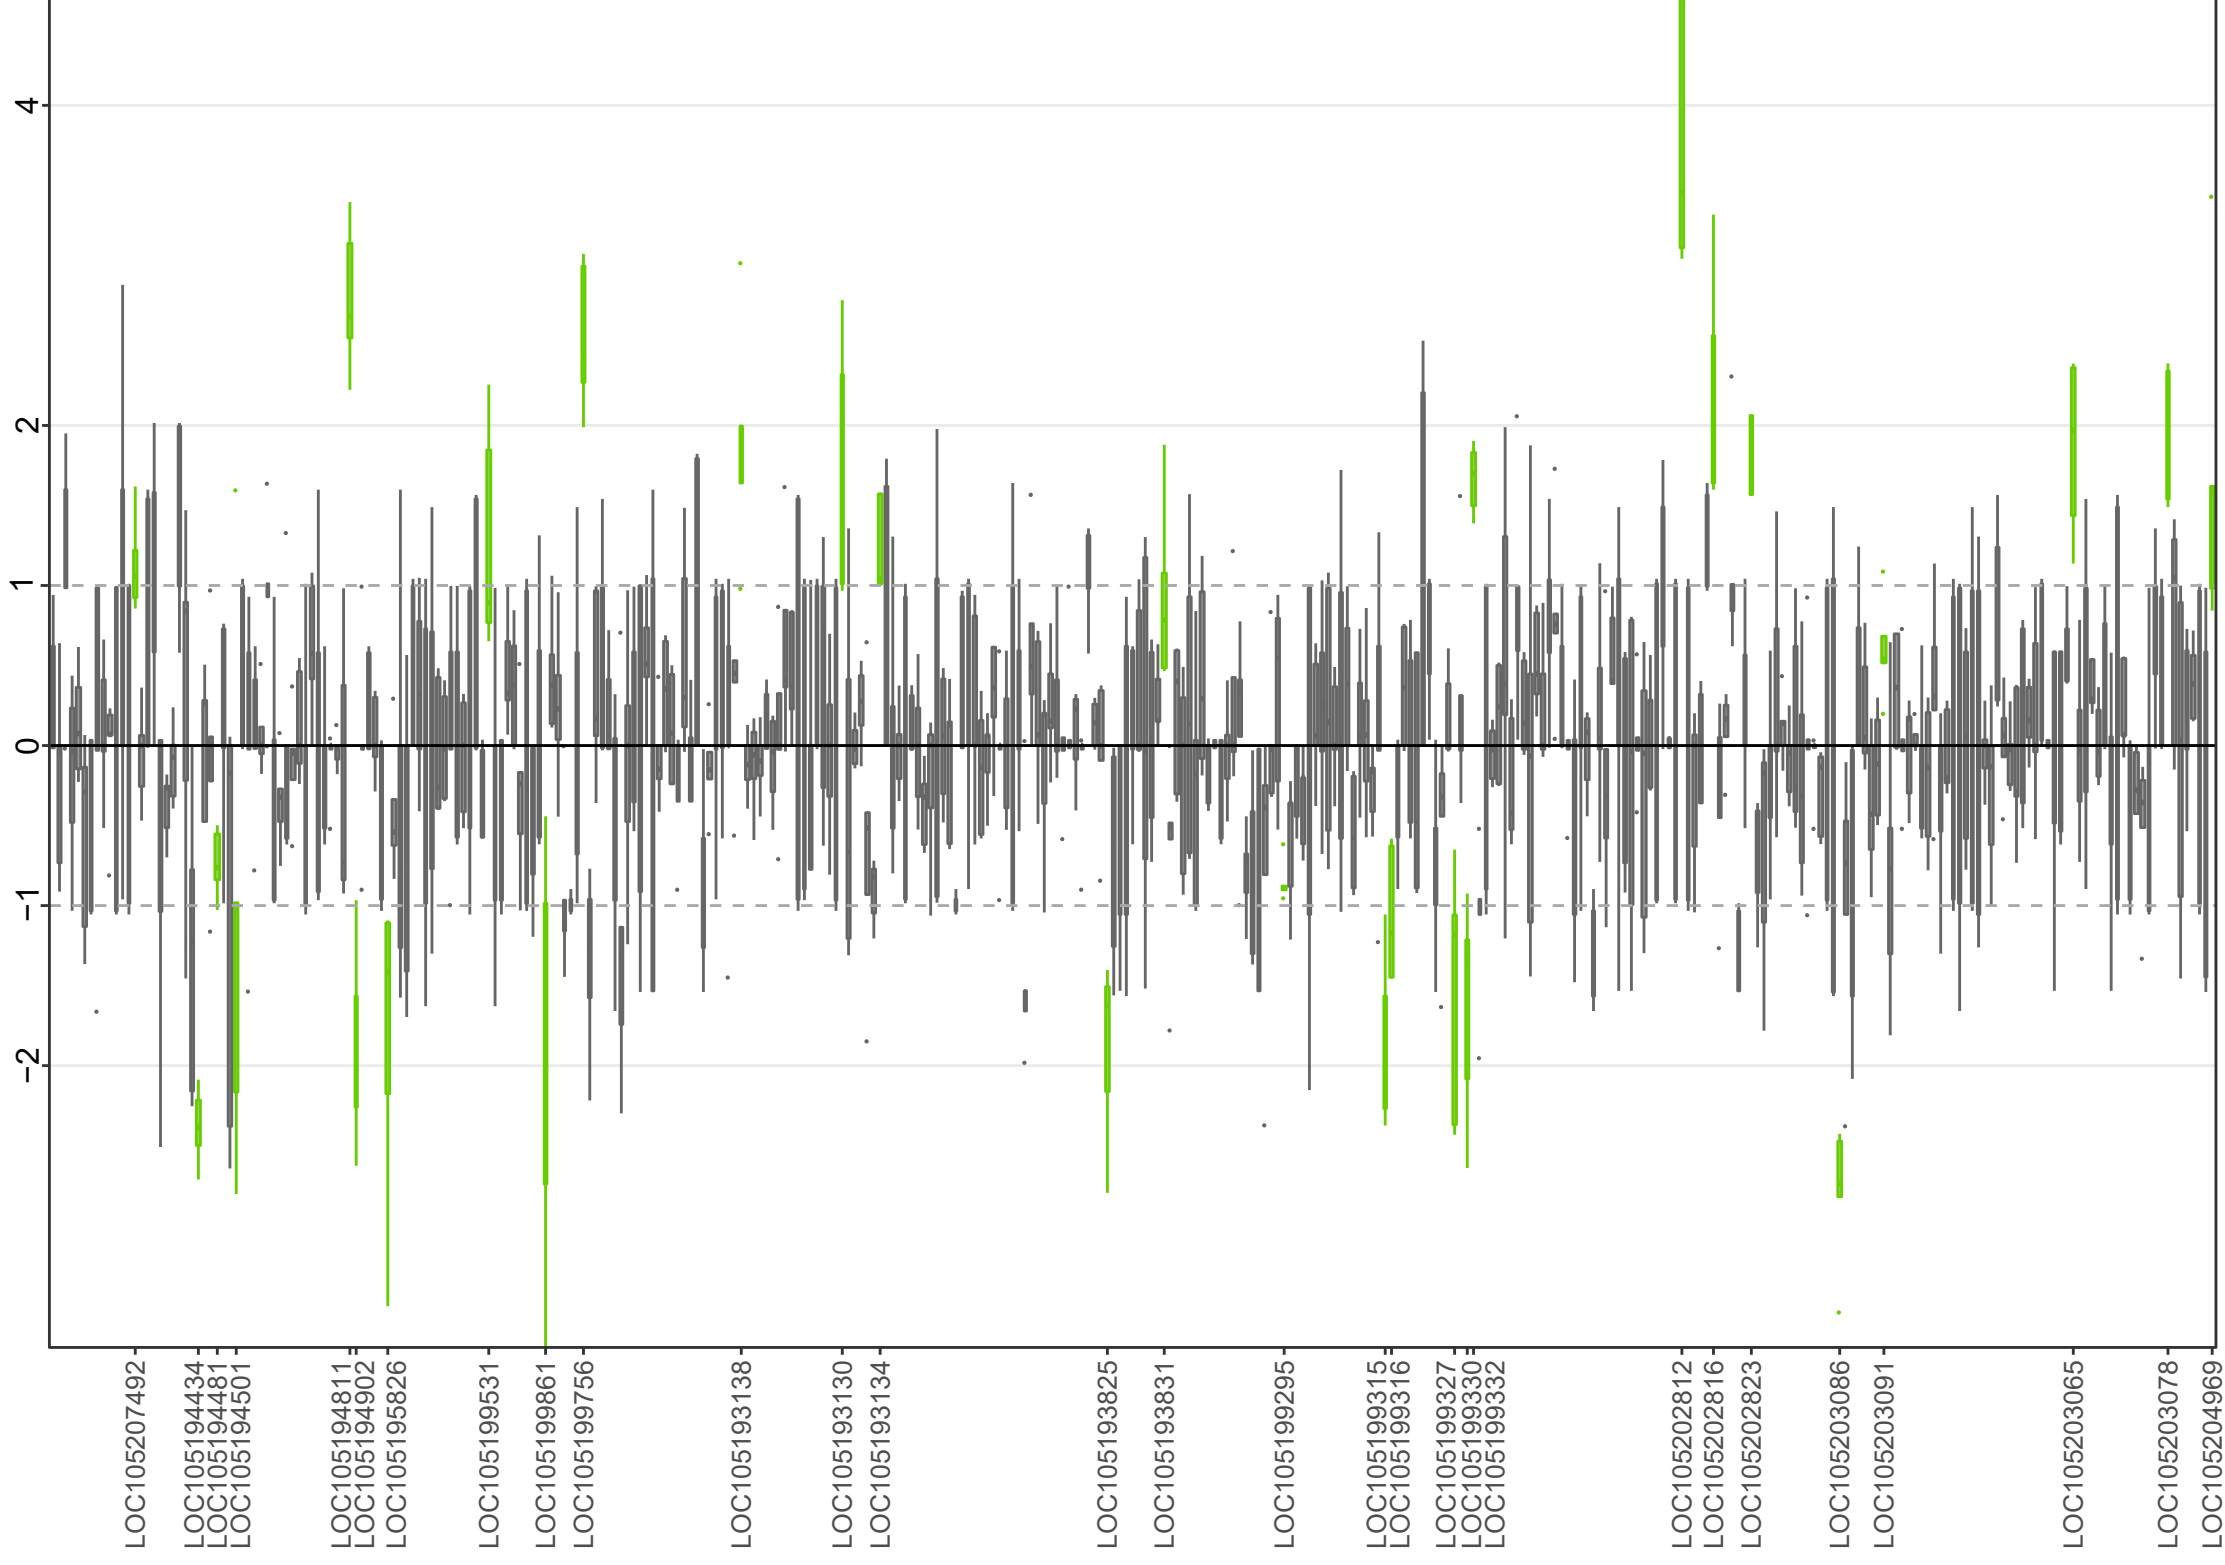

Supplement: supp [file elife-55862-supp-v1.zip › elife_poa_e55862_Figure_1_figure_supplement_3.pdf]

Log2 expression ratios

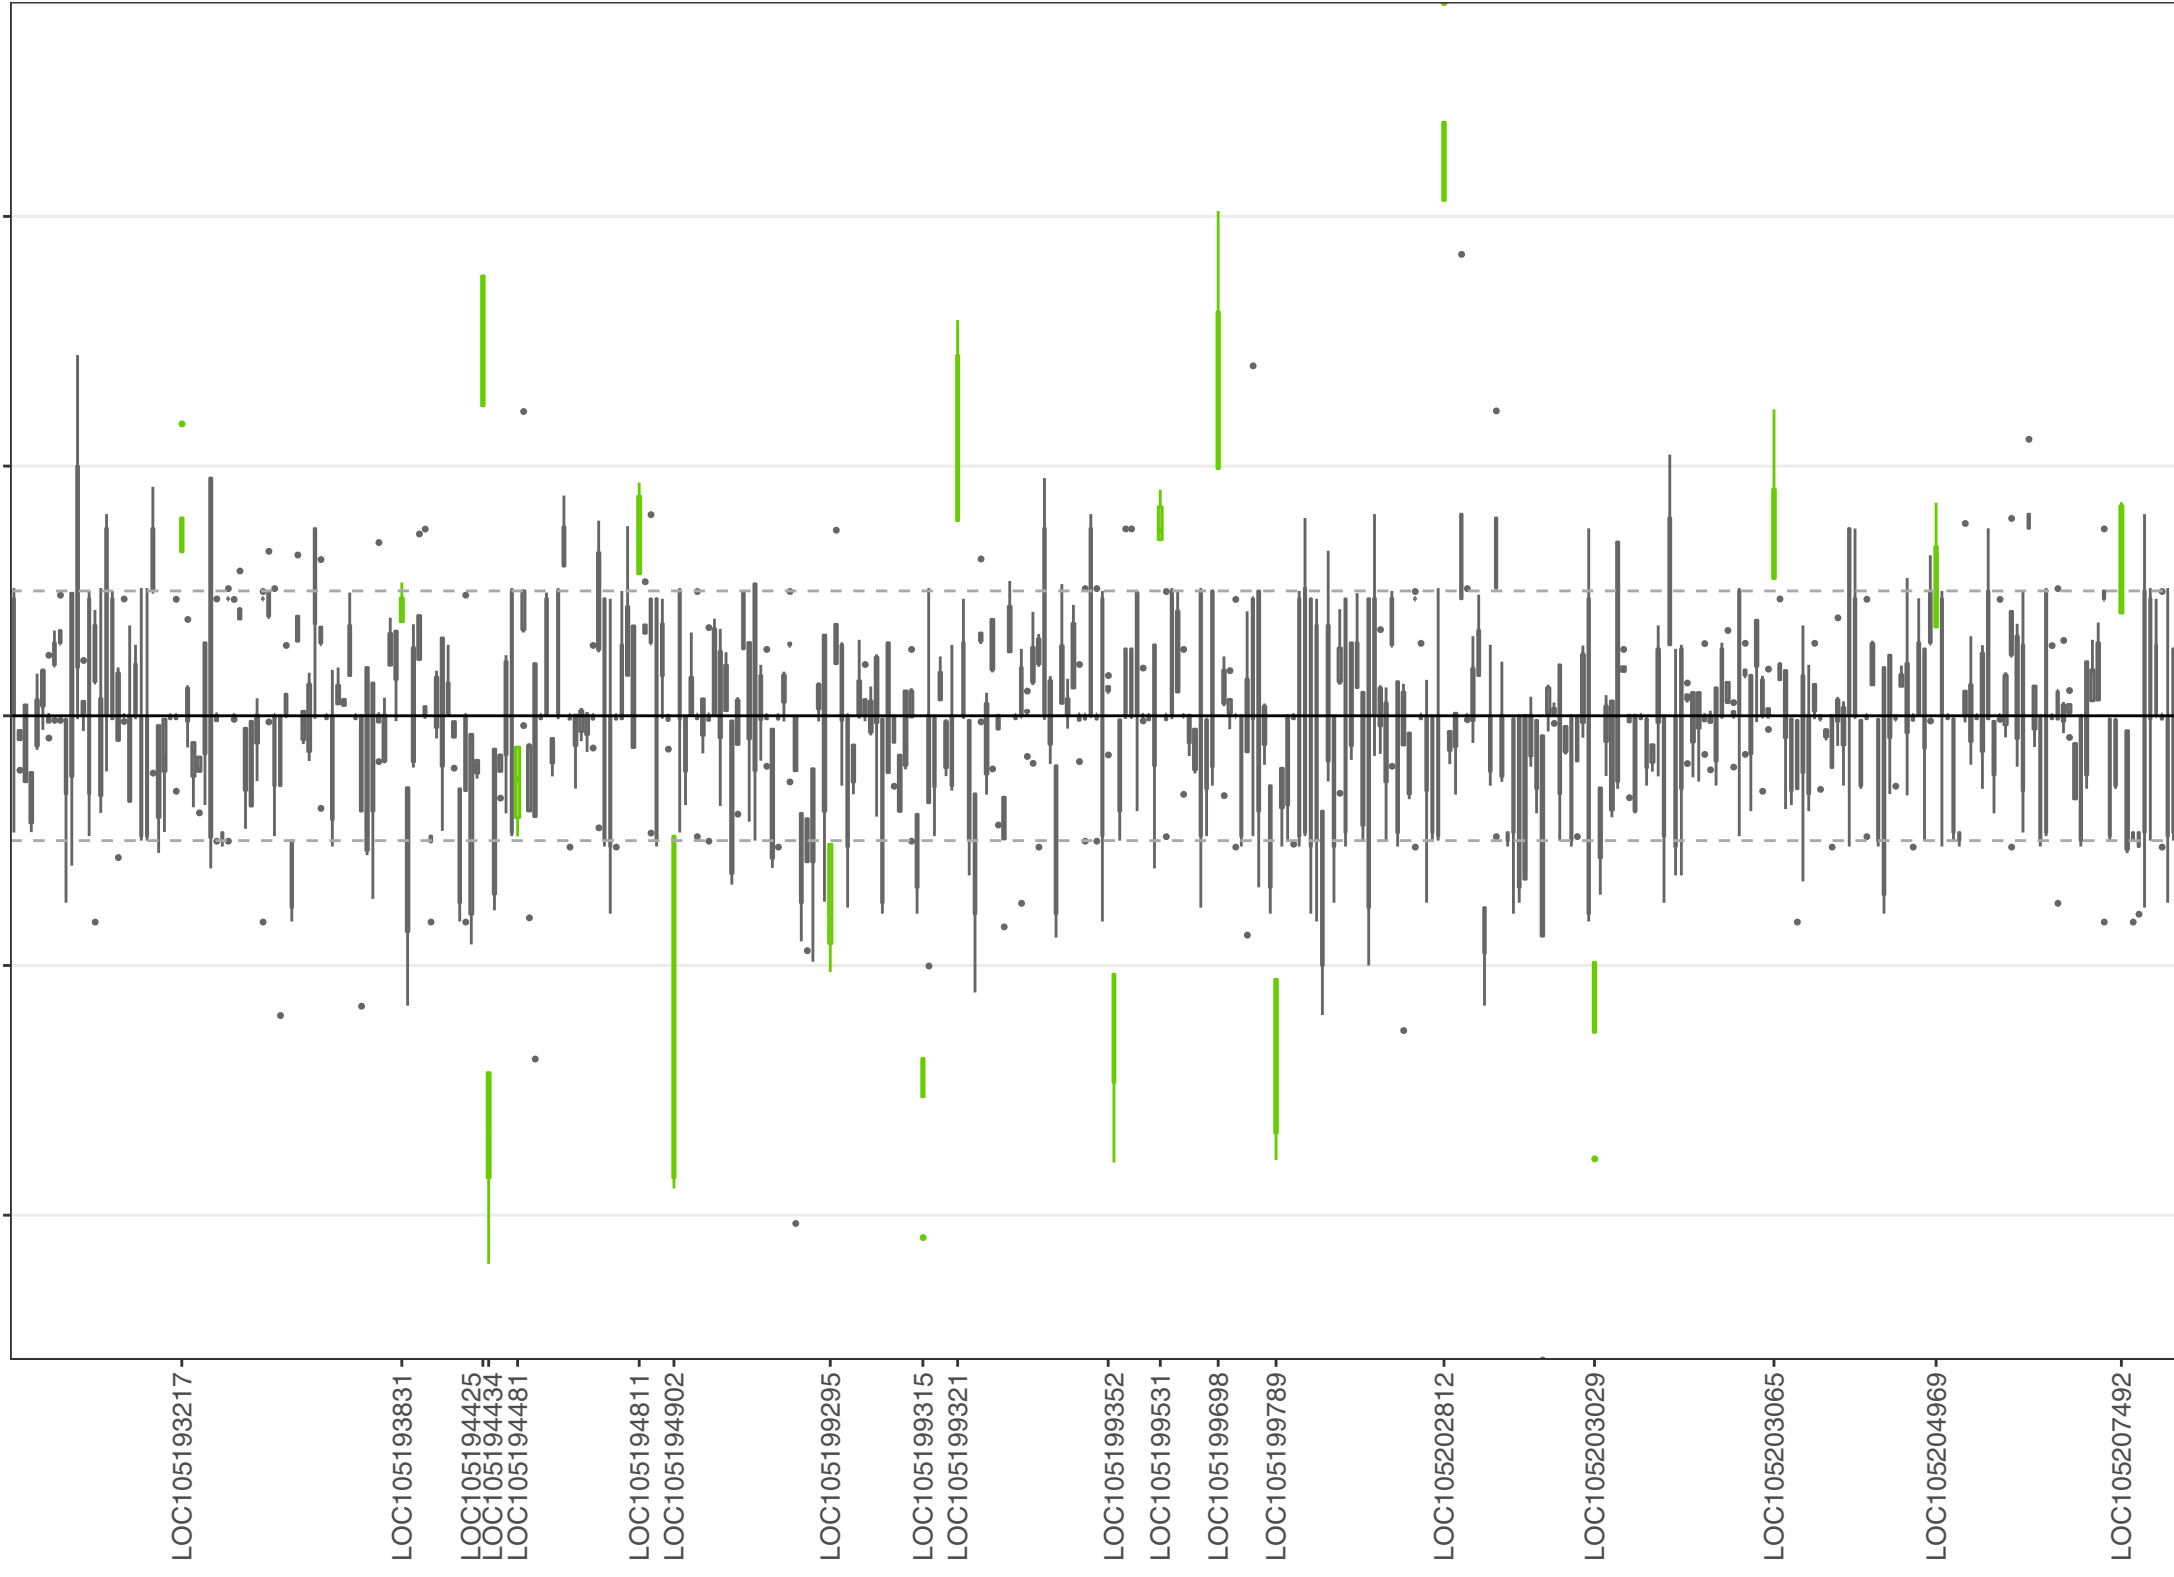

Supplement: supp [file elife-55862-supp-v1.zip › elife_poa_e55862_Figure_1_figure_supplement_4.pdf]

a)

$$r^2 = 0.67$$

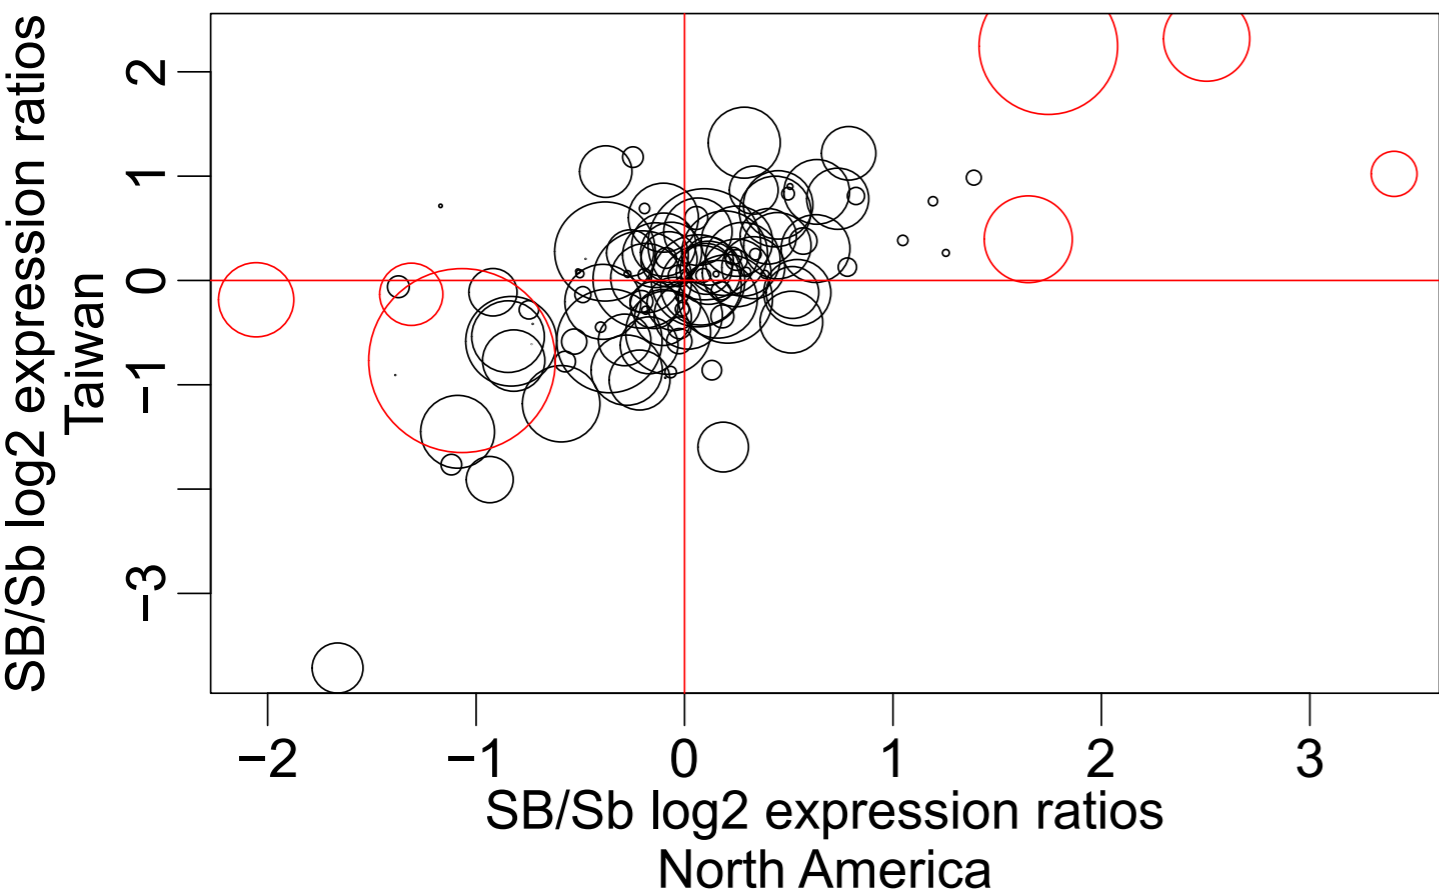

b)

$$r^2 = 0.18$$

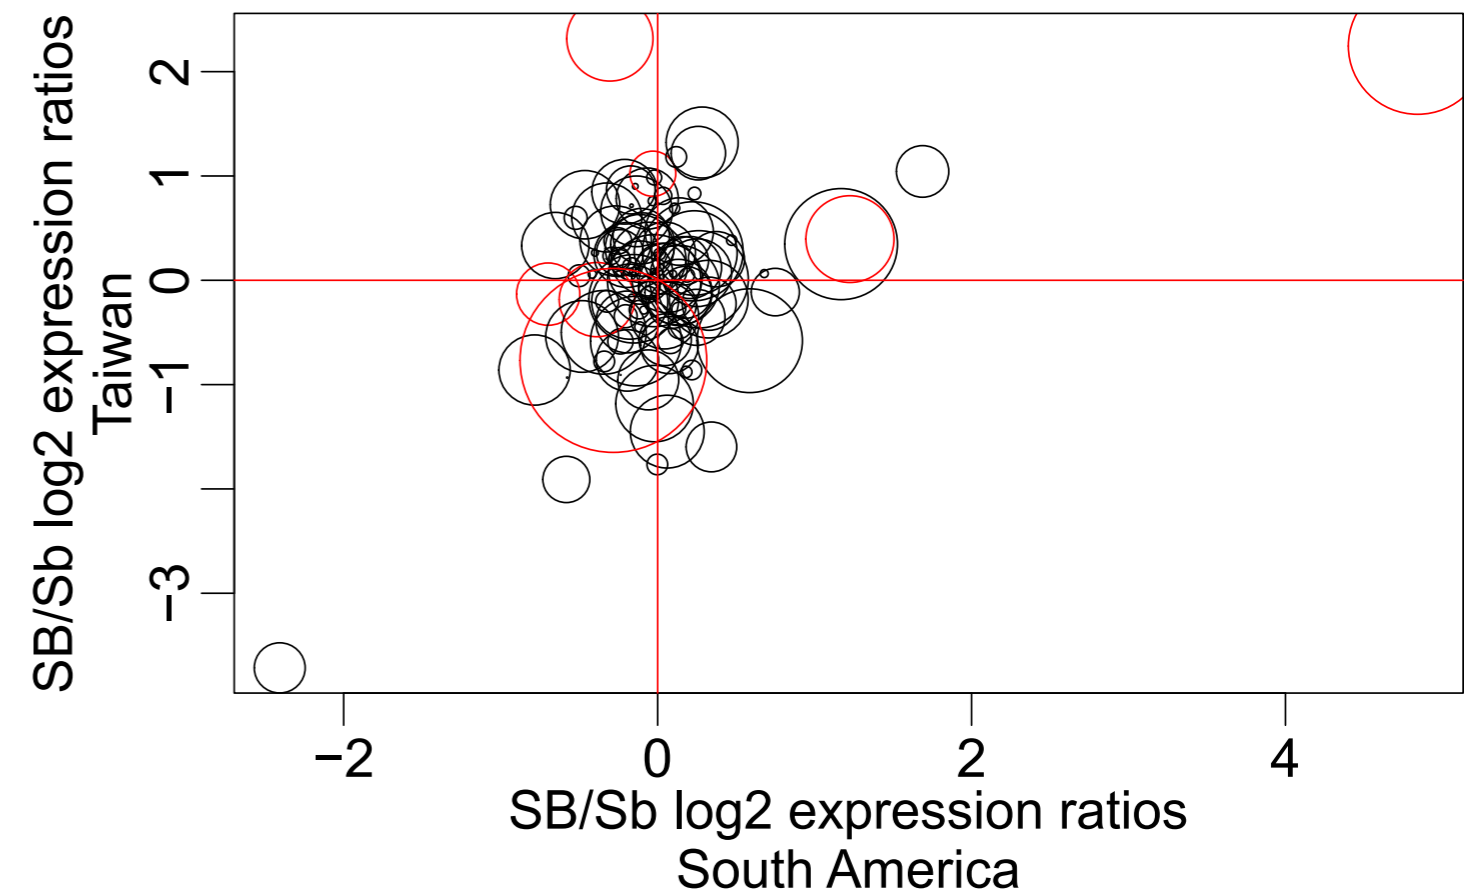

c)

$$r^2 = 0.21$$

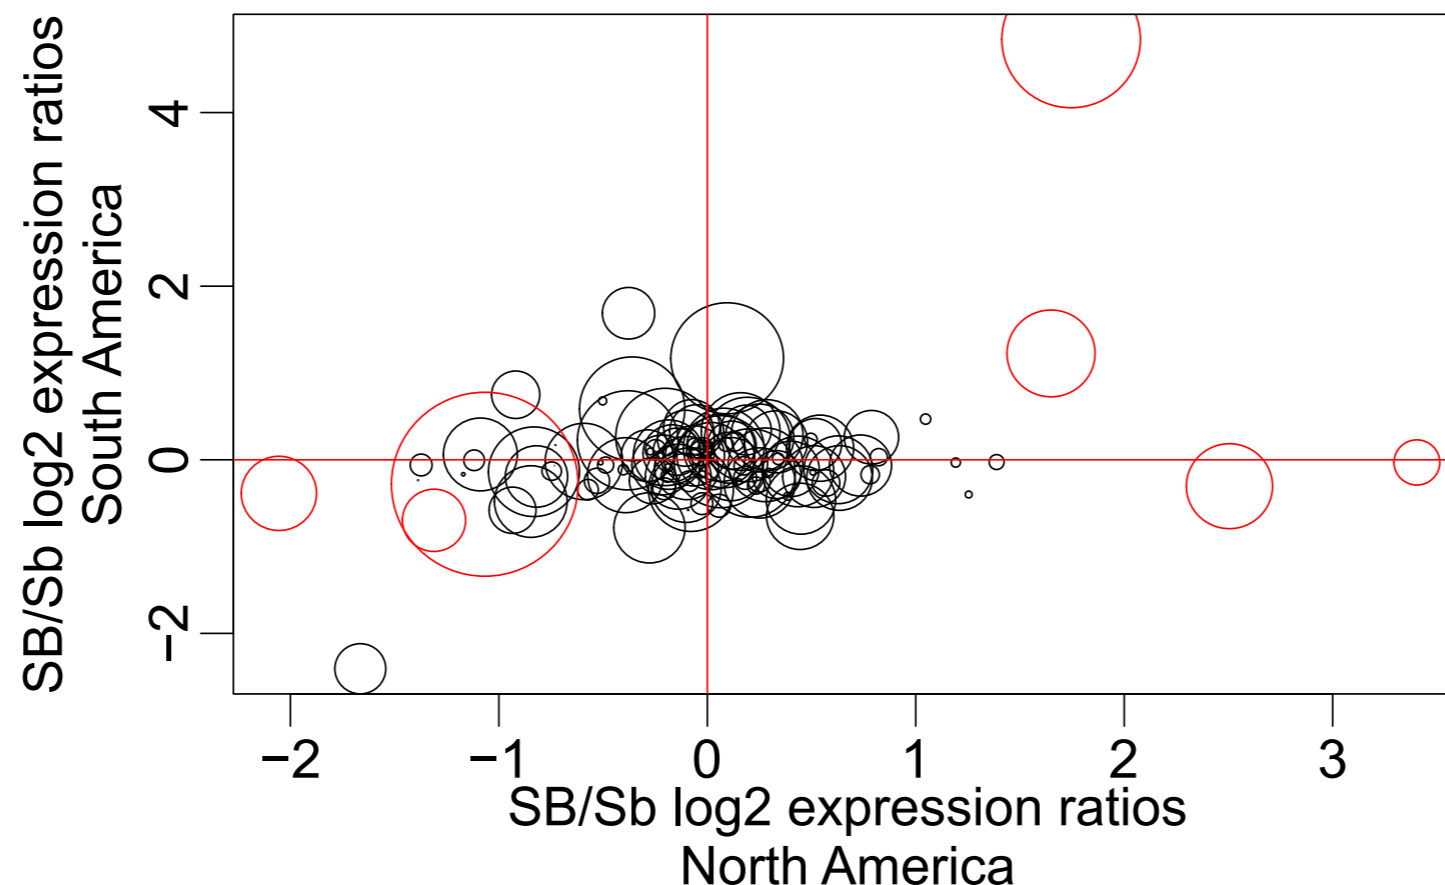

Supplement: supp [file elife-55862-supp-v1.zip › elife_poa_e55862_Figure_1_figure_supplement_5.pdf]

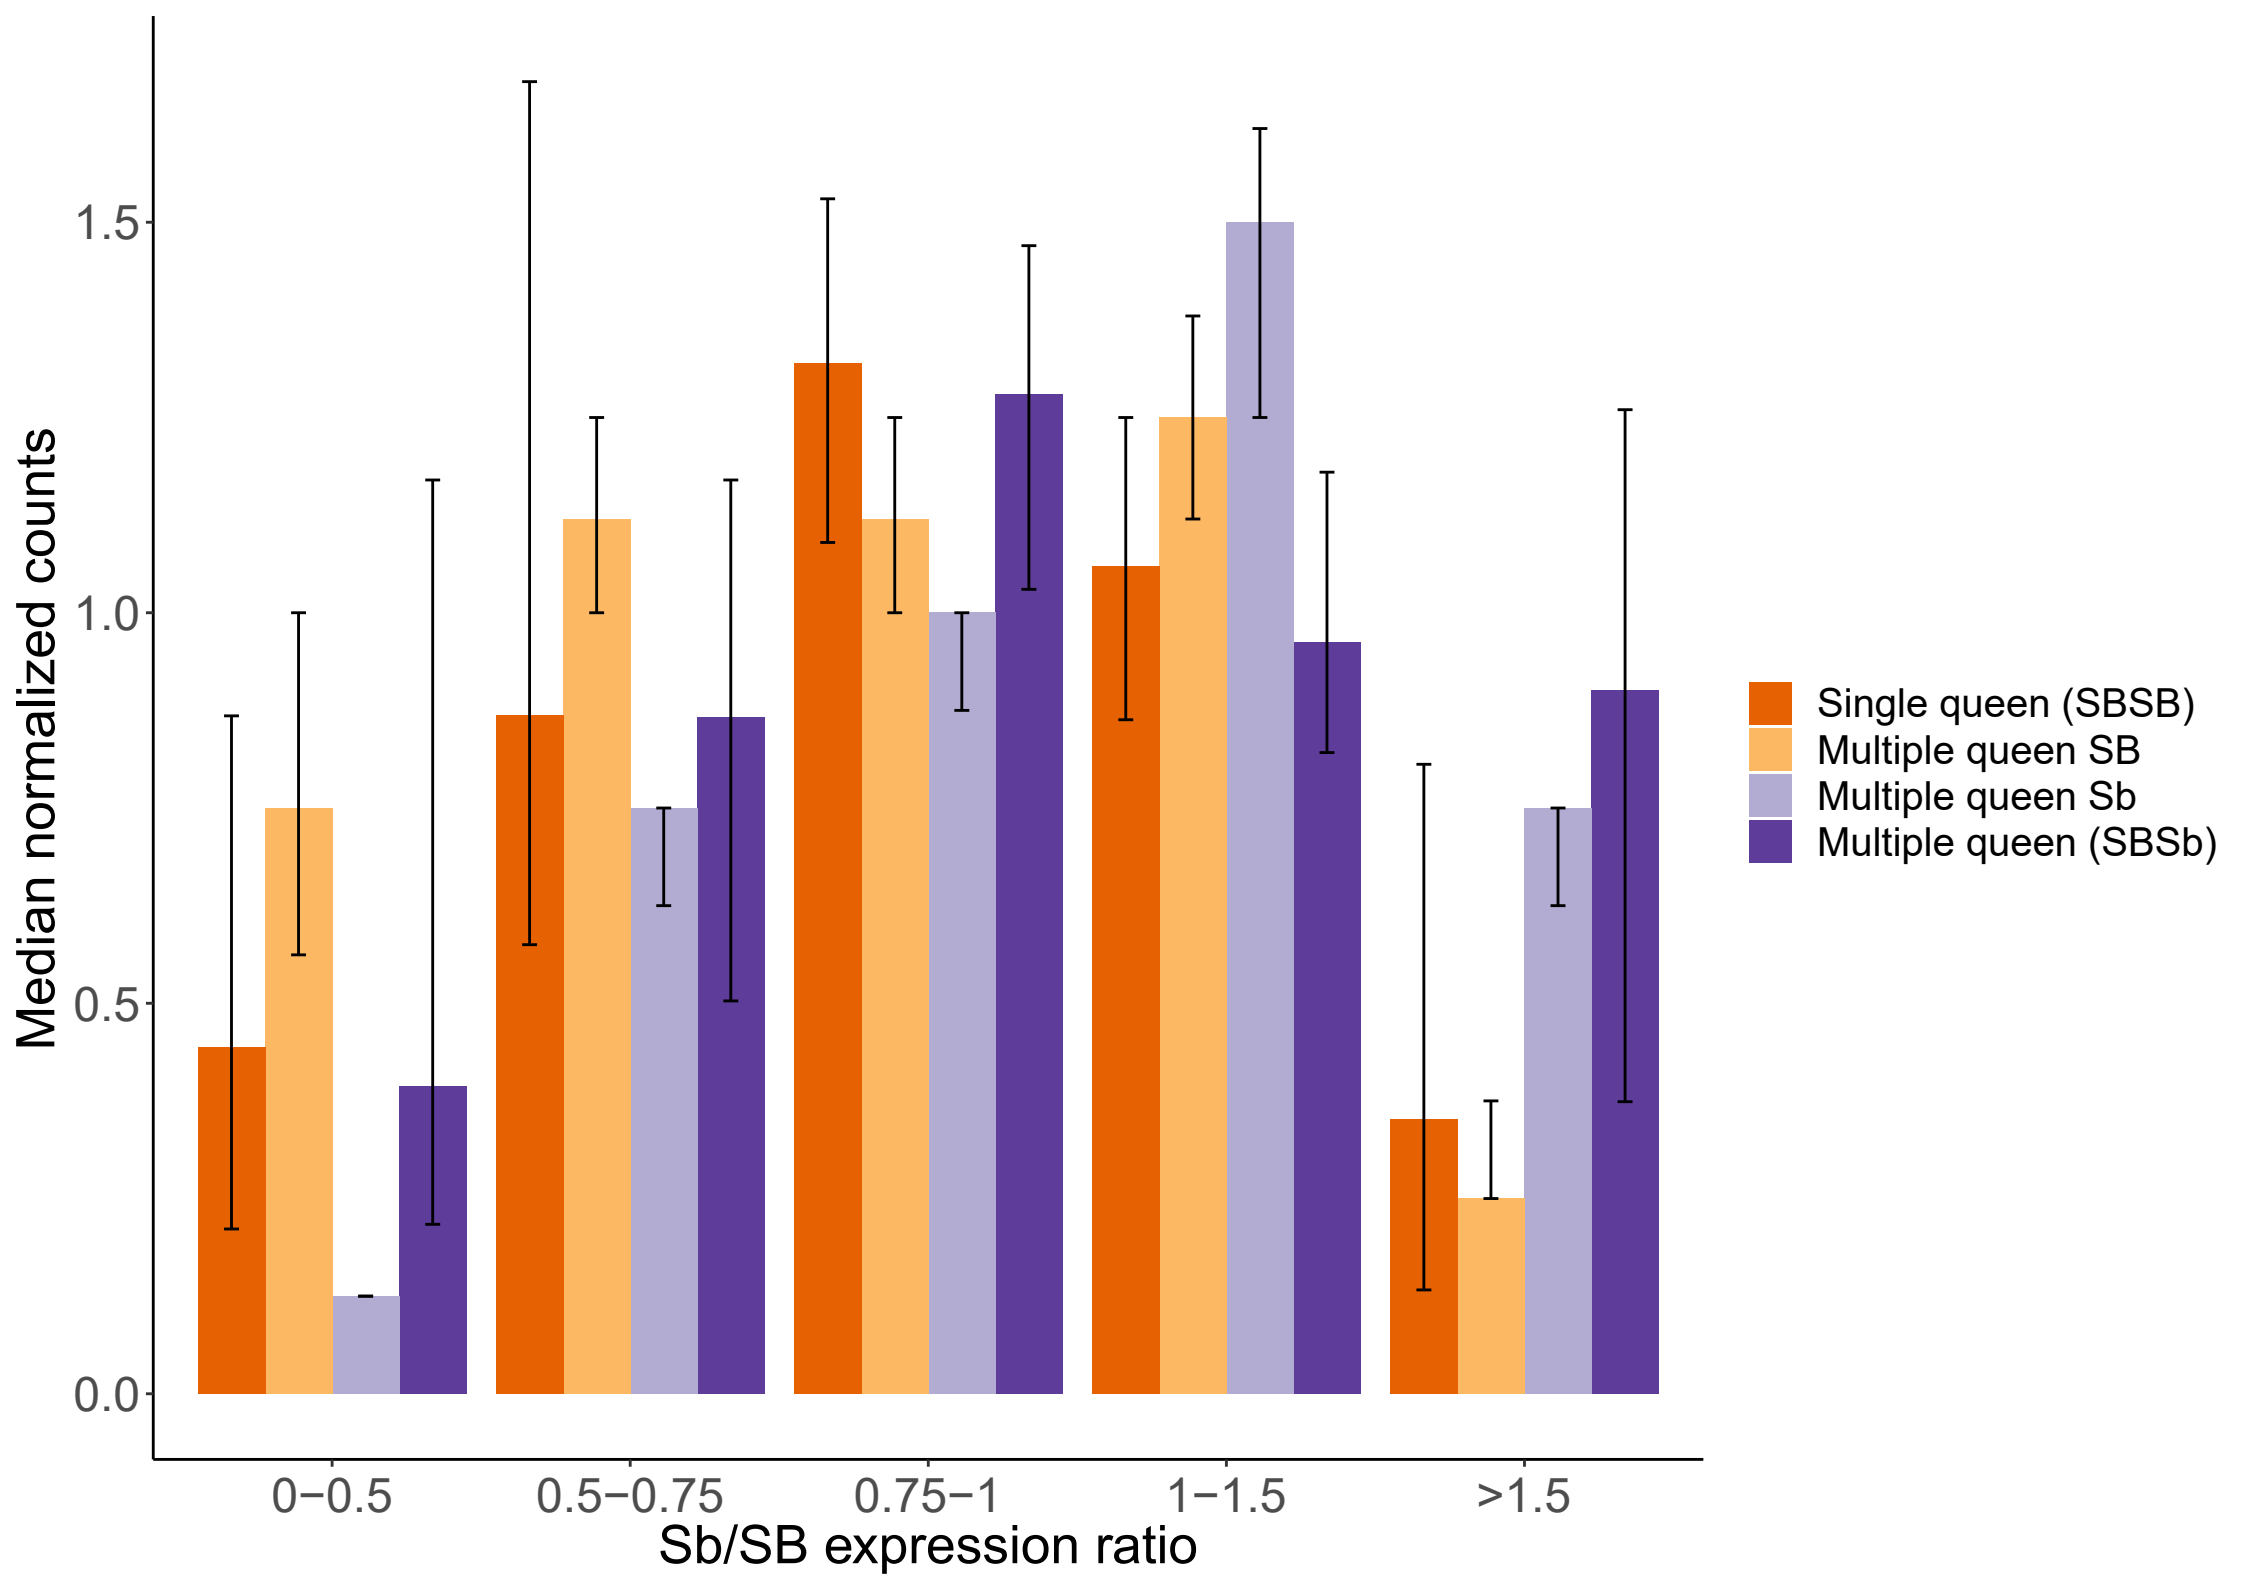

Supplement: supp [file elife-55862-supp-v1.zip › elife_poa_e55862_Figure_3_figure_supplement_1.pdf]
